# Supplementary material for: Whole-Genome Transcript Expression Profiling Reveals Novel Insights into Transposon Genes and Non-Coding RNAs during Atlantic Salmon Seawater Adaptation
Source: Biology (Basel). 2021 Dec 21;11(1):1. doi: 10.3390/biology11010001 (PMC8772943; doi:10.3390/biology11010001)
Supplement: Supplementary file 1 [file biology-11-00001-s001.zip]

Archive with 5 entries (5 files):
- Supplementary Figures_revision2_CGE.pdf
- Table S1_chr clusters.xls
- Table S2_DEG transcripts annotation.xlsx
- Table S3_miRNA prediction.xlsx
- Table S4_primer list.xlsx
