# Supplementary material for: Whole-Genome Transcript Expression Profiling Reveals Novel Insights into Transposon Genes and Non-Coding RNAs during Atlantic Salmon Seawater Adaptation
Source: Biology (Basel). 2021 Dec 21;11(1):1. doi: 10.3390/biology11010001 (PMC8772943; doi:10.3390/biology11010001)
Supplement: Supplementary file 1 [file biology-11-00001-s001.zip › Table S1_chr clusters.xls]

## Sheet: Multi BLAST_hk
Query	Number of HSPs	Lowest E-value	Accession (E-value)	Description (E-value)	Greatest identity %	Accession (identity %)	Description (identity %)	Greatest positive %	Accession (positive %)	Description (positive %)	Greatest HSP length	Accession (HSP length)	Description (HSP length)	Greatest bit score	Accession (bit score)	Description (bit score)
Hk_0001146	191	2.6204e-34	XP_014010594.1	PREDICTED: lysophospholipid acyltransferase 7 isoform X2 [Salmo salar]	100	XP_014010594.1	PREDICTED: lysophospholipid acyltransferase 7 isoform X2 [Salmo salar]	100	XP_014010594.1	PREDICTED: lysophospholipid acyltransferase 7 isoform X2 [Salmo salar]	261	ACH85309.1	transposase-like [Salmo salar]	143.28	XP_014010594.1	PREDICTED: lysophospholipid acyltransferase 7 isoform X2 [Salmo salar]
Hk_0001147	196	2.62372e-34	XP_014010594.1	PREDICTED: lysophospholipid acyltransferase 7 isoform X2 [Salmo salar]	100	XP_014010594.1	PREDICTED: lysophospholipid acyltransferase 7 isoform X2 [Salmo salar]	100	XP_014010594.1	PREDICTED: lysophospholipid acyltransferase 7 isoform X2 [Salmo salar]	261	ACH85309.1	transposase-like [Salmo salar]	143.28	XP_014010594.1	PREDICTED: lysophospholipid acyltransferase 7 isoform X2 [Salmo salar]
Hk_0001148	207	6.91208e-61	XP_014010586.1	PREDICTED: lysophospholipid acyltransferase 7 isoform X1 [Salmo salar]	100	XP_014010586.1	PREDICTED: lysophospholipid acyltransferase 7 isoform X1 [Salmo salar]	100	XP_014010586.1	PREDICTED: lysophospholipid acyltransferase 7 isoform X1 [Salmo salar]	261	ACH85309.1	transposase-like [Salmo salar]	221.861	XP_014010586.1	PREDICTED: lysophospholipid acyltransferase 7 isoform X1 [Salmo salar]
Hk_0001149	203	6.922e-61	XP_014010586.1	PREDICTED: lysophospholipid acyltransferase 7 isoform X1 [Salmo salar]	100	XP_014010586.1	PREDICTED: lysophospholipid acyltransferase 7 isoform X1 [Salmo salar]	100	XP_014010586.1	PREDICTED: lysophospholipid acyltransferase 7 isoform X1 [Salmo salar]	261	ACH85309.1	transposase-like [Salmo salar]	221.861	XP_014010586.1	PREDICTED: lysophospholipid acyltransferase 7 isoform X1 [Salmo salar]
Hk_0001150	105	9.65436e-69	XP_014057125.1	PREDICTED: mpv17-like protein isoform X1 [Salmo salar]	100	XP_014010730.1	PREDICTED: 60S ribosomal protein L18-like [Salmo salar]	100	XP_014010730.1	PREDICTED: 60S ribosomal protein L18-like [Salmo salar]	172	XP_014043601.1	PREDICTED: uncharacterized protein LOC106596876, partial [Salmo salar]	146.362	XP_014057125.1	PREDICTED: mpv17-like protein isoform X1 [Salmo salar]
Hk_0001151	105	9.64702e-69	XP_014057125.1	PREDICTED: mpv17-like protein isoform X1 [Salmo salar]	100	XP_014010730.1	PREDICTED: 60S ribosomal protein L18-like [Salmo salar]	100	XP_014010730.1	PREDICTED: 60S ribosomal protein L18-like [Salmo salar]	172	XP_014043601.1	PREDICTED: uncharacterized protein LOC106596876, partial [Salmo salar]	146.362	XP_014057125.1	PREDICTED: mpv17-like protein isoform X1 [Salmo salar]
Hk_0001152	153	1.50742e-176	ABV31710.1	transposase [Salmo salar]	100	XP_014010730.1	PREDICTED: 60S ribosomal protein L18-like [Salmo salar]	100	XP_014010730.1	PREDICTED: 60S ribosomal protein L18-like [Salmo salar]	251	ACH85309.1	transposase-like [Salmo salar]	463.381	ABV31710.1	transposase [Salmo salar]
Hk_0001153	124	8.04681e-132	XP_014010809.1	PREDICTED: adenosine receptor A1-like [Salmo salar]	100	XP_014010809.1	PREDICTED: adenosine receptor A1-like [Salmo salar]	100	XP_014010809.1	PREDICTED: adenosine receptor A1-like [Salmo salar]	276	XP_014057045.1	PREDICTED: adenosine receptor A1-like [Salmo salar]	421.779	XP_014010809.1	PREDICTED: adenosine receptor A1-like [Salmo salar]
Hk_0001154	124	8.01062e-132	XP_014010809.1	PREDICTED: adenosine receptor A1-like [Salmo salar]	100	XP_014010809.1	PREDICTED: adenosine receptor A1-like [Salmo salar]	100	XP_014010809.1	PREDICTED: adenosine receptor A1-like [Salmo salar]	276	XP_014057045.1	PREDICTED: adenosine receptor A1-like [Salmo salar]	421.779	XP_014010809.1	PREDICTED: adenosine receptor A1-like [Salmo salar]
Hk_0001155	124	8.01187e-132	XP_014010809.1	PREDICTED: adenosine receptor A1-like [Salmo salar]	100	XP_014010809.1	PREDICTED: adenosine receptor A1-like [Salmo salar]	100	XP_014010809.1	PREDICTED: adenosine receptor A1-like [Salmo salar]	276	XP_014057045.1	PREDICTED: adenosine receptor A1-like [Salmo salar]	421.779	XP_014010809.1	PREDICTED: adenosine receptor A1-like [Salmo salar]
Hk_0001156	455	3.51367e-43	XP_014012019.1	PREDICTED: urokinase plasminogen activator surface receptor-like [Salmo salar]	100	XP_014012019.1	PREDICTED: urokinase plasminogen activator surface receptor-like [Salmo salar]	100	XP_014012019.1	PREDICTED: urokinase plasminogen activator surface receptor-like [Salmo salar]	308	ACH85309.1	transposase-like [Salmo salar]	161.77	XP_014012019.1	PREDICTED: urokinase plasminogen activator surface receptor-like [Salmo salar]
Hk_0001157	462	1.48952e-43	XP_014012019.1	PREDICTED: urokinase plasminogen activator surface receptor-like [Salmo salar]	100	XP_014012019.1	PREDICTED: urokinase plasminogen activator surface receptor-like [Salmo salar]	100	XP_014012019.1	PREDICTED: urokinase plasminogen activator surface receptor-like [Salmo salar]	308	ACH85309.1	transposase-like [Salmo salar]	162.925	XP_014012019.1	PREDICTED: urokinase plasminogen activator surface receptor-like [Salmo salar]
Hk_0001158	459	1.50391e-43	XP_014012019.1	PREDICTED: urokinase plasminogen activator surface receptor-like [Salmo salar]	100	XP_014012019.1	PREDICTED: urokinase plasminogen activator surface receptor-like [Salmo salar]	100	XP_014012019.1	PREDICTED: urokinase plasminogen activator surface receptor-like [Salmo salar]	308	ACH85309.1	transposase-like [Salmo salar]	162.925	XP_014012019.1	PREDICTED: urokinase plasminogen activator surface receptor-like [Salmo salar]
Hk_0001159	220	3.89025e-43	XP_014021849.1	PREDICTED: dehydrodolichyl diphosphate syntase complex subunit DHDDS-like [Salmo salar]	100	XP_014021849.1	PREDICTED: dehydrodolichyl diphosphate syntase complex subunit DHDDS-like [Salmo salar]	100	XP_014021849.1	PREDICTED: dehydrodolichyl diphosphate syntase complex subunit DHDDS-like [Salmo salar]	281	ACI66028.1	Transposable element Tcb1 transposase [Salmo salar]	165.236	XP_014021849.1	PREDICTED: dehydrodolichyl diphosphate syntase complex subunit DHDDS-like [Salmo salar]
Hk_0001160	179	3.88059e-43	XP_014021849.1	PREDICTED: dehydrodolichyl diphosphate syntase complex subunit DHDDS-like [Salmo salar]	100	XP_014021849.1	PREDICTED: dehydrodolichyl diphosphate syntase complex subunit DHDDS-like [Salmo salar]	100	XP_014021849.1	PREDICTED: dehydrodolichyl diphosphate syntase complex subunit DHDDS-like [Salmo salar]	281	ACI66028.1	Transposable element Tcb1 transposase [Salmo salar]	165.236	XP_014021849.1	PREDICTED: dehydrodolichyl diphosphate syntase complex subunit DHDDS-like [Salmo salar]
Hk_0001161	179	3.88119e-43	XP_014021849.1	PREDICTED: dehydrodolichyl diphosphate syntase complex subunit DHDDS-like [Salmo salar]	100	XP_014021849.1	PREDICTED: dehydrodolichyl diphosphate syntase complex subunit DHDDS-like [Salmo salar]	100	XP_014021849.1	PREDICTED: dehydrodolichyl diphosphate syntase complex subunit DHDDS-like [Salmo salar]	281	ACI66028.1	Transposable element Tcb1 transposase [Salmo salar]	165.236	XP_014021849.1	PREDICTED: dehydrodolichyl diphosphate syntase complex subunit DHDDS-like [Salmo salar]
Hk_0001162	180	3.9863e-43	XP_014021849.1	PREDICTED: dehydrodolichyl diphosphate syntase complex subunit DHDDS-like [Salmo salar]	100	XP_014021849.1	PREDICTED: dehydrodolichyl diphosphate syntase complex subunit DHDDS-like [Salmo salar]	100	XP_014021849.1	PREDICTED: dehydrodolichyl diphosphate syntase complex subunit DHDDS-like [Salmo salar]	281	ACI66028.1	Transposable element Tcb1 transposase [Salmo salar]	165.236	XP_014021849.1	PREDICTED: dehydrodolichyl diphosphate syntase complex subunit DHDDS-like [Salmo salar]
Hk_0001163	383	7.44962e-172	ACN60195.1	Retrotransposable element Tf2 155 kDa protein type 3, partial [Salmo salar]	100	XP_013983690.1	PREDICTED: uncharacterized protein LOC106563021 isoform X1 [Salmo salar]	100	XP_013983690.1	PREDICTED: uncharacterized protein LOC106563021 isoform X1 [Salmo salar]	457	XP_013996969.1	PREDICTED: uncharacterized protein K02A2.6-like [Salmo salar]	546.969	ACN60195.1	Retrotransposable element Tf2 155 kDa protein type 3, partial [Salmo salar]
Hk_0001164	185	1.46141e-71	XP_014055658.1	PREDICTED: uncharacterized protein LOC106604990, partial [Salmo salar]	100	XP_013983690.1	PREDICTED: uncharacterized protein LOC106563021 isoform X1 [Salmo salar]	100	XP_013983690.1	PREDICTED: uncharacterized protein LOC106563021 isoform X1 [Salmo salar]	252	XP_013991921.1	PREDICTED: uncharacterized protein LOC106567309 [Salmo salar]	247.284	XP_014055658.1	PREDICTED: uncharacterized protein LOC106604990, partial [Salmo salar]
Hk_0001165	191	3.96589e-94	XP_014032231.1	PREDICTED: nicotinate-nucleotide pyrophosphorylase [carboxylating]-like isoform X1 [Salmo salar]	100	XP_014032231.1	PREDICTED: nicotinate-nucleotide pyrophosphorylase [carboxylating]-like isoform X1 [Salmo salar]	100	XP_014032231.1	PREDICTED: nicotinate-nucleotide pyrophosphorylase [carboxylating]-like isoform X1 [Salmo salar]	185	ACH85309.1	transposase-like [Salmo salar]	317.775	XP_014032231.1	PREDICTED: nicotinate-nucleotide pyrophosphorylase [carboxylating]-like isoform X1 [Salmo salar]
Hk_0001166	178	4.2753e-68	XP_013986945.1	PREDICTED: nicotinate-nucleotide pyrophosphorylase [carboxylating]-like isoform X2 [Salmo salar]	100	XP_014032232.1	PREDICTED: nicotinate-nucleotide pyrophosphorylase [carboxylating]-like isoform X2 [Salmo salar]	100	XP_014032232.1	PREDICTED: nicotinate-nucleotide pyrophosphorylase [carboxylating]-like isoform X2 [Salmo salar]	185	ACH85309.1	transposase-like [Salmo salar]	233.802	XP_013986945.1	PREDICTED: nicotinate-nucleotide pyrophosphorylase [carboxylating]-like isoform X2 [Salmo salar]
Hk_0001167	178	4.33041e-68	XP_013986945.1	PREDICTED: nicotinate-nucleotide pyrophosphorylase [carboxylating]-like isoform X2 [Salmo salar]	100	XP_014032232.1	PREDICTED: nicotinate-nucleotide pyrophosphorylase [carboxylating]-like isoform X2 [Salmo salar]	100	XP_014032232.1	PREDICTED: nicotinate-nucleotide pyrophosphorylase [carboxylating]-like isoform X2 [Salmo salar]	185	ACH85309.1	transposase-like [Salmo salar]	233.802	XP_013986945.1	PREDICTED: nicotinate-nucleotide pyrophosphorylase [carboxylating]-like isoform X2 [Salmo salar]
Hk_0001168	797	0	XP_014047661.1	PREDICTED: uncharacterized protein LOC106600668 [Salmo salar]	95.8333	XP_013989439.1	PREDICTED: uncharacterized protein LOC106566110 [Salmo salar]	98.7097	XP_013994913.1	PREDICTED: uncharacterized protein LOC106568774 [Salmo salar]	989	XP_014047661.1	PREDICTED: uncharacterized protein LOC106600668 [Salmo salar]	1816.59	XP_014047661.1	PREDICTED: uncharacterized protein LOC106600668 [Salmo salar]
Hk_0001169	306	1.7813e-70	ACN10574.1	40S ribosomal protein SA [Salmo salar]	100	ACN10574.1	40S ribosomal protein SA [Salmo salar]	100	ACN10574.1	40S ribosomal protein SA [Salmo salar]	117	ACN10574.1	40S ribosomal protein SA [Salmo salar]	238.424	ACN10574.1	40S ribosomal protein SA [Salmo salar]
Hk_0001170	310	1.77318e-70	ACN10574.1	40S ribosomal protein SA [Salmo salar]	100	ACN10574.1	40S ribosomal protein SA [Salmo salar]	100	ACN10574.1	40S ribosomal protein SA [Salmo salar]	117	ACN10574.1	40S ribosomal protein SA [Salmo salar]	238.424	ACN10574.1	40S ribosomal protein SA [Salmo salar]
Hk_0001171	310	1.77426e-70	ACN10574.1	40S ribosomal protein SA [Salmo salar]	100	ACN10574.1	40S ribosomal protein SA [Salmo salar]	100	ACN10574.1	40S ribosomal protein SA [Salmo salar]	117	ACN10574.1	40S ribosomal protein SA [Salmo salar]	238.424	ACN10574.1	40S ribosomal protein SA [Salmo salar]
Hk_0001172	175	3.31535e-48	XP_014034376.1	PREDICTED: carboxylesterase notum2-like, partial [Salmo salar]	100	XP_014034376.1	PREDICTED: carboxylesterase notum2-like, partial [Salmo salar]	100	XP_014034376.1	PREDICTED: carboxylesterase notum2-like, partial [Salmo salar]	155	ABV31711.1	transposase [Salmo salar]	179.489	XP_013986213.1	PREDICTED: carboxylesterase notum2-like isoform X1 [Salmo salar]
Hk_0001173	171	3.31187e-48	XP_014034376.1	PREDICTED: carboxylesterase notum2-like, partial [Salmo salar]	100	XP_014034376.1	PREDICTED: carboxylesterase notum2-like, partial [Salmo salar]	100	XP_014034376.1	PREDICTED: carboxylesterase notum2-like, partial [Salmo salar]	155	ABV31711.1	transposase [Salmo salar]	179.489	XP_013986213.1	PREDICTED: carboxylesterase notum2-like isoform X1 [Salmo salar]
Hk_0001174	164	3.31038e-48	XP_014034376.1	PREDICTED: carboxylesterase notum2-like, partial [Salmo salar]	100	XP_014034376.1	PREDICTED: carboxylesterase notum2-like, partial [Salmo salar]	100	XP_014034376.1	PREDICTED: carboxylesterase notum2-like, partial [Salmo salar]	155	ABV31711.1	transposase [Salmo salar]	179.489	XP_013986213.1	PREDICTED: carboxylesterase notum2-like isoform X1 [Salmo salar]
Hk_0001175	127	3.31088e-48	XP_014034376.1	PREDICTED: carboxylesterase notum2-like, partial [Salmo salar]	100	XP_014034376.1	PREDICTED: carboxylesterase notum2-like, partial [Salmo salar]	100	XP_014034376.1	PREDICTED: carboxylesterase notum2-like, partial [Salmo salar]	155	ABV31711.1	transposase [Salmo salar]	179.489	XP_013986213.1	PREDICTED: carboxylesterase notum2-like isoform X1 [Salmo salar]
Hk_0001176	834	1.50324e-61	ABV31710.1	transposase [Salmo salar]	100	NP_001266041.1	complement factor D (adipsin) [Salmo salar]	100	NP_001266041.1	complement factor D (adipsin) [Salmo salar]	313	XP_014057418.1	PREDICTED: uncharacterized protein LOC106605939 [Salmo salar]	183.726	NP_001266041.1	complement factor D (adipsin) [Salmo salar]
Hk_0001177	831	2.72831e-72	ABV31710.1	transposase [Salmo salar]	100	NP_001266041.1	complement factor D (adipsin) [Salmo salar]	100	NP_001266041.1	complement factor D (adipsin) [Salmo salar]	313	XP_014057418.1	PREDICTED: uncharacterized protein LOC106605939 [Salmo salar]	187.963	ACM09793.1	Transposable element Tc1 transposase [Salmo salar]
Hk_0001178	830	2.74886e-72	ABV31710.1	transposase [Salmo salar]	100	NP_001266041.1	complement factor D (adipsin) [Salmo salar]	100	NP_001266041.1	complement factor D (adipsin) [Salmo salar]	313	XP_014057418.1	PREDICTED: uncharacterized protein LOC106605939 [Salmo salar]	187.963	ACM09793.1	Transposable element Tc1 transposase [Salmo salar]
Hk_0001179	827	2.80352e-72	ABV31710.1	transposase [Salmo salar]	100	NP_001266041.1	complement factor D (adipsin) [Salmo salar]	100	NP_001266041.1	complement factor D (adipsin) [Salmo salar]	313	XP_014057418.1	PREDICTED: uncharacterized protein LOC106605939 [Salmo salar]	187.963	ACM09793.1	Transposable element Tc1 transposase [Salmo salar]
Hk_0001180	481	1.05304e-114	XP_014042641.1	PREDICTED: actin, cytoplasmic 1-like [Salmo salar]	100	XP_014042641.1	PREDICTED: actin, cytoplasmic 1-like [Salmo salar]	100	XP_014042641.1	PREDICTED: actin, cytoplasmic 1-like [Salmo salar]	544	XP_014043956.1	PREDICTED: apolipoprotein B-100-like [Salmo salar]	308.916	XP_014042641.1	PREDICTED: actin, cytoplasmic 1-like [Salmo salar]
Hk_0001181	481	1.05977e-114	XP_014042641.1	PREDICTED: actin, cytoplasmic 1-like [Salmo salar]	100	XP_014042641.1	PREDICTED: actin, cytoplasmic 1-like [Salmo salar]	100	XP_014042641.1	PREDICTED: actin, cytoplasmic 1-like [Salmo salar]	544	XP_014043956.1	PREDICTED: apolipoprotein B-100-like [Salmo salar]	308.916	XP_014042641.1	PREDICTED: actin, cytoplasmic 1-like [Salmo salar]
Hk_0001182	480	1.06234e-114	XP_014042641.1	PREDICTED: actin, cytoplasmic 1-like [Salmo salar]	100	XP_014042641.1	PREDICTED: actin, cytoplasmic 1-like [Salmo salar]	100	XP_014042641.1	PREDICTED: actin, cytoplasmic 1-like [Salmo salar]	544	XP_014043956.1	PREDICTED: apolipoprotein B-100-like [Salmo salar]	308.916	XP_014042641.1	PREDICTED: actin, cytoplasmic 1-like [Salmo salar]
Hk_0001183	463	1.0532e-114	XP_014042641.1	PREDICTED: actin, cytoplasmic 1-like [Salmo salar]	100	XP_014042641.1	PREDICTED: actin, cytoplasmic 1-like [Salmo salar]	100	XP_014042641.1	PREDICTED: actin, cytoplasmic 1-like [Salmo salar]	544	XP_014043956.1	PREDICTED: apolipoprotein B-100-like [Salmo salar]	308.916	XP_014042641.1	PREDICTED: actin, cytoplasmic 1-like [Salmo salar]
Hk_0001184	463	1.05881e-114	XP_014042641.1	PREDICTED: actin, cytoplasmic 1-like [Salmo salar]	100	XP_014042641.1	PREDICTED: actin, cytoplasmic 1-like [Salmo salar]	100	XP_014042641.1	PREDICTED: actin, cytoplasmic 1-like [Salmo salar]	544	XP_014043956.1	PREDICTED: apolipoprotein B-100-like [Salmo salar]	308.916	XP_014042641.1	PREDICTED: actin, cytoplasmic 1-like [Salmo salar]
Hk_0001185	484	1.05064e-114	XP_014042641.1	PREDICTED: actin, cytoplasmic 1-like [Salmo salar]	100	XP_014042641.1	PREDICTED: actin, cytoplasmic 1-like [Salmo salar]	100	XP_014042641.1	PREDICTED: actin, cytoplasmic 1-like [Salmo salar]	544	XP_014043956.1	PREDICTED: apolipoprotein B-100-like [Salmo salar]	308.916	XP_014042641.1	PREDICTED: actin, cytoplasmic 1-like [Salmo salar]
Hk_0001186	484	1.0625e-114	XP_014042641.1	PREDICTED: actin, cytoplasmic 1-like [Salmo salar]	100	XP_014042641.1	PREDICTED: actin, cytoplasmic 1-like [Salmo salar]	100	XP_014042641.1	PREDICTED: actin, cytoplasmic 1-like [Salmo salar]	544	XP_014043956.1	PREDICTED: apolipoprotein B-100-like [Salmo salar]	308.916	XP_014042641.1	PREDICTED: actin, cytoplasmic 1-like [Salmo salar]
Hk_0001187	488	1.05048e-114	XP_014042641.1	PREDICTED: actin, cytoplasmic 1-like [Salmo salar]	100	XP_014042641.1	PREDICTED: actin, cytoplasmic 1-like [Salmo salar]	100	XP_014042641.1	PREDICTED: actin, cytoplasmic 1-like [Salmo salar]	544	XP_014043956.1	PREDICTED: apolipoprotein B-100-like [Salmo salar]	308.916	XP_014042641.1	PREDICTED: actin, cytoplasmic 1-like [Salmo salar]
Hk_0001188	191	2.61957e-34	XP_014010594.1	PREDICTED: lysophospholipid acyltransferase 7 isoform X2 [Salmo salar]	100	XP_014010594.1	PREDICTED: lysophospholipid acyltransferase 7 isoform X2 [Salmo salar]	100	XP_014010594.1	PREDICTED: lysophospholipid acyltransferase 7 isoform X2 [Salmo salar]	261	ACH85309.1	transposase-like [Salmo salar]	143.28	XP_014010594.1	PREDICTED: lysophospholipid acyltransferase 7 isoform X2 [Salmo salar]
Hk_0001189	196	2.62539e-34	XP_014010594.1	PREDICTED: lysophospholipid acyltransferase 7 isoform X2 [Salmo salar]	100	XP_014010594.1	PREDICTED: lysophospholipid acyltransferase 7 isoform X2 [Salmo salar]	100	XP_014010594.1	PREDICTED: lysophospholipid acyltransferase 7 isoform X2 [Salmo salar]	261	ACH85309.1	transposase-like [Salmo salar]	143.28	XP_014010594.1	PREDICTED: lysophospholipid acyltransferase 7 isoform X2 [Salmo salar]
Hk_0001190	203	6.9264e-61	XP_014010586.1	PREDICTED: lysophospholipid acyltransferase 7 isoform X1 [Salmo salar]	100	XP_014010586.1	PREDICTED: lysophospholipid acyltransferase 7 isoform X1 [Salmo salar]	100	XP_014010586.1	PREDICTED: lysophospholipid acyltransferase 7 isoform X1 [Salmo salar]	261	ACH85309.1	transposase-like [Salmo salar]	221.861	XP_014010586.1	PREDICTED: lysophospholipid acyltransferase 7 isoform X1 [Salmo salar]
Hk_0001191	105	9.65436e-69	XP_014057125.1	PREDICTED: mpv17-like protein isoform X1 [Salmo salar]	100	XP_014010730.1	PREDICTED: 60S ribosomal protein L18-like [Salmo salar]	100	XP_014010730.1	PREDICTED: 60S ribosomal protein L18-like [Salmo salar]	172	XP_014043601.1	PREDICTED: uncharacterized protein LOC106596876, partial [Salmo salar]	146.362	XP_014057125.1	PREDICTED: mpv17-like protein isoform X1 [Salmo salar]
Hk_0001192	105	9.64262e-69	XP_014057125.1	PREDICTED: mpv17-like protein isoform X1 [Salmo salar]	100	XP_014010730.1	PREDICTED: 60S ribosomal protein L18-like [Salmo salar]	100	XP_014010730.1	PREDICTED: 60S ribosomal protein L18-like [Salmo salar]	172	XP_014043601.1	PREDICTED: uncharacterized protein LOC106596876, partial [Salmo salar]	146.362	XP_014057125.1	PREDICTED: mpv17-like protein isoform X1 [Salmo salar]
Hk_0001193	153	1.50857e-176	ABV31710.1	transposase [Salmo salar]	100	XP_014010730.1	PREDICTED: 60S ribosomal protein L18-like [Salmo salar]	100	XP_014010730.1	PREDICTED: 60S ribosomal protein L18-like [Salmo salar]	251	ACH85309.1	transposase-like [Salmo salar]	463.381	ABV31710.1	transposase [Salmo salar]
Hk_0001194	124	8.04431e-132	XP_014010809.1	PREDICTED: adenosine receptor A1-like [Salmo salar]	100	XP_014010809.1	PREDICTED: adenosine receptor A1-like [Salmo salar]	100	XP_014010809.1	PREDICTED: adenosine receptor A1-like [Salmo salar]	276	XP_014057045.1	PREDICTED: adenosine receptor A1-like [Salmo salar]	421.779	XP_014010809.1	PREDICTED: adenosine receptor A1-like [Salmo salar]
Hk_0001195	124	8.01187e-132	XP_014010809.1	PREDICTED: adenosine receptor A1-like [Salmo salar]	100	XP_014010809.1	PREDICTED: adenosine receptor A1-like [Salmo salar]	100	XP_014010809.1	PREDICTED: adenosine receptor A1-like [Salmo salar]	276	XP_014057045.1	PREDICTED: adenosine receptor A1-like [Salmo salar]	421.779	XP_014010809.1	PREDICTED: adenosine receptor A1-like [Salmo salar]
Hk_0001196	124	8.00812e-132	XP_014010809.1	PREDICTED: adenosine receptor A1-like [Salmo salar]	100	XP_014010809.1	PREDICTED: adenosine receptor A1-like [Salmo salar]	100	XP_014010809.1	PREDICTED: adenosine receptor A1-like [Salmo salar]	276	XP_014057045.1	PREDICTED: adenosine receptor A1-like [Salmo salar]	421.779	XP_014010809.1	PREDICTED: adenosine receptor A1-like [Salmo salar]
Hk_0001197	459	3.51852e-43	XP_014012019.1	PREDICTED: urokinase plasminogen activator surface receptor-like [Salmo salar]	100	XP_014012019.1	PREDICTED: urokinase plasminogen activator surface receptor-like [Salmo salar]	100	XP_014012019.1	PREDICTED: urokinase plasminogen activator surface receptor-like [Salmo salar]	308	ACH85309.1	transposase-like [Salmo salar]	161.77	XP_014012019.1	PREDICTED: urokinase plasminogen activator surface receptor-like [Salmo salar]
Hk_0001198	462	1.49181e-43	XP_014012019.1	PREDICTED: urokinase plasminogen activator surface receptor-like [Salmo salar]	100	XP_014012019.1	PREDICTED: urokinase plasminogen activator surface receptor-like [Salmo salar]	100	XP_014012019.1	PREDICTED: urokinase plasminogen activator surface receptor-like [Salmo salar]	308	ACH85309.1	transposase-like [Salmo salar]	162.925	XP_014012019.1	PREDICTED: urokinase plasminogen activator surface receptor-like [Salmo salar]
Hk_0001199	459	1.48701e-43	XP_014012019.1	PREDICTED: urokinase plasminogen activator surface receptor-like [Salmo salar]	100	XP_014012019.1	PREDICTED: urokinase plasminogen activator surface receptor-like [Salmo salar]	100	XP_014012019.1	PREDICTED: urokinase plasminogen activator surface receptor-like [Salmo salar]	308	ACH85309.1	transposase-like [Salmo salar]	162.925	XP_014012019.1	PREDICTED: urokinase plasminogen activator surface receptor-like [Salmo salar]
Hk_0001200	458	1.50528e-43	XP_014012019.1	PREDICTED: urokinase plasminogen activator surface receptor-like [Salmo salar]	100	XP_014012019.1	PREDICTED: urokinase plasminogen activator surface receptor-like [Salmo salar]	100	XP_014012019.1	PREDICTED: urokinase plasminogen activator surface receptor-like [Salmo salar]	308	ACH85309.1	transposase-like [Salmo salar]	162.925	XP_014012019.1	PREDICTED: urokinase plasminogen activator surface receptor-like [Salmo salar]
Hk_0001201	220	3.88965e-43	XP_014021849.1	PREDICTED: dehydrodolichyl diphosphate syntase complex subunit DHDDS-like [Salmo salar]	100	XP_014021849.1	PREDICTED: dehydrodolichyl diphosphate syntase complex subunit DHDDS-like [Salmo salar]	100	XP_014021849.1	PREDICTED: dehydrodolichyl diphosphate syntase complex subunit DHDDS-like [Salmo salar]	281	ACI66028.1	Transposable element Tcb1 transposase [Salmo salar]	165.236	XP_014021849.1	PREDICTED: dehydrodolichyl diphosphate syntase complex subunit DHDDS-like [Salmo salar]
Hk_0001202	179	3.88059e-43	XP_014021849.1	PREDICTED: dehydrodolichyl diphosphate syntase complex subunit DHDDS-like [Salmo salar]	100	XP_014021849.1	PREDICTED: dehydrodolichyl diphosphate syntase complex subunit DHDDS-like [Salmo salar]	100	XP_014021849.1	PREDICTED: dehydrodolichyl diphosphate syntase complex subunit DHDDS-like [Salmo salar]	281	ACI66028.1	Transposable element Tcb1 transposase [Salmo salar]	165.236	XP_014021849.1	PREDICTED: dehydrodolichyl diphosphate syntase complex subunit DHDDS-like [Salmo salar]
Hk_0001203	179	3.88119e-43	XP_014021849.1	PREDICTED: dehydrodolichyl diphosphate syntase complex subunit DHDDS-like [Salmo salar]	100	XP_014021849.1	PREDICTED: dehydrodolichyl diphosphate syntase complex subunit DHDDS-like [Salmo salar]	100	XP_014021849.1	PREDICTED: dehydrodolichyl diphosphate syntase complex subunit DHDDS-like [Salmo salar]	281	ACI66028.1	Transposable element Tcb1 transposase [Salmo salar]	165.236	XP_014021849.1	PREDICTED: dehydrodolichyl diphosphate syntase complex subunit DHDDS-like [Salmo salar]
Hk_0001204	180	3.9863e-43	XP_014021849.1	PREDICTED: dehydrodolichyl diphosphate syntase complex subunit DHDDS-like [Salmo salar]	100	XP_014021849.1	PREDICTED: dehydrodolichyl diphosphate syntase complex subunit DHDDS-like [Salmo salar]	100	XP_014021849.1	PREDICTED: dehydrodolichyl diphosphate syntase complex subunit DHDDS-like [Salmo salar]	281	ACI66028.1	Transposable element Tcb1 transposase [Salmo salar]	165.236	XP_014021849.1	PREDICTED: dehydrodolichyl diphosphate syntase complex subunit DHDDS-like [Salmo salar]
Hk_0001205	255	5.71562e-47	ACN11475.1	Transposable element Tcb1 transposase [Salmo salar]	100	ACN10411.1	28S ribosomal protein S15, mitochondrial precursor [Salmo salar]	100	ACN10411.1	28S ribosomal protein S15, mitochondrial precursor [Salmo salar]	271	ACH85309.1	transposase-like [Salmo salar]	172.94	ACN11475.1	Transposable element Tcb1 transposase [Salmo salar]
Hk_0001206	384	7.41723e-172	ACN60195.1	Retrotransposable element Tf2 155 kDa protein type 3, partial [Salmo salar]	100	XP_013983690.1	PREDICTED: uncharacterized protein LOC106563021 isoform X1 [Salmo salar]	100	XP_013983690.1	PREDICTED: uncharacterized protein LOC106563021 isoform X1 [Salmo salar]	457	XP_013996969.1	PREDICTED: uncharacterized protein K02A2.6-like [Salmo salar]	546.969	ACN60195.1	Retrotransposable element Tf2 155 kDa protein type 3, partial [Salmo salar]
Hk_0001207	383	7.43642e-172	ACN60195.1	Retrotransposable element Tf2 155 kDa protein type 3, partial [Salmo salar]	100	XP_013983690.1	PREDICTED: uncharacterized protein LOC106563021 isoform X1 [Salmo salar]	100	XP_013983690.1	PREDICTED: uncharacterized protein LOC106563021 isoform X1 [Salmo salar]	457	XP_013996969.1	PREDICTED: uncharacterized protein K02A2.6-like [Salmo salar]	546.969	ACN60195.1	Retrotransposable element Tf2 155 kDa protein type 3, partial [Salmo salar]
Hk_0001208	191	3.96274e-94	XP_014032231.1	PREDICTED: nicotinate-nucleotide pyrophosphorylase [carboxylating]-like isoform X1 [Salmo salar]	100	XP_014032231.1	PREDICTED: nicotinate-nucleotide pyrophosphorylase [carboxylating]-like isoform X1 [Salmo salar]	100	XP_014032231.1	PREDICTED: nicotinate-nucleotide pyrophosphorylase [carboxylating]-like isoform X1 [Salmo salar]	185	ACH85309.1	transposase-like [Salmo salar]	317.775	XP_014032231.1	PREDICTED: nicotinate-nucleotide pyrophosphorylase [carboxylating]-like isoform X1 [Salmo salar]
Hk_0001209	191	3.96715e-94	XP_014032231.1	PREDICTED: nicotinate-nucleotide pyrophosphorylase [carboxylating]-like isoform X1 [Salmo salar]	100	XP_014032231.1	PREDICTED: nicotinate-nucleotide pyrophosphorylase [carboxylating]-like isoform X1 [Salmo salar]	100	XP_014032231.1	PREDICTED: nicotinate-nucleotide pyrophosphorylase [carboxylating]-like isoform X1 [Salmo salar]	185	ACH85309.1	transposase-like [Salmo salar]	317.775	XP_014032231.1	PREDICTED: nicotinate-nucleotide pyrophosphorylase [carboxylating]-like isoform X1 [Salmo salar]
Hk_0001210	178	4.34091e-68	XP_013986945.1	PREDICTED: nicotinate-nucleotide pyrophosphorylase [carboxylating]-like isoform X2 [Salmo salar]	100	XP_014032232.1	PREDICTED: nicotinate-nucleotide pyrophosphorylase [carboxylating]-like isoform X2 [Salmo salar]	100	XP_014032232.1	PREDICTED: nicotinate-nucleotide pyrophosphorylase [carboxylating]-like isoform X2 [Salmo salar]	185	ACH85309.1	transposase-like [Salmo salar]	233.802	XP_013986945.1	PREDICTED: nicotinate-nucleotide pyrophosphorylase [carboxylating]-like isoform X2 [Salmo salar]
Hk_0001211	797	0	XP_014047661.1	PREDICTED: uncharacterized protein LOC106600668 [Salmo salar]	95.8333	XP_013989439.1	PREDICTED: uncharacterized protein LOC106566110 [Salmo salar]	98.7097	XP_013994913.1	PREDICTED: uncharacterized protein LOC106568774 [Salmo salar]	989	XP_014047661.1	PREDICTED: uncharacterized protein LOC106600668 [Salmo salar]	1816.59	XP_014047661.1	PREDICTED: uncharacterized protein LOC106600668 [Salmo salar]
Hk_0001212	310	1.78915e-70	ACN10574.1	40S ribosomal protein SA [Salmo salar]	100	ACN10574.1	40S ribosomal protein SA [Salmo salar]	100	ACN10574.1	40S ribosomal protein SA [Salmo salar]	117	ACN10574.1	40S ribosomal protein SA [Salmo salar]	238.424	ACN10574.1	40S ribosomal protein SA [Salmo salar]
Hk_0001213	171	3.32031e-48	XP_014034376.1	PREDICTED: carboxylesterase notum2-like, partial [Salmo salar]	100	XP_014034376.1	PREDICTED: carboxylesterase notum2-like, partial [Salmo salar]	100	XP_014034376.1	PREDICTED: carboxylesterase notum2-like, partial [Salmo salar]	155	ABV31711.1	transposase [Salmo salar]	179.489	XP_013986213.1	PREDICTED: carboxylesterase notum2-like isoform X1 [Salmo salar]
Hk_0001214	171	3.31287e-48	XP_014034376.1	PREDICTED: carboxylesterase notum2-like, partial [Salmo salar]	100	XP_014034376.1	PREDICTED: carboxylesterase notum2-like, partial [Salmo salar]	100	XP_014034376.1	PREDICTED: carboxylesterase notum2-like, partial [Salmo salar]	155	ABV31711.1	transposase [Salmo salar]	179.489	XP_013986213.1	PREDICTED: carboxylesterase notum2-like isoform X1 [Salmo salar]
Hk_0001215	164	3.31435e-48	XP_014034376.1	PREDICTED: carboxylesterase notum2-like, partial [Salmo salar]	100	XP_014034376.1	PREDICTED: carboxylesterase notum2-like, partial [Salmo salar]	100	XP_014034376.1	PREDICTED: carboxylesterase notum2-like, partial [Salmo salar]	155	ABV31711.1	transposase [Salmo salar]	179.489	XP_013986213.1	PREDICTED: carboxylesterase notum2-like isoform X1 [Salmo salar]
Hk_0001216	127	3.31138e-48	XP_014034376.1	PREDICTED: carboxylesterase notum2-like, partial [Salmo salar]	100	XP_014034376.1	PREDICTED: carboxylesterase notum2-like, partial [Salmo salar]	100	XP_014034376.1	PREDICTED: carboxylesterase notum2-like, partial [Salmo salar]	155	ABV31711.1	transposase [Salmo salar]	179.489	XP_013986213.1	PREDICTED: carboxylesterase notum2-like isoform X1 [Salmo salar]
Hk_0001217	834	1.48031e-61	ABV31710.1	transposase [Salmo salar]	100	NP_001266041.1	complement factor D (adipsin) [Salmo salar]	100	NP_001266041.1	complement factor D (adipsin) [Salmo salar]	313	XP_014057418.1	PREDICTED: uncharacterized protein LOC106605939 [Salmo salar]	183.726	NP_001266041.1	complement factor D (adipsin) [Salmo salar]
Hk_0001218	831	2.73036e-72	ABV31710.1	transposase [Salmo salar]	100	NP_001266041.1	complement factor D (adipsin) [Salmo salar]	100	NP_001266041.1	complement factor D (adipsin) [Salmo salar]	313	XP_014057418.1	PREDICTED: uncharacterized protein LOC106605939 [Salmo salar]	187.963	ACM09793.1	Transposable element Tc1 transposase [Salmo salar]
Hk_0001219	830	2.74927e-72	ABV31710.1	transposase [Salmo salar]	100	NP_001266041.1	complement factor D (adipsin) [Salmo salar]	100	NP_001266041.1	complement factor D (adipsin) [Salmo salar]	313	XP_014057418.1	PREDICTED: uncharacterized protein LOC106605939 [Salmo salar]	187.963	ACM09793.1	Transposable element Tc1 transposase [Salmo salar]
Hk_0001220	827	2.80352e-72	ABV31710.1	transposase [Salmo salar]	100	NP_001266041.1	complement factor D (adipsin) [Salmo salar]	100	NP_001266041.1	complement factor D (adipsin) [Salmo salar]	313	XP_014057418.1	PREDICTED: uncharacterized protein LOC106605939 [Salmo salar]	187.963	ACM09793.1	Transposable element Tc1 transposase [Salmo salar]
Hk_0001221	810	2.72378e-72	ABV31710.1	transposase [Salmo salar]	100	NP_001266041.1	complement factor D (adipsin) [Salmo salar]	100	NP_001266041.1	complement factor D (adipsin) [Salmo salar]	261	XP_014064987.1	PREDICTED: uncharacterized protein LOC106610263 [Salmo salar]	187.963	ACM09793.1	Transposable element Tc1 transposase [Salmo salar]
Hk_0001222	480	1.05352e-114	XP_014042641.1	PREDICTED: actin, cytoplasmic 1-like [Salmo salar]	100	XP_014042641.1	PREDICTED: actin, cytoplasmic 1-like [Salmo salar]	100	XP_014042641.1	PREDICTED: actin, cytoplasmic 1-like [Salmo salar]	544	XP_014043956.1	PREDICTED: apolipoprotein B-100-like [Salmo salar]	308.916	XP_014042641.1	PREDICTED: actin, cytoplasmic 1-like [Salmo salar]
Hk_0001223	481	1.05945e-114	XP_014042641.1	PREDICTED: actin, cytoplasmic 1-like [Salmo salar]	100	XP_014042641.1	PREDICTED: actin, cytoplasmic 1-like [Salmo salar]	100	XP_014042641.1	PREDICTED: actin, cytoplasmic 1-like [Salmo salar]	544	XP_014043956.1	PREDICTED: apolipoprotein B-100-like [Salmo salar]	308.916	XP_014042641.1	PREDICTED: actin, cytoplasmic 1-like [Salmo salar]
Hk_0001224	481	1.05064e-114	XP_014042641.1	PREDICTED: actin, cytoplasmic 1-like [Salmo salar]	100	XP_014042641.1	PREDICTED: actin, cytoplasmic 1-like [Salmo salar]	100	XP_014042641.1	PREDICTED: actin, cytoplasmic 1-like [Salmo salar]	544	XP_014043956.1	PREDICTED: apolipoprotein B-100-like [Salmo salar]	308.916	XP_014042641.1	PREDICTED: actin, cytoplasmic 1-like [Salmo salar]
Hk_0001225	481	1.05064e-114	XP_014042641.1	PREDICTED: actin, cytoplasmic 1-like [Salmo salar]	100	XP_014042641.1	PREDICTED: actin, cytoplasmic 1-like [Salmo salar]	100	XP_014042641.1	PREDICTED: actin, cytoplasmic 1-like [Salmo salar]	544	XP_014043956.1	PREDICTED: apolipoprotein B-100-like [Salmo salar]	308.916	XP_014042641.1	PREDICTED: actin, cytoplasmic 1-like [Salmo salar]
Hk_0001226	483	1.05833e-114	XP_014042641.1	PREDICTED: actin, cytoplasmic 1-like [Salmo salar]	100	XP_014042641.1	PREDICTED: actin, cytoplasmic 1-like [Salmo salar]	100	XP_014042641.1	PREDICTED: actin, cytoplasmic 1-like [Salmo salar]	544	XP_014043956.1	PREDICTED: apolipoprotein B-100-like [Salmo salar]	308.916	XP_014042641.1	PREDICTED: actin, cytoplasmic 1-like [Salmo salar]
Hk_0001227	473	1.05096e-114	XP_014042641.1	PREDICTED: actin, cytoplasmic 1-like [Salmo salar]	100	XP_014042641.1	PREDICTED: actin, cytoplasmic 1-like [Salmo salar]	100	XP_014042641.1	PREDICTED: actin, cytoplasmic 1-like [Salmo salar]	544	XP_014043956.1	PREDICTED: apolipoprotein B-100-like [Salmo salar]	308.916	XP_014042641.1	PREDICTED: actin, cytoplasmic 1-like [Salmo salar]
Hk_0001228	463	1.05336e-114	XP_014042641.1	PREDICTED: actin, cytoplasmic 1-like [Salmo salar]	100	XP_014042641.1	PREDICTED: actin, cytoplasmic 1-like [Salmo salar]	100	XP_014042641.1	PREDICTED: actin, cytoplasmic 1-like [Salmo salar]	544	XP_014043956.1	PREDICTED: apolipoprotein B-100-like [Salmo salar]	308.916	XP_014042641.1	PREDICTED: actin, cytoplasmic 1-like [Salmo salar]
Hk_0001229	461	1.05801e-114	XP_014042641.1	PREDICTED: actin, cytoplasmic 1-like [Salmo salar]	100	XP_014042641.1	PREDICTED: actin, cytoplasmic 1-like [Salmo salar]	100	XP_014042641.1	PREDICTED: actin, cytoplasmic 1-like [Salmo salar]	544	XP_014043956.1	PREDICTED: apolipoprotein B-100-like [Salmo salar]	308.916	XP_014042641.1	PREDICTED: actin, cytoplasmic 1-like [Salmo salar]
Hk_0001230	483	1.0508e-114	XP_014042641.1	PREDICTED: actin, cytoplasmic 1-like [Salmo salar]	100	XP_014042641.1	PREDICTED: actin, cytoplasmic 1-like [Salmo salar]	100	XP_014042641.1	PREDICTED: actin, cytoplasmic 1-like [Salmo salar]	544	XP_014043956.1	PREDICTED: apolipoprotein B-100-like [Salmo salar]	308.916	XP_014042641.1	PREDICTED: actin, cytoplasmic 1-like [Salmo salar]
Hk_0001231	485	1.06362e-114	XP_014042641.1	PREDICTED: actin, cytoplasmic 1-like [Salmo salar]	100	XP_014042641.1	PREDICTED: actin, cytoplasmic 1-like [Salmo salar]	100	XP_014042641.1	PREDICTED: actin, cytoplasmic 1-like [Salmo salar]	544	XP_014043956.1	PREDICTED: apolipoprotein B-100-like [Salmo salar]	308.916	XP_014042641.1	PREDICTED: actin, cytoplasmic 1-like [Salmo salar]
Hk_0000367	664	6.22525e-74	ACI66028.1	Transposable element Tcb1 transposase [Salmo salar]	100	XP_014043980.1	PREDICTED: collagen alpha-1(VI) chain-like [Salmo salar]	100	ACI68435.1	60S ribosomal protein L37a [Salmo salar]	342	XP_014030152.1	PREDICTED: uncharacterized protein LOC106586928 [Salmo salar]	252.677	ACI66028.1	Transposable element Tcb1 transposase [Salmo salar]
Hk_0000368	173	1.28693e-167	AKP40998.1	ORF2 protein [Salmo salar]	100	XP_014047128.1	PREDICTED: heterogeneous nuclear ribonucleoprotein C-like isoform X3 [Salmo salar]	100	ACI68435.1	60S ribosomal protein L37a [Salmo salar]	337	XP_014030152.1	PREDICTED: uncharacterized protein LOC106586928 [Salmo salar]	555.058	AKP40998.1	ORF2 protein [Salmo salar]
Hk_0000369	161	1.2892e-167	AKP40998.1	ORF2 protein [Salmo salar]	100	XP_014047128.1	PREDICTED: heterogeneous nuclear ribonucleoprotein C-like isoform X3 [Salmo salar]	100	ACI68435.1	60S ribosomal protein L37a [Salmo salar]	346	XP_014030152.1	PREDICTED: uncharacterized protein LOC106586928 [Salmo salar]	555.058	AKP40998.1	ORF2 protein [Salmo salar]
Hk_0000370	226	5.65557e-84	ACN11475.1	Transposable element Tcb1 transposase [Salmo salar]	100	XP_014045492.1	PREDICTED: dipeptidyl peptidase 9-like isoform X1 [Salmo salar]	100	XP_014045492.1	PREDICTED: dipeptidyl peptidase 9-like isoform X1 [Salmo salar]	276	ACH85309.1	transposase-like [Salmo salar]	280.796	ACN11475.1	Transposable element Tcb1 transposase [Salmo salar]
Hk_0000371	250	5.69306e-84	ACN11475.1	Transposable element Tcb1 transposase [Salmo salar]	100	XP_014045492.1	PREDICTED: dipeptidyl peptidase 9-like isoform X1 [Salmo salar]	100	XP_014045492.1	PREDICTED: dipeptidyl peptidase 9-like isoform X1 [Salmo salar]	276	ACH85309.1	transposase-like [Salmo salar]	280.796	ACN11475.1	Transposable element Tcb1 transposase [Salmo salar]
Hk_0000372	262	5.65732e-84	ACN11475.1	Transposable element Tcb1 transposase [Salmo salar]	100	XP_014045492.1	PREDICTED: dipeptidyl peptidase 9-like isoform X1 [Salmo salar]	100	XP_014045492.1	PREDICTED: dipeptidyl peptidase 9-like isoform X1 [Salmo salar]	276	ACH85309.1	transposase-like [Salmo salar]	280.796	ACN11475.1	Transposable element Tcb1 transposase [Salmo salar]
Hk_0000373	164	1.31444e-157	ABV31711.1	transposase [Salmo salar]	100	XP_013989248.1	PREDICTED: zinc finger protein 454-like [Salmo salar]	100	XP_013989248.1	PREDICTED: zinc finger protein 454-like [Salmo salar]	270	ABV31711.1	transposase [Salmo salar]	493.812	ABV31711.1	transposase [Salmo salar]
Hk_0000374	164	1.38928e-157	ABV31711.1	transposase [Salmo salar]	100	XP_013989248.1	PREDICTED: zinc finger protein 454-like [Salmo salar]	100	XP_013989248.1	PREDICTED: zinc finger protein 454-like [Salmo salar]	270	ABV31711.1	transposase [Salmo salar]	493.812	ABV31711.1	transposase [Salmo salar]
Hk_0000375	293	6.7487e-36	ABQ01985.1	collagen Type XI Alpha2 [Salmo salar]	89.1892	XP_013996492.1	PREDICTED: yjeF N-terminal domain-containing protein 3-like [Salmo salar]	97.2973	ABQ01985.1	collagen Type XI Alpha2 [Salmo salar]	171	AKP40998.1	ORF2 protein [Salmo salar]	130.568	XP_014040395.1	PREDICTED: uncharacterized protein LOC106593572 isoform X1 [Salmo salar]
Hk_0000376	290	6.77729e-36	ABQ01985.1	collagen Type XI Alpha2 [Salmo salar]	89.1892	XP_013996492.1	PREDICTED: yjeF N-terminal domain-containing protein 3-like [Salmo salar]	100	XP_013996492.1	PREDICTED: yjeF N-terminal domain-containing protein 3-like [Salmo salar]	171	AKP40998.1	ORF2 protein [Salmo salar]	130.568	XP_014040395.1	PREDICTED: uncharacterized protein LOC106593572 isoform X1 [Salmo salar]
Hk_0000377	291	6.76912e-36	ABQ01985.1	collagen Type XI Alpha2 [Salmo salar]	89.1892	XP_013996492.1	PREDICTED: yjeF N-terminal domain-containing protein 3-like [Salmo salar]	100	XP_013996492.1	PREDICTED: yjeF N-terminal domain-containing protein 3-like [Salmo salar]	171	AKP40998.1	ORF2 protein [Salmo salar]	130.568	XP_014040395.1	PREDICTED: uncharacterized protein LOC106593572 isoform X1 [Salmo salar]
Hk_0000378	503	2.88631e-118	XP_014055583.1	PREDICTED: fibroblast growth factor receptor-like 1 isoform X1 [Salmo salar]	100	ACH70808.1	ribosomal protein L19 [Salmo salar]	100	XP_014051178.1	PREDICTED: sodium-dependent phosphate transport protein 2A-like [Salmo salar]	466	XP_014065551.1	PREDICTED: transposon Tf2-1 polyprotein [Salmo salar]	402.134	XP_014055583.1	PREDICTED: fibroblast growth factor receptor-like 1 isoform X1 [Salmo salar]
Hk_0000379	499	5.33954e-118	XP_014055583.1	PREDICTED: fibroblast growth factor receptor-like 1 isoform X1 [Salmo salar]	100	ACH70808.1	ribosomal protein L19 [Salmo salar]	100	XP_014051178.1	PREDICTED: sodium-dependent phosphate transport protein 2A-like [Salmo salar]	466	ACN60195.1	Retrotransposable element Tf2 155 kDa protein type 3, partial [Salmo salar]	401.364	XP_014055583.1	PREDICTED: fibroblast growth factor receptor-like 1 isoform X1 [Salmo salar]
Hk_0000380	474	2.32703e-101	AEB77813.1	olfactory receptor family C subfamily 2 member 2 [Salmo salar]	100	ACH70808.1	ribosomal protein L19 [Salmo salar]	100	XP_014051178.1	PREDICTED: sodium-dependent phosphate transport protein 2A-like [Salmo salar]	358	XP_013990514.1	PREDICTED: uncharacterized protein K02A2.6-like isoform X1 [Salmo salar]	302.753	XP_014055583.1	PREDICTED: fibroblast growth factor receptor-like 1 isoform X1 [Salmo salar]
Hk_0000381	448	2.32809e-101	AEB77813.1	olfactory receptor family C subfamily 2 member 2 [Salmo salar]	100	ACH70808.1	ribosomal protein L19 [Salmo salar]	100	XP_014051178.1	PREDICTED: sodium-dependent phosphate transport protein 2A-like [Salmo salar]	358	XP_013990514.1	PREDICTED: uncharacterized protein K02A2.6-like isoform X1 [Salmo salar]	264.233	AEB77813.1	olfactory receptor family C subfamily 2 member 2 [Salmo salar]
Hk_0000382	731	0	XP_013984347.1	PREDICTED: uncharacterized protein K02A2.6-like [Salmo salar]	100	XP_014048550.1	PREDICTED: apoptosis regulator BAX-like [Salmo salar]	100	XP_014048550.1	PREDICTED: apoptosis regulator BAX-like [Salmo salar]	768	XP_014068056.1	PREDICTED: uncharacterized protein LOC106611918 [Salmo salar]	1265.75	XP_013984347.1	PREDICTED: uncharacterized protein K02A2.6-like [Salmo salar]
Hk_0000383	640	0	XP_013984347.1	PREDICTED: uncharacterized protein K02A2.6-like [Salmo salar]	100	XP_014048550.1	PREDICTED: apoptosis regulator BAX-like [Salmo salar]	100	XP_014048550.1	PREDICTED: apoptosis regulator BAX-like [Salmo salar]	768	XP_014068056.1	PREDICTED: uncharacterized protein LOC106611918 [Salmo salar]	1265.75	XP_013984347.1	PREDICTED: uncharacterized protein K02A2.6-like [Salmo salar]
Hk_0000384	631	0	XP_013984347.1	PREDICTED: uncharacterized protein K02A2.6-like [Salmo salar]	100	XP_014048550.1	PREDICTED: apoptosis regulator BAX-like [Salmo salar]	100	XP_014048550.1	PREDICTED: apoptosis regulator BAX-like [Salmo salar]	768	XP_014068056.1	PREDICTED: uncharacterized protein LOC106611918 [Salmo salar]	1265.75	XP_013984347.1	PREDICTED: uncharacterized protein K02A2.6-like [Salmo salar]
Hk_0000385	624	0	XP_013984347.1	PREDICTED: uncharacterized protein K02A2.6-like [Salmo salar]	100	XP_014048550.1	PREDICTED: apoptosis regulator BAX-like [Salmo salar]	100	XP_014048550.1	PREDICTED: apoptosis regulator BAX-like [Salmo salar]	768	XP_014068056.1	PREDICTED: uncharacterized protein LOC106611918 [Salmo salar]	1265.75	XP_013984347.1	PREDICTED: uncharacterized protein K02A2.6-like [Salmo salar]
Hk_0000386	969	7.3566e-73	XP_014059773.1	PREDICTED: hemoglobin subunit beta-1-like [Salmo salar]	100	XP_014048454.1	PREDICTED: hemoglobin subunit beta-1-like [Salmo salar]	100	XP_014048460.1	PREDICTED: uncharacterized protein LOC106601081 [Salmo salar]	145	XP_014059773.1	PREDICTED: hemoglobin subunit beta-1-like [Salmo salar]	243.432	XP_014059773.1	PREDICTED: hemoglobin subunit beta-1-like [Salmo salar]
Hk_0000387	1085	7.38205e-73	XP_014059773.1	PREDICTED: hemoglobin subunit beta-1-like [Salmo salar]	100	XP_014048460.1	PREDICTED: uncharacterized protein LOC106601081 [Salmo salar]	100	XP_014048460.1	PREDICTED: uncharacterized protein LOC106601081 [Salmo salar]	145	XP_014059773.1	PREDICTED: hemoglobin subunit beta-1-like [Salmo salar]	243.432	XP_014059773.1	PREDICTED: hemoglobin subunit beta-1-like [Salmo salar]
Hk_0000388	1106	7.34443e-73	XP_014059773.1	PREDICTED: hemoglobin subunit beta-1-like [Salmo salar]	100	XP_014048454.1	PREDICTED: hemoglobin subunit beta-1-like [Salmo salar]	100	XP_014048454.1	PREDICTED: hemoglobin subunit beta-1-like [Salmo salar]	145	XP_014059773.1	PREDICTED: hemoglobin subunit beta-1-like [Salmo salar]	243.432	XP_014059773.1	PREDICTED: hemoglobin subunit beta-1-like [Salmo salar]
Hk_0000389	1110	7.34553e-73	XP_014059773.1	PREDICTED: hemoglobin subunit beta-1-like [Salmo salar]	100	XP_014048454.1	PREDICTED: hemoglobin subunit beta-1-like [Salmo salar]	100	XP_014048454.1	PREDICTED: hemoglobin subunit beta-1-like [Salmo salar]	145	XP_014059773.1	PREDICTED: hemoglobin subunit beta-1-like [Salmo salar]	243.432	XP_014059773.1	PREDICTED: hemoglobin subunit beta-1-like [Salmo salar]
Hk_0000390	1099	7.37541e-73	XP_014059773.1	PREDICTED: hemoglobin subunit beta-1-like [Salmo salar]	100	XP_014000768.1	PREDICTED: zinc finger protein 436-like [Salmo salar]	100	XP_014000768.1	PREDICTED: zinc finger protein 436-like [Salmo salar]	145	XP_014059773.1	PREDICTED: hemoglobin subunit beta-1-like [Salmo salar]	243.432	XP_014059773.1	PREDICTED: hemoglobin subunit beta-1-like [Salmo salar]
Hk_0000391	1123	7.36435e-73	XP_014059773.1	PREDICTED: hemoglobin subunit beta-1-like [Salmo salar]	100	XP_014000768.1	PREDICTED: zinc finger protein 436-like [Salmo salar]	100	XP_014000768.1	PREDICTED: zinc finger protein 436-like [Salmo salar]	191	XP_014026699.1	PREDICTED: LOW QUALITY PROTEIN: uncharacterized protein LOC106585230 [Salmo salar]	243.432	XP_014059773.1	PREDICTED: hemoglobin subunit beta-1-like [Salmo salar]
Hk_0000392	1167	0	XP_014000059.1	PREDICTED: uncharacterized protein LOC106571454 [Salmo salar]	100	XP_014000768.1	PREDICTED: zinc finger protein 436-like [Salmo salar]	100	XP_014000768.1	PREDICTED: zinc finger protein 436-like [Salmo salar]	327	XP_014000059.1	PREDICTED: uncharacterized protein LOC106571454 [Salmo salar]	649.432	XP_014000059.1	PREDICTED: uncharacterized protein LOC106571454 [Salmo salar]
Hk_0000393	1167	0	XP_014000059.1	PREDICTED: uncharacterized protein LOC106571454 [Salmo salar]	100	XP_014000768.1	PREDICTED: zinc finger protein 436-like [Salmo salar]	100	XP_014000768.1	PREDICTED: zinc finger protein 436-like [Salmo salar]	327	XP_014000059.1	PREDICTED: uncharacterized protein LOC106571454 [Salmo salar]	649.432	XP_014000059.1	PREDICTED: uncharacterized protein LOC106571454 [Salmo salar]
Hk_0000394	1167	0	XP_014000059.1	PREDICTED: uncharacterized protein LOC106571454 [Salmo salar]	100	XP_014000768.1	PREDICTED: zinc finger protein 436-like [Salmo salar]	100	XP_014000768.1	PREDICTED: zinc finger protein 436-like [Salmo salar]	327	XP_014000059.1	PREDICTED: uncharacterized protein LOC106571454 [Salmo salar]	649.432	XP_014000059.1	PREDICTED: uncharacterized protein LOC106571454 [Salmo salar]
Hk_0000395	1166	0	XP_014000059.1	PREDICTED: uncharacterized protein LOC106571454 [Salmo salar]	100	XP_014000768.1	PREDICTED: zinc finger protein 436-like [Salmo salar]	100	XP_014000768.1	PREDICTED: zinc finger protein 436-like [Salmo salar]	327	XP_014000059.1	PREDICTED: uncharacterized protein LOC106571454 [Salmo salar]	649.432	XP_014000059.1	PREDICTED: uncharacterized protein LOC106571454 [Salmo salar]
Hk_0000396	1190	0	XP_014000059.1	PREDICTED: uncharacterized protein LOC106571454 [Salmo salar]	100	XP_014000768.1	PREDICTED: zinc finger protein 436-like [Salmo salar]	100	XP_014000768.1	PREDICTED: zinc finger protein 436-like [Salmo salar]	327	XP_014000059.1	PREDICTED: uncharacterized protein LOC106571454 [Salmo salar]	649.432	XP_014000059.1	PREDICTED: uncharacterized protein LOC106571454 [Salmo salar]
Hk_0000397	1166	0	XP_014000059.1	PREDICTED: uncharacterized protein LOC106571454 [Salmo salar]	100	XP_014000768.1	PREDICTED: zinc finger protein 436-like [Salmo salar]	100	XP_014000768.1	PREDICTED: zinc finger protein 436-like [Salmo salar]	327	XP_014000059.1	PREDICTED: uncharacterized protein LOC106571454 [Salmo salar]	649.432	XP_014000059.1	PREDICTED: uncharacterized protein LOC106571454 [Salmo salar]
Hk_0000398	1171	0	XP_014000059.1	PREDICTED: uncharacterized protein LOC106571454 [Salmo salar]	100	XP_014000768.1	PREDICTED: zinc finger protein 436-like [Salmo salar]	100	XP_014000768.1	PREDICTED: zinc finger protein 436-like [Salmo salar]	327	XP_014000059.1	PREDICTED: uncharacterized protein LOC106571454 [Salmo salar]	649.432	XP_014000059.1	PREDICTED: uncharacterized protein LOC106571454 [Salmo salar]
Hk_0000399	1170	0	XP_014000059.1	PREDICTED: uncharacterized protein LOC106571454 [Salmo salar]	100	XP_014000768.1	PREDICTED: zinc finger protein 436-like [Salmo salar]	100	XP_014000768.1	PREDICTED: zinc finger protein 436-like [Salmo salar]	327	XP_014000059.1	PREDICTED: uncharacterized protein LOC106571454 [Salmo salar]	649.432	XP_014000059.1	PREDICTED: uncharacterized protein LOC106571454 [Salmo salar]
Hk_0000400	1192	0	XP_014000059.1	PREDICTED: uncharacterized protein LOC106571454 [Salmo salar]	100	XP_014000768.1	PREDICTED: zinc finger protein 436-like [Salmo salar]	100	XP_014000768.1	PREDICTED: zinc finger protein 436-like [Salmo salar]	327	XP_014000059.1	PREDICTED: uncharacterized protein LOC106571454 [Salmo salar]	649.432	XP_014000059.1	PREDICTED: uncharacterized protein LOC106571454 [Salmo salar]
Hk_0000401	1169	0	XP_014000059.1	PREDICTED: uncharacterized protein LOC106571454 [Salmo salar]	100	XP_014000768.1	PREDICTED: zinc finger protein 436-like [Salmo salar]	100	XP_014000768.1	PREDICTED: zinc finger protein 436-like [Salmo salar]	327	XP_014000059.1	PREDICTED: uncharacterized protein LOC106571454 [Salmo salar]	649.432	XP_014000059.1	PREDICTED: uncharacterized protein LOC106571454 [Salmo salar]
Hk_0000402	1191	0	XP_014000059.1	PREDICTED: uncharacterized protein LOC106571454 [Salmo salar]	100	XP_014000768.1	PREDICTED: zinc finger protein 436-like [Salmo salar]	100	XP_014000768.1	PREDICTED: zinc finger protein 436-like [Salmo salar]	327	XP_014000059.1	PREDICTED: uncharacterized protein LOC106571454 [Salmo salar]	649.432	XP_014000059.1	PREDICTED: uncharacterized protein LOC106571454 [Salmo salar]
Hk_0000403	1170	0	XP_014000059.1	PREDICTED: uncharacterized protein LOC106571454 [Salmo salar]	100	XP_014000768.1	PREDICTED: zinc finger protein 436-like [Salmo salar]	100	XP_014000768.1	PREDICTED: zinc finger protein 436-like [Salmo salar]	327	XP_014000059.1	PREDICTED: uncharacterized protein LOC106571454 [Salmo salar]	649.432	XP_014000059.1	PREDICTED: uncharacterized protein LOC106571454 [Salmo salar]
Hk_0000404	648	3.25892e-131	XP_014021308.1	PREDICTED: uncharacterized protein LOC106582599 [Salmo salar]	100	CAA65953.1	beta-globin [Salmo salar]	100	CAA65953.1	beta-globin [Salmo salar]	340	ABV31710.1	transposase [Salmo salar]	433.721	XP_014021308.1	PREDICTED: uncharacterized protein LOC106582599 [Salmo salar]
Hk_0000405	648	1.37805e-142	XP_014021308.1	PREDICTED: uncharacterized protein LOC106582599 [Salmo salar]	100	CAA65953.1	beta-globin [Salmo salar]	100	CAA65953.1	beta-globin [Salmo salar]	340	ABV31710.1	transposase [Salmo salar]	466.848	XP_014021308.1	PREDICTED: uncharacterized protein LOC106582599 [Salmo salar]
Hk_0000406	644	1.16967e-143	XP_014019537.1	PREDICTED: uncharacterized protein LOC106581772, partial [Salmo salar]	100	CAA65953.1	beta-globin [Salmo salar]	100	CAA65953.1	beta-globin [Salmo salar]	343	XP_014067472.1	PREDICTED: uncharacterized protein LOC106611608 [Salmo salar]	467.233	XP_014021308.1	PREDICTED: uncharacterized protein LOC106582599 [Salmo salar]
Hk_0000407	670	1.16892e-143	XP_014019537.1	PREDICTED: uncharacterized protein LOC106581772, partial [Salmo salar]	100	CAA65953.1	beta-globin [Salmo salar]	100	CAA65953.1	beta-globin [Salmo salar]	343	XP_014067472.1	PREDICTED: uncharacterized protein LOC106611608 [Salmo salar]	467.233	XP_014021308.1	PREDICTED: uncharacterized protein LOC106582599 [Salmo salar]
Hk_0000408	674	1.16854e-143	XP_014019537.1	PREDICTED: uncharacterized protein LOC106581772, partial [Salmo salar]	100	CAA65953.1	beta-globin [Salmo salar]	100	CAA65953.1	beta-globin [Salmo salar]	343	XP_014067472.1	PREDICTED: uncharacterized protein LOC106611608 [Salmo salar]	467.233	XP_014021308.1	PREDICTED: uncharacterized protein LOC106582599 [Salmo salar]
Hk_0000409	673	1.1693e-143	XP_014019537.1	PREDICTED: uncharacterized protein LOC106581772, partial [Salmo salar]	100	CAA65953.1	beta-globin [Salmo salar]	100	CAA65953.1	beta-globin [Salmo salar]	343	XP_014067472.1	PREDICTED: uncharacterized protein LOC106611608 [Salmo salar]	467.233	XP_014021308.1	PREDICTED: uncharacterized protein LOC106582599 [Salmo salar]
Hk_0000410	687	0	ACN60195.1	Retrotransposable element Tf2 155 kDa protein type 3, partial [Salmo salar]	100	CAA65953.1	beta-globin [Salmo salar]	100	CAA65953.1	beta-globin [Salmo salar]	499	ACN60195.1	Retrotransposable element Tf2 155 kDa protein type 3, partial [Salmo salar]	828.165	ACN60195.1	Retrotransposable element Tf2 155 kDa protein type 3, partial [Salmo salar]
Hk_0000411	687	0	ACN60195.1	Retrotransposable element Tf2 155 kDa protein type 3, partial [Salmo salar]	100	CAA65953.1	beta-globin [Salmo salar]	100	CAA65953.1	beta-globin [Salmo salar]	499	ACN60195.1	Retrotransposable element Tf2 155 kDa protein type 3, partial [Salmo salar]	828.165	ACN60195.1	Retrotransposable element Tf2 155 kDa protein type 3, partial [Salmo salar]
Hk_0000412	688	0	ACN60195.1	Retrotransposable element Tf2 155 kDa protein type 3, partial [Salmo salar]	100	CAA65953.1	beta-globin [Salmo salar]	100	CAA65953.1	beta-globin [Salmo salar]	499	ACN60195.1	Retrotransposable element Tf2 155 kDa protein type 3, partial [Salmo salar]	828.165	ACN60195.1	Retrotransposable element Tf2 155 kDa protein type 3, partial [Salmo salar]
Hk_0000413	688	0	ACN60195.1	Retrotransposable element Tf2 155 kDa protein type 3, partial [Salmo salar]	100	CAA65953.1	beta-globin [Salmo salar]	100	CAA65953.1	beta-globin [Salmo salar]	499	ACN60195.1	Retrotransposable element Tf2 155 kDa protein type 3, partial [Salmo salar]	828.165	ACN60195.1	Retrotransposable element Tf2 155 kDa protein type 3, partial [Salmo salar]
Hk_0000414	688	0	ACN60195.1	Retrotransposable element Tf2 155 kDa protein type 3, partial [Salmo salar]	100	CAA65953.1	beta-globin [Salmo salar]	100	CAA65953.1	beta-globin [Salmo salar]	499	ACN60195.1	Retrotransposable element Tf2 155 kDa protein type 3, partial [Salmo salar]	828.165	ACN60195.1	Retrotransposable element Tf2 155 kDa protein type 3, partial [Salmo salar]
Hk_0000415	688	0	ACN60195.1	Retrotransposable element Tf2 155 kDa protein type 3, partial [Salmo salar]	100	CAA65953.1	beta-globin [Salmo salar]	100	CAA65953.1	beta-globin [Salmo salar]	499	ACN60195.1	Retrotransposable element Tf2 155 kDa protein type 3, partial [Salmo salar]	828.165	ACN60195.1	Retrotransposable element Tf2 155 kDa protein type 3, partial [Salmo salar]
Hk_0000416	828	0	ACN60195.1	Retrotransposable element Tf2 155 kDa protein type 3, partial [Salmo salar]	100	ACI69922.1	Hemoglobin subunit beta-1 [Salmo salar]	100	ACI69922.1	Hemoglobin subunit beta-1 [Salmo salar]	499	ACN60195.1	Retrotransposable element Tf2 155 kDa protein type 3, partial [Salmo salar]	828.165	ACN60195.1	Retrotransposable element Tf2 155 kDa protein type 3, partial [Salmo salar]
Hk_0000417	916	6.20006e-72	XP_014059773.1	PREDICTED: hemoglobin subunit beta-1-like [Salmo salar]	100	ACI69922.1	Hemoglobin subunit beta-1 [Salmo salar]	100	ACI69922.1	Hemoglobin subunit beta-1 [Salmo salar]	145	XP_014059773.1	PREDICTED: hemoglobin subunit beta-1-like [Salmo salar]	240.736	XP_014059773.1	PREDICTED: hemoglobin subunit beta-1-like [Salmo salar]
Hk_0000418	915	6.17024e-72	XP_014059773.1	PREDICTED: hemoglobin subunit beta-1-like [Salmo salar]	100	ACI69922.1	Hemoglobin subunit beta-1 [Salmo salar]	100	ACI69922.1	Hemoglobin subunit beta-1 [Salmo salar]	145	XP_014059773.1	PREDICTED: hemoglobin subunit beta-1-like [Salmo salar]	240.736	XP_014059773.1	PREDICTED: hemoglobin subunit beta-1-like [Salmo salar]
Hk_0000419	915	6.16092e-72	XP_014059773.1	PREDICTED: hemoglobin subunit beta-1-like [Salmo salar]	100	ACI69922.1	Hemoglobin subunit beta-1 [Salmo salar]	100	ACI69922.1	Hemoglobin subunit beta-1 [Salmo salar]	145	XP_014059773.1	PREDICTED: hemoglobin subunit beta-1-like [Salmo salar]	240.736	XP_014059773.1	PREDICTED: hemoglobin subunit beta-1-like [Salmo salar]
Hk_0000420	913	6.18422e-72	XP_014059773.1	PREDICTED: hemoglobin subunit beta-1-like [Salmo salar]	100	ACI69922.1	Hemoglobin subunit beta-1 [Salmo salar]	100	ACI69922.1	Hemoglobin subunit beta-1 [Salmo salar]	145	XP_014059773.1	PREDICTED: hemoglobin subunit beta-1-like [Salmo salar]	240.736	XP_014059773.1	PREDICTED: hemoglobin subunit beta-1-like [Salmo salar]
Hk_0000421	977	6.16372e-72	XP_014059773.1	PREDICTED: hemoglobin subunit beta-1-like [Salmo salar]	100	ACI69922.1	Hemoglobin subunit beta-1 [Salmo salar]	100	ACI69922.1	Hemoglobin subunit beta-1 [Salmo salar]	237	ABV31710.1	transposase [Salmo salar]	240.736	XP_014059773.1	PREDICTED: hemoglobin subunit beta-1-like [Salmo salar]
Hk_0000422	978	6.15533e-72	XP_014059773.1	PREDICTED: hemoglobin subunit beta-1-like [Salmo salar]	100	ACI69922.1	Hemoglobin subunit beta-1 [Salmo salar]	100	ACI69922.1	Hemoglobin subunit beta-1 [Salmo salar]	237	ABV31710.1	transposase [Salmo salar]	240.736	XP_014059773.1	PREDICTED: hemoglobin subunit beta-1-like [Salmo salar]
Hk_0000423	986	6.15719e-72	XP_014059773.1	PREDICTED: hemoglobin subunit beta-1-like [Salmo salar]	100	ACI69922.1	Hemoglobin subunit beta-1 [Salmo salar]	100	ACI69922.1	Hemoglobin subunit beta-1 [Salmo salar]	237	ABV31710.1	transposase [Salmo salar]	240.736	XP_014059773.1	PREDICTED: hemoglobin subunit beta-1-like [Salmo salar]
Hk_0000424	986	6.1488e-72	XP_014059773.1	PREDICTED: hemoglobin subunit beta-1-like [Salmo salar]	100	ACI69922.1	Hemoglobin subunit beta-1 [Salmo salar]	100	ACI69922.1	Hemoglobin subunit beta-1 [Salmo salar]	237	ABV31710.1	transposase [Salmo salar]	240.736	XP_014059773.1	PREDICTED: hemoglobin subunit beta-1-like [Salmo salar]
Hk_0000425	986	6.17397e-72	XP_014059773.1	PREDICTED: hemoglobin subunit beta-1-like [Salmo salar]	100	ACI69922.1	Hemoglobin subunit beta-1 [Salmo salar]	100	ACI69922.1	Hemoglobin subunit beta-1 [Salmo salar]	237	ABV31710.1	transposase [Salmo salar]	240.736	XP_014059773.1	PREDICTED: hemoglobin subunit beta-1-like [Salmo salar]
Hk_0000426	1013	6.15999e-72	XP_014059773.1	PREDICTED: hemoglobin subunit beta-1-like [Salmo salar]	100	ACI69922.1	Hemoglobin subunit beta-1 [Salmo salar]	100	XP_014059773.1	PREDICTED: hemoglobin subunit beta-1-like [Salmo salar]	237	ABV31710.1	transposase [Salmo salar]	240.736	XP_014059773.1	PREDICTED: hemoglobin subunit beta-1-like [Salmo salar]
Hk_0000427	1006	6.1544e-72	XP_014059773.1	PREDICTED: hemoglobin subunit beta-1-like [Salmo salar]	100	ACI69922.1	Hemoglobin subunit beta-1 [Salmo salar]	100	XP_014059773.1	PREDICTED: hemoglobin subunit beta-1-like [Salmo salar]	237	ABV31710.1	transposase [Salmo salar]	240.736	XP_014059773.1	PREDICTED: hemoglobin subunit beta-1-like [Salmo salar]
Hk_0000428	1003	6.15253e-72	XP_014059773.1	PREDICTED: hemoglobin subunit beta-1-like [Salmo salar]	100	ACI69922.1	Hemoglobin subunit beta-1 [Salmo salar]	100	XP_014059773.1	PREDICTED: hemoglobin subunit beta-1-like [Salmo salar]	237	ABV31710.1	transposase [Salmo salar]	240.736	XP_014059773.1	PREDICTED: hemoglobin subunit beta-1-like [Salmo salar]
Hk_0000429	1000	6.14974e-72	XP_014059773.1	PREDICTED: hemoglobin subunit beta-1-like [Salmo salar]	100	ACI69922.1	Hemoglobin subunit beta-1 [Salmo salar]	100	XP_014059773.1	PREDICTED: hemoglobin subunit beta-1-like [Salmo salar]	237	ABV31710.1	transposase [Salmo salar]	240.736	XP_014059773.1	PREDICTED: hemoglobin subunit beta-1-like [Salmo salar]
Hk_0000430	1000	6.14601e-72	XP_014059773.1	PREDICTED: hemoglobin subunit beta-1-like [Salmo salar]	100	ACI69922.1	Hemoglobin subunit beta-1 [Salmo salar]	100	XP_014059773.1	PREDICTED: hemoglobin subunit beta-1-like [Salmo salar]	237	ABV31710.1	transposase [Salmo salar]	240.736	XP_014059773.1	PREDICTED: hemoglobin subunit beta-1-like [Salmo salar]
Hk_0000431	1059	6.20379e-72	XP_014059773.1	PREDICTED: hemoglobin subunit beta-1-like [Salmo salar]	100	ACI69922.1	Hemoglobin subunit beta-1 [Salmo salar]	100	XP_014059773.1	PREDICTED: hemoglobin subunit beta-1-like [Salmo salar]	237	ABV31710.1	transposase [Salmo salar]	240.736	XP_014059773.1	PREDICTED: hemoglobin subunit beta-1-like [Salmo salar]
Hk_0000432	817	3.812e-64	ACN09994.1	Hemoglobin subunit alpha-4 [Salmo salar]	100	ACN09994.1	Hemoglobin subunit alpha-4 [Salmo salar]	100	ACN09994.1	Hemoglobin subunit alpha-4 [Salmo salar]	275	XP_013998656.1	PREDICTED: early nodulin-75-like [Salmo salar]	218.394	ACN09994.1	Hemoglobin subunit alpha-4 [Salmo salar]
Hk_0000433	829	9.41101e-79	ABV31711.1	transposase [Salmo salar]	100	ACN09994.1	Hemoglobin subunit alpha-4 [Salmo salar]	100	ACN09994.1	Hemoglobin subunit alpha-4 [Salmo salar]	275	XP_013998656.1	PREDICTED: early nodulin-75-like [Salmo salar]	267.7	ABV31711.1	transposase [Salmo salar]
Hk_0000434	840	6.08406e-138	ABV31711.1	transposase [Salmo salar]	100	ACN09994.1	Hemoglobin subunit alpha-4 [Salmo salar]	100	ACN09994.1	Hemoglobin subunit alpha-4 [Salmo salar]	275	XP_013998656.1	PREDICTED: early nodulin-75-like [Salmo salar]	437.573	ABV31711.1	transposase [Salmo salar]
Hk_0000435	516	6.33093e-90	XP_014062993.1	PREDICTED: uncharacterized protein LOC106609103 isoform X3 [Salmo salar]	100	XP_014048427.1	PREDICTED: hemoglobin subunit beta-like [Salmo salar]	100	XP_014048449.1	PREDICTED: hemoglobin subunit beta-like [Salmo salar]	211	XP_014069719.1	PREDICTED: olfactory receptor 11A1-like [Salmo salar]	189.504	CAA65945.1	beta-globin [Salmo salar]
Hk_0000436	516	6.29938e-90	XP_014062993.1	PREDICTED: uncharacterized protein LOC106609103 isoform X3 [Salmo salar]	100	XP_014048427.1	PREDICTED: hemoglobin subunit beta-like [Salmo salar]	100	XP_014048449.1	PREDICTED: hemoglobin subunit beta-like [Salmo salar]	211	XP_014069719.1	PREDICTED: olfactory receptor 11A1-like [Salmo salar]	189.504	CAA65945.1	beta-globin [Salmo salar]
Hk_0000437	548	6.29843e-90	XP_014062993.1	PREDICTED: uncharacterized protein LOC106609103 isoform X3 [Salmo salar]	100	XP_014048427.1	PREDICTED: hemoglobin subunit beta-like [Salmo salar]	100	XP_014048449.1	PREDICTED: hemoglobin subunit beta-like [Salmo salar]	211	XP_014069719.1	PREDICTED: olfactory receptor 11A1-like [Salmo salar]	189.504	CAA65945.1	beta-globin [Salmo salar]
Hk_0000438	556	6.29938e-90	XP_014062993.1	PREDICTED: uncharacterized protein LOC106609103 isoform X3 [Salmo salar]	100	XP_014048427.1	PREDICTED: hemoglobin subunit beta-like [Salmo salar]	100	XP_014048449.1	PREDICTED: hemoglobin subunit beta-like [Salmo salar]	211	XP_014069719.1	PREDICTED: olfactory receptor 11A1-like [Salmo salar]	189.504	CAA65945.1	beta-globin [Salmo salar]
Hk_0000439	563	6.31564e-90	XP_014062993.1	PREDICTED: uncharacterized protein LOC106609103 isoform X3 [Salmo salar]	100	XP_014048427.1	PREDICTED: hemoglobin subunit beta-like [Salmo salar]	100	XP_014048449.1	PREDICTED: hemoglobin subunit beta-like [Salmo salar]	211	XP_014069719.1	PREDICTED: olfactory receptor 11A1-like [Salmo salar]	189.504	CAA65945.1	beta-globin [Salmo salar]
Hk_0000440	223	3.46404e-71	ABV31710.1	transposase [Salmo salar]	100	XP_014048814.1	PREDICTED: von Willebrand factor C domain-containing protein 2-like [Salmo salar]	100	XP_014048814.1	PREDICTED: von Willebrand factor C domain-containing protein 2-like [Salmo salar]	340	ABV31710.1	transposase [Salmo salar]	246.514	ABV31710.1	transposase [Salmo salar]
Hk_0000441	223	3.46135e-71	ABV31710.1	transposase [Salmo salar]	100	XP_014048814.1	PREDICTED: von Willebrand factor C domain-containing protein 2-like [Salmo salar]	100	XP_014048814.1	PREDICTED: von Willebrand factor C domain-containing protein 2-like [Salmo salar]	340	ABV31710.1	transposase [Salmo salar]	246.514	ABV31710.1	transposase [Salmo salar]
Hk_0000442	411	0	XP_014049330.1	PREDICTED: RUN domain-containing protein 1-like isoform X1 [Salmo salar]	100	XP_014058874.1	PREDICTED: RUN domain-containing protein 1-like [Salmo salar]	100	XP_014049330.1	PREDICTED: RUN domain-containing protein 1-like isoform X1 [Salmo salar]	287	XP_014049330.1	PREDICTED: RUN domain-containing protein 1-like isoform X1 [Salmo salar]	599.742	XP_014049330.1	PREDICTED: RUN domain-containing protein 1-like isoform X1 [Salmo salar]
Hk_0000443	432	0	XP_014049330.1	PREDICTED: RUN domain-containing protein 1-like isoform X1 [Salmo salar]	100	XP_014058874.1	PREDICTED: RUN domain-containing protein 1-like [Salmo salar]	100	XP_014049330.1	PREDICTED: RUN domain-containing protein 1-like isoform X1 [Salmo salar]	287	XP_014049330.1	PREDICTED: RUN domain-containing protein 1-like isoform X1 [Salmo salar]	599.742	XP_014049330.1	PREDICTED: RUN domain-containing protein 1-like isoform X1 [Salmo salar]
Hk_0000444	339	0	XP_014049330.1	PREDICTED: RUN domain-containing protein 1-like isoform X1 [Salmo salar]	100	XP_014058874.1	PREDICTED: RUN domain-containing protein 1-like [Salmo salar]	100	XP_014049330.1	PREDICTED: RUN domain-containing protein 1-like isoform X1 [Salmo salar]	287	XP_014049330.1	PREDICTED: RUN domain-containing protein 1-like isoform X1 [Salmo salar]	599.742	XP_014049330.1	PREDICTED: RUN domain-containing protein 1-like isoform X1 [Salmo salar]
Hk_0000445	598	0	XP_014058600.1	PREDICTED: uncharacterized protein LOC106606767 [Salmo salar]	100	ADD59895.1	immunoglobulin mu heavy chain constant region, partial [Salmo salar]	100	XP_014058600.1	PREDICTED: uncharacterized protein LOC106606767 [Salmo salar]	428	XP_014058600.1	PREDICTED: uncharacterized protein LOC106606767 [Salmo salar]	737.643	XP_014058600.1	PREDICTED: uncharacterized protein LOC106606767 [Salmo salar]
Hk_0000446	593	0	XP_014058600.1	PREDICTED: uncharacterized protein LOC106606767 [Salmo salar]	100	ADD59895.1	immunoglobulin mu heavy chain constant region, partial [Salmo salar]	100	XP_014058600.1	PREDICTED: uncharacterized protein LOC106606767 [Salmo salar]	428	XP_014058600.1	PREDICTED: uncharacterized protein LOC106606767 [Salmo salar]	737.643	XP_014058600.1	PREDICTED: uncharacterized protein LOC106606767 [Salmo salar]
Hk_0000447	586	0	XP_014058600.1	PREDICTED: uncharacterized protein LOC106606767 [Salmo salar]	100	ADD59895.1	immunoglobulin mu heavy chain constant region, partial [Salmo salar]	100	XP_014058600.1	PREDICTED: uncharacterized protein LOC106606767 [Salmo salar]	428	XP_014058600.1	PREDICTED: uncharacterized protein LOC106606767 [Salmo salar]	737.643	XP_014058600.1	PREDICTED: uncharacterized protein LOC106606767 [Salmo salar]
Hk_0000448	586	0	XP_014058600.1	PREDICTED: uncharacterized protein LOC106606767 [Salmo salar]	100	ADD59895.1	immunoglobulin mu heavy chain constant region, partial [Salmo salar]	100	XP_014058600.1	PREDICTED: uncharacterized protein LOC106606767 [Salmo salar]	428	XP_014058600.1	PREDICTED: uncharacterized protein LOC106606767 [Salmo salar]	737.643	XP_014058600.1	PREDICTED: uncharacterized protein LOC106606767 [Salmo salar]
Hk_0000449	578	0	XP_014058600.1	PREDICTED: uncharacterized protein LOC106606767 [Salmo salar]	100	ADD59895.1	immunoglobulin mu heavy chain constant region, partial [Salmo salar]	100	XP_014058600.1	PREDICTED: uncharacterized protein LOC106606767 [Salmo salar]	428	XP_014058600.1	PREDICTED: uncharacterized protein LOC106606767 [Salmo salar]	737.643	XP_014058600.1	PREDICTED: uncharacterized protein LOC106606767 [Salmo salar]
Hk_0000450	538	2.79562e-37	XP_013980829.1	PREDICTED: uncharacterized protein LOC106561408 [Salmo salar]	82.8571	XP_014041575.1	PREDICTED: zinc finger protein 883-like [Salmo salar]	88.5714	XP_014041575.1	PREDICTED: zinc finger protein 883-like [Salmo salar]	401	XP_014059589.1	PREDICTED: uncharacterized protein LOC106607296 isoform X1 [Salmo salar]	148.673	XP_013980829.1	PREDICTED: uncharacterized protein LOC106561408 [Salmo salar]
Hk_0000451	1964	1.44669e-115	AAB65430.1	beta actin [Salmo salar]	100	AAB65430.1	beta actin [Salmo salar]	100	AAB65430.1	beta actin [Salmo salar]	225	XP_014006054.1	PREDICTED: uncharacterized protein LOC106574600 [Salmo salar]	307.375	AAB65430.1	beta actin [Salmo salar]
Hk_0000452	1967	1.44977e-115	AAB65430.1	beta actin [Salmo salar]	100	AAB65430.1	beta actin [Salmo salar]	100	AAB65430.1	beta actin [Salmo salar]	225	XP_014006054.1	PREDICTED: uncharacterized protein LOC106574600 [Salmo salar]	307.375	AAB65430.1	beta actin [Salmo salar]
Hk_0000453	1962	1.44406e-115	AAB65430.1	beta actin [Salmo salar]	100	AAB65430.1	beta actin [Salmo salar]	100	AAB65430.1	beta actin [Salmo salar]	225	XP_014006054.1	PREDICTED: uncharacterized protein LOC106574600 [Salmo salar]	307.375	AAB65430.1	beta actin [Salmo salar]
Hk_0000454	1974	1.44252e-115	AAB65430.1	beta actin [Salmo salar]	100	AAB65430.1	beta actin [Salmo salar]	100	AAB65430.1	beta actin [Salmo salar]	225	XP_014006054.1	PREDICTED: uncharacterized protein LOC106574600 [Salmo salar]	307.375	AAB65430.1	beta actin [Salmo salar]
Hk_0000455	1974	1.44428e-115	AAB65430.1	beta actin [Salmo salar]	100	AAB65430.1	beta actin [Salmo salar]	100	AAB65430.1	beta actin [Salmo salar]	218	XP_014012833.1	PREDICTED: putative proline-rich protein 21 [Salmo salar]	307.375	AAB65430.1	beta actin [Salmo salar]
Hk_0000456	1977	1.44054e-115	AAB65430.1	beta actin [Salmo salar]	100	AAB65430.1	beta actin [Salmo salar]	100	AAB65430.1	beta actin [Salmo salar]	218	XP_014012833.1	PREDICTED: putative proline-rich protein 21 [Salmo salar]	307.375	AAB65430.1	beta actin [Salmo salar]
Hk_0000457	1976	1.45307e-115	AAB65430.1	beta actin [Salmo salar]	100	AAB65430.1	beta actin [Salmo salar]	100	AAB65430.1	beta actin [Salmo salar]	218	XP_014012833.1	PREDICTED: putative proline-rich protein 21 [Salmo salar]	307.375	AAB65430.1	beta actin [Salmo salar]
Hk_0000458	1976	1.44647e-115	AAB65430.1	beta actin [Salmo salar]	100	AAB65430.1	beta actin [Salmo salar]	100	AAB65430.1	beta actin [Salmo salar]	218	XP_014012833.1	PREDICTED: putative proline-rich protein 21 [Salmo salar]	307.375	AAB65430.1	beta actin [Salmo salar]
Hk_0000459	1977	1.44252e-115	AAB65430.1	beta actin [Salmo salar]	100	AAB65430.1	beta actin [Salmo salar]	100	AAB65430.1	beta actin [Salmo salar]	218	XP_014012833.1	PREDICTED: putative proline-rich protein 21 [Salmo salar]	307.375	AAB65430.1	beta actin [Salmo salar]
Hk_0000460	1976	1.44186e-115	AAB65430.1	beta actin [Salmo salar]	100	AAB65430.1	beta actin [Salmo salar]	100	AAB65430.1	beta actin [Salmo salar]	202	XP_014013262.1	PREDICTED: titin-like isoform X1 [Salmo salar]	307.375	AAB65430.1	beta actin [Salmo salar]
Hk_0000461	1976	1.48163e-115	AAB65430.1	beta actin [Salmo salar]	100	AAB65430.1	beta actin [Salmo salar]	100	AAB65430.1	beta actin [Salmo salar]	202	XP_014013262.1	PREDICTED: titin-like isoform X1 [Salmo salar]	307.375	AAB65430.1	beta actin [Salmo salar]
Hk_0000462	760	1.44494e-115	AAB65430.1	beta actin [Salmo salar]	100	AAB65430.1	beta actin [Salmo salar]	100	AAB65430.1	beta actin [Salmo salar]	186	XP_013980551.1	PREDICTED: actin-related protein 6 [Salmo salar]	307.375	AAB65430.1	beta actin [Salmo salar]
Hk_0000463	760	1.47592e-115	AAB65430.1	beta actin [Salmo salar]	100	AAB65430.1	beta actin [Salmo salar]	100	AAB65430.1	beta actin [Salmo salar]	186	XP_013980551.1	PREDICTED: actin-related protein 6 [Salmo salar]	307.375	AAB65430.1	beta actin [Salmo salar]
Hk_0000464	665	6.2291e-74	ACI66028.1	Transposable element Tcb1 transposase [Salmo salar]	100	XP_014043980.1	PREDICTED: collagen alpha-1(VI) chain-like [Salmo salar]	100	ACI68435.1	60S ribosomal protein L37a [Salmo salar]	337	XP_014030152.1	PREDICTED: uncharacterized protein LOC106586928 [Salmo salar]	252.677	ACI66028.1	Transposable element Tcb1 transposase [Salmo salar]
Hk_0000465	172	1.28715e-167	AKP40998.1	ORF2 protein [Salmo salar]	100	XP_014047128.1	PREDICTED: heterogeneous nuclear ribonucleoprotein C-like isoform X3 [Salmo salar]	100	ACI68435.1	60S ribosomal protein L37a [Salmo salar]	342	XP_014030152.1	PREDICTED: uncharacterized protein LOC106586928 [Salmo salar]	555.058	AKP40998.1	ORF2 protein [Salmo salar]
Hk_0000466	161	1.28942e-167	AKP40998.1	ORF2 protein [Salmo salar]	100	XP_014047128.1	PREDICTED: heterogeneous nuclear ribonucleoprotein C-like isoform X3 [Salmo salar]	100	ACI68435.1	60S ribosomal protein L37a [Salmo salar]	346	XP_014030152.1	PREDICTED: uncharacterized protein LOC106586928 [Salmo salar]	555.058	AKP40998.1	ORF2 protein [Salmo salar]
Hk_0000467	250	6.05257e-63	ABV31710.1	transposase [Salmo salar]	100	ACN09973.1	40S ribosomal protein S28 [Salmo salar]	100	ACN09973.1	40S ribosomal protein S28 [Salmo salar]	177	ACN11475.1	Transposable element Tcb1 transposase [Salmo salar]	173.326	ABV31710.1	transposase [Salmo salar]
Hk_0000468	226	5.65732e-84	ACN11475.1	Transposable element Tcb1 transposase [Salmo salar]	100	XP_014045492.1	PREDICTED: dipeptidyl peptidase 9-like isoform X1 [Salmo salar]	100	XP_014045492.1	PREDICTED: dipeptidyl peptidase 9-like isoform X1 [Salmo salar]	276	ACH85309.1	transposase-like [Salmo salar]	280.796	ACN11475.1	Transposable element Tcb1 transposase [Salmo salar]
Hk_0000469	247	5.69481e-84	ACN11475.1	Transposable element Tcb1 transposase [Salmo salar]	100	XP_014045492.1	PREDICTED: dipeptidyl peptidase 9-like isoform X1 [Salmo salar]	100	XP_014045492.1	PREDICTED: dipeptidyl peptidase 9-like isoform X1 [Salmo salar]	276	ACH85309.1	transposase-like [Salmo salar]	280.796	ACN11475.1	Transposable element Tcb1 transposase [Salmo salar]
Hk_0000470	262	5.65906e-84	ACN11475.1	Transposable element Tcb1 transposase [Salmo salar]	100	XP_014045492.1	PREDICTED: dipeptidyl peptidase 9-like isoform X1 [Salmo salar]	100	XP_014045492.1	PREDICTED: dipeptidyl peptidase 9-like isoform X1 [Salmo salar]	276	ACH85309.1	transposase-like [Salmo salar]	280.796	ACN11475.1	Transposable element Tcb1 transposase [Salmo salar]
Hk_0000471	164	1.31444e-157	ABV31711.1	transposase [Salmo salar]	100	XP_013989248.1	PREDICTED: zinc finger protein 454-like [Salmo salar]	100	XP_013989248.1	PREDICTED: zinc finger protein 454-like [Salmo salar]	270	ABV31711.1	transposase [Salmo salar]	493.812	ABV31711.1	transposase [Salmo salar]
Hk_0000472	164	1.3905e-157	ABV31711.1	transposase [Salmo salar]	100	XP_013989248.1	PREDICTED: zinc finger protein 454-like [Salmo salar]	100	XP_013989248.1	PREDICTED: zinc finger protein 454-like [Salmo salar]	270	ABV31711.1	transposase [Salmo salar]	493.812	ABV31711.1	transposase [Salmo salar]
Hk_0000473	293	6.83755e-36	ABQ01985.1	collagen Type XI Alpha2 [Salmo salar]	89.1892	XP_013996492.1	PREDICTED: yjeF N-terminal domain-containing protein 3-like [Salmo salar]	97.2973	ABQ01985.1	collagen Type XI Alpha2 [Salmo salar]	171	AKP40998.1	ORF2 protein [Salmo salar]	130.568	XP_014040395.1	PREDICTED: uncharacterized protein LOC106593572 isoform X1 [Salmo salar]
Hk_0000474	504	2.88777e-118	XP_014055583.1	PREDICTED: fibroblast growth factor receptor-like 1 isoform X1 [Salmo salar]	100	ACH70808.1	ribosomal protein L19 [Salmo salar]	100	XP_014051178.1	PREDICTED: sodium-dependent phosphate transport protein 2A-like [Salmo salar]	466	XP_014065551.1	PREDICTED: transposon Tf2-1 polyprotein [Salmo salar]	402.134	XP_014055583.1	PREDICTED: fibroblast growth factor receptor-like 1 isoform X1 [Salmo salar]
Hk_0000475	499	5.33954e-118	XP_014055583.1	PREDICTED: fibroblast growth factor receptor-like 1 isoform X1 [Salmo salar]	100	ACH70808.1	ribosomal protein L19 [Salmo salar]	100	XP_014051178.1	PREDICTED: sodium-dependent phosphate transport protein 2A-like [Salmo salar]	466	ACN60195.1	Retrotransposable element Tf2 155 kDa protein type 3, partial [Salmo salar]	401.364	XP_014055583.1	PREDICTED: fibroblast growth factor receptor-like 1 isoform X1 [Salmo salar]
Hk_0000476	473	2.3288e-101	AEB77813.1	olfactory receptor family C subfamily 2 member 2 [Salmo salar]	100	ACH70808.1	ribosomal protein L19 [Salmo salar]	100	XP_014051178.1	PREDICTED: sodium-dependent phosphate transport protein 2A-like [Salmo salar]	358	XP_013990514.1	PREDICTED: uncharacterized protein K02A2.6-like isoform X1 [Salmo salar]	308.531	XP_014055583.1	PREDICTED: fibroblast growth factor receptor-like 1 isoform X1 [Salmo salar]
Hk_0000477	449	2.3288e-101	AEB77813.1	olfactory receptor family C subfamily 2 member 2 [Salmo salar]	100	ACH70808.1	ribosomal protein L19 [Salmo salar]	100	XP_014051178.1	PREDICTED: sodium-dependent phosphate transport protein 2A-like [Salmo salar]	358	XP_013990514.1	PREDICTED: uncharacterized protein K02A2.6-like isoform X1 [Salmo salar]	264.233	AEB77813.1	olfactory receptor family C subfamily 2 member 2 [Salmo salar]
Hk_0000478	714	0	XP_013984347.1	PREDICTED: uncharacterized protein K02A2.6-like [Salmo salar]	100	XP_014048550.1	PREDICTED: apoptosis regulator BAX-like [Salmo salar]	100	XP_014048550.1	PREDICTED: apoptosis regulator BAX-like [Salmo salar]	768	XP_014068056.1	PREDICTED: uncharacterized protein LOC106611918 [Salmo salar]	1265.75	XP_013984347.1	PREDICTED: uncharacterized protein K02A2.6-like [Salmo salar]
Hk_0000479	640	0	XP_013984347.1	PREDICTED: uncharacterized protein K02A2.6-like [Salmo salar]	100	XP_014048550.1	PREDICTED: apoptosis regulator BAX-like [Salmo salar]	100	XP_014048550.1	PREDICTED: apoptosis regulator BAX-like [Salmo salar]	768	XP_014068056.1	PREDICTED: uncharacterized protein LOC106611918 [Salmo salar]	1265.75	XP_013984347.1	PREDICTED: uncharacterized protein K02A2.6-like [Salmo salar]
Hk_0000480	631	0	XP_013984347.1	PREDICTED: uncharacterized protein K02A2.6-like [Salmo salar]	100	XP_014048550.1	PREDICTED: apoptosis regulator BAX-like [Salmo salar]	100	XP_014048550.1	PREDICTED: apoptosis regulator BAX-like [Salmo salar]	768	XP_014068056.1	PREDICTED: uncharacterized protein LOC106611918 [Salmo salar]	1265.75	XP_013984347.1	PREDICTED: uncharacterized protein K02A2.6-like [Salmo salar]
Hk_0000481	626	0	XP_013984347.1	PREDICTED: uncharacterized protein K02A2.6-like [Salmo salar]	100	XP_014048550.1	PREDICTED: apoptosis regulator BAX-like [Salmo salar]	100	XP_014048550.1	PREDICTED: apoptosis regulator BAX-like [Salmo salar]	768	XP_014068056.1	PREDICTED: uncharacterized protein LOC106611918 [Salmo salar]	1265.75	XP_013984347.1	PREDICTED: uncharacterized protein K02A2.6-like [Salmo salar]
Hk_0000482	968	7.35549e-73	XP_014059773.1	PREDICTED: hemoglobin subunit beta-1-like [Salmo salar]	100	XP_014048454.1	PREDICTED: hemoglobin subunit beta-1-like [Salmo salar]	100	XP_014048460.1	PREDICTED: uncharacterized protein LOC106601081 [Salmo salar]	145	XP_014059773.1	PREDICTED: hemoglobin subunit beta-1-like [Salmo salar]	243.432	XP_014059773.1	PREDICTED: hemoglobin subunit beta-1-like [Salmo salar]
Hk_0000483	1076	7.33447e-73	XP_014059773.1	PREDICTED: hemoglobin subunit beta-1-like [Salmo salar]	100	XP_014048460.1	PREDICTED: uncharacterized protein LOC106601081 [Salmo salar]	100	XP_014048460.1	PREDICTED: uncharacterized protein LOC106601081 [Salmo salar]	145	XP_014059773.1	PREDICTED: hemoglobin subunit beta-1-like [Salmo salar]	243.432	XP_014059773.1	PREDICTED: hemoglobin subunit beta-1-like [Salmo salar]
Hk_0000484	1083	7.31676e-73	XP_014059773.1	PREDICTED: hemoglobin subunit beta-1-like [Salmo salar]	100	XP_014048454.1	PREDICTED: hemoglobin subunit beta-1-like [Salmo salar]	100	XP_014048454.1	PREDICTED: hemoglobin subunit beta-1-like [Salmo salar]	145	XP_014059773.1	PREDICTED: hemoglobin subunit beta-1-like [Salmo salar]	243.432	XP_014059773.1	PREDICTED: hemoglobin subunit beta-1-like [Salmo salar]
Hk_0000485	1085	7.34443e-73	XP_014059773.1	PREDICTED: hemoglobin subunit beta-1-like [Salmo salar]	100	XP_014048454.1	PREDICTED: hemoglobin subunit beta-1-like [Salmo salar]	100	XP_014048454.1	PREDICTED: hemoglobin subunit beta-1-like [Salmo salar]	145	XP_014059773.1	PREDICTED: hemoglobin subunit beta-1-like [Salmo salar]	243.432	XP_014059773.1	PREDICTED: hemoglobin subunit beta-1-like [Salmo salar]
Hk_0000486	1110	7.34553e-73	XP_014059773.1	PREDICTED: hemoglobin subunit beta-1-like [Salmo salar]	100	XP_014048454.1	PREDICTED: hemoglobin subunit beta-1-like [Salmo salar]	100	XP_014048454.1	PREDICTED: hemoglobin subunit beta-1-like [Salmo salar]	145	XP_014059773.1	PREDICTED: hemoglobin subunit beta-1-like [Salmo salar]	243.432	XP_014059773.1	PREDICTED: hemoglobin subunit beta-1-like [Salmo salar]
Hk_0000487	1099	7.37541e-73	XP_014059773.1	PREDICTED: hemoglobin subunit beta-1-like [Salmo salar]	100	XP_014000768.1	PREDICTED: zinc finger protein 436-like [Salmo salar]	100	XP_014000768.1	PREDICTED: zinc finger protein 436-like [Salmo salar]	145	XP_014059773.1	PREDICTED: hemoglobin subunit beta-1-like [Salmo salar]	243.432	XP_014059773.1	PREDICTED: hemoglobin subunit beta-1-like [Salmo salar]
Hk_0000488	1124	7.36213e-73	XP_014059773.1	PREDICTED: hemoglobin subunit beta-1-like [Salmo salar]	100	XP_014000768.1	PREDICTED: zinc finger protein 436-like [Salmo salar]	100	XP_014000768.1	PREDICTED: zinc finger protein 436-like [Salmo salar]	191	XP_014026699.1	PREDICTED: LOW QUALITY PROTEIN: uncharacterized protein LOC106585230 [Salmo salar]	243.432	XP_014059773.1	PREDICTED: hemoglobin subunit beta-1-like [Salmo salar]
Hk_0000489	1188	0	XP_014000059.1	PREDICTED: uncharacterized protein LOC106571454 [Salmo salar]	100	XP_014000768.1	PREDICTED: zinc finger protein 436-like [Salmo salar]	100	XP_014000768.1	PREDICTED: zinc finger protein 436-like [Salmo salar]	327	XP_014000059.1	PREDICTED: uncharacterized protein LOC106571454 [Salmo salar]	649.432	XP_014000059.1	PREDICTED: uncharacterized protein LOC106571454 [Salmo salar]
Hk_0000490	1167	0	XP_014000059.1	PREDICTED: uncharacterized protein LOC106571454 [Salmo salar]	100	XP_014000768.1	PREDICTED: zinc finger protein 436-like [Salmo salar]	100	XP_014000768.1	PREDICTED: zinc finger protein 436-like [Salmo salar]	327	XP_014000059.1	PREDICTED: uncharacterized protein LOC106571454 [Salmo salar]	649.432	XP_014000059.1	PREDICTED: uncharacterized protein LOC106571454 [Salmo salar]
Hk_0000491	1167	0	XP_014000059.1	PREDICTED: uncharacterized protein LOC106571454 [Salmo salar]	100	XP_014000768.1	PREDICTED: zinc finger protein 436-like [Salmo salar]	100	XP_014000768.1	PREDICTED: zinc finger protein 436-like [Salmo salar]	327	XP_014000059.1	PREDICTED: uncharacterized protein LOC106571454 [Salmo salar]	649.432	XP_014000059.1	PREDICTED: uncharacterized protein LOC106571454 [Salmo salar]
Hk_0000492	1166	0	XP_014000059.1	PREDICTED: uncharacterized protein LOC106571454 [Salmo salar]	100	XP_014000768.1	PREDICTED: zinc finger protein 436-like [Salmo salar]	100	XP_014000768.1	PREDICTED: zinc finger protein 436-like [Salmo salar]	327	XP_014000059.1	PREDICTED: uncharacterized protein LOC106571454 [Salmo salar]	649.432	XP_014000059.1	PREDICTED: uncharacterized protein LOC106571454 [Salmo salar]
Hk_0000493	1190	0	XP_014000059.1	PREDICTED: uncharacterized protein LOC106571454 [Salmo salar]	100	XP_014000768.1	PREDICTED: zinc finger protein 436-like [Salmo salar]	100	XP_014000768.1	PREDICTED: zinc finger protein 436-like [Salmo salar]	327	XP_014000059.1	PREDICTED: uncharacterized protein LOC106571454 [Salmo salar]	649.432	XP_014000059.1	PREDICTED: uncharacterized protein LOC106571454 [Salmo salar]
Hk_0000494	1166	0	XP_014000059.1	PREDICTED: uncharacterized protein LOC106571454 [Salmo salar]	100	XP_014000768.1	PREDICTED: zinc finger protein 436-like [Salmo salar]	100	XP_014000768.1	PREDICTED: zinc finger protein 436-like [Salmo salar]	327	XP_014000059.1	PREDICTED: uncharacterized protein LOC106571454 [Salmo salar]	649.432	XP_014000059.1	PREDICTED: uncharacterized protein LOC106571454 [Salmo salar]
Hk_0000495	1171	0	XP_014000059.1	PREDICTED: uncharacterized protein LOC106571454 [Salmo salar]	100	XP_014000768.1	PREDICTED: zinc finger protein 436-like [Salmo salar]	100	XP_014000768.1	PREDICTED: zinc finger protein 436-like [Salmo salar]	327	XP_014000059.1	PREDICTED: uncharacterized protein LOC106571454 [Salmo salar]	649.432	XP_014000059.1	PREDICTED: uncharacterized protein LOC106571454 [Salmo salar]
Hk_0000496	1170	0	XP_014000059.1	PREDICTED: uncharacterized protein LOC106571454 [Salmo salar]	100	XP_014000768.1	PREDICTED: zinc finger protein 436-like [Salmo salar]	100	XP_014000768.1	PREDICTED: zinc finger protein 436-like [Salmo salar]	327	XP_014000059.1	PREDICTED: uncharacterized protein LOC106571454 [Salmo salar]	649.432	XP_014000059.1	PREDICTED: uncharacterized protein LOC106571454 [Salmo salar]
Hk_0000497	1170	0	XP_014000059.1	PREDICTED: uncharacterized protein LOC106571454 [Salmo salar]	100	XP_014000768.1	PREDICTED: zinc finger protein 436-like [Salmo salar]	100	XP_014000768.1	PREDICTED: zinc finger protein 436-like [Salmo salar]	327	XP_014000059.1	PREDICTED: uncharacterized protein LOC106571454 [Salmo salar]	649.432	XP_014000059.1	PREDICTED: uncharacterized protein LOC106571454 [Salmo salar]
Hk_0000498	1169	0	XP_014000059.1	PREDICTED: uncharacterized protein LOC106571454 [Salmo salar]	100	XP_014000768.1	PREDICTED: zinc finger protein 436-like [Salmo salar]	100	XP_014000768.1	PREDICTED: zinc finger protein 436-like [Salmo salar]	327	XP_014000059.1	PREDICTED: uncharacterized protein LOC106571454 [Salmo salar]	649.432	XP_014000059.1	PREDICTED: uncharacterized protein LOC106571454 [Salmo salar]
Hk_0000499	1191	0	XP_014000059.1	PREDICTED: uncharacterized protein LOC106571454 [Salmo salar]	100	XP_014000768.1	PREDICTED: zinc finger protein 436-like [Salmo salar]	100	XP_014000768.1	PREDICTED: zinc finger protein 436-like [Salmo salar]	327	XP_014000059.1	PREDICTED: uncharacterized protein LOC106571454 [Salmo salar]	649.432	XP_014000059.1	PREDICTED: uncharacterized protein LOC106571454 [Salmo salar]
Hk_0000500	1170	0	XP_014000059.1	PREDICTED: uncharacterized protein LOC106571454 [Salmo salar]	100	XP_014000768.1	PREDICTED: zinc finger protein 436-like [Salmo salar]	100	XP_014000768.1	PREDICTED: zinc finger protein 436-like [Salmo salar]	327	XP_014000059.1	PREDICTED: uncharacterized protein LOC106571454 [Salmo salar]	649.432	XP_014000059.1	PREDICTED: uncharacterized protein LOC106571454 [Salmo salar]
Hk_0000501	1170	0	XP_014000059.1	PREDICTED: uncharacterized protein LOC106571454 [Salmo salar]	100	XP_014000768.1	PREDICTED: zinc finger protein 436-like [Salmo salar]	100	XP_014000768.1	PREDICTED: zinc finger protein 436-like [Salmo salar]	327	XP_014000059.1	PREDICTED: uncharacterized protein LOC106571454 [Salmo salar]	649.432	XP_014000059.1	PREDICTED: uncharacterized protein LOC106571454 [Salmo salar]
Hk_0000502	648	2.50055e-119	XP_014011510.1	PREDICTED: RNA-directed DNA polymerase homolog [Salmo salar]	100	CAA65953.1	beta-globin [Salmo salar]	100	CAA65953.1	beta-globin [Salmo salar]	340	ABV31710.1	transposase [Salmo salar]	398.282	XP_014021308.1	PREDICTED: uncharacterized protein LOC106582599 [Salmo salar]
Hk_0000503	648	1.37692e-142	XP_014021308.1	PREDICTED: uncharacterized protein LOC106582599 [Salmo salar]	100	CAA65953.1	beta-globin [Salmo salar]	100	CAA65953.1	beta-globin [Salmo salar]	340	ABV31710.1	transposase [Salmo salar]	466.848	XP_014021308.1	PREDICTED: uncharacterized protein LOC106582599 [Salmo salar]
Hk_0000504	642	1.08241e-143	XP_014019537.1	PREDICTED: uncharacterized protein LOC106581772, partial [Salmo salar]	100	CAA65953.1	beta-globin [Salmo salar]	100	CAA65953.1	beta-globin [Salmo salar]	343	XP_014067472.1	PREDICTED: uncharacterized protein LOC106611608 [Salmo salar]	466.848	XP_014021308.1	PREDICTED: uncharacterized protein LOC106582599 [Salmo salar]
Hk_0000505	670	1.16816e-143	XP_014019537.1	PREDICTED: uncharacterized protein LOC106581772, partial [Salmo salar]	100	CAA65953.1	beta-globin [Salmo salar]	100	CAA65953.1	beta-globin [Salmo salar]	343	XP_014067472.1	PREDICTED: uncharacterized protein LOC106611608 [Salmo salar]	467.233	XP_014021308.1	PREDICTED: uncharacterized protein LOC106582599 [Salmo salar]
Hk_0000506	674	1.16835e-143	XP_014019537.1	PREDICTED: uncharacterized protein LOC106581772, partial [Salmo salar]	100	CAA65953.1	beta-globin [Salmo salar]	100	CAA65953.1	beta-globin [Salmo salar]	343	XP_014067472.1	PREDICTED: uncharacterized protein LOC106611608 [Salmo salar]	467.233	XP_014021308.1	PREDICTED: uncharacterized protein LOC106582599 [Salmo salar]
Hk_0000507	673	1.16948e-143	XP_014019537.1	PREDICTED: uncharacterized protein LOC106581772, partial [Salmo salar]	100	CAA65953.1	beta-globin [Salmo salar]	100	CAA65953.1	beta-globin [Salmo salar]	343	XP_014067472.1	PREDICTED: uncharacterized protein LOC106611608 [Salmo salar]	467.233	XP_014021308.1	PREDICTED: uncharacterized protein LOC106582599 [Salmo salar]
Hk_0000508	687	0	ACN60195.1	Retrotransposable element Tf2 155 kDa protein type 3, partial [Salmo salar]	100	CAA65953.1	beta-globin [Salmo salar]	100	CAA65953.1	beta-globin [Salmo salar]	499	ACN60195.1	Retrotransposable element Tf2 155 kDa protein type 3, partial [Salmo salar]	828.165	ACN60195.1	Retrotransposable element Tf2 155 kDa protein type 3, partial [Salmo salar]
Hk_0000509	687	0	ACN60195.1	Retrotransposable element Tf2 155 kDa protein type 3, partial [Salmo salar]	100	CAA65953.1	beta-globin [Salmo salar]	100	CAA65953.1	beta-globin [Salmo salar]	499	ACN60195.1	Retrotransposable element Tf2 155 kDa protein type 3, partial [Salmo salar]	828.165	ACN60195.1	Retrotransposable element Tf2 155 kDa protein type 3, partial [Salmo salar]
Hk_0000510	688	0	ACN60195.1	Retrotransposable element Tf2 155 kDa protein type 3, partial [Salmo salar]	100	CAA65953.1	beta-globin [Salmo salar]	100	CAA65953.1	beta-globin [Salmo salar]	499	ACN60195.1	Retrotransposable element Tf2 155 kDa protein type 3, partial [Salmo salar]	828.165	ACN60195.1	Retrotransposable element Tf2 155 kDa protein type 3, partial [Salmo salar]
Hk_0000511	688	0	ACN60195.1	Retrotransposable element Tf2 155 kDa protein type 3, partial [Salmo salar]	100	CAA65953.1	beta-globin [Salmo salar]	100	CAA65953.1	beta-globin [Salmo salar]	499	ACN60195.1	Retrotransposable element Tf2 155 kDa protein type 3, partial [Salmo salar]	828.165	ACN60195.1	Retrotransposable element Tf2 155 kDa protein type 3, partial [Salmo salar]
Hk_0000512	688	0	ACN60195.1	Retrotransposable element Tf2 155 kDa protein type 3, partial [Salmo salar]	100	CAA65953.1	beta-globin [Salmo salar]	100	CAA65953.1	beta-globin [Salmo salar]	499	ACN60195.1	Retrotransposable element Tf2 155 kDa protein type 3, partial [Salmo salar]	828.165	ACN60195.1	Retrotransposable element Tf2 155 kDa protein type 3, partial [Salmo salar]
Hk_0000513	688	0	ACN60195.1	Retrotransposable element Tf2 155 kDa protein type 3, partial [Salmo salar]	100	CAA65953.1	beta-globin [Salmo salar]	100	CAA65953.1	beta-globin [Salmo salar]	499	ACN60195.1	Retrotransposable element Tf2 155 kDa protein type 3, partial [Salmo salar]	828.165	ACN60195.1	Retrotransposable element Tf2 155 kDa protein type 3, partial [Salmo salar]
Hk_0000514	828	0	ACN60195.1	Retrotransposable element Tf2 155 kDa protein type 3, partial [Salmo salar]	100	ACI69922.1	Hemoglobin subunit beta-1 [Salmo salar]	100	ACI69922.1	Hemoglobin subunit beta-1 [Salmo salar]	499	ACN60195.1	Retrotransposable element Tf2 155 kDa protein type 3, partial [Salmo salar]	828.165	ACN60195.1	Retrotransposable element Tf2 155 kDa protein type 3, partial [Salmo salar]
Hk_0000515	916	6.20006e-72	XP_014059773.1	PREDICTED: hemoglobin subunit beta-1-like [Salmo salar]	100	ACI69922.1	Hemoglobin subunit beta-1 [Salmo salar]	100	ACI69922.1	Hemoglobin subunit beta-1 [Salmo salar]	145	XP_014059773.1	PREDICTED: hemoglobin subunit beta-1-like [Salmo salar]	240.736	XP_014059773.1	PREDICTED: hemoglobin subunit beta-1-like [Salmo salar]
Hk_0000516	915	6.15999e-72	XP_014059773.1	PREDICTED: hemoglobin subunit beta-1-like [Salmo salar]	100	ACI69922.1	Hemoglobin subunit beta-1 [Salmo salar]	100	ACI69922.1	Hemoglobin subunit beta-1 [Salmo salar]	145	XP_014059773.1	PREDICTED: hemoglobin subunit beta-1-like [Salmo salar]	240.736	XP_014059773.1	PREDICTED: hemoglobin subunit beta-1-like [Salmo salar]
Hk_0000517	915	6.15346e-72	XP_014059773.1	PREDICTED: hemoglobin subunit beta-1-like [Salmo salar]	100	ACI69922.1	Hemoglobin subunit beta-1 [Salmo salar]	100	ACI69922.1	Hemoglobin subunit beta-1 [Salmo salar]	145	XP_014059773.1	PREDICTED: hemoglobin subunit beta-1-like [Salmo salar]	240.736	XP_014059773.1	PREDICTED: hemoglobin subunit beta-1-like [Salmo salar]
Hk_0000518	913	6.18515e-72	XP_014059773.1	PREDICTED: hemoglobin subunit beta-1-like [Salmo salar]	100	ACI69922.1	Hemoglobin subunit beta-1 [Salmo salar]	100	ACI69922.1	Hemoglobin subunit beta-1 [Salmo salar]	145	XP_014059773.1	PREDICTED: hemoglobin subunit beta-1-like [Salmo salar]	240.736	XP_014059773.1	PREDICTED: hemoglobin subunit beta-1-like [Salmo salar]
Hk_0000519	976	6.16092e-72	XP_014059773.1	PREDICTED: hemoglobin subunit beta-1-like [Salmo salar]	100	ACI69922.1	Hemoglobin subunit beta-1 [Salmo salar]	100	ACI69922.1	Hemoglobin subunit beta-1 [Salmo salar]	237	ABV31710.1	transposase [Salmo salar]	240.736	XP_014059773.1	PREDICTED: hemoglobin subunit beta-1-like [Salmo salar]
Hk_0000520	978	6.1516e-72	XP_014059773.1	PREDICTED: hemoglobin subunit beta-1-like [Salmo salar]	100	ACI69922.1	Hemoglobin subunit beta-1 [Salmo salar]	100	ACI69922.1	Hemoglobin subunit beta-1 [Salmo salar]	237	ABV31710.1	transposase [Salmo salar]	240.736	XP_014059773.1	PREDICTED: hemoglobin subunit beta-1-like [Salmo salar]
Hk_0000521	986	6.15067e-72	XP_014059773.1	PREDICTED: hemoglobin subunit beta-1-like [Salmo salar]	100	ACI69922.1	Hemoglobin subunit beta-1 [Salmo salar]	100	ACI69922.1	Hemoglobin subunit beta-1 [Salmo salar]	237	ABV31710.1	transposase [Salmo salar]	240.736	XP_014059773.1	PREDICTED: hemoglobin subunit beta-1-like [Salmo salar]
Hk_0000522	986	6.16651e-72	XP_014059773.1	PREDICTED: hemoglobin subunit beta-1-like [Salmo salar]	100	ACI69922.1	Hemoglobin subunit beta-1 [Salmo salar]	100	ACI69922.1	Hemoglobin subunit beta-1 [Salmo salar]	237	ABV31710.1	transposase [Salmo salar]	240.736	XP_014059773.1	PREDICTED: hemoglobin subunit beta-1-like [Salmo salar]
Hk_0000523	1013	6.15906e-72	XP_014059773.1	PREDICTED: hemoglobin subunit beta-1-like [Salmo salar]	100	ACI69922.1	Hemoglobin subunit beta-1 [Salmo salar]	100	XP_014059773.1	PREDICTED: hemoglobin subunit beta-1-like [Salmo salar]	237	ABV31710.1	transposase [Salmo salar]	240.736	XP_014059773.1	PREDICTED: hemoglobin subunit beta-1-like [Salmo salar]
Hk_0000524	1006	6.15346e-72	XP_014059773.1	PREDICTED: hemoglobin subunit beta-1-like [Salmo salar]	100	ACI69922.1	Hemoglobin subunit beta-1 [Salmo salar]	100	XP_014059773.1	PREDICTED: hemoglobin subunit beta-1-like [Salmo salar]	237	ABV31710.1	transposase [Salmo salar]	240.736	XP_014059773.1	PREDICTED: hemoglobin subunit beta-1-like [Salmo salar]
Hk_0000525	1003	6.14787e-72	XP_014059773.1	PREDICTED: hemoglobin subunit beta-1-like [Salmo salar]	100	ACI69922.1	Hemoglobin subunit beta-1 [Salmo salar]	100	XP_014059773.1	PREDICTED: hemoglobin subunit beta-1-like [Salmo salar]	237	ABV31710.1	transposase [Salmo salar]	240.736	XP_014059773.1	PREDICTED: hemoglobin subunit beta-1-like [Salmo salar]
Hk_0000526	1000	6.14694e-72	XP_014059773.1	PREDICTED: hemoglobin subunit beta-1-like [Salmo salar]	100	ACI69922.1	Hemoglobin subunit beta-1 [Salmo salar]	100	XP_014059773.1	PREDICTED: hemoglobin subunit beta-1-like [Salmo salar]	237	ABV31710.1	transposase [Salmo salar]	240.736	XP_014059773.1	PREDICTED: hemoglobin subunit beta-1-like [Salmo salar]
Hk_0000527	1000	6.14601e-72	XP_014059773.1	PREDICTED: hemoglobin subunit beta-1-like [Salmo salar]	100	ACI69922.1	Hemoglobin subunit beta-1 [Salmo salar]	100	XP_014059773.1	PREDICTED: hemoglobin subunit beta-1-like [Salmo salar]	237	ABV31710.1	transposase [Salmo salar]	240.736	XP_014059773.1	PREDICTED: hemoglobin subunit beta-1-like [Salmo salar]
Hk_0000528	1059	6.19913e-72	XP_014059773.1	PREDICTED: hemoglobin subunit beta-1-like [Salmo salar]	100	ACI69922.1	Hemoglobin subunit beta-1 [Salmo salar]	100	XP_014059773.1	PREDICTED: hemoglobin subunit beta-1-like [Salmo salar]	237	ABV31710.1	transposase [Salmo salar]	240.736	XP_014059773.1	PREDICTED: hemoglobin subunit beta-1-like [Salmo salar]
Hk_0000529	816	3.81488e-64	ACN09994.1	Hemoglobin subunit alpha-4 [Salmo salar]	100	ACN09994.1	Hemoglobin subunit alpha-4 [Salmo salar]	100	ACN09994.1	Hemoglobin subunit alpha-4 [Salmo salar]	275	XP_013998656.1	PREDICTED: early nodulin-75-like [Salmo salar]	218.394	ACN09994.1	Hemoglobin subunit alpha-4 [Salmo salar]
Hk_0000530	830	1.75862e-80	ABV31711.1	transposase [Salmo salar]	100	ACN09994.1	Hemoglobin subunit alpha-4 [Salmo salar]	100	ACN09994.1	Hemoglobin subunit alpha-4 [Salmo salar]	275	XP_013998656.1	PREDICTED: early nodulin-75-like [Salmo salar]	272.707	ABV31711.1	transposase [Salmo salar]
Hk_0000531	840	6.0897e-138	ABV31711.1	transposase [Salmo salar]	100	ACN09994.1	Hemoglobin subunit alpha-4 [Salmo salar]	100	ACN09994.1	Hemoglobin subunit alpha-4 [Salmo salar]	275	XP_013998656.1	PREDICTED: early nodulin-75-like [Salmo salar]	437.573	ABV31711.1	transposase [Salmo salar]
Hk_0000532	513	6.32424e-90	XP_014062993.1	PREDICTED: uncharacterized protein LOC106609103 isoform X3 [Salmo salar]	100	XP_014048427.1	PREDICTED: hemoglobin subunit beta-like [Salmo salar]	100	XP_014048449.1	PREDICTED: hemoglobin subunit beta-like [Salmo salar]	211	XP_014069719.1	PREDICTED: olfactory receptor 11A1-like [Salmo salar]	189.504	CAA65945.1	beta-globin [Salmo salar]
Hk_0000533	516	6.29843e-90	XP_014062993.1	PREDICTED: uncharacterized protein LOC106609103 isoform X3 [Salmo salar]	100	XP_014048427.1	PREDICTED: hemoglobin subunit beta-like [Salmo salar]	100	XP_014048449.1	PREDICTED: hemoglobin subunit beta-like [Salmo salar]	211	XP_014069719.1	PREDICTED: olfactory receptor 11A1-like [Salmo salar]	189.504	CAA65945.1	beta-globin [Salmo salar]
Hk_0000534	548	6.29843e-90	XP_014062993.1	PREDICTED: uncharacterized protein LOC106609103 isoform X3 [Salmo salar]	100	XP_014048427.1	PREDICTED: hemoglobin subunit beta-like [Salmo salar]	100	XP_014048449.1	PREDICTED: hemoglobin subunit beta-like [Salmo salar]	211	XP_014069719.1	PREDICTED: olfactory receptor 11A1-like [Salmo salar]	189.504	CAA65945.1	beta-globin [Salmo salar]
Hk_0000535	563	6.3099e-90	XP_014062993.1	PREDICTED: uncharacterized protein LOC106609103 isoform X3 [Salmo salar]	100	XP_014048427.1	PREDICTED: hemoglobin subunit beta-like [Salmo salar]	100	XP_014048449.1	PREDICTED: hemoglobin subunit beta-like [Salmo salar]	211	XP_014069719.1	PREDICTED: olfactory receptor 11A1-like [Salmo salar]	189.504	CAA65945.1	beta-globin [Salmo salar]
Hk_0000536	212	3.45812e-71	ABV31710.1	transposase [Salmo salar]	100	XP_014048814.1	PREDICTED: von Willebrand factor C domain-containing protein 2-like [Salmo salar]	100	XP_014048814.1	PREDICTED: von Willebrand factor C domain-containing protein 2-like [Salmo salar]	340	ABV31710.1	transposase [Salmo salar]	246.514	ABV31710.1	transposase [Salmo salar]
Hk_0000537	223	3.4662e-71	ABV31710.1	transposase [Salmo salar]	100	XP_014048814.1	PREDICTED: von Willebrand factor C domain-containing protein 2-like [Salmo salar]	100	XP_014048814.1	PREDICTED: von Willebrand factor C domain-containing protein 2-like [Salmo salar]	340	ABV31710.1	transposase [Salmo salar]	246.514	ABV31710.1	transposase [Salmo salar]
Hk_0000538	223	3.46727e-71	ABV31710.1	transposase [Salmo salar]	100	XP_014048814.1	PREDICTED: von Willebrand factor C domain-containing protein 2-like [Salmo salar]	100	XP_014048814.1	PREDICTED: von Willebrand factor C domain-containing protein 2-like [Salmo salar]	340	ABV31710.1	transposase [Salmo salar]	246.514	ABV31710.1	transposase [Salmo salar]
Hk_0000539	402	5.20142e-75	ACH85333.1	ribosomal protein L3-like [Salmo salar]	100	ACH85333.1	ribosomal protein L3-like [Salmo salar]	100	ACH85333.1	ribosomal protein L3-like [Salmo salar]	337	ABV31710.1	transposase [Salmo salar]	253.832	ACH85333.1	ribosomal protein L3-like [Salmo salar]
Hk_0000540	402	5.20302e-75	ACH85333.1	ribosomal protein L3-like [Salmo salar]	100	ACH85333.1	ribosomal protein L3-like [Salmo salar]	100	ACH85333.1	ribosomal protein L3-like [Salmo salar]	337	ABV31710.1	transposase [Salmo salar]	253.832	ACH85333.1	ribosomal protein L3-like [Salmo salar]
Hk_0000541	402	5.20142e-75	ACH85333.1	ribosomal protein L3-like [Salmo salar]	100	ACH85333.1	ribosomal protein L3-like [Salmo salar]	100	ACH85333.1	ribosomal protein L3-like [Salmo salar]	337	ABV31710.1	transposase [Salmo salar]	253.832	ACH85333.1	ribosomal protein L3-like [Salmo salar]
Hk_0000542	402	5.20702e-75	ACH85333.1	ribosomal protein L3-like [Salmo salar]	100	ACH85333.1	ribosomal protein L3-like [Salmo salar]	100	ACH85333.1	ribosomal protein L3-like [Salmo salar]	337	ABV31710.1	transposase [Salmo salar]	253.832	ACH85333.1	ribosomal protein L3-like [Salmo salar]
Hk_0000543	402	5.20943e-75	ACH85333.1	ribosomal protein L3-like [Salmo salar]	100	ACH85333.1	ribosomal protein L3-like [Salmo salar]	100	ACH85333.1	ribosomal protein L3-like [Salmo salar]	337	ABV31710.1	transposase [Salmo salar]	253.832	ACH85333.1	ribosomal protein L3-like [Salmo salar]
Hk_0000544	402	5.20382e-75	ACH85333.1	ribosomal protein L3-like [Salmo salar]	100	ACH85333.1	ribosomal protein L3-like [Salmo salar]	100	ACH85333.1	ribosomal protein L3-like [Salmo salar]	337	ABV31710.1	transposase [Salmo salar]	253.832	ACH85333.1	ribosomal protein L3-like [Salmo salar]
Hk_0000545	411	0	XP_014049330.1	PREDICTED: RUN domain-containing protein 1-like isoform X1 [Salmo salar]	100	XP_014058874.1	PREDICTED: RUN domain-containing protein 1-like [Salmo salar]	100	XP_014049330.1	PREDICTED: RUN domain-containing protein 1-like isoform X1 [Salmo salar]	287	XP_014049330.1	PREDICTED: RUN domain-containing protein 1-like isoform X1 [Salmo salar]	599.742	XP_014049330.1	PREDICTED: RUN domain-containing protein 1-like isoform X1 [Salmo salar]
Hk_0000546	433	0	XP_014049330.1	PREDICTED: RUN domain-containing protein 1-like isoform X1 [Salmo salar]	100	XP_014058874.1	PREDICTED: RUN domain-containing protein 1-like [Salmo salar]	100	XP_014049330.1	PREDICTED: RUN domain-containing protein 1-like isoform X1 [Salmo salar]	287	XP_014049330.1	PREDICTED: RUN domain-containing protein 1-like isoform X1 [Salmo salar]	599.742	XP_014049330.1	PREDICTED: RUN domain-containing protein 1-like isoform X1 [Salmo salar]
Hk_0000547	339	0	XP_014049330.1	PREDICTED: RUN domain-containing protein 1-like isoform X1 [Salmo salar]	100	XP_014058874.1	PREDICTED: RUN domain-containing protein 1-like [Salmo salar]	100	XP_014049330.1	PREDICTED: RUN domain-containing protein 1-like isoform X1 [Salmo salar]	287	XP_014049330.1	PREDICTED: RUN domain-containing protein 1-like isoform X1 [Salmo salar]	599.742	XP_014049330.1	PREDICTED: RUN domain-containing protein 1-like isoform X1 [Salmo salar]
Hk_0000548	598	0	XP_014058600.1	PREDICTED: uncharacterized protein LOC106606767 [Salmo salar]	100	ADD59895.1	immunoglobulin mu heavy chain constant region, partial [Salmo salar]	100	XP_014058600.1	PREDICTED: uncharacterized protein LOC106606767 [Salmo salar]	428	XP_014058600.1	PREDICTED: uncharacterized protein LOC106606767 [Salmo salar]	737.643	XP_014058600.1	PREDICTED: uncharacterized protein LOC106606767 [Salmo salar]
Hk_0000549	592	0	XP_014058600.1	PREDICTED: uncharacterized protein LOC106606767 [Salmo salar]	100	ADD59895.1	immunoglobulin mu heavy chain constant region, partial [Salmo salar]	100	XP_014058600.1	PREDICTED: uncharacterized protein LOC106606767 [Salmo salar]	428	XP_014058600.1	PREDICTED: uncharacterized protein LOC106606767 [Salmo salar]	737.643	XP_014058600.1	PREDICTED: uncharacterized protein LOC106606767 [Salmo salar]
Hk_0000550	586	0	XP_014058600.1	PREDICTED: uncharacterized protein LOC106606767 [Salmo salar]	100	ADD59895.1	immunoglobulin mu heavy chain constant region, partial [Salmo salar]	100	XP_014058600.1	PREDICTED: uncharacterized protein LOC106606767 [Salmo salar]	428	XP_014058600.1	PREDICTED: uncharacterized protein LOC106606767 [Salmo salar]	737.643	XP_014058600.1	PREDICTED: uncharacterized protein LOC106606767 [Salmo salar]
Hk_0000551	584	0	XP_014058600.1	PREDICTED: uncharacterized protein LOC106606767 [Salmo salar]	100	ADD59895.1	immunoglobulin mu heavy chain constant region, partial [Salmo salar]	100	XP_014058600.1	PREDICTED: uncharacterized protein LOC106606767 [Salmo salar]	428	XP_014058600.1	PREDICTED: uncharacterized protein LOC106606767 [Salmo salar]	737.643	XP_014058600.1	PREDICTED: uncharacterized protein LOC106606767 [Salmo salar]
Hk_0000552	343	4.74978e-116	ABV31711.1	transposase [Salmo salar]	100	ACN09907.1	40S ribosomal protein S2 [Salmo salar]	100	ACN09907.1	40S ribosomal protein S2 [Salmo salar]	315	ABV31710.1	transposase [Salmo salar]	374.785	ABV31711.1	transposase [Salmo salar]
Hk_0000553	1964	1.44669e-115	AAB65430.1	beta actin [Salmo salar]	100	AAB65430.1	beta actin [Salmo salar]	100	AAB65430.1	beta actin [Salmo salar]	225	XP_014006054.1	PREDICTED: uncharacterized protein LOC106574600 [Salmo salar]	307.375	AAB65430.1	beta actin [Salmo salar]
Hk_0000554	1967	1.44977e-115	AAB65430.1	beta actin [Salmo salar]	100	AAB65430.1	beta actin [Salmo salar]	100	AAB65430.1	beta actin [Salmo salar]	225	XP_014006054.1	PREDICTED: uncharacterized protein LOC106574600 [Salmo salar]	307.375	AAB65430.1	beta actin [Salmo salar]
Hk_0000555	1962	1.4445e-115	AAB65430.1	beta actin [Salmo salar]	100	AAB65430.1	beta actin [Salmo salar]	100	AAB65430.1	beta actin [Salmo salar]	225	XP_014006054.1	PREDICTED: uncharacterized protein LOC106574600 [Salmo salar]	307.375	AAB65430.1	beta actin [Salmo salar]
Hk_0000556	1962	1.44054e-115	AAB65430.1	beta actin [Salmo salar]	100	AAB65430.1	beta actin [Salmo salar]	100	AAB65430.1	beta actin [Salmo salar]	225	XP_014006054.1	PREDICTED: uncharacterized protein LOC106574600 [Salmo salar]	307.375	AAB65430.1	beta actin [Salmo salar]
Hk_0000557	1974	1.44274e-115	AAB65430.1	beta actin [Salmo salar]	100	AAB65430.1	beta actin [Salmo salar]	100	AAB65430.1	beta actin [Salmo salar]	225	XP_014006054.1	PREDICTED: uncharacterized protein LOC106574600 [Salmo salar]	307.375	AAB65430.1	beta actin [Salmo salar]
Hk_0000558	1974	1.4445e-115	AAB65430.1	beta actin [Salmo salar]	100	AAB65430.1	beta actin [Salmo salar]	100	AAB65430.1	beta actin [Salmo salar]	218	XP_014012833.1	PREDICTED: putative proline-rich protein 21 [Salmo salar]	307.375	AAB65430.1	beta actin [Salmo salar]
Hk_0000559	1976	1.45504e-115	AAB65430.1	beta actin [Salmo salar]	100	AAB65430.1	beta actin [Salmo salar]	100	AAB65430.1	beta actin [Salmo salar]	218	XP_014012833.1	PREDICTED: putative proline-rich protein 21 [Salmo salar]	307.375	AAB65430.1	beta actin [Salmo salar]
Hk_0000560	1976	1.44669e-115	AAB65430.1	beta actin [Salmo salar]	100	AAB65430.1	beta actin [Salmo salar]	100	AAB65430.1	beta actin [Salmo salar]	218	XP_014012833.1	PREDICTED: putative proline-rich protein 21 [Salmo salar]	307.375	AAB65430.1	beta actin [Salmo salar]
Hk_0000561	1976	1.44032e-115	AAB65430.1	beta actin [Salmo salar]	100	AAB65430.1	beta actin [Salmo salar]	100	AAB65430.1	beta actin [Salmo salar]	218	XP_014012833.1	PREDICTED: putative proline-rich protein 21 [Salmo salar]	307.375	AAB65430.1	beta actin [Salmo salar]
Hk_0000562	1976	1.4401e-115	AAB65430.1	beta actin [Salmo salar]	100	AAB65430.1	beta actin [Salmo salar]	100	AAB65430.1	beta actin [Salmo salar]	218	XP_014012833.1	PREDICTED: putative proline-rich protein 21 [Salmo salar]	307.375	AAB65430.1	beta actin [Salmo salar]
Hk_0000563	1976	1.44318e-115	AAB65430.1	beta actin [Salmo salar]	100	AAB65430.1	beta actin [Salmo salar]	100	AAB65430.1	beta actin [Salmo salar]	218	XP_014012833.1	PREDICTED: putative proline-rich protein 21 [Salmo salar]	307.375	AAB65430.1	beta actin [Salmo salar]
Hk_0000564	1976	1.44208e-115	AAB65430.1	beta actin [Salmo salar]	100	AAB65430.1	beta actin [Salmo salar]	100	AAB65430.1	beta actin [Salmo salar]	202	XP_014013262.1	PREDICTED: titin-like isoform X1 [Salmo salar]	307.375	AAB65430.1	beta actin [Salmo salar]
Hk_0000565	1972	1.48251e-115	AAB65430.1	beta actin [Salmo salar]	100	AAB65430.1	beta actin [Salmo salar]	100	AAB65430.1	beta actin [Salmo salar]	202	XP_014013262.1	PREDICTED: titin-like isoform X1 [Salmo salar]	307.375	AAB65430.1	beta actin [Salmo salar]
Hk_0000566	760	1.4434e-115	AAB65430.1	beta actin [Salmo salar]	100	AAB65430.1	beta actin [Salmo salar]	100	AAB65430.1	beta actin [Salmo salar]	186	XP_013980551.1	PREDICTED: actin-related protein 6 [Salmo salar]	307.375	AAB65430.1	beta actin [Salmo salar]
Hk_0000567	760	1.47504e-115	AAB65430.1	beta actin [Salmo salar]	100	AAB65430.1	beta actin [Salmo salar]	100	AAB65430.1	beta actin [Salmo salar]	186	XP_013980551.1	PREDICTED: actin-related protein 6 [Salmo salar]	307.375	AAB65430.1	beta actin [Salmo salar]
Hk_0000631	885	1.41252e-57	XP_014050441.1	PREDICTED: SH3 domain-containing protein 19-like [Salmo salar]	100	XP_014050441.1	PREDICTED: SH3 domain-containing protein 19-like [Salmo salar]	100	XP_014050441.1	PREDICTED: SH3 domain-containing protein 19-like [Salmo salar]	175	AKP40998.1	ORF2 protein [Salmo salar]	207.223	XP_014050441.1	PREDICTED: SH3 domain-containing protein 19-like [Salmo salar]
Hk_0000632	869	1.42042e-57	XP_014050441.1	PREDICTED: SH3 domain-containing protein 19-like [Salmo salar]	100	XP_014050441.1	PREDICTED: SH3 domain-containing protein 19-like [Salmo salar]	100	XP_014050441.1	PREDICTED: SH3 domain-containing protein 19-like [Salmo salar]	175	AKP40998.1	ORF2 protein [Salmo salar]	207.223	XP_014050441.1	PREDICTED: SH3 domain-containing protein 19-like [Salmo salar]
Hk_0000633	885	1.42152e-57	XP_014050441.1	PREDICTED: SH3 domain-containing protein 19-like [Salmo salar]	100	XP_014050441.1	PREDICTED: SH3 domain-containing protein 19-like [Salmo salar]	100	XP_014050441.1	PREDICTED: SH3 domain-containing protein 19-like [Salmo salar]	175	AKP40998.1	ORF2 protein [Salmo salar]	207.223	XP_014050441.1	PREDICTED: SH3 domain-containing protein 19-like [Salmo salar]
Hk_0000634	885	1.4134e-57	XP_014050441.1	PREDICTED: SH3 domain-containing protein 19-like [Salmo salar]	100	XP_014050441.1	PREDICTED: SH3 domain-containing protein 19-like [Salmo salar]	100	XP_014050441.1	PREDICTED: SH3 domain-containing protein 19-like [Salmo salar]	175	AKP40998.1	ORF2 protein [Salmo salar]	207.223	XP_014050441.1	PREDICTED: SH3 domain-containing protein 19-like [Salmo salar]
Hk_0000635	869	1.41471e-57	XP_014050441.1	PREDICTED: SH3 domain-containing protein 19-like [Salmo salar]	100	XP_014050441.1	PREDICTED: SH3 domain-containing protein 19-like [Salmo salar]	100	XP_014050441.1	PREDICTED: SH3 domain-containing protein 19-like [Salmo salar]	175	AKP40998.1	ORF2 protein [Salmo salar]	207.223	XP_014050441.1	PREDICTED: SH3 domain-containing protein 19-like [Salmo salar]
Hk_0000636	724	2.88947e-61	ACN11475.1	Transposable element Tcb1 transposase [Salmo salar]	100	XP_014050466.1	PREDICTED: high mobility group protein B2-like isoform X1 [Salmo salar]	100	XP_014050466.1	PREDICTED: high mobility group protein B2-like isoform X1 [Salmo salar]	166	ABV31711.1	transposase [Salmo salar]	215.698	ACN11475.1	Transposable element Tcb1 transposase [Salmo salar]
Hk_0000637	713	2.8868e-61	ACN11475.1	Transposable element Tcb1 transposase [Salmo salar]	100	XP_014050466.1	PREDICTED: high mobility group protein B2-like isoform X1 [Salmo salar]	100	XP_014050466.1	PREDICTED: high mobility group protein B2-like isoform X1 [Salmo salar]	166	ABV31711.1	transposase [Salmo salar]	215.698	ACN11475.1	Transposable element Tcb1 transposase [Salmo salar]
Hk_0000638	713	2.88192e-61	ACN11475.1	Transposable element Tcb1 transposase [Salmo salar]	100	XP_014050466.1	PREDICTED: high mobility group protein B2-like isoform X1 [Salmo salar]	100	XP_014050466.1	PREDICTED: high mobility group protein B2-like isoform X1 [Salmo salar]	166	ABV31711.1	transposase [Salmo salar]	215.698	ACN11475.1	Transposable element Tcb1 transposase [Salmo salar]
Hk_0000639	713	2.88192e-61	ACN11475.1	Transposable element Tcb1 transposase [Salmo salar]	100	XP_014050466.1	PREDICTED: high mobility group protein B2-like isoform X1 [Salmo salar]	100	XP_014050466.1	PREDICTED: high mobility group protein B2-like isoform X1 [Salmo salar]	166	ABV31711.1	transposase [Salmo salar]	215.698	ACN11475.1	Transposable element Tcb1 transposase [Salmo salar]
Hk_0000640	303	2.14332e-81	XP_014051143.1	PREDICTED: perilipin-2-like isoform X1 [Salmo salar]	100	XP_014051143.1	PREDICTED: perilipin-2-like isoform X1 [Salmo salar]	100	XP_014051143.1	PREDICTED: perilipin-2-like isoform X1 [Salmo salar]	222	ABV31710.1	transposase [Salmo salar]	279.256	XP_014051143.1	PREDICTED: perilipin-2-like isoform X1 [Salmo salar]
Hk_0000641	302	2.14501e-81	XP_014051143.1	PREDICTED: perilipin-2-like isoform X1 [Salmo salar]	100	XP_014051143.1	PREDICTED: perilipin-2-like isoform X1 [Salmo salar]	100	XP_014051143.1	PREDICTED: perilipin-2-like isoform X1 [Salmo salar]	222	ABV31710.1	transposase [Salmo salar]	279.256	XP_014051143.1	PREDICTED: perilipin-2-like isoform X1 [Salmo salar]
Hk_0000642	286	2.1504e-81	XP_014051143.1	PREDICTED: perilipin-2-like isoform X1 [Salmo salar]	100	XP_014051143.1	PREDICTED: perilipin-2-like isoform X1 [Salmo salar]	100	XP_014051143.1	PREDICTED: perilipin-2-like isoform X1 [Salmo salar]	222	ABV31710.1	transposase [Salmo salar]	279.256	XP_014051143.1	PREDICTED: perilipin-2-like isoform X1 [Salmo salar]
Hk_0000643	256	2.14568e-81	XP_014051143.1	PREDICTED: perilipin-2-like isoform X1 [Salmo salar]	100	XP_014051143.1	PREDICTED: perilipin-2-like isoform X1 [Salmo salar]	100	XP_014051143.1	PREDICTED: perilipin-2-like isoform X1 [Salmo salar]	222	ABV31710.1	transposase [Salmo salar]	279.256	XP_014051143.1	PREDICTED: perilipin-2-like isoform X1 [Salmo salar]
Hk_0000644	377	0	XP_014056412.1	PREDICTED: uncharacterized protein LOC106605384, partial [Salmo salar]	100	ACN09953.1	Histone H2A.x [Salmo salar]	100	ACN09953.1	Histone H2A.x [Salmo salar]	471	AKP40998.1	ORF2 protein [Salmo salar]	701.434	XP_014056412.1	PREDICTED: uncharacterized protein LOC106605384, partial [Salmo salar]
Hk_0000645	906	1.53786e-65	ACN11475.1	Transposable element Tcb1 transposase [Salmo salar]	100	ACN09818.1	40S ribosomal protein S14 [Salmo salar]	100	ACN09818.1	40S ribosomal protein S14 [Salmo salar]	271	XP_014057933.1	PREDICTED: involucrin-like [Salmo salar]	228.024	ACN11475.1	Transposable element Tcb1 transposase [Salmo salar]
Hk_0000646	906	1.53857e-65	ACN11475.1	Transposable element Tcb1 transposase [Salmo salar]	100	ACN09818.1	40S ribosomal protein S14 [Salmo salar]	100	ACN09818.1	40S ribosomal protein S14 [Salmo salar]	271	XP_014057933.1	PREDICTED: involucrin-like [Salmo salar]	228.024	ACN11475.1	Transposable element Tcb1 transposase [Salmo salar]
Hk_0000647	203	3.42783e-107	ACN11475.1	Transposable element Tcb1 transposase [Salmo salar]	100	ACN09818.1	40S ribosomal protein S14 [Salmo salar]	100	ACN09818.1	40S ribosomal protein S14 [Salmo salar]	257	ABV31711.1	transposase [Salmo salar]	347.436	ACN11475.1	Transposable element Tcb1 transposase [Salmo salar]
Hk_0000648	230	0	AKP40998.1	ORF2 protein [Salmo salar]	100	ACI67196.1	Transgelin [Salmo salar]	100	XP_013993074.1	PREDICTED: transgelin-2-like isoform X1 [Salmo salar]	317	AKP40998.1	ORF2 protein [Salmo salar]	426.787	AKP40998.1	ORF2 protein [Salmo salar]
Hk_0000649	235	0	AKP40998.1	ORF2 protein [Salmo salar]	100	ACI67196.1	Transgelin [Salmo salar]	100	XP_013993074.1	PREDICTED: transgelin-2-like isoform X1 [Salmo salar]	317	AKP40998.1	ORF2 protein [Salmo salar]	426.787	AKP40998.1	ORF2 protein [Salmo salar]
Hk_0000650	237	0	AKP40998.1	ORF2 protein [Salmo salar]	100	ACI67196.1	Transgelin [Salmo salar]	100	XP_013993074.1	PREDICTED: transgelin-2-like isoform X1 [Salmo salar]	317	AKP40998.1	ORF2 protein [Salmo salar]	426.787	AKP40998.1	ORF2 protein [Salmo salar]
Hk_0000651	240	0	AKP40998.1	ORF2 protein [Salmo salar]	100	ACI67196.1	Transgelin [Salmo salar]	100	XP_013993074.1	PREDICTED: transgelin-2-like isoform X1 [Salmo salar]	317	AKP40998.1	ORF2 protein [Salmo salar]	426.787	AKP40998.1	ORF2 protein [Salmo salar]
Hk_0000652	425	2.66065e-74	ABV31710.1	transposase [Salmo salar]	100	ACN10381.1	Collagenase 3 precursor [Salmo salar]	100	ACN10381.1	Collagenase 3 precursor [Salmo salar]	321	ABV31710.1	transposase [Salmo salar]	255.758	ABV31710.1	transposase [Salmo salar]
Hk_0000653	434	2.66729e-74	ABV31710.1	transposase [Salmo salar]	100	ACN10381.1	Collagenase 3 precursor [Salmo salar]	100	ACN10381.1	Collagenase 3 precursor [Salmo salar]	321	ABV31710.1	transposase [Salmo salar]	255.758	ABV31710.1	transposase [Salmo salar]
Hk_0000654	454	2.66438e-74	ABV31710.1	transposase [Salmo salar]	100	ACN10381.1	Collagenase 3 precursor [Salmo salar]	100	ACN10381.1	Collagenase 3 precursor [Salmo salar]	321	ABV31710.1	transposase [Salmo salar]	255.758	ABV31710.1	transposase [Salmo salar]
Hk_0000655	447	2.65982e-74	ABV31710.1	transposase [Salmo salar]	100	ACN10381.1	Collagenase 3 precursor [Salmo salar]	100	ACN10381.1	Collagenase 3 precursor [Salmo salar]	321	ABV31710.1	transposase [Salmo salar]	255.758	ABV31710.1	transposase [Salmo salar]
Hk_0000656	459	2.66397e-74	ABV31710.1	transposase [Salmo salar]	100	ACN10381.1	Collagenase 3 precursor [Salmo salar]	100	ACN10381.1	Collagenase 3 precursor [Salmo salar]	321	ABV31710.1	transposase [Salmo salar]	255.758	ABV31710.1	transposase [Salmo salar]
Hk_0000657	459	2.65899e-74	ABV31710.1	transposase [Salmo salar]	100	ACN10381.1	Collagenase 3 precursor [Salmo salar]	100	ACN10381.1	Collagenase 3 precursor [Salmo salar]	321	ABV31710.1	transposase [Salmo salar]	255.758	ABV31710.1	transposase [Salmo salar]
Hk_0000658	459	2.66106e-74	ABV31710.1	transposase [Salmo salar]	100	ACN10381.1	Collagenase 3 precursor [Salmo salar]	100	ACN10381.1	Collagenase 3 precursor [Salmo salar]	321	ABV31710.1	transposase [Salmo salar]	255.758	ABV31710.1	transposase [Salmo salar]
Hk_0000659	639	2.96157e-41	ACI68605.1	Barrier-to-autointegration factor B [Salmo salar]	100	ACI68605.1	Barrier-to-autointegration factor B [Salmo salar]	100	ACI68605.1	Barrier-to-autointegration factor B [Salmo salar]	307	XP_014041582.1	PREDICTED: uncharacterized protein LOC106594714, partial [Salmo salar]	150.214	ACI68605.1	Barrier-to-autointegration factor B [Salmo salar]
Hk_0000660	664	2.96734e-41	ACI68605.1	Barrier-to-autointegration factor B [Salmo salar]	100	ACI68605.1	Barrier-to-autointegration factor B [Salmo salar]	100	ACI68605.1	Barrier-to-autointegration factor B [Salmo salar]	307	XP_014041582.1	PREDICTED: uncharacterized protein LOC106594714, partial [Salmo salar]	150.214	ACI68605.1	Barrier-to-autointegration factor B [Salmo salar]
Hk_0000661	885	1.41296e-57	XP_014050441.1	PREDICTED: SH3 domain-containing protein 19-like [Salmo salar]	100	XP_014050441.1	PREDICTED: SH3 domain-containing protein 19-like [Salmo salar]	100	XP_014050441.1	PREDICTED: SH3 domain-containing protein 19-like [Salmo salar]	175	AKP40998.1	ORF2 protein [Salmo salar]	207.223	XP_014050441.1	PREDICTED: SH3 domain-containing protein 19-like [Salmo salar]
Hk_0000662	869	1.42086e-57	XP_014050441.1	PREDICTED: SH3 domain-containing protein 19-like [Salmo salar]	100	XP_014050441.1	PREDICTED: SH3 domain-containing protein 19-like [Salmo salar]	100	XP_014050441.1	PREDICTED: SH3 domain-containing protein 19-like [Salmo salar]	175	AKP40998.1	ORF2 protein [Salmo salar]	207.223	XP_014050441.1	PREDICTED: SH3 domain-containing protein 19-like [Salmo salar]
Hk_0000663	869	1.42196e-57	XP_014050441.1	PREDICTED: SH3 domain-containing protein 19-like [Salmo salar]	100	XP_014050441.1	PREDICTED: SH3 domain-containing protein 19-like [Salmo salar]	100	XP_014050441.1	PREDICTED: SH3 domain-containing protein 19-like [Salmo salar]	175	AKP40998.1	ORF2 protein [Salmo salar]	207.223	XP_014050441.1	PREDICTED: SH3 domain-containing protein 19-like [Salmo salar]
Hk_0000664	869	1.41384e-57	XP_014050441.1	PREDICTED: SH3 domain-containing protein 19-like [Salmo salar]	100	XP_014050441.1	PREDICTED: SH3 domain-containing protein 19-like [Salmo salar]	100	XP_014050441.1	PREDICTED: SH3 domain-containing protein 19-like [Salmo salar]	175	AKP40998.1	ORF2 protein [Salmo salar]	207.223	XP_014050441.1	PREDICTED: SH3 domain-containing protein 19-like [Salmo salar]
Hk_0000665	869	1.41493e-57	XP_014050441.1	PREDICTED: SH3 domain-containing protein 19-like [Salmo salar]	100	XP_014050441.1	PREDICTED: SH3 domain-containing protein 19-like [Salmo salar]	100	XP_014050441.1	PREDICTED: SH3 domain-containing protein 19-like [Salmo salar]	175	AKP40998.1	ORF2 protein [Salmo salar]	207.223	XP_014050441.1	PREDICTED: SH3 domain-containing protein 19-like [Salmo salar]
Hk_0000666	724	2.89346e-61	ACN11475.1	Transposable element Tcb1 transposase [Salmo salar]	100	XP_014050466.1	PREDICTED: high mobility group protein B2-like isoform X1 [Salmo salar]	100	XP_014050466.1	PREDICTED: high mobility group protein B2-like isoform X1 [Salmo salar]	166	ABV31711.1	transposase [Salmo salar]	215.698	ACN11475.1	Transposable element Tcb1 transposase [Salmo salar]
Hk_0000667	713	2.88858e-61	ACN11475.1	Transposable element Tcb1 transposase [Salmo salar]	100	XP_014050466.1	PREDICTED: high mobility group protein B2-like isoform X1 [Salmo salar]	100	XP_014050466.1	PREDICTED: high mobility group protein B2-like isoform X1 [Salmo salar]	166	ABV31711.1	transposase [Salmo salar]	215.698	ACN11475.1	Transposable element Tcb1 transposase [Salmo salar]
Hk_0000668	713	2.88281e-61	ACN11475.1	Transposable element Tcb1 transposase [Salmo salar]	100	XP_014050466.1	PREDICTED: high mobility group protein B2-like isoform X1 [Salmo salar]	100	XP_014050466.1	PREDICTED: high mobility group protein B2-like isoform X1 [Salmo salar]	166	ABV31711.1	transposase [Salmo salar]	215.698	ACN11475.1	Transposable element Tcb1 transposase [Salmo salar]
Hk_0000669	713	2.88325e-61	ACN11475.1	Transposable element Tcb1 transposase [Salmo salar]	100	XP_014050466.1	PREDICTED: high mobility group protein B2-like isoform X1 [Salmo salar]	100	XP_014050466.1	PREDICTED: high mobility group protein B2-like isoform X1 [Salmo salar]	166	ABV31711.1	transposase [Salmo salar]	215.698	ACN11475.1	Transposable element Tcb1 transposase [Salmo salar]
Hk_0000670	302	2.14366e-81	XP_014051143.1	PREDICTED: perilipin-2-like isoform X1 [Salmo salar]	100	XP_014051143.1	PREDICTED: perilipin-2-like isoform X1 [Salmo salar]	100	XP_014051143.1	PREDICTED: perilipin-2-like isoform X1 [Salmo salar]	222	ABV31710.1	transposase [Salmo salar]	279.256	XP_014051143.1	PREDICTED: perilipin-2-like isoform X1 [Salmo salar]
Hk_0000671	302	2.14568e-81	XP_014051143.1	PREDICTED: perilipin-2-like isoform X1 [Salmo salar]	100	XP_014051143.1	PREDICTED: perilipin-2-like isoform X1 [Salmo salar]	100	XP_014051143.1	PREDICTED: perilipin-2-like isoform X1 [Salmo salar]	222	ABV31710.1	transposase [Salmo salar]	279.256	XP_014051143.1	PREDICTED: perilipin-2-like isoform X1 [Salmo salar]
Hk_0000672	294	2.15209e-81	XP_014051143.1	PREDICTED: perilipin-2-like isoform X1 [Salmo salar]	100	XP_014051143.1	PREDICTED: perilipin-2-like isoform X1 [Salmo salar]	100	XP_014051143.1	PREDICTED: perilipin-2-like isoform X1 [Salmo salar]	222	ABV31710.1	transposase [Salmo salar]	279.256	XP_014051143.1	PREDICTED: perilipin-2-like isoform X1 [Salmo salar]
Hk_0000673	256	2.14636e-81	XP_014051143.1	PREDICTED: perilipin-2-like isoform X1 [Salmo salar]	100	XP_014051143.1	PREDICTED: perilipin-2-like isoform X1 [Salmo salar]	100	XP_014051143.1	PREDICTED: perilipin-2-like isoform X1 [Salmo salar]	222	ABV31710.1	transposase [Salmo salar]	279.256	XP_014051143.1	PREDICTED: perilipin-2-like isoform X1 [Salmo salar]
Hk_0000674	377	0	XP_014056412.1	PREDICTED: uncharacterized protein LOC106605384, partial [Salmo salar]	100	ACN09953.1	Histone H2A.x [Salmo salar]	100	ACN09953.1	Histone H2A.x [Salmo salar]	471	AKP40998.1	ORF2 protein [Salmo salar]	701.434	XP_014056412.1	PREDICTED: uncharacterized protein LOC106605384, partial [Salmo salar]
Hk_0000675	906	1.5381e-65	ACN11475.1	Transposable element Tcb1 transposase [Salmo salar]	100	ACN09818.1	40S ribosomal protein S14 [Salmo salar]	100	ACN09818.1	40S ribosomal protein S14 [Salmo salar]	271	XP_014057933.1	PREDICTED: involucrin-like [Salmo salar]	228.024	ACN11475.1	Transposable element Tcb1 transposase [Salmo salar]
Hk_0000676	906	1.53881e-65	ACN11475.1	Transposable element Tcb1 transposase [Salmo salar]	100	ACN09818.1	40S ribosomal protein S14 [Salmo salar]	100	ACN09818.1	40S ribosomal protein S14 [Salmo salar]	271	XP_014057933.1	PREDICTED: involucrin-like [Salmo salar]	228.024	ACN11475.1	Transposable element Tcb1 transposase [Salmo salar]
Hk_0000677	203	3.42835e-107	ACN11475.1	Transposable element Tcb1 transposase [Salmo salar]	100	ACN09818.1	40S ribosomal protein S14 [Salmo salar]	100	ACN09818.1	40S ribosomal protein S14 [Salmo salar]	257	ABV31711.1	transposase [Salmo salar]	347.436	ACN11475.1	Transposable element Tcb1 transposase [Salmo salar]
Hk_0000678	230	0	AKP40998.1	ORF2 protein [Salmo salar]	100	ACI67196.1	Transgelin [Salmo salar]	100	XP_013993074.1	PREDICTED: transgelin-2-like isoform X1 [Salmo salar]	317	AKP40998.1	ORF2 protein [Salmo salar]	426.787	AKP40998.1	ORF2 protein [Salmo salar]
Hk_0000679	234	0	AKP40998.1	ORF2 protein [Salmo salar]	100	ACI67196.1	Transgelin [Salmo salar]	100	XP_013993074.1	PREDICTED: transgelin-2-like isoform X1 [Salmo salar]	317	AKP40998.1	ORF2 protein [Salmo salar]	426.787	AKP40998.1	ORF2 protein [Salmo salar]
Hk_0000680	240	0	AKP40998.1	ORF2 protein [Salmo salar]	100	ACI67196.1	Transgelin [Salmo salar]	100	XP_013993074.1	PREDICTED: transgelin-2-like isoform X1 [Salmo salar]	317	AKP40998.1	ORF2 protein [Salmo salar]	426.787	AKP40998.1	ORF2 protein [Salmo salar]
Hk_0000681	427	2.67933e-74	ABV31710.1	transposase [Salmo salar]	100	ACN10381.1	Collagenase 3 precursor [Salmo salar]	100	ACN10381.1	Collagenase 3 precursor [Salmo salar]	321	ABV31710.1	transposase [Salmo salar]	255.758	ABV31710.1	transposase [Salmo salar]
Hk_0000682	425	2.67144e-74	ABV31710.1	transposase [Salmo salar]	100	ACN10381.1	Collagenase 3 precursor [Salmo salar]	100	ACN10381.1	Collagenase 3 precursor [Salmo salar]	321	ABV31710.1	transposase [Salmo salar]	255.758	ABV31710.1	transposase [Salmo salar]
Hk_0000683	443	2.68057e-74	ABV31710.1	transposase [Salmo salar]	100	ACN10381.1	Collagenase 3 precursor [Salmo salar]	100	ACN10381.1	Collagenase 3 precursor [Salmo salar]	321	ABV31710.1	transposase [Salmo salar]	255.758	ABV31710.1	transposase [Salmo salar]
Hk_0000684	454	2.67559e-74	ABV31710.1	transposase [Salmo salar]	100	ACN10381.1	Collagenase 3 precursor [Salmo salar]	100	ACN10381.1	Collagenase 3 precursor [Salmo salar]	321	ABV31710.1	transposase [Salmo salar]	255.758	ABV31710.1	transposase [Salmo salar]
Hk_0000685	450	2.67642e-74	ABV31710.1	transposase [Salmo salar]	100	ACN10381.1	Collagenase 3 precursor [Salmo salar]	100	ACN10381.1	Collagenase 3 precursor [Salmo salar]	321	ABV31710.1	transposase [Salmo salar]	255.758	ABV31710.1	transposase [Salmo salar]
Hk_0000686	459	2.68016e-74	ABV31710.1	transposase [Salmo salar]	100	ACN10381.1	Collagenase 3 precursor [Salmo salar]	100	ACN10381.1	Collagenase 3 precursor [Salmo salar]	321	ABV31710.1	transposase [Salmo salar]	255.758	ABV31710.1	transposase [Salmo salar]
Hk_0000687	446	2.66812e-74	ABV31710.1	transposase [Salmo salar]	100	ACN10381.1	Collagenase 3 precursor [Salmo salar]	100	ACN10381.1	Collagenase 3 precursor [Salmo salar]	321	ABV31710.1	transposase [Salmo salar]	255.758	ABV31710.1	transposase [Salmo salar]
Hk_0000688	425	2.67393e-74	ABV31710.1	transposase [Salmo salar]	100	ACN10381.1	Collagenase 3 precursor [Salmo salar]	100	ACN10381.1	Collagenase 3 precursor [Salmo salar]	321	ABV31710.1	transposase [Salmo salar]	255.758	ABV31710.1	transposase [Salmo salar]
Hk_0000689	415	2.68638e-74	ABV31710.1	transposase [Salmo salar]	100	ACN10381.1	Collagenase 3 precursor [Salmo salar]	100	ACN10381.1	Collagenase 3 precursor [Salmo salar]	321	ABV31710.1	transposase [Salmo salar]	255.758	ABV31710.1	transposase [Salmo salar]
Hk_0000690	410	2.66397e-74	ABV31710.1	transposase [Salmo salar]	100	ACN10381.1	Collagenase 3 precursor [Salmo salar]	100	ACN10381.1	Collagenase 3 precursor [Salmo salar]	321	ABV31710.1	transposase [Salmo salar]	255.758	ABV31710.1	transposase [Salmo salar]
Hk_0000691	647	2.96912e-41	ACI68605.1	Barrier-to-autointegration factor B [Salmo salar]	100	ACI68605.1	Barrier-to-autointegration factor B [Salmo salar]	100	ACI68605.1	Barrier-to-autointegration factor B [Salmo salar]	307	XP_014041582.1	PREDICTED: uncharacterized protein LOC106594714, partial [Salmo salar]	150.214	ACI68605.1	Barrier-to-autointegration factor B [Salmo salar]
Hk_0000692	670	2.97845e-41	ACI68605.1	Barrier-to-autointegration factor B [Salmo salar]	100	ACI68605.1	Barrier-to-autointegration factor B [Salmo salar]	100	ACI68605.1	Barrier-to-autointegration factor B [Salmo salar]	307	XP_014041582.1	PREDICTED: uncharacterized protein LOC106594714, partial [Salmo salar]	150.214	ACI68605.1	Barrier-to-autointegration factor B [Salmo salar]
Hk_0000900	401	9.54065e-105	ACI69264.1	Mannose-binding protein C precursor [Salmo salar]	100	ACN10214.1	Mannose-binding protein C precursor [Salmo salar]	100	ACI69264.1	Mannose-binding protein C precursor [Salmo salar]	285	XP_013996787.1	PREDICTED: uncharacterized protein LOC106569736 isoform X2 [Salmo salar]	335.495	ACI69264.1	Mannose-binding protein C precursor [Salmo salar]
Hk_0000901	407	9.39521e-105	ACI69264.1	Mannose-binding protein C precursor [Salmo salar]	100	ACN10214.1	Mannose-binding protein C precursor [Salmo salar]	100	ACI69264.1	Mannose-binding protein C precursor [Salmo salar]	285	XP_013996787.1	PREDICTED: uncharacterized protein LOC106569736 isoform X2 [Salmo salar]	335.495	ACI69264.1	Mannose-binding protein C precursor [Salmo salar]
Hk_0000902	239	4.02559e-91	XP_014058442.1	PREDICTED: 40S ribosomal protein S2-like, partial [Salmo salar]	100	XP_014058442.1	PREDICTED: 40S ribosomal protein S2-like, partial [Salmo salar]	100	XP_014058442.1	PREDICTED: 40S ribosomal protein S2-like, partial [Salmo salar]	335	ABV31710.1	transposase [Salmo salar]	300.442	ACN09907.1	40S ribosomal protein S2 [Salmo salar]
Hk_0000903	265	2.31937e-91	ACN09907.1	40S ribosomal protein S2 [Salmo salar]	100	ACN09907.1	40S ribosomal protein S2 [Salmo salar]	100	ACN09907.1	40S ribosomal protein S2 [Salmo salar]	335	ABV31710.1	transposase [Salmo salar]	302.368	ACN09907.1	40S ribosomal protein S2 [Salmo salar]
Hk_0000904	659	0	XP_014058600.1	PREDICTED: uncharacterized protein LOC106606767 [Salmo salar]	100	XP_014058600.1	PREDICTED: uncharacterized protein LOC106606767 [Salmo salar]	100	XP_014058600.1	PREDICTED: uncharacterized protein LOC106606767 [Salmo salar]	428	XP_014058600.1	PREDICTED: uncharacterized protein LOC106606767 [Salmo salar]	770.77	XP_014058600.1	PREDICTED: uncharacterized protein LOC106606767 [Salmo salar]
Hk_0000905	659	0	XP_014058600.1	PREDICTED: uncharacterized protein LOC106606767 [Salmo salar]	100	XP_014058600.1	PREDICTED: uncharacterized protein LOC106606767 [Salmo salar]	100	XP_014058600.1	PREDICTED: uncharacterized protein LOC106606767 [Salmo salar]	428	XP_014058600.1	PREDICTED: uncharacterized protein LOC106606767 [Salmo salar]	770.77	XP_014058600.1	PREDICTED: uncharacterized protein LOC106606767 [Salmo salar]
Hk_0000906	659	0	XP_014058600.1	PREDICTED: uncharacterized protein LOC106606767 [Salmo salar]	100	XP_014058600.1	PREDICTED: uncharacterized protein LOC106606767 [Salmo salar]	100	XP_014058600.1	PREDICTED: uncharacterized protein LOC106606767 [Salmo salar]	428	XP_014058600.1	PREDICTED: uncharacterized protein LOC106606767 [Salmo salar]	770.77	XP_014058600.1	PREDICTED: uncharacterized protein LOC106606767 [Salmo salar]
Hk_0000907	659	0	XP_014058600.1	PREDICTED: uncharacterized protein LOC106606767 [Salmo salar]	100	XP_014058600.1	PREDICTED: uncharacterized protein LOC106606767 [Salmo salar]	100	XP_014058600.1	PREDICTED: uncharacterized protein LOC106606767 [Salmo salar]	428	XP_014058600.1	PREDICTED: uncharacterized protein LOC106606767 [Salmo salar]	770.77	XP_014058600.1	PREDICTED: uncharacterized protein LOC106606767 [Salmo salar]
Hk_0000908	659	0	XP_014058600.1	PREDICTED: uncharacterized protein LOC106606767 [Salmo salar]	100	XP_014058600.1	PREDICTED: uncharacterized protein LOC106606767 [Salmo salar]	100	XP_014058600.1	PREDICTED: uncharacterized protein LOC106606767 [Salmo salar]	428	XP_014058600.1	PREDICTED: uncharacterized protein LOC106606767 [Salmo salar]	770.77	XP_014058600.1	PREDICTED: uncharacterized protein LOC106606767 [Salmo salar]
Hk_0000909	660	0	XP_014058600.1	PREDICTED: uncharacterized protein LOC106606767 [Salmo salar]	100	XP_014058600.1	PREDICTED: uncharacterized protein LOC106606767 [Salmo salar]	100	XP_014058600.1	PREDICTED: uncharacterized protein LOC106606767 [Salmo salar]	428	XP_014058600.1	PREDICTED: uncharacterized protein LOC106606767 [Salmo salar]	770.77	XP_014058600.1	PREDICTED: uncharacterized protein LOC106606767 [Salmo salar]
Hk_0000910	669	0	XP_014058600.1	PREDICTED: uncharacterized protein LOC106606767 [Salmo salar]	100	XP_014058600.1	PREDICTED: uncharacterized protein LOC106606767 [Salmo salar]	100	XP_014058600.1	PREDICTED: uncharacterized protein LOC106606767 [Salmo salar]	428	XP_014058600.1	PREDICTED: uncharacterized protein LOC106606767 [Salmo salar]	770.77	XP_014058600.1	PREDICTED: uncharacterized protein LOC106606767 [Salmo salar]
Hk_0000911	675	0	XP_014058600.1	PREDICTED: uncharacterized protein LOC106606767 [Salmo salar]	100	XP_014058600.1	PREDICTED: uncharacterized protein LOC106606767 [Salmo salar]	100	XP_014058600.1	PREDICTED: uncharacterized protein LOC106606767 [Salmo salar]	428	XP_014058600.1	PREDICTED: uncharacterized protein LOC106606767 [Salmo salar]	770.77	XP_014058600.1	PREDICTED: uncharacterized protein LOC106606767 [Salmo salar]
Hk_0000912	675	0	XP_014058600.1	PREDICTED: uncharacterized protein LOC106606767 [Salmo salar]	100	XP_014058600.1	PREDICTED: uncharacterized protein LOC106606767 [Salmo salar]	100	XP_014058600.1	PREDICTED: uncharacterized protein LOC106606767 [Salmo salar]	428	XP_014058600.1	PREDICTED: uncharacterized protein LOC106606767 [Salmo salar]	770.77	XP_014058600.1	PREDICTED: uncharacterized protein LOC106606767 [Salmo salar]
Hk_0000913	675	0	XP_014058600.1	PREDICTED: uncharacterized protein LOC106606767 [Salmo salar]	100	XP_014058600.1	PREDICTED: uncharacterized protein LOC106606767 [Salmo salar]	100	XP_014058600.1	PREDICTED: uncharacterized protein LOC106606767 [Salmo salar]	428	XP_014058600.1	PREDICTED: uncharacterized protein LOC106606767 [Salmo salar]	770.77	XP_014058600.1	PREDICTED: uncharacterized protein LOC106606767 [Salmo salar]
Hk_0000914	675	0	XP_014058600.1	PREDICTED: uncharacterized protein LOC106606767 [Salmo salar]	100	XP_014058600.1	PREDICTED: uncharacterized protein LOC106606767 [Salmo salar]	100	XP_014058600.1	PREDICTED: uncharacterized protein LOC106606767 [Salmo salar]	428	XP_014058600.1	PREDICTED: uncharacterized protein LOC106606767 [Salmo salar]	770.77	XP_014058600.1	PREDICTED: uncharacterized protein LOC106606767 [Salmo salar]
Hk_0000915	675	0	XP_014058600.1	PREDICTED: uncharacterized protein LOC106606767 [Salmo salar]	100	XP_014058600.1	PREDICTED: uncharacterized protein LOC106606767 [Salmo salar]	100	XP_014058600.1	PREDICTED: uncharacterized protein LOC106606767 [Salmo salar]	428	XP_014058600.1	PREDICTED: uncharacterized protein LOC106606767 [Salmo salar]	770.77	XP_014058600.1	PREDICTED: uncharacterized protein LOC106606767 [Salmo salar]
Hk_0000916	675	0	XP_014058600.1	PREDICTED: uncharacterized protein LOC106606767 [Salmo salar]	100	XP_014058600.1	PREDICTED: uncharacterized protein LOC106606767 [Salmo salar]	100	XP_014058600.1	PREDICTED: uncharacterized protein LOC106606767 [Salmo salar]	428	XP_014058600.1	PREDICTED: uncharacterized protein LOC106606767 [Salmo salar]	770.77	XP_014058600.1	PREDICTED: uncharacterized protein LOC106606767 [Salmo salar]
Hk_0000917	676	0	XP_014058600.1	PREDICTED: uncharacterized protein LOC106606767 [Salmo salar]	100	XP_014058600.1	PREDICTED: uncharacterized protein LOC106606767 [Salmo salar]	100	XP_014058600.1	PREDICTED: uncharacterized protein LOC106606767 [Salmo salar]	428	XP_014058600.1	PREDICTED: uncharacterized protein LOC106606767 [Salmo salar]	770.77	XP_014058600.1	PREDICTED: uncharacterized protein LOC106606767 [Salmo salar]
Hk_0000918	676	0	XP_014058600.1	PREDICTED: uncharacterized protein LOC106606767 [Salmo salar]	100	XP_014058600.1	PREDICTED: uncharacterized protein LOC106606767 [Salmo salar]	100	XP_014058600.1	PREDICTED: uncharacterized protein LOC106606767 [Salmo salar]	428	XP_014058600.1	PREDICTED: uncharacterized protein LOC106606767 [Salmo salar]	770.77	XP_014058600.1	PREDICTED: uncharacterized protein LOC106606767 [Salmo salar]
Hk_0000919	676	0	XP_014058600.1	PREDICTED: uncharacterized protein LOC106606767 [Salmo salar]	100	XP_014058600.1	PREDICTED: uncharacterized protein LOC106606767 [Salmo salar]	100	XP_014058600.1	PREDICTED: uncharacterized protein LOC106606767 [Salmo salar]	428	XP_014058600.1	PREDICTED: uncharacterized protein LOC106606767 [Salmo salar]	770.77	XP_014058600.1	PREDICTED: uncharacterized protein LOC106606767 [Salmo salar]
Hk_0000920	676	0	XP_014058600.1	PREDICTED: uncharacterized protein LOC106606767 [Salmo salar]	100	XP_014058600.1	PREDICTED: uncharacterized protein LOC106606767 [Salmo salar]	100	XP_014058600.1	PREDICTED: uncharacterized protein LOC106606767 [Salmo salar]	428	XP_014058600.1	PREDICTED: uncharacterized protein LOC106606767 [Salmo salar]	770.77	XP_014058600.1	PREDICTED: uncharacterized protein LOC106606767 [Salmo salar]
Hk_0000921	550	4.27384e-142	AKP40998.1	ORF2 protein [Salmo salar]	100	XP_014058779.1	PREDICTED: claudin-4-like [Salmo salar]	100	XP_014058779.1	PREDICTED: claudin-4-like [Salmo salar]	334	AKP40998.1	ORF2 protein [Salmo salar]	479.945	AKP40998.1	ORF2 protein [Salmo salar]
Hk_0000922	227	0	ACI33546.1	RUN domain-containing protein 1 [Salmo salar]	100	XP_014058874.1	PREDICTED: RUN domain-containing protein 1-like [Salmo salar]	100	ACI33546.1	RUN domain-containing protein 1 [Salmo salar]	450	AKP40998.1	ORF2 protein [Salmo salar]	598.586	ACI33546.1	RUN domain-containing protein 1 [Salmo salar]
Hk_0000923	227	0	ACI33546.1	RUN domain-containing protein 1 [Salmo salar]	100	XP_014058874.1	PREDICTED: RUN domain-containing protein 1-like [Salmo salar]	100	ACI33546.1	RUN domain-containing protein 1 [Salmo salar]	450	AKP40998.1	ORF2 protein [Salmo salar]	598.586	ACI33546.1	RUN domain-containing protein 1 [Salmo salar]
Hk_0000924	220	0	ACI33546.1	RUN domain-containing protein 1 [Salmo salar]	100	XP_014058874.1	PREDICTED: RUN domain-containing protein 1-like [Salmo salar]	100	ACI33546.1	RUN domain-containing protein 1 [Salmo salar]	450	AKP40998.1	ORF2 protein [Salmo salar]	598.586	ACI33546.1	RUN domain-containing protein 1 [Salmo salar]
Hk_0000925	421	1.40106e-135	ABV31711.1	transposase [Salmo salar]	100	ACH85333.1	ribosomal protein L3-like [Salmo salar]	100	ACH85333.1	ribosomal protein L3-like [Salmo salar]	169	XP_014004621.1	PREDICTED: uncharacterized protein LOC106573797, partial [Salmo salar]	327.791	ABV31711.1	transposase [Salmo salar]
Hk_0000926	421	1.40128e-135	ABV31711.1	transposase [Salmo salar]	100	ACH85333.1	ribosomal protein L3-like [Salmo salar]	100	ACH85333.1	ribosomal protein L3-like [Salmo salar]	166	ABV31711.1	transposase [Salmo salar]	327.791	ABV31711.1	transposase [Salmo salar]
Hk_0000927	409	1.39829e-135	ABV31711.1	transposase [Salmo salar]	100	ACH85333.1	ribosomal protein L3-like [Salmo salar]	100	ACH85333.1	ribosomal protein L3-like [Salmo salar]	166	ABV31711.1	transposase [Salmo salar]	327.791	ABV31711.1	transposase [Salmo salar]
Hk_0000928	407	1.39936e-135	ABV31711.1	transposase [Salmo salar]	100	ACH85333.1	ribosomal protein L3-like [Salmo salar]	100	ACH85333.1	ribosomal protein L3-like [Salmo salar]	166	ABV31711.1	transposase [Salmo salar]	327.791	ABV31711.1	transposase [Salmo salar]
Hk_0000929	379	1.40042e-135	ABV31711.1	transposase [Salmo salar]	100	ACH85333.1	ribosomal protein L3-like [Salmo salar]	100	ACH85333.1	ribosomal protein L3-like [Salmo salar]	166	ABV31711.1	transposase [Salmo salar]	327.791	ABV31711.1	transposase [Salmo salar]
Hk_0000930	379	1.39893e-135	ABV31711.1	transposase [Salmo salar]	100	ACH85333.1	ribosomal protein L3-like [Salmo salar]	100	ACH85333.1	ribosomal protein L3-like [Salmo salar]	166	ABV31711.1	transposase [Salmo salar]	327.791	ABV31711.1	transposase [Salmo salar]
Hk_0000931	379	1.40811e-135	ABV31711.1	transposase [Salmo salar]	100	ACH85333.1	ribosomal protein L3-like [Salmo salar]	100	ACH85333.1	ribosomal protein L3-like [Salmo salar]	166	ABV31711.1	transposase [Salmo salar]	327.791	ABV31711.1	transposase [Salmo salar]
Hk_0000932	378	1.42006e-135	ABV31711.1	transposase [Salmo salar]	100	ACH85333.1	ribosomal protein L3-like [Salmo salar]	100	ACH85333.1	ribosomal protein L3-like [Salmo salar]	166	ABV31711.1	transposase [Salmo salar]	327.791	ABV31711.1	transposase [Salmo salar]
Hk_0000933	378	1.40426e-135	ABV31711.1	transposase [Salmo salar]	100	ACH85333.1	ribosomal protein L3-like [Salmo salar]	100	ACH85333.1	ribosomal protein L3-like [Salmo salar]	166	ABV31711.1	transposase [Salmo salar]	327.791	ABV31711.1	transposase [Salmo salar]
Hk_0000934	282	1.74584e-66	XP_014059350.1	PREDICTED: von Willebrand factor C domain-containing protein 2-like [Salmo salar]	100	XP_014059350.1	PREDICTED: von Willebrand factor C domain-containing protein 2-like [Salmo salar]	100	XP_014059350.1	PREDICTED: von Willebrand factor C domain-containing protein 2-like [Salmo salar]	229	ABV31711.1	transposase [Salmo salar]	229.18	XP_014059350.1	PREDICTED: von Willebrand factor C domain-containing protein 2-like [Salmo salar]
Hk_0000935	282	1.74665e-66	XP_014059350.1	PREDICTED: von Willebrand factor C domain-containing protein 2-like [Salmo salar]	100	XP_014059350.1	PREDICTED: von Willebrand factor C domain-containing protein 2-like [Salmo salar]	100	XP_014059350.1	PREDICTED: von Willebrand factor C domain-containing protein 2-like [Salmo salar]	229	ABV31711.1	transposase [Salmo salar]	229.18	XP_014059350.1	PREDICTED: von Willebrand factor C domain-containing protein 2-like [Salmo salar]
Hk_0000936	262	1.74264e-66	XP_014059350.1	PREDICTED: von Willebrand factor C domain-containing protein 2-like [Salmo salar]	100	XP_014059350.1	PREDICTED: von Willebrand factor C domain-containing protein 2-like [Salmo salar]	100	XP_014059350.1	PREDICTED: von Willebrand factor C domain-containing protein 2-like [Salmo salar]	229	ABV31711.1	transposase [Salmo salar]	229.18	XP_014059350.1	PREDICTED: von Willebrand factor C domain-containing protein 2-like [Salmo salar]
Hk_0000937	1068	5.34353e-77	XP_014062995.1	PREDICTED: DNA-directed RNA polymerase II subunit RPB1-like [Salmo salar]	100	ACN10044.1	Hemoglobin subunit alpha [Salmo salar]	100	ACN10044.1	Hemoglobin subunit alpha [Salmo salar]	271	XP_014062995.1	PREDICTED: DNA-directed RNA polymerase II subunit RPB1-like [Salmo salar]	264.233	XP_014062995.1	PREDICTED: DNA-directed RNA polymerase II subunit RPB1-like [Salmo salar]
Hk_0000938	1073	4.93642e-75	XP_014062995.1	PREDICTED: DNA-directed RNA polymerase II subunit RPB1-like [Salmo salar]	100	ACN10044.1	Hemoglobin subunit alpha [Salmo salar]	100	ACN10044.1	Hemoglobin subunit alpha [Salmo salar]	258	XP_014062995.1	PREDICTED: DNA-directed RNA polymerase II subunit RPB1-like [Salmo salar]	258.455	XP_014062995.1	PREDICTED: DNA-directed RNA polymerase II subunit RPB1-like [Salmo salar]
Hk_0000939	1089	3.06495e-66	ACN10024.1	Hemoglobin subunit beta [Salmo salar]	100	ACN10044.1	Hemoglobin subunit alpha [Salmo salar]	100	ACN10044.1	Hemoglobin subunit alpha [Salmo salar]	253	ABV31710.1	transposase [Salmo salar]	224.557	ACN10024.1	Hemoglobin subunit beta [Salmo salar]
Hk_0000940	1117	3.06541e-66	ACN10024.1	Hemoglobin subunit beta [Salmo salar]	100	ACN10044.1	Hemoglobin subunit alpha [Salmo salar]	100	ACN10044.1	Hemoglobin subunit alpha [Salmo salar]	253	ABV31710.1	transposase [Salmo salar]	224.557	ACN10024.1	Hemoglobin subunit beta [Salmo salar]
Hk_0000941	1105	3.06681e-66	ACN10024.1	Hemoglobin subunit beta [Salmo salar]	100	ACN10044.1	Hemoglobin subunit alpha [Salmo salar]	100	ACN10044.1	Hemoglobin subunit alpha [Salmo salar]	253	ABV31710.1	transposase [Salmo salar]	224.557	ACN10024.1	Hemoglobin subunit beta [Salmo salar]
Hk_0000942	1105	3.06774e-66	ACN10024.1	Hemoglobin subunit beta [Salmo salar]	100	ACN10044.1	Hemoglobin subunit alpha [Salmo salar]	100	ACN10044.1	Hemoglobin subunit alpha [Salmo salar]	253	ABV31710.1	transposase [Salmo salar]	224.557	ACN10024.1	Hemoglobin subunit beta [Salmo salar]
Hk_0000943	1096	3.06541e-66	ACN10024.1	Hemoglobin subunit beta [Salmo salar]	100	ACN10044.1	Hemoglobin subunit alpha [Salmo salar]	100	ACN10044.1	Hemoglobin subunit alpha [Salmo salar]	253	ABV31710.1	transposase [Salmo salar]	224.557	ACN10024.1	Hemoglobin subunit beta [Salmo salar]
Hk_0000944	1096	3.06541e-66	ACN10024.1	Hemoglobin subunit beta [Salmo salar]	100	ACN10044.1	Hemoglobin subunit alpha [Salmo salar]	100	ACN10044.1	Hemoglobin subunit alpha [Salmo salar]	253	ABV31710.1	transposase [Salmo salar]	224.557	ACN10024.1	Hemoglobin subunit beta [Salmo salar]
Hk_0000945	1096	3.06495e-66	ACN10024.1	Hemoglobin subunit beta [Salmo salar]	100	ACN10044.1	Hemoglobin subunit alpha [Salmo salar]	100	ACN10044.1	Hemoglobin subunit alpha [Salmo salar]	253	ABV31710.1	transposase [Salmo salar]	224.557	ACN10024.1	Hemoglobin subunit beta [Salmo salar]
Hk_0000946	1098	3.06541e-66	ACN10024.1	Hemoglobin subunit beta [Salmo salar]	100	ACN10044.1	Hemoglobin subunit alpha [Salmo salar]	100	ACN10044.1	Hemoglobin subunit alpha [Salmo salar]	253	ABV31710.1	transposase [Salmo salar]	224.557	ACN10024.1	Hemoglobin subunit beta [Salmo salar]
Hk_0000947	1098	3.06495e-66	ACN10024.1	Hemoglobin subunit beta [Salmo salar]	100	ACN10044.1	Hemoglobin subunit alpha [Salmo salar]	100	ACN10044.1	Hemoglobin subunit alpha [Salmo salar]	253	ABV31710.1	transposase [Salmo salar]	224.557	ACN10024.1	Hemoglobin subunit beta [Salmo salar]
Hk_0000948	1098	3.07611e-66	ACN10024.1	Hemoglobin subunit beta [Salmo salar]	100	ACN10044.1	Hemoglobin subunit alpha [Salmo salar]	100	ACN10044.1	Hemoglobin subunit alpha [Salmo salar]	253	ABV31710.1	transposase [Salmo salar]	224.557	ACN10024.1	Hemoglobin subunit beta [Salmo salar]
Hk_0000949	998	3.07518e-66	ACN10024.1	Hemoglobin subunit beta [Salmo salar]	100	ACN10044.1	Hemoglobin subunit alpha [Salmo salar]	100	ACN10044.1	Hemoglobin subunit alpha [Salmo salar]	253	ABV31710.1	transposase [Salmo salar]	224.557	ACN10024.1	Hemoglobin subunit beta [Salmo salar]
Hk_0000950	998	3.06634e-66	ACN10024.1	Hemoglobin subunit beta [Salmo salar]	100	ACN10044.1	Hemoglobin subunit alpha [Salmo salar]	100	ACN10044.1	Hemoglobin subunit alpha [Salmo salar]	253	ABV31710.1	transposase [Salmo salar]	224.557	ACN10024.1	Hemoglobin subunit beta [Salmo salar]
Hk_0000951	1000	3.07285e-66	ACN10024.1	Hemoglobin subunit beta [Salmo salar]	100	ACN10044.1	Hemoglobin subunit alpha [Salmo salar]	100	ACN10044.1	Hemoglobin subunit alpha [Salmo salar]	253	ABV31710.1	transposase [Salmo salar]	224.557	ACN10024.1	Hemoglobin subunit beta [Salmo salar]
Hk_0000952	1000	3.06495e-66	ACN10024.1	Hemoglobin subunit beta [Salmo salar]	100	ACN10044.1	Hemoglobin subunit alpha [Salmo salar]	100	ACN10044.1	Hemoglobin subunit alpha [Salmo salar]	253	ABV31710.1	transposase [Salmo salar]	224.557	ACN10024.1	Hemoglobin subunit beta [Salmo salar]
Hk_0000953	1001	3.06495e-66	ACN10024.1	Hemoglobin subunit beta [Salmo salar]	100	ACN10044.1	Hemoglobin subunit alpha [Salmo salar]	100	ACN10044.1	Hemoglobin subunit alpha [Salmo salar]	253	ABV31710.1	transposase [Salmo salar]	224.557	ACN10024.1	Hemoglobin subunit beta [Salmo salar]
Hk_0000954	1002	3.06727e-66	ACN10024.1	Hemoglobin subunit beta [Salmo salar]	100	ACN10044.1	Hemoglobin subunit alpha [Salmo salar]	100	ACN10044.1	Hemoglobin subunit alpha [Salmo salar]	253	ABV31710.1	transposase [Salmo salar]	224.557	ACN10024.1	Hemoglobin subunit beta [Salmo salar]
Hk_0000955	1002	3.06774e-66	ACN10024.1	Hemoglobin subunit beta [Salmo salar]	100	ACN10044.1	Hemoglobin subunit alpha [Salmo salar]	100	ACN10044.1	Hemoglobin subunit alpha [Salmo salar]	253	ABV31710.1	transposase [Salmo salar]	224.557	ACN10024.1	Hemoglobin subunit beta [Salmo salar]
Hk_0000956	1004	3.0682e-66	ACN10024.1	Hemoglobin subunit beta [Salmo salar]	100	ACN10044.1	Hemoglobin subunit alpha [Salmo salar]	100	ACN10044.1	Hemoglobin subunit alpha [Salmo salar]	272	XP_014009224.1	PREDICTED: uncharacterized protein LOC106576526 [Salmo salar]	224.557	ACN10024.1	Hemoglobin subunit beta [Salmo salar]
Hk_0000957	1004	3.06681e-66	ACN10024.1	Hemoglobin subunit beta [Salmo salar]	100	ACN10044.1	Hemoglobin subunit alpha [Salmo salar]	100	ACN10044.1	Hemoglobin subunit alpha [Salmo salar]	272	XP_014009224.1	PREDICTED: uncharacterized protein LOC106576526 [Salmo salar]	224.557	ACN10024.1	Hemoglobin subunit beta [Salmo salar]
Hk_0000958	1004	3.06774e-66	ACN10024.1	Hemoglobin subunit beta [Salmo salar]	100	ACN10044.1	Hemoglobin subunit alpha [Salmo salar]	100	ACN10044.1	Hemoglobin subunit alpha [Salmo salar]	272	XP_014009224.1	PREDICTED: uncharacterized protein LOC106576526 [Salmo salar]	224.557	ACN10024.1	Hemoglobin subunit beta [Salmo salar]
Hk_0000959	1004	3.07006e-66	ACN10024.1	Hemoglobin subunit beta [Salmo salar]	100	ACN10044.1	Hemoglobin subunit alpha [Salmo salar]	100	ACN10044.1	Hemoglobin subunit alpha [Salmo salar]	272	XP_014009224.1	PREDICTED: uncharacterized protein LOC106576526 [Salmo salar]	224.557	ACN10024.1	Hemoglobin subunit beta [Salmo salar]
Hk_0000960	1004	3.07099e-66	ACN10024.1	Hemoglobin subunit beta [Salmo salar]	100	ACN10044.1	Hemoglobin subunit alpha [Salmo salar]	100	ACN10044.1	Hemoglobin subunit alpha [Salmo salar]	272	XP_014009224.1	PREDICTED: uncharacterized protein LOC106576526 [Salmo salar]	224.557	ACN10024.1	Hemoglobin subunit beta [Salmo salar]
Hk_0000961	1004	3.08262e-66	ACN10024.1	Hemoglobin subunit beta [Salmo salar]	100	ACN10044.1	Hemoglobin subunit alpha [Salmo salar]	100	ACN10044.1	Hemoglobin subunit alpha [Salmo salar]	272	XP_014009224.1	PREDICTED: uncharacterized protein LOC106576526 [Salmo salar]	224.557	ACN10024.1	Hemoglobin subunit beta [Salmo salar]
Hk_0000962	340	4.95962e-75	ABV31710.1	transposase [Salmo salar]	100	ACI66616.1	40S ribosomal protein S11 [Salmo salar]	100	ACI68815.1	40S ribosomal protein S11 [Salmo salar]	177	ABV31711.1	transposase [Salmo salar]	197.208	ABV31710.1	transposase [Salmo salar]
Hk_0000963	344	4.96037e-75	ABV31710.1	transposase [Salmo salar]	100	ACI66616.1	40S ribosomal protein S11 [Salmo salar]	100	ACI68815.1	40S ribosomal protein S11 [Salmo salar]	177	ABV31711.1	transposase [Salmo salar]	197.208	ABV31710.1	transposase [Salmo salar]
Hk_0000964	348	4.9491e-75	ABV31710.1	transposase [Salmo salar]	100	ACI66616.1	40S ribosomal protein S11 [Salmo salar]	100	ACI68815.1	40S ribosomal protein S11 [Salmo salar]	177	ABV31711.1	transposase [Salmo salar]	197.208	ABV31710.1	transposase [Salmo salar]
Hk_0000965	351	4.96262e-75	ABV31710.1	transposase [Salmo salar]	100	ACI66616.1	40S ribosomal protein S11 [Salmo salar]	100	ACI68815.1	40S ribosomal protein S11 [Salmo salar]	177	ABV31711.1	transposase [Salmo salar]	197.208	ABV31710.1	transposase [Salmo salar]
Hk_0000966	196	2.3959e-125	ABV31711.1	transposase [Salmo salar]	100	ACH70808.1	ribosomal protein L19 [Salmo salar]	100	ACH70808.1	ribosomal protein L19 [Salmo salar]	329	ACH85309.1	transposase-like [Salmo salar]	401.364	ABV31711.1	transposase [Salmo salar]
Hk_0000967	196	2.39331e-125	ABV31711.1	transposase [Salmo salar]	100	ACH70808.1	ribosomal protein L19 [Salmo salar]	100	ACH70808.1	ribosomal protein L19 [Salmo salar]	329	ACH85309.1	transposase-like [Salmo salar]	401.364	ABV31711.1	transposase [Salmo salar]
Hk_0000968	182	2.39553e-125	ABV31711.1	transposase [Salmo salar]	100	ACH70808.1	ribosomal protein L19 [Salmo salar]	100	ACH70808.1	ribosomal protein L19 [Salmo salar]	329	ACH85309.1	transposase-like [Salmo salar]	401.364	ABV31711.1	transposase [Salmo salar]
Hk_0000969	182	2.38887e-125	ABV31711.1	transposase [Salmo salar]	100	ACH70808.1	ribosomal protein L19 [Salmo salar]	100	ACH70808.1	ribosomal protein L19 [Salmo salar]	329	ACH85309.1	transposase-like [Salmo salar]	401.364	ABV31711.1	transposase [Salmo salar]
Hk_0000970	300	0	XP_014061288.1	PREDICTED: alpha-1,6-mannosyl-glycoprotein 2-beta-N-acetylglucosaminyltransferase isoform X1 [Salmo salar]	100	XP_014061288.1	PREDICTED: alpha-1,6-mannosyl-glycoprotein 2-beta-N-acetylglucosaminyltransferase isoform X1 [Salmo salar]	100	XP_014061288.1	PREDICTED: alpha-1,6-mannosyl-glycoprotein 2-beta-N-acetylglucosaminyltransferase isoform X1 [Salmo salar]	288	XP_014061288.1	PREDICTED: alpha-1,6-mannosyl-glycoprotein 2-beta-N-acetylglucosaminyltransferase isoform X1 [Salmo salar]	572.007	XP_014061288.1	PREDICTED: alpha-1,6-mannosyl-glycoprotein 2-beta-N-acetylglucosaminyltransferase isoform X1 [Salmo salar]
Hk_0000971	300	0	XP_014061288.1	PREDICTED: alpha-1,6-mannosyl-glycoprotein 2-beta-N-acetylglucosaminyltransferase isoform X1 [Salmo salar]	100	XP_014061288.1	PREDICTED: alpha-1,6-mannosyl-glycoprotein 2-beta-N-acetylglucosaminyltransferase isoform X1 [Salmo salar]	100	XP_014061288.1	PREDICTED: alpha-1,6-mannosyl-glycoprotein 2-beta-N-acetylglucosaminyltransferase isoform X1 [Salmo salar]	386	XP_014061288.1	PREDICTED: alpha-1,6-mannosyl-glycoprotein 2-beta-N-acetylglucosaminyltransferase isoform X1 [Salmo salar]	782.711	XP_014061288.1	PREDICTED: alpha-1,6-mannosyl-glycoprotein 2-beta-N-acetylglucosaminyltransferase isoform X1 [Salmo salar]
Hk_0000972	301	0	XP_014061288.1	PREDICTED: alpha-1,6-mannosyl-glycoprotein 2-beta-N-acetylglucosaminyltransferase isoform X1 [Salmo salar]	100	XP_014061288.1	PREDICTED: alpha-1,6-mannosyl-glycoprotein 2-beta-N-acetylglucosaminyltransferase isoform X1 [Salmo salar]	100	XP_014061288.1	PREDICTED: alpha-1,6-mannosyl-glycoprotein 2-beta-N-acetylglucosaminyltransferase isoform X1 [Salmo salar]	443	XP_014061288.1	PREDICTED: alpha-1,6-mannosyl-glycoprotein 2-beta-N-acetylglucosaminyltransferase isoform X1 [Salmo salar]	901.353	XP_014061288.1	PREDICTED: alpha-1,6-mannosyl-glycoprotein 2-beta-N-acetylglucosaminyltransferase isoform X1 [Salmo salar]
Hk_0000973	905	2.25422e-42	ABV31710.1	transposase [Salmo salar]	100	XP_014061298.1	PREDICTED: ribonuclease H1-like isoform X1 [Salmo salar]	100	XP_014061298.1	PREDICTED: ribonuclease H1-like isoform X1 [Salmo salar]	177	XP_014037959.1	PREDICTED: uncharacterized protein LOC106591269 isoform X1 [Salmo salar]	159.073	ACJ02102.1	SPATA5 [Salmo salar]
Hk_0000974	901	2.2481e-42	ABV31710.1	transposase [Salmo salar]	100	XP_014061298.1	PREDICTED: ribonuclease H1-like isoform X1 [Salmo salar]	100	XP_014061298.1	PREDICTED: ribonuclease H1-like isoform X1 [Salmo salar]	177	XP_014037959.1	PREDICTED: uncharacterized protein LOC106591269 isoform X1 [Salmo salar]	159.073	ACJ02102.1	SPATA5 [Salmo salar]
Hk_0000975	899	2.25694e-42	ABV31710.1	transposase [Salmo salar]	100	XP_014061298.1	PREDICTED: ribonuclease H1-like isoform X1 [Salmo salar]	100	XP_014061298.1	PREDICTED: ribonuclease H1-like isoform X1 [Salmo salar]	177	XP_014037959.1	PREDICTED: uncharacterized protein LOC106591269 isoform X1 [Salmo salar]	159.073	ACJ02102.1	SPATA5 [Salmo salar]
Hk_0000976	897	2.24912e-42	ABV31710.1	transposase [Salmo salar]	100	XP_014061298.1	PREDICTED: ribonuclease H1-like isoform X1 [Salmo salar]	100	XP_014061298.1	PREDICTED: ribonuclease H1-like isoform X1 [Salmo salar]	177	XP_014037959.1	PREDICTED: uncharacterized protein LOC106591269 isoform X1 [Salmo salar]	159.073	ACJ02102.1	SPATA5 [Salmo salar]
Hk_0000977	234	9.78523e-80	ABV31710.1	transposase [Salmo salar]	100	ACN10560.1	Transposable element Tc1 transposase [Salmo salar]	100	ACN10560.1	Transposable element Tc1 transposase [Salmo salar]	308	XP_014053939.1	PREDICTED: uncharacterized protein LOC106604081 [Salmo salar]	271.166	ABV31710.1	transposase [Salmo salar]
Hk_0000978	222	9.78523e-80	ABV31710.1	transposase [Salmo salar]	100	ACN10560.1	Transposable element Tc1 transposase [Salmo salar]	100	ACN10560.1	Transposable element Tc1 transposase [Salmo salar]	308	XP_014053939.1	PREDICTED: uncharacterized protein LOC106604081 [Salmo salar]	271.166	ABV31710.1	transposase [Salmo salar]
Hk_0000979	225	9.80808e-80	ABV31710.1	transposase [Salmo salar]	100	ACN10560.1	Transposable element Tc1 transposase [Salmo salar]	100	ACN10560.1	Transposable element Tc1 transposase [Salmo salar]	285	XP_014012344.1	PREDICTED: uncharacterized protein LOC106578222 isoform X1 [Salmo salar]	271.166	ABV31710.1	transposase [Salmo salar]
Hk_0000980	401	9.55491e-105	ACI69264.1	Mannose-binding protein C precursor [Salmo salar]	100	ACN10214.1	Mannose-binding protein C precursor [Salmo salar]	100	ACI69264.1	Mannose-binding protein C precursor [Salmo salar]	285	XP_013996787.1	PREDICTED: uncharacterized protein LOC106569736 isoform X2 [Salmo salar]	335.495	ACI69264.1	Mannose-binding protein C precursor [Salmo salar]
Hk_0000981	407	9.39521e-105	ACI69264.1	Mannose-binding protein C precursor [Salmo salar]	100	ACN10214.1	Mannose-binding protein C precursor [Salmo salar]	100	ACI69264.1	Mannose-binding protein C precursor [Salmo salar]	285	XP_013996787.1	PREDICTED: uncharacterized protein LOC106569736 isoform X2 [Salmo salar]	335.495	ACI69264.1	Mannose-binding protein C precursor [Salmo salar]
Hk_0000982	344	4.74978e-116	ABV31711.1	transposase [Salmo salar]	100	ACN09907.1	40S ribosomal protein S2 [Salmo salar]	100	ACN09907.1	40S ribosomal protein S2 [Salmo salar]	315	ABV31710.1	transposase [Salmo salar]	374.785	ABV31711.1	transposase [Salmo salar]
Hk_0000983	242	4.04101e-91	XP_014058442.1	PREDICTED: 40S ribosomal protein S2-like, partial [Salmo salar]	100	XP_014058442.1	PREDICTED: 40S ribosomal protein S2-like, partial [Salmo salar]	100	XP_014058442.1	PREDICTED: 40S ribosomal protein S2-like, partial [Salmo salar]	335	ABV31710.1	transposase [Salmo salar]	300.442	ACN09907.1	40S ribosomal protein S2 [Salmo salar]
Hk_0000984	265	2.32581e-91	ACN09907.1	40S ribosomal protein S2 [Salmo salar]	100	ACN09907.1	40S ribosomal protein S2 [Salmo salar]	100	ACN09907.1	40S ribosomal protein S2 [Salmo salar]	335	ABV31710.1	transposase [Salmo salar]	302.368	ACN09907.1	40S ribosomal protein S2 [Salmo salar]
Hk_0000985	265	2.31508e-91	ACN09907.1	40S ribosomal protein S2 [Salmo salar]	100	ACN09907.1	40S ribosomal protein S2 [Salmo salar]	100	ACN09907.1	40S ribosomal protein S2 [Salmo salar]	335	ABV31710.1	transposase [Salmo salar]	302.368	ACN09907.1	40S ribosomal protein S2 [Salmo salar]
Hk_0000986	659	0	XP_014058600.1	PREDICTED: uncharacterized protein LOC106606767 [Salmo salar]	100	XP_014058600.1	PREDICTED: uncharacterized protein LOC106606767 [Salmo salar]	100	XP_014058600.1	PREDICTED: uncharacterized protein LOC106606767 [Salmo salar]	428	XP_014058600.1	PREDICTED: uncharacterized protein LOC106606767 [Salmo salar]	770.77	XP_014058600.1	PREDICTED: uncharacterized protein LOC106606767 [Salmo salar]
Hk_0000987	659	0	XP_014058600.1	PREDICTED: uncharacterized protein LOC106606767 [Salmo salar]	100	XP_014058600.1	PREDICTED: uncharacterized protein LOC106606767 [Salmo salar]	100	XP_014058600.1	PREDICTED: uncharacterized protein LOC106606767 [Salmo salar]	428	XP_014058600.1	PREDICTED: uncharacterized protein LOC106606767 [Salmo salar]	770.77	XP_014058600.1	PREDICTED: uncharacterized protein LOC106606767 [Salmo salar]
Hk_0000988	669	0	XP_014058600.1	PREDICTED: uncharacterized protein LOC106606767 [Salmo salar]	100	XP_014058600.1	PREDICTED: uncharacterized protein LOC106606767 [Salmo salar]	100	XP_014058600.1	PREDICTED: uncharacterized protein LOC106606767 [Salmo salar]	428	XP_014058600.1	PREDICTED: uncharacterized protein LOC106606767 [Salmo salar]	770.77	XP_014058600.1	PREDICTED: uncharacterized protein LOC106606767 [Salmo salar]
Hk_0000989	674	0	XP_014058600.1	PREDICTED: uncharacterized protein LOC106606767 [Salmo salar]	100	XP_014058600.1	PREDICTED: uncharacterized protein LOC106606767 [Salmo salar]	100	XP_014058600.1	PREDICTED: uncharacterized protein LOC106606767 [Salmo salar]	428	XP_014058600.1	PREDICTED: uncharacterized protein LOC106606767 [Salmo salar]	770.77	XP_014058600.1	PREDICTED: uncharacterized protein LOC106606767 [Salmo salar]
Hk_0000990	675	0	XP_014058600.1	PREDICTED: uncharacterized protein LOC106606767 [Salmo salar]	100	XP_014058600.1	PREDICTED: uncharacterized protein LOC106606767 [Salmo salar]	100	XP_014058600.1	PREDICTED: uncharacterized protein LOC106606767 [Salmo salar]	428	XP_014058600.1	PREDICTED: uncharacterized protein LOC106606767 [Salmo salar]	770.77	XP_014058600.1	PREDICTED: uncharacterized protein LOC106606767 [Salmo salar]
Hk_0000991	676	0	XP_014058600.1	PREDICTED: uncharacterized protein LOC106606767 [Salmo salar]	100	XP_014058600.1	PREDICTED: uncharacterized protein LOC106606767 [Salmo salar]	100	XP_014058600.1	PREDICTED: uncharacterized protein LOC106606767 [Salmo salar]	428	XP_014058600.1	PREDICTED: uncharacterized protein LOC106606767 [Salmo salar]	770.77	XP_014058600.1	PREDICTED: uncharacterized protein LOC106606767 [Salmo salar]
Hk_0000992	676	0	XP_014058600.1	PREDICTED: uncharacterized protein LOC106606767 [Salmo salar]	100	XP_014058600.1	PREDICTED: uncharacterized protein LOC106606767 [Salmo salar]	100	XP_014058600.1	PREDICTED: uncharacterized protein LOC106606767 [Salmo salar]	428	XP_014058600.1	PREDICTED: uncharacterized protein LOC106606767 [Salmo salar]	770.77	XP_014058600.1	PREDICTED: uncharacterized protein LOC106606767 [Salmo salar]
Hk_0000993	676	0	XP_014058600.1	PREDICTED: uncharacterized protein LOC106606767 [Salmo salar]	100	XP_014058600.1	PREDICTED: uncharacterized protein LOC106606767 [Salmo salar]	100	XP_014058600.1	PREDICTED: uncharacterized protein LOC106606767 [Salmo salar]	428	XP_014058600.1	PREDICTED: uncharacterized protein LOC106606767 [Salmo salar]	770.77	XP_014058600.1	PREDICTED: uncharacterized protein LOC106606767 [Salmo salar]
Hk_0000994	676	0	XP_014058600.1	PREDICTED: uncharacterized protein LOC106606767 [Salmo salar]	100	XP_014058600.1	PREDICTED: uncharacterized protein LOC106606767 [Salmo salar]	100	XP_014058600.1	PREDICTED: uncharacterized protein LOC106606767 [Salmo salar]	428	XP_014058600.1	PREDICTED: uncharacterized protein LOC106606767 [Salmo salar]	770.77	XP_014058600.1	PREDICTED: uncharacterized protein LOC106606767 [Salmo salar]
Hk_0000995	676	0	XP_014058600.1	PREDICTED: uncharacterized protein LOC106606767 [Salmo salar]	100	XP_014058600.1	PREDICTED: uncharacterized protein LOC106606767 [Salmo salar]	100	XP_014058600.1	PREDICTED: uncharacterized protein LOC106606767 [Salmo salar]	428	XP_014058600.1	PREDICTED: uncharacterized protein LOC106606767 [Salmo salar]	770.77	XP_014058600.1	PREDICTED: uncharacterized protein LOC106606767 [Salmo salar]
Hk_0000996	676	0	XP_014058600.1	PREDICTED: uncharacterized protein LOC106606767 [Salmo salar]	100	XP_014058600.1	PREDICTED: uncharacterized protein LOC106606767 [Salmo salar]	100	XP_014058600.1	PREDICTED: uncharacterized protein LOC106606767 [Salmo salar]	428	XP_014058600.1	PREDICTED: uncharacterized protein LOC106606767 [Salmo salar]	770.77	XP_014058600.1	PREDICTED: uncharacterized protein LOC106606767 [Salmo salar]
Hk_0000997	519	4.27233e-142	AKP40998.1	ORF2 protein [Salmo salar]	100	XP_014058779.1	PREDICTED: claudin-4-like [Salmo salar]	100	XP_014058779.1	PREDICTED: claudin-4-like [Salmo salar]	334	AKP40998.1	ORF2 protein [Salmo salar]	479.945	AKP40998.1	ORF2 protein [Salmo salar]
Hk_0000998	519	4.2746e-142	AKP40998.1	ORF2 protein [Salmo salar]	100	XP_014058779.1	PREDICTED: claudin-4-like [Salmo salar]	100	XP_014058779.1	PREDICTED: claudin-4-like [Salmo salar]	334	AKP40998.1	ORF2 protein [Salmo salar]	479.945	AKP40998.1	ORF2 protein [Salmo salar]
Hk_0000999	519	4.26328e-142	AKP40998.1	ORF2 protein [Salmo salar]	100	XP_014058779.1	PREDICTED: claudin-4-like [Salmo salar]	100	XP_014058779.1	PREDICTED: claudin-4-like [Salmo salar]	334	AKP40998.1	ORF2 protein [Salmo salar]	479.945	AKP40998.1	ORF2 protein [Salmo salar]
Hk_0001000	548	4.27384e-142	AKP40998.1	ORF2 protein [Salmo salar]	100	XP_014058779.1	PREDICTED: claudin-4-like [Salmo salar]	100	XP_014058779.1	PREDICTED: claudin-4-like [Salmo salar]	334	AKP40998.1	ORF2 protein [Salmo salar]	479.945	AKP40998.1	ORF2 protein [Salmo salar]
Hk_0001001	570	1.90829e-95	XP_014058815.1	PREDICTED: claudin-4-like [Salmo salar]	100	XP_014058815.1	PREDICTED: claudin-4-like [Salmo salar]	100	XP_014058815.1	PREDICTED: claudin-4-like [Salmo salar]	176	XP_014005370.1	PREDICTED: putative claudin-24, partial [Salmo salar]	310.842	XP_014058815.1	PREDICTED: claudin-4-like [Salmo salar]
Hk_0001002	571	1.91237e-95	XP_014058815.1	PREDICTED: claudin-4-like [Salmo salar]	100	XP_014058815.1	PREDICTED: claudin-4-like [Salmo salar]	100	XP_014058815.1	PREDICTED: claudin-4-like [Salmo salar]	176	XP_014005370.1	PREDICTED: putative claudin-24, partial [Salmo salar]	310.842	XP_014058815.1	PREDICTED: claudin-4-like [Salmo salar]
Hk_0001003	568	1.915e-95	XP_014058815.1	PREDICTED: claudin-4-like [Salmo salar]	100	XP_014058815.1	PREDICTED: claudin-4-like [Salmo salar]	100	XP_014058815.1	PREDICTED: claudin-4-like [Salmo salar]	176	XP_014005370.1	PREDICTED: putative claudin-24, partial [Salmo salar]	310.842	XP_014058815.1	PREDICTED: claudin-4-like [Salmo salar]
Hk_0001004	568	1.908e-95	XP_014058815.1	PREDICTED: claudin-4-like [Salmo salar]	100	XP_014058815.1	PREDICTED: claudin-4-like [Salmo salar]	100	XP_014058815.1	PREDICTED: claudin-4-like [Salmo salar]	176	XP_014005370.1	PREDICTED: putative claudin-24, partial [Salmo salar]	310.842	XP_014058815.1	PREDICTED: claudin-4-like [Salmo salar]
Hk_0001005	227	0	ACI33546.1	RUN domain-containing protein 1 [Salmo salar]	100	XP_014058874.1	PREDICTED: RUN domain-containing protein 1-like [Salmo salar]	100	ACI33546.1	RUN domain-containing protein 1 [Salmo salar]	450	AKP40998.1	ORF2 protein [Salmo salar]	598.586	ACI33546.1	RUN domain-containing protein 1 [Salmo salar]
Hk_0001006	227	0	ACI33546.1	RUN domain-containing protein 1 [Salmo salar]	100	XP_014058874.1	PREDICTED: RUN domain-containing protein 1-like [Salmo salar]	100	ACI33546.1	RUN domain-containing protein 1 [Salmo salar]	450	AKP40998.1	ORF2 protein [Salmo salar]	598.586	ACI33546.1	RUN domain-containing protein 1 [Salmo salar]
Hk_0001007	220	0	ACI33546.1	RUN domain-containing protein 1 [Salmo salar]	100	XP_014058874.1	PREDICTED: RUN domain-containing protein 1-like [Salmo salar]	100	ACI33546.1	RUN domain-containing protein 1 [Salmo salar]	450	AKP40998.1	ORF2 protein [Salmo salar]	598.586	ACI33546.1	RUN domain-containing protein 1 [Salmo salar]
Hk_0001008	421	1.40213e-135	ABV31711.1	transposase [Salmo salar]	100	ACH85333.1	ribosomal protein L3-like [Salmo salar]	100	ACH85333.1	ribosomal protein L3-like [Salmo salar]	171	XP_014004621.1	PREDICTED: uncharacterized protein LOC106573797, partial [Salmo salar]	327.791	ABV31711.1	transposase [Salmo salar]
Hk_0001009	421	1.40234e-135	ABV31711.1	transposase [Salmo salar]	100	ACH85333.1	ribosomal protein L3-like [Salmo salar]	100	ACH85333.1	ribosomal protein L3-like [Salmo salar]	166	ABV31711.1	transposase [Salmo salar]	327.791	ABV31711.1	transposase [Salmo salar]
Hk_0001010	379	1.39936e-135	ABV31711.1	transposase [Salmo salar]	100	ACH85333.1	ribosomal protein L3-like [Salmo salar]	100	ACH85333.1	ribosomal protein L3-like [Salmo salar]	166	ABV31711.1	transposase [Salmo salar]	327.791	ABV31711.1	transposase [Salmo salar]
Hk_0001011	379	1.40768e-135	ABV31711.1	transposase [Salmo salar]	100	ACH85333.1	ribosomal protein L3-like [Salmo salar]	100	ACH85333.1	ribosomal protein L3-like [Salmo salar]	166	ABV31711.1	transposase [Salmo salar]	327.791	ABV31711.1	transposase [Salmo salar]
Hk_0001012	378	1.42027e-135	ABV31711.1	transposase [Salmo salar]	100	ACH85333.1	ribosomal protein L3-like [Salmo salar]	100	ACH85333.1	ribosomal protein L3-like [Salmo salar]	166	ABV31711.1	transposase [Salmo salar]	327.791	ABV31711.1	transposase [Salmo salar]
Hk_0001013	378	1.40533e-135	ABV31711.1	transposase [Salmo salar]	100	ACH85333.1	ribosomal protein L3-like [Salmo salar]	100	ACH85333.1	ribosomal protein L3-like [Salmo salar]	166	ABV31711.1	transposase [Salmo salar]	327.791	ABV31711.1	transposase [Salmo salar]
Hk_0001014	847	2.10995e-130	ABV31711.1	transposase [Salmo salar]	100	CAA65953.1	beta-globin [Salmo salar]	100	CAA65953.1	beta-globin [Salmo salar]	235	AEB77813.1	olfactory receptor family C subfamily 2 member 2 [Salmo salar]	321.242	ABV31711.1	transposase [Salmo salar]
Hk_0001015	282	1.74584e-66	XP_014059350.1	PREDICTED: von Willebrand factor C domain-containing protein 2-like [Salmo salar]	100	XP_014059350.1	PREDICTED: von Willebrand factor C domain-containing protein 2-like [Salmo salar]	100	XP_014059350.1	PREDICTED: von Willebrand factor C domain-containing protein 2-like [Salmo salar]	229	ABV31711.1	transposase [Salmo salar]	229.18	XP_014059350.1	PREDICTED: von Willebrand factor C domain-containing protein 2-like [Salmo salar]
Hk_0001016	282	1.74718e-66	XP_014059350.1	PREDICTED: von Willebrand factor C domain-containing protein 2-like [Salmo salar]	100	XP_014059350.1	PREDICTED: von Willebrand factor C domain-containing protein 2-like [Salmo salar]	100	XP_014059350.1	PREDICTED: von Willebrand factor C domain-containing protein 2-like [Salmo salar]	229	ABV31711.1	transposase [Salmo salar]	229.18	XP_014059350.1	PREDICTED: von Willebrand factor C domain-containing protein 2-like [Salmo salar]
Hk_0001017	262	1.7429e-66	XP_014059350.1	PREDICTED: von Willebrand factor C domain-containing protein 2-like [Salmo salar]	100	XP_014059350.1	PREDICTED: von Willebrand factor C domain-containing protein 2-like [Salmo salar]	100	XP_014059350.1	PREDICTED: von Willebrand factor C domain-containing protein 2-like [Salmo salar]	229	ABV31711.1	transposase [Salmo salar]	229.18	XP_014059350.1	PREDICTED: von Willebrand factor C domain-containing protein 2-like [Salmo salar]
Hk_0001018	1068	5.34103e-77	XP_014062995.1	PREDICTED: DNA-directed RNA polymerase II subunit RPB1-like [Salmo salar]	100	ACN10044.1	Hemoglobin subunit alpha [Salmo salar]	100	ACN10044.1	Hemoglobin subunit alpha [Salmo salar]	271	XP_014062995.1	PREDICTED: DNA-directed RNA polymerase II subunit RPB1-like [Salmo salar]	264.233	XP_014062995.1	PREDICTED: DNA-directed RNA polymerase II subunit RPB1-like [Salmo salar]
Hk_0001019	1073	4.93642e-75	XP_014062995.1	PREDICTED: DNA-directed RNA polymerase II subunit RPB1-like [Salmo salar]	100	ACN10044.1	Hemoglobin subunit alpha [Salmo salar]	100	ACN10044.1	Hemoglobin subunit alpha [Salmo salar]	258	XP_014062995.1	PREDICTED: DNA-directed RNA polymerase II subunit RPB1-like [Salmo salar]	258.455	XP_014062995.1	PREDICTED: DNA-directed RNA polymerase II subunit RPB1-like [Salmo salar]
Hk_0001020	1089	3.06495e-66	ACN10024.1	Hemoglobin subunit beta [Salmo salar]	100	ACN10044.1	Hemoglobin subunit alpha [Salmo salar]	100	ACN10044.1	Hemoglobin subunit alpha [Salmo salar]	253	ABV31710.1	transposase [Salmo salar]	224.557	ACN10024.1	Hemoglobin subunit beta [Salmo salar]
Hk_0001021	1117	3.06541e-66	ACN10024.1	Hemoglobin subunit beta [Salmo salar]	100	ACN10044.1	Hemoglobin subunit alpha [Salmo salar]	100	ACN10044.1	Hemoglobin subunit alpha [Salmo salar]	253	ABV31710.1	transposase [Salmo salar]	224.557	ACN10024.1	Hemoglobin subunit beta [Salmo salar]
Hk_0001022	1105	3.06588e-66	ACN10024.1	Hemoglobin subunit beta [Salmo salar]	100	ACN10044.1	Hemoglobin subunit alpha [Salmo salar]	100	ACN10044.1	Hemoglobin subunit alpha [Salmo salar]	253	ABV31710.1	transposase [Salmo salar]	224.557	ACN10024.1	Hemoglobin subunit beta [Salmo salar]
Hk_0001023	1105	3.0682e-66	ACN10024.1	Hemoglobin subunit beta [Salmo salar]	100	ACN10044.1	Hemoglobin subunit alpha [Salmo salar]	100	ACN10044.1	Hemoglobin subunit alpha [Salmo salar]	253	ABV31710.1	transposase [Salmo salar]	224.557	ACN10024.1	Hemoglobin subunit beta [Salmo salar]
Hk_0001024	1096	3.06495e-66	ACN10024.1	Hemoglobin subunit beta [Salmo salar]	100	ACN10044.1	Hemoglobin subunit alpha [Salmo salar]	100	ACN10044.1	Hemoglobin subunit alpha [Salmo salar]	253	ABV31710.1	transposase [Salmo salar]	224.557	ACN10024.1	Hemoglobin subunit beta [Salmo salar]
Hk_0001025	1096	3.06495e-66	ACN10024.1	Hemoglobin subunit beta [Salmo salar]	100	ACN10044.1	Hemoglobin subunit alpha [Salmo salar]	100	ACN10044.1	Hemoglobin subunit alpha [Salmo salar]	253	ABV31710.1	transposase [Salmo salar]	224.557	ACN10024.1	Hemoglobin subunit beta [Salmo salar]
Hk_0001026	1098	3.06541e-66	ACN10024.1	Hemoglobin subunit beta [Salmo salar]	100	ACN10044.1	Hemoglobin subunit alpha [Salmo salar]	100	ACN10044.1	Hemoglobin subunit alpha [Salmo salar]	253	ABV31710.1	transposase [Salmo salar]	224.557	ACN10024.1	Hemoglobin subunit beta [Salmo salar]
Hk_0001027	1098	3.06495e-66	ACN10024.1	Hemoglobin subunit beta [Salmo salar]	100	ACN10044.1	Hemoglobin subunit alpha [Salmo salar]	100	ACN10044.1	Hemoglobin subunit alpha [Salmo salar]	253	ABV31710.1	transposase [Salmo salar]	224.557	ACN10024.1	Hemoglobin subunit beta [Salmo salar]
Hk_0001028	1098	3.07611e-66	ACN10024.1	Hemoglobin subunit beta [Salmo salar]	100	ACN10044.1	Hemoglobin subunit alpha [Salmo salar]	100	ACN10044.1	Hemoglobin subunit alpha [Salmo salar]	253	ABV31710.1	transposase [Salmo salar]	224.557	ACN10024.1	Hemoglobin subunit beta [Salmo salar]
Hk_0001029	998	3.07471e-66	ACN10024.1	Hemoglobin subunit beta [Salmo salar]	100	ACN10044.1	Hemoglobin subunit alpha [Salmo salar]	100	ACN10044.1	Hemoglobin subunit alpha [Salmo salar]	253	ABV31710.1	transposase [Salmo salar]	224.557	ACN10024.1	Hemoglobin subunit beta [Salmo salar]
Hk_0001030	1000	3.06867e-66	ACN10024.1	Hemoglobin subunit beta [Salmo salar]	100	ACN10044.1	Hemoglobin subunit alpha [Salmo salar]	100	ACN10044.1	Hemoglobin subunit alpha [Salmo salar]	253	ABV31710.1	transposase [Salmo salar]	224.557	ACN10024.1	Hemoglobin subunit beta [Salmo salar]
Hk_0001031	1000	3.06495e-66	ACN10024.1	Hemoglobin subunit beta [Salmo salar]	100	ACN10044.1	Hemoglobin subunit alpha [Salmo salar]	100	ACN10044.1	Hemoglobin subunit alpha [Salmo salar]	253	ABV31710.1	transposase [Salmo salar]	224.557	ACN10024.1	Hemoglobin subunit beta [Salmo salar]
Hk_0001032	1001	3.06495e-66	ACN10024.1	Hemoglobin subunit beta [Salmo salar]	100	ACN10044.1	Hemoglobin subunit alpha [Salmo salar]	100	ACN10044.1	Hemoglobin subunit alpha [Salmo salar]	253	ABV31710.1	transposase [Salmo salar]	224.557	ACN10024.1	Hemoglobin subunit beta [Salmo salar]
Hk_0001033	1002	3.06541e-66	ACN10024.1	Hemoglobin subunit beta [Salmo salar]	100	ACN10044.1	Hemoglobin subunit alpha [Salmo salar]	100	ACN10044.1	Hemoglobin subunit alpha [Salmo salar]	253	ABV31710.1	transposase [Salmo salar]	224.557	ACN10024.1	Hemoglobin subunit beta [Salmo salar]
Hk_0001034	1002	3.06774e-66	ACN10024.1	Hemoglobin subunit beta [Salmo salar]	100	ACN10044.1	Hemoglobin subunit alpha [Salmo salar]	100	ACN10044.1	Hemoglobin subunit alpha [Salmo salar]	253	ABV31710.1	transposase [Salmo salar]	224.557	ACN10024.1	Hemoglobin subunit beta [Salmo salar]
Hk_0001035	1004	3.06774e-66	ACN10024.1	Hemoglobin subunit beta [Salmo salar]	100	ACN10044.1	Hemoglobin subunit alpha [Salmo salar]	100	ACN10044.1	Hemoglobin subunit alpha [Salmo salar]	272	XP_014009224.1	PREDICTED: uncharacterized protein LOC106576526 [Salmo salar]	224.557	ACN10024.1	Hemoglobin subunit beta [Salmo salar]
Hk_0001036	1004	3.06634e-66	ACN10024.1	Hemoglobin subunit beta [Salmo salar]	100	ACN10044.1	Hemoglobin subunit alpha [Salmo salar]	100	ACN10044.1	Hemoglobin subunit alpha [Salmo salar]	272	XP_014009224.1	PREDICTED: uncharacterized protein LOC106576526 [Salmo salar]	224.557	ACN10024.1	Hemoglobin subunit beta [Salmo salar]
Hk_0001037	1004	3.06541e-66	ACN10024.1	Hemoglobin subunit beta [Salmo salar]	100	ACN10044.1	Hemoglobin subunit alpha [Salmo salar]	100	ACN10044.1	Hemoglobin subunit alpha [Salmo salar]	272	XP_014009224.1	PREDICTED: uncharacterized protein LOC106576526 [Salmo salar]	224.557	ACN10024.1	Hemoglobin subunit beta [Salmo salar]
Hk_0001038	1004	3.0682e-66	ACN10024.1	Hemoglobin subunit beta [Salmo salar]	100	ACN10044.1	Hemoglobin subunit alpha [Salmo salar]	100	ACN10044.1	Hemoglobin subunit alpha [Salmo salar]	272	XP_014009224.1	PREDICTED: uncharacterized protein LOC106576526 [Salmo salar]	224.557	ACN10024.1	Hemoglobin subunit beta [Salmo salar]
Hk_0001039	1004	3.06774e-66	ACN10024.1	Hemoglobin subunit beta [Salmo salar]	100	ACN10044.1	Hemoglobin subunit alpha [Salmo salar]	100	ACN10044.1	Hemoglobin subunit alpha [Salmo salar]	272	XP_014009224.1	PREDICTED: uncharacterized protein LOC106576526 [Salmo salar]	224.557	ACN10024.1	Hemoglobin subunit beta [Salmo salar]
Hk_0001040	1004	3.08216e-66	ACN10024.1	Hemoglobin subunit beta [Salmo salar]	100	ACN10044.1	Hemoglobin subunit alpha [Salmo salar]	100	ACN10044.1	Hemoglobin subunit alpha [Salmo salar]	272	XP_014009224.1	PREDICTED: uncharacterized protein LOC106576526 [Salmo salar]	224.557	ACN10024.1	Hemoglobin subunit beta [Salmo salar]
Hk_0001041	340	4.96488e-75	ABV31710.1	transposase [Salmo salar]	100	ACI66616.1	40S ribosomal protein S11 [Salmo salar]	100	ACI68815.1	40S ribosomal protein S11 [Salmo salar]	177	ABV31711.1	transposase [Salmo salar]	197.208	ABV31710.1	transposase [Salmo salar]
Hk_0001042	344	4.96187e-75	ABV31710.1	transposase [Salmo salar]	100	ACI66616.1	40S ribosomal protein S11 [Salmo salar]	100	ACI68815.1	40S ribosomal protein S11 [Salmo salar]	177	ABV31711.1	transposase [Salmo salar]	197.208	ABV31710.1	transposase [Salmo salar]
Hk_0001043	348	4.94985e-75	ABV31710.1	transposase [Salmo salar]	100	ACI66616.1	40S ribosomal protein S11 [Salmo salar]	100	ACI68815.1	40S ribosomal protein S11 [Salmo salar]	177	ABV31711.1	transposase [Salmo salar]	197.208	ABV31710.1	transposase [Salmo salar]
Hk_0001044	351	4.96488e-75	ABV31710.1	transposase [Salmo salar]	100	ACI66616.1	40S ribosomal protein S11 [Salmo salar]	100	ACI68815.1	40S ribosomal protein S11 [Salmo salar]	177	ABV31711.1	transposase [Salmo salar]	197.208	ABV31710.1	transposase [Salmo salar]
Hk_0001045	196	2.39664e-125	ABV31711.1	transposase [Salmo salar]	100	ACH70808.1	ribosomal protein L19 [Salmo salar]	100	ACH70808.1	ribosomal protein L19 [Salmo salar]	329	ACH85309.1	transposase-like [Salmo salar]	401.364	ABV31711.1	transposase [Salmo salar]
Hk_0001046	196	2.39516e-125	ABV31711.1	transposase [Salmo salar]	100	ACH70808.1	ribosomal protein L19 [Salmo salar]	100	ACH70808.1	ribosomal protein L19 [Salmo salar]	329	ACH85309.1	transposase-like [Salmo salar]	401.364	ABV31711.1	transposase [Salmo salar]
Hk_0001047	182	2.39627e-125	ABV31711.1	transposase [Salmo salar]	100	ACH70808.1	ribosomal protein L19 [Salmo salar]	100	ACH70808.1	ribosomal protein L19 [Salmo salar]	329	ACH85309.1	transposase-like [Salmo salar]	401.364	ABV31711.1	transposase [Salmo salar]
Hk_0001048	182	2.38998e-125	ABV31711.1	transposase [Salmo salar]	100	ACH70808.1	ribosomal protein L19 [Salmo salar]	100	ACH70808.1	ribosomal protein L19 [Salmo salar]	329	ACH85309.1	transposase-like [Salmo salar]	401.364	ABV31711.1	transposase [Salmo salar]
Hk_0001049	418	1.55598e-155	ACN60195.1	Retrotransposable element Tf2 155 kDa protein type 3, partial [Salmo salar]	100	XP_014060869.1	PREDICTED: 40S ribosomal protein S17-like [Salmo salar]	100	XP_014060869.1	PREDICTED: 40S ribosomal protein S17-like [Salmo salar]	494	ACN60195.1	Retrotransposable element Tf2 155 kDa protein type 3, partial [Salmo salar]	499.975	ACN60195.1	Retrotransposable element Tf2 155 kDa protein type 3, partial [Salmo salar]
Hk_0001050	300	0	XP_014061288.1	PREDICTED: alpha-1,6-mannosyl-glycoprotein 2-beta-N-acetylglucosaminyltransferase isoform X1 [Salmo salar]	100	XP_014061288.1	PREDICTED: alpha-1,6-mannosyl-glycoprotein 2-beta-N-acetylglucosaminyltransferase isoform X1 [Salmo salar]	100	XP_014061288.1	PREDICTED: alpha-1,6-mannosyl-glycoprotein 2-beta-N-acetylglucosaminyltransferase isoform X1 [Salmo salar]	288	XP_014061288.1	PREDICTED: alpha-1,6-mannosyl-glycoprotein 2-beta-N-acetylglucosaminyltransferase isoform X1 [Salmo salar]	572.007	XP_014061288.1	PREDICTED: alpha-1,6-mannosyl-glycoprotein 2-beta-N-acetylglucosaminyltransferase isoform X1 [Salmo salar]
Hk_0001051	300	0	XP_014061288.1	PREDICTED: alpha-1,6-mannosyl-glycoprotein 2-beta-N-acetylglucosaminyltransferase isoform X1 [Salmo salar]	100	XP_014061288.1	PREDICTED: alpha-1,6-mannosyl-glycoprotein 2-beta-N-acetylglucosaminyltransferase isoform X1 [Salmo salar]	100	XP_014061288.1	PREDICTED: alpha-1,6-mannosyl-glycoprotein 2-beta-N-acetylglucosaminyltransferase isoform X1 [Salmo salar]	386	XP_014061288.1	PREDICTED: alpha-1,6-mannosyl-glycoprotein 2-beta-N-acetylglucosaminyltransferase isoform X1 [Salmo salar]	782.711	XP_014061288.1	PREDICTED: alpha-1,6-mannosyl-glycoprotein 2-beta-N-acetylglucosaminyltransferase isoform X1 [Salmo salar]
Hk_0001052	301	0	XP_014061288.1	PREDICTED: alpha-1,6-mannosyl-glycoprotein 2-beta-N-acetylglucosaminyltransferase isoform X1 [Salmo salar]	100	XP_014061288.1	PREDICTED: alpha-1,6-mannosyl-glycoprotein 2-beta-N-acetylglucosaminyltransferase isoform X1 [Salmo salar]	100	XP_014061288.1	PREDICTED: alpha-1,6-mannosyl-glycoprotein 2-beta-N-acetylglucosaminyltransferase isoform X1 [Salmo salar]	443	XP_014061288.1	PREDICTED: alpha-1,6-mannosyl-glycoprotein 2-beta-N-acetylglucosaminyltransferase isoform X1 [Salmo salar]	901.353	XP_014061288.1	PREDICTED: alpha-1,6-mannosyl-glycoprotein 2-beta-N-acetylglucosaminyltransferase isoform X1 [Salmo salar]
Hk_0001053	905	2.25592e-42	ABV31710.1	transposase [Salmo salar]	100	XP_014061298.1	PREDICTED: ribonuclease H1-like isoform X1 [Salmo salar]	100	XP_014061298.1	PREDICTED: ribonuclease H1-like isoform X1 [Salmo salar]	177	XP_014037959.1	PREDICTED: uncharacterized protein LOC106591269 isoform X1 [Salmo salar]	159.073	ACJ02102.1	SPATA5 [Salmo salar]
Hk_0001054	901	2.2481e-42	ABV31710.1	transposase [Salmo salar]	100	XP_014061298.1	PREDICTED: ribonuclease H1-like isoform X1 [Salmo salar]	100	XP_014061298.1	PREDICTED: ribonuclease H1-like isoform X1 [Salmo salar]	177	XP_014037959.1	PREDICTED: uncharacterized protein LOC106591269 isoform X1 [Salmo salar]	159.073	ACJ02102.1	SPATA5 [Salmo salar]
Hk_0001055	899	2.25728e-42	ABV31710.1	transposase [Salmo salar]	100	XP_014061298.1	PREDICTED: ribonuclease H1-like isoform X1 [Salmo salar]	100	XP_014061298.1	PREDICTED: ribonuclease H1-like isoform X1 [Salmo salar]	177	XP_014037959.1	PREDICTED: uncharacterized protein LOC106591269 isoform X1 [Salmo salar]	159.073	ACJ02102.1	SPATA5 [Salmo salar]
Hk_0001056	897	2.24538e-42	ABV31710.1	transposase [Salmo salar]	100	XP_014061298.1	PREDICTED: ribonuclease H1-like isoform X1 [Salmo salar]	100	XP_014061298.1	PREDICTED: ribonuclease H1-like isoform X1 [Salmo salar]	177	XP_014037959.1	PREDICTED: uncharacterized protein LOC106591269 isoform X1 [Salmo salar]	159.073	ACJ02102.1	SPATA5 [Salmo salar]
Hk_0001057	897	2.24912e-42	ABV31710.1	transposase [Salmo salar]	100	XP_014061298.1	PREDICTED: ribonuclease H1-like isoform X1 [Salmo salar]	100	XP_014061298.1	PREDICTED: ribonuclease H1-like isoform X1 [Salmo salar]	177	XP_014037959.1	PREDICTED: uncharacterized protein LOC106591269 isoform X1 [Salmo salar]	159.073	ACJ02102.1	SPATA5 [Salmo salar]
Hk_0001058	238	9.79741e-80	ABV31710.1	transposase [Salmo salar]	100	ACN10560.1	Transposable element Tc1 transposase [Salmo salar]	100	ACN10560.1	Transposable element Tc1 transposase [Salmo salar]	308	XP_014053939.1	PREDICTED: uncharacterized protein LOC106604081 [Salmo salar]	271.166	ABV31710.1	transposase [Salmo salar]
Hk_0001059	222	9.7898e-80	ABV31710.1	transposase [Salmo salar]	100	ACN10560.1	Transposable element Tc1 transposase [Salmo salar]	100	ACN10560.1	Transposable element Tc1 transposase [Salmo salar]	308	XP_014053939.1	PREDICTED: uncharacterized protein LOC106604081 [Salmo salar]	271.166	ABV31710.1	transposase [Salmo salar]
Hk_0001060	225	9.8096e-80	ABV31710.1	transposase [Salmo salar]	100	ACN10560.1	Transposable element Tc1 transposase [Salmo salar]	100	ACN10560.1	Transposable element Tc1 transposase [Salmo salar]	285	XP_014012344.1	PREDICTED: uncharacterized protein LOC106578222 isoform X1 [Salmo salar]	271.166	ABV31710.1	transposase [Salmo salar]
Hk_0000833	741	1.4867e-50	XP_014065607.1	PREDICTED: heterogeneous nuclear ribonucleoprotein R-like isoform X3 [Salmo salar]	100	XP_014065607.1	PREDICTED: heterogeneous nuclear ribonucleoprotein R-like isoform X3 [Salmo salar]	100	XP_014065607.1	PREDICTED: heterogeneous nuclear ribonucleoprotein R-like isoform X3 [Salmo salar]	306	AKP40998.1	ORF2 protein [Salmo salar]	171.014	AKP40998.1	ORF2 protein [Salmo salar]
Hk_0000834	732	7.47399e-73	ACI66028.1	Transposable element Tcb1 transposase [Salmo salar]	100	XP_014065607.1	PREDICTED: heterogeneous nuclear ribonucleoprotein R-like isoform X3 [Salmo salar]	100	XP_014065607.1	PREDICTED: heterogeneous nuclear ribonucleoprotein R-like isoform X3 [Salmo salar]	306	AKP40998.1	ORF2 protein [Salmo salar]	249.595	ACI66028.1	Transposable element Tcb1 transposase [Salmo salar]
Hk_0000835	750	7.48441e-73	ACI66028.1	Transposable element Tcb1 transposase [Salmo salar]	100	XP_014065607.1	PREDICTED: heterogeneous nuclear ribonucleoprotein R-like isoform X3 [Salmo salar]	100	XP_014065607.1	PREDICTED: heterogeneous nuclear ribonucleoprotein R-like isoform X3 [Salmo salar]	306	AKP40998.1	ORF2 protein [Salmo salar]	249.595	ACI66028.1	Transposable element Tcb1 transposase [Salmo salar]
Hk_0000836	278	3.44376e-136	ABV31711.1	transposase [Salmo salar]	100	XP_014062969.1	PREDICTED: bromodomain-containing protein 1-like, partial [Salmo salar]	100	XP_014062969.1	PREDICTED: bromodomain-containing protein 1-like, partial [Salmo salar]	340	ABV31710.1	transposase [Salmo salar]	346.28	ABV31711.1	transposase [Salmo salar]
Hk_0000837	362	4.98737e-40	XP_014047293.1	PREDICTED: uncharacterized protein LOC106600457 [Salmo salar]	100	ACM08389.1	Cysteine-rich protein 1 [Salmo salar]	100	ACM08389.1	Cysteine-rich protein 1 [Salmo salar]	398	AKP40998.1	ORF2 protein [Salmo salar]	153.68	XP_014047293.1	PREDICTED: uncharacterized protein LOC106600457 [Salmo salar]
Hk_0000838	304	7.15336e-144	ABV31711.1	transposase [Salmo salar]	100	ACN10296.1	60S ribosomal protein L36a [Salmo salar]	100	ABV31711.1	transposase [Salmo salar]	235	AEB77813.1	olfactory receptor family C subfamily 2 member 2 [Salmo salar]	387.882	ABV31711.1	transposase [Salmo salar]
Hk_0000839	256	2.85308e-162	AKP40998.1	ORF2 protein [Salmo salar]	100	ACN10296.1	60S ribosomal protein L36a [Salmo salar]	100	ABV31711.1	transposase [Salmo salar]	235	AEB77813.1	olfactory receptor family C subfamily 2 member 2 [Salmo salar]	387.882	ABV31711.1	transposase [Salmo salar]
Hk_0000840	194	5.00424e-82	ACN11475.1	Transposable element Tcb1 transposase [Salmo salar]	100	XP_014067971.1	PREDICTED: uncharacterized protein LOC106611873 [Salmo salar]	100	XP_014067971.1	PREDICTED: uncharacterized protein LOC106611873 [Salmo salar]	259	ACN11475.1	Transposable element Tcb1 transposase [Salmo salar]	275.404	ACN11475.1	Transposable element Tcb1 transposase [Salmo salar]
Hk_0000841	540	3.36717e-79	XP_014067963.1	PREDICTED: bifunctional heparan sulfate N-deacetylase/N-sulfotransferase 1-like [Salmo salar]	100	XP_014067963.1	PREDICTED: bifunctional heparan sulfate N-deacetylase/N-sulfotransferase 1-like [Salmo salar]	100	XP_014067963.1	PREDICTED: bifunctional heparan sulfate N-deacetylase/N-sulfotransferase 1-like [Salmo salar]	212	ACH85309.1	transposase-like [Salmo salar]	233.802	ACN11475.1	Transposable element Tcb1 transposase [Salmo salar]
Hk_0000842	393	2.66016e-133	ACH85309.1	transposase-like [Salmo salar]	100	ACH70981.1	ribosomal protein L26 [Salmo salar]	100	ACH70981.1	ribosomal protein L26 [Salmo salar]	243	XP_013988342.1	PREDICTED: uncharacterized protein LOC106565584 [Salmo salar]	306.99	XP_013988342.1	PREDICTED: uncharacterized protein LOC106565584 [Salmo salar]
Hk_0000843	394	2.65694e-133	ACH85309.1	transposase-like [Salmo salar]	100	ACH70981.1	ribosomal protein L26 [Salmo salar]	100	ACH70981.1	ribosomal protein L26 [Salmo salar]	243	XP_013988342.1	PREDICTED: uncharacterized protein LOC106565584 [Salmo salar]	306.99	XP_013988342.1	PREDICTED: uncharacterized protein LOC106565584 [Salmo salar]
Hk_0000844	355	2.64928e-133	ACH85309.1	transposase-like [Salmo salar]	100	ACH70981.1	ribosomal protein L26 [Salmo salar]	100	ACH70981.1	ribosomal protein L26 [Salmo salar]	243	XP_013988342.1	PREDICTED: uncharacterized protein LOC106565584 [Salmo salar]	306.99	XP_013988342.1	PREDICTED: uncharacterized protein LOC106565584 [Salmo salar]
Hk_0000845	151	2.95769e-112	ABV31711.1	transposase [Salmo salar]	100	ACN09951.1	60S ribosomal protein L35a [Salmo salar]	100	AEB77813.1	olfactory receptor family C subfamily 2 member 2 [Salmo salar]	148	AKP40998.1	ORF2 protein [Salmo salar]	192.971	ABV31711.1	transposase [Salmo salar]
Hk_0000846	185	2.97294e-112	ABV31711.1	transposase [Salmo salar]	100	ACN09951.1	60S ribosomal protein L35a [Salmo salar]	100	AEB77813.1	olfactory receptor family C subfamily 2 member 2 [Salmo salar]	148	AKP40998.1	ORF2 protein [Salmo salar]	192.971	ABV31711.1	transposase [Salmo salar]
Hk_0000847	143	6.4418e-24	AKP41003.1	hypothetical protein [Salmo salar]	100	XP_014036893.1	PREDICTED: ras-responsive element-binding protein 1-like isoform X2 [Salmo salar]	100	XP_014012410.1	PREDICTED: protein kinase C and casein kinase substrate in neurons protein 2-like [Salmo salar]	201	AKP40998.1	ORF2 protein [Salmo salar]	114.775	AKP40998.1	ORF2 protein [Salmo salar]
Hk_0000848	371	9.21958e-63	XP_014070030.1	PREDICTED: BTB/POZ domain-containing protein KCTD14 isoform X3 [Salmo salar]	100	XP_014070030.1	PREDICTED: BTB/POZ domain-containing protein KCTD14 isoform X3 [Salmo salar]	100	XP_014070030.1	PREDICTED: BTB/POZ domain-containing protein KCTD14 isoform X3 [Salmo salar]	436	AKP40998.1	ORF2 protein [Salmo salar]	218.779	XP_014070027.1	PREDICTED: BTB/POZ domain-containing protein KCTD14 isoform X1 [Salmo salar]
Hk_0000849	243	6.29718e-102	XP_014070232.1	PREDICTED: trafficking protein particle complex subunit 4 [Salmo salar]	100	XP_014070229.1	PREDICTED: glucose-6-phosphate translocase-like [Salmo salar]	100	XP_014070229.1	PREDICTED: glucose-6-phosphate translocase-like [Salmo salar]	212	ABV31711.1	transposase [Salmo salar]	235.728	ACI68348.1	40S ribosomal protein S25 [Salmo salar]
Hk_0000850	278	6.30382e-102	XP_014070232.1	PREDICTED: trafficking protein particle complex subunit 4 [Salmo salar]	100	XP_014070229.1	PREDICTED: glucose-6-phosphate translocase-like [Salmo salar]	100	XP_014018339.1	PREDICTED: glucose-6-phosphate translocase-like isoform X2 [Salmo salar]	248	ABV31710.1	transposase [Salmo salar]	235.728	ACI68348.1	40S ribosomal protein S25 [Salmo salar]
Hk_0000851	281	6.27631e-102	XP_014070232.1	PREDICTED: trafficking protein particle complex subunit 4 [Salmo salar]	100	XP_014070229.1	PREDICTED: glucose-6-phosphate translocase-like [Salmo salar]	100	XP_014018339.1	PREDICTED: glucose-6-phosphate translocase-like isoform X2 [Salmo salar]	248	ABV31710.1	transposase [Salmo salar]	235.728	ACI68348.1	40S ribosomal protein S25 [Salmo salar]
Hk_0000852	742	1.48737e-50	XP_014065607.1	PREDICTED: heterogeneous nuclear ribonucleoprotein R-like isoform X3 [Salmo salar]	100	XP_014065607.1	PREDICTED: heterogeneous nuclear ribonucleoprotein R-like isoform X3 [Salmo salar]	100	XP_014065607.1	PREDICTED: heterogeneous nuclear ribonucleoprotein R-like isoform X3 [Salmo salar]	306	AKP40998.1	ORF2 protein [Salmo salar]	171.014	AKP40998.1	ORF2 protein [Salmo salar]
Hk_0000853	732	7.47631e-73	ACI66028.1	Transposable element Tcb1 transposase [Salmo salar]	100	XP_014065607.1	PREDICTED: heterogeneous nuclear ribonucleoprotein R-like isoform X3 [Salmo salar]	100	XP_014065607.1	PREDICTED: heterogeneous nuclear ribonucleoprotein R-like isoform X3 [Salmo salar]	306	AKP40998.1	ORF2 protein [Salmo salar]	249.595	ACI66028.1	Transposable element Tcb1 transposase [Salmo salar]
Hk_0000854	750	7.48441e-73	ACI66028.1	Transposable element Tcb1 transposase [Salmo salar]	100	XP_014065607.1	PREDICTED: heterogeneous nuclear ribonucleoprotein R-like isoform X3 [Salmo salar]	100	XP_014065607.1	PREDICTED: heterogeneous nuclear ribonucleoprotein R-like isoform X3 [Salmo salar]	306	AKP40998.1	ORF2 protein [Salmo salar]	249.595	ACI66028.1	Transposable element Tcb1 transposase [Salmo salar]
Hk_0000855	278	3.44376e-136	ABV31711.1	transposase [Salmo salar]	100	XP_014062969.1	PREDICTED: bromodomain-containing protein 1-like, partial [Salmo salar]	100	XP_014062969.1	PREDICTED: bromodomain-containing protein 1-like, partial [Salmo salar]	340	ABV31710.1	transposase [Salmo salar]	346.28	ABV31711.1	transposase [Salmo salar]
Hk_0000856	273	5.60758e-48	XP_014047293.1	PREDICTED: uncharacterized protein LOC106600457 [Salmo salar]	100	ACM08389.1	Cysteine-rich protein 1 [Salmo salar]	100	ACM08389.1	Cysteine-rich protein 1 [Salmo salar]	274	AKP40998.1	ORF2 protein [Salmo salar]	176.792	XP_014047293.1	PREDICTED: uncharacterized protein LOC106600457 [Salmo salar]
Hk_0000857	362	4.99814e-40	XP_014047293.1	PREDICTED: uncharacterized protein LOC106600457 [Salmo salar]	100	ACM08389.1	Cysteine-rich protein 1 [Salmo salar]	100	ACM08389.1	Cysteine-rich protein 1 [Salmo salar]	398	AKP40998.1	ORF2 protein [Salmo salar]	153.68	XP_014047293.1	PREDICTED: uncharacterized protein LOC106600457 [Salmo salar]
Hk_0000858	548	4.9966e-40	XP_014047293.1	PREDICTED: uncharacterized protein LOC106600457 [Salmo salar]	100	ACM08389.1	Cysteine-rich protein 1 [Salmo salar]	100	ACM08389.1	Cysteine-rich protein 1 [Salmo salar]	398	AKP40998.1	ORF2 protein [Salmo salar]	153.68	XP_014047293.1	PREDICTED: uncharacterized protein LOC106600457 [Salmo salar]
Hk_0000859	304	7.16209e-144	ABV31711.1	transposase [Salmo salar]	100	ACN10296.1	60S ribosomal protein L36a [Salmo salar]	100	ABV31711.1	transposase [Salmo salar]	235	AEB77813.1	olfactory receptor family C subfamily 2 member 2 [Salmo salar]	387.882	ABV31711.1	transposase [Salmo salar]
Hk_0000860	256	2.85482e-162	AKP40998.1	ORF2 protein [Salmo salar]	100	ACN10296.1	60S ribosomal protein L36a [Salmo salar]	100	ABV31711.1	transposase [Salmo salar]	235	AEB77813.1	olfactory receptor family C subfamily 2 member 2 [Salmo salar]	387.882	ABV31711.1	transposase [Salmo salar]
Hk_0000861	280	0	XP_014056412.1	PREDICTED: uncharacterized protein LOC106605384, partial [Salmo salar]	100	ABV31711.1	transposase [Salmo salar]	100	ABV31711.1	transposase [Salmo salar]	291	XP_013988196.1	PREDICTED: uncharacterized protein LOC106565503 [Salmo salar]	432.565	XP_014056412.1	PREDICTED: uncharacterized protein LOC106605384, partial [Salmo salar]
Hk_0000862	280	0	XP_014056412.1	PREDICTED: uncharacterized protein LOC106605384, partial [Salmo salar]	100	ABV31711.1	transposase [Salmo salar]	100	ABV31711.1	transposase [Salmo salar]	291	XP_013988196.1	PREDICTED: uncharacterized protein LOC106565503 [Salmo salar]	432.565	XP_014056412.1	PREDICTED: uncharacterized protein LOC106605384, partial [Salmo salar]
Hk_0000863	323	0	XP_014056412.1	PREDICTED: uncharacterized protein LOC106605384, partial [Salmo salar]	100	ABV31711.1	transposase [Salmo salar]	100	ABV31711.1	transposase [Salmo salar]	275	AKP40998.1	ORF2 protein [Salmo salar]	432.565	XP_014056412.1	PREDICTED: uncharacterized protein LOC106605384, partial [Salmo salar]
Hk_0000864	194	5.00347e-82	ACN11475.1	Transposable element Tcb1 transposase [Salmo salar]	100	XP_014067971.1	PREDICTED: uncharacterized protein LOC106611873 [Salmo salar]	100	XP_014067971.1	PREDICTED: uncharacterized protein LOC106611873 [Salmo salar]	259	ACN11475.1	Transposable element Tcb1 transposase [Salmo salar]	275.404	ACN11475.1	Transposable element Tcb1 transposase [Salmo salar]
Hk_0000865	394	2.66137e-133	ACH85309.1	transposase-like [Salmo salar]	100	ACH70981.1	ribosomal protein L26 [Salmo salar]	100	ACH70981.1	ribosomal protein L26 [Salmo salar]	243	XP_013988342.1	PREDICTED: uncharacterized protein LOC106565584 [Salmo salar]	306.99	XP_013988342.1	PREDICTED: uncharacterized protein LOC106565584 [Salmo salar]
Hk_0000866	394	2.65814e-133	ACH85309.1	transposase-like [Salmo salar]	100	ACH70981.1	ribosomal protein L26 [Salmo salar]	100	ACH70981.1	ribosomal protein L26 [Salmo salar]	243	XP_013988342.1	PREDICTED: uncharacterized protein LOC106565584 [Salmo salar]	306.99	XP_013988342.1	PREDICTED: uncharacterized protein LOC106565584 [Salmo salar]
Hk_0000867	358	2.6521e-133	ACH85309.1	transposase-like [Salmo salar]	100	ACH70981.1	ribosomal protein L26 [Salmo salar]	100	ACH70981.1	ribosomal protein L26 [Salmo salar]	243	XP_013988342.1	PREDICTED: uncharacterized protein LOC106565584 [Salmo salar]	306.99	XP_013988342.1	PREDICTED: uncharacterized protein LOC106565584 [Salmo salar]
Hk_0000868	149	2.95859e-112	ABV31711.1	transposase [Salmo salar]	100	ACN09951.1	60S ribosomal protein L35a [Salmo salar]	100	AEB77813.1	olfactory receptor family C subfamily 2 member 2 [Salmo salar]	148	AKP40998.1	ORF2 protein [Salmo salar]	192.971	ABV31711.1	transposase [Salmo salar]
Hk_0000869	185	2.97339e-112	ABV31711.1	transposase [Salmo salar]	100	ACN09951.1	60S ribosomal protein L35a [Salmo salar]	100	AEB77813.1	olfactory receptor family C subfamily 2 member 2 [Salmo salar]	148	AKP40998.1	ORF2 protein [Salmo salar]	192.971	ABV31711.1	transposase [Salmo salar]
Hk_0000870	143	6.44387e-24	AKP41003.1	hypothetical protein [Salmo salar]	100	XP_014036893.1	PREDICTED: ras-responsive element-binding protein 1-like isoform X2 [Salmo salar]	100	XP_014012410.1	PREDICTED: protein kinase C and casein kinase substrate in neurons protein 2-like [Salmo salar]	201	AKP40998.1	ORF2 protein [Salmo salar]	114.775	AKP40998.1	ORF2 protein [Salmo salar]
Hk_0000871	372	9.23516e-63	XP_014070030.1	PREDICTED: BTB/POZ domain-containing protein KCTD14 isoform X3 [Salmo salar]	100	XP_014070030.1	PREDICTED: BTB/POZ domain-containing protein KCTD14 isoform X3 [Salmo salar]	100	XP_014070030.1	PREDICTED: BTB/POZ domain-containing protein KCTD14 isoform X3 [Salmo salar]	436	AKP40998.1	ORF2 protein [Salmo salar]	218.779	XP_014070027.1	PREDICTED: BTB/POZ domain-containing protein KCTD14 isoform X1 [Salmo salar]
Hk_0000872	243	6.29813e-102	XP_014070232.1	PREDICTED: trafficking protein particle complex subunit 4 [Salmo salar]	100	XP_014070229.1	PREDICTED: glucose-6-phosphate translocase-like [Salmo salar]	100	XP_014070229.1	PREDICTED: glucose-6-phosphate translocase-like [Salmo salar]	212	ABV31711.1	transposase [Salmo salar]	235.728	ACI68348.1	40S ribosomal protein S25 [Salmo salar]
Hk_0000873	279	6.30382e-102	XP_014070232.1	PREDICTED: trafficking protein particle complex subunit 4 [Salmo salar]	100	XP_014070229.1	PREDICTED: glucose-6-phosphate translocase-like [Salmo salar]	100	XP_014018339.1	PREDICTED: glucose-6-phosphate translocase-like isoform X2 [Salmo salar]	248	ABV31710.1	transposase [Salmo salar]	235.728	ACI68348.1	40S ribosomal protein S25 [Salmo salar]
Hk_0000874	281	6.27631e-102	XP_014070232.1	PREDICTED: trafficking protein particle complex subunit 4 [Salmo salar]	100	XP_014070229.1	PREDICTED: glucose-6-phosphate translocase-like [Salmo salar]	100	XP_014018339.1	PREDICTED: glucose-6-phosphate translocase-like isoform X2 [Salmo salar]	248	ABV31710.1	transposase [Salmo salar]	235.728	ACI68348.1	40S ribosomal protein S25 [Salmo salar]
Hk_0001061	250	5.43339e-30	XP_014047293.1	PREDICTED: uncharacterized protein LOC106600457 [Salmo salar]	100	XP_013989248.1	PREDICTED: zinc finger protein 454-like [Salmo salar]	100	ACI67100.1	60S ribosomal protein L10 [Salmo salar]	174	ABV31710.1	transposase [Salmo salar]	124.79	XP_014047293.1	PREDICTED: uncharacterized protein LOC106600457 [Salmo salar]
Hk_0001062	584	9.3502e-33	XP_014039860.1	PREDICTED: uncharacterized protein LOC106593042 [Salmo salar]	100	XP_013989248.1	PREDICTED: zinc finger protein 454-like [Salmo salar]	100	ACI67100.1	60S ribosomal protein L10 [Salmo salar]	326	XP_014034265.1	PREDICTED: uncharacterized protein LOC106589099 [Salmo salar]	134.035	XP_014039860.1	PREDICTED: uncharacterized protein LOC106593042 [Salmo salar]
Hk_0001063	701	9.37911e-33	XP_014039860.1	PREDICTED: uncharacterized protein LOC106593042 [Salmo salar]	100	XP_013989248.1	PREDICTED: zinc finger protein 454-like [Salmo salar]	100	ACI67100.1	60S ribosomal protein L10 [Salmo salar]	326	XP_014034265.1	PREDICTED: uncharacterized protein LOC106589099 [Salmo salar]	134.035	XP_014039860.1	PREDICTED: uncharacterized protein LOC106593042 [Salmo salar]
Hk_0001064	687	9.38922e-33	XP_014039860.1	PREDICTED: uncharacterized protein LOC106593042 [Salmo salar]	100	XP_013989248.1	PREDICTED: zinc finger protein 454-like [Salmo salar]	100	ACI67100.1	60S ribosomal protein L10 [Salmo salar]	326	XP_014034265.1	PREDICTED: uncharacterized protein LOC106589099 [Salmo salar]	134.035	XP_014039860.1	PREDICTED: uncharacterized protein LOC106593042 [Salmo salar]
Hk_0001065	105	2.55085e-159	ABV31710.1	transposase [Salmo salar]	100	XP_013989830.1	PREDICTED: natterin-like protein isoform X1 [Salmo salar]	100	XP_013989830.1	PREDICTED: natterin-like protein isoform X1 [Salmo salar]	310	ABV31710.1	transposase [Salmo salar]	499.59	ABV31710.1	transposase [Salmo salar]
Hk_0001066	126	2.57576e-159	ABV31710.1	transposase [Salmo salar]	100	XP_013989830.1	PREDICTED: natterin-like protein isoform X1 [Salmo salar]	100	XP_013989830.1	PREDICTED: natterin-like protein isoform X1 [Salmo salar]	310	ABV31710.1	transposase [Salmo salar]	499.59	ABV31710.1	transposase [Salmo salar]
Hk_0001067	126	2.54215e-159	ABV31710.1	transposase [Salmo salar]	100	XP_013989830.1	PREDICTED: natterin-like protein isoform X1 [Salmo salar]	100	XP_013989830.1	PREDICTED: natterin-like protein isoform X1 [Salmo salar]	310	ABV31710.1	transposase [Salmo salar]	499.59	ABV31710.1	transposase [Salmo salar]
Hk_0001068	126	2.54334e-159	ABV31710.1	transposase [Salmo salar]	100	XP_013989830.1	PREDICTED: natterin-like protein isoform X1 [Salmo salar]	100	XP_013989830.1	PREDICTED: natterin-like protein isoform X1 [Salmo salar]	310	ABV31710.1	transposase [Salmo salar]	499.59	ABV31710.1	transposase [Salmo salar]
Hk_0001069	125	2.56785e-159	ABV31710.1	transposase [Salmo salar]	100	XP_013989830.1	PREDICTED: natterin-like protein isoform X1 [Salmo salar]	100	XP_013989830.1	PREDICTED: natterin-like protein isoform X1 [Salmo salar]	310	ABV31710.1	transposase [Salmo salar]	499.59	ABV31710.1	transposase [Salmo salar]
Hk_0001070	125	2.63072e-159	ABV31710.1	transposase [Salmo salar]	100	XP_013989830.1	PREDICTED: natterin-like protein isoform X1 [Salmo salar]	100	XP_013989830.1	PREDICTED: natterin-like protein isoform X1 [Salmo salar]	310	ABV31710.1	transposase [Salmo salar]	499.59	ABV31710.1	transposase [Salmo salar]
Hk_0001071	385	5.87084e-153	XP_013989970.1	PREDICTED: neurotensin receptor type 1-like [Salmo salar]	99.1453	XP_013989970.1	PREDICTED: neurotensin receptor type 1-like [Salmo salar]	99.5726	XP_013989970.1	PREDICTED: neurotensin receptor type 1-like [Salmo salar]	394	XP_014004695.1	PREDICTED: uncharacterized protein DDB_G0274171-like [Salmo salar]	484.567	XP_013989970.1	PREDICTED: neurotensin receptor type 1-like [Salmo salar]
Hk_0001072	316	1.18326e-110	XP_013990537.1	PREDICTED: death-inducer obliterator 1-like isoform X5 [Salmo salar]	100	XP_013990537.1	PREDICTED: death-inducer obliterator 1-like isoform X5 [Salmo salar]	100	XP_013990537.1	PREDICTED: death-inducer obliterator 1-like isoform X5 [Salmo salar]	353	XP_013990537.1	PREDICTED: death-inducer obliterator 1-like isoform X5 [Salmo salar]	402.519	XP_013990537.1	PREDICTED: death-inducer obliterator 1-like isoform X5 [Salmo salar]
Hk_0001073	316	0	XP_013991356.1	PREDICTED: zinc finger protein Eos-like isoform X1 [Salmo salar]	100	XP_013991356.1	PREDICTED: zinc finger protein Eos-like isoform X1 [Salmo salar]	100	XP_013991356.1	PREDICTED: zinc finger protein Eos-like isoform X1 [Salmo salar]	324	XP_013991356.1	PREDICTED: zinc finger protein Eos-like isoform X1 [Salmo salar]	579.711	XP_013991356.1	PREDICTED: zinc finger protein Eos-like isoform X1 [Salmo salar]
Hk_0001074	265	0	XP_013991356.1	PREDICTED: zinc finger protein Eos-like isoform X1 [Salmo salar]	100	ACN09875.1	40S ribosomal protein S26 [Salmo salar]	100	ACN09875.1	40S ribosomal protein S26 [Salmo salar]	324	XP_013991356.1	PREDICTED: zinc finger protein Eos-like isoform X1 [Salmo salar]	579.711	XP_013991356.1	PREDICTED: zinc finger protein Eos-like isoform X1 [Salmo salar]
Hk_0001075	287	1.53001e-78	ACN11475.1	Transposable element Tcb1 transposase [Salmo salar]	100	ACI67143.1	LETM1 domain-containing protein 1 [Salmo salar]	100	ACI67143.1	LETM1 domain-containing protein 1 [Salmo salar]	328	ABV31710.1	transposase [Salmo salar]	265.388	ACN11475.1	Transposable element Tcb1 transposase [Salmo salar]
Hk_0001076	287	1.52765e-78	ACN11475.1	Transposable element Tcb1 transposase [Salmo salar]	100	ACI67143.1	LETM1 domain-containing protein 1 [Salmo salar]	100	ACI67143.1	LETM1 domain-containing protein 1 [Salmo salar]	328	ABV31710.1	transposase [Salmo salar]	265.388	ACN11475.1	Transposable element Tcb1 transposase [Salmo salar]
Hk_0001077	445	4.52659e-114	ACN11074.1	Heat shock cognate 70 kDa protein [Salmo salar]	100	ACN11074.1	Heat shock cognate 70 kDa protein [Salmo salar]	100	ACN11074.1	Heat shock cognate 70 kDa protein [Salmo salar]	216	XP_014053065.1	PREDICTED: hypoxia up-regulated protein 1 [Salmo salar]	382.104	ACN11074.1	Heat shock cognate 70 kDa protein [Salmo salar]
Hk_0001078	466	1.14165e-128	ABV31711.1	transposase [Salmo salar]	100	ACN11074.1	Heat shock cognate 70 kDa protein [Salmo salar]	100	ACN11074.1	Heat shock cognate 70 kDa protein [Salmo salar]	216	XP_014053065.1	PREDICTED: hypoxia up-regulated protein 1 [Salmo salar]	382.104	ACN11074.1	Heat shock cognate 70 kDa protein [Salmo salar]
Hk_0001079	465	7.14947e-135	ABV31711.1	transposase [Salmo salar]	100	ACN11074.1	Heat shock cognate 70 kDa protein [Salmo salar]	100	ACN11074.1	Heat shock cognate 70 kDa protein [Salmo salar]	216	XP_014053065.1	PREDICTED: hypoxia up-regulated protein 1 [Salmo salar]	382.104	ACN11074.1	Heat shock cognate 70 kDa protein [Salmo salar]
Hk_0001080	465	1.41247e-134	ABV31711.1	transposase [Salmo salar]	100	ACN11074.1	Heat shock cognate 70 kDa protein [Salmo salar]	100	ACN11074.1	Heat shock cognate 70 kDa protein [Salmo salar]	216	XP_014053065.1	PREDICTED: hypoxia up-regulated protein 1 [Salmo salar]	382.104	ACN11074.1	Heat shock cognate 70 kDa protein [Salmo salar]
Hk_0001081	466	1.08383e-130	ABV31711.1	transposase [Salmo salar]	100	ACN11074.1	Heat shock cognate 70 kDa protein [Salmo salar]	100	ACN11074.1	Heat shock cognate 70 kDa protein [Salmo salar]	216	XP_014053065.1	PREDICTED: hypoxia up-regulated protein 1 [Salmo salar]	382.104	ACN11074.1	Heat shock cognate 70 kDa protein [Salmo salar]
Hk_0001082	568	6.25569e-114	ACN11074.1	Heat shock cognate 70 kDa protein [Salmo salar]	100	ACH70651.1	heat shock protein 8 [Salmo salar]	100	ACH70651.1	heat shock protein 8 [Salmo salar]	330	ABV31710.1	transposase [Salmo salar]	381.719	ACN11074.1	Heat shock cognate 70 kDa protein [Salmo salar]
Hk_0001083	1074	6.30259e-114	ACN11074.1	Heat shock cognate 70 kDa protein [Salmo salar]	100	ACH70651.1	heat shock protein 8 [Salmo salar]	100	ACH70651.1	heat shock protein 8 [Salmo salar]	330	ABV31710.1	transposase [Salmo salar]	381.719	ACN11074.1	Heat shock cognate 70 kDa protein [Salmo salar]
Hk_0001084	1074	6.30259e-114	ACN11074.1	Heat shock cognate 70 kDa protein [Salmo salar]	100	ACH70651.1	heat shock protein 8 [Salmo salar]	100	ACH70651.1	heat shock protein 8 [Salmo salar]	330	ABV31710.1	transposase [Salmo salar]	381.719	ACN11074.1	Heat shock cognate 70 kDa protein [Salmo salar]
Hk_0001085	1074	6.28526e-114	ACN11074.1	Heat shock cognate 70 kDa protein [Salmo salar]	100	ACH70651.1	heat shock protein 8 [Salmo salar]	100	ACH70651.1	heat shock protein 8 [Salmo salar]	330	ABV31710.1	transposase [Salmo salar]	381.719	ACN11074.1	Heat shock cognate 70 kDa protein [Salmo salar]
Hk_0001086	1091	6.33828e-114	ACN11074.1	Heat shock cognate 70 kDa protein [Salmo salar]	100	ACH70651.1	heat shock protein 8 [Salmo salar]	100	ACH70651.1	heat shock protein 8 [Salmo salar]	330	ABV31710.1	transposase [Salmo salar]	381.719	ACN11074.1	Heat shock cognate 70 kDa protein [Salmo salar]
Hk_0001087	1097	6.23427e-114	ACN11074.1	Heat shock cognate 70 kDa protein [Salmo salar]	100	ACH70651.1	heat shock protein 8 [Salmo salar]	100	ACH70651.1	heat shock protein 8 [Salmo salar]	330	ABV31710.1	transposase [Salmo salar]	381.719	ACN11074.1	Heat shock cognate 70 kDa protein [Salmo salar]
Hk_0001088	1165	6.24345e-114	ACN11074.1	Heat shock cognate 70 kDa protein [Salmo salar]	100	ACH70651.1	heat shock protein 8 [Salmo salar]	100	ACH70651.1	heat shock protein 8 [Salmo salar]	330	ABV31710.1	transposase [Salmo salar]	381.719	ACN11074.1	Heat shock cognate 70 kDa protein [Salmo salar]
Hk_0001089	1144	6.25569e-114	ACN11074.1	Heat shock cognate 70 kDa protein [Salmo salar]	100	ACH70651.1	heat shock protein 8 [Salmo salar]	100	ACH70651.1	heat shock protein 8 [Salmo salar]	330	ABV31710.1	transposase [Salmo salar]	381.719	ACN11074.1	Heat shock cognate 70 kDa protein [Salmo salar]
Hk_0001090	1269	6.28118e-114	ACN11074.1	Heat shock cognate 70 kDa protein [Salmo salar]	100	ACH70651.1	heat shock protein 8 [Salmo salar]	100	ACH70651.1	heat shock protein 8 [Salmo salar]	330	ABV31710.1	transposase [Salmo salar]	381.719	ACN11074.1	Heat shock cognate 70 kDa protein [Salmo salar]
Hk_0001091	1268	6.29851e-114	ACN11074.1	Heat shock cognate 70 kDa protein [Salmo salar]	100	ACH70651.1	heat shock protein 8 [Salmo salar]	100	ACH70651.1	heat shock protein 8 [Salmo salar]	330	ABV31710.1	transposase [Salmo salar]	381.719	ACN11074.1	Heat shock cognate 70 kDa protein [Salmo salar]
Hk_0001092	1255	6.31279e-114	ACN11074.1	Heat shock cognate 70 kDa protein [Salmo salar]	100	ACH70651.1	heat shock protein 8 [Salmo salar]	100	ACH70651.1	heat shock protein 8 [Salmo salar]	330	ABV31710.1	transposase [Salmo salar]	381.719	ACN11074.1	Heat shock cognate 70 kDa protein [Salmo salar]
Hk_0001093	1268	6.35969e-114	ACN11074.1	Heat shock cognate 70 kDa protein [Salmo salar]	100	ACH70651.1	heat shock protein 8 [Salmo salar]	100	ACH70651.1	heat shock protein 8 [Salmo salar]	330	ABV31710.1	transposase [Salmo salar]	381.719	ACN11074.1	Heat shock cognate 70 kDa protein [Salmo salar]
Hk_0001094	358	2.86744e-158	ACH85309.1	transposase-like [Salmo salar]	100	ACN09968.1	60S ribosomal protein L17 [Salmo salar]	100	ACN09968.1	60S ribosomal protein L17 [Salmo salar]	263	ACH85309.1	transposase-like [Salmo salar]	481.871	ACH85309.1	transposase-like [Salmo salar]
Hk_0001095	363	2.87792e-158	ACH85309.1	transposase-like [Salmo salar]	100	ACN09968.1	60S ribosomal protein L17 [Salmo salar]	100	ACN09968.1	60S ribosomal protein L17 [Salmo salar]	263	ACH85309.1	transposase-like [Salmo salar]	481.871	ACH85309.1	transposase-like [Salmo salar]
Hk_0001096	380	2.8705e-158	ACH85309.1	transposase-like [Salmo salar]	100	ACN09968.1	60S ribosomal protein L17 [Salmo salar]	100	ACN09968.1	60S ribosomal protein L17 [Salmo salar]	263	ACH85309.1	transposase-like [Salmo salar]	481.871	ACH85309.1	transposase-like [Salmo salar]
Hk_0001097	390	2.87618e-158	ACH85309.1	transposase-like [Salmo salar]	100	ACN09968.1	60S ribosomal protein L17 [Salmo salar]	100	ACN09968.1	60S ribosomal protein L17 [Salmo salar]	263	ACH85309.1	transposase-like [Salmo salar]	481.871	ACH85309.1	transposase-like [Salmo salar]
Hk_0001098	250	5.43339e-30	XP_014047293.1	PREDICTED: uncharacterized protein LOC106600457 [Salmo salar]	100	XP_013989248.1	PREDICTED: zinc finger protein 454-like [Salmo salar]	100	ACI67100.1	60S ribosomal protein L10 [Salmo salar]	174	ABV31710.1	transposase [Salmo salar]	124.79	XP_014047293.1	PREDICTED: uncharacterized protein LOC106600457 [Salmo salar]
Hk_0001099	584	9.34297e-33	XP_014039860.1	PREDICTED: uncharacterized protein LOC106593042 [Salmo salar]	100	XP_013989248.1	PREDICTED: zinc finger protein 454-like [Salmo salar]	100	ACI67100.1	60S ribosomal protein L10 [Salmo salar]	326	XP_014034265.1	PREDICTED: uncharacterized protein LOC106589099 [Salmo salar]	134.035	XP_014039860.1	PREDICTED: uncharacterized protein LOC106593042 [Salmo salar]
Hk_0001100	701	9.37911e-33	XP_014039860.1	PREDICTED: uncharacterized protein LOC106593042 [Salmo salar]	100	XP_013989248.1	PREDICTED: zinc finger protein 454-like [Salmo salar]	100	ACI67100.1	60S ribosomal protein L10 [Salmo salar]	326	XP_014034265.1	PREDICTED: uncharacterized protein LOC106589099 [Salmo salar]	134.035	XP_014039860.1	PREDICTED: uncharacterized protein LOC106593042 [Salmo salar]
Hk_0001101	689	9.39067e-33	XP_014039860.1	PREDICTED: uncharacterized protein LOC106593042 [Salmo salar]	100	XP_013989248.1	PREDICTED: zinc finger protein 454-like [Salmo salar]	100	ACI67100.1	60S ribosomal protein L10 [Salmo salar]	326	XP_014034265.1	PREDICTED: uncharacterized protein LOC106589099 [Salmo salar]	134.035	XP_014039860.1	PREDICTED: uncharacterized protein LOC106593042 [Salmo salar]
Hk_0001102	105	2.55164e-159	ABV31710.1	transposase [Salmo salar]	100	XP_013989830.1	PREDICTED: natterin-like protein isoform X1 [Salmo salar]	100	XP_013989830.1	PREDICTED: natterin-like protein isoform X1 [Salmo salar]	310	ABV31710.1	transposase [Salmo salar]	499.59	ABV31710.1	transposase [Salmo salar]
Hk_0001103	126	2.57576e-159	ABV31710.1	transposase [Salmo salar]	100	XP_013989830.1	PREDICTED: natterin-like protein isoform X1 [Salmo salar]	100	XP_013989830.1	PREDICTED: natterin-like protein isoform X1 [Salmo salar]	310	ABV31710.1	transposase [Salmo salar]	499.59	ABV31710.1	transposase [Salmo salar]
Hk_0001104	126	2.54215e-159	ABV31710.1	transposase [Salmo salar]	100	XP_013989830.1	PREDICTED: natterin-like protein isoform X1 [Salmo salar]	100	XP_013989830.1	PREDICTED: natterin-like protein isoform X1 [Salmo salar]	310	ABV31710.1	transposase [Salmo salar]	499.59	ABV31710.1	transposase [Salmo salar]
Hk_0001105	126	2.54373e-159	ABV31710.1	transposase [Salmo salar]	100	XP_013989830.1	PREDICTED: natterin-like protein isoform X1 [Salmo salar]	100	XP_013989830.1	PREDICTED: natterin-like protein isoform X1 [Salmo salar]	310	ABV31710.1	transposase [Salmo salar]	499.59	ABV31710.1	transposase [Salmo salar]
Hk_0001106	125	2.56825e-159	ABV31710.1	transposase [Salmo salar]	100	XP_013989830.1	PREDICTED: natterin-like protein isoform X1 [Salmo salar]	100	XP_013989830.1	PREDICTED: natterin-like protein isoform X1 [Salmo salar]	310	ABV31710.1	transposase [Salmo salar]	499.59	ABV31710.1	transposase [Salmo salar]
Hk_0001107	131	2.63704e-159	ABV31710.1	transposase [Salmo salar]	100	XP_013989830.1	PREDICTED: natterin-like protein isoform X1 [Salmo salar]	100	XP_013989830.1	PREDICTED: natterin-like protein isoform X1 [Salmo salar]	310	ABV31710.1	transposase [Salmo salar]	499.59	ABV31710.1	transposase [Salmo salar]
Hk_0001108	385	5.87728e-153	XP_013989970.1	PREDICTED: neurotensin receptor type 1-like [Salmo salar]	99.1453	XP_013989970.1	PREDICTED: neurotensin receptor type 1-like [Salmo salar]	99.5726	XP_013989970.1	PREDICTED: neurotensin receptor type 1-like [Salmo salar]	394	XP_014004695.1	PREDICTED: uncharacterized protein DDB_G0274171-like [Salmo salar]	484.567	XP_013989970.1	PREDICTED: neurotensin receptor type 1-like [Salmo salar]
Hk_0001109	316	1.18326e-110	XP_013990537.1	PREDICTED: death-inducer obliterator 1-like isoform X5 [Salmo salar]	100	XP_013990537.1	PREDICTED: death-inducer obliterator 1-like isoform X5 [Salmo salar]	100	XP_013990537.1	PREDICTED: death-inducer obliterator 1-like isoform X5 [Salmo salar]	353	XP_013990537.1	PREDICTED: death-inducer obliterator 1-like isoform X5 [Salmo salar]	402.519	XP_013990537.1	PREDICTED: death-inducer obliterator 1-like isoform X5 [Salmo salar]
Hk_0001110	316	0	XP_013991356.1	PREDICTED: zinc finger protein Eos-like isoform X1 [Salmo salar]	100	XP_013991356.1	PREDICTED: zinc finger protein Eos-like isoform X1 [Salmo salar]	100	XP_013991356.1	PREDICTED: zinc finger protein Eos-like isoform X1 [Salmo salar]	324	XP_013991356.1	PREDICTED: zinc finger protein Eos-like isoform X1 [Salmo salar]	579.711	XP_013991356.1	PREDICTED: zinc finger protein Eos-like isoform X1 [Salmo salar]
Hk_0001111	265	0	XP_013991356.1	PREDICTED: zinc finger protein Eos-like isoform X1 [Salmo salar]	100	ACN09875.1	40S ribosomal protein S26 [Salmo salar]	100	ACN09875.1	40S ribosomal protein S26 [Salmo salar]	324	XP_013991356.1	PREDICTED: zinc finger protein Eos-like isoform X1 [Salmo salar]	579.711	XP_013991356.1	PREDICTED: zinc finger protein Eos-like isoform X1 [Salmo salar]
Hk_0001112	287	1.53166e-78	ACN11475.1	Transposable element Tcb1 transposase [Salmo salar]	100	ACI67143.1	LETM1 domain-containing protein 1 [Salmo salar]	100	ACI67143.1	LETM1 domain-containing protein 1 [Salmo salar]	328	ABV31710.1	transposase [Salmo salar]	265.388	ACN11475.1	Transposable element Tcb1 transposase [Salmo salar]
Hk_0001113	451	4.52954e-114	ACN11074.1	Heat shock cognate 70 kDa protein [Salmo salar]	100	ACN11074.1	Heat shock cognate 70 kDa protein [Salmo salar]	100	ACN11074.1	Heat shock cognate 70 kDa protein [Salmo salar]	216	XP_014053065.1	PREDICTED: hypoxia up-regulated protein 1 [Salmo salar]	382.104	ACN11074.1	Heat shock cognate 70 kDa protein [Salmo salar]
Hk_0001114	466	1.14182e-128	ABV31711.1	transposase [Salmo salar]	100	ACN11074.1	Heat shock cognate 70 kDa protein [Salmo salar]	100	ACN11074.1	Heat shock cognate 70 kDa protein [Salmo salar]	216	XP_014053065.1	PREDICTED: hypoxia up-regulated protein 1 [Salmo salar]	382.104	ACN11074.1	Heat shock cognate 70 kDa protein [Salmo salar]
Hk_0001115	465	6.25115e-136	ABV31711.1	transposase [Salmo salar]	100	ACN11074.1	Heat shock cognate 70 kDa protein [Salmo salar]	100	ACN11074.1	Heat shock cognate 70 kDa protein [Salmo salar]	216	XP_014053065.1	PREDICTED: hypoxia up-regulated protein 1 [Salmo salar]	382.104	ACN11074.1	Heat shock cognate 70 kDa protein [Salmo salar]
Hk_0001116	466	1.0853e-130	ABV31711.1	transposase [Salmo salar]	100	ACN11074.1	Heat shock cognate 70 kDa protein [Salmo salar]	100	ACN11074.1	Heat shock cognate 70 kDa protein [Salmo salar]	216	XP_014053065.1	PREDICTED: hypoxia up-regulated protein 1 [Salmo salar]	382.104	ACN11074.1	Heat shock cognate 70 kDa protein [Salmo salar]
Hk_0001117	568	6.25365e-114	ACN11074.1	Heat shock cognate 70 kDa protein [Salmo salar]	100	ACH70651.1	heat shock protein 8 [Salmo salar]	100	ACH70651.1	heat shock protein 8 [Salmo salar]	330	ABV31710.1	transposase [Salmo salar]	381.719	ACN11074.1	Heat shock cognate 70 kDa protein [Salmo salar]
Hk_0001118	1074	6.30055e-114	ACN11074.1	Heat shock cognate 70 kDa protein [Salmo salar]	100	ACH70651.1	heat shock protein 8 [Salmo salar]	100	ACH70651.1	heat shock protein 8 [Salmo salar]	330	ABV31710.1	transposase [Salmo salar]	381.719	ACN11074.1	Heat shock cognate 70 kDa protein [Salmo salar]
Hk_0001119	1074	6.29953e-114	ACN11074.1	Heat shock cognate 70 kDa protein [Salmo salar]	100	ACH70651.1	heat shock protein 8 [Salmo salar]	100	ACH70651.1	heat shock protein 8 [Salmo salar]	330	ABV31710.1	transposase [Salmo salar]	381.719	ACN11074.1	Heat shock cognate 70 kDa protein [Salmo salar]
Hk_0001120	1074	6.28526e-114	ACN11074.1	Heat shock cognate 70 kDa protein [Salmo salar]	100	ACH70651.1	heat shock protein 8 [Salmo salar]	100	ACH70651.1	heat shock protein 8 [Salmo salar]	330	ABV31710.1	transposase [Salmo salar]	381.719	ACN11074.1	Heat shock cognate 70 kDa protein [Salmo salar]
Hk_0001121	1096	6.34134e-114	ACN11074.1	Heat shock cognate 70 kDa protein [Salmo salar]	100	ACH70651.1	heat shock protein 8 [Salmo salar]	100	ACH70651.1	heat shock protein 8 [Salmo salar]	330	ABV31710.1	transposase [Salmo salar]	381.719	ACN11074.1	Heat shock cognate 70 kDa protein [Salmo salar]
Hk_0001122	1152	6.27098e-114	ACN11074.1	Heat shock cognate 70 kDa protein [Salmo salar]	100	ACH70651.1	heat shock protein 8 [Salmo salar]	100	ACH70651.1	heat shock protein 8 [Salmo salar]	330	ABV31710.1	transposase [Salmo salar]	381.719	ACN11074.1	Heat shock cognate 70 kDa protein [Salmo salar]
Hk_0001123	1261	6.2822e-114	ACN11074.1	Heat shock cognate 70 kDa protein [Salmo salar]	100	ACH70651.1	heat shock protein 8 [Salmo salar]	100	ACH70651.1	heat shock protein 8 [Salmo salar]	330	ABV31710.1	transposase [Salmo salar]	381.719	ACN11074.1	Heat shock cognate 70 kDa protein [Salmo salar]
Hk_0001124	1268	6.29953e-114	ACN11074.1	Heat shock cognate 70 kDa protein [Salmo salar]	100	ACH70651.1	heat shock protein 8 [Salmo salar]	100	ACH70651.1	heat shock protein 8 [Salmo salar]	330	ABV31710.1	transposase [Salmo salar]	381.719	ACN11074.1	Heat shock cognate 70 kDa protein [Salmo salar]
Hk_0001125	1255	6.31279e-114	ACN11074.1	Heat shock cognate 70 kDa protein [Salmo salar]	100	ACH70651.1	heat shock protein 8 [Salmo salar]	100	ACH70651.1	heat shock protein 8 [Salmo salar]	330	ABV31710.1	transposase [Salmo salar]	381.719	ACN11074.1	Heat shock cognate 70 kDa protein [Salmo salar]
Hk_0001126	1268	6.36071e-114	ACN11074.1	Heat shock cognate 70 kDa protein [Salmo salar]	100	ACH70651.1	heat shock protein 8 [Salmo salar]	100	ACH70651.1	heat shock protein 8 [Salmo salar]	330	ABV31710.1	transposase [Salmo salar]	381.719	ACN11074.1	Heat shock cognate 70 kDa protein [Salmo salar]
Hk_0001127	358	2.86744e-158	ACH85309.1	transposase-like [Salmo salar]	100	ACN09968.1	60S ribosomal protein L17 [Salmo salar]	100	ACN09968.1	60S ribosomal protein L17 [Salmo salar]	263	ACH85309.1	transposase-like [Salmo salar]	481.871	ACH85309.1	transposase-like [Salmo salar]
Hk_0001128	363	2.87792e-158	ACH85309.1	transposase-like [Salmo salar]	100	ACN09968.1	60S ribosomal protein L17 [Salmo salar]	100	ACN09968.1	60S ribosomal protein L17 [Salmo salar]	263	ACH85309.1	transposase-like [Salmo salar]	481.871	ACH85309.1	transposase-like [Salmo salar]
Hk_0001129	380	2.8705e-158	ACH85309.1	transposase-like [Salmo salar]	100	ACN09968.1	60S ribosomal protein L17 [Salmo salar]	100	ACN09968.1	60S ribosomal protein L17 [Salmo salar]	263	ACH85309.1	transposase-like [Salmo salar]	481.871	ACH85309.1	transposase-like [Salmo salar]
Hk_0001130	390	2.87749e-158	ACH85309.1	transposase-like [Salmo salar]	100	ACN09968.1	60S ribosomal protein L17 [Salmo salar]	100	ACN09968.1	60S ribosomal protein L17 [Salmo salar]	263	ACH85309.1	transposase-like [Salmo salar]	481.871	ACH85309.1	transposase-like [Salmo salar]
Hk_0001131	388	2.86132e-158	ACH85309.1	transposase-like [Salmo salar]	100	ACN09968.1	60S ribosomal protein L17 [Salmo salar]	100	ACN09968.1	60S ribosomal protein L17 [Salmo salar]	263	ACH85309.1	transposase-like [Salmo salar]	481.871	ACH85309.1	transposase-like [Salmo salar]
Hk_0000693	671	8.46643e-49	AKP40998.1	ORF2 protein [Salmo salar]	100	ACN11199.1	40S ribosomal protein S12 [Salmo salar]	100	ACN11199.1	40S ribosomal protein S12 [Salmo salar]	498	XP_013989608.1	PREDICTED: uncharacterized protein PFB0145c-like [Salmo salar]	196.052	AKP40998.1	ORF2 protein [Salmo salar]
Hk_0000694	1096	8.46209e-49	AKP40998.1	ORF2 protein [Salmo salar]	100	ACN11199.1	40S ribosomal protein S12 [Salmo salar]	100	ACN11199.1	40S ribosomal protein S12 [Salmo salar]	498	XP_013989608.1	PREDICTED: uncharacterized protein PFB0145c-like [Salmo salar]	196.052	AKP40998.1	ORF2 protein [Salmo salar]
Hk_0000695	1047	8.47364e-49	AKP40998.1	ORF2 protein [Salmo salar]	100	ACN11199.1	40S ribosomal protein S12 [Salmo salar]	100	ACN11199.1	40S ribosomal protein S12 [Salmo salar]	498	XP_013989608.1	PREDICTED: uncharacterized protein PFB0145c-like [Salmo salar]	196.052	AKP40998.1	ORF2 protein [Salmo salar]
Hk_0000696	313	0	XP_013999487.1	PREDICTED: adenosine 3'-phospho 5'-phosphosulfate transporter 1 isoform X2 [Salmo salar]	100	XP_013999487.1	PREDICTED: adenosine 3'-phospho 5'-phosphosulfate transporter 1 isoform X2 [Salmo salar]	100	XP_013999487.1	PREDICTED: adenosine 3'-phospho 5'-phosphosulfate transporter 1 isoform X2 [Salmo salar]	291	XP_013999487.1	PREDICTED: adenosine 3'-phospho 5'-phosphosulfate transporter 1 isoform X2 [Salmo salar]	596.275	XP_013999487.1	PREDICTED: adenosine 3'-phospho 5'-phosphosulfate transporter 1 isoform X2 [Salmo salar]
Hk_0000697	313	0	XP_013999487.1	PREDICTED: adenosine 3'-phospho 5'-phosphosulfate transporter 1 isoform X2 [Salmo salar]	100	XP_013999487.1	PREDICTED: adenosine 3'-phospho 5'-phosphosulfate transporter 1 isoform X2 [Salmo salar]	100	XP_013999487.1	PREDICTED: adenosine 3'-phospho 5'-phosphosulfate transporter 1 isoform X2 [Salmo salar]	285	XP_013999487.1	PREDICTED: adenosine 3'-phospho 5'-phosphosulfate transporter 1 isoform X2 [Salmo salar]	582.793	XP_013999487.1	PREDICTED: adenosine 3'-phospho 5'-phosphosulfate transporter 1 isoform X2 [Salmo salar]
Hk_0000698	318	6.23707e-167	XP_013999487.1	PREDICTED: adenosine 3'-phospho 5'-phosphosulfate transporter 1 isoform X2 [Salmo salar]	100	XP_013999487.1	PREDICTED: adenosine 3'-phospho 5'-phosphosulfate transporter 1 isoform X2 [Salmo salar]	100	XP_013999487.1	PREDICTED: adenosine 3'-phospho 5'-phosphosulfate transporter 1 isoform X2 [Salmo salar]	276	ACH85309.1	transposase-like [Salmo salar]	526.168	XP_013999487.1	PREDICTED: adenosine 3'-phospho 5'-phosphosulfate transporter 1 isoform X2 [Salmo salar]
Hk_0000699	318	2.71791e-152	XP_013999487.1	PREDICTED: adenosine 3'-phospho 5'-phosphosulfate transporter 1 isoform X2 [Salmo salar]	100	XP_013999487.1	PREDICTED: adenosine 3'-phospho 5'-phosphosulfate transporter 1 isoform X2 [Salmo salar]	100	XP_013999487.1	PREDICTED: adenosine 3'-phospho 5'-phosphosulfate transporter 1 isoform X2 [Salmo salar]	276	ACH85309.1	transposase-like [Salmo salar]	484.182	XP_013999487.1	PREDICTED: adenosine 3'-phospho 5'-phosphosulfate transporter 1 isoform X2 [Salmo salar]
Hk_0000700	318	4.79304e-149	XP_013999487.1	PREDICTED: adenosine 3'-phospho 5'-phosphosulfate transporter 1 isoform X2 [Salmo salar]	100	XP_013999487.1	PREDICTED: adenosine 3'-phospho 5'-phosphosulfate transporter 1 isoform X2 [Salmo salar]	100	XP_013999487.1	PREDICTED: adenosine 3'-phospho 5'-phosphosulfate transporter 1 isoform X2 [Salmo salar]	276	ACH85309.1	transposase-like [Salmo salar]	474.552	XP_013999487.1	PREDICTED: adenosine 3'-phospho 5'-phosphosulfate transporter 1 isoform X2 [Salmo salar]
Hk_0000701	318	2.89903e-143	XP_013999488.1	PREDICTED: adenosine 3'-phospho 5'-phosphosulfate transporter 1 isoform X3 [Salmo salar]	100	XP_013999488.1	PREDICTED: adenosine 3'-phospho 5'-phosphosulfate transporter 1 isoform X3 [Salmo salar]	100	XP_013999488.1	PREDICTED: adenosine 3'-phospho 5'-phosphosulfate transporter 1 isoform X3 [Salmo salar]	276	ACH85309.1	transposase-like [Salmo salar]	457.988	XP_013999488.1	PREDICTED: adenosine 3'-phospho 5'-phosphosulfate transporter 1 isoform X3 [Salmo salar]
Hk_0000702	316	2.06273e-140	XP_013999488.1	PREDICTED: adenosine 3'-phospho 5'-phosphosulfate transporter 1 isoform X3 [Salmo salar]	100	XP_013999488.1	PREDICTED: adenosine 3'-phospho 5'-phosphosulfate transporter 1 isoform X3 [Salmo salar]	100	XP_013999488.1	PREDICTED: adenosine 3'-phospho 5'-phosphosulfate transporter 1 isoform X3 [Salmo salar]	276	ACH85309.1	transposase-like [Salmo salar]	449.514	XP_013999488.1	PREDICTED: adenosine 3'-phospho 5'-phosphosulfate transporter 1 isoform X3 [Salmo salar]
Hk_0000703	323	8.67339e-94	XP_013999488.1	PREDICTED: adenosine 3'-phospho 5'-phosphosulfate transporter 1 isoform X3 [Salmo salar]	100	XP_013999488.1	PREDICTED: adenosine 3'-phospho 5'-phosphosulfate transporter 1 isoform X3 [Salmo salar]	100	XP_013999488.1	PREDICTED: adenosine 3'-phospho 5'-phosphosulfate transporter 1 isoform X3 [Salmo salar]	276	ACH85309.1	transposase-like [Salmo salar]	315.464	XP_013999488.1	PREDICTED: adenosine 3'-phospho 5'-phosphosulfate transporter 1 isoform X3 [Salmo salar]
Hk_0000704	324	5.40145e-80	AAD30275.1	heat shock protein hsp90 beta [Salmo salar]	100	AAD30275.1	heat shock protein hsp90 beta [Salmo salar]	100	AAD30275.1	heat shock protein hsp90 beta [Salmo salar]	276	ACH85309.1	transposase-like [Salmo salar]	251.136	XP_013999487.1	PREDICTED: adenosine 3'-phospho 5'-phosphosulfate transporter 1 isoform X2 [Salmo salar]
Hk_0000705	313	5.40063e-80	AAD30275.1	heat shock protein hsp90 beta [Salmo salar]	100	AAD30275.1	heat shock protein hsp90 beta [Salmo salar]	100	AAD30275.1	heat shock protein hsp90 beta [Salmo salar]	276	ACH85309.1	transposase-like [Salmo salar]	240.35	AAD30275.1	heat shock protein hsp90 beta [Salmo salar]
Hk_0000706	313	5.36955e-80	AAD30275.1	heat shock protein hsp90 beta [Salmo salar]	100	AAD30275.1	heat shock protein hsp90 beta [Salmo salar]	100	AAD30275.1	heat shock protein hsp90 beta [Salmo salar]	276	ACH85309.1	transposase-like [Salmo salar]	240.35	AAD30275.1	heat shock protein hsp90 beta [Salmo salar]
Hk_0000707	313	5.37118e-80	AAD30275.1	heat shock protein hsp90 beta [Salmo salar]	100	AAD30275.1	heat shock protein hsp90 beta [Salmo salar]	100	AAD30275.1	heat shock protein hsp90 beta [Salmo salar]	276	ACH85309.1	transposase-like [Salmo salar]	240.35	AAD30275.1	heat shock protein hsp90 beta [Salmo salar]
Hk_0000708	313	5.37773e-80	AAD30275.1	heat shock protein hsp90 beta [Salmo salar]	100	AAD30275.1	heat shock protein hsp90 beta [Salmo salar]	100	AAD30275.1	heat shock protein hsp90 beta [Salmo salar]	276	ACH85309.1	transposase-like [Salmo salar]	240.35	AAD30275.1	heat shock protein hsp90 beta [Salmo salar]
Hk_0000709	213	4.02102e-126	ABV31711.1	transposase [Salmo salar]	100	ACI70134.1	Ribonuclease H1 [Salmo salar]	100	ACI70134.1	Ribonuclease H1 [Salmo salar]	178	ABV31711.1	transposase [Salmo salar]	321.627	ABV31711.1	transposase [Salmo salar]
Hk_0000710	213	1.24622e-97	ABV31711.1	transposase [Salmo salar]	100	ACI70134.1	Ribonuclease H1 [Salmo salar]	100	ACI70134.1	Ribonuclease H1 [Salmo salar]	178	ABV31711.1	transposase [Salmo salar]	321.627	ABV31711.1	transposase [Salmo salar]
Hk_0000711	215	1.25144e-97	ABV31711.1	transposase [Salmo salar]	100	ACI70134.1	Ribonuclease H1 [Salmo salar]	100	ACI70134.1	Ribonuclease H1 [Salmo salar]	178	ABV31711.1	transposase [Salmo salar]	321.627	ABV31711.1	transposase [Salmo salar]
Hk_0000712	221	4.01858e-126	ABV31711.1	transposase [Salmo salar]	100	XP_014000389.1	PREDICTED: probable allantoicase [Salmo salar]	100	XP_014000389.1	PREDICTED: probable allantoicase [Salmo salar]	178	ABV31711.1	transposase [Salmo salar]	321.627	ABV31711.1	transposase [Salmo salar]
Hk_0000713	221	1.25105e-97	ABV31711.1	transposase [Salmo salar]	100	XP_014000389.1	PREDICTED: probable allantoicase [Salmo salar]	100	XP_014000389.1	PREDICTED: probable allantoicase [Salmo salar]	178	ABV31711.1	transposase [Salmo salar]	321.627	ABV31711.1	transposase [Salmo salar]
Hk_0000714	492	6.04292e-76	ACI68988.1	Transposable element Tc1 transposase [Salmo salar]	100	XP_014000280.1	PREDICTED: pre-mRNA-processing factor 39 isoform X2 [Salmo salar]	100	XP_014000280.1	PREDICTED: pre-mRNA-processing factor 39 isoform X2 [Salmo salar]	294	ABV31711.1	transposase [Salmo salar]	232.646	XP_014000279.1	PREDICTED: pre-mRNA-processing factor 39 isoform X1 [Salmo salar]
Hk_0000715	498	6.05846e-76	ACI68988.1	Transposable element Tc1 transposase [Salmo salar]	100	XP_014000280.1	PREDICTED: pre-mRNA-processing factor 39 isoform X2 [Salmo salar]	100	XP_014000280.1	PREDICTED: pre-mRNA-processing factor 39 isoform X2 [Salmo salar]	294	ABV31711.1	transposase [Salmo salar]	232.646	XP_014000279.1	PREDICTED: pre-mRNA-processing factor 39 isoform X1 [Salmo salar]
Hk_0000716	158	3.41173e-153	ACX35599.1	reverse transcriptase-like protein [Salmo salar]	100	ACI69805.1	60S ribosomal protein L32 [Salmo salar]	100	XP_013989550.1	PREDICTED: 60S ribosomal protein L32-like [Salmo salar]	377	AKP40998.1	ORF2 protein [Salmo salar]	488.419	XP_014056412.1	PREDICTED: uncharacterized protein LOC106605384, partial [Salmo salar]
Hk_0000717	157	3.42389e-153	ACX35599.1	reverse transcriptase-like protein [Salmo salar]	100	ACI69805.1	60S ribosomal protein L32 [Salmo salar]	100	XP_013989550.1	PREDICTED: 60S ribosomal protein L32-like [Salmo salar]	377	AKP40998.1	ORF2 protein [Salmo salar]	488.419	XP_014056412.1	PREDICTED: uncharacterized protein LOC106605384, partial [Salmo salar]
Hk_0000718	427	1.21688e-125	XP_014001007.1	PREDICTED: nascent polypeptide-associated complex subunit alpha, muscle-specific form-like isoform X2 [Salmo salar]	100	XP_014001007.1	PREDICTED: nascent polypeptide-associated complex subunit alpha, muscle-specific form-like isoform X2 [Salmo salar]	100	XP_014001007.1	PREDICTED: nascent polypeptide-associated complex subunit alpha, muscle-specific form-like isoform X2 [Salmo salar]	299	XP_014037854.1	PREDICTED: uncharacterized protein LOC106591180 isoform X1 [Salmo salar]	407.912	XP_014001007.1	PREDICTED: nascent polypeptide-associated complex subunit alpha, muscle-specific form-like isoform X2 [Salmo salar]
Hk_0000719	427	1.21381e-125	XP_014001007.1	PREDICTED: nascent polypeptide-associated complex subunit alpha, muscle-specific form-like isoform X2 [Salmo salar]	100	XP_014001007.1	PREDICTED: nascent polypeptide-associated complex subunit alpha, muscle-specific form-like isoform X2 [Salmo salar]	100	XP_014001007.1	PREDICTED: nascent polypeptide-associated complex subunit alpha, muscle-specific form-like isoform X2 [Salmo salar]	299	XP_014037854.1	PREDICTED: uncharacterized protein LOC106591180 isoform X1 [Salmo salar]	407.912	XP_014001007.1	PREDICTED: nascent polypeptide-associated complex subunit alpha, muscle-specific form-like isoform X2 [Salmo salar]
Hk_0000720	427	1.21266e-125	XP_014001007.1	PREDICTED: nascent polypeptide-associated complex subunit alpha, muscle-specific form-like isoform X2 [Salmo salar]	100	XP_014001007.1	PREDICTED: nascent polypeptide-associated complex subunit alpha, muscle-specific form-like isoform X2 [Salmo salar]	100	XP_014001007.1	PREDICTED: nascent polypeptide-associated complex subunit alpha, muscle-specific form-like isoform X2 [Salmo salar]	299	XP_014037854.1	PREDICTED: uncharacterized protein LOC106591180 isoform X1 [Salmo salar]	407.912	XP_014001007.1	PREDICTED: nascent polypeptide-associated complex subunit alpha, muscle-specific form-like isoform X2 [Salmo salar]
Hk_0000721	313	9.07277e-40	ABV31710.1	transposase [Salmo salar]	100	XP_014001824.1	PREDICTED: somatostatin-2-like [Salmo salar]	100	XP_014001824.1	PREDICTED: somatostatin-2-like [Salmo salar]	266	ABV31710.1	transposase [Salmo salar]	147.517	ACM09793.1	Transposable element Tc1 transposase [Salmo salar]
Hk_0000722	313	9.07965e-40	ABV31710.1	transposase [Salmo salar]	100	XP_014001824.1	PREDICTED: somatostatin-2-like [Salmo salar]	100	XP_014001824.1	PREDICTED: somatostatin-2-like [Salmo salar]	266	ABV31710.1	transposase [Salmo salar]	147.517	ACM09793.1	Transposable element Tc1 transposase [Salmo salar]
Hk_0000723	313	9.10442e-40	ABV31710.1	transposase [Salmo salar]	100	XP_014001824.1	PREDICTED: somatostatin-2-like [Salmo salar]	100	XP_014001824.1	PREDICTED: somatostatin-2-like [Salmo salar]	266	ABV31710.1	transposase [Salmo salar]	147.517	ACM09793.1	Transposable element Tc1 transposase [Salmo salar]
Hk_0000724	313	9.08928e-40	ABV31710.1	transposase [Salmo salar]	100	XP_014001824.1	PREDICTED: somatostatin-2-like [Salmo salar]	100	XP_014001824.1	PREDICTED: somatostatin-2-like [Salmo salar]	266	ABV31710.1	transposase [Salmo salar]	147.517	ACM09793.1	Transposable element Tc1 transposase [Salmo salar]
Hk_0000725	144	2.71623e-89	ACI68988.1	Transposable element Tc1 transposase [Salmo salar]	100	XP_014002540.1	PREDICTED: uncharacterized protein LOC106572680 [Salmo salar]	100	XP_014002514.1	PREDICTED: extended synaptotagmin-1-like [Salmo salar]	267	ABV31710.1	transposase [Salmo salar]	245.743	XP_014002514.1	PREDICTED: extended synaptotagmin-1-like [Salmo salar]
Hk_0000726	144	1.65387e-74	XP_014017894.1	PREDICTED: uncharacterized protein LOC106580886, partial [Salmo salar]	100	XP_014002540.1	PREDICTED: uncharacterized protein LOC106572680 [Salmo salar]	100	XP_014002514.1	PREDICTED: extended synaptotagmin-1-like [Salmo salar]	267	ABV31710.1	transposase [Salmo salar]	245.743	XP_014002514.1	PREDICTED: extended synaptotagmin-1-like [Salmo salar]
Hk_0000727	144	2.7121e-89	ACI68988.1	Transposable element Tc1 transposase [Salmo salar]	100	XP_014002540.1	PREDICTED: uncharacterized protein LOC106572680 [Salmo salar]	100	XP_014002514.1	PREDICTED: extended synaptotagmin-1-like [Salmo salar]	267	ABV31710.1	transposase [Salmo salar]	245.743	XP_014002514.1	PREDICTED: extended synaptotagmin-1-like [Salmo salar]
Hk_0000728	144	1.65714e-74	XP_014017894.1	PREDICTED: uncharacterized protein LOC106580886, partial [Salmo salar]	100	XP_014002540.1	PREDICTED: uncharacterized protein LOC106572680 [Salmo salar]	100	XP_014002514.1	PREDICTED: extended synaptotagmin-1-like [Salmo salar]	267	ABV31710.1	transposase [Salmo salar]	245.743	XP_014002514.1	PREDICTED: extended synaptotagmin-1-like [Salmo salar]
Hk_0000729	575	8.59126e-142	XP_014002864.1	PREDICTED: zinc finger protein 335-like isoform X3 [Salmo salar]	100	XP_014002864.1	PREDICTED: zinc finger protein 335-like isoform X3 [Salmo salar]	100	XP_014002864.1	PREDICTED: zinc finger protein 335-like isoform X3 [Salmo salar]	419	XP_013989860.1	PREDICTED: zinc finger protein 335-like isoform X5 [Salmo salar]	493.812	XP_014002861.1	PREDICTED: zinc finger protein 335-like isoform X1 [Salmo salar]
Hk_0000730	575	8.59295e-142	XP_014002864.1	PREDICTED: zinc finger protein 335-like isoform X3 [Salmo salar]	100	XP_014002864.1	PREDICTED: zinc finger protein 335-like isoform X3 [Salmo salar]	100	XP_014002864.1	PREDICTED: zinc finger protein 335-like isoform X3 [Salmo salar]	419	XP_013989860.1	PREDICTED: zinc finger protein 335-like isoform X5 [Salmo salar]	493.812	XP_014002861.1	PREDICTED: zinc finger protein 335-like isoform X1 [Salmo salar]
Hk_0000731	202	6.81999e-38	AKP40998.1	ORF2 protein [Salmo salar]	100	ACN09940.1	40S ribosomal protein S21 [Salmo salar]	100	ACN09940.1	40S ribosomal protein S21 [Salmo salar]	266	XP_013998309.1	PREDICTED: uncharacterized protein LOC106570465 isoform X1 [Salmo salar]	88.1965	AKP41002.1	zinc finger protein 180-like protein isoform X2 [Salmo salar]
Hk_0000732	815	1.17917e-54	XP_014045510.1	PREDICTED: transketolase-like protein 1 [Salmo salar]	100	XP_014045510.1	PREDICTED: transketolase-like protein 1 [Salmo salar]	100	XP_014045510.1	PREDICTED: transketolase-like protein 1 [Salmo salar]	328	XP_014042557.1	PREDICTED: proteoglycan 4-like [Salmo salar]	194.126	XP_014045510.1	PREDICTED: transketolase-like protein 1 [Salmo salar]
Hk_0000733	1218	1.18423e-54	XP_014045510.1	PREDICTED: transketolase-like protein 1 [Salmo salar]	100	XP_014045510.1	PREDICTED: transketolase-like protein 1 [Salmo salar]	100	XP_014045510.1	PREDICTED: transketolase-like protein 1 [Salmo salar]	328	XP_014042557.1	PREDICTED: proteoglycan 4-like [Salmo salar]	194.126	XP_014045510.1	PREDICTED: transketolase-like protein 1 [Salmo salar]
Hk_0000734	1223	1.1864e-54	XP_014045510.1	PREDICTED: transketolase-like protein 1 [Salmo salar]	100	XP_014045510.1	PREDICTED: transketolase-like protein 1 [Salmo salar]	100	XP_014045510.1	PREDICTED: transketolase-like protein 1 [Salmo salar]	328	XP_014042557.1	PREDICTED: proteoglycan 4-like [Salmo salar]	194.126	XP_014045510.1	PREDICTED: transketolase-like protein 1 [Salmo salar]
Hk_0000735	675	8.47509e-49	AKP40998.1	ORF2 protein [Salmo salar]	100	ACN11199.1	40S ribosomal protein S12 [Salmo salar]	100	ACN11199.1	40S ribosomal protein S12 [Salmo salar]	498	XP_013989608.1	PREDICTED: uncharacterized protein PFB0145c-like [Salmo salar]	196.052	AKP40998.1	ORF2 protein [Salmo salar]
Hk_0000736	1097	8.46498e-49	AKP40998.1	ORF2 protein [Salmo salar]	100	ACN11199.1	40S ribosomal protein S12 [Salmo salar]	100	ACN11199.1	40S ribosomal protein S12 [Salmo salar]	498	XP_013989608.1	PREDICTED: uncharacterized protein PFB0145c-like [Salmo salar]	196.052	AKP40998.1	ORF2 protein [Salmo salar]
Hk_0000737	1052	8.47653e-49	AKP40998.1	ORF2 protein [Salmo salar]	100	ACN11199.1	40S ribosomal protein S12 [Salmo salar]	100	ACN11199.1	40S ribosomal protein S12 [Salmo salar]	498	XP_013989608.1	PREDICTED: uncharacterized protein PFB0145c-like [Salmo salar]	196.052	AKP40998.1	ORF2 protein [Salmo salar]
Hk_0000738	313	0	XP_013999487.1	PREDICTED: adenosine 3'-phospho 5'-phosphosulfate transporter 1 isoform X2 [Salmo salar]	100	XP_013999487.1	PREDICTED: adenosine 3'-phospho 5'-phosphosulfate transporter 1 isoform X2 [Salmo salar]	100	XP_013999487.1	PREDICTED: adenosine 3'-phospho 5'-phosphosulfate transporter 1 isoform X2 [Salmo salar]	312	XP_013999487.1	PREDICTED: adenosine 3'-phospho 5'-phosphosulfate transporter 1 isoform X2 [Salmo salar]	639.417	XP_013999487.1	PREDICTED: adenosine 3'-phospho 5'-phosphosulfate transporter 1 isoform X2 [Salmo salar]
Hk_0000739	319	0	XP_013999487.1	PREDICTED: adenosine 3'-phospho 5'-phosphosulfate transporter 1 isoform X2 [Salmo salar]	100	XP_013999487.1	PREDICTED: adenosine 3'-phospho 5'-phosphosulfate transporter 1 isoform X2 [Salmo salar]	100	XP_013999487.1	PREDICTED: adenosine 3'-phospho 5'-phosphosulfate transporter 1 isoform X2 [Salmo salar]	298	XP_013999487.1	PREDICTED: adenosine 3'-phospho 5'-phosphosulfate transporter 1 isoform X2 [Salmo salar]	610.912	XP_013999487.1	PREDICTED: adenosine 3'-phospho 5'-phosphosulfate transporter 1 isoform X2 [Salmo salar]
Hk_0000740	321	1.73902e-95	XP_013999488.1	PREDICTED: adenosine 3'-phospho 5'-phosphosulfate transporter 1 isoform X3 [Salmo salar]	100	XP_013999488.1	PREDICTED: adenosine 3'-phospho 5'-phosphosulfate transporter 1 isoform X3 [Salmo salar]	100	XP_013999488.1	PREDICTED: adenosine 3'-phospho 5'-phosphosulfate transporter 1 isoform X3 [Salmo salar]	276	ACH85309.1	transposase-like [Salmo salar]	320.472	XP_013999488.1	PREDICTED: adenosine 3'-phospho 5'-phosphosulfate transporter 1 isoform X3 [Salmo salar]
Hk_0000741	324	5.41536e-80	AAD30275.1	heat shock protein hsp90 beta [Salmo salar]	100	AAD30275.1	heat shock protein hsp90 beta [Salmo salar]	100	AAD30275.1	heat shock protein hsp90 beta [Salmo salar]	276	ACH85309.1	transposase-like [Salmo salar]	257.299	XP_013999487.1	PREDICTED: adenosine 3'-phospho 5'-phosphosulfate transporter 1 isoform X2 [Salmo salar]
Hk_0000742	313	5.41699e-80	AAD30275.1	heat shock protein hsp90 beta [Salmo salar]	100	AAD30275.1	heat shock protein hsp90 beta [Salmo salar]	100	AAD30275.1	heat shock protein hsp90 beta [Salmo salar]	276	ACH85309.1	transposase-like [Salmo salar]	240.35	AAD30275.1	heat shock protein hsp90 beta [Salmo salar]
Hk_0000743	324	1.37595e-80	AGT57170.1	heat shock protein 90-beta 2 [Salmo salar]	100	AGT57170.1	heat shock protein 90-beta 2 [Salmo salar]	100	AGT57170.1	heat shock protein 90-beta 2 [Salmo salar]	276	ACH85309.1	transposase-like [Salmo salar]	240.35	AAD30275.1	heat shock protein hsp90 beta [Salmo salar]
Hk_0000744	322	1.37595e-80	AGT57170.1	heat shock protein 90-beta 2 [Salmo salar]	100	AGT57170.1	heat shock protein 90-beta 2 [Salmo salar]	100	AGT57170.1	heat shock protein 90-beta 2 [Salmo salar]	276	ACH85309.1	transposase-like [Salmo salar]	240.35	AAD30275.1	heat shock protein hsp90 beta [Salmo salar]
Hk_0000745	322	5.37282e-80	AAD30275.1	heat shock protein hsp90 beta [Salmo salar]	100	AAD30275.1	heat shock protein hsp90 beta [Salmo salar]	100	AAD30275.1	heat shock protein hsp90 beta [Salmo salar]	276	ACH85309.1	transposase-like [Salmo salar]	240.35	AAD30275.1	heat shock protein hsp90 beta [Salmo salar]
Hk_0000746	322	5.39082e-80	AAD30275.1	heat shock protein hsp90 beta [Salmo salar]	100	AAD30275.1	heat shock protein hsp90 beta [Salmo salar]	100	AAD30275.1	heat shock protein hsp90 beta [Salmo salar]	276	ACH85309.1	transposase-like [Salmo salar]	240.35	AAD30275.1	heat shock protein hsp90 beta [Salmo salar]
Hk_0000747	213	1.24738e-97	ABV31711.1	transposase [Salmo salar]	100	ACI70134.1	Ribonuclease H1 [Salmo salar]	100	ACI70134.1	Ribonuclease H1 [Salmo salar]	178	ABV31711.1	transposase [Salmo salar]	321.627	ABV31711.1	transposase [Salmo salar]
Hk_0000748	213	1.24661e-97	ABV31711.1	transposase [Salmo salar]	100	ACI70134.1	Ribonuclease H1 [Salmo salar]	100	ACI70134.1	Ribonuclease H1 [Salmo salar]	178	ABV31711.1	transposase [Salmo salar]	321.627	ABV31711.1	transposase [Salmo salar]
Hk_0000749	215	1.25144e-97	ABV31711.1	transposase [Salmo salar]	100	ACI70134.1	Ribonuclease H1 [Salmo salar]	100	ACI70134.1	Ribonuclease H1 [Salmo salar]	178	ABV31711.1	transposase [Salmo salar]	321.627	ABV31711.1	transposase [Salmo salar]
Hk_0000750	221	4.01858e-126	ABV31711.1	transposase [Salmo salar]	100	XP_014000389.1	PREDICTED: probable allantoicase [Salmo salar]	100	XP_014000389.1	PREDICTED: probable allantoicase [Salmo salar]	178	ABV31711.1	transposase [Salmo salar]	321.627	ABV31711.1	transposase [Salmo salar]
Hk_0000751	221	1.25144e-97	ABV31711.1	transposase [Salmo salar]	100	XP_014000389.1	PREDICTED: probable allantoicase [Salmo salar]	100	XP_014000389.1	PREDICTED: probable allantoicase [Salmo salar]	178	ABV31711.1	transposase [Salmo salar]	321.627	ABV31711.1	transposase [Salmo salar]
Hk_0000752	492	6.04384e-76	ACI68988.1	Transposable element Tc1 transposase [Salmo salar]	100	XP_014000280.1	PREDICTED: pre-mRNA-processing factor 39 isoform X2 [Salmo salar]	100	XP_014000280.1	PREDICTED: pre-mRNA-processing factor 39 isoform X2 [Salmo salar]	294	ABV31711.1	transposase [Salmo salar]	232.646	XP_014000279.1	PREDICTED: pre-mRNA-processing factor 39 isoform X1 [Salmo salar]
Hk_0000753	498	6.06029e-76	ACI68988.1	Transposable element Tc1 transposase [Salmo salar]	100	XP_014000280.1	PREDICTED: pre-mRNA-processing factor 39 isoform X2 [Salmo salar]	100	XP_014000280.1	PREDICTED: pre-mRNA-processing factor 39 isoform X2 [Salmo salar]	294	ABV31711.1	transposase [Salmo salar]	232.646	XP_014000279.1	PREDICTED: pre-mRNA-processing factor 39 isoform X1 [Salmo salar]
Hk_0000754	158	3.41173e-153	ACX35599.1	reverse transcriptase-like protein [Salmo salar]	100	ACI69805.1	60S ribosomal protein L32 [Salmo salar]	100	XP_013989550.1	PREDICTED: 60S ribosomal protein L32-like [Salmo salar]	377	AKP40998.1	ORF2 protein [Salmo salar]	488.419	XP_014056412.1	PREDICTED: uncharacterized protein LOC106605384, partial [Salmo salar]
Hk_0000755	157	3.42337e-153	ACX35599.1	reverse transcriptase-like protein [Salmo salar]	100	ACI69805.1	60S ribosomal protein L32 [Salmo salar]	100	XP_013989550.1	PREDICTED: 60S ribosomal protein L32-like [Salmo salar]	377	AKP40998.1	ORF2 protein [Salmo salar]	488.419	XP_014056412.1	PREDICTED: uncharacterized protein LOC106605384, partial [Salmo salar]
Hk_0000756	427	1.21822e-125	XP_014001007.1	PREDICTED: nascent polypeptide-associated complex subunit alpha, muscle-specific form-like isoform X2 [Salmo salar]	100	XP_014001007.1	PREDICTED: nascent polypeptide-associated complex subunit alpha, muscle-specific form-like isoform X2 [Salmo salar]	100	XP_014001007.1	PREDICTED: nascent polypeptide-associated complex subunit alpha, muscle-specific form-like isoform X2 [Salmo salar]	299	XP_014037854.1	PREDICTED: uncharacterized protein LOC106591180 isoform X1 [Salmo salar]	407.912	XP_014001007.1	PREDICTED: nascent polypeptide-associated complex subunit alpha, muscle-specific form-like isoform X2 [Salmo salar]
Hk_0000757	427	1.21381e-125	XP_014001007.1	PREDICTED: nascent polypeptide-associated complex subunit alpha, muscle-specific form-like isoform X2 [Salmo salar]	100	XP_014001007.1	PREDICTED: nascent polypeptide-associated complex subunit alpha, muscle-specific form-like isoform X2 [Salmo salar]	100	XP_014001007.1	PREDICTED: nascent polypeptide-associated complex subunit alpha, muscle-specific form-like isoform X2 [Salmo salar]	299	XP_014037854.1	PREDICTED: uncharacterized protein LOC106591180 isoform X1 [Salmo salar]	407.912	XP_014001007.1	PREDICTED: nascent polypeptide-associated complex subunit alpha, muscle-specific form-like isoform X2 [Salmo salar]
Hk_0000758	427	1.2117e-125	XP_014001007.1	PREDICTED: nascent polypeptide-associated complex subunit alpha, muscle-specific form-like isoform X2 [Salmo salar]	100	XP_014001007.1	PREDICTED: nascent polypeptide-associated complex subunit alpha, muscle-specific form-like isoform X2 [Salmo salar]	100	XP_014001007.1	PREDICTED: nascent polypeptide-associated complex subunit alpha, muscle-specific form-like isoform X2 [Salmo salar]	299	XP_014037854.1	PREDICTED: uncharacterized protein LOC106591180 isoform X1 [Salmo salar]	407.912	XP_014001007.1	PREDICTED: nascent polypeptide-associated complex subunit alpha, muscle-specific form-like isoform X2 [Salmo salar]
Hk_0000759	427	1.2117e-125	XP_014001007.1	PREDICTED: nascent polypeptide-associated complex subunit alpha, muscle-specific form-like isoform X2 [Salmo salar]	100	XP_014001007.1	PREDICTED: nascent polypeptide-associated complex subunit alpha, muscle-specific form-like isoform X2 [Salmo salar]	100	XP_014001007.1	PREDICTED: nascent polypeptide-associated complex subunit alpha, muscle-specific form-like isoform X2 [Salmo salar]	299	XP_014037854.1	PREDICTED: uncharacterized protein LOC106591180 isoform X1 [Salmo salar]	407.912	XP_014001007.1	PREDICTED: nascent polypeptide-associated complex subunit alpha, muscle-specific form-like isoform X2 [Salmo salar]
Hk_0000760	313	9.13882e-40	ABV31710.1	transposase [Salmo salar]	100	XP_014001824.1	PREDICTED: somatostatin-2-like [Salmo salar]	100	XP_014001824.1	PREDICTED: somatostatin-2-like [Salmo salar]	266	ABV31710.1	transposase [Salmo salar]	147.517	ACM09793.1	Transposable element Tc1 transposase [Salmo salar]
Hk_0000761	313	9.09754e-40	ABV31710.1	transposase [Salmo salar]	100	XP_014001824.1	PREDICTED: somatostatin-2-like [Salmo salar]	100	XP_014001824.1	PREDICTED: somatostatin-2-like [Salmo salar]	266	ABV31710.1	transposase [Salmo salar]	147.517	ACM09793.1	Transposable element Tc1 transposase [Salmo salar]
Hk_0000762	144	1.67147e-74	XP_014017894.1	PREDICTED: uncharacterized protein LOC106580886, partial [Salmo salar]	100	XP_014002540.1	PREDICTED: uncharacterized protein LOC106572680 [Salmo salar]	100	XP_014002514.1	PREDICTED: extended synaptotagmin-1-like [Salmo salar]	267	ABV31710.1	transposase [Salmo salar]	245.743	XP_014002514.1	PREDICTED: extended synaptotagmin-1-like [Salmo salar]
Hk_0000763	665	6.03278e-72	XP_014055583.1	PREDICTED: fibroblast growth factor receptor-like 1 isoform X1 [Salmo salar]	100	ACI34158.1	Matrix metalloproteinase-9 precursor [Salmo salar]	100	ACI34158.1	Matrix metalloproteinase-9 precursor [Salmo salar]	279	XP_013986052.1	PREDICTED: CREB-binding protein-like isoform X7 [Salmo salar]	233.417	XP_014055583.1	PREDICTED: fibroblast growth factor receptor-like 1 isoform X1 [Salmo salar]
Hk_0000764	575	8.5997e-142	XP_014002864.1	PREDICTED: zinc finger protein 335-like isoform X3 [Salmo salar]	100	XP_014002864.1	PREDICTED: zinc finger protein 335-like isoform X3 [Salmo salar]	100	XP_014002864.1	PREDICTED: zinc finger protein 335-like isoform X3 [Salmo salar]	419	XP_013989860.1	PREDICTED: zinc finger protein 335-like isoform X5 [Salmo salar]	493.812	XP_014002861.1	PREDICTED: zinc finger protein 335-like isoform X1 [Salmo salar]
Hk_0000765	575	8.64864e-142	XP_014002864.1	PREDICTED: zinc finger protein 335-like isoform X3 [Salmo salar]	100	XP_014002864.1	PREDICTED: zinc finger protein 335-like isoform X3 [Salmo salar]	100	XP_014002864.1	PREDICTED: zinc finger protein 335-like isoform X3 [Salmo salar]	419	XP_013989860.1	PREDICTED: zinc finger protein 335-like isoform X5 [Salmo salar]	493.812	XP_014002861.1	PREDICTED: zinc finger protein 335-like isoform X1 [Salmo salar]
Hk_0000766	575	8.67733e-142	XP_014002864.1	PREDICTED: zinc finger protein 335-like isoform X3 [Salmo salar]	100	XP_014002864.1	PREDICTED: zinc finger protein 335-like isoform X3 [Salmo salar]	100	XP_014002864.1	PREDICTED: zinc finger protein 335-like isoform X3 [Salmo salar]	419	XP_013989860.1	PREDICTED: zinc finger protein 335-like isoform X5 [Salmo salar]	493.812	XP_014002861.1	PREDICTED: zinc finger protein 335-like isoform X1 [Salmo salar]
Hk_0000767	575	8.60814e-142	XP_014002864.1	PREDICTED: zinc finger protein 335-like isoform X3 [Salmo salar]	100	XP_014002864.1	PREDICTED: zinc finger protein 335-like isoform X3 [Salmo salar]	100	XP_014002864.1	PREDICTED: zinc finger protein 335-like isoform X3 [Salmo salar]	419	XP_013989860.1	PREDICTED: zinc finger protein 335-like isoform X5 [Salmo salar]	493.812	XP_014002861.1	PREDICTED: zinc finger protein 335-like isoform X1 [Salmo salar]
Hk_0000768	202	6.82305e-38	AKP40998.1	ORF2 protein [Salmo salar]	100	ACN09940.1	40S ribosomal protein S21 [Salmo salar]	100	ACN09940.1	40S ribosomal protein S21 [Salmo salar]	266	XP_013998309.1	PREDICTED: uncharacterized protein LOC106570465 isoform X1 [Salmo salar]	88.1965	AKP41002.1	zinc finger protein 180-like protein isoform X2 [Salmo salar]
Hk_0000769	1215	1.18459e-54	XP_014045510.1	PREDICTED: transketolase-like protein 1 [Salmo salar]	100	XP_014045510.1	PREDICTED: transketolase-like protein 1 [Salmo salar]	100	XP_014045510.1	PREDICTED: transketolase-like protein 1 [Salmo salar]	328	XP_014042557.1	PREDICTED: proteoglycan 4-like [Salmo salar]	194.126	XP_014045510.1	PREDICTED: transketolase-like protein 1 [Salmo salar]
Hk_0000770	1226	1.18622e-54	XP_014045510.1	PREDICTED: transketolase-like protein 1 [Salmo salar]	100	XP_014045510.1	PREDICTED: transketolase-like protein 1 [Salmo salar]	100	XP_014045510.1	PREDICTED: transketolase-like protein 1 [Salmo salar]	328	XP_014042557.1	PREDICTED: proteoglycan 4-like [Salmo salar]	194.126	XP_014045510.1	PREDICTED: transketolase-like protein 1 [Salmo salar]
Hk_0001132	330	2.13537e-97	ABV31710.1	transposase [Salmo salar]	100	ACI69757.1	Ribose-phosphate pyrophosphokinase 2 [Salmo salar]	100	ACI69757.1	Ribose-phosphate pyrophosphokinase 2 [Salmo salar]	162	ABV31710.1	transposase [Salmo salar]	261.536	ABV31710.1	transposase [Salmo salar]
Hk_0001133	312	2.19818e-97	ABV31710.1	transposase [Salmo salar]	100	ACI69757.1	Ribose-phosphate pyrophosphokinase 2 [Salmo salar]	100	ACI69757.1	Ribose-phosphate pyrophosphokinase 2 [Salmo salar]	162	ABV31710.1	transposase [Salmo salar]	261.536	ABV31710.1	transposase [Salmo salar]
Hk_0001134	297	2.12469e-97	ABV31710.1	transposase [Salmo salar]	100	ACI69757.1	Ribose-phosphate pyrophosphokinase 2 [Salmo salar]	100	ACI69757.1	Ribose-phosphate pyrophosphokinase 2 [Salmo salar]	162	ABV31710.1	transposase [Salmo salar]	261.536	ABV31710.1	transposase [Salmo salar]
Hk_0001135	297	2.13181e-97	ABV31710.1	transposase [Salmo salar]	100	ACI69757.1	Ribose-phosphate pyrophosphokinase 2 [Salmo salar]	100	ACI69757.1	Ribose-phosphate pyrophosphokinase 2 [Salmo salar]	162	ABV31710.1	transposase [Salmo salar]	261.536	ABV31710.1	transposase [Salmo salar]
Hk_0001136	238	1.61144e-151	XP_014019537.1	PREDICTED: uncharacterized protein LOC106581772, partial [Salmo salar]	93.8931	XP_014019537.1	PREDICTED: uncharacterized protein LOC106581772, partial [Salmo salar]	100	ACM08301.1	Calcium-binding protein 39 [Salmo salar]	428	XP_014009168.1	PREDICTED: uncharacterized protein LOC106576489 [Salmo salar]	487.649	XP_014019537.1	PREDICTED: uncharacterized protein LOC106581772, partial [Salmo salar]
Hk_0001137	244	2.20825e-75	XP_014008913.1	PREDICTED: nectin-1-like [Salmo salar]	100	XP_014008913.1	PREDICTED: nectin-1-like [Salmo salar]	100	XP_014008913.1	PREDICTED: nectin-1-like [Salmo salar]	220	ABV31711.1	transposase [Salmo salar]	238.81	XP_014008913.1	PREDICTED: nectin-1-like [Salmo salar]
Hk_0001138	143	6.22823e-33	ACN11500.1	Transposable element Tcb1 transposase [Salmo salar]	100	ACN10073.1	40S ribosomal protein S16 [Salmo salar]	100	ACN10073.1	40S ribosomal protein S16 [Salmo salar]	220	ABV31711.1	transposase [Salmo salar]	129.028	ACN11500.1	Transposable element Tcb1 transposase [Salmo salar]
Hk_0001139	143	6.21504e-33	ACN11500.1	Transposable element Tcb1 transposase [Salmo salar]	100	ACN10073.1	40S ribosomal protein S16 [Salmo salar]	100	ACN10073.1	40S ribosomal protein S16 [Salmo salar]	220	ABV31711.1	transposase [Salmo salar]	129.028	ACN11500.1	Transposable element Tcb1 transposase [Salmo salar]
Hk_0001140	330	2.13537e-97	ABV31710.1	transposase [Salmo salar]	100	ACI69757.1	Ribose-phosphate pyrophosphokinase 2 [Salmo salar]	100	ACI69757.1	Ribose-phosphate pyrophosphokinase 2 [Salmo salar]	162	ABV31710.1	transposase [Salmo salar]	261.536	ABV31710.1	transposase [Salmo salar]
Hk_0001141	312	2.20513e-97	ABV31710.1	transposase [Salmo salar]	100	ACI69757.1	Ribose-phosphate pyrophosphokinase 2 [Salmo salar]	100	ACI69757.1	Ribose-phosphate pyrophosphokinase 2 [Salmo salar]	162	ABV31710.1	transposase [Salmo salar]	261.536	ABV31710.1	transposase [Salmo salar]
Hk_0001142	238	1.6117e-151	XP_014019537.1	PREDICTED: uncharacterized protein LOC106581772, partial [Salmo salar]	93.8931	XP_014019537.1	PREDICTED: uncharacterized protein LOC106581772, partial [Salmo salar]	100	ACM08301.1	Calcium-binding protein 39 [Salmo salar]	428	XP_014009168.1	PREDICTED: uncharacterized protein LOC106576489 [Salmo salar]	487.649	XP_014019537.1	PREDICTED: uncharacterized protein LOC106581772, partial [Salmo salar]
Hk_0001143	244	2.21025e-75	XP_014008913.1	PREDICTED: nectin-1-like [Salmo salar]	100	XP_014008913.1	PREDICTED: nectin-1-like [Salmo salar]	100	XP_014008913.1	PREDICTED: nectin-1-like [Salmo salar]	220	ABV31711.1	transposase [Salmo salar]	238.81	XP_014008913.1	PREDICTED: nectin-1-like [Salmo salar]
Hk_0001144	143	6.22823e-33	ACN11500.1	Transposable element Tcb1 transposase [Salmo salar]	100	ACN10073.1	40S ribosomal protein S16 [Salmo salar]	100	ACN10073.1	40S ribosomal protein S16 [Salmo salar]	220	ABV31711.1	transposase [Salmo salar]	129.028	ACN11500.1	Transposable element Tcb1 transposase [Salmo salar]
Hk_0001145	143	6.21787e-33	ACN11500.1	Transposable element Tcb1 transposase [Salmo salar]	100	ACN10073.1	40S ribosomal protein S16 [Salmo salar]	100	ACN10073.1	40S ribosomal protein S16 [Salmo salar]	220	ABV31711.1	transposase [Salmo salar]	129.028	ACN11500.1	Transposable element Tcb1 transposase [Salmo salar]
Hk_0001604	479	1.40945e-49	ACM08990.1	Cold-inducible RNA-binding protein [Salmo salar]	100	ACM08990.1	Cold-inducible RNA-binding protein [Salmo salar]	100	ACM08990.1	Cold-inducible RNA-binding protein [Salmo salar]	235	ACI66028.1	Transposable element Tcb1 transposase [Salmo salar]	177.563	ACM08990.1	Cold-inducible RNA-binding protein [Salmo salar]
Hk_0001605	208	9.12021e-110	XP_014015946.1	PREDICTED: uncharacterized protein LOC106579983 isoform X1 [Salmo salar]	100	XP_014015946.1	PREDICTED: uncharacterized protein LOC106579983 isoform X1 [Salmo salar]	100	XP_014015946.1	PREDICTED: uncharacterized protein LOC106579983 isoform X1 [Salmo salar]	197	ACM09793.1	Transposable element Tc1 transposase [Salmo salar]	358.221	XP_014015946.1	PREDICTED: uncharacterized protein LOC106579983 isoform X1 [Salmo salar]
Hk_0001606	202	9.11025e-110	XP_014015946.1	PREDICTED: uncharacterized protein LOC106579983 isoform X1 [Salmo salar]	100	XP_014015946.1	PREDICTED: uncharacterized protein LOC106579983 isoform X1 [Salmo salar]	100	XP_014015946.1	PREDICTED: uncharacterized protein LOC106579983 isoform X1 [Salmo salar]	174	XP_014015946.1	PREDICTED: uncharacterized protein LOC106579983 isoform X1 [Salmo salar]	358.221	XP_014015946.1	PREDICTED: uncharacterized protein LOC106579983 isoform X1 [Salmo salar]
Hk_0001607	278	2.77315e-43	ACN11475.1	Transposable element Tcb1 transposase [Salmo salar]	100	ACI33809.1	3-ketoacyl-CoA thiolase, mitochondrial [Salmo salar]	100	ACI33809.1	3-ketoacyl-CoA thiolase, mitochondrial [Salmo salar]	217	AKP40998.1	ORF2 protein [Salmo salar]	157.532	ACI33809.1	3-ketoacyl-CoA thiolase, mitochondrial [Salmo salar]
Hk_0001608	253	2.76439e-43	ACN11475.1	Transposable element Tcb1 transposase [Salmo salar]	100	ACI33809.1	3-ketoacyl-CoA thiolase, mitochondrial [Salmo salar]	100	ACI33809.1	3-ketoacyl-CoA thiolase, mitochondrial [Salmo salar]	164	ABV31711.1	transposase [Salmo salar]	157.532	ACI33809.1	3-ketoacyl-CoA thiolase, mitochondrial [Salmo salar]
Hk_0001609	254	2.75813e-43	ACN11475.1	Transposable element Tcb1 transposase [Salmo salar]	100	ACI33809.1	3-ketoacyl-CoA thiolase, mitochondrial [Salmo salar]	100	ACI33809.1	3-ketoacyl-CoA thiolase, mitochondrial [Salmo salar]	164	ABV31711.1	transposase [Salmo salar]	157.532	ACI33809.1	3-ketoacyl-CoA thiolase, mitochondrial [Salmo salar]
Hk_0001610	261	2.76397e-43	ACN11475.1	Transposable element Tcb1 transposase [Salmo salar]	100	ACI33809.1	3-ketoacyl-CoA thiolase, mitochondrial [Salmo salar]	100	ACI33809.1	3-ketoacyl-CoA thiolase, mitochondrial [Salmo salar]	164	ABV31711.1	transposase [Salmo salar]	157.532	ACI33809.1	3-ketoacyl-CoA thiolase, mitochondrial [Salmo salar]
Hk_0001611	170	1.24358e-28	XP_014040228.1	PREDICTED: zinc finger BED domain-containing protein 4-like [Salmo salar]	100	ACN09951.1	60S ribosomal protein L35a [Salmo salar]	100	ACN09951.1	60S ribosomal protein L35a [Salmo salar]	371	XP_014048809.1	PREDICTED: zinc finger BED domain-containing protein 6-like isoform X2 [Salmo salar]	130.183	XP_014040228.1	PREDICTED: zinc finger BED domain-containing protein 4-like [Salmo salar]
Hk_0001612	172	1.91694e-26	ACN09951.1	60S ribosomal protein L35a [Salmo salar]	100	ACN09951.1	60S ribosomal protein L35a [Salmo salar]	100	ACN09951.1	60S ribosomal protein L35a [Salmo salar]	344	XP_014048808.1	PREDICTED: zinc finger BED domain-containing protein 6-like isoform X1 [Salmo salar]	109.383	ACN09951.1	60S ribosomal protein L35a [Salmo salar]
Hk_0001613	603	5.46988e-37	ACN10099.1	40S ribosomal protein S3 [Salmo salar]	97.8261	ACN10099.1	40S ribosomal protein S3 [Salmo salar]	100	ACN11000.1	Integrator complex subunit 4 [Salmo salar]	294	ACI66028.1	Transposable element Tcb1 transposase [Salmo salar]	144.821	ACI67795.1	40S ribosomal protein S3 [Salmo salar]
Hk_0001614	206	5.47239e-37	ACN10099.1	40S ribosomal protein S3 [Salmo salar]	97.8261	ACN10099.1	40S ribosomal protein S3 [Salmo salar]	100	ACN11000.1	Integrator complex subunit 4 [Salmo salar]	294	ACI66028.1	Transposable element Tcb1 transposase [Salmo salar]	144.821	ACI67795.1	40S ribosomal protein S3 [Salmo salar]
Hk_0001615	233	5.43226e-37	ACN10099.1	40S ribosomal protein S3 [Salmo salar]	97.8261	ACN10099.1	40S ribosomal protein S3 [Salmo salar]	100	ACN11000.1	Integrator complex subunit 4 [Salmo salar]	294	ACI66028.1	Transposable element Tcb1 transposase [Salmo salar]	144.821	ACI67795.1	40S ribosomal protein S3 [Salmo salar]
Hk_0001616	263	5.33711e-59	ABV31710.1	transposase [Salmo salar]	97.8261	ACN10099.1	40S ribosomal protein S3 [Salmo salar]	100	ACN11000.1	Integrator complex subunit 4 [Salmo salar]	294	ACI66028.1	Transposable element Tcb1 transposase [Salmo salar]	144.821	ACI67795.1	40S ribosomal protein S3 [Salmo salar]
Hk_0001617	276	5.34275e-59	ABV31710.1	transposase [Salmo salar]	97.8261	ACN10099.1	40S ribosomal protein S3 [Salmo salar]	100	ACN11000.1	Integrator complex subunit 4 [Salmo salar]	291	ABV31710.1	transposase [Salmo salar]	156.762	ABV31710.1	transposase [Salmo salar]
Hk_0001618	159	8.66735e-123	XP_014056412.1	PREDICTED: uncharacterized protein LOC106605384, partial [Salmo salar]	100	XP_014018340.1	PREDICTED: trafficking protein particle complex subunit 4-like [Salmo salar]	100	XP_014018340.1	PREDICTED: trafficking protein particle complex subunit 4-like [Salmo salar]	271	XP_014056412.1	PREDICTED: uncharacterized protein LOC106605384, partial [Salmo salar]	406.757	XP_014056412.1	PREDICTED: uncharacterized protein LOC106605384, partial [Salmo salar]
Hk_0001619	174	8.68416e-123	XP_014056412.1	PREDICTED: uncharacterized protein LOC106605384, partial [Salmo salar]	100	XP_014018340.1	PREDICTED: trafficking protein particle complex subunit 4-like [Salmo salar]	100	XP_014018340.1	PREDICTED: trafficking protein particle complex subunit 4-like [Salmo salar]	271	XP_014056412.1	PREDICTED: uncharacterized protein LOC106605384, partial [Salmo salar]	406.757	XP_014056412.1	PREDICTED: uncharacterized protein LOC106605384, partial [Salmo salar]
Hk_0001620	174	8.63932e-123	XP_014056412.1	PREDICTED: uncharacterized protein LOC106605384, partial [Salmo salar]	100	XP_014018340.1	PREDICTED: trafficking protein particle complex subunit 4-like [Salmo salar]	100	XP_014018340.1	PREDICTED: trafficking protein particle complex subunit 4-like [Salmo salar]	271	XP_014056412.1	PREDICTED: uncharacterized protein LOC106605384, partial [Salmo salar]	406.757	XP_014056412.1	PREDICTED: uncharacterized protein LOC106605384, partial [Salmo salar]
Hk_0001621	479	1.40945e-49	ACM08990.1	Cold-inducible RNA-binding protein [Salmo salar]	100	ACM08990.1	Cold-inducible RNA-binding protein [Salmo salar]	100	ACM08990.1	Cold-inducible RNA-binding protein [Salmo salar]	235	ACI66028.1	Transposable element Tcb1 transposase [Salmo salar]	177.563	ACM08990.1	Cold-inducible RNA-binding protein [Salmo salar]
Hk_0001622	208	9.14014e-110	XP_014015946.1	PREDICTED: uncharacterized protein LOC106579983 isoform X1 [Salmo salar]	100	XP_014015946.1	PREDICTED: uncharacterized protein LOC106579983 isoform X1 [Salmo salar]	100	XP_014015946.1	PREDICTED: uncharacterized protein LOC106579983 isoform X1 [Salmo salar]	197	ACM09793.1	Transposable element Tc1 transposase [Salmo salar]	358.221	XP_014015946.1	PREDICTED: uncharacterized protein LOC106579983 isoform X1 [Salmo salar]
Hk_0001623	202	9.13017e-110	XP_014015946.1	PREDICTED: uncharacterized protein LOC106579983 isoform X1 [Salmo salar]	100	XP_014015946.1	PREDICTED: uncharacterized protein LOC106579983 isoform X1 [Salmo salar]	100	XP_014015946.1	PREDICTED: uncharacterized protein LOC106579983 isoform X1 [Salmo salar]	174	XP_014015946.1	PREDICTED: uncharacterized protein LOC106579983 isoform X1 [Salmo salar]	358.221	XP_014015946.1	PREDICTED: uncharacterized protein LOC106579983 isoform X1 [Salmo salar]
Hk_0001624	202	9.11736e-110	XP_014015946.1	PREDICTED: uncharacterized protein LOC106579983 isoform X1 [Salmo salar]	100	XP_014015946.1	PREDICTED: uncharacterized protein LOC106579983 isoform X1 [Salmo salar]	100	XP_014015946.1	PREDICTED: uncharacterized protein LOC106579983 isoform X1 [Salmo salar]	174	XP_014015946.1	PREDICTED: uncharacterized protein LOC106579983 isoform X1 [Salmo salar]	358.221	XP_014015946.1	PREDICTED: uncharacterized protein LOC106579983 isoform X1 [Salmo salar]
Hk_0001625	278	2.77315e-43	ACN11475.1	Transposable element Tcb1 transposase [Salmo salar]	100	ACI33809.1	3-ketoacyl-CoA thiolase, mitochondrial [Salmo salar]	100	ACI33809.1	3-ketoacyl-CoA thiolase, mitochondrial [Salmo salar]	217	AKP40998.1	ORF2 protein [Salmo salar]	157.532	ACI33809.1	3-ketoacyl-CoA thiolase, mitochondrial [Salmo salar]
Hk_0001626	253	2.76439e-43	ACN11475.1	Transposable element Tcb1 transposase [Salmo salar]	100	ACI33809.1	3-ketoacyl-CoA thiolase, mitochondrial [Salmo salar]	100	ACI33809.1	3-ketoacyl-CoA thiolase, mitochondrial [Salmo salar]	164	ABV31711.1	transposase [Salmo salar]	157.532	ACI33809.1	3-ketoacyl-CoA thiolase, mitochondrial [Salmo salar]
Hk_0001627	254	2.75813e-43	ACN11475.1	Transposable element Tcb1 transposase [Salmo salar]	100	ACI33809.1	3-ketoacyl-CoA thiolase, mitochondrial [Salmo salar]	100	ACI33809.1	3-ketoacyl-CoA thiolase, mitochondrial [Salmo salar]	164	ABV31711.1	transposase [Salmo salar]	157.532	ACI33809.1	3-ketoacyl-CoA thiolase, mitochondrial [Salmo salar]
Hk_0001628	261	2.76522e-43	ACN11475.1	Transposable element Tcb1 transposase [Salmo salar]	100	ACI33809.1	3-ketoacyl-CoA thiolase, mitochondrial [Salmo salar]	100	ACI33809.1	3-ketoacyl-CoA thiolase, mitochondrial [Salmo salar]	164	ABV31711.1	transposase [Salmo salar]	157.532	ACI33809.1	3-ketoacyl-CoA thiolase, mitochondrial [Salmo salar]
Hk_0001629	98	4.52376e-112	ABV31711.1	transposase [Salmo salar]	100	AEB77813.1	olfactory receptor family C subfamily 2 member 2 [Salmo salar]	100	AEB77813.1	olfactory receptor family C subfamily 2 member 2 [Salmo salar]	258	XP_014026610.1	PREDICTED: selenoprotein P [Salmo salar]	321.242	ABV31711.1	transposase [Salmo salar]
Hk_0001630	170	1.24358e-28	XP_014040228.1	PREDICTED: zinc finger BED domain-containing protein 4-like [Salmo salar]	100	ACN09951.1	60S ribosomal protein L35a [Salmo salar]	100	ACN09951.1	60S ribosomal protein L35a [Salmo salar]	371	XP_014048809.1	PREDICTED: zinc finger BED domain-containing protein 6-like isoform X2 [Salmo salar]	130.183	XP_014040228.1	PREDICTED: zinc finger BED domain-containing protein 4-like [Salmo salar]
Hk_0001631	174	1.91781e-26	ACN09951.1	60S ribosomal protein L35a [Salmo salar]	100	ACN09951.1	60S ribosomal protein L35a [Salmo salar]	100	ACN09951.1	60S ribosomal protein L35a [Salmo salar]	345	XP_014048808.1	PREDICTED: zinc finger BED domain-containing protein 6-like isoform X1 [Salmo salar]	109.383	ACN09951.1	60S ribosomal protein L35a [Salmo salar]
Hk_0001632	604	5.47239e-37	ACN10099.1	40S ribosomal protein S3 [Salmo salar]	97.8261	ACN10099.1	40S ribosomal protein S3 [Salmo salar]	100	ACN11000.1	Integrator complex subunit 4 [Salmo salar]	294	ACI66028.1	Transposable element Tcb1 transposase [Salmo salar]	144.821	ACI67795.1	40S ribosomal protein S3 [Salmo salar]
Hk_0001633	209	5.47908e-37	ACN10099.1	40S ribosomal protein S3 [Salmo salar]	97.8261	ACN10099.1	40S ribosomal protein S3 [Salmo salar]	100	ACN11000.1	Integrator complex subunit 4 [Salmo salar]	294	ACI66028.1	Transposable element Tcb1 transposase [Salmo salar]	144.821	ACI67795.1	40S ribosomal protein S3 [Salmo salar]
Hk_0001634	233	5.4423e-37	ACN10099.1	40S ribosomal protein S3 [Salmo salar]	97.8261	ACN10099.1	40S ribosomal protein S3 [Salmo salar]	100	ACN11000.1	Integrator complex subunit 4 [Salmo salar]	294	ACI66028.1	Transposable element Tcb1 transposase [Salmo salar]	144.821	ACI67795.1	40S ribosomal protein S3 [Salmo salar]
Hk_0001635	268	5.34114e-59	ABV31710.1	transposase [Salmo salar]	97.8261	ACN10099.1	40S ribosomal protein S3 [Salmo salar]	100	ACN11000.1	Integrator complex subunit 4 [Salmo salar]	294	ACI66028.1	Transposable element Tcb1 transposase [Salmo salar]	144.821	ACI67795.1	40S ribosomal protein S3 [Salmo salar]
Hk_0001636	276	5.34999e-59	ABV31710.1	transposase [Salmo salar]	97.8261	ACN10099.1	40S ribosomal protein S3 [Salmo salar]	100	ACN11000.1	Integrator complex subunit 4 [Salmo salar]	291	ABV31710.1	transposase [Salmo salar]	156.762	ABV31710.1	transposase [Salmo salar]
Hk_0001637	159	8.66875e-123	XP_014056412.1	PREDICTED: uncharacterized protein LOC106605384, partial [Salmo salar]	100	XP_014018340.1	PREDICTED: trafficking protein particle complex subunit 4-like [Salmo salar]	100	XP_014018340.1	PREDICTED: trafficking protein particle complex subunit 4-like [Salmo salar]	271	XP_014056412.1	PREDICTED: uncharacterized protein LOC106605384, partial [Salmo salar]	406.757	XP_014056412.1	PREDICTED: uncharacterized protein LOC106605384, partial [Salmo salar]
Hk_0001638	174	8.68416e-123	XP_014056412.1	PREDICTED: uncharacterized protein LOC106605384, partial [Salmo salar]	100	XP_014018340.1	PREDICTED: trafficking protein particle complex subunit 4-like [Salmo salar]	100	XP_014018340.1	PREDICTED: trafficking protein particle complex subunit 4-like [Salmo salar]	271	XP_014056412.1	PREDICTED: uncharacterized protein LOC106605384, partial [Salmo salar]	406.757	XP_014056412.1	PREDICTED: uncharacterized protein LOC106605384, partial [Salmo salar]
Hk_0001639	174	8.64212e-123	XP_014056412.1	PREDICTED: uncharacterized protein LOC106605384, partial [Salmo salar]	100	XP_014018340.1	PREDICTED: trafficking protein particle complex subunit 4-like [Salmo salar]	100	XP_014018340.1	PREDICTED: trafficking protein particle complex subunit 4-like [Salmo salar]	271	XP_014056412.1	PREDICTED: uncharacterized protein LOC106605384, partial [Salmo salar]	406.757	XP_014056412.1	PREDICTED: uncharacterized protein LOC106605384, partial [Salmo salar]
Hk_0000771	401	2.07953e-53	ACN11500.1	Transposable element Tcb1 transposase [Salmo salar]	100	ACH70799.1	hyperosmotic glycine rich protein-like [Salmo salar]	100	ACH70799.1	hyperosmotic glycine rich protein-like [Salmo salar]	167	ABV31711.1	transposase [Salmo salar]	187.578	ACN11500.1	Transposable element Tcb1 transposase [Salmo salar]
Hk_0000772	417	2.08016e-53	ACN11500.1	Transposable element Tcb1 transposase [Salmo salar]	100	ACH70799.1	hyperosmotic glycine rich protein-like [Salmo salar]	100	ACH70799.1	hyperosmotic glycine rich protein-like [Salmo salar]	167	ABV31711.1	transposase [Salmo salar]	187.578	ACN11500.1	Transposable element Tcb1 transposase [Salmo salar]
Hk_0000773	404	2.08048e-53	ACN11500.1	Transposable element Tcb1 transposase [Salmo salar]	100	ACH70799.1	hyperosmotic glycine rich protein-like [Salmo salar]	100	ACH70799.1	hyperosmotic glycine rich protein-like [Salmo salar]	167	ABV31711.1	transposase [Salmo salar]	187.578	ACN11500.1	Transposable element Tcb1 transposase [Salmo salar]
Hk_0000774	274	9.30341e-120	XP_014026626.1	PREDICTED: trifunctional nucleotide phosphoesterase protein YfkN-like isoform X3 [Salmo salar]	100	XP_014026123.1	PREDICTED: E3 ubiquitin-protein ligase RNF180-like [Salmo salar]	100	XP_014026123.1	PREDICTED: E3 ubiquitin-protein ligase RNF180-like [Salmo salar]	260	XP_014017512.1	PREDICTED: trifunctional nucleotide phosphoesterase protein YfkN-like isoform X1 [Salmo salar]	342.428	XP_014026626.1	PREDICTED: trifunctional nucleotide phosphoesterase protein YfkN-like isoform X3 [Salmo salar]
Hk_0000775	318	2.68456e-152	XP_014029938.1	PREDICTED: 60S ribosomal protein L8-like [Salmo salar]	100	XP_014026490.1	PREDICTED: TNF receptor-associated factor 2-like isoform X2 [Salmo salar]	100	XP_014026490.1	PREDICTED: TNF receptor-associated factor 2-like isoform X2 [Salmo salar]	266	XP_014029938.1	PREDICTED: 60S ribosomal protein L8-like [Salmo salar]	476.863	XP_014029938.1	PREDICTED: 60S ribosomal protein L8-like [Salmo salar]
Hk_0000776	319	7.63266e-152	XP_014029938.1	PREDICTED: 60S ribosomal protein L8-like [Salmo salar]	100	XP_014026490.1	PREDICTED: TNF receptor-associated factor 2-like isoform X2 [Salmo salar]	100	XP_014026490.1	PREDICTED: TNF receptor-associated factor 2-like isoform X2 [Salmo salar]	266	XP_014029938.1	PREDICTED: 60S ribosomal protein L8-like [Salmo salar]	475.707	XP_014029938.1	PREDICTED: 60S ribosomal protein L8-like [Salmo salar]
Hk_0000777	247	1.09962e-135	ABV31711.1	transposase [Salmo salar]	100	ACI33809.1	3-ketoacyl-CoA thiolase, mitochondrial [Salmo salar]	100	ACI33809.1	3-ketoacyl-CoA thiolase, mitochondrial [Salmo salar]	166	ABV31711.1	transposase [Salmo salar]	338.961	ABV31711.1	transposase [Salmo salar]
Hk_0000778	284	1.09546e-135	ABV31711.1	transposase [Salmo salar]	100	ACI33809.1	3-ketoacyl-CoA thiolase, mitochondrial [Salmo salar]	100	ACI33809.1	3-ketoacyl-CoA thiolase, mitochondrial [Salmo salar]	208	XP_014063122.1	PREDICTED: uncharacterized protein LOC106609167 [Salmo salar]	338.961	ABV31711.1	transposase [Salmo salar]
Hk_0000779	286	1.09396e-135	ABV31711.1	transposase [Salmo salar]	100	ACI33809.1	3-ketoacyl-CoA thiolase, mitochondrial [Salmo salar]	100	ACI33809.1	3-ketoacyl-CoA thiolase, mitochondrial [Salmo salar]	208	XP_014063122.1	PREDICTED: uncharacterized protein LOC106609167 [Salmo salar]	338.961	ABV31711.1	transposase [Salmo salar]
Hk_0000780	288	1.09479e-135	ABV31711.1	transposase [Salmo salar]	100	ACI33809.1	3-ketoacyl-CoA thiolase, mitochondrial [Salmo salar]	100	ACI33809.1	3-ketoacyl-CoA thiolase, mitochondrial [Salmo salar]	208	XP_014063122.1	PREDICTED: uncharacterized protein LOC106609167 [Salmo salar]	338.961	ABV31711.1	transposase [Salmo salar]
Hk_0000781	691	5.30213e-178	XP_014056412.1	PREDICTED: uncharacterized protein LOC106605384, partial [Salmo salar]	100	XP_014027129.1	PREDICTED: golgin subfamily A member 1-like isoform X4 [Salmo salar]	100	XP_014027129.1	PREDICTED: golgin subfamily A member 1-like isoform X4 [Salmo salar]	460	XP_013993687.1	PREDICTED: titin-like isoform X1 [Salmo salar]	512.686	XP_014056412.1	PREDICTED: uncharacterized protein LOC106605384, partial [Salmo salar]
Hk_0000782	682	0	XP_014056412.1	PREDICTED: uncharacterized protein LOC106605384, partial [Salmo salar]	100	XP_014027129.1	PREDICTED: golgin subfamily A member 1-like isoform X4 [Salmo salar]	100	ACX35599.1	reverse transcriptase-like protein [Salmo salar]	460	XP_013993687.1	PREDICTED: titin-like isoform X1 [Salmo salar]	512.686	XP_014056412.1	PREDICTED: uncharacterized protein LOC106605384, partial [Salmo salar]
Hk_0000783	679	0	XP_014056412.1	PREDICTED: uncharacterized protein LOC106605384, partial [Salmo salar]	100	XP_014027129.1	PREDICTED: golgin subfamily A member 1-like isoform X4 [Salmo salar]	100	ACX35599.1	reverse transcriptase-like protein [Salmo salar]	460	XP_013993687.1	PREDICTED: titin-like isoform X1 [Salmo salar]	512.686	XP_014056412.1	PREDICTED: uncharacterized protein LOC106605384, partial [Salmo salar]
Hk_0000784	213	1.39249e-162	ABV31711.1	transposase [Salmo salar]	100	ACM08863.1	Histone H1 [Salmo salar]	100	ACM08863.1	Histone H1 [Salmo salar]	298	ABV31711.1	transposase [Salmo salar]	508.064	ABV31711.1	transposase [Salmo salar]
Hk_0000785	401	2.09559e-53	ACN11500.1	Transposable element Tcb1 transposase [Salmo salar]	100	ACH70799.1	hyperosmotic glycine rich protein-like [Salmo salar]	100	ACH70799.1	hyperosmotic glycine rich protein-like [Salmo salar]	167	ABV31711.1	transposase [Salmo salar]	187.578	ACN11500.1	Transposable element Tcb1 transposase [Salmo salar]
Hk_0000786	404	2.0767e-53	ACN11500.1	Transposable element Tcb1 transposase [Salmo salar]	100	ACH70799.1	hyperosmotic glycine rich protein-like [Salmo salar]	100	ACH70799.1	hyperosmotic glycine rich protein-like [Salmo salar]	167	ABV31711.1	transposase [Salmo salar]	187.578	ACN11500.1	Transposable element Tcb1 transposase [Salmo salar]
Hk_0000787	404	2.07638e-53	ACN11500.1	Transposable element Tcb1 transposase [Salmo salar]	100	ACH70799.1	hyperosmotic glycine rich protein-like [Salmo salar]	100	ACH70799.1	hyperosmotic glycine rich protein-like [Salmo salar]	167	ABV31711.1	transposase [Salmo salar]	187.578	ACN11500.1	Transposable element Tcb1 transposase [Salmo salar]
Hk_0000788	404	2.09622e-53	ACN11500.1	Transposable element Tcb1 transposase [Salmo salar]	100	ACH70799.1	hyperosmotic glycine rich protein-like [Salmo salar]	100	ACH70799.1	hyperosmotic glycine rich protein-like [Salmo salar]	167	ABV31711.1	transposase [Salmo salar]	187.578	ACN11500.1	Transposable element Tcb1 transposase [Salmo salar]
Hk_0000789	274	9.31047e-120	XP_014026626.1	PREDICTED: trifunctional nucleotide phosphoesterase protein YfkN-like isoform X3 [Salmo salar]	100	XP_014026123.1	PREDICTED: E3 ubiquitin-protein ligase RNF180-like [Salmo salar]	100	XP_014026123.1	PREDICTED: E3 ubiquitin-protein ligase RNF180-like [Salmo salar]	260	XP_014017512.1	PREDICTED: trifunctional nucleotide phosphoesterase protein YfkN-like isoform X1 [Salmo salar]	342.428	XP_014026626.1	PREDICTED: trifunctional nucleotide phosphoesterase protein YfkN-like isoform X3 [Salmo salar]
Hk_0000790	318	2.68621e-152	XP_014029938.1	PREDICTED: 60S ribosomal protein L8-like [Salmo salar]	100	XP_014026490.1	PREDICTED: TNF receptor-associated factor 2-like isoform X2 [Salmo salar]	100	XP_014026490.1	PREDICTED: TNF receptor-associated factor 2-like isoform X2 [Salmo salar]	266	XP_014029938.1	PREDICTED: 60S ribosomal protein L8-like [Salmo salar]	476.863	XP_014029938.1	PREDICTED: 60S ribosomal protein L8-like [Salmo salar]
Hk_0000791	318	2.68003e-152	XP_014029938.1	PREDICTED: 60S ribosomal protein L8-like [Salmo salar]	100	XP_014026490.1	PREDICTED: TNF receptor-associated factor 2-like isoform X2 [Salmo salar]	100	XP_014026490.1	PREDICTED: TNF receptor-associated factor 2-like isoform X2 [Salmo salar]	266	XP_014029938.1	PREDICTED: 60S ribosomal protein L8-like [Salmo salar]	476.863	XP_014029938.1	PREDICTED: 60S ribosomal protein L8-like [Salmo salar]
Hk_0000792	319	7.635e-152	XP_014029938.1	PREDICTED: 60S ribosomal protein L8-like [Salmo salar]	100	XP_014026490.1	PREDICTED: TNF receptor-associated factor 2-like isoform X2 [Salmo salar]	100	XP_014026490.1	PREDICTED: TNF receptor-associated factor 2-like isoform X2 [Salmo salar]	266	XP_014029938.1	PREDICTED: 60S ribosomal protein L8-like [Salmo salar]	475.707	XP_014029938.1	PREDICTED: 60S ribosomal protein L8-like [Salmo salar]
Hk_0000793	247	1.09962e-135	ABV31711.1	transposase [Salmo salar]	100	ACI33809.1	3-ketoacyl-CoA thiolase, mitochondrial [Salmo salar]	100	ACI33809.1	3-ketoacyl-CoA thiolase, mitochondrial [Salmo salar]	166	ABV31711.1	transposase [Salmo salar]	338.961	ABV31711.1	transposase [Salmo salar]
Hk_0000794	284	1.09529e-135	ABV31711.1	transposase [Salmo salar]	100	ACI33809.1	3-ketoacyl-CoA thiolase, mitochondrial [Salmo salar]	100	ACI33809.1	3-ketoacyl-CoA thiolase, mitochondrial [Salmo salar]	208	XP_014063122.1	PREDICTED: uncharacterized protein LOC106609167 [Salmo salar]	338.961	ABV31711.1	transposase [Salmo salar]
Hk_0000795	286	1.09429e-135	ABV31711.1	transposase [Salmo salar]	100	ACI33809.1	3-ketoacyl-CoA thiolase, mitochondrial [Salmo salar]	100	ACI33809.1	3-ketoacyl-CoA thiolase, mitochondrial [Salmo salar]	208	XP_014063122.1	PREDICTED: uncharacterized protein LOC106609167 [Salmo salar]	338.961	ABV31711.1	transposase [Salmo salar]
Hk_0000796	288	1.09546e-135	ABV31711.1	transposase [Salmo salar]	100	ACI33809.1	3-ketoacyl-CoA thiolase, mitochondrial [Salmo salar]	100	ACI33809.1	3-ketoacyl-CoA thiolase, mitochondrial [Salmo salar]	208	XP_014063122.1	PREDICTED: uncharacterized protein LOC106609167 [Salmo salar]	338.961	ABV31711.1	transposase [Salmo salar]
Hk_0000797	692	4.22308e-179	XP_014056412.1	PREDICTED: uncharacterized protein LOC106605384, partial [Salmo salar]	100	XP_014027129.1	PREDICTED: golgin subfamily A member 1-like isoform X4 [Salmo salar]	100	ACX35599.1	reverse transcriptase-like protein [Salmo salar]	460	XP_013993687.1	PREDICTED: titin-like isoform X1 [Salmo salar]	512.301	XP_014056412.1	PREDICTED: uncharacterized protein LOC106605384, partial [Salmo salar]
Hk_0000798	682	0	XP_014056412.1	PREDICTED: uncharacterized protein LOC106605384, partial [Salmo salar]	100	XP_014027129.1	PREDICTED: golgin subfamily A member 1-like isoform X4 [Salmo salar]	100	ACX35599.1	reverse transcriptase-like protein [Salmo salar]	460	XP_013993687.1	PREDICTED: titin-like isoform X1 [Salmo salar]	512.686	XP_014056412.1	PREDICTED: uncharacterized protein LOC106605384, partial [Salmo salar]
Hk_0000799	679	0	XP_014056412.1	PREDICTED: uncharacterized protein LOC106605384, partial [Salmo salar]	100	XP_014027129.1	PREDICTED: golgin subfamily A member 1-like isoform X4 [Salmo salar]	100	ACX35599.1	reverse transcriptase-like protein [Salmo salar]	460	XP_013993687.1	PREDICTED: titin-like isoform X1 [Salmo salar]	512.686	XP_014056412.1	PREDICTED: uncharacterized protein LOC106605384, partial [Salmo salar]
Hk_0000800	215	1.39311e-162	ABV31711.1	transposase [Salmo salar]	100	ACM08863.1	Histone H1 [Salmo salar]	100	ACM08863.1	Histone H1 [Salmo salar]	298	ABV31711.1	transposase [Salmo salar]	508.064	ABV31711.1	transposase [Salmo salar]
Hk_0000875	498	1.47947e-133	XP_014029316.1	PREDICTED: TBC1 domain family member 8-like isoform X1 [Salmo salar]	100	XP_014029316.1	PREDICTED: TBC1 domain family member 8-like isoform X1 [Salmo salar]	100	XP_014029316.1	PREDICTED: TBC1 domain family member 8-like isoform X1 [Salmo salar]	329	AKP40998.1	ORF2 protein [Salmo salar]	247.284	XP_014029316.1	PREDICTED: TBC1 domain family member 8-like isoform X1 [Salmo salar]
Hk_0000876	314	5.56e-89	XP_014029316.1	PREDICTED: TBC1 domain family member 8-like isoform X1 [Salmo salar]	100	XP_014029316.1	PREDICTED: TBC1 domain family member 8-like isoform X1 [Salmo salar]	100	XP_014029316.1	PREDICTED: TBC1 domain family member 8-like isoform X1 [Salmo salar]	329	AKP40998.1	ORF2 protein [Salmo salar]	222.246	ACI66028.1	Transposable element Tcb1 transposase [Salmo salar]
Hk_0000877	294	5.0627e-91	XP_014029316.1	PREDICTED: TBC1 domain family member 8-like isoform X1 [Salmo salar]	100	XP_014029316.1	PREDICTED: TBC1 domain family member 8-like isoform X1 [Salmo salar]	100	XP_014029316.1	PREDICTED: TBC1 domain family member 8-like isoform X1 [Salmo salar]	329	AKP40998.1	ORF2 protein [Salmo salar]	222.246	ACI66028.1	Transposable element Tcb1 transposase [Salmo salar]
Hk_0000878	152	2.50878e-103	XP_014020017.1	PREDICTED: centrosomal protein of 97 kDa isoform X3 [Salmo salar]	100	ACI67654.1	Centrosomal protein of 97 kDa [Salmo salar]	100	XP_014020017.1	PREDICTED: centrosomal protein of 97 kDa isoform X3 [Salmo salar]	287	XP_014020017.1	PREDICTED: centrosomal protein of 97 kDa isoform X3 [Salmo salar]	352.829	XP_014020016.1	PREDICTED: centrosomal protein of 97 kDa isoform X2 [Salmo salar]
Hk_0000879	136	2.51166e-103	XP_014020017.1	PREDICTED: centrosomal protein of 97 kDa isoform X3 [Salmo salar]	100	ACI67654.1	Centrosomal protein of 97 kDa [Salmo salar]	100	XP_014020017.1	PREDICTED: centrosomal protein of 97 kDa isoform X3 [Salmo salar]	287	XP_014020017.1	PREDICTED: centrosomal protein of 97 kDa isoform X3 [Salmo salar]	352.829	XP_014020016.1	PREDICTED: centrosomal protein of 97 kDa isoform X2 [Salmo salar]
Hk_0000880	139	2.50713e-103	XP_014020017.1	PREDICTED: centrosomal protein of 97 kDa isoform X3 [Salmo salar]	100	ACH70732.1	brain protein 44 [Salmo salar]	100	XP_014020017.1	PREDICTED: centrosomal protein of 97 kDa isoform X3 [Salmo salar]	287	XP_014020017.1	PREDICTED: centrosomal protein of 97 kDa isoform X3 [Salmo salar]	352.829	XP_014020016.1	PREDICTED: centrosomal protein of 97 kDa isoform X2 [Salmo salar]
Hk_0000881	656	9.1663e-84	XP_014013318.1	PREDICTED: uncharacterized protein LOC106578716 [Salmo salar]	100	XP_014029938.1	PREDICTED: 60S ribosomal protein L8-like [Salmo salar]	100	XP_014029938.1	PREDICTED: 60S ribosomal protein L8-like [Salmo salar]	264	ACN11475.1	Transposable element Tcb1 transposase [Salmo salar]	292.738	XP_014013318.1	PREDICTED: uncharacterized protein LOC106578716 [Salmo salar]
Hk_0000882	655	9.23764e-84	XP_014013318.1	PREDICTED: uncharacterized protein LOC106578716 [Salmo salar]	100	XP_014029938.1	PREDICTED: 60S ribosomal protein L8-like [Salmo salar]	100	XP_014029938.1	PREDICTED: 60S ribosomal protein L8-like [Salmo salar]	264	ACN11475.1	Transposable element Tcb1 transposase [Salmo salar]	292.738	XP_014013318.1	PREDICTED: uncharacterized protein LOC106578716 [Salmo salar]
Hk_0000883	613	9.16778e-84	XP_014013318.1	PREDICTED: uncharacterized protein LOC106578716 [Salmo salar]	100	XP_014029938.1	PREDICTED: 60S ribosomal protein L8-like [Salmo salar]	100	XP_014029938.1	PREDICTED: 60S ribosomal protein L8-like [Salmo salar]	264	ACN11475.1	Transposable element Tcb1 transposase [Salmo salar]	292.738	XP_014013318.1	PREDICTED: uncharacterized protein LOC106578716 [Salmo salar]
Hk_0000884	605	9.17522e-84	XP_014013318.1	PREDICTED: uncharacterized protein LOC106578716 [Salmo salar]	100	XP_014029938.1	PREDICTED: 60S ribosomal protein L8-like [Salmo salar]	100	XP_014029938.1	PREDICTED: 60S ribosomal protein L8-like [Salmo salar]	264	ACN11475.1	Transposable element Tcb1 transposase [Salmo salar]	292.738	XP_014013318.1	PREDICTED: uncharacterized protein LOC106578716 [Salmo salar]
Hk_0000885	941	0	ACO07304.1	TLR8-like protein [Salmo salar]	100	XP_014029966.1	PREDICTED: toll-like receptor 7 [Salmo salar]	100	XP_014029966.1	PREDICTED: toll-like receptor 7 [Salmo salar]	1072	ABV59002.1	toll-like receptor 9 [Salmo salar]	2117.43	ACO07304.1	TLR8-like protein [Salmo salar]
Hk_0000886	1174	0	ACO07304.1	TLR8-like protein [Salmo salar]	100	XP_014029966.1	PREDICTED: toll-like receptor 7 [Salmo salar]	100	XP_014029966.1	PREDICTED: toll-like receptor 7 [Salmo salar]	1072	ABV59002.1	toll-like receptor 9 [Salmo salar]	2117.43	ACO07304.1	TLR8-like protein [Salmo salar]
Hk_0000887	498	1.47947e-133	XP_014029316.1	PREDICTED: TBC1 domain family member 8-like isoform X1 [Salmo salar]	100	XP_014029316.1	PREDICTED: TBC1 domain family member 8-like isoform X1 [Salmo salar]	100	XP_014029316.1	PREDICTED: TBC1 domain family member 8-like isoform X1 [Salmo salar]	329	AKP40998.1	ORF2 protein [Salmo salar]	247.284	XP_014029316.1	PREDICTED: TBC1 domain family member 8-like isoform X1 [Salmo salar]
Hk_0000888	314	5.56168e-89	XP_014029316.1	PREDICTED: TBC1 domain family member 8-like isoform X1 [Salmo salar]	100	XP_014029316.1	PREDICTED: TBC1 domain family member 8-like isoform X1 [Salmo salar]	100	XP_014029316.1	PREDICTED: TBC1 domain family member 8-like isoform X1 [Salmo salar]	329	AKP40998.1	ORF2 protein [Salmo salar]	222.246	ACI66028.1	Transposable element Tcb1 transposase [Salmo salar]
Hk_0000889	294	5.06347e-91	XP_014029316.1	PREDICTED: TBC1 domain family member 8-like isoform X1 [Salmo salar]	100	XP_014029316.1	PREDICTED: TBC1 domain family member 8-like isoform X1 [Salmo salar]	100	XP_014029316.1	PREDICTED: TBC1 domain family member 8-like isoform X1 [Salmo salar]	329	AKP40998.1	ORF2 protein [Salmo salar]	222.246	ACI66028.1	Transposable element Tcb1 transposase [Salmo salar]
Hk_0000890	152	2.50878e-103	XP_014020017.1	PREDICTED: centrosomal protein of 97 kDa isoform X3 [Salmo salar]	100	ACI67654.1	Centrosomal protein of 97 kDa [Salmo salar]	100	XP_014020017.1	PREDICTED: centrosomal protein of 97 kDa isoform X3 [Salmo salar]	287	XP_014020017.1	PREDICTED: centrosomal protein of 97 kDa isoform X3 [Salmo salar]	352.829	XP_014020016.1	PREDICTED: centrosomal protein of 97 kDa isoform X2 [Salmo salar]
Hk_0000891	136	2.5133e-103	XP_014020017.1	PREDICTED: centrosomal protein of 97 kDa isoform X3 [Salmo salar]	100	ACI67654.1	Centrosomal protein of 97 kDa [Salmo salar]	100	XP_014020017.1	PREDICTED: centrosomal protein of 97 kDa isoform X3 [Salmo salar]	287	XP_014020017.1	PREDICTED: centrosomal protein of 97 kDa isoform X3 [Salmo salar]	352.829	XP_014020016.1	PREDICTED: centrosomal protein of 97 kDa isoform X2 [Salmo salar]
Hk_0000892	139	2.51083e-103	XP_014020017.1	PREDICTED: centrosomal protein of 97 kDa isoform X3 [Salmo salar]	100	ACH70732.1	brain protein 44 [Salmo salar]	100	XP_014020017.1	PREDICTED: centrosomal protein of 97 kDa isoform X3 [Salmo salar]	287	XP_014020017.1	PREDICTED: centrosomal protein of 97 kDa isoform X3 [Salmo salar]	352.829	XP_014020016.1	PREDICTED: centrosomal protein of 97 kDa isoform X2 [Salmo salar]
Hk_0000893	655	9.17076e-84	XP_014013318.1	PREDICTED: uncharacterized protein LOC106578716 [Salmo salar]	100	XP_014029938.1	PREDICTED: 60S ribosomal protein L8-like [Salmo salar]	100	XP_014029938.1	PREDICTED: 60S ribosomal protein L8-like [Salmo salar]	264	ACN11475.1	Transposable element Tcb1 transposase [Salmo salar]	292.738	XP_014013318.1	PREDICTED: uncharacterized protein LOC106578716 [Salmo salar]
Hk_0000894	657	9.15143e-84	XP_014013318.1	PREDICTED: uncharacterized protein LOC106578716 [Salmo salar]	100	XP_014029938.1	PREDICTED: 60S ribosomal protein L8-like [Salmo salar]	100	XP_014029938.1	PREDICTED: 60S ribosomal protein L8-like [Salmo salar]	264	ACN11475.1	Transposable element Tcb1 transposase [Salmo salar]	292.738	XP_014013318.1	PREDICTED: uncharacterized protein LOC106578716 [Salmo salar]
Hk_0000895	655	9.24062e-84	XP_014013318.1	PREDICTED: uncharacterized protein LOC106578716 [Salmo salar]	100	XP_014029938.1	PREDICTED: 60S ribosomal protein L8-like [Salmo salar]	100	XP_014029938.1	PREDICTED: 60S ribosomal protein L8-like [Salmo salar]	264	ACN11475.1	Transposable element Tcb1 transposase [Salmo salar]	292.738	XP_014013318.1	PREDICTED: uncharacterized protein LOC106578716 [Salmo salar]
Hk_0000896	613	9.17224e-84	XP_014013318.1	PREDICTED: uncharacterized protein LOC106578716 [Salmo salar]	100	XP_014029938.1	PREDICTED: 60S ribosomal protein L8-like [Salmo salar]	100	XP_014029938.1	PREDICTED: 60S ribosomal protein L8-like [Salmo salar]	264	ACN11475.1	Transposable element Tcb1 transposase [Salmo salar]	292.738	XP_014013318.1	PREDICTED: uncharacterized protein LOC106578716 [Salmo salar]
Hk_0000897	605	9.18413e-84	XP_014013318.1	PREDICTED: uncharacterized protein LOC106578716 [Salmo salar]	100	XP_014029938.1	PREDICTED: 60S ribosomal protein L8-like [Salmo salar]	100	XP_014029938.1	PREDICTED: 60S ribosomal protein L8-like [Salmo salar]	264	ACN11475.1	Transposable element Tcb1 transposase [Salmo salar]	292.738	XP_014013318.1	PREDICTED: uncharacterized protein LOC106578716 [Salmo salar]
Hk_0000898	941	0	ACO07304.1	TLR8-like protein [Salmo salar]	100	XP_014029966.1	PREDICTED: toll-like receptor 7 [Salmo salar]	100	XP_014029966.1	PREDICTED: toll-like receptor 7 [Salmo salar]	1072	ABV59002.1	toll-like receptor 9 [Salmo salar]	2117.43	ACO07304.1	TLR8-like protein [Salmo salar]
Hk_0000899	1174	0	ACO07304.1	TLR8-like protein [Salmo salar]	100	XP_014029966.1	PREDICTED: toll-like receptor 7 [Salmo salar]	100	XP_014029966.1	PREDICTED: toll-like receptor 7 [Salmo salar]	1072	ABV59002.1	toll-like receptor 9 [Salmo salar]	2117.43	ACO07304.1	TLR8-like protein [Salmo salar]

## Sheet: Multi BLAST_intestine
Query	Number of HSPs	Lowest E-value	Accession (E-value)	Description (E-value)	Greatest identity %	Accession (identity %)	Description (identity %)	Greatest positive %	Accession (positive %)	Description (positive %)	Greatest HSP length	Accession (HSP length)	Description (HSP length)	Greatest bit score	Accession (bit score)	Description (bit score)
Int_0000452	1264	1.07604e-177	XP_014050141.1	PREDICTED: zinc finger protein 3 homolog [Salmo salar]	100	XP_014050141.1	PREDICTED: zinc finger protein 3 homolog [Salmo salar]	100	XP_014050141.1	PREDICTED: zinc finger protein 3 homolog [Salmo salar]	315	XP_014013533.1	PREDICTED: zinc finger MYM-type protein 1-like isoform X1 [Salmo salar]	555.444	XP_014050141.1	PREDICTED: zinc finger protein 3 homolog [Salmo salar]
Int_0000453	1264	1.07536e-177	XP_014050141.1	PREDICTED: zinc finger protein 3 homolog [Salmo salar]	100	XP_014050141.1	PREDICTED: zinc finger protein 3 homolog [Salmo salar]	100	XP_014050141.1	PREDICTED: zinc finger protein 3 homolog [Salmo salar]	315	XP_014013533.1	PREDICTED: zinc finger MYM-type protein 1-like isoform X1 [Salmo salar]	555.444	XP_014050141.1	PREDICTED: zinc finger protein 3 homolog [Salmo salar]
Int_0000454	1264	1.07924e-177	XP_014050141.1	PREDICTED: zinc finger protein 3 homolog [Salmo salar]	100	XP_014050141.1	PREDICTED: zinc finger protein 3 homolog [Salmo salar]	100	XP_014050141.1	PREDICTED: zinc finger protein 3 homolog [Salmo salar]	315	XP_014013533.1	PREDICTED: zinc finger MYM-type protein 1-like isoform X1 [Salmo salar]	555.444	XP_014050141.1	PREDICTED: zinc finger protein 3 homolog [Salmo salar]
Int_0000455	1264	1.08076e-177	XP_014050141.1	PREDICTED: zinc finger protein 3 homolog [Salmo salar]	100	XP_014050141.1	PREDICTED: zinc finger protein 3 homolog [Salmo salar]	100	XP_014050141.1	PREDICTED: zinc finger protein 3 homolog [Salmo salar]	315	XP_014013533.1	PREDICTED: zinc finger MYM-type protein 1-like isoform X1 [Salmo salar]	555.444	XP_014050141.1	PREDICTED: zinc finger protein 3 homolog [Salmo salar]
Int_0000456	1264	1.07739e-177	XP_014050141.1	PREDICTED: zinc finger protein 3 homolog [Salmo salar]	100	XP_014050141.1	PREDICTED: zinc finger protein 3 homolog [Salmo salar]	100	XP_014050141.1	PREDICTED: zinc finger protein 3 homolog [Salmo salar]	315	XP_014013533.1	PREDICTED: zinc finger MYM-type protein 1-like isoform X1 [Salmo salar]	555.444	XP_014050141.1	PREDICTED: zinc finger protein 3 homolog [Salmo salar]
Int_0000457	1264	1.07604e-177	XP_014050141.1	PREDICTED: zinc finger protein 3 homolog [Salmo salar]	100	XP_014050141.1	PREDICTED: zinc finger protein 3 homolog [Salmo salar]	100	XP_014050141.1	PREDICTED: zinc finger protein 3 homolog [Salmo salar]	315	XP_014013533.1	PREDICTED: zinc finger MYM-type protein 1-like isoform X1 [Salmo salar]	555.444	XP_014050141.1	PREDICTED: zinc finger protein 3 homolog [Salmo salar]
Int_0000458	348	1.70958e-82	XP_014050138.1	PREDICTED: uncharacterized protein LOC106602182 [Salmo salar]	100	XP_014050138.1	PREDICTED: uncharacterized protein LOC106602182 [Salmo salar]	100	XP_014050138.1	PREDICTED: uncharacterized protein LOC106602182 [Salmo salar]	565	AKP40998.1	ORF2 protein [Salmo salar]	289.656	XP_014050138.1	PREDICTED: uncharacterized protein LOC106602182 [Salmo salar]
Int_0000459	349	0	XP_014050138.1	PREDICTED: uncharacterized protein LOC106602182 [Salmo salar]	100	XP_014050108.1	PREDICTED: ladderlectin-like [Salmo salar]	100	XP_014050138.1	PREDICTED: uncharacterized protein LOC106602182 [Salmo salar]	565	AKP40998.1	ORF2 protein [Salmo salar]	650.588	XP_014050138.1	PREDICTED: uncharacterized protein LOC106602182 [Salmo salar]
Int_0000460	349	0	XP_014050138.1	PREDICTED: uncharacterized protein LOC106602182 [Salmo salar]	100	XP_014050108.1	PREDICTED: ladderlectin-like [Salmo salar]	100	XP_014050138.1	PREDICTED: uncharacterized protein LOC106602182 [Salmo salar]	565	AKP40998.1	ORF2 protein [Salmo salar]	650.588	XP_014050138.1	PREDICTED: uncharacterized protein LOC106602182 [Salmo salar]
Int_0000461	349	0	XP_014050138.1	PREDICTED: uncharacterized protein LOC106602182 [Salmo salar]	100	XP_014050108.1	PREDICTED: ladderlectin-like [Salmo salar]	100	XP_014050138.1	PREDICTED: uncharacterized protein LOC106602182 [Salmo salar]	565	AKP40998.1	ORF2 protein [Salmo salar]	650.588	XP_014050138.1	PREDICTED: uncharacterized protein LOC106602182 [Salmo salar]
Int_0000462	353	0	XP_014050138.1	PREDICTED: uncharacterized protein LOC106602182 [Salmo salar]	100	XP_014050108.1	PREDICTED: ladderlectin-like [Salmo salar]	100	XP_014050138.1	PREDICTED: uncharacterized protein LOC106602182 [Salmo salar]	565	AKP40998.1	ORF2 protein [Salmo salar]	650.588	XP_014050138.1	PREDICTED: uncharacterized protein LOC106602182 [Salmo salar]
Int_0000463	341	0	XP_014050138.1	PREDICTED: uncharacterized protein LOC106602182 [Salmo salar]	100	XP_014050108.1	PREDICTED: ladderlectin-like [Salmo salar]	100	XP_014050138.1	PREDICTED: uncharacterized protein LOC106602182 [Salmo salar]	565	AKP40998.1	ORF2 protein [Salmo salar]	650.588	XP_014050138.1	PREDICTED: uncharacterized protein LOC106602182 [Salmo salar]
Int_0000464	324	0	XP_014050138.1	PREDICTED: uncharacterized protein LOC106602182 [Salmo salar]	100	XP_014050108.1	PREDICTED: ladderlectin-like [Salmo salar]	100	XP_014050138.1	PREDICTED: uncharacterized protein LOC106602182 [Salmo salar]	565	AKP40998.1	ORF2 protein [Salmo salar]	650.588	XP_014050138.1	PREDICTED: uncharacterized protein LOC106602182 [Salmo salar]
Int_0000465	885	1.41559e-57	XP_014050441.1	PREDICTED: SH3 domain-containing protein 19-like [Salmo salar]	100	XP_014050441.1	PREDICTED: SH3 domain-containing protein 19-like [Salmo salar]	100	XP_014050441.1	PREDICTED: SH3 domain-containing protein 19-like [Salmo salar]	175	AKP40998.1	ORF2 protein [Salmo salar]	207.223	XP_014050441.1	PREDICTED: SH3 domain-containing protein 19-like [Salmo salar]
Int_0000466	885	1.41713e-57	XP_014050441.1	PREDICTED: SH3 domain-containing protein 19-like [Salmo salar]	100	XP_014050441.1	PREDICTED: SH3 domain-containing protein 19-like [Salmo salar]	100	XP_014050441.1	PREDICTED: SH3 domain-containing protein 19-like [Salmo salar]	175	AKP40998.1	ORF2 protein [Salmo salar]	207.223	XP_014050441.1	PREDICTED: SH3 domain-containing protein 19-like [Salmo salar]
Int_0000467	885	1.40769e-57	XP_014050441.1	PREDICTED: SH3 domain-containing protein 19-like [Salmo salar]	100	XP_014050441.1	PREDICTED: SH3 domain-containing protein 19-like [Salmo salar]	100	XP_014050441.1	PREDICTED: SH3 domain-containing protein 19-like [Salmo salar]	175	AKP40998.1	ORF2 protein [Salmo salar]	207.223	XP_014050441.1	PREDICTED: SH3 domain-containing protein 19-like [Salmo salar]
Int_0000468	885	1.40922e-57	XP_014050441.1	PREDICTED: SH3 domain-containing protein 19-like [Salmo salar]	100	XP_014050441.1	PREDICTED: SH3 domain-containing protein 19-like [Salmo salar]	100	XP_014050441.1	PREDICTED: SH3 domain-containing protein 19-like [Salmo salar]	175	AKP40998.1	ORF2 protein [Salmo salar]	207.223	XP_014050441.1	PREDICTED: SH3 domain-containing protein 19-like [Salmo salar]
Int_0000469	155	1.16998e-35	AKP40998.1	ORF2 protein [Salmo salar]	100	ACI66628.1	Fatty acid-binding protein, intestinal [Salmo salar]	100	ACI66628.1	Fatty acid-binding protein, intestinal [Salmo salar]	483	AKP40998.1	ORF2 protein [Salmo salar]	153.295	AKP40998.1	ORF2 protein [Salmo salar]
Int_0000470	189	1.16266e-35	AKP40998.1	ORF2 protein [Salmo salar]	100	ACI66628.1	Fatty acid-binding protein, intestinal [Salmo salar]	100	ACI66628.1	Fatty acid-binding protein, intestinal [Salmo salar]	483	AKP40998.1	ORF2 protein [Salmo salar]	153.295	AKP40998.1	ORF2 protein [Salmo salar]
Int_0000471	189	1.16651e-35	AKP40998.1	ORF2 protein [Salmo salar]	100	ACI66628.1	Fatty acid-binding protein, intestinal [Salmo salar]	100	ACI66628.1	Fatty acid-binding protein, intestinal [Salmo salar]	483	AKP40998.1	ORF2 protein [Salmo salar]	153.295	AKP40998.1	ORF2 protein [Salmo salar]
Int_0000472	187	1.16131e-35	AKP40998.1	ORF2 protein [Salmo salar]	100	ACI66628.1	Fatty acid-binding protein, intestinal [Salmo salar]	100	ACI66628.1	Fatty acid-binding protein, intestinal [Salmo salar]	483	AKP40998.1	ORF2 protein [Salmo salar]	153.295	AKP40998.1	ORF2 protein [Salmo salar]
Int_0000473	906	1.53219e-65	ACN11475.1	Transposable element Tcb1 transposase [Salmo salar]	100	ACN09818.1	40S ribosomal protein S14 [Salmo salar]	100	ACN09818.1	40S ribosomal protein S14 [Salmo salar]	271	XP_014057933.1	PREDICTED: involucrin-like [Salmo salar]	228.024	ACN11475.1	Transposable element Tcb1 transposase [Salmo salar]
Int_0000474	906	1.53621e-65	ACN11475.1	Transposable element Tcb1 transposase [Salmo salar]	100	ACN09818.1	40S ribosomal protein S14 [Salmo salar]	100	ACN09818.1	40S ribosomal protein S14 [Salmo salar]	271	XP_014057933.1	PREDICTED: involucrin-like [Salmo salar]	228.024	ACN11475.1	Transposable element Tcb1 transposase [Salmo salar]
Int_0000475	366	0	XP_014053610.1	PREDICTED: PWWP domain-containing protein 2A-like [Salmo salar]	100	XP_014053613.1	PREDICTED: cyclin-J-like [Salmo salar]	100	XP_014053610.1	PREDICTED: PWWP domain-containing protein 2A-like [Salmo salar]	360	XP_013992134.1	PREDICTED: PWWP domain-containing protein 2A isoform X2 [Salmo salar]	717.998	XP_014053610.1	PREDICTED: PWWP domain-containing protein 2A-like [Salmo salar]
Int_0000476	366	0	XP_014053610.1	PREDICTED: PWWP domain-containing protein 2A-like [Salmo salar]	100	XP_014053613.1	PREDICTED: cyclin-J-like [Salmo salar]	100	XP_014053610.1	PREDICTED: PWWP domain-containing protein 2A-like [Salmo salar]	360	XP_013992134.1	PREDICTED: PWWP domain-containing protein 2A isoform X2 [Salmo salar]	717.998	XP_014053610.1	PREDICTED: PWWP domain-containing protein 2A-like [Salmo salar]
Int_0000477	366	0	XP_014053610.1	PREDICTED: PWWP domain-containing protein 2A-like [Salmo salar]	100	XP_014053613.1	PREDICTED: cyclin-J-like [Salmo salar]	100	XP_014053610.1	PREDICTED: PWWP domain-containing protein 2A-like [Salmo salar]	360	XP_013992134.1	PREDICTED: PWWP domain-containing protein 2A isoform X2 [Salmo salar]	717.998	XP_014053610.1	PREDICTED: PWWP domain-containing protein 2A-like [Salmo salar]
Int_0000478	365	0	XP_014053610.1	PREDICTED: PWWP domain-containing protein 2A-like [Salmo salar]	100	XP_014053613.1	PREDICTED: cyclin-J-like [Salmo salar]	100	XP_014053610.1	PREDICTED: PWWP domain-containing protein 2A-like [Salmo salar]	360	XP_013992134.1	PREDICTED: PWWP domain-containing protein 2A isoform X2 [Salmo salar]	717.998	XP_014053610.1	PREDICTED: PWWP domain-containing protein 2A-like [Salmo salar]
Int_0000479	366	0	XP_014053610.1	PREDICTED: PWWP domain-containing protein 2A-like [Salmo salar]	100	XP_014053613.1	PREDICTED: cyclin-J-like [Salmo salar]	100	XP_014053610.1	PREDICTED: PWWP domain-containing protein 2A-like [Salmo salar]	360	XP_013992134.1	PREDICTED: PWWP domain-containing protein 2A isoform X2 [Salmo salar]	717.998	XP_014053610.1	PREDICTED: PWWP domain-containing protein 2A-like [Salmo salar]
Int_0000480	885	1.41603e-57	XP_014050441.1	PREDICTED: SH3 domain-containing protein 19-like [Salmo salar]	100	XP_014050441.1	PREDICTED: SH3 domain-containing protein 19-like [Salmo salar]	100	XP_014050441.1	PREDICTED: SH3 domain-containing protein 19-like [Salmo salar]	175	AKP40998.1	ORF2 protein [Salmo salar]	207.223	XP_014050441.1	PREDICTED: SH3 domain-containing protein 19-like [Salmo salar]
Int_0000481	869	1.41713e-57	XP_014050441.1	PREDICTED: SH3 domain-containing protein 19-like [Salmo salar]	100	XP_014050441.1	PREDICTED: SH3 domain-containing protein 19-like [Salmo salar]	100	XP_014050441.1	PREDICTED: SH3 domain-containing protein 19-like [Salmo salar]	175	AKP40998.1	ORF2 protein [Salmo salar]	207.223	XP_014050441.1	PREDICTED: SH3 domain-containing protein 19-like [Salmo salar]
Int_0000482	885	1.40988e-57	XP_014050441.1	PREDICTED: SH3 domain-containing protein 19-like [Salmo salar]	100	XP_014050441.1	PREDICTED: SH3 domain-containing protein 19-like [Salmo salar]	100	XP_014050441.1	PREDICTED: SH3 domain-containing protein 19-like [Salmo salar]	175	AKP40998.1	ORF2 protein [Salmo salar]	207.223	XP_014050441.1	PREDICTED: SH3 domain-containing protein 19-like [Salmo salar]
Int_0000483	869	1.40988e-57	XP_014050441.1	PREDICTED: SH3 domain-containing protein 19-like [Salmo salar]	100	XP_014050441.1	PREDICTED: SH3 domain-containing protein 19-like [Salmo salar]	100	XP_014050441.1	PREDICTED: SH3 domain-containing protein 19-like [Salmo salar]	175	AKP40998.1	ORF2 protein [Salmo salar]	207.223	XP_014050441.1	PREDICTED: SH3 domain-containing protein 19-like [Salmo salar]
Int_0000484	155	1.16844e-35	AKP40998.1	ORF2 protein [Salmo salar]	100	ACI66628.1	Fatty acid-binding protein, intestinal [Salmo salar]	100	ACI66628.1	Fatty acid-binding protein, intestinal [Salmo salar]	483	AKP40998.1	ORF2 protein [Salmo salar]	153.295	AKP40998.1	ORF2 protein [Salmo salar]
Int_0000485	189	1.16247e-35	AKP40998.1	ORF2 protein [Salmo salar]	100	ACI66628.1	Fatty acid-binding protein, intestinal [Salmo salar]	100	ACI66628.1	Fatty acid-binding protein, intestinal [Salmo salar]	483	AKP40998.1	ORF2 protein [Salmo salar]	153.295	AKP40998.1	ORF2 protein [Salmo salar]
Int_0000486	189	1.16651e-35	AKP40998.1	ORF2 protein [Salmo salar]	100	ACI66628.1	Fatty acid-binding protein, intestinal [Salmo salar]	100	ACI66628.1	Fatty acid-binding protein, intestinal [Salmo salar]	483	AKP40998.1	ORF2 protein [Salmo salar]	153.295	AKP40998.1	ORF2 protein [Salmo salar]
Int_0000487	187	1.16131e-35	AKP40998.1	ORF2 protein [Salmo salar]	100	ACI66628.1	Fatty acid-binding protein, intestinal [Salmo salar]	100	ACI66628.1	Fatty acid-binding protein, intestinal [Salmo salar]	483	AKP40998.1	ORF2 protein [Salmo salar]	153.295	AKP40998.1	ORF2 protein [Salmo salar]
Int_0000488	906	1.53172e-65	ACN11475.1	Transposable element Tcb1 transposase [Salmo salar]	100	ACN09818.1	40S ribosomal protein S14 [Salmo salar]	100	ACN09818.1	40S ribosomal protein S14 [Salmo salar]	271	XP_014057933.1	PREDICTED: involucrin-like [Salmo salar]	228.024	ACN11475.1	Transposable element Tcb1 transposase [Salmo salar]
Int_0000489	906	1.53574e-65	ACN11475.1	Transposable element Tcb1 transposase [Salmo salar]	100	ACN09818.1	40S ribosomal protein S14 [Salmo salar]	100	ACN09818.1	40S ribosomal protein S14 [Salmo salar]	271	XP_014057933.1	PREDICTED: involucrin-like [Salmo salar]	228.024	ACN11475.1	Transposable element Tcb1 transposase [Salmo salar]
Int_0000490	324	1.56394e-58	AKP40998.1	ORF2 protein [Salmo salar]	100	XP_014051682.1	PREDICTED: diamine acetyltransferase 1 [Salmo salar]	100	XP_014051682.1	PREDICTED: diamine acetyltransferase 1 [Salmo salar]	358	AKP40998.1	ORF2 protein [Salmo salar]	165.622	AKP40998.1	ORF2 protein [Salmo salar]
Int_0000491	366	0	XP_014053610.1	PREDICTED: PWWP domain-containing protein 2A-like [Salmo salar]	100	XP_014053613.1	PREDICTED: cyclin-J-like [Salmo salar]	100	XP_014053610.1	PREDICTED: PWWP domain-containing protein 2A-like [Salmo salar]	360	XP_013992134.1	PREDICTED: PWWP domain-containing protein 2A isoform X2 [Salmo salar]	717.998	XP_014053610.1	PREDICTED: PWWP domain-containing protein 2A-like [Salmo salar]
Int_0000492	366	0	XP_014053610.1	PREDICTED: PWWP domain-containing protein 2A-like [Salmo salar]	100	XP_014053613.1	PREDICTED: cyclin-J-like [Salmo salar]	100	XP_014053610.1	PREDICTED: PWWP domain-containing protein 2A-like [Salmo salar]	360	XP_013992134.1	PREDICTED: PWWP domain-containing protein 2A isoform X2 [Salmo salar]	717.998	XP_014053610.1	PREDICTED: PWWP domain-containing protein 2A-like [Salmo salar]
Int_0000493	366	0	XP_014053610.1	PREDICTED: PWWP domain-containing protein 2A-like [Salmo salar]	100	XP_014053613.1	PREDICTED: cyclin-J-like [Salmo salar]	100	XP_014053610.1	PREDICTED: PWWP domain-containing protein 2A-like [Salmo salar]	360	XP_013992134.1	PREDICTED: PWWP domain-containing protein 2A isoform X2 [Salmo salar]	717.998	XP_014053610.1	PREDICTED: PWWP domain-containing protein 2A-like [Salmo salar]
Int_0000494	365	0	XP_014053610.1	PREDICTED: PWWP domain-containing protein 2A-like [Salmo salar]	100	XP_014053613.1	PREDICTED: cyclin-J-like [Salmo salar]	100	XP_014053610.1	PREDICTED: PWWP domain-containing protein 2A-like [Salmo salar]	360	XP_013992134.1	PREDICTED: PWWP domain-containing protein 2A isoform X2 [Salmo salar]	717.998	XP_014053610.1	PREDICTED: PWWP domain-containing protein 2A-like [Salmo salar]
Int_0000495	366	0	XP_014053610.1	PREDICTED: PWWP domain-containing protein 2A-like [Salmo salar]	100	XP_014053613.1	PREDICTED: cyclin-J-like [Salmo salar]	100	XP_014053610.1	PREDICTED: PWWP domain-containing protein 2A-like [Salmo salar]	360	XP_013992134.1	PREDICTED: PWWP domain-containing protein 2A isoform X2 [Salmo salar]	717.998	XP_014053610.1	PREDICTED: PWWP domain-containing protein 2A-like [Salmo salar]
Int_0000692	401	9.55633e-105	ACI69264.1	Mannose-binding protein C precursor [Salmo salar]	100	ACN10214.1	Mannose-binding protein C precursor [Salmo salar]	100	ACI69264.1	Mannose-binding protein C precursor [Salmo salar]	285	XP_013996787.1	PREDICTED: uncharacterized protein LOC106569736 isoform X2 [Salmo salar]	335.495	ACI69264.1	Mannose-binding protein C precursor [Salmo salar]
Int_0000693	407	9.4109e-105	ACI69264.1	Mannose-binding protein C precursor [Salmo salar]	100	ACN10214.1	Mannose-binding protein C precursor [Salmo salar]	100	ACI69264.1	Mannose-binding protein C precursor [Salmo salar]	285	XP_013996787.1	PREDICTED: uncharacterized protein LOC106569736 isoform X2 [Salmo salar]	335.495	ACI69264.1	Mannose-binding protein C precursor [Salmo salar]
Int_0000694	227	0	ACI33546.1	RUN domain-containing protein 1 [Salmo salar]	100	XP_014058874.1	PREDICTED: RUN domain-containing protein 1-like [Salmo salar]	100	ACI33546.1	RUN domain-containing protein 1 [Salmo salar]	450	AKP40998.1	ORF2 protein [Salmo salar]	598.586	ACI33546.1	RUN domain-containing protein 1 [Salmo salar]
Int_0000695	227	0	ACI33546.1	RUN domain-containing protein 1 [Salmo salar]	100	XP_014058874.1	PREDICTED: RUN domain-containing protein 1-like [Salmo salar]	100	ACI33546.1	RUN domain-containing protein 1 [Salmo salar]	450	AKP40998.1	ORF2 protein [Salmo salar]	598.586	ACI33546.1	RUN domain-containing protein 1 [Salmo salar]
Int_0000696	220	0	ACI33546.1	RUN domain-containing protein 1 [Salmo salar]	100	XP_014058874.1	PREDICTED: RUN domain-containing protein 1-like [Salmo salar]	100	ACI33546.1	RUN domain-containing protein 1 [Salmo salar]	450	AKP40998.1	ORF2 protein [Salmo salar]	598.586	ACI33546.1	RUN domain-containing protein 1 [Salmo salar]
Int_0000697	378	1.40491e-135	ABV31711.1	transposase [Salmo salar]	100	ACH85333.1	ribosomal protein L3-like [Salmo salar]	100	ACH85333.1	ribosomal protein L3-like [Salmo salar]	166	ABV31711.1	transposase [Salmo salar]	327.791	ABV31711.1	transposase [Salmo salar]
Int_0000698	378	1.39893e-135	ABV31711.1	transposase [Salmo salar]	100	ACH85333.1	ribosomal protein L3-like [Salmo salar]	100	ACH85333.1	ribosomal protein L3-like [Salmo salar]	166	ABV31711.1	transposase [Salmo salar]	327.791	ABV31711.1	transposase [Salmo salar]
Int_0000699	378	1.39829e-135	ABV31711.1	transposase [Salmo salar]	100	ACH85333.1	ribosomal protein L3-like [Salmo salar]	100	ACH85333.1	ribosomal protein L3-like [Salmo salar]	166	ABV31711.1	transposase [Salmo salar]	327.791	ABV31711.1	transposase [Salmo salar]
Int_0000700	282	1.74184e-66	XP_014059350.1	PREDICTED: von Willebrand factor C domain-containing protein 2-like [Salmo salar]	100	XP_014059350.1	PREDICTED: von Willebrand factor C domain-containing protein 2-like [Salmo salar]	100	XP_014059350.1	PREDICTED: von Willebrand factor C domain-containing protein 2-like [Salmo salar]	229	ABV31711.1	transposase [Salmo salar]	229.18	XP_014059350.1	PREDICTED: von Willebrand factor C domain-containing protein 2-like [Salmo salar]
Int_0000701	282	1.74023e-66	XP_014059350.1	PREDICTED: von Willebrand factor C domain-containing protein 2-like [Salmo salar]	100	XP_014059350.1	PREDICTED: von Willebrand factor C domain-containing protein 2-like [Salmo salar]	100	XP_014059350.1	PREDICTED: von Willebrand factor C domain-containing protein 2-like [Salmo salar]	229	ABV31711.1	transposase [Salmo salar]	229.18	XP_014059350.1	PREDICTED: von Willebrand factor C domain-containing protein 2-like [Salmo salar]
Int_0000702	343	4.94685e-75	ABV31710.1	transposase [Salmo salar]	100	ACI66616.1	40S ribosomal protein S11 [Salmo salar]	100	ACI68815.1	40S ribosomal protein S11 [Salmo salar]	177	ABV31711.1	transposase [Salmo salar]	197.208	ABV31710.1	transposase [Salmo salar]
Int_0000703	196	2.38405e-125	ABV31711.1	transposase [Salmo salar]	100	ACH70808.1	ribosomal protein L19 [Salmo salar]	100	ACH70808.1	ribosomal protein L19 [Salmo salar]	329	ACH85309.1	transposase-like [Salmo salar]	401.364	ABV31711.1	transposase [Salmo salar]
Int_0000704	196	2.3848e-125	ABV31711.1	transposase [Salmo salar]	100	ACH70808.1	ribosomal protein L19 [Salmo salar]	100	ACH70808.1	ribosomal protein L19 [Salmo salar]	329	ACH85309.1	transposase-like [Salmo salar]	401.364	ABV31711.1	transposase [Salmo salar]
Int_0000705	182	2.38628e-125	ABV31711.1	transposase [Salmo salar]	100	ACH70808.1	ribosomal protein L19 [Salmo salar]	100	ACH70808.1	ribosomal protein L19 [Salmo salar]	329	ACH85309.1	transposase-like [Salmo salar]	401.364	ABV31711.1	transposase [Salmo salar]
Int_0000706	366	0	AKP40998.1	ORF2 protein [Salmo salar]	100	XP_014060891.1	PREDICTED: interferon-induced protein 44-like isoform X2 [Salmo salar]	100	XP_014060891.1	PREDICTED: interferon-induced protein 44-like isoform X2 [Salmo salar]	484	AKP40998.1	ORF2 protein [Salmo salar]	918.302	AKP40998.1	ORF2 protein [Salmo salar]
Int_0000707	364	0	AKP40998.1	ORF2 protein [Salmo salar]	100	XP_014060891.1	PREDICTED: interferon-induced protein 44-like isoform X2 [Salmo salar]	100	XP_014060891.1	PREDICTED: interferon-induced protein 44-like isoform X2 [Salmo salar]	484	AKP40998.1	ORF2 protein [Salmo salar]	918.302	AKP40998.1	ORF2 protein [Salmo salar]
Int_0000708	364	0	AKP40998.1	ORF2 protein [Salmo salar]	100	XP_014060891.1	PREDICTED: interferon-induced protein 44-like isoform X2 [Salmo salar]	100	XP_014060891.1	PREDICTED: interferon-induced protein 44-like isoform X2 [Salmo salar]	484	AKP40998.1	ORF2 protein [Salmo salar]	918.302	AKP40998.1	ORF2 protein [Salmo salar]
Int_0000709	367	0	AKP40998.1	ORF2 protein [Salmo salar]	100	XP_014060891.1	PREDICTED: interferon-induced protein 44-like isoform X2 [Salmo salar]	100	XP_014060891.1	PREDICTED: interferon-induced protein 44-like isoform X2 [Salmo salar]	484	AKP40998.1	ORF2 protein [Salmo salar]	918.302	AKP40998.1	ORF2 protein [Salmo salar]
Int_0000710	368	0	AKP40998.1	ORF2 protein [Salmo salar]	100	XP_014060891.1	PREDICTED: interferon-induced protein 44-like isoform X2 [Salmo salar]	100	XP_014060891.1	PREDICTED: interferon-induced protein 44-like isoform X2 [Salmo salar]	484	AKP40998.1	ORF2 protein [Salmo salar]	918.302	AKP40998.1	ORF2 protein [Salmo salar]
Int_0000711	360	0	AKP40998.1	ORF2 protein [Salmo salar]	100	XP_014060891.1	PREDICTED: interferon-induced protein 44-like isoform X2 [Salmo salar]	100	XP_014060891.1	PREDICTED: interferon-induced protein 44-like isoform X2 [Salmo salar]	484	AKP40998.1	ORF2 protein [Salmo salar]	918.302	AKP40998.1	ORF2 protein [Salmo salar]
Int_0000712	370	0	AKP40998.1	ORF2 protein [Salmo salar]	100	XP_014060891.1	PREDICTED: interferon-induced protein 44-like isoform X2 [Salmo salar]	100	XP_014060891.1	PREDICTED: interferon-induced protein 44-like isoform X2 [Salmo salar]	484	AKP40998.1	ORF2 protein [Salmo salar]	918.302	AKP40998.1	ORF2 protein [Salmo salar]
Int_0000713	374	0	AKP40998.1	ORF2 protein [Salmo salar]	100	XP_014060891.1	PREDICTED: interferon-induced protein 44-like isoform X2 [Salmo salar]	100	XP_014060891.1	PREDICTED: interferon-induced protein 44-like isoform X2 [Salmo salar]	484	AKP40998.1	ORF2 protein [Salmo salar]	918.302	AKP40998.1	ORF2 protein [Salmo salar]
Int_0000714	387	0	AKP40998.1	ORF2 protein [Salmo salar]	100	XP_014060891.1	PREDICTED: interferon-induced protein 44-like isoform X2 [Salmo salar]	100	XP_014060891.1	PREDICTED: interferon-induced protein 44-like isoform X2 [Salmo salar]	484	AKP40998.1	ORF2 protein [Salmo salar]	918.302	AKP40998.1	ORF2 protein [Salmo salar]
Int_0000715	371	0	AKP40998.1	ORF2 protein [Salmo salar]	100	XP_014060891.1	PREDICTED: interferon-induced protein 44-like isoform X2 [Salmo salar]	100	XP_014060891.1	PREDICTED: interferon-induced protein 44-like isoform X2 [Salmo salar]	484	AKP40998.1	ORF2 protein [Salmo salar]	918.302	AKP40998.1	ORF2 protein [Salmo salar]
Int_0000716	375	0	AKP40998.1	ORF2 protein [Salmo salar]	100	XP_014060891.1	PREDICTED: interferon-induced protein 44-like isoform X2 [Salmo salar]	100	XP_014060891.1	PREDICTED: interferon-induced protein 44-like isoform X2 [Salmo salar]	484	AKP40998.1	ORF2 protein [Salmo salar]	918.302	AKP40998.1	ORF2 protein [Salmo salar]
Int_0000717	373	0	AKP40998.1	ORF2 protein [Salmo salar]	100	XP_014060891.1	PREDICTED: interferon-induced protein 44-like isoform X2 [Salmo salar]	100	XP_014060891.1	PREDICTED: interferon-induced protein 44-like isoform X2 [Salmo salar]	484	AKP40998.1	ORF2 protein [Salmo salar]	918.302	AKP40998.1	ORF2 protein [Salmo salar]
Int_0000718	384	0	AKP40998.1	ORF2 protein [Salmo salar]	100	XP_014060891.1	PREDICTED: interferon-induced protein 44-like isoform X2 [Salmo salar]	100	XP_014060891.1	PREDICTED: interferon-induced protein 44-like isoform X2 [Salmo salar]	484	AKP40998.1	ORF2 protein [Salmo salar]	918.302	AKP40998.1	ORF2 protein [Salmo salar]
Int_0000719	300	0	ACI34169.1	Alpha-1,6-mannosyl-glycoprotein 2-beta-N-acetylglucosaminyltransferase [Salmo salar]	100	ACI34169.1	Alpha-1,6-mannosyl-glycoprotein 2-beta-N-acetylglucosaminyltransferase [Salmo salar]	100	ACI34169.1	Alpha-1,6-mannosyl-glycoprotein 2-beta-N-acetylglucosaminyltransferase [Salmo salar]	287	ACI34169.1	Alpha-1,6-mannosyl-glycoprotein 2-beta-N-acetylglucosaminyltransferase [Salmo salar]	569.311	ACI34169.1	Alpha-1,6-mannosyl-glycoprotein 2-beta-N-acetylglucosaminyltransferase [Salmo salar]
Int_0000720	300	0	XP_014061288.1	PREDICTED: alpha-1,6-mannosyl-glycoprotein 2-beta-N-acetylglucosaminyltransferase isoform X1 [Salmo salar]	100	XP_014061288.1	PREDICTED: alpha-1,6-mannosyl-glycoprotein 2-beta-N-acetylglucosaminyltransferase isoform X1 [Salmo salar]	100	XP_014061288.1	PREDICTED: alpha-1,6-mannosyl-glycoprotein 2-beta-N-acetylglucosaminyltransferase isoform X1 [Salmo salar]	382	XP_014061288.1	PREDICTED: alpha-1,6-mannosyl-glycoprotein 2-beta-N-acetylglucosaminyltransferase isoform X1 [Salmo salar]	775.778	XP_014061288.1	PREDICTED: alpha-1,6-mannosyl-glycoprotein 2-beta-N-acetylglucosaminyltransferase isoform X1 [Salmo salar]
Int_0000721	301	0	XP_014061288.1	PREDICTED: alpha-1,6-mannosyl-glycoprotein 2-beta-N-acetylglucosaminyltransferase isoform X1 [Salmo salar]	100	XP_014061288.1	PREDICTED: alpha-1,6-mannosyl-glycoprotein 2-beta-N-acetylglucosaminyltransferase isoform X1 [Salmo salar]	100	XP_014061288.1	PREDICTED: alpha-1,6-mannosyl-glycoprotein 2-beta-N-acetylglucosaminyltransferase isoform X1 [Salmo salar]	443	XP_014061288.1	PREDICTED: alpha-1,6-mannosyl-glycoprotein 2-beta-N-acetylglucosaminyltransferase isoform X1 [Salmo salar]	901.353	XP_014061288.1	PREDICTED: alpha-1,6-mannosyl-glycoprotein 2-beta-N-acetylglucosaminyltransferase isoform X1 [Salmo salar]
Int_0000722	905	2.24334e-42	ABV31710.1	transposase [Salmo salar]	100	XP_014061298.1	PREDICTED: ribonuclease H1-like isoform X1 [Salmo salar]	100	XP_014061298.1	PREDICTED: ribonuclease H1-like isoform X1 [Salmo salar]	177	XP_014037959.1	PREDICTED: uncharacterized protein LOC106591269 isoform X1 [Salmo salar]	159.073	ACJ02102.1	SPATA5 [Salmo salar]
Int_0000723	905	2.24232e-42	ABV31710.1	transposase [Salmo salar]	100	XP_014061298.1	PREDICTED: ribonuclease H1-like isoform X1 [Salmo salar]	100	XP_014061298.1	PREDICTED: ribonuclease H1-like isoform X1 [Salmo salar]	177	XP_014037959.1	PREDICTED: uncharacterized protein LOC106591269 isoform X1 [Salmo salar]	159.073	ACJ02102.1	SPATA5 [Salmo salar]
Int_0000724	892	2.24912e-42	ABV31710.1	transposase [Salmo salar]	100	XP_014061298.1	PREDICTED: ribonuclease H1-like isoform X1 [Salmo salar]	100	XP_014061298.1	PREDICTED: ribonuclease H1-like isoform X1 [Salmo salar]	177	XP_014037959.1	PREDICTED: uncharacterized protein LOC106591269 isoform X1 [Salmo salar]	159.073	ACJ02102.1	SPATA5 [Salmo salar]
Int_0000725	226	9.77913e-80	ABV31710.1	transposase [Salmo salar]	100	ACN10560.1	Transposable element Tc1 transposase [Salmo salar]	100	ACN10560.1	Transposable element Tc1 transposase [Salmo salar]	285	XP_014012344.1	PREDICTED: uncharacterized protein LOC106578222 isoform X1 [Salmo salar]	271.166	ABV31710.1	transposase [Salmo salar]
Int_0000726	401	9.56631e-105	ACI69264.1	Mannose-binding protein C precursor [Salmo salar]	100	ACN10214.1	Mannose-binding protein C precursor [Salmo salar]	100	ACI69264.1	Mannose-binding protein C precursor [Salmo salar]	285	XP_013996787.1	PREDICTED: uncharacterized protein LOC106569736 isoform X2 [Salmo salar]	335.495	ACI69264.1	Mannose-binding protein C precursor [Salmo salar]
Int_0000727	407	9.43656e-105	ACI69264.1	Mannose-binding protein C precursor [Salmo salar]	100	ACN10214.1	Mannose-binding protein C precursor [Salmo salar]	100	ACI69264.1	Mannose-binding protein C precursor [Salmo salar]	285	XP_013996787.1	PREDICTED: uncharacterized protein LOC106569736 isoform X2 [Salmo salar]	335.495	ACI69264.1	Mannose-binding protein C precursor [Salmo salar]
Int_0000728	551	9.42943e-105	ACI69264.1	Mannose-binding protein C precursor [Salmo salar]	100	ACN10214.1	Mannose-binding protein C precursor [Salmo salar]	100	ACI69264.1	Mannose-binding protein C precursor [Salmo salar]	342	XP_013996730.1	PREDICTED: uncharacterized protein LOC106569691 [Salmo salar]	335.495	ACI69264.1	Mannose-binding protein C precursor [Salmo salar]
Int_0000729	580	9.40662e-105	ACI69264.1	Mannose-binding protein C precursor [Salmo salar]	100	ACN10214.1	Mannose-binding protein C precursor [Salmo salar]	100	ACI69264.1	Mannose-binding protein C precursor [Salmo salar]	342	XP_013996730.1	PREDICTED: uncharacterized protein LOC106569691 [Salmo salar]	335.495	ACI69264.1	Mannose-binding protein C precursor [Salmo salar]
Int_0000730	227	0	ACI33546.1	RUN domain-containing protein 1 [Salmo salar]	100	XP_014058874.1	PREDICTED: RUN domain-containing protein 1-like [Salmo salar]	100	ACI33546.1	RUN domain-containing protein 1 [Salmo salar]	450	AKP40998.1	ORF2 protein [Salmo salar]	598.586	ACI33546.1	RUN domain-containing protein 1 [Salmo salar]
Int_0000731	227	0	ACI33546.1	RUN domain-containing protein 1 [Salmo salar]	100	XP_014058874.1	PREDICTED: RUN domain-containing protein 1-like [Salmo salar]	100	ACI33546.1	RUN domain-containing protein 1 [Salmo salar]	450	AKP40998.1	ORF2 protein [Salmo salar]	598.586	ACI33546.1	RUN domain-containing protein 1 [Salmo salar]
Int_0000732	220	0	ACI33546.1	RUN domain-containing protein 1 [Salmo salar]	100	XP_014058874.1	PREDICTED: RUN domain-containing protein 1-like [Salmo salar]	100	ACI33546.1	RUN domain-containing protein 1 [Salmo salar]	450	AKP40998.1	ORF2 protein [Salmo salar]	598.586	ACI33546.1	RUN domain-containing protein 1 [Salmo salar]
Int_0000733	379	1.39893e-135	ABV31711.1	transposase [Salmo salar]	100	ACH85333.1	ribosomal protein L3-like [Salmo salar]	100	ACH85333.1	ribosomal protein L3-like [Salmo salar]	166	ABV31711.1	transposase [Salmo salar]	327.791	ABV31711.1	transposase [Salmo salar]
Int_0000734	378	1.39872e-135	ABV31711.1	transposase [Salmo salar]	100	ACH85333.1	ribosomal protein L3-like [Salmo salar]	100	ACH85333.1	ribosomal protein L3-like [Salmo salar]	166	ABV31711.1	transposase [Salmo salar]	327.791	ABV31711.1	transposase [Salmo salar]
Int_0000735	378	1.41088e-135	ABV31711.1	transposase [Salmo salar]	100	ACH85333.1	ribosomal protein L3-like [Salmo salar]	100	ACH85333.1	ribosomal protein L3-like [Salmo salar]	166	ABV31711.1	transposase [Salmo salar]	327.791	ABV31711.1	transposase [Salmo salar]
Int_0000736	282	1.7429e-66	XP_014059350.1	PREDICTED: von Willebrand factor C domain-containing protein 2-like [Salmo salar]	100	XP_014059350.1	PREDICTED: von Willebrand factor C domain-containing protein 2-like [Salmo salar]	100	XP_014059350.1	PREDICTED: von Willebrand factor C domain-containing protein 2-like [Salmo salar]	229	ABV31711.1	transposase [Salmo salar]	229.18	XP_014059350.1	PREDICTED: von Willebrand factor C domain-containing protein 2-like [Salmo salar]
Int_0000737	282	1.7421e-66	XP_014059350.1	PREDICTED: von Willebrand factor C domain-containing protein 2-like [Salmo salar]	100	XP_014059350.1	PREDICTED: von Willebrand factor C domain-containing protein 2-like [Salmo salar]	100	XP_014059350.1	PREDICTED: von Willebrand factor C domain-containing protein 2-like [Salmo salar]	229	ABV31711.1	transposase [Salmo salar]	229.18	XP_014059350.1	PREDICTED: von Willebrand factor C domain-containing protein 2-like [Salmo salar]
Int_0000738	343	4.94535e-75	ABV31710.1	transposase [Salmo salar]	100	ACI66616.1	40S ribosomal protein S11 [Salmo salar]	100	ACI68815.1	40S ribosomal protein S11 [Salmo salar]	177	ABV31711.1	transposase [Salmo salar]	197.208	ABV31710.1	transposase [Salmo salar]
Int_0000739	196	2.38591e-125	ABV31711.1	transposase [Salmo salar]	100	ACH70808.1	ribosomal protein L19 [Salmo salar]	100	ACH70808.1	ribosomal protein L19 [Salmo salar]	329	ACH85309.1	transposase-like [Salmo salar]	401.364	ABV31711.1	transposase [Salmo salar]
Int_0000740	196	2.38368e-125	ABV31711.1	transposase [Salmo salar]	100	ACH70808.1	ribosomal protein L19 [Salmo salar]	100	ACH70808.1	ribosomal protein L19 [Salmo salar]	329	ACH85309.1	transposase-like [Salmo salar]	401.364	ABV31711.1	transposase [Salmo salar]
Int_0000741	182	2.38331e-125	ABV31711.1	transposase [Salmo salar]	100	ACH70808.1	ribosomal protein L19 [Salmo salar]	100	ACH70808.1	ribosomal protein L19 [Salmo salar]	329	ACH85309.1	transposase-like [Salmo salar]	401.364	ABV31711.1	transposase [Salmo salar]
Int_0000742	366	0	AKP40998.1	ORF2 protein [Salmo salar]	100	XP_014060891.1	PREDICTED: interferon-induced protein 44-like isoform X2 [Salmo salar]	100	XP_014060891.1	PREDICTED: interferon-induced protein 44-like isoform X2 [Salmo salar]	484	AKP40998.1	ORF2 protein [Salmo salar]	918.302	AKP40998.1	ORF2 protein [Salmo salar]
Int_0000743	364	0	AKP40998.1	ORF2 protein [Salmo salar]	100	XP_014060891.1	PREDICTED: interferon-induced protein 44-like isoform X2 [Salmo salar]	100	XP_014060891.1	PREDICTED: interferon-induced protein 44-like isoform X2 [Salmo salar]	484	AKP40998.1	ORF2 protein [Salmo salar]	918.302	AKP40998.1	ORF2 protein [Salmo salar]
Int_0000744	364	0	AKP40998.1	ORF2 protein [Salmo salar]	100	XP_014060891.1	PREDICTED: interferon-induced protein 44-like isoform X2 [Salmo salar]	100	XP_014060891.1	PREDICTED: interferon-induced protein 44-like isoform X2 [Salmo salar]	484	AKP40998.1	ORF2 protein [Salmo salar]	918.302	AKP40998.1	ORF2 protein [Salmo salar]
Int_0000745	367	0	AKP40998.1	ORF2 protein [Salmo salar]	100	XP_014060891.1	PREDICTED: interferon-induced protein 44-like isoform X2 [Salmo salar]	100	XP_014060891.1	PREDICTED: interferon-induced protein 44-like isoform X2 [Salmo salar]	484	AKP40998.1	ORF2 protein [Salmo salar]	918.302	AKP40998.1	ORF2 protein [Salmo salar]
Int_0000746	368	0	AKP40998.1	ORF2 protein [Salmo salar]	100	XP_014060891.1	PREDICTED: interferon-induced protein 44-like isoform X2 [Salmo salar]	100	XP_014060891.1	PREDICTED: interferon-induced protein 44-like isoform X2 [Salmo salar]	484	AKP40998.1	ORF2 protein [Salmo salar]	918.302	AKP40998.1	ORF2 protein [Salmo salar]
Int_0000747	360	0	AKP40998.1	ORF2 protein [Salmo salar]	100	XP_014060891.1	PREDICTED: interferon-induced protein 44-like isoform X2 [Salmo salar]	100	XP_014060891.1	PREDICTED: interferon-induced protein 44-like isoform X2 [Salmo salar]	484	AKP40998.1	ORF2 protein [Salmo salar]	918.302	AKP40998.1	ORF2 protein [Salmo salar]
Int_0000748	370	0	AKP40998.1	ORF2 protein [Salmo salar]	100	XP_014060891.1	PREDICTED: interferon-induced protein 44-like isoform X2 [Salmo salar]	100	XP_014060891.1	PREDICTED: interferon-induced protein 44-like isoform X2 [Salmo salar]	484	AKP40998.1	ORF2 protein [Salmo salar]	918.302	AKP40998.1	ORF2 protein [Salmo salar]
Int_0000749	374	0	AKP40998.1	ORF2 protein [Salmo salar]	100	XP_014060891.1	PREDICTED: interferon-induced protein 44-like isoform X2 [Salmo salar]	100	XP_014060891.1	PREDICTED: interferon-induced protein 44-like isoform X2 [Salmo salar]	484	AKP40998.1	ORF2 protein [Salmo salar]	918.302	AKP40998.1	ORF2 protein [Salmo salar]
Int_0000750	388	0	AKP40998.1	ORF2 protein [Salmo salar]	100	XP_014060891.1	PREDICTED: interferon-induced protein 44-like isoform X2 [Salmo salar]	100	XP_014060891.1	PREDICTED: interferon-induced protein 44-like isoform X2 [Salmo salar]	484	AKP40998.1	ORF2 protein [Salmo salar]	918.302	AKP40998.1	ORF2 protein [Salmo salar]
Int_0000751	386	0	AKP40998.1	ORF2 protein [Salmo salar]	100	XP_014060891.1	PREDICTED: interferon-induced protein 44-like isoform X2 [Salmo salar]	100	XP_014060891.1	PREDICTED: interferon-induced protein 44-like isoform X2 [Salmo salar]	484	AKP40998.1	ORF2 protein [Salmo salar]	918.302	AKP40998.1	ORF2 protein [Salmo salar]
Int_0000752	300	0	ACI34169.1	Alpha-1,6-mannosyl-glycoprotein 2-beta-N-acetylglucosaminyltransferase [Salmo salar]	100	ACI34169.1	Alpha-1,6-mannosyl-glycoprotein 2-beta-N-acetylglucosaminyltransferase [Salmo salar]	100	ACI34169.1	Alpha-1,6-mannosyl-glycoprotein 2-beta-N-acetylglucosaminyltransferase [Salmo salar]	287	ACI34169.1	Alpha-1,6-mannosyl-glycoprotein 2-beta-N-acetylglucosaminyltransferase [Salmo salar]	569.311	ACI34169.1	Alpha-1,6-mannosyl-glycoprotein 2-beta-N-acetylglucosaminyltransferase [Salmo salar]
Int_0000753	300	0	XP_014061288.1	PREDICTED: alpha-1,6-mannosyl-glycoprotein 2-beta-N-acetylglucosaminyltransferase isoform X1 [Salmo salar]	100	XP_014061288.1	PREDICTED: alpha-1,6-mannosyl-glycoprotein 2-beta-N-acetylglucosaminyltransferase isoform X1 [Salmo salar]	100	XP_014061288.1	PREDICTED: alpha-1,6-mannosyl-glycoprotein 2-beta-N-acetylglucosaminyltransferase isoform X1 [Salmo salar]	386	XP_014061288.1	PREDICTED: alpha-1,6-mannosyl-glycoprotein 2-beta-N-acetylglucosaminyltransferase isoform X1 [Salmo salar]	782.711	XP_014061288.1	PREDICTED: alpha-1,6-mannosyl-glycoprotein 2-beta-N-acetylglucosaminyltransferase isoform X1 [Salmo salar]
Int_0000754	301	0	XP_014061288.1	PREDICTED: alpha-1,6-mannosyl-glycoprotein 2-beta-N-acetylglucosaminyltransferase isoform X1 [Salmo salar]	100	XP_014061288.1	PREDICTED: alpha-1,6-mannosyl-glycoprotein 2-beta-N-acetylglucosaminyltransferase isoform X1 [Salmo salar]	100	XP_014061288.1	PREDICTED: alpha-1,6-mannosyl-glycoprotein 2-beta-N-acetylglucosaminyltransferase isoform X1 [Salmo salar]	443	XP_014061288.1	PREDICTED: alpha-1,6-mannosyl-glycoprotein 2-beta-N-acetylglucosaminyltransferase isoform X1 [Salmo salar]	901.353	XP_014061288.1	PREDICTED: alpha-1,6-mannosyl-glycoprotein 2-beta-N-acetylglucosaminyltransferase isoform X1 [Salmo salar]
Int_0000755	898	2.24504e-42	ABV31710.1	transposase [Salmo salar]	100	XP_014061298.1	PREDICTED: ribonuclease H1-like isoform X1 [Salmo salar]	100	XP_014061298.1	PREDICTED: ribonuclease H1-like isoform X1 [Salmo salar]	177	XP_014037959.1	PREDICTED: uncharacterized protein LOC106591269 isoform X1 [Salmo salar]	159.073	ACJ02102.1	SPATA5 [Salmo salar]
Int_0000756	905	2.243e-42	ABV31710.1	transposase [Salmo salar]	100	XP_014061298.1	PREDICTED: ribonuclease H1-like isoform X1 [Salmo salar]	100	XP_014061298.1	PREDICTED: ribonuclease H1-like isoform X1 [Salmo salar]	177	XP_014037959.1	PREDICTED: uncharacterized protein LOC106591269 isoform X1 [Salmo salar]	159.073	ACJ02102.1	SPATA5 [Salmo salar]
Int_0000757	899	2.24878e-42	ABV31710.1	transposase [Salmo salar]	100	XP_014061298.1	PREDICTED: ribonuclease H1-like isoform X1 [Salmo salar]	100	XP_014061298.1	PREDICTED: ribonuclease H1-like isoform X1 [Salmo salar]	177	XP_014037959.1	PREDICTED: uncharacterized protein LOC106591269 isoform X1 [Salmo salar]	159.073	ACJ02102.1	SPATA5 [Salmo salar]
Int_0000758	225	9.77304e-80	ABV31710.1	transposase [Salmo salar]	100	ACN10560.1	Transposable element Tc1 transposase [Salmo salar]	100	ACN10560.1	Transposable element Tc1 transposase [Salmo salar]	285	XP_014012344.1	PREDICTED: uncharacterized protein LOC106578222 isoform X1 [Salmo salar]	271.166	ABV31710.1	transposase [Salmo salar]
Int_0001114	224	8.45505e-54	ACN11500.1	Transposable element Tcb1 transposase [Salmo salar]	100	XP_014064585.1	PREDICTED: inactive ubiquitin carboxyl-terminal hydrolase 53-like isoform X4 [Salmo salar]	100	XP_014064585.1	PREDICTED: inactive ubiquitin carboxyl-terminal hydrolase 53-like isoform X4 [Salmo salar]	179	ABV31710.1	transposase [Salmo salar]	188.734	ACN11500.1	Transposable element Tcb1 transposase [Salmo salar]
Int_0001115	213	8.39807e-54	ACN11500.1	Transposable element Tcb1 transposase [Salmo salar]	98.3333	ACI66664.1	Fatty acid-binding protein, intestinal [Salmo salar]	98.3333	ACI66664.1	Fatty acid-binding protein, intestinal [Salmo salar]	179	ABV31710.1	transposase [Salmo salar]	188.734	ACN11500.1	Transposable element Tcb1 transposase [Salmo salar]
Int_0001116	224	8.42466e-54	ACN11500.1	Transposable element Tcb1 transposase [Salmo salar]	98.3333	ACI66664.1	Fatty acid-binding protein, intestinal [Salmo salar]	98.3333	ACI66664.1	Fatty acid-binding protein, intestinal [Salmo salar]	179	ABV31710.1	transposase [Salmo salar]	188.734	ACN11500.1	Transposable element Tcb1 transposase [Salmo salar]
Int_0001117	223	8.3892e-54	ACN11500.1	Transposable element Tcb1 transposase [Salmo salar]	98.3333	ACI66664.1	Fatty acid-binding protein, intestinal [Salmo salar]	98.3333	ACI66664.1	Fatty acid-binding protein, intestinal [Salmo salar]	179	ABV31710.1	transposase [Salmo salar]	188.734	ACN11500.1	Transposable element Tcb1 transposase [Salmo salar]
Int_0001118	919	9.09146e-151	ABV31711.1	transposase [Salmo salar]	100	AEB77804.1	olfactory receptor family C subfamily 4 member 10 [Salmo salar]	100	AEB77804.1	olfactory receptor family C subfamily 4 member 10 [Salmo salar]	275	AEB77813.1	olfactory receptor family C subfamily 2 member 2 [Salmo salar]	474.167	ABV31711.1	transposase [Salmo salar]
Int_0001119	916	9.0985e-151	ABV31711.1	transposase [Salmo salar]	100	AEB77804.1	olfactory receptor family C subfamily 4 member 10 [Salmo salar]	100	AEB77804.1	olfactory receptor family C subfamily 4 member 10 [Salmo salar]	275	AEB77813.1	olfactory receptor family C subfamily 2 member 2 [Salmo salar]	474.167	ABV31711.1	transposase [Salmo salar]
Int_0001120	912	9.1365e-151	ABV31711.1	transposase [Salmo salar]	100	AEB77804.1	olfactory receptor family C subfamily 4 member 10 [Salmo salar]	100	AEB77804.1	olfactory receptor family C subfamily 4 member 10 [Salmo salar]	275	AEB77813.1	olfactory receptor family C subfamily 2 member 2 [Salmo salar]	474.167	ABV31711.1	transposase [Salmo salar]
Int_0001121	910	9.14213e-151	ABV31711.1	transposase [Salmo salar]	100	AEB77804.1	olfactory receptor family C subfamily 4 member 10 [Salmo salar]	100	AEB77804.1	olfactory receptor family C subfamily 4 member 10 [Salmo salar]	275	AEB77813.1	olfactory receptor family C subfamily 2 member 2 [Salmo salar]	474.167	ABV31711.1	transposase [Salmo salar]
Int_0001122	1114	2.13168e-164	XP_014065183.1	PREDICTED: zinc finger protein OZF-like [Salmo salar]	100	XP_014065183.1	PREDICTED: zinc finger protein OZF-like [Salmo salar]	100	XP_014065183.1	PREDICTED: zinc finger protein OZF-like [Salmo salar]	415	XP_014013533.1	PREDICTED: zinc finger MYM-type protein 1-like isoform X1 [Salmo salar]	518.85	XP_014065183.1	PREDICTED: zinc finger protein OZF-like [Salmo salar]
Int_0001123	1114	2.13134e-164	XP_014065183.1	PREDICTED: zinc finger protein OZF-like [Salmo salar]	100	XP_014065183.1	PREDICTED: zinc finger protein OZF-like [Salmo salar]	100	XP_014065183.1	PREDICTED: zinc finger protein OZF-like [Salmo salar]	415	XP_014013533.1	PREDICTED: zinc finger MYM-type protein 1-like isoform X1 [Salmo salar]	518.85	XP_014065183.1	PREDICTED: zinc finger protein OZF-like [Salmo salar]
Int_0001124	1114	2.13034e-164	XP_014065183.1	PREDICTED: zinc finger protein OZF-like [Salmo salar]	100	XP_014065183.1	PREDICTED: zinc finger protein OZF-like [Salmo salar]	100	XP_014065183.1	PREDICTED: zinc finger protein OZF-like [Salmo salar]	415	XP_014013533.1	PREDICTED: zinc finger MYM-type protein 1-like isoform X1 [Salmo salar]	518.85	XP_014065183.1	PREDICTED: zinc finger protein OZF-like [Salmo salar]
Int_0001125	1114	2.13067e-164	XP_014065183.1	PREDICTED: zinc finger protein OZF-like [Salmo salar]	100	XP_014065183.1	PREDICTED: zinc finger protein OZF-like [Salmo salar]	100	XP_014065183.1	PREDICTED: zinc finger protein OZF-like [Salmo salar]	415	XP_014013533.1	PREDICTED: zinc finger MYM-type protein 1-like isoform X1 [Salmo salar]	518.85	XP_014065183.1	PREDICTED: zinc finger protein OZF-like [Salmo salar]
Int_0001126	1114	2.12766e-164	XP_014065183.1	PREDICTED: zinc finger protein OZF-like [Salmo salar]	100	XP_014065183.1	PREDICTED: zinc finger protein OZF-like [Salmo salar]	100	XP_014065183.1	PREDICTED: zinc finger protein OZF-like [Salmo salar]	415	XP_014013533.1	PREDICTED: zinc finger MYM-type protein 1-like isoform X1 [Salmo salar]	518.85	XP_014065183.1	PREDICTED: zinc finger protein OZF-like [Salmo salar]
Int_0001127	1114	2.12699e-164	XP_014065183.1	PREDICTED: zinc finger protein OZF-like [Salmo salar]	100	XP_014065183.1	PREDICTED: zinc finger protein OZF-like [Salmo salar]	100	XP_014065183.1	PREDICTED: zinc finger protein OZF-like [Salmo salar]	415	XP_014013533.1	PREDICTED: zinc finger MYM-type protein 1-like isoform X1 [Salmo salar]	518.85	XP_014065183.1	PREDICTED: zinc finger protein OZF-like [Salmo salar]
Int_0001128	1114	2.12599e-164	XP_014065183.1	PREDICTED: zinc finger protein OZF-like [Salmo salar]	100	XP_014065183.1	PREDICTED: zinc finger protein OZF-like [Salmo salar]	100	XP_014065183.1	PREDICTED: zinc finger protein OZF-like [Salmo salar]	415	XP_014013533.1	PREDICTED: zinc finger MYM-type protein 1-like isoform X1 [Salmo salar]	518.85	XP_014065183.1	PREDICTED: zinc finger protein OZF-like [Salmo salar]
Int_0001129	1114	2.13034e-164	XP_014065183.1	PREDICTED: zinc finger protein OZF-like [Salmo salar]	100	XP_014065183.1	PREDICTED: zinc finger protein OZF-like [Salmo salar]	100	XP_014065183.1	PREDICTED: zinc finger protein OZF-like [Salmo salar]	415	XP_014013533.1	PREDICTED: zinc finger MYM-type protein 1-like isoform X1 [Salmo salar]	518.85	XP_014065183.1	PREDICTED: zinc finger protein OZF-like [Salmo salar]
Int_0001130	225	1.49799e-154	AKP40998.1	ORF2 protein [Salmo salar]	100	XP_014065352.1	PREDICTED: von Willebrand factor A domain-containing protein 7-like [Salmo salar]	100	XP_014065352.1	PREDICTED: von Willebrand factor A domain-containing protein 7-like [Salmo salar]	292	XP_014056412.1	PREDICTED: uncharacterized protein LOC106605384, partial [Salmo salar]	379.793	AKP40998.1	ORF2 protein [Salmo salar]
Int_0001131	225	1.27876e-162	AKP40998.1	ORF2 protein [Salmo salar]	100	XP_014065352.1	PREDICTED: von Willebrand factor A domain-containing protein 7-like [Salmo salar]	100	XP_014065352.1	PREDICTED: von Willebrand factor A domain-containing protein 7-like [Salmo salar]	292	XP_014056412.1	PREDICTED: uncharacterized protein LOC106605384, partial [Salmo salar]	379.793	AKP40998.1	ORF2 protein [Salmo salar]
Int_0001132	224	8.45505e-54	ACN11500.1	Transposable element Tcb1 transposase [Salmo salar]	100	XP_014064585.1	PREDICTED: inactive ubiquitin carboxyl-terminal hydrolase 53-like isoform X4 [Salmo salar]	100	XP_014064585.1	PREDICTED: inactive ubiquitin carboxyl-terminal hydrolase 53-like isoform X4 [Salmo salar]	179	ABV31710.1	transposase [Salmo salar]	188.734	ACN11500.1	Transposable element Tcb1 transposase [Salmo salar]
Int_0001133	213	8.39807e-54	ACN11500.1	Transposable element Tcb1 transposase [Salmo salar]	98.3333	ACI66664.1	Fatty acid-binding protein, intestinal [Salmo salar]	98.3333	ACI66664.1	Fatty acid-binding protein, intestinal [Salmo salar]	179	ABV31710.1	transposase [Salmo salar]	188.734	ACN11500.1	Transposable element Tcb1 transposase [Salmo salar]
Int_0001134	224	8.42466e-54	ACN11500.1	Transposable element Tcb1 transposase [Salmo salar]	98.3333	ACI66664.1	Fatty acid-binding protein, intestinal [Salmo salar]	98.3333	ACI66664.1	Fatty acid-binding protein, intestinal [Salmo salar]	179	ABV31710.1	transposase [Salmo salar]	188.734	ACN11500.1	Transposable element Tcb1 transposase [Salmo salar]
Int_0001135	223	8.3892e-54	ACN11500.1	Transposable element Tcb1 transposase [Salmo salar]	98.3333	ACI66664.1	Fatty acid-binding protein, intestinal [Salmo salar]	98.3333	ACI66664.1	Fatty acid-binding protein, intestinal [Salmo salar]	179	ABV31710.1	transposase [Salmo salar]	188.734	ACN11500.1	Transposable element Tcb1 transposase [Salmo salar]
Int_0001136	919	9.09146e-151	ABV31711.1	transposase [Salmo salar]	100	AEB77804.1	olfactory receptor family C subfamily 4 member 10 [Salmo salar]	100	AEB77804.1	olfactory receptor family C subfamily 4 member 10 [Salmo salar]	275	AEB77813.1	olfactory receptor family C subfamily 2 member 2 [Salmo salar]	474.167	ABV31711.1	transposase [Salmo salar]
Int_0001137	916	9.09709e-151	ABV31711.1	transposase [Salmo salar]	100	AEB77804.1	olfactory receptor family C subfamily 4 member 10 [Salmo salar]	100	AEB77804.1	olfactory receptor family C subfamily 4 member 10 [Salmo salar]	275	AEB77813.1	olfactory receptor family C subfamily 2 member 2 [Salmo salar]	474.167	ABV31711.1	transposase [Salmo salar]
Int_0001138	912	9.14072e-151	ABV31711.1	transposase [Salmo salar]	100	AEB77804.1	olfactory receptor family C subfamily 4 member 10 [Salmo salar]	100	AEB77804.1	olfactory receptor family C subfamily 4 member 10 [Salmo salar]	275	AEB77813.1	olfactory receptor family C subfamily 2 member 2 [Salmo salar]	474.167	ABV31711.1	transposase [Salmo salar]
Int_0001139	910	9.14635e-151	ABV31711.1	transposase [Salmo salar]	100	AEB77804.1	olfactory receptor family C subfamily 4 member 10 [Salmo salar]	100	AEB77804.1	olfactory receptor family C subfamily 4 member 10 [Salmo salar]	275	AEB77813.1	olfactory receptor family C subfamily 2 member 2 [Salmo salar]	474.167	ABV31711.1	transposase [Salmo salar]
Int_0001140	471	9.0802e-151	ABV31711.1	transposase [Salmo salar]	100	AEB77804.1	olfactory receptor family C subfamily 4 member 10 [Salmo salar]	100	AEB77804.1	olfactory receptor family C subfamily 4 member 10 [Salmo salar]	275	AEB77813.1	olfactory receptor family C subfamily 2 member 2 [Salmo salar]	474.167	ABV31711.1	transposase [Salmo salar]
Int_0001141	1114	2.12498e-164	XP_014065183.1	PREDICTED: zinc finger protein OZF-like [Salmo salar]	100	XP_014065183.1	PREDICTED: zinc finger protein OZF-like [Salmo salar]	100	XP_014065183.1	PREDICTED: zinc finger protein OZF-like [Salmo salar]	415	XP_014013533.1	PREDICTED: zinc finger MYM-type protein 1-like isoform X1 [Salmo salar]	518.85	XP_014065183.1	PREDICTED: zinc finger protein OZF-like [Salmo salar]
Int_0001142	225	1.60726e-156	AKP40998.1	ORF2 protein [Salmo salar]	100	XP_014065352.1	PREDICTED: von Willebrand factor A domain-containing protein 7-like [Salmo salar]	100	XP_014065352.1	PREDICTED: von Willebrand factor A domain-containing protein 7-like [Salmo salar]	292	XP_014056412.1	PREDICTED: uncharacterized protein LOC106605384, partial [Salmo salar]	379.793	AKP40998.1	ORF2 protein [Salmo salar]
Int_0001143	225	2.5771e-165	AKP40998.1	ORF2 protein [Salmo salar]	100	XP_014065352.1	PREDICTED: von Willebrand factor A domain-containing protein 7-like [Salmo salar]	100	XP_014065352.1	PREDICTED: von Willebrand factor A domain-containing protein 7-like [Salmo salar]	292	XP_014056412.1	PREDICTED: uncharacterized protein LOC106605384, partial [Salmo salar]	379.793	AKP40998.1	ORF2 protein [Salmo salar]
Int_0001144	217	4.17089e-162	AKP40998.1	ORF2 protein [Salmo salar]	100	XP_014065352.1	PREDICTED: von Willebrand factor A domain-containing protein 7-like [Salmo salar]	100	XP_014065352.1	PREDICTED: von Willebrand factor A domain-containing protein 7-like [Salmo salar]	292	XP_014056412.1	PREDICTED: uncharacterized protein LOC106605384, partial [Salmo salar]	379.793	AKP40998.1	ORF2 protein [Salmo salar]
Int_0000604	278	3.44376e-136	ABV31711.1	transposase [Salmo salar]	100	XP_014062969.1	PREDICTED: bromodomain-containing protein 1-like, partial [Salmo salar]	100	XP_014062969.1	PREDICTED: bromodomain-containing protein 1-like, partial [Salmo salar]	340	ABV31710.1	transposase [Salmo salar]	346.28	ABV31711.1	transposase [Salmo salar]
Int_0000605	736	3.42325e-35	ACN10644.1	Legumain precursor [Salmo salar]	100	ACN10644.1	Legumain precursor [Salmo salar]	100	ACN10644.1	Legumain precursor [Salmo salar]	304	XP_013998742.1	PREDICTED: uncharacterized protein LOC106570770 [Salmo salar]	144.821	ACN10644.1	Legumain precursor [Salmo salar]
Int_0000606	736	3.4292e-35	ACN10644.1	Legumain precursor [Salmo salar]	100	ACN10644.1	Legumain precursor [Salmo salar]	100	ACN10644.1	Legumain precursor [Salmo salar]	304	XP_013998742.1	PREDICTED: uncharacterized protein LOC106570770 [Salmo salar]	144.821	ACN10644.1	Legumain precursor [Salmo salar]
Int_0000607	736	3.42866e-35	ACN10644.1	Legumain precursor [Salmo salar]	100	ACN10644.1	Legumain precursor [Salmo salar]	100	ACN10644.1	Legumain precursor [Salmo salar]	304	XP_013998742.1	PREDICTED: uncharacterized protein LOC106570770 [Salmo salar]	144.821	ACN10644.1	Legumain precursor [Salmo salar]
Int_0000608	737	3.46058e-35	ACN10644.1	Legumain precursor [Salmo salar]	100	ACN10644.1	Legumain precursor [Salmo salar]	100	ACN10644.1	Legumain precursor [Salmo salar]	304	XP_013998742.1	PREDICTED: uncharacterized protein LOC106570770 [Salmo salar]	144.821	ACN10644.1	Legumain precursor [Salmo salar]
Int_0000609	739	3.53308e-35	ACN10644.1	Legumain precursor [Salmo salar]	100	ACN10644.1	Legumain precursor [Salmo salar]	100	ACN10644.1	Legumain precursor [Salmo salar]	304	XP_013998742.1	PREDICTED: uncharacterized protein LOC106570770 [Salmo salar]	144.821	ACN10644.1	Legumain precursor [Salmo salar]
Int_0000610	429	2.81813e-115	ACN11489.1	ADP/ATP translocase 2 [Salmo salar]	100	ACN11489.1	ADP/ATP translocase 2 [Salmo salar]	100	ACN11489.1	ADP/ATP translocase 2 [Salmo salar]	226	ABV31710.1	transposase [Salmo salar]	312.768	ADM15907.1	ADP/ATP translocase 2 [Salmo salar]
Int_0000611	429	2.78632e-115	ACN11489.1	ADP/ATP translocase 2 [Salmo salar]	100	ACN11489.1	ADP/ATP translocase 2 [Salmo salar]	100	ACN11489.1	ADP/ATP translocase 2 [Salmo salar]	226	ABV31710.1	transposase [Salmo salar]	312.768	ADM15907.1	ADP/ATP translocase 2 [Salmo salar]
Int_0000612	424	2.79226e-115	ACN11489.1	ADP/ATP translocase 2 [Salmo salar]	100	ACN11489.1	ADP/ATP translocase 2 [Salmo salar]	100	ACN11489.1	ADP/ATP translocase 2 [Salmo salar]	226	ABV31710.1	transposase [Salmo salar]	312.768	ADM15907.1	ADP/ATP translocase 2 [Salmo salar]
Int_0000613	424	2.78165e-115	ACN11489.1	ADP/ATP translocase 2 [Salmo salar]	100	ACN11489.1	ADP/ATP translocase 2 [Salmo salar]	100	ACN11489.1	ADP/ATP translocase 2 [Salmo salar]	226	ABV31710.1	transposase [Salmo salar]	312.768	ADM15907.1	ADP/ATP translocase 2 [Salmo salar]
Int_0000614	428	2.79735e-115	ACN11489.1	ADP/ATP translocase 2 [Salmo salar]	100	ACN11489.1	ADP/ATP translocase 2 [Salmo salar]	100	ACN11489.1	ADP/ATP translocase 2 [Salmo salar]	226	ABV31710.1	transposase [Salmo salar]	312.768	ADM15907.1	ADP/ATP translocase 2 [Salmo salar]
Int_0000615	362	7.47931e-115	ACN11489.1	ADP/ATP translocase 2 [Salmo salar]	100	ACN11489.1	ADP/ATP translocase 2 [Salmo salar]	100	ACN11489.1	ADP/ATP translocase 2 [Salmo salar]	226	ABV31710.1	transposase [Salmo salar]	311.612	ACN10101.1	ADP/ATP translocase 2 [Salmo salar]
Int_0000616	366	7.47817e-115	ACN11489.1	ADP/ATP translocase 2 [Salmo salar]	100	ACN11489.1	ADP/ATP translocase 2 [Salmo salar]	100	ACN11489.1	ADP/ATP translocase 2 [Salmo salar]	226	ABV31710.1	transposase [Salmo salar]	311.612	ACN10101.1	ADP/ATP translocase 2 [Salmo salar]
Int_0000617	394	2.63962e-133	ACH85309.1	transposase-like [Salmo salar]	100	ACH70981.1	ribosomal protein L26 [Salmo salar]	100	ACH70981.1	ribosomal protein L26 [Salmo salar]	243	XP_013988342.1	PREDICTED: uncharacterized protein LOC106565584 [Salmo salar]	306.99	XP_013988342.1	PREDICTED: uncharacterized protein LOC106565584 [Salmo salar]
Int_0000618	393	2.64687e-133	ACH85309.1	transposase-like [Salmo salar]	100	ACH70981.1	ribosomal protein L26 [Salmo salar]	100	ACH70981.1	ribosomal protein L26 [Salmo salar]	243	XP_013988342.1	PREDICTED: uncharacterized protein LOC106565584 [Salmo salar]	306.99	XP_013988342.1	PREDICTED: uncharacterized protein LOC106565584 [Salmo salar]
Int_0000619	210	6.78504e-39	XP_014068817.1	PREDICTED: ES1 protein homolog, mitochondrial-like [Salmo salar]	100	XP_014068817.1	PREDICTED: ES1 protein homolog, mitochondrial-like [Salmo salar]	100	XP_014068817.1	PREDICTED: ES1 protein homolog, mitochondrial-like [Salmo salar]	162	XP_014041326.1	PREDICTED: DNA-directed RNA polymerase II subunit RPB1-like, partial [Salmo salar]	149.058	XP_014068817.1	PREDICTED: ES1 protein homolog, mitochondrial-like [Salmo salar]
Int_0000620	208	6.81204e-39	XP_014068817.1	PREDICTED: ES1 protein homolog, mitochondrial-like [Salmo salar]	100	XP_014068817.1	PREDICTED: ES1 protein homolog, mitochondrial-like [Salmo salar]	100	XP_014068817.1	PREDICTED: ES1 protein homolog, mitochondrial-like [Salmo salar]	162	XP_014041326.1	PREDICTED: DNA-directed RNA polymerase II subunit RPB1-like, partial [Salmo salar]	149.058	XP_014068817.1	PREDICTED: ES1 protein homolog, mitochondrial-like [Salmo salar]
Int_0000621	204	6.784e-39	XP_014068817.1	PREDICTED: ES1 protein homolog, mitochondrial-like [Salmo salar]	100	XP_014068817.1	PREDICTED: ES1 protein homolog, mitochondrial-like [Salmo salar]	100	XP_014068817.1	PREDICTED: ES1 protein homolog, mitochondrial-like [Salmo salar]	162	XP_014041326.1	PREDICTED: DNA-directed RNA polymerase II subunit RPB1-like, partial [Salmo salar]	149.058	XP_014068817.1	PREDICTED: ES1 protein homolog, mitochondrial-like [Salmo salar]
Int_0000622	204	6.784e-39	XP_014068817.1	PREDICTED: ES1 protein homolog, mitochondrial-like [Salmo salar]	100	XP_014068817.1	PREDICTED: ES1 protein homolog, mitochondrial-like [Salmo salar]	100	XP_014068817.1	PREDICTED: ES1 protein homolog, mitochondrial-like [Salmo salar]	162	XP_014041326.1	PREDICTED: DNA-directed RNA polymerase II subunit RPB1-like, partial [Salmo salar]	149.058	XP_014068817.1	PREDICTED: ES1 protein homolog, mitochondrial-like [Salmo salar]
Int_0000623	276	2.51867e-46	XP_014010384.1	PREDICTED: uncharacterized protein LOC106577141 [Salmo salar]	100	XP_014010384.1	PREDICTED: uncharacterized protein LOC106577141 [Salmo salar]	100	XP_014010384.1	PREDICTED: uncharacterized protein LOC106577141 [Salmo salar]	162	XP_014041326.1	PREDICTED: DNA-directed RNA polymerase II subunit RPB1-like, partial [Salmo salar]	181.03	XP_014010384.1	PREDICTED: uncharacterized protein LOC106577141 [Salmo salar]
Int_0000624	386	2.51544e-46	XP_014010384.1	PREDICTED: uncharacterized protein LOC106577141 [Salmo salar]	100	XP_014010384.1	PREDICTED: uncharacterized protein LOC106577141 [Salmo salar]	100	XP_014010384.1	PREDICTED: uncharacterized protein LOC106577141 [Salmo salar]	177	XP_013984543.1	PREDICTED: flocculation protein FLO11-like [Salmo salar]	181.03	XP_014010384.1	PREDICTED: uncharacterized protein LOC106577141 [Salmo salar]
Int_0000625	185	2.95948e-112	ABV31711.1	transposase [Salmo salar]	100	ACN09951.1	60S ribosomal protein L35a [Salmo salar]	100	AEB77813.1	olfactory receptor family C subfamily 2 member 2 [Salmo salar]	148	AKP40998.1	ORF2 protein [Salmo salar]	192.971	ABV31711.1	transposase [Salmo salar]
Int_0000626	143	6.44387e-24	AKP41003.1	hypothetical protein [Salmo salar]	100	XP_014036893.1	PREDICTED: ras-responsive element-binding protein 1-like isoform X2 [Salmo salar]	100	XP_014012410.1	PREDICTED: protein kinase C and casein kinase substrate in neurons protein 2-like [Salmo salar]	201	AKP40998.1	ORF2 protein [Salmo salar]	114.775	AKP40998.1	ORF2 protein [Salmo salar]
Int_0000627	218	1.01145e-58	ACX35599.1	reverse transcriptase-like protein [Salmo salar]	100	ACN09856.1	Phospholemman precursor [Salmo salar]	100	ACN10103.1	Transposable element Tcb1 transposase [Salmo salar]	213	ABV31710.1	transposase [Salmo salar]	210.305	ACX35599.1	reverse transcriptase-like protein [Salmo salar]
Int_0000628	513	6.381e-162	ACN60195.1	Retrotransposable element Tf2 155 kDa protein type 3, partial [Salmo salar]	100	ACI68193.1	Apolipoprotein A-I precursor [Salmo salar]	100	ACN60195.1	Retrotransposable element Tf2 155 kDa protein type 3, partial [Salmo salar]	415	XP_014026699.1	PREDICTED: LOW QUALITY PROTEIN: uncharacterized protein LOC106585230 [Salmo salar]	434.106	XP_014021308.1	PREDICTED: uncharacterized protein LOC106582599 [Salmo salar]
Int_0000629	514	6.41194e-162	ACN60195.1	Retrotransposable element Tf2 155 kDa protein type 3, partial [Salmo salar]	100	ACI68193.1	Apolipoprotein A-I precursor [Salmo salar]	100	ACN60195.1	Retrotransposable element Tf2 155 kDa protein type 3, partial [Salmo salar]	415	XP_014026699.1	PREDICTED: LOW QUALITY PROTEIN: uncharacterized protein LOC106585230 [Salmo salar]	432.18	XP_014021308.1	PREDICTED: uncharacterized protein LOC106582599 [Salmo salar]
Int_0000630	524	6.56859e-162	ACN60195.1	Retrotransposable element Tf2 155 kDa protein type 3, partial [Salmo salar]	100	ACI68193.1	Apolipoprotein A-I precursor [Salmo salar]	100	ACN60195.1	Retrotransposable element Tf2 155 kDa protein type 3, partial [Salmo salar]	415	XP_014026699.1	PREDICTED: LOW QUALITY PROTEIN: uncharacterized protein LOC106585230 [Salmo salar]	432.18	XP_014021308.1	PREDICTED: uncharacterized protein LOC106582599 [Salmo salar]
Int_0000631	525	6.45159e-162	ACN60195.1	Retrotransposable element Tf2 155 kDa protein type 3, partial [Salmo salar]	100	ACI68193.1	Apolipoprotein A-I precursor [Salmo salar]	100	ACN60195.1	Retrotransposable element Tf2 155 kDa protein type 3, partial [Salmo salar]	415	XP_014026699.1	PREDICTED: LOW QUALITY PROTEIN: uncharacterized protein LOC106585230 [Salmo salar]	432.18	XP_014021308.1	PREDICTED: uncharacterized protein LOC106582599 [Salmo salar]
Int_0000632	243	6.28864e-102	XP_014070232.1	PREDICTED: trafficking protein particle complex subunit 4 [Salmo salar]	100	XP_014070229.1	PREDICTED: glucose-6-phosphate translocase-like [Salmo salar]	100	XP_014070229.1	PREDICTED: glucose-6-phosphate translocase-like [Salmo salar]	212	ABV31711.1	transposase [Salmo salar]	235.728	ACI68348.1	40S ribosomal protein S25 [Salmo salar]
Int_0000633	278	6.30382e-102	XP_014070232.1	PREDICTED: trafficking protein particle complex subunit 4 [Salmo salar]	100	XP_014070229.1	PREDICTED: glucose-6-phosphate translocase-like [Salmo salar]	100	XP_014018339.1	PREDICTED: glucose-6-phosphate translocase-like isoform X2 [Salmo salar]	248	ABV31710.1	transposase [Salmo salar]	235.728	ACI68348.1	40S ribosomal protein S25 [Salmo salar]
Int_0000634	281	6.27346e-102	XP_014070232.1	PREDICTED: trafficking protein particle complex subunit 4 [Salmo salar]	100	XP_014070229.1	PREDICTED: glucose-6-phosphate translocase-like [Salmo salar]	100	XP_014018339.1	PREDICTED: glucose-6-phosphate translocase-like isoform X2 [Salmo salar]	248	ABV31710.1	transposase [Salmo salar]	235.728	ACI68348.1	40S ribosomal protein S25 [Salmo salar]
Int_0000635	199	9.46768e-98	ACI68988.1	Transposable element Tc1 transposase [Salmo salar]	100	XP_014070524.1	PREDICTED: retinol-binding protein 2-like isoform X3 [Salmo salar]	100	XP_013997078.1	PREDICTED: uncharacterized protein LOC106569888, partial [Salmo salar]	216	ABV31711.1	transposase [Salmo salar]	317.005	ACI68988.1	Transposable element Tc1 transposase [Salmo salar]
Int_0000636	278	3.44376e-136	ABV31711.1	transposase [Salmo salar]	100	XP_014062969.1	PREDICTED: bromodomain-containing protein 1-like, partial [Salmo salar]	100	XP_014062969.1	PREDICTED: bromodomain-containing protein 1-like, partial [Salmo salar]	340	ABV31710.1	transposase [Salmo salar]	346.28	ABV31711.1	transposase [Salmo salar]
Int_0000637	739	3.42541e-35	ACN10644.1	Legumain precursor [Salmo salar]	100	ACN10644.1	Legumain precursor [Salmo salar]	100	ACN10644.1	Legumain precursor [Salmo salar]	304	XP_013998742.1	PREDICTED: uncharacterized protein LOC106570770 [Salmo salar]	144.821	ACN10644.1	Legumain precursor [Salmo salar]
Int_0000638	739	3.42866e-35	ACN10644.1	Legumain precursor [Salmo salar]	100	ACN10644.1	Legumain precursor [Salmo salar]	100	ACN10644.1	Legumain precursor [Salmo salar]	304	XP_013998742.1	PREDICTED: uncharacterized protein LOC106570770 [Salmo salar]	144.821	ACN10644.1	Legumain precursor [Salmo salar]
Int_0000639	739	3.44056e-35	ACN10644.1	Legumain precursor [Salmo salar]	100	ACN10644.1	Legumain precursor [Salmo salar]	100	ACN10644.1	Legumain precursor [Salmo salar]	304	XP_013998742.1	PREDICTED: uncharacterized protein LOC106570770 [Salmo salar]	144.821	ACN10644.1	Legumain precursor [Salmo salar]
Int_0000640	745	3.6283e-35	ACN10644.1	Legumain precursor [Salmo salar]	100	ACN10644.1	Legumain precursor [Salmo salar]	100	ACN10644.1	Legumain precursor [Salmo salar]	304	XP_013998742.1	PREDICTED: uncharacterized protein LOC106570770 [Salmo salar]	144.821	ACN10644.1	Legumain precursor [Salmo salar]
Int_0000641	429	2.82365e-115	ACN11489.1	ADP/ATP translocase 2 [Salmo salar]	100	ACN11489.1	ADP/ATP translocase 2 [Salmo salar]	100	ACN11489.1	ADP/ATP translocase 2 [Salmo salar]	226	ABV31710.1	transposase [Salmo salar]	312.768	ADM15907.1	ADP/ATP translocase 2 [Salmo salar]
Int_0000642	429	2.78971e-115	ACN11489.1	ADP/ATP translocase 2 [Salmo salar]	100	ACN11489.1	ADP/ATP translocase 2 [Salmo salar]	100	ACN11489.1	ADP/ATP translocase 2 [Salmo salar]	226	ABV31710.1	transposase [Salmo salar]	312.768	ADM15907.1	ADP/ATP translocase 2 [Salmo salar]
Int_0000643	424	2.79862e-115	ACN11489.1	ADP/ATP translocase 2 [Salmo salar]	100	ACN11489.1	ADP/ATP translocase 2 [Salmo salar]	100	ACN11489.1	ADP/ATP translocase 2 [Salmo salar]	226	ABV31710.1	transposase [Salmo salar]	312.768	ADM15907.1	ADP/ATP translocase 2 [Salmo salar]
Int_0000644	425	2.81347e-115	ACN11489.1	ADP/ATP translocase 2 [Salmo salar]	100	ACN11489.1	ADP/ATP translocase 2 [Salmo salar]	100	ACN11489.1	ADP/ATP translocase 2 [Salmo salar]	226	ABV31710.1	transposase [Salmo salar]	312.768	ADM15907.1	ADP/ATP translocase 2 [Salmo salar]
Int_0000645	423	2.78292e-115	ACN11489.1	ADP/ATP translocase 2 [Salmo salar]	100	ACN11489.1	ADP/ATP translocase 2 [Salmo salar]	100	ACN11489.1	ADP/ATP translocase 2 [Salmo salar]	226	ABV31710.1	transposase [Salmo salar]	312.768	ADM15907.1	ADP/ATP translocase 2 [Salmo salar]
Int_0000646	219	0	ABV31710.1	transposase [Salmo salar]	100	ABW77485.1	tubulin tyrosine ligase-like family member 6a [Salmo salar]	100	ABW77485.1	tubulin tyrosine ligase-like family member 6a [Salmo salar]	336	ABV31710.1	transposase [Salmo salar]	610.912	ABV31710.1	transposase [Salmo salar]
Int_0000647	393	2.64002e-133	ACH85309.1	transposase-like [Salmo salar]	100	ACH70981.1	ribosomal protein L26 [Salmo salar]	100	ACH70981.1	ribosomal protein L26 [Salmo salar]	243	XP_013988342.1	PREDICTED: uncharacterized protein LOC106565584 [Salmo salar]	306.99	XP_013988342.1	PREDICTED: uncharacterized protein LOC106565584 [Salmo salar]
Int_0000648	393	2.63921e-133	ACH85309.1	transposase-like [Salmo salar]	100	ACH70981.1	ribosomal protein L26 [Salmo salar]	100	ACH70981.1	ribosomal protein L26 [Salmo salar]	243	XP_013988342.1	PREDICTED: uncharacterized protein LOC106565584 [Salmo salar]	306.99	XP_013988342.1	PREDICTED: uncharacterized protein LOC106565584 [Salmo salar]
Int_0000649	393	2.64646e-133	ACH85309.1	transposase-like [Salmo salar]	100	ACH70981.1	ribosomal protein L26 [Salmo salar]	100	ACH70981.1	ribosomal protein L26 [Salmo salar]	243	XP_013988342.1	PREDICTED: uncharacterized protein LOC106565584 [Salmo salar]	306.99	XP_013988342.1	PREDICTED: uncharacterized protein LOC106565584 [Salmo salar]
Int_0000650	185	2.95231e-112	ABV31711.1	transposase [Salmo salar]	100	ACN09951.1	60S ribosomal protein L35a [Salmo salar]	100	AEB77813.1	olfactory receptor family C subfamily 2 member 2 [Salmo salar]	148	AKP40998.1	ORF2 protein [Salmo salar]	192.971	ABV31711.1	transposase [Salmo salar]
Int_0000651	185	2.96532e-112	ABV31711.1	transposase [Salmo salar]	100	ACN09951.1	60S ribosomal protein L35a [Salmo salar]	100	AEB77813.1	olfactory receptor family C subfamily 2 member 2 [Salmo salar]	148	AKP40998.1	ORF2 protein [Salmo salar]	192.971	ABV31711.1	transposase [Salmo salar]
Int_0000652	143	6.44387e-24	AKP41003.1	hypothetical protein [Salmo salar]	100	XP_014036893.1	PREDICTED: ras-responsive element-binding protein 1-like isoform X2 [Salmo salar]	100	XP_014012410.1	PREDICTED: protein kinase C and casein kinase substrate in neurons protein 2-like [Salmo salar]	201	AKP40998.1	ORF2 protein [Salmo salar]	114.775	AKP40998.1	ORF2 protein [Salmo salar]
Int_0000653	218	1.01161e-58	ACX35599.1	reverse transcriptase-like protein [Salmo salar]	100	ACN09856.1	Phospholemman precursor [Salmo salar]	100	ACN10103.1	Transposable element Tcb1 transposase [Salmo salar]	213	ABV31710.1	transposase [Salmo salar]	210.305	ACX35599.1	reverse transcriptase-like protein [Salmo salar]
Int_0000654	513	6.381e-162	ACN60195.1	Retrotransposable element Tf2 155 kDa protein type 3, partial [Salmo salar]	100	ACI68193.1	Apolipoprotein A-I precursor [Salmo salar]	100	ACN60195.1	Retrotransposable element Tf2 155 kDa protein type 3, partial [Salmo salar]	415	XP_014026699.1	PREDICTED: LOW QUALITY PROTEIN: uncharacterized protein LOC106585230 [Salmo salar]	434.106	XP_014021308.1	PREDICTED: uncharacterized protein LOC106582599 [Salmo salar]
Int_0000655	514	6.41194e-162	ACN60195.1	Retrotransposable element Tf2 155 kDa protein type 3, partial [Salmo salar]	100	ACI68193.1	Apolipoprotein A-I precursor [Salmo salar]	100	ACN60195.1	Retrotransposable element Tf2 155 kDa protein type 3, partial [Salmo salar]	415	XP_014026699.1	PREDICTED: LOW QUALITY PROTEIN: uncharacterized protein LOC106585230 [Salmo salar]	432.18	XP_014021308.1	PREDICTED: uncharacterized protein LOC106582599 [Salmo salar]
Int_0000656	522	6.56086e-162	ACN60195.1	Retrotransposable element Tf2 155 kDa protein type 3, partial [Salmo salar]	100	ACI68193.1	Apolipoprotein A-I precursor [Salmo salar]	100	ACN60195.1	Retrotransposable element Tf2 155 kDa protein type 3, partial [Salmo salar]	415	XP_014026699.1	PREDICTED: LOW QUALITY PROTEIN: uncharacterized protein LOC106585230 [Salmo salar]	432.18	XP_014021308.1	PREDICTED: uncharacterized protein LOC106582599 [Salmo salar]
Int_0000657	525	6.36456e-162	ACN60195.1	Retrotransposable element Tf2 155 kDa protein type 3, partial [Salmo salar]	100	ACI68193.1	Apolipoprotein A-I precursor [Salmo salar]	100	ACN60195.1	Retrotransposable element Tf2 155 kDa protein type 3, partial [Salmo salar]	415	XP_014026699.1	PREDICTED: LOW QUALITY PROTEIN: uncharacterized protein LOC106585230 [Salmo salar]	432.18	XP_014021308.1	PREDICTED: uncharacterized protein LOC106582599 [Salmo salar]
Int_0000658	525	6.36649e-162	ACN60195.1	Retrotransposable element Tf2 155 kDa protein type 3, partial [Salmo salar]	100	ACI68193.1	Apolipoprotein A-I precursor [Salmo salar]	100	ACN60195.1	Retrotransposable element Tf2 155 kDa protein type 3, partial [Salmo salar]	415	XP_014026699.1	PREDICTED: LOW QUALITY PROTEIN: uncharacterized protein LOC106585230 [Salmo salar]	432.18	XP_014021308.1	PREDICTED: uncharacterized protein LOC106582599 [Salmo salar]
Int_0000659	525	6.44869e-162	ACN60195.1	Retrotransposable element Tf2 155 kDa protein type 3, partial [Salmo salar]	100	ACI68193.1	Apolipoprotein A-I precursor [Salmo salar]	100	ACN60195.1	Retrotransposable element Tf2 155 kDa protein type 3, partial [Salmo salar]	415	XP_014026699.1	PREDICTED: LOW QUALITY PROTEIN: uncharacterized protein LOC106585230 [Salmo salar]	432.18	XP_014021308.1	PREDICTED: uncharacterized protein LOC106582599 [Salmo salar]
Int_0000660	243	6.29054e-102	XP_014070232.1	PREDICTED: trafficking protein particle complex subunit 4 [Salmo salar]	100	XP_014070229.1	PREDICTED: glucose-6-phosphate translocase-like [Salmo salar]	100	XP_014070229.1	PREDICTED: glucose-6-phosphate translocase-like [Salmo salar]	212	ABV31711.1	transposase [Salmo salar]	235.728	ACI68348.1	40S ribosomal protein S25 [Salmo salar]
Int_0000661	278	6.30382e-102	XP_014070232.1	PREDICTED: trafficking protein particle complex subunit 4 [Salmo salar]	100	XP_014070229.1	PREDICTED: glucose-6-phosphate translocase-like [Salmo salar]	100	XP_014018339.1	PREDICTED: glucose-6-phosphate translocase-like isoform X2 [Salmo salar]	248	ABV31710.1	transposase [Salmo salar]	235.728	ACI68348.1	40S ribosomal protein S25 [Salmo salar]
Int_0000662	281	6.27441e-102	XP_014070232.1	PREDICTED: trafficking protein particle complex subunit 4 [Salmo salar]	100	XP_014070229.1	PREDICTED: glucose-6-phosphate translocase-like [Salmo salar]	100	XP_014018339.1	PREDICTED: glucose-6-phosphate translocase-like isoform X2 [Salmo salar]	248	ABV31710.1	transposase [Salmo salar]	235.728	ACI68348.1	40S ribosomal protein S25 [Salmo salar]
Int_0000663	199	9.4648e-98	ACI68988.1	Transposable element Tc1 transposase [Salmo salar]	100	XP_014070524.1	PREDICTED: retinol-binding protein 2-like isoform X3 [Salmo salar]	100	XP_013997078.1	PREDICTED: uncharacterized protein LOC106569888, partial [Salmo salar]	216	ABV31711.1	transposase [Salmo salar]	317.005	ACI68988.1	Transposable element Tc1 transposase [Salmo salar]
Int_0001272	855	0	XP_014019753.1	PREDICTED: uncharacterized protein LOC106581857 isoform X1 [Salmo salar]	100	XP_014019755.1	PREDICTED: villin-1 [Salmo salar]	100	XP_014019753.1	PREDICTED: uncharacterized protein LOC106581857 isoform X1 [Salmo salar]	407	XP_014019753.1	PREDICTED: uncharacterized protein LOC106581857 isoform X1 [Salmo salar]	755.747	XP_014019753.1	PREDICTED: uncharacterized protein LOC106581857 isoform X1 [Salmo salar]
Int_0001273	855	0	XP_014019753.1	PREDICTED: uncharacterized protein LOC106581857 isoform X1 [Salmo salar]	100	XP_014019755.1	PREDICTED: villin-1 [Salmo salar]	100	XP_014019753.1	PREDICTED: uncharacterized protein LOC106581857 isoform X1 [Salmo salar]	407	XP_014019753.1	PREDICTED: uncharacterized protein LOC106581857 isoform X1 [Salmo salar]	755.747	XP_014019753.1	PREDICTED: uncharacterized protein LOC106581857 isoform X1 [Salmo salar]
Int_0001274	272	5.74306e-72	XP_014029938.1	PREDICTED: 60S ribosomal protein L8-like [Salmo salar]	100	XP_014029938.1	PREDICTED: 60S ribosomal protein L8-like [Salmo salar]	100	XP_014029938.1	PREDICTED: 60S ribosomal protein L8-like [Salmo salar]	197	ACM09793.1	Transposable element Tc1 transposase [Salmo salar]	198.364	XP_014029938.1	PREDICTED: 60S ribosomal protein L8-like [Salmo salar]
Int_0001275	272	5.74915e-72	XP_014029938.1	PREDICTED: 60S ribosomal protein L8-like [Salmo salar]	100	XP_014029938.1	PREDICTED: 60S ribosomal protein L8-like [Salmo salar]	100	XP_014029938.1	PREDICTED: 60S ribosomal protein L8-like [Salmo salar]	197	ACM09793.1	Transposable element Tc1 transposase [Salmo salar]	198.364	XP_014029938.1	PREDICTED: 60S ribosomal protein L8-like [Salmo salar]
Int_0001276	268	5.78138e-72	XP_014029938.1	PREDICTED: 60S ribosomal protein L8-like [Salmo salar]	100	XP_014029938.1	PREDICTED: 60S ribosomal protein L8-like [Salmo salar]	100	XP_014029938.1	PREDICTED: 60S ribosomal protein L8-like [Salmo salar]	197	ACM09793.1	Transposable element Tc1 transposase [Salmo salar]	198.364	XP_014029938.1	PREDICTED: 60S ribosomal protein L8-like [Salmo salar]
Int_0001277	233	5.74219e-72	XP_014029938.1	PREDICTED: 60S ribosomal protein L8-like [Salmo salar]	100	XP_014029938.1	PREDICTED: 60S ribosomal protein L8-like [Salmo salar]	100	XP_014029938.1	PREDICTED: 60S ribosomal protein L8-like [Salmo salar]	157	XP_014056412.1	PREDICTED: uncharacterized protein LOC106605384, partial [Salmo salar]	198.364	XP_014029938.1	PREDICTED: 60S ribosomal protein L8-like [Salmo salar]
Int_0001278	249	5.74219e-72	XP_014029938.1	PREDICTED: 60S ribosomal protein L8-like [Salmo salar]	100	XP_014029938.1	PREDICTED: 60S ribosomal protein L8-like [Salmo salar]	100	XP_014029938.1	PREDICTED: 60S ribosomal protein L8-like [Salmo salar]	157	XP_014056412.1	PREDICTED: uncharacterized protein LOC106605384, partial [Salmo salar]	198.364	XP_014029938.1	PREDICTED: 60S ribosomal protein L8-like [Salmo salar]
Int_0001279	194	4.62478e-171	XP_014020017.1	PREDICTED: centrosomal protein of 97 kDa isoform X3 [Salmo salar]	100	XP_014020017.1	PREDICTED: centrosomal protein of 97 kDa isoform X3 [Salmo salar]	100	XP_014020017.1	PREDICTED: centrosomal protein of 97 kDa isoform X3 [Salmo salar]	287	XP_014020017.1	PREDICTED: centrosomal protein of 97 kDa isoform X3 [Salmo salar]	548.895	XP_014020016.1	PREDICTED: centrosomal protein of 97 kDa isoform X2 [Salmo salar]
Int_0001280	322	5.40028e-39	XP_013995530.1	PREDICTED: uncharacterized protein LOC106569078 [Salmo salar]	100	ACN09970.1	Acyl-CoA-binding protein [Salmo salar]	100	ACN09970.1	Acyl-CoA-binding protein [Salmo salar]	276	XP_014053635.1	PREDICTED: uncharacterized protein LOC106603920 isoform X3 [Salmo salar]	142.124	XP_013995530.1	PREDICTED: uncharacterized protein LOC106569078 [Salmo salar]
Int_0001281	293	5.3087e-39	XP_013995530.1	PREDICTED: uncharacterized protein LOC106569078 [Salmo salar]	100	ACN09970.1	Acyl-CoA-binding protein [Salmo salar]	100	ACN09970.1	Acyl-CoA-binding protein [Salmo salar]	276	XP_014053635.1	PREDICTED: uncharacterized protein LOC106603920 isoform X3 [Salmo salar]	142.124	XP_013995530.1	PREDICTED: uncharacterized protein LOC106569078 [Salmo salar]
Int_0001282	848	0	XP_014019753.1	PREDICTED: uncharacterized protein LOC106581857 isoform X1 [Salmo salar]	100	XP_014019755.1	PREDICTED: villin-1 [Salmo salar]	100	XP_014019753.1	PREDICTED: uncharacterized protein LOC106581857 isoform X1 [Salmo salar]	407	XP_014019753.1	PREDICTED: uncharacterized protein LOC106581857 isoform X1 [Salmo salar]	755.747	XP_014019753.1	PREDICTED: uncharacterized protein LOC106581857 isoform X1 [Salmo salar]
Int_0001283	855	0	XP_014019753.1	PREDICTED: uncharacterized protein LOC106581857 isoform X1 [Salmo salar]	100	XP_014019755.1	PREDICTED: villin-1 [Salmo salar]	100	XP_014019753.1	PREDICTED: uncharacterized protein LOC106581857 isoform X1 [Salmo salar]	407	XP_014019753.1	PREDICTED: uncharacterized protein LOC106581857 isoform X1 [Salmo salar]	755.747	XP_014019753.1	PREDICTED: uncharacterized protein LOC106581857 isoform X1 [Salmo salar]
Int_0001284	777	0	XP_014019753.1	PREDICTED: uncharacterized protein LOC106581857 isoform X1 [Salmo salar]	100	XP_014019755.1	PREDICTED: villin-1 [Salmo salar]	100	XP_014019753.1	PREDICTED: uncharacterized protein LOC106581857 isoform X1 [Salmo salar]	407	XP_014019753.1	PREDICTED: uncharacterized protein LOC106581857 isoform X1 [Salmo salar]	755.747	XP_014019753.1	PREDICTED: uncharacterized protein LOC106581857 isoform X1 [Salmo salar]
Int_0001285	758	0	XP_014019753.1	PREDICTED: uncharacterized protein LOC106581857 isoform X1 [Salmo salar]	100	XP_014019755.1	PREDICTED: villin-1 [Salmo salar]	100	XP_014019753.1	PREDICTED: uncharacterized protein LOC106581857 isoform X1 [Salmo salar]	407	XP_014019753.1	PREDICTED: uncharacterized protein LOC106581857 isoform X1 [Salmo salar]	755.747	XP_014019753.1	PREDICTED: uncharacterized protein LOC106581857 isoform X1 [Salmo salar]
Int_0001286	759	0	XP_014019753.1	PREDICTED: uncharacterized protein LOC106581857 isoform X1 [Salmo salar]	100	XP_014019755.1	PREDICTED: villin-1 [Salmo salar]	100	XP_014019753.1	PREDICTED: uncharacterized protein LOC106581857 isoform X1 [Salmo salar]	407	XP_014019753.1	PREDICTED: uncharacterized protein LOC106581857 isoform X1 [Salmo salar]	755.747	XP_014019753.1	PREDICTED: uncharacterized protein LOC106581857 isoform X1 [Salmo salar]
Int_0001287	767	0	XP_014019753.1	PREDICTED: uncharacterized protein LOC106581857 isoform X1 [Salmo salar]	100	XP_014019755.1	PREDICTED: villin-1 [Salmo salar]	100	XP_014019753.1	PREDICTED: uncharacterized protein LOC106581857 isoform X1 [Salmo salar]	407	XP_014019753.1	PREDICTED: uncharacterized protein LOC106581857 isoform X1 [Salmo salar]	755.747	XP_014019753.1	PREDICTED: uncharacterized protein LOC106581857 isoform X1 [Salmo salar]
Int_0001288	272	5.75525e-72	XP_014029938.1	PREDICTED: 60S ribosomal protein L8-like [Salmo salar]	100	XP_014029938.1	PREDICTED: 60S ribosomal protein L8-like [Salmo salar]	100	XP_014029938.1	PREDICTED: 60S ribosomal protein L8-like [Salmo salar]	197	ACM09793.1	Transposable element Tc1 transposase [Salmo salar]	198.364	XP_014029938.1	PREDICTED: 60S ribosomal protein L8-like [Salmo salar]
Int_0001289	272	5.75525e-72	XP_014029938.1	PREDICTED: 60S ribosomal protein L8-like [Salmo salar]	100	XP_014029938.1	PREDICTED: 60S ribosomal protein L8-like [Salmo salar]	100	XP_014029938.1	PREDICTED: 60S ribosomal protein L8-like [Salmo salar]	197	ACM09793.1	Transposable element Tc1 transposase [Salmo salar]	198.364	XP_014029938.1	PREDICTED: 60S ribosomal protein L8-like [Salmo salar]
Int_0001290	268	5.78312e-72	XP_014029938.1	PREDICTED: 60S ribosomal protein L8-like [Salmo salar]	100	XP_014029938.1	PREDICTED: 60S ribosomal protein L8-like [Salmo salar]	100	XP_014029938.1	PREDICTED: 60S ribosomal protein L8-like [Salmo salar]	197	ACM09793.1	Transposable element Tc1 transposase [Salmo salar]	198.364	XP_014029938.1	PREDICTED: 60S ribosomal protein L8-like [Salmo salar]
Int_0001291	233	5.74654e-72	XP_014029938.1	PREDICTED: 60S ribosomal protein L8-like [Salmo salar]	100	XP_014029938.1	PREDICTED: 60S ribosomal protein L8-like [Salmo salar]	100	XP_014029938.1	PREDICTED: 60S ribosomal protein L8-like [Salmo salar]	157	XP_014056412.1	PREDICTED: uncharacterized protein LOC106605384, partial [Salmo salar]	198.364	XP_014029938.1	PREDICTED: 60S ribosomal protein L8-like [Salmo salar]
Int_0001292	249	5.7448e-72	XP_014029938.1	PREDICTED: 60S ribosomal protein L8-like [Salmo salar]	100	XP_014029938.1	PREDICTED: 60S ribosomal protein L8-like [Salmo salar]	100	XP_014029938.1	PREDICTED: 60S ribosomal protein L8-like [Salmo salar]	157	XP_014056412.1	PREDICTED: uncharacterized protein LOC106605384, partial [Salmo salar]	198.364	XP_014029938.1	PREDICTED: 60S ribosomal protein L8-like [Salmo salar]
Int_0001293	194	4.63085e-171	XP_014020017.1	PREDICTED: centrosomal protein of 97 kDa isoform X3 [Salmo salar]	100	XP_014020017.1	PREDICTED: centrosomal protein of 97 kDa isoform X3 [Salmo salar]	100	XP_014020017.1	PREDICTED: centrosomal protein of 97 kDa isoform X3 [Salmo salar]	287	XP_014020017.1	PREDICTED: centrosomal protein of 97 kDa isoform X3 [Salmo salar]	548.895	XP_014020016.1	PREDICTED: centrosomal protein of 97 kDa isoform X2 [Salmo salar]
Int_0001294	325	5.30308e-39	XP_013995530.1	PREDICTED: uncharacterized protein LOC106569078 [Salmo salar]	100	ACN09970.1	Acyl-CoA-binding protein [Salmo salar]	100	ACN09970.1	Acyl-CoA-binding protein [Salmo salar]	276	XP_014053635.1	PREDICTED: uncharacterized protein LOC106603920 isoform X3 [Salmo salar]	142.124	XP_013995530.1	PREDICTED: uncharacterized protein LOC106569078 [Salmo salar]
Int_0001295	321	5.4043e-39	XP_013995530.1	PREDICTED: uncharacterized protein LOC106569078 [Salmo salar]	100	ACN09970.1	Acyl-CoA-binding protein [Salmo salar]	100	ACN09970.1	Acyl-CoA-binding protein [Salmo salar]	276	XP_014053635.1	PREDICTED: uncharacterized protein LOC106603920 isoform X3 [Salmo salar]	142.124	XP_013995530.1	PREDICTED: uncharacterized protein LOC106569078 [Salmo salar]
Int_0001296	291	5.31191e-39	XP_013995530.1	PREDICTED: uncharacterized protein LOC106569078 [Salmo salar]	100	ACN09970.1	Acyl-CoA-binding protein [Salmo salar]	100	ACN09970.1	Acyl-CoA-binding protein [Salmo salar]	276	XP_014053635.1	PREDICTED: uncharacterized protein LOC106603920 isoform X3 [Salmo salar]	142.124	XP_013995530.1	PREDICTED: uncharacterized protein LOC106569078 [Salmo salar]
Int_0000574	170	6.4905e-64	ABV31710.1	transposase [Salmo salar]	100	ACN10013.1	40S ribosomal protein S23 [Salmo salar]	100	ACN10013.1	40S ribosomal protein S23 [Salmo salar]	246	ABV31710.1	transposase [Salmo salar]	225.713	ABV31710.1	transposase [Salmo salar]
Int_0000575	170	6.49454e-64	ABV31710.1	transposase [Salmo salar]	100	ACN10013.1	40S ribosomal protein S23 [Salmo salar]	100	ACN10013.1	40S ribosomal protein S23 [Salmo salar]	246	ABV31710.1	transposase [Salmo salar]	225.713	ABV31710.1	transposase [Salmo salar]
Int_0000576	170	6.51476e-64	ABV31710.1	transposase [Salmo salar]	100	ACN10013.1	40S ribosomal protein S23 [Salmo salar]	100	ACN10013.1	40S ribosomal protein S23 [Salmo salar]	246	ABV31710.1	transposase [Salmo salar]	225.713	ABV31710.1	transposase [Salmo salar]
Int_0000577	169	9.0984e-57	XP_014021510.1	PREDICTED: diphosphoinositol polyphosphate phosphohydrolase 1 [Salmo salar]	100	ACI69812.1	40S ribosomal protein S10 [Salmo salar]	100	ACI69812.1	40S ribosomal protein S10 [Salmo salar]	222	ABV31711.1	transposase [Salmo salar]	198.749	XP_014021510.1	PREDICTED: diphosphoinositol polyphosphate phosphohydrolase 1 [Salmo salar]
Int_0000578	404	3.40266e-74	ABV31710.1	transposase [Salmo salar]	100	XP_014022615.1	PREDICTED: proliferation-associated protein 2G4-like [Salmo salar]	100	XP_014022615.1	PREDICTED: proliferation-associated protein 2G4-like [Salmo salar]	256	ABV31710.1	transposase [Salmo salar]	255.373	ABV31710.1	transposase [Salmo salar]
Int_0000579	236	4.3749e-129	ABV31711.1	transposase [Salmo salar]	100	XP_014023261.1	PREDICTED: acidic mammalian chitinase-like [Salmo salar]	100	XP_014023261.1	PREDICTED: acidic mammalian chitinase-like [Salmo salar]	275	AKP40998.1	ORF2 protein [Salmo salar]	328.561	ABV31711.1	transposase [Salmo salar]
Int_0000580	228	4.29419e-129	ABV31711.1	transposase [Salmo salar]	100	XP_014023261.1	PREDICTED: acidic mammalian chitinase-like [Salmo salar]	100	XP_014023261.1	PREDICTED: acidic mammalian chitinase-like [Salmo salar]	175	ABV31711.1	transposase [Salmo salar]	328.561	ABV31711.1	transposase [Salmo salar]
Int_0000581	228	4.29093e-129	ABV31711.1	transposase [Salmo salar]	100	XP_014056412.1	PREDICTED: uncharacterized protein LOC106605384, partial [Salmo salar]	100	XP_014056412.1	PREDICTED: uncharacterized protein LOC106605384, partial [Salmo salar]	175	ABV31711.1	transposase [Salmo salar]	328.561	ABV31711.1	transposase [Salmo salar]
Int_0000582	226	4.3046e-129	ABV31711.1	transposase [Salmo salar]	100	XP_014023261.1	PREDICTED: acidic mammalian chitinase-like [Salmo salar]	100	XP_014023261.1	PREDICTED: acidic mammalian chitinase-like [Salmo salar]	175	ABV31711.1	transposase [Salmo salar]	328.561	ABV31711.1	transposase [Salmo salar]
Int_0000583	223	4.29354e-129	ABV31711.1	transposase [Salmo salar]	100	XP_014023261.1	PREDICTED: acidic mammalian chitinase-like [Salmo salar]	100	XP_014023261.1	PREDICTED: acidic mammalian chitinase-like [Salmo salar]	175	ABV31711.1	transposase [Salmo salar]	328.561	ABV31711.1	transposase [Salmo salar]
Int_0000584	223	4.29289e-129	ABV31711.1	transposase [Salmo salar]	100	XP_014023261.1	PREDICTED: acidic mammalian chitinase-like [Salmo salar]	100	XP_014023261.1	PREDICTED: acidic mammalian chitinase-like [Salmo salar]	175	ABV31711.1	transposase [Salmo salar]	328.561	ABV31711.1	transposase [Salmo salar]
Int_0000585	229	4.3007e-129	ABV31711.1	transposase [Salmo salar]	100	XP_014023261.1	PREDICTED: acidic mammalian chitinase-like [Salmo salar]	100	XP_014023261.1	PREDICTED: acidic mammalian chitinase-like [Salmo salar]	175	ABV31711.1	transposase [Salmo salar]	328.561	ABV31711.1	transposase [Salmo salar]
Int_0000586	229	4.27791e-129	ABV31711.1	transposase [Salmo salar]	100	XP_014023261.1	PREDICTED: acidic mammalian chitinase-like [Salmo salar]	100	XP_014023261.1	PREDICTED: acidic mammalian chitinase-like [Salmo salar]	175	ABV31711.1	transposase [Salmo salar]	328.561	ABV31711.1	transposase [Salmo salar]
Int_0000587	229	4.32218e-129	ABV31711.1	transposase [Salmo salar]	100	XP_014023261.1	PREDICTED: acidic mammalian chitinase-like [Salmo salar]	100	XP_014023261.1	PREDICTED: acidic mammalian chitinase-like [Salmo salar]	175	ABV31711.1	transposase [Salmo salar]	328.561	ABV31711.1	transposase [Salmo salar]
Int_0000588	681	8.74638e-94	ACI68988.1	Transposable element Tc1 transposase [Salmo salar]	100	ACI66057.1	60S ribosomal protein L29 [Salmo salar]	100	XP_013997078.1	PREDICTED: uncharacterized protein LOC106569888, partial [Salmo salar]	367	AKP40998.1	ORF2 protein [Salmo salar]	268.47	XP_014071096.1	PREDICTED: uncharacterized protein LOC106613431, partial [Salmo salar]
Int_0000589	170	6.49353e-64	ABV31710.1	transposase [Salmo salar]	100	ACN10013.1	40S ribosomal protein S23 [Salmo salar]	100	ACN10013.1	40S ribosomal protein S23 [Salmo salar]	246	ABV31710.1	transposase [Salmo salar]	225.713	ABV31710.1	transposase [Salmo salar]
Int_0000590	170	6.49656e-64	ABV31710.1	transposase [Salmo salar]	100	ACN10013.1	40S ribosomal protein S23 [Salmo salar]	100	ACN10013.1	40S ribosomal protein S23 [Salmo salar]	246	ABV31710.1	transposase [Salmo salar]	225.713	ABV31710.1	transposase [Salmo salar]
Int_0000591	170	6.50869e-64	ABV31710.1	transposase [Salmo salar]	100	ACN10013.1	40S ribosomal protein S23 [Salmo salar]	100	ACN10013.1	40S ribosomal protein S23 [Salmo salar]	246	ABV31710.1	transposase [Salmo salar]	225.713	ABV31710.1	transposase [Salmo salar]
Int_0000592	169	9.10394e-57	XP_014021510.1	PREDICTED: diphosphoinositol polyphosphate phosphohydrolase 1 [Salmo salar]	100	ACI69812.1	40S ribosomal protein S10 [Salmo salar]	100	ACI69812.1	40S ribosomal protein S10 [Salmo salar]	222	ABV31711.1	transposase [Salmo salar]	198.749	XP_014021510.1	PREDICTED: diphosphoinositol polyphosphate phosphohydrolase 1 [Salmo salar]
Int_0000593	404	3.40266e-74	ABV31710.1	transposase [Salmo salar]	100	XP_014022615.1	PREDICTED: proliferation-associated protein 2G4-like [Salmo salar]	100	XP_014022615.1	PREDICTED: proliferation-associated protein 2G4-like [Salmo salar]	256	ABV31710.1	transposase [Salmo salar]	255.373	ABV31710.1	transposase [Salmo salar]
Int_0000594	236	4.37295e-129	ABV31711.1	transposase [Salmo salar]	100	XP_014023261.1	PREDICTED: acidic mammalian chitinase-like [Salmo salar]	100	XP_014023261.1	PREDICTED: acidic mammalian chitinase-like [Salmo salar]	275	AKP40998.1	ORF2 protein [Salmo salar]	328.561	ABV31711.1	transposase [Salmo salar]
Int_0000595	228	4.29419e-129	ABV31711.1	transposase [Salmo salar]	100	XP_014023261.1	PREDICTED: acidic mammalian chitinase-like [Salmo salar]	100	XP_014023261.1	PREDICTED: acidic mammalian chitinase-like [Salmo salar]	175	ABV31711.1	transposase [Salmo salar]	328.561	ABV31711.1	transposase [Salmo salar]
Int_0000596	228	4.29093e-129	ABV31711.1	transposase [Salmo salar]	100	XP_014056412.1	PREDICTED: uncharacterized protein LOC106605384, partial [Salmo salar]	100	XP_014056412.1	PREDICTED: uncharacterized protein LOC106605384, partial [Salmo salar]	175	ABV31711.1	transposase [Salmo salar]	328.561	ABV31711.1	transposase [Salmo salar]
Int_0000597	226	4.3046e-129	ABV31711.1	transposase [Salmo salar]	100	XP_014023261.1	PREDICTED: acidic mammalian chitinase-like [Salmo salar]	100	XP_014023261.1	PREDICTED: acidic mammalian chitinase-like [Salmo salar]	175	ABV31711.1	transposase [Salmo salar]	328.561	ABV31711.1	transposase [Salmo salar]
Int_0000598	223	4.29354e-129	ABV31711.1	transposase [Salmo salar]	100	XP_014023261.1	PREDICTED: acidic mammalian chitinase-like [Salmo salar]	100	XP_014023261.1	PREDICTED: acidic mammalian chitinase-like [Salmo salar]	175	ABV31711.1	transposase [Salmo salar]	328.561	ABV31711.1	transposase [Salmo salar]
Int_0000599	223	4.29289e-129	ABV31711.1	transposase [Salmo salar]	100	XP_014023261.1	PREDICTED: acidic mammalian chitinase-like [Salmo salar]	100	XP_014023261.1	PREDICTED: acidic mammalian chitinase-like [Salmo salar]	175	ABV31711.1	transposase [Salmo salar]	328.561	ABV31711.1	transposase [Salmo salar]
Int_0000600	229	4.3007e-129	ABV31711.1	transposase [Salmo salar]	100	XP_014023261.1	PREDICTED: acidic mammalian chitinase-like [Salmo salar]	100	XP_014023261.1	PREDICTED: acidic mammalian chitinase-like [Salmo salar]	175	ABV31711.1	transposase [Salmo salar]	328.561	ABV31711.1	transposase [Salmo salar]
Int_0000601	229	4.27791e-129	ABV31711.1	transposase [Salmo salar]	100	XP_014023261.1	PREDICTED: acidic mammalian chitinase-like [Salmo salar]	100	XP_014023261.1	PREDICTED: acidic mammalian chitinase-like [Salmo salar]	175	ABV31711.1	transposase [Salmo salar]	328.561	ABV31711.1	transposase [Salmo salar]
Int_0000602	229	4.32218e-129	ABV31711.1	transposase [Salmo salar]	100	XP_014023261.1	PREDICTED: acidic mammalian chitinase-like [Salmo salar]	100	XP_014023261.1	PREDICTED: acidic mammalian chitinase-like [Salmo salar]	175	ABV31711.1	transposase [Salmo salar]	328.561	ABV31711.1	transposase [Salmo salar]
Int_0000603	681	8.74638e-94	ACI68988.1	Transposable element Tc1 transposase [Salmo salar]	100	ACI66057.1	60S ribosomal protein L29 [Salmo salar]	100	XP_013997078.1	PREDICTED: uncharacterized protein LOC106569888, partial [Salmo salar]	367	AKP40998.1	ORF2 protein [Salmo salar]	268.47	XP_014071096.1	PREDICTED: uncharacterized protein LOC106613431, partial [Salmo salar]
Int_0000664	493	1.47298e-133	XP_014029316.1	PREDICTED: TBC1 domain family member 8-like isoform X1 [Salmo salar]	100	XP_014029316.1	PREDICTED: TBC1 domain family member 8-like isoform X1 [Salmo salar]	100	XP_014029316.1	PREDICTED: TBC1 domain family member 8-like isoform X1 [Salmo salar]	329	AKP40998.1	ORF2 protein [Salmo salar]	247.284	XP_014029316.1	PREDICTED: TBC1 domain family member 8-like isoform X1 [Salmo salar]
Int_0000665	314	5.55329e-89	XP_014029316.1	PREDICTED: TBC1 domain family member 8-like isoform X1 [Salmo salar]	100	XP_014029316.1	PREDICTED: TBC1 domain family member 8-like isoform X1 [Salmo salar]	100	XP_014029316.1	PREDICTED: TBC1 domain family member 8-like isoform X1 [Salmo salar]	329	AKP40998.1	ORF2 protein [Salmo salar]	222.246	ACI66028.1	Transposable element Tcb1 transposase [Salmo salar]
Int_0000666	294	5.05124e-91	XP_014029316.1	PREDICTED: TBC1 domain family member 8-like isoform X1 [Salmo salar]	100	XP_014029316.1	PREDICTED: TBC1 domain family member 8-like isoform X1 [Salmo salar]	100	XP_014029316.1	PREDICTED: TBC1 domain family member 8-like isoform X1 [Salmo salar]	329	AKP40998.1	ORF2 protein [Salmo salar]	222.246	ACI66028.1	Transposable element Tcb1 transposase [Salmo salar]
Int_0000667	319	1.20575e-96	XP_014029503.1	PREDICTED: voltage-dependent calcium channel gamma-like subunit isoform X2 [Salmo salar]	100	XP_014029503.1	PREDICTED: voltage-dependent calcium channel gamma-like subunit isoform X2 [Salmo salar]	100	XP_014029503.1	PREDICTED: voltage-dependent calcium channel gamma-like subunit isoform X2 [Salmo salar]	213	ACI66028.1	Transposable element Tcb1 transposase [Salmo salar]	314.694	XP_014029502.1	PREDICTED: voltage-dependent calcium channel gamma-like subunit isoform X1 [Salmo salar]
Int_0000668	521	1.219e-96	XP_014029503.1	PREDICTED: voltage-dependent calcium channel gamma-like subunit isoform X2 [Salmo salar]	100	XP_014029503.1	PREDICTED: voltage-dependent calcium channel gamma-like subunit isoform X2 [Salmo salar]	100	XP_014029503.1	PREDICTED: voltage-dependent calcium channel gamma-like subunit isoform X2 [Salmo salar]	213	ACI66028.1	Transposable element Tcb1 transposase [Salmo salar]	314.694	XP_014029502.1	PREDICTED: voltage-dependent calcium channel gamma-like subunit isoform X1 [Salmo salar]
Int_0000669	521	1.20667e-96	XP_014029503.1	PREDICTED: voltage-dependent calcium channel gamma-like subunit isoform X2 [Salmo salar]	100	XP_014029503.1	PREDICTED: voltage-dependent calcium channel gamma-like subunit isoform X2 [Salmo salar]	100	XP_014029503.1	PREDICTED: voltage-dependent calcium channel gamma-like subunit isoform X2 [Salmo salar]	213	ACI66028.1	Transposable element Tcb1 transposase [Salmo salar]	314.694	XP_014029502.1	PREDICTED: voltage-dependent calcium channel gamma-like subunit isoform X1 [Salmo salar]
Int_0000670	521	1.20648e-96	XP_014029503.1	PREDICTED: voltage-dependent calcium channel gamma-like subunit isoform X2 [Salmo salar]	100	XP_014029503.1	PREDICTED: voltage-dependent calcium channel gamma-like subunit isoform X2 [Salmo salar]	100	XP_014029503.1	PREDICTED: voltage-dependent calcium channel gamma-like subunit isoform X2 [Salmo salar]	213	ACI66028.1	Transposable element Tcb1 transposase [Salmo salar]	314.694	XP_014029502.1	PREDICTED: voltage-dependent calcium channel gamma-like subunit isoform X1 [Salmo salar]
Int_0000671	136	2.50219e-103	XP_014020017.1	PREDICTED: centrosomal protein of 97 kDa isoform X3 [Salmo salar]	100	ACI67654.1	Centrosomal protein of 97 kDa [Salmo salar]	100	XP_014020017.1	PREDICTED: centrosomal protein of 97 kDa isoform X3 [Salmo salar]	287	XP_014020017.1	PREDICTED: centrosomal protein of 97 kDa isoform X3 [Salmo salar]	352.829	XP_014020016.1	PREDICTED: centrosomal protein of 97 kDa isoform X2 [Salmo salar]
Int_0000672	655	9.16481e-84	XP_014013318.1	PREDICTED: uncharacterized protein LOC106578716 [Salmo salar]	100	XP_014029938.1	PREDICTED: 60S ribosomal protein L8-like [Salmo salar]	100	XP_014029938.1	PREDICTED: 60S ribosomal protein L8-like [Salmo salar]	264	ACN11475.1	Transposable element Tcb1 transposase [Salmo salar]	292.738	XP_014013318.1	PREDICTED: uncharacterized protein LOC106578716 [Salmo salar]
Int_0000673	908	0	ACO07304.1	TLR8-like protein [Salmo salar]	100	XP_014029966.1	PREDICTED: toll-like receptor 7 [Salmo salar]	100	XP_014029966.1	PREDICTED: toll-like receptor 7 [Salmo salar]	1072	ABV59002.1	toll-like receptor 9 [Salmo salar]	2117.43	ACO07304.1	TLR8-like protein [Salmo salar]
Int_0000674	908	0	ACO07304.1	TLR8-like protein [Salmo salar]	100	XP_014029966.1	PREDICTED: toll-like receptor 7 [Salmo salar]	100	XP_014029966.1	PREDICTED: toll-like receptor 7 [Salmo salar]	1072	ABV59002.1	toll-like receptor 9 [Salmo salar]	2117.43	ACO07304.1	TLR8-like protein [Salmo salar]
Int_0000675	920	0	ACO07304.1	TLR8-like protein [Salmo salar]	100	XP_014029966.1	PREDICTED: toll-like receptor 7 [Salmo salar]	100	XP_014029966.1	PREDICTED: toll-like receptor 7 [Salmo salar]	1072	ABV59002.1	toll-like receptor 9 [Salmo salar]	2117.43	ACO07304.1	TLR8-like protein [Salmo salar]
Int_0000676	1645	4.60333e-55	ABV31710.1	transposase [Salmo salar]	100	XP_014030131.1	PREDICTED: alpha-aspartyl dipeptidase isoform X3 [Salmo salar]	100	XP_014030131.1	PREDICTED: alpha-aspartyl dipeptidase isoform X3 [Salmo salar]	410	XP_014008005.1	PREDICTED: uncharacterized protein LOC106575838 isoform X1 [Salmo salar]	190.66	ACN11500.1	Transposable element Tcb1 transposase [Salmo salar]
Int_0000677	322	2.66085e-106	ACI68988.1	Transposable element Tc1 transposase [Salmo salar]	100	XP_014029127.1	PREDICTED: solute carrier family 15 member 2-like isoform X1 [Salmo salar]	100	XP_014029127.1	PREDICTED: solute carrier family 15 member 2-like isoform X1 [Salmo salar]	235	XP_014038939.1	PREDICTED: extensin-like [Salmo salar]	341.658	ACI68988.1	Transposable element Tc1 transposase [Salmo salar]
Int_0000678	321	2.66653e-106	ACI68988.1	Transposable element Tc1 transposase [Salmo salar]	100	XP_014029127.1	PREDICTED: solute carrier family 15 member 2-like isoform X1 [Salmo salar]	100	XP_014029127.1	PREDICTED: solute carrier family 15 member 2-like isoform X1 [Salmo salar]	235	XP_014038939.1	PREDICTED: extensin-like [Salmo salar]	341.658	ACI68988.1	Transposable element Tc1 transposase [Salmo salar]
Int_0000679	323	2.65396e-106	ACI68988.1	Transposable element Tc1 transposase [Salmo salar]	100	XP_014020861.1	PREDICTED: HSPB1-associated protein 1 [Salmo salar]	100	XP_014020861.1	PREDICTED: HSPB1-associated protein 1 [Salmo salar]	235	XP_014038939.1	PREDICTED: extensin-like [Salmo salar]	341.658	ACI68988.1	Transposable element Tc1 transposase [Salmo salar]
Int_0000680	493	1.47208e-133	XP_014029316.1	PREDICTED: TBC1 domain family member 8-like isoform X1 [Salmo salar]	100	XP_014029316.1	PREDICTED: TBC1 domain family member 8-like isoform X1 [Salmo salar]	100	XP_014029316.1	PREDICTED: TBC1 domain family member 8-like isoform X1 [Salmo salar]	329	AKP40998.1	ORF2 protein [Salmo salar]	247.284	XP_014029316.1	PREDICTED: TBC1 domain family member 8-like isoform X1 [Salmo salar]
Int_0000681	314	5.55413e-89	XP_014029316.1	PREDICTED: TBC1 domain family member 8-like isoform X1 [Salmo salar]	100	XP_014029316.1	PREDICTED: TBC1 domain family member 8-like isoform X1 [Salmo salar]	100	XP_014029316.1	PREDICTED: TBC1 domain family member 8-like isoform X1 [Salmo salar]	329	AKP40998.1	ORF2 protein [Salmo salar]	222.246	ACI66028.1	Transposable element Tcb1 transposase [Salmo salar]
Int_0000682	294	5.04894e-91	XP_014029316.1	PREDICTED: TBC1 domain family member 8-like isoform X1 [Salmo salar]	100	XP_014029316.1	PREDICTED: TBC1 domain family member 8-like isoform X1 [Salmo salar]	100	XP_014029316.1	PREDICTED: TBC1 domain family member 8-like isoform X1 [Salmo salar]	329	AKP40998.1	ORF2 protein [Salmo salar]	222.246	ACI66028.1	Transposable element Tcb1 transposase [Salmo salar]
Int_0000683	319	1.20704e-96	XP_014029503.1	PREDICTED: voltage-dependent calcium channel gamma-like subunit isoform X2 [Salmo salar]	100	XP_014029503.1	PREDICTED: voltage-dependent calcium channel gamma-like subunit isoform X2 [Salmo salar]	100	XP_014029503.1	PREDICTED: voltage-dependent calcium channel gamma-like subunit isoform X2 [Salmo salar]	213	ACI66028.1	Transposable element Tcb1 transposase [Salmo salar]	314.694	XP_014029502.1	PREDICTED: voltage-dependent calcium channel gamma-like subunit isoform X1 [Salmo salar]
Int_0000684	521	1.22084e-96	XP_014029503.1	PREDICTED: voltage-dependent calcium channel gamma-like subunit isoform X2 [Salmo salar]	100	XP_014029503.1	PREDICTED: voltage-dependent calcium channel gamma-like subunit isoform X2 [Salmo salar]	100	XP_014029503.1	PREDICTED: voltage-dependent calcium channel gamma-like subunit isoform X2 [Salmo salar]	213	ACI66028.1	Transposable element Tcb1 transposase [Salmo salar]	314.694	XP_014029502.1	PREDICTED: voltage-dependent calcium channel gamma-like subunit isoform X1 [Salmo salar]
Int_0000685	521	1.20814e-96	XP_014029503.1	PREDICTED: voltage-dependent calcium channel gamma-like subunit isoform X2 [Salmo salar]	100	XP_014029503.1	PREDICTED: voltage-dependent calcium channel gamma-like subunit isoform X2 [Salmo salar]	100	XP_014029503.1	PREDICTED: voltage-dependent calcium channel gamma-like subunit isoform X2 [Salmo salar]	213	ACI66028.1	Transposable element Tcb1 transposase [Salmo salar]	314.694	XP_014029502.1	PREDICTED: voltage-dependent calcium channel gamma-like subunit isoform X1 [Salmo salar]
Int_0000686	521	1.20593e-96	XP_014029503.1	PREDICTED: voltage-dependent calcium channel gamma-like subunit isoform X2 [Salmo salar]	100	XP_014029503.1	PREDICTED: voltage-dependent calcium channel gamma-like subunit isoform X2 [Salmo salar]	100	XP_014029503.1	PREDICTED: voltage-dependent calcium channel gamma-like subunit isoform X2 [Salmo salar]	213	ACI66028.1	Transposable element Tcb1 transposase [Salmo salar]	314.694	XP_014029502.1	PREDICTED: voltage-dependent calcium channel gamma-like subunit isoform X1 [Salmo salar]
Int_0000687	135	2.50096e-103	XP_014020017.1	PREDICTED: centrosomal protein of 97 kDa isoform X3 [Salmo salar]	100	ACI67654.1	Centrosomal protein of 97 kDa [Salmo salar]	100	XP_014020017.1	PREDICTED: centrosomal protein of 97 kDa isoform X3 [Salmo salar]	287	XP_014020017.1	PREDICTED: centrosomal protein of 97 kDa isoform X3 [Salmo salar]	352.829	XP_014020016.1	PREDICTED: centrosomal protein of 97 kDa isoform X2 [Salmo salar]
Int_0000688	655	9.13211e-84	XP_014013318.1	PREDICTED: uncharacterized protein LOC106578716 [Salmo salar]	100	XP_014029938.1	PREDICTED: 60S ribosomal protein L8-like [Salmo salar]	100	XP_014029938.1	PREDICTED: 60S ribosomal protein L8-like [Salmo salar]	264	ACN11475.1	Transposable element Tcb1 transposase [Salmo salar]	292.738	XP_014013318.1	PREDICTED: uncharacterized protein LOC106578716 [Salmo salar]
Int_0000689	655	9.17224e-84	XP_014013318.1	PREDICTED: uncharacterized protein LOC106578716 [Salmo salar]	100	XP_014029938.1	PREDICTED: 60S ribosomal protein L8-like [Salmo salar]	100	XP_014029938.1	PREDICTED: 60S ribosomal protein L8-like [Salmo salar]	264	ACN11475.1	Transposable element Tcb1 transposase [Salmo salar]	292.738	XP_014013318.1	PREDICTED: uncharacterized protein LOC106578716 [Salmo salar]
[truncated: 447 more rows]

## Sheet: Multi BLAST_gill
Query	Number of HSPs	Lowest E-value	Accession (E-value)	Description (E-value)	Greatest identity %	Accession (identity %)	Description (identity %)	Greatest positive %	Accession (positive %)	Description (positive %)	Greatest HSP length	Accession (HSP length)	Description (HSP length)	Greatest bit score	Accession (bit score)	Description (bit score)
[truncated: 472 more rows]

[truncated: 3 more sheets: RNA-Seq clusters gill, RNA-Seq clusters intestine, RNA-Seq Clusters head kidney]
