# Supplementary material for: Whole-Genome Transcript Expression Profiling Reveals Novel Insights into Transposon Genes and Non-Coding RNAs during Atlantic Salmon Seawater Adaptation
Source: Biology (Basel). 2021 Dec 21;11(1):1. doi: 10.3390/biology11010001 (PMC8772943; doi:10.3390/biology11010001)
Supplement: Supplementary file 1 [file biology-11-00001-s001.zip › Table S2_DEG transcripts annotation.xlsx]

## Sheet: Gill GSC
Chromosome	Region	Max group mean	Log₂ fold change	Fold change	P-value	FDR p-value	Bonferroni	Max group mean	Log₂ fold change	Fold change	P-value	FDR p-value	Bonferroni		Description
contig_0000363	1..1443	232.66	8.86	465.96	2.18e-108	1.29e-104	5.92e-103	0.51	-6.52	-91.79	0.13	0.28	1		PREDICTED: ubiquitin carboxyl-terminal hydrolase 34-like isoform X6 [Salmo salar]
contig_0057880	1..2461	5.58	7.89	236.69	6.71e-09	5.29e-07	0.00183	0.03	0.4	1.32	0.83	NaN	1		PREDICTED: piezo-type mechanosensitive ion channel component 2-like, partial [Salmo salar]
contig_0000928	1..1821	163.71	6.45	87.13	3.86e-205	1.6e-200	1.05e-199	2.49	0.54	1.45	0.05	0.14	1		PREDICTED: protein FAM111A-like [Salmo salar]
contig_0007930	1..731	160.17	5.88	58.71	1.88e-113	1.95e-109	5.1e-108	2.82	0.15	1.11	0.7	0.82	1		not available
contig_0007833	1..1041	4.4	5.39	42.06	1.11e-07	6.93e-06	0.03	0.1	-0.51	-1.42	0.77	NaN	1		PREDICTED: acidic leucine-rich nuclear phosphoprotein 32 family member B-like isoform X2 [Salmo salar]
contig_0079648	1..1131	2.11	5.37	41.27	0.000105	0.00261	1	0.5	3.44	10.83	0.02	NaN	1		PREDICTED: uncharacterized protein LOC106582492 isoform X2 [Salmo salar]
contig_0056139	1..506	4.59	5.33	40.13	0.000119	0.00289	1	0.37	1.89	3.7	0.24	NaN	1		PREDICTED: piezo-type mechanosensitive ion channel component 2-like, partial [Salmo salar]
contig_0024425	1..1575	13.14	5.32	40.07	3.04e-29	1.64e-26	8.26e-24	0.34	-1.27	-2.41	0.18	0.35	1		PREDICTED: olfactory receptor 11A1-like [Salmo salar]
contig_0055838	1..1686	1.97	4.93	30.5	1.4e-06	6.65e-05	0.38	0.07	0.42	1.34	0.77	NaN	1		PREDICTED: uncharacterized protein LOC106570150 [Salmo salar]
contig_0051053	1..1013	3.08	4.84	28.67	2.23e-06	9.91e-05	0.61	0.1	-0.51	-1.42	0.77	NaN	1		PREDICTED: C-type lectin lectoxin-Thr1-like [Salmo salar]
contig_0004696	1..1091	1.28	4.59	24.13	0.00102	0.02	1	0.05	-2.88	-7.38	0.52	NaN	1		PREDICTED: neurotrophin receptor-interacting factor 1-like isoform X1 [Salmo salar]
contig_0068784	1..14676	0.09	4.52	22.98	0.00124	0.02	1	0.04	3.59	12.02	0.01	NaN	1		PREDICTED: low-density lipoprotein receptor-related protein 2-like [Salmo salar]
contig_0136595	1..312	4.25	4.52	22.98	0.00124	0.02	1	0.61	1.89	3.7	0.24	NaN	1		Deoxyribonuclease gamma precursor [Salmo salar]
contig_0144238	1..450	2.95	4.52	22.98	0.00124	0.02	1	0.12	-2.88	-7.38	0.52	NaN	1		PREDICTED: contactin-3-like isoform X2 [Salmo salar]
contig_0099725	1..520	2.3	4.37	20.7	0.00185	0.02	1	1.09	3.44	10.83	0.02	NaN	1		PREDICTED: carboxylesterase 5A isoform X2 [Salmo salar]
contig_0085376	1..340	3.32	4.29	19.55	0.00229	0.03	1	1.3	3.08	8.45	0.04	NaN	1		PREDICTED: MOB kinase activator 3B isoform X2 [Salmo salar]
contig_0031976	1..331	3.21	4.2	18.41	0.00287	0.03	1	0.16	-2.88	-7.38	0.52	NaN	1		PREDICTED: serine--tRNA ligase, mitochondrial isoform X2 [Salmo salar]
contig_0068167	1..1301	0.82	4.2	18.41	0.00287	0.03	1	0.1	1.33	2.51	0.43	NaN	1		PREDICTED: GTPase IMAP family member 8-like [Salmo salar]
contig_0097636	1..209	5.08	4.2	18.41	0.00287	0.03	1	0.25	-2.88	-7.38	0.52	NaN	1		PREDICTED: neurogenic locus notch homolog protein 1-like isoform X1 [Salmo salar]
contig_0120351	1..867	1.22	4.2	18.41	0.00287	0.03	1	0.36	2.6	6.08	0.08	NaN	1		PREDICTED: multidrug and toxin extrusion protein 1-like isoform X4 [Salmo salar]
contig_0083415	1..1804	0.55	4.11	17.27	0.00361	0.04	1	0.03	-2.88	-7.38	0.52	NaN	1		PREDICTED: apoptosis-inducing factor 3-like isoform X1 [Salmo salar]
contig_0094245	1..866	1.15	4.11	17.27	0.00361	0.04	1	0.51	3.08	8.45	0.04	NaN	1		not available
contig_0157357	1..698	1.43	4.11	17.27	0.00361	0.04	1	0.09	0.4	1.32	0.83	NaN	1		PREDICTED: double-stranded RNA-specific adenosine deaminase-like [Salmo salar]
contig_0030708	1..2169	8.41	3.95	15.48	1.37e-32	9.27e-30	3.74e-27	1.8	1.86	3.62	2.1e-06	4.31e-05	0.56		PREDICTED: early growth response protein 2b-like isoform X1 [Salmo salar]
contig_0080218	1..1807	0.81	3.75	13.46	0.000343	0.00676	1	0.07	0.42	1.34	0.77	NaN	1		PREDICTED: uncharacterized protein K02A2.6-like [Salmo salar]
contig_0068354	1..1566	3.94	3.73	13.26	1.82e-12	2.52e-10	4.94e-07	0.3	-1.68	-3.2	0.13	NaN	1		PREDICTED: transposon Tf2-1 polyprotein [Salmo salar]
contig_0024095	1..818	1.54	3.54	11.63	0.000788	0.01	1	0.62	2.36	5.13	0.04	NaN	1		not available
contig_0104971	1..1454	1.69	3.54	11.67	3.84e-06	0.000158	1	0.15	-1.46	-2.75	0.35	NaN	1		PREDICTED: fibrinogen alpha chain-like [Salmo salar]
contig_0017419	1..337	3.54	3.46	11.02	0.00106	0.02	1	1.12	1.95	3.86	0.09	NaN	1		PREDICTED: ena/VASP-like protein isoform X4 [Salmo salar]
contig_0071866	1..1083	1.1	3.46	11.02	0.00106	0.02	1	0.1	-3.79	-13.87	0.39	NaN	1		PREDICTED: protein LDOC1L-like [Salmo salar]
contig_0084890	1..382	3.13	3.46	11.02	0.00106	0.02	1	0.66	1.38	2.6	0.26	NaN	1		Transposable element Tc1 transposase [Salmo salar]
contig_0072657	1..403	2.8	3.38	10.41	0.00143	0.02	1	1.56	2.68	6.39	0.01	NaN	1		not available
contig_0095042	1..701	1.61	3.38	10.41	0.00143	0.02	1	0.15	-3.79	-13.87	0.39	NaN	1		PREDICTED: transmembrane protein 144 [Salmo salar]
contig_0055660	1..742	1.43	3.29	9.8	0.00197	0.03	1	0.51	1.95	3.86	0.09	NaN	1		PREDICTED: E3 ubiquitin-protein ligase RING2-like [Salmo salar]
contig_0074068	1..528	2.01	3.29	9.8	0.00197	0.03	1	0.6	1.69	3.23	0.15	NaN	1		PREDICTED: AN1-type zinc finger protein 2B isoform X1 [Salmo salar]
contig_0122524	1..1453	0.73	3.29	9.8	0.00197	0.03	1	0.17	1.38	2.6	0.26	NaN	1		not available
contig_0148610	1..1846	0.57	3.29	9.8	0.00197	0.03	1	0.1	0.98	1.97	0.45	NaN	1		not available
contig_0014106	1..235	4.23	3.2	9.2	0.00273	0.03	1	1.61	1.95	3.86	0.09	NaN	1		PREDICTED: kinesin-like protein KIF1C [Salmo salar]
contig_0034029	1..4294	0.23	3.2	9.2	0.00273	0.03	1	0.02	-3.79	-13.87	0.39	NaN	1		PREDICTED: F-box only protein 44-like isoform X1 [Salmo salar]
contig_0075662	1..218	4.56	3.2	9.2	0.00273	0.03	1	0.58	0.42	1.34	0.77	NaN	1		PREDICTED: dynein heavy chain 5, axonemal-like [Salmo salar]
contig_0110515	1..773	1.29	3.2	9.2	0.00273	0.03	1	0.24	0.98	1.97	0.45	NaN	1		not available
contig_0112757	1..1711	0.58	3.2	9.2	0.00273	0.03	1	0.06	-3.79	-13.87	0.39	NaN	1		Acyl-coenzyme A oxidase 3, peroxisomal [Salmo salar]
contig_0127105	1..1265	0.79	3.2	9.2	0.00273	0.03	1	0.35	2.17	4.5	0.06	NaN	1		not available
contig_0064189	1..1190	1.62	3.19	9.16	3.96e-05	0.00117	1	0.18	-1.46	-2.75	0.35	NaN	1		not available
contig_0019056	1..525	9.73	3.17	9.01	1.32e-10	1.38e-08	3.6e-05	1.11	-0.69	-1.61	0.38	0.57	1		PREDICTED: translocation protein SEC63 homolog, partial [Salmo salar]
contig_0045028	1..697	12.75	3.12	8.67	9.5e-18	2.35e-15	2.58e-12	1.52	-1.29	-2.44	0.06	0.17	1		not available
contig_0028169	1..664	1.4	3.1	8.59	0.00382	0.04	1	0.19	0.42	1.34	0.77	NaN	1		not available
contig_0091181	1..207	4.49	3.1	8.59	0.00382	0.04	1	3.05	2.68	6.39	0.01	NaN	1		PREDICTED: acidic fibroblast growth factor intracellular-binding protein-like [Salmo salar]
contig_0105038	1..404	2.3	3.1	8.59	0.00382	0.04	1	1.25	2.36	5.13	0.04	NaN	1		not available
contig_0118873	1..750	1.24	3.1	8.59	0.00382	0.04	1	0.42	1.69	3.23	0.15	NaN	1		PREDICTED: uncharacterized protein LOC106580928 isoform X1 [Salmo salar]
contig_0126750	1..575	1.62	3.1	8.59	0.00382	0.04	1	0.77	2.17	4.5	0.06	NaN	1		PREDICTED: 40S ribosomal protein S5-like [Salmo salar]
contig_0136992	1..515	1.8	3.1	8.59	0.00382	0.04	1	0.49	1.38	2.6	0.26	NaN	1		PREDICTED: baculoviral IAP repeat-containing protein 6-like isoform X16 [Salmo salar]
contig_0140228	1..270	3.44	3.1	8.59	0.00382	0.04	1	1.4	1.95	3.86	0.09	NaN	1		PREDICTED: ribosome biogenesis protein BMS1 homolog [Salmo salar]
contig_0172470	1..491	1.89	3.1	8.59	0.00382	0.04	1	0.39	0.98	1.97	0.45	NaN	1		PREDICTED: versican core protein-like [Salmo salar]
contig_0179023	1..1067	0.87	3.1	8.59	0.00382	0.04	1	0.35	1.95	3.86	0.09	NaN	1		not available
contig_0082357	1..432	4.15	3.09	8.53	7.48e-05	0.00198	1	1.31	1.57	2.97	0.07	0.19	1		PREDICTED: eukaryotic initiation factor 4A-II isoform X2 [Salmo salar]
contig_0086465	1..2692	0.49	3.06	8.34	0.000606	0.01	1	0.06	-4.35	-20.36	0.32	NaN	1		PREDICTED: plasminogen-like [Salmo salar]
contig_0007752	1..1718	2.24	3.05	8.28	1.82e-08	1.32e-06	0.00494	0.28	-0.4	-1.32	0.62	0.76	1		serum albumin 2 [Salmo salar]
contig_0008981	1..631	37.32	3.04	8.23	7.6e-38	7.01e-35	2.07e-32	15.29	1.88	3.68	9.25e-14	8.31e-12	2.46e-08		not available
contig_0023695	1..270	6.39	3.04	8.21	0.000104	0.00259	1	0.78	-4.75	-26.86	0.27	NaN	1		PREDICTED: DNA (cytosine-5)-methyltransferase 3A-like isoform X4 [Salmo salar]
contig_0166817	1..1161	1.49	3.04	8.21	0.000104	0.00259	1	0.27	0.74	1.67	0.45	NaN	1		not available
contig_0129267	1..388	3.25	2.99	7.93	0.000853	0.01	1	1.3	1.8	3.49	0.06	NaN	1		PREDICTED: tryptase-like [Salmo salar]
contig_0002710	1..320	8.91	2.97	7.86	9.97e-07	4.9e-05	0.27	2.76	1.42	2.67	0.04	0.12	1		PREDICTED: von Willebrand factor D and EGF domain-containing protein-like isoform X2 [Salmo salar]
contig_0009057	1..408	19.51	2.96	7.76	6.13e-16	1.24e-13	1.67e-10	6.95	1.6	3.02	0.000164	0.0018	1		not available
contig_0031007	1..1490	5.08	2.96	7.76	2.77e-15	5.22e-13	7.52e-10	0.68	-0.99	-1.99	0.13	0.28	1		PREDICTED: myosin light chain kinase 3-like isoform X1 [Salmo salar]
contig_0037208	1..454	3.51	2.92	7.58	0.000203	0.00448	1	0.47	-1.46	-2.75	0.35	NaN	1		PREDICTED: uncharacterized protein LOC106599633, partial [Salmo salar]
contig_0009727	1..4126	0.29	2.91	7.51	0.00121	0.02	1	0.04	-4.35	-20.36	0.32	NaN	1		UPF0527 membrane protein [Salmo salar]
contig_0010121	1..380	3.14	2.91	7.51	0.00121	0.02	1	1.33	1.8	3.49	0.06	NaN	1		PREDICTED: uncharacterized protein LOC106591608 isoform X3 [Salmo salar]
contig_0032788	1..1401	1.94	2.91	7.5	1.89e-06	8.64e-05	0.52	0.41	0.79	1.72	0.29	0.48	1		PREDICTED: uncharacterized protein LOC106609103 isoform X4 [Salmo salar]
contig_0092837	1..1378	0.87	2.91	7.51	0.00121	0.02	1	0.12	-0.14	-1.1	0.92	NaN	1		Guanine nucleotide-binding protein GI/GS/GO subunit gamma-8 precursor [Salmo salar]
contig_0093569	1..265	4.51	2.91	7.51	0.00121	0.02	1	0.95	0.82	1.77	0.45	NaN	1		PREDICTED: centrosomal protein of 63 kDa [Salmo salar]
contig_0027958	1..1734	17.02	2.89	7.42	6.73e-43	8.1e-40	1.83e-37	8	1.93	3.8	3.45e-18	5.88e-16	9.18e-13		Deoxyribonuclease gamma precursor [Salmo salar]
contig_0078437	1..383	3.98	2.86	7.27	0.000288	0.00588	1	0.82	0.74	1.67	0.45	NaN	1		PREDICTED: dual specificity tyrosine-phosphorylation-regulated kinase 4-like isoform X2 [Salmo salar]
contig_0002644	1..2797	44.11	2.83	7.12	4.05e-88	1.68e-84	1.1e-82	6.44	-0.38	-1.3	0.03	0.1	1		PREDICTED: GTPase IMAP family member 8-like [Salmo salar]
contig_0026750	1..521	2.16	2.83	7.1	0.00173	0.02	1	0.3	-1.06	-2.09	0.51	NaN	1		PREDICTED: protein scribble homolog isoform X7 [Salmo salar]
contig_0085085	1..516	2.19	2.83	7.1	0.00173	0.02	1	0.37	0.42	1.34	0.72	NaN	1		PREDICTED: fermitin family homolog 2-like isoform X8 [Salmo salar]
contig_0097766	1..575	1.96	2.83	7.1	0.00173	0.02	1	1.21	2.26	4.78	0.02	0.07	1		PREDICTED: nesprin-1 isoform X6 [Salmo salar]
contig_0115540	1..645	2.88	2.83	7.12	7.2e-05	0.00192	1	0.88	1.26	2.4	0.12	0.27	1		not available
contig_0136465	1..841	2.21	2.83	7.12	7.2e-05	0.00192	1	0.45	0.68	1.61	0.44	NaN	1		not available
contig_0112388	1..1529	0.95	2.8	6.95	0.00041	0.00779	1	0.14	-0.54	-1.45	0.66	NaN	1		PREDICTED: fibrinogen beta chain-like [Salmo salar]
contig_0082596	1..969	4.04	2.79	6.91	2.78e-08	1.94e-06	0.00756	1.56	1.55	2.92	0.00495	0.03	1		PREDICTED: inhibitor of growth protein 4-like isoform X2 [Salmo salar]
contig_0098036	1..883	3.16	2.75	6.74	1.99e-06	9.04e-05	0.54	1.57	1.88	3.67	0.00234	0.02	1		not available
contig_0109675	1..1051	1.01	2.74	6.68	0.00251	0.03	1	0.15	-4.35	-20.36	0.32	NaN	1		PREDICTED: uncharacterized protein LOC106589669 isoform X1 [Salmo salar]
contig_0123104	1..648	1.64	2.74	6.68	0.00251	0.03	1	0.25	-0.14	-1.1	0.92	NaN	1		not available
contig_0164831	1..1682	0.63	2.74	6.68	0.00251	0.03	1	0.11	0.42	1.34	0.72	NaN	1		PREDICTED: alpha-1-antitrypsin homolog [Salmo salar]
contig_0033077	1..374	4.61	2.73	6.61	0.000145	0.0034	1	0.71	-5.06	-33.35	0.24	NaN	1		not available
contig_0059742	1..1346	1.03	2.73	6.64	0.000588	0.01	1	0.19	0.43	1.34	0.68	NaN	1		PREDICTED: cholesterol 7-alpha-monooxygenase-like [Salmo salar]
contig_0086413	1..10482	0.13	2.73	6.64	0.000588	0.01	1	0.02	-1.46	-2.75	0.35	NaN	1		PREDICTED: apolipoprotein B-100-like [Salmo salar]
contig_0037685	1..1586	3.76	2.69	6.47	4.1e-12	5.41e-10	1.11e-06	2.07	1.96	3.88	5.33e-06	9.73e-05	1		not available
contig_0070875	1..255	3.9	2.65	6.27	0.00367	0.04	1	1.98	1.8	3.49	0.06	NaN	1		Transmembrane and TPR repeat-containing protein 4 [Salmo salar]
contig_0087088	1..272	3.66	2.65	6.27	0.00367	0.04	1	1.39	1.4	2.63	0.17	NaN	1		ADP-ribosylarginine hydrolase [Salmo salar]
contig_0103241	1..1012	0.98	2.65	6.27	0.00367	0.04	1	0.44	1.61	3.06	0.1	NaN	1		PREDICTED: dematin isoform X5 [Salmo salar]
contig_0134444	1..1745	0.57	2.65	6.27	0.00367	0.04	1	0.14	0.82	1.77	0.45	NaN	1		not available
contig_0100012	1..981	1.62	2.61	6.11	0.000299	0.00607	1	0.27	0.11	1.08	0.91	NaN	1		PREDICTED: unconventional myosin-IXa-like isoform X1 [Salmo salar]
contig_0022819	1..384	23.32	2.59	6.04	2.25e-16	4.77e-14	6.12e-11	4	-0.72	-1.65	0.16	0.32	1		PREDICTED: receptor tyrosine-protein kinase erbB-3-like isoform X4 [Salmo salar]
contig_0067992	1..1134	1.11	2.59	6.01	0.00124	0.02	1	0.39	1.22	2.32	0.18	NaN	1		PREDICTED: uncharacterized protein LOC106588115 [Salmo salar]
contig_0084785	1..589	2.14	2.59	6.01	0.00124	0.02	1	1.07	1.72	3.3	0.05	0.14	1		PREDICTED: nuclear factor 7, brain-like [Salmo salar]
contig_0111457	1..805	1.57	2.59	6.01	0.00124	0.02	1	0.63	1.4	2.65	0.11	NaN	1		not available
contig_0129888	1..673	1.87	2.59	6.01	0.00124	0.02	1	0.84	1.57	2.97	0.07	0.19	1		not available
contig_0035410	1..2541	1.2	2.57	5.92	1.26e-06	6.03e-05	0.34	0.21	-1.83	-3.55	0.1	NaN	1		PREDICTED: fibrinogen gamma chain-like [Salmo salar]
contig_0088651	1..1224	2.01	2.57	5.94	1.11e-05	0.000395	1	1.18	1.94	3.83	0.00156	0.01	1		PREDICTED: LOW QUALITY PROTEIN: ribosomal L1 domain-containing protein 1 [Salmo salar]
contig_0014729	1..426	5.61	2.53	5.78	1.57e-05	0.000534	1	2.96	1.74	3.34	0.00532	0.03	1		PREDICTED: signal-induced proliferation-associated 1-like protein 3 isoform X2 [Salmo salar]
contig_0018462	1..1287	2.99	2.53	5.76	9.58e-08	6.02e-06	0.03	1.62	1.77	3.4	0.000424	0.00398	1		PREDICTED: NADPH oxidase organizer 1-like [Salmo salar]
contig_0007215	1..1073	1.11	2.51	5.7	0.00182	0.02	1	0.71	1.98	3.95	0.02	0.07	1		PREDICTED: CMP-N-acetylneuraminate-beta-galactosamide-alpha-2,3-sialyltransferase 1-like isoform X2 [Salmo salar]
contig_0011538	1..270	16.22	2.51	5.68	1.89e-08	1.37e-06	0.00513	8.64	1.73	3.31	0.00026	0.00265	1		not available
contig_0072895	1..222	5.38	2.51	5.7	0.00182	0.02	1	2.84	1.72	3.3	0.05	0.14	1		PREDICTED: elongation of very long chain fatty acids protein 4-like [Salmo salar]
contig_0077935	1..228	5.24	2.51	5.7	0.00182	0.02	1	3.6	2.1	4.28	0.01	0.05	1		PREDICTED: CUB and sushi domain-containing protein 1-like [Salmo salar]
contig_0100659	1..935	3.76	2.51	5.7	3.1e-07	1.74e-05	0.08	1.55	1.36	2.57	0.01	0.05	1		not available
contig_0109927	1..201	10.23	2.5	5.67	5.86e-05	0.00162	1	4.71	1.52	2.86	0.03	0.09	1		PREDICTED: coiled-coil domain-containing protein 108 isoform X1 [Salmo salar]
contig_0176695	1..1926	0.9	2.47	5.54	0.000228	0.00488	1	0.39	1.41	2.66	0.05	0.16	1		PREDICTED: helicase SRCAP-like isoform X2 [Salmo salar]
contig_0169694	1..346	6.52	2.45	5.46	3.22e-05	0.000982	1	3.83	1.81	3.5	0.00353	0.02	1		PREDICTED: inactive phospholipase C-like protein 2 isoform X2 [Salmo salar]
contig_0033121	1..1289	0.87	2.43	5.38	0.00269	0.03	1	0.54	1.86	3.63	0.03	0.1	1		NADH dehydrogenase iron-sulfur protein 2, mitochondrial precursor [Salmo salar]
contig_0083949	1..1885	0.6	2.43	5.38	0.00269	0.03	1	0.23	1.22	2.32	0.18	NaN	1		PREDICTED: collagen alpha-2(VI) chain-like isoform X2 [Salmo salar]
contig_0161314	1..358	3.15	2.43	5.38	0.00269	0.03	1	1.94	1.86	3.63	0.03	0.1	1		PREDICTED: 40S ribosomal protein S5-like [Salmo salar]
contig_0163772	1..1907	0.59	2.43	5.38	0.00269	0.03	1	0.2	1	2	0.29	NaN	1		PREDICTED: hemopexin-like [Salmo salar]
contig_0021658	1..208	6.7	2.42	5.35	0.000927	0.01	1	4.55	1.99	3.97	0.00856	0.04	1		PREDICTED: DNA-directed RNA polymerase I subunit RPA2 [Salmo salar]
contig_0057766	1..286	4.87	2.42	5.35	0.000927	0.01	1	2.65	1.67	3.18	0.03	0.11	1		PREDICTED: epidermal growth factor receptor kinase substrate 8-like protein 1 [Salmo salar]
contig_0072732	1..524	3.16	2.41	5.32	0.000331	0.00657	1	0.61	-2.03	-4.08	0.17	NaN	1		PREDICTED: ribonuclease-like 3 [Salmo salar]
contig_0075715	1..859	1.93	2.41	5.32	0.000331	0.00657	1	1.03	1.63	3.1	0.02	0.09	1		not available
contig_0005475	1..584	4.66	2.4	5.28	7.14e-06	0.000271	1	0.91	-0.55	-1.47	0.49	0.66	1		UPF0527 membrane protein [Salmo salar]
contig_0038586	1..2559	4.43	2.4	5.29	1.41e-18	3.72e-16	3.83e-13	2.29	1.58	2.98	6.11e-08	1.84e-06	0.02		PREDICTED: formin-binding protein 1-like isoform X2 [Salmo salar]
contig_0088755	1..211	39.3	2.39	5.23	1.54e-14	2.69e-12	4.19e-09	7.78	-1.34	-2.53	0.02	0.08	1		not available
contig_0066736	1..499	5.85	2.37	5.15	4.12e-06	0.000168	1	2.91	1.49	2.8	0.0073	0.04	1		PREDICTED: GTPase IMAP family member 8-like, partial [Salmo salar]
contig_0108282	1..3000	0.97	2.37	5.15	4.12e-06	0.000168	1	0.53	1.61	3.04	0.00335	0.02	1		PREDICTED: RIMS-binding protein 2 isoform X4 [Salmo salar]
contig_0025177	1..524	4.56	2.36	5.14	2.58e-05	0.000815	1	2.17	1.42	2.68	0.02	0.08	1		not available
contig_0009030	1..200	6.63	2.35	5.09	0.00137	0.02	1	2.21	0.9	1.87	0.29	NaN	1		Sperm acrosome membrane-associated protein 4 precursor [Salmo salar]
contig_0042184	1..504	3.16	2.35	5.11	0.000485	0.00887	1	1.13	1	2	0.19	0.37	1		PREDICTED: poly [ADP-ribose] polymerase 14-like [Salmo salar]
contig_0044706	1..722	1.84	2.35	5.09	0.00137	0.02	1	1.31	1.99	3.97	0.00856	0.04	1		PREDICTED: LOW QUALITY PROTEIN: AT-rich interactive domain-containing protein 1A-like [Salmo salar]
contig_0057252	1..501	2.65	2.35	5.09	0.00137	0.02	1	1.01	1.09	2.13	0.19	0.36	1		PREDICTED: E3 ubiquitin-protein ligase Hakai-like isoform X4 [Salmo salar]
contig_0063672	1..326	4.88	2.35	5.11	0.000485	0.00887	1	0.97	-0.55	-1.46	0.59	NaN	1		PREDICTED: dipeptidyl aminopeptidase-like protein 6 isoform X5 [Salmo salar]
contig_0000280	1..926	1.15	2.34	5.07	0.00401	0.04	1	0.41	1	2	0.29	NaN	1		not available
contig_0007451	1..607	1.75	2.34	5.07	0.00401	0.04	1	0.52	0.74	1.67	0.45	NaN	1		aryl hydrocarbon receptor 1 beta-like protein [Salmo salar]
contig_0012107	1..942	1.13	2.34	5.07	0.00401	0.04	1	0.4	1	2	0.29	NaN	1		Myelin protein zero-like protein 2 precursor [Salmo salar]
contig_0023525	1..356	2.98	2.34	5.07	0.00401	0.04	1	0.59	-0.54	-1.45	0.66	NaN	1		SPATA5 [Salmo salar]
contig_0038211	1..771	1.38	2.34	5.07	0.00401	0.04	1	0.33	0.43	1.34	0.68	NaN	1		60S ribosomal protein L10 [Salmo salar]
contig_0044494	1..270	3.93	2.34	5.07	0.00401	0.04	1	2.8	1.98	3.95	0.02	0.07	1		not available
contig_0067051	1..2506	0.42	2.34	5.07	0.00401	0.04	1	0.18	1.22	2.32	0.18	NaN	1		PREDICTED: RNA-binding protein 44 isoform X2 [Salmo salar]
contig_0069741	1..845	1.26	2.34	5.07	0.00401	0.04	1	0.52	1.22	2.32	0.18	NaN	1		Myelin protein zero-like protein 2 precursor [Salmo salar]
contig_0109721	1..278	3.82	2.34	5.07	0.00401	0.04	1	0.76	-0.54	-1.45	0.66	NaN	1		PREDICTED: protocadherin gamma-C5-like [Salmo salar]
contig_0117444	1..417	2.55	2.34	5.07	0.00401	0.04	1	0.51	0.02	1.02	0.98	NaN	1		not available
contig_0135686	1..585	1.81	2.34	5.07	0.00401	0.04	1	0.65	1	2	0.29	NaN	1		PREDICTED: apoptosis-inducing factor 3-like isoform X1 [Salmo salar]
contig_0166810	1..709	1.5	2.34	5.07	0.00401	0.04	1	0.53	1	2	0.29	NaN	1		PREDICTED: calcitonin gene-related peptide-like isoform X2 [Salmo salar]
contig_0005830	1..1874	39.93	2.33	5.04	8.22e-56	1.55e-52	2.24e-50	27.93	1.94	3.85	3.72e-38	3.24e-35	9.91e-33		PREDICTED: butyrophilin subfamily 2 member A1-like isoform X1 [Salmo salar]
contig_0024172	1..278	15.75	2.33	5.02	5.18e-08	3.45e-06	0.01	3.63	0.34	1.27	0.52	0.68	1		PREDICTED: protein FAM65B-like [Salmo salar]
contig_0067770	1..427	17.87	2.31	4.97	2.65e-13	4.03e-11	7.2e-08	12.85	1.96	3.9	1.6e-09	6.89e-08	0.000427		PREDICTED: myotubularin-related protein 4-like [Salmo salar]
contig_0010371	1..800	1.91	2.29	4.9	0.000713	0.01	1	0.63	0.84	1.78	0.29	0.48	1		PREDICTED: mucin-2-like [Salmo salar]
contig_0077381	1..639	2.39	2.29	4.9	0.000713	0.01	1	1.78	1.99	3.98	0.00415	0.02	1		PREDICTED: glutenin, high molecular weight subunit DY10-like isoform X1 [Salmo salar]
contig_0078691	1..401	3.8	2.29	4.9	0.000713	0.01	1	1.57	1.15	2.22	0.13	0.28	1		Ornithine carbamoyltransferase, mitochondrial precursor [Salmo salar]
contig_0080506	1..447	3.41	2.29	4.9	0.000713	0.01	1	2.4	1.91	3.76	0.00633	0.03	1		PREDICTED: tyrosine-protein phosphatase non-receptor type 21-like isoform X2 [Salmo salar]
contig_0095539	1..1321	1.15	2.29	4.9	0.000713	0.01	1	0.67	1.63	3.1	0.02	0.09	1		PREDICTED: uncharacterized protein LOC106609103 isoform X4 [Salmo salar]
contig_0116458	1..566	2.7	2.29	4.9	0.000713	0.01	1	1.67	1.73	3.32	0.01	0.06	1		not available
contig_0129924	1..1359	1.12	2.29	4.9	0.000713	0.01	1	0.51	1.29	2.44	0.08	0.21	1		PREDICTED: type I inositol 3,4-bisphosphate 4-phosphatase-like [Salmo salar]
contig_0139423	1..822	1.86	2.29	4.9	0.000713	0.01	1	0.46	0.43	1.34	0.61	NaN	1		PREDICTED: olfactory receptor 11A1-like [Salmo salar]
contig_0155658	1..1035	1.47	2.29	4.9	0.000713	0.01	1	0.61	1.15	2.22	0.13	0.28	1		PREDICTED: glucagon receptor-like [Salmo salar]
contig_0015609	1..781	2.89	2.28	4.86	5.34e-05	0.0015	1	2.1	1.95	3.86	0.000798	0.00662	1		PREDICTED: zona pellucida sperm-binding protein 3-like [Salmo salar]
contig_0021990	1..625	2.02	2.28	4.84	0.00203	0.03	1	0.42	-0.85	-1.8	0.48	NaN	1		PREDICTED: ERC protein 2-like [Salmo salar]
contig_0025850	1..2099	5.44	2.28	4.86	7.74e-18	1.95e-15	2.1e-12	3.45	1.75	3.37	2.21e-10	1.12e-08	5.89e-05		PREDICTED: digestive organ expansion factor homolog isoform X1 [Salmo salar]
contig_0051484	1..342	3.69	2.28	4.84	0.00203	0.03	1	0.77	-0.29	-1.22	0.78	NaN	1		not available
contig_0080441	1..275	4.58	2.28	4.84	0.00203	0.03	1	2.29	1.41	2.66	0.08	0.2	1		PREDICTED: fatty acid synthase-like [Salmo salar]
contig_0107788	1..483	4.67	2.28	4.86	5.34e-05	0.0015	1	2.09	1.25	2.38	0.04	0.14	1		interleukin-17A/F3 [Salmo salar]
contig_0114896	1..1223	1.03	2.28	4.84	0.00203	0.03	1	0.67	1.79	3.45	0.02	0.08	1		PREDICTED: glucagon receptor-like [Salmo salar]
contig_0054143	1..285	6.98	2.27	4.82	0.00014	0.0033	1	1.49	-1.51	-2.85	0.18	NaN	1		not available
contig_0073945	1..1034	1.67	2.25	4.76	0.000379	0.0073	1	1.1	1.78	3.43	0.00716	0.04	1		PREDICTED: transmembrane protein 120A-like [Salmo salar]
contig_0132606	1..592	2.91	2.25	4.76	0.000379	0.0073	1	0.85	0.62	1.53	0.42	0.6	1		Caspase-14 precursor [Salmo salar]
contig_0147759	1..999	2.19	2.24	4.72	7.73e-05	0.00204	1	0.95	1.16	2.23	0.07	0.18	1		PREDICTED: uncharacterized protein LOC106591608 isoform X3 [Salmo salar]
contig_0043866	1..1137	5.89	2.23	4.68	1.15e-11	1.42e-09	3.13e-06	3.55	1.62	3.08	1.13e-05	0.000187	1		Leukocyte cell-derived chemotaxin 2 precursor [Salmo salar]
contig_0068867	1..378	3.86	2.23	4.69	0.00105	0.02	1	1.83	1.29	2.44	0.08	0.21	1		not available
contig_0120915	1..210	9.16	2.22	4.66	0.000205	0.00449	1	4.5	1.33	2.51	0.04	0.13	1		PREDICTED: meckelin-like [Salmo salar]
contig_0048341	1..1020	21.98	2.21	4.63	1.06e-27	5.12e-25	2.87e-22	11.56	1.41	2.65	5.15e-11	2.99e-09	1.37e-05		PREDICTED: microsomal glutathione S-transferase 1-like [Salmo salar]
contig_0010030	1..2081	0.57	2.2	4.59	0.00304	0.03	1	0.36	1.67	3.18	0.03	0.11	1		PREDICTED: zinc finger BED domain-containing protein 5-like [Salmo salar]
contig_0028555	1..1850	3.55	2.2	4.58	2.3e-11	2.69e-09	6.25e-06	1.87	1.4	2.64	0.000194	0.00207	1		PREDICTED: upstream stimulatory factor 2-like [Salmo salar]
contig_0030243	1..4449	0.27	2.2	4.59	0.00304	0.03	1	0.16	1.55	2.92	0.05	0.15	1		PREDICTED: calpain-2 catalytic subunit-like [Salmo salar]
contig_0053858	1..1508	0.79	2.2	4.59	0.00304	0.03	1	0.5	1.67	3.18	0.03	0.11	1		PREDICTED: coiled-coil domain-containing protein 112 isoform X1 [Salmo salar]
contig_0103875	1..1666	0.72	2.2	4.59	0.00304	0.03	1	0.16	-0.85	-1.8	0.48	NaN	1		PREDICTED: transcription factor COE1-like [Salmo salar]
contig_0132864	1..1089	1.1	2.2	4.59	0.00304	0.03	1	0.24	0.11	1.08	0.91	NaN	1		PREDICTED: zinc finger protein 25-like [Salmo salar]
contig_0012976	1..312	6.8	2.19	4.57	0.000112	0.00275	1	3.84	1.5	2.82	0.01	0.06	1		PREDICTED: cGMP-inhibited 3',5'-cyclic phosphodiesterase B-like, partial [Salmo salar]
contig_0043954	1..399	6.48	2.19	4.57	2.45e-05	0.000781	1	4.58	1.82	3.53	0.000704	0.00597	1		myosin 1, partial [Salmo salar]
contig_0059763	1..2105	1.89	2.19	4.57	3.77e-07	2.08e-05	0.1	1.23	1.7	3.24	0.000162	0.00179	1		PREDICTED: Down syndrome cell adhesion molecule isoform X2 [Salmo salar]
contig_0084510	1..297	5.58	2.19	4.58	0.000557	0.00985	1	1.7	0.62	1.53	0.42	0.6	1		PREDICTED: syntaxin-2-like isoform X4 [Salmo salar]
contig_0012974	1..308	6.03	2.17	4.5	0.000299	0.00607	1	4.5	1.88	3.67	0.00234	0.02	1		PREDICTED: low-density lipoprotein receptor-related protein 2 isoform X5 [Salmo salar]
contig_0115877	1..1580	1.18	2.17	4.5	0.000299	0.00607	1	0.52	1.12	2.18	0.09	0.23	1		PREDICTED: arrestin red cell isoform 1-like, partial [Salmo salar]
contig_0037076	1..893	1.56	2.16	4.48	0.00156	0.02	1	0.92	1.53	2.88	0.04	0.12	1		PREDICTED: uncharacterized protein LOC106586872 isoform X1 [Salmo salar]
contig_0058968	1..593	2.35	2.16	4.48	0.00156	0.02	1	1.81	1.91	3.76	0.00633	0.03	1		not available
contig_0061380	1..882	1.58	2.16	4.48	0.00156	0.02	1	0.57	0.84	1.78	0.29	0.48	1		not available
contig_0105488	1..611	2.28	2.16	4.48	0.00156	0.02	1	1.75	1.91	3.76	0.00633	0.03	1		PREDICTED: transcription factor Sox-9-A-like isoform X1 [Salmo salar]
contig_0023180	1..888	10.16	2.14	4.41	3.84e-14	6.46e-12	1.04e-08	4.47	1.09	2.12	0.00135	0.01	1		PREDICTED: ubiquitin-like protein ATG12 isoform X1 [Salmo salar]
contig_0053393	1..1934	0.82	2.14	4.4	0.000821	0.01	1	0.68	2	3.99	0.00206	0.01	1		PREDICTED: pleckstrin homology domain-containing family A member 7-like isoform X9 [Salmo salar]
contig_0062058	1..276	5.77	2.14	4.4	0.000821	0.01	1	3.43	1.52	2.86	0.03	0.09	1		PREDICTED: nuclear receptor subfamily 1 group I member 2-like isoform X2 [Salmo salar]
contig_0134545	1..1520	1.05	2.14	4.4	0.000821	0.01	1	0.54	1.31	2.48	0.06	0.17	1		PREDICTED: uncharacterized protein LOC106604081 [Salmo salar]
contig_0008673	1..2546	9.59	2.13	4.39	4.37e-28	2.19e-25	1.19e-22	5.67	1.5	2.83	1.3e-13	1.15e-11	3.46e-08		PREDICTED: E3 ubiquitin-protein ligase pellino homolog 1 [Salmo salar]
contig_0020482	1..923	1.22	2.12	4.33	0.00457	0.05	1	1.02	1.99	3.97	0.00856	0.04	1		Charged multivesicular body protein 3 [Salmo salar]
contig_0034329	1..346	3.26	2.12	4.33	0.00457	0.05	1	1.28	0.9	1.87	0.29	NaN	1		PREDICTED: metal transporter CNNM1-like, partial [Salmo salar]
contig_0052610	1..762	2.35	2.12	4.34	0.000439	0.0082	1	1.41	1.51	2.84	0.02	0.07	1		not available
contig_0055319	1..239	7.49	2.12	4.34	0.000439	0.0082	1	2.9	0.88	1.84	0.2	0.37	1		PREDICTED: transcription initiation factor TFIID subunit 4 [Salmo salar]
contig_0068140	1..904	1.25	2.12	4.33	0.00457	0.05	1	0.29	0.11	1.08	0.91	NaN	1		not available
contig_0068258	1..518	2.18	2.12	4.33	0.00457	0.05	1	0.61	0.43	1.34	0.64	NaN	1		Transposable element Tc1 transposase [Salmo salar]
contig_0080009	1..378	2.98	2.12	4.33	0.00457	0.05	1	1.17	0.9	1.87	0.29	NaN	1		not available
contig_0089635	1..866	1.3	2.12	4.33	0.00457	0.05	1	0.44	0.68	1.61	0.44	NaN	1		PREDICTED: collagen alpha-1(VI) chain-like [Salmo salar]
contig_0002944	1..2159	56.97	2.11	4.32	2.79e-56	5.39e-53	7.59e-51	36.68	1.6	3.04	3.12e-32	1.98e-29	8.31e-27		PREDICTED: signal transducer and activator of transcription 1 alpha isoform X3 [Salmo salar]
contig_0119093	1..1482	1.34	2.1	4.29	0.000238	0.00507	1	0.55	0.95	1.94	0.14	0.29	1		PREDICTED: P2Y purinoceptor 2-like [Salmo salar]
contig_0007036	1..764	1.74	2.09	4.26	0.00233	0.03	1	0.42	-0.55	-1.46	0.59	NaN	1		PREDICTED: bifunctional endo-1,4-beta-xylanase XylA-like isoform X1 [Salmo salar]
contig_0031659	1..338	3.93	2.09	4.26	0.00233	0.03	1	2.05	1.29	2.44	0.08	0.21	1		PREDICTED: F-box/WD repeat-containing protein 11-like isoform X2 [Salmo salar]
contig_0032226	1..248	5.35	2.09	4.26	0.00233	0.03	1	2.8	1.29	2.44	0.08	0.21	1		PREDICTED: zinc finger protein 773-like isoform X3 [Salmo salar]
contig_0083896	1..533	2.49	2.09	4.26	0.00233	0.03	1	1.18	1.15	2.22	0.13	0.28	1		PREDICTED: phosphoinositide 3-kinase regulatory subunit 4-like [Salmo salar]
contig_0085584	1..390	7.31	2.09	4.27	1.66e-05	0.000559	1	2.75	0.81	1.76	0.14	0.3	1		PREDICTED: adapter protein CIKS-like isoform X1 [Salmo salar]
contig_0117781	1..208	10.52	2.09	4.25	0.000131	0.00313	1	4.55	1.01	2.01	0.1	0.24	1		PREDICTED: sphingosine 1-phosphate receptor 2-like [Salmo salar]
contig_0127783	1..3023	0.72	2.09	4.25	0.000131	0.00313	1	0.54	1.8	3.48	0.00136	0.01	1		PREDICTED: endogenous retrovirus group 3 member 1 Env polyprotein-like [Salmo salar]
contig_0164543	1..1204	1.1	2.09	4.26	0.00233	0.03	1	0.58	1.29	2.44	0.08	0.21	1		not available
contig_0007604	1..962	1.59	2.08	4.21	0.00122	0.02	1	0.52	0.62	1.53	0.42	0.6	1		Deoxyribonuclease gamma precursor [Salmo salar]
contig_0010896	1..791	7.38	2.08	4.23	6.54e-10	6.08e-08	0.000178	1.81	-1.14	-2.21	0.05	0.15	1		not available
contig_0016906	1..264	9.05	2.08	4.22	7.32e-05	0.00195	1	6.21	1.66	3.17	0.00227	0.02	1		not available
contig_0020229	1..407	5.87	2.08	4.22	7.32e-05	0.00195	1	4.34	1.77	3.41	0.00104	0.00824	1		not available
contig_0025182	1..2370	4.65	2.08	4.23	6.37e-16	1.28e-13	1.73e-10	3.43	1.77	3.41	2.17e-11	1.35e-09	5.79e-06		PREDICTED: otoferlin-like [Salmo salar]
contig_0028153	1..273	5.59	2.08	4.21	0.00122	0.02	1	3.7	1.61	3.05	0.02	0.07	1		PREDICTED: zinc fingers and homeoboxes protein 3-like [Salmo salar]
contig_0028898	1..1461	8.4	2.08	4.22	3.49e-17	8.12e-15	9.5e-12	3.15	0.79	1.73	0.00473	0.03	1		PREDICTED: SLAM family member 5-like [Salmo salar]
contig_0041499	1..783	1.95	2.08	4.21	0.00122	0.02	1	1.37	1.69	3.24	0.01	0.05	1		not available
contig_0055355	1..1078	3.02	2.08	4.22	5.69e-06	0.000223	1	1.4	1.1	2.15	0.03	0.1	1		PREDICTED: zinc finger protein 862-like isoform X4 [Salmo salar]
contig_0086474	1..1664	0.92	2.08	4.21	0.00122	0.02	1	0.72	1.85	3.62	0.00471	0.03	1		PREDICTED: adhesion G protein-coupled receptor E1-like [Salmo salar]
contig_0138199	1..332	4.6	2.08	4.21	0.00122	0.02	1	3.99	2	3.99	0.00206	0.01	1		40S ribosomal protein S30 [Salmo salar]
contig_0001330	1..1058	3.45	2.07	4.19	2.04e-06	9.19e-05	0.55	0.85	-1.31	-2.48	0.08	0.2	1		PREDICTED: uncharacterized protein LOC106607289 [Salmo salar]
contig_0014448	1..3735	8.9	2.07	4.2	2.18e-32	1.43e-29	5.92e-27	2.6	0.42	1.34	0.03	0.11	1		PREDICTED: serotonin N-acetyltransferase-like [Salmo salar]
contig_0022389	1..1638	1.58	2.07	4.19	4.14e-05	0.00121	1	0.62	0.84	1.79	0.14	0.3	1		not available
contig_0019911	1..1113	3.81	2.05	4.14	4.69e-07	2.54e-05	0.13	3	1.83	3.56	1.03e-05	0.000171	1		not available
contig_0010819	1..945	6.67	2.04	4.11	2.58e-10	2.57e-08	7.01e-05	3.14	1.08	2.11	0.0044	0.03	1		PREDICTED: butyrophilin subfamily 2 member A1-like isoform X2 [Salmo salar]
contig_0028234	1..248	9.36	2.04	4.1	0.000106	0.00263	1	4.32	1.05	2.07	0.07	0.19	1		PREDICTED: H/ACA ribonucleoprotein complex subunit 3 isoform X1 [Salmo salar]
contig_0035577	1..930	40.02	2.04	4.1	1.36e-33	9.97e-31	3.69e-28	12.2	0.45	1.36	0.02	0.08	1		not available
contig_0050124	1..228	9.31	2.04	4.12	0.000191	0.00423	1	3.04	0.57	1.48	0.38	0.57	1		not available
contig_0054124	1..1749	1.56	2.03	4.07	3.4e-05	0.00103	1	0.4	0.19	1.14	0.75	0.86	1		PREDICTED: PR domain zinc finger protein 8-like [Salmo salar]
contig_0047821	1..231	5.46	2.02	4.05	0.0035	0.04	1	1.91	0.65	1.56	0.43	0.6	1		not available
contig_0081317	1..389	3.24	2.02	4.05	0.0035	0.04	1	2.76	1.91	3.76	0.00633	0.03	1		not available
contig_0085767	1..585	2.15	2.02	4.05	0.0035	0.04	1	1.72	1.83	3.54	0.0097	0.05	1		not available
contig_0117820	1..1209	1.04	2.02	4.05	0.0035	0.04	1	0.26	-5.32	-39.84	0.22	NaN	1		not available
contig_0121891	1..980	1.29	2.02	4.05	0.0035	0.04	1	0.97	1.73	3.32	0.01	0.06	1		not available
contig_0128066	1..1034	1.22	2.02	4.05	0.0035	0.04	1	0.73	1.41	2.66	0.05	0.16	1		PREDICTED: G-protein coupled receptor 4-like [Salmo salar]
contig_0148811	1..452	2.79	2.02	4.05	0.0035	0.04	1	0.7	-0.55	-1.46	0.59	NaN	1		not available
contig_0157055	1..1689	0.75	2.02	4.05	0.0035	0.04	1	0.26	0.65	1.56	0.43	0.6	1		PREDICTED: sterol regulatory element-binding protein 2-like isoform X2 [Salmo salar]
contig_0040977	1..1165	1.25	2.01	4.03	0.00181	0.02	1	0.32	-5.53	-46.34	0.2	NaN	1		PREDICTED: piggyBac transposable element-derived protein 4-like, partial [Salmo salar]
contig_0081823	1..1054	1.57	2.01	4.02	0.000952	0.01	1	0.4	-0.55	-1.47	0.54	NaN	1		transposase [Salmo salar]
contig_0106957	1..304	4.8	2.01	4.03	0.00181	0.02	1	1.22	-0.05	-1.03	0.96	NaN	1		not available
contig_0010148	1..1291	1.44	2	4	0.00051	0.00923	1	0.44	0.43	1.35	0.54	0.7	1		not available
contig_0034197	1..370	11.65	2	4.01	5.63e-07	2.98e-05	0.15	9.54	1.84	3.58	5.99e-06	0.000107	1		PREDICTED: putative ferric-chelate reductase 1 [Salmo salar]
contig_0051915	1..3241	2.22	-2	-4.01	1.12e-09	1e-07	0.000304	2.22	-1.7	-3.24	3.81e-08	1.2e-06	0.01		PREDICTED: MAM domain-containing protein 2-like [Salmo salar]
contig_0086996	1..3383	0.58	-2	-4.01	0.00112	0.02	1	0.58	-1.76	-3.39	0.00261	0.02	1		PREDICTED: transmembrane protein 229B-like isoform X1 [Salmo salar]
contig_0093539	1..567	3.45	-2	-4.01	0.00112	0.02	1	3.45	-0.68	-1.61	0.13	0.29	1		PREDICTED: fibronectin type III domain-containing protein 3B [Salmo salar]
contig_0123701	1..1728	1.13	-2	-4.01	0.00112	0.02	1	1.13	-1.07	-2.1	0.03	0.11	1		PREDICTED: transmembrane protein 200A-like isoform X2 [Salmo salar]
contig_0136284	1..1402	1.4	-2	-4.01	0.00112	0.02	1	1.4	-0.77	-1.71	0.1	0.23	1		Deoxyribonuclease gamma precursor [Salmo salar]
contig_0027664	1..1539	18.64	-2.01	-4.04	1.24e-25	5.39e-23	3.38e-20	18.64	-1.52	-2.87	1.42e-17	2.25e-15	3.78e-12		E3 ubiquitin-protein ligase LINCR [Salmo salar]
contig_0027831	1..3862	0.44	-2.01	-4.04	0.00226	0.03	1	0.44	-0.39	-1.31	0.39	0.58	1		PREDICTED: Golgi apparatus protein 1-like [Salmo salar]
contig_0031234	1..2309	21.32	-2.01	-4.03	1.74e-34	1.33e-31	4.72e-29	21.32	-0.54	-1.45	0.000118	0.00137	1		PREDICTED: platelet-derived growth factor receptor-like protein isoform X1 [Salmo salar]
contig_0143670	1..2247	0.75	-2.01	-4.04	0.00226	0.03	1	0.75	-1.74	-3.35	0.0051	0.03	1		PREDICTED: striated muscle preferentially expressed protein kinase-like isoform X3 [Salmo salar]
contig_0158252	1..1283	1.32	-2.01	-4.04	0.00226	0.03	1	1.32	-0.17	-1.13	0.69	0.82	1		PREDICTED: transcription elongation factor B polypeptide 2 [Salmo salar]
contig_0184473	1..732	2.31	-2.01	-4.04	0.00226	0.03	1	2.31	-1.1	-2.14	0.04	0.12	1		not available
contig_0191874	1..292	5.8	-2.01	-4.04	0.00226	0.03	1	8.42	0.72	1.64	0.06	0.17	1		not available
contig_0069036	1..1604	2.11	-2.02	-4.07	2.87e-05	0.000893	1	2.11	-1.24	-2.36	0.00232	0.02	1		PREDICTED: uncharacterized protein LOC106570855 [Salmo salar]
contig_0118155	1..1036	2.45	-2.02	-4.06	0.000233	0.00498	1	2.45	-0.11	-1.08	0.77	0.87	1		PREDICTED: filamin A-interacting protein 1-like isoform X1 [Salmo salar]
contig_0125251	1..1125	2.26	-2.02	-4.06	0.000233	0.00498	1	2.26	-1.68	-3.21	0.00098	0.00785	1		PREDICTED: collagen alpha-1(XIV) chain isoform X2 [Salmo salar]
contig_0153201	1..2908	0.87	-2.02	-4.06	0.000233	0.00498	1	0.87	-1.44	-2.72	0.00272	0.02	1		PREDICTED: nck-associated protein 5-like isoform X2 [Salmo salar]
contig_0015378	1..4616	3.17	-2.03	-4.07	1.8e-16	3.87e-14	4.89e-11	3.17	-0.16	-1.12	0.37	0.56	1		PREDICTED: myosin heavy chain, fast skeletal muscle-like [Salmo salar]
contig_0037632	1..418	3.42	-2.03	-4.08	0.00466	0.05	1	4.98	0.72	1.65	0.08	0.2	1		PREDICTED: lysine-specific demethylase 6A-like isoform X2 [Salmo salar]
contig_0047352	1..390	3.66	-2.03	-4.08	0.00466	0.05	1	3.66	-0.99	-1.99	0.08	0.2	1		not available
contig_0054416	1..551	2.59	-2.03	-4.08	0.00466	0.05	1	2.59	-1.31	-2.48	0.03	0.1	1		not available
contig_0065248	1..5006	4.16	-2.03	-4.08	4.93e-21	1.57e-18	1.34e-15	4.16	-0.42	-1.34	0.01	0.05	1		PREDICTED: cadherin-11-like [Salmo salar]
contig_0067699	1..814	20.49	-2.03	-4.1	3.72e-18	9.64e-16	1.01e-12	20.49	-0.27	-1.2	0.13	0.28	1		Mimecan precursor [Salmo salar]
contig_0067720	1..2219	1.41	-2.03	-4.09	5.26e-05	0.00148	1	1.41	-1.27	-2.42	0.00267	0.02	1		Deoxyribonuclease gamma precursor [Salmo salar]
contig_0072965	1..2248	1.88	-2.03	-4.07	4.11e-06	0.000168	1	1.88	-0.43	-1.35	0.14	0.3	1		PREDICTED: WNT1-inducible-signaling pathway protein 1-like [Salmo salar]
contig_0073316	1..1234	1.16	-2.03	-4.08	0.00466	0.05	1	1.16	-0.62	-1.53	0.23	0.41	1		RCC2 homolog [Salmo salar]
contig_0087183	1..1585	0.9	-2.03	-4.08	0.00466	0.05	1	0.9	-1.5	-2.83	0.02	0.07	1		PREDICTED: autism susceptibility gene 2 protein-like isoform X6 [Salmo salar]
contig_0105987	1..2458	0.58	-2.03	-4.08	0.00466	0.05	1	0.58	-1.31	-2.48	0.03	0.1	1		PREDICTED: ninein-like protein isoform X2 [Salmo salar]
contig_0117317	1..420	3.4	-2.03	-4.08	0.00466	0.05	1	3.4	-1.31	-2.48	0.03	0.1	1		PREDICTED: serine/threonine-protein kinase WNK1-like isoform X2 [Salmo salar]
contig_0126979	1..333	4.29	-2.03	-4.08	0.00466	0.05	1	4.29	-1.31	-2.48	0.03	0.1	1		not available
contig_0135553	1..1075	1.33	-2.03	-4.08	0.00466	0.05	1	1.33	-0.32	-1.25	0.51	0.68	1		PREDICTED: glutenin, high molecular weight subunit DY10-like isoform X2 [Salmo salar]
contig_0157742	1..1562	0.92	-2.03	-4.08	0.00466	0.05	1	0.92	-1.5	-2.83	0.02	0.07	1		PREDICTED: A disintegrin and metalloproteinase with thrombospondin motifs 18-like [Salmo salar]
contig_0190483	1..242	5.91	-2.03	-4.08	0.00466	0.05	1	5.91	-7.46	-176.21	0.08	0.2	1		PREDICTED: choline transporter-like protein 5-B isoform X2 [Salmo salar]
contig_0204626	1..4411	0.32	-2.03	-4.08	0.00466	0.05	1	0.32	-1.5	-2.83	0.02	0.07	1		PREDICTED: GTPase IMAP family member 8-like [Salmo salar]
contig_0014295	1..1302	1.55	-2.04	-4.12	0.00088	0.01	1	1.55	-0.64	-1.56	0.15	0.31	1		PREDICTED: DCC-interacting protein 13-beta-like [Salmo salar]
contig_0045947	1..1218	4.43	-2.04	-4.11	6.6e-08	4.28e-06	0.02	4.43	-1.28	-2.43	5.15e-05	0.000679	1		PREDICTED: collagen alpha-1(VII) chain-like [Salmo salar]
contig_0096561	1..1921	2.23	-2.04	-4.12	3.32e-06	0.00014	0.9	2.23	-1.44	-2.72	0.000192	0.00206	1		PREDICTED: uncharacterized protein LOC106606354 [Salmo salar]
contig_0098283	1..395	5.09	-2.04	-4.12	0.00088	0.01	1	5.09	-1	-2	0.04	0.12	1		PREDICTED: ATP-binding cassette sub-family A member 3-like, partial [Salmo salar]
contig_0127677	1..2363	1.21	-2.04	-4.11	9.76e-05	0.00246	1	1.21	-1.99	-3.97	0.000147	0.00165	1		PREDICTED: hepatocyte growth factor-like [Salmo salar]
contig_0128483	1..761	2.64	-2.04	-4.12	0.00088	0.01	1	2.64	-0.81	-1.75	0.08	0.2	1		PREDICTED: ictacalcin-like [Salmo salar]
contig_0129477	1..1086	1.85	-2.04	-4.12	0.00088	0.01	1	1.85	-1.48	-2.79	0.00594	0.03	1		PREDICTED: eyes absent homolog 2-like isoform X1 [Salmo salar]
contig_0141845	1..285	15.05	-2.04	-4.12	3.32e-06	0.00014	0.9	15.05	-1.9	-3.73	9.9e-06	0.000166	1		not available
contig_0160371	1..3088	0.65	-2.04	-4.12	0.00088	0.01	1	0.65	-1.11	-2.15	0.02	0.09	1		PREDICTED: sushi, von Willebrand factor type A, EGF and pentraxin domain-containing protein 1-like isoform X3 [Salmo salar]
contig_0029400	1..1366	53.44	-2.05	-4.14	3.35e-42	3.76e-39	9.12e-37	53.44	-0.61	-1.53	3.92e-06	7.38e-05	1		decorin [Salmo salar]
contig_0148357	1..2404	1.08	-2.05	-4.14	0.000184	0.00411	1	1.08	-1.71	-3.28	0.000779	0.00648	1		PREDICTED: rab effector MyRIP-like isoform X3 [Salmo salar]
contig_0014899	1..6738	12.88	-2.06	-4.17	1.6e-45	2.11e-42	4.36e-40	12.88	-1.46	-2.75	2.76e-26	1.13e-23	7.36e-21		PREDICTED: collagen alpha-1(XVI) chain-like isoform X1 [Salmo salar]
contig_0019070	1..428	4.08	-2.06	-4.17	0.00176	0.02	1	5.3	0.56	1.47	0.15	0.31	1		PREDICTED: transmembrane protein 154-like isoform X1 [Salmo salar]
contig_0034631	1..360	6.47	-2.06	-4.18	0.000353	0.00692	1	6.47	-0.44	-1.36	0.28	0.47	1		PREDICTED: dolichyl-diphosphooligosaccharide--protein glycosyltransferase 48 kDa subunit-like [Salmo salar]
contig_0038157	1..1610	1.09	-2.06	-4.17	0.00176	0.02	1	1.09	-1.14	-2.21	0.03	0.11	1		UPF0527 membrane protein [Salmo salar]
contig_0097871	1..595	6.32	-2.06	-4.17	1.02e-05	0.000371	1	6.32	-0.29	-1.22	0.38	0.57	1		PREDICTED: myosin-7-like [Salmo salar]
contig_0108232	1..294	7.92	-2.06	-4.18	0.000353	0.00692	1	7.92	-0.07	-1.05	0.85	0.91	1		PREDICTED: procollagen C-endopeptidase enhancer 2-like [Salmo salar]
contig_0112637	1..1777	2.77	-2.06	-4.18	7.42e-07	3.79e-05	0.2	2.77	-0.75	-1.68	0.01	0.05	1		PREDICTED: protein mab-21-like 2 [Salmo salar]
contig_0113799	1..5107	0.34	-2.06	-4.17	0.00176	0.02	1	0.34	-1.79	-3.45	0.00399	0.02	1		PREDICTED: adhesion G protein-coupled receptor A3-like isoform X2 [Salmo salar]
contig_0161994	1..869	2.68	-2.06	-4.18	0.000353	0.00692	1	2.68	-0.85	-1.81	0.05	0.15	1		PREDICTED: semaphorin-3C-like [Salmo salar]
contig_0175180	1..1062	1.64	-2.06	-4.17	0.00176	0.02	1	1.64	-1.6	-3.03	0.00687	0.04	1		not available
contig_0226359	1..4011	0.79	-2.06	-4.16	4.19e-05	0.00122	1	0.79	-0.72	-1.64	0.06	0.16	1		PREDICTED: protocadherin-18-like isoform X1 [Salmo salar]
contig_0051697	1..5613	0.98	-2.07	-4.19	4.17e-08	2.83e-06	0.01	0.98	-0.81	-1.75	0.0044	0.03	1		PREDICTED: A disintegrin and metalloproteinase with thrombospondin motifs 12-like [Salmo salar]
contig_0056719	1..733	14.66	-2.07	-4.21	1.89e-13	2.93e-11	5.14e-08	14.66	-1.32	-2.5	3.73e-08	1.18e-06	0.00992		not available
contig_0057696	1..2679	2.39	-2.07	-4.21	4.09e-09	3.33e-07	0.00111	2.39	-1.35	-2.56	6e-06	0.000107	1		PREDICTED: zinc finger protein GLIS2-like [Salmo salar]
contig_0082553	1..3249	1.08	-2.07	-4.2	1.84e-05	0.00061	1	1.08	-1.28	-2.44	0.00156	0.01	1		PREDICTED: coronin-2B [Salmo salar]
contig_0156494	1..731	5.58	-2.07	-4.2	4.66e-06	0.000188	1	5.58	-0.83	-1.78	0.02	0.07	1		PREDICTED: glucose-6-phosphate isomerase-like [Salmo salar]
contig_0029061	1..539	2.75	-2.08	-4.23	0.00361	0.04	1	2.75	-0.56	-1.48	0.26	0.45	1		PREDICTED: zinc finger and SCAN domain-containing protein 2-like [Salmo salar]
contig_0034767	1..2143	0.69	-2.08	-4.23	0.00361	0.04	1	0.69	-1.55	-2.93	0.01	0.06	1		PREDICTED: interleukin-15 receptor subunit alpha isoform X2 [Salmo salar]
contig_0038619	1..635	2.33	-2.08	-4.23	0.00361	0.04	1	2.33	-0.28	-1.22	0.55	0.71	1		PREDICTED: solute carrier family 43 member 3-like isoform X2 [Salmo salar]
contig_0057535	1..1450	1.02	-2.08	-4.23	0.00361	0.04	1	1.02	-0.13	-1.09	0.79	0.88	1		PREDICTED: clathrin heavy chain 1-like isoform X4 [Salmo salar]
contig_0060263	1..1104	1.34	-2.08	-4.23	0.00361	0.04	1	1.34	-0.78	-1.72	0.14	0.29	1		PREDICTED: acidic leucine-rich nuclear phosphoprotein 32 family member B-like isoform X1 [Salmo salar]
contig_0069073	1..585	2.53	-2.08	-4.23	0.00361	0.04	1	2.53	-0.67	-1.59	0.19	0.36	1		zinc finger protein 180-like protein isoform X2 [Salmo salar]
contig_0085426	1..974	1.52	-2.08	-4.23	0.00361	0.04	1	1.52	-0.78	-1.72	0.14	0.29	1		PREDICTED: tripartite motif-containing protein 16-like [Salmo salar]
contig_0090518	1..649	4.08	-2.08	-4.23	0.000146	0.00341	1	4.08	0.04	1.03	0.92	0.95	1		PREDICTED: uncharacterized protein LOC106609370 [Salmo salar]
contig_0109887	1..1290	1.15	-2.08	-4.23	0.00361	0.04	1	1.15	-1.55	-2.93	0.01	0.06	1		PREDICTED: phospholipid-transporting ATPase 11C-like isoform X2 [Salmo salar]
contig_0114313	1..580	2.56	-2.08	-4.23	0.00361	0.04	1	2.56	-1.04	-2.06	0.06	0.17	1		not available
contig_0138347	1..918	1.61	-2.08	-4.23	0.00361	0.04	1	1.61	-0.46	-1.38	0.35	0.54	1		PREDICTED: nibrin-like [Salmo salar]
contig_0158370	1..1946	1.06	-2.08	-4.23	0.000691	0.01	1	1.06	-1.04	-2.05	0.03	0.11	1		PREDICTED: SET and MYND domain-containing protein 1 isoform X2 [Salmo salar]
contig_0162608	1..297	6.95	-2.08	-4.23	0.000691	0.01	1	8.07	0.39	1.31	0.29	0.48	1		not available
contig_0167928	1..500	2.96	-2.08	-4.23	0.00361	0.04	1	2.96	-1.77	-3.41	0.00794	0.04	1		not available
contig_0052287	1..864	28.31	-2.09	-4.27	3.16e-24	1.23e-21	8.6e-19	28.31	-0.58	-1.49	0.00038	0.00363	1		Mimecan precursor [Salmo salar]
contig_0061274	1..1029	10.03	-2.09	-4.27	3.58e-13	5.36e-11	9.73e-08	10.03	-1.56	-2.94	1.36e-09	5.92e-08	0.000361		PREDICTED: splicing factor 3A subunit 2-like [Salmo salar]
contig_0073724	1..753	3.94	-2.09	-4.27	6.16e-05	0.00169	1	3.94	-0.67	-1.59	0.08	0.2	1		Gap junction alpha-1 protein [Salmo salar]
contig_0107752	1..503	36.73	-2.09	-4.25	5.27e-20	1.58e-17	1.43e-14	36.73	-1.52	-2.87	1.2e-13	1.06e-11	3.18e-08		immunoglobulin heavy chain constant region, partial [Salmo salar]
contig_0109950	1..2493	2.12	-2.09	-4.25	2.93e-07	1.66e-05	0.08	2.12	-1.45	-2.74	1.26e-05	0.000203	1		PREDICTED: collagen alpha-1(I) chain-like [Salmo salar]
contig_0052433	1..1270	15.34	-2.1	-4.28	7.69e-21	2.41e-18	2.09e-15	15.34	-1.15	-2.22	1.17e-09	5.15e-08	0.00031		Mimecan precursor [Salmo salar]
contig_0057568	1..1892	3.13	-2.1	-4.28	1.12e-08	8.49e-07	0.00306	3.13	-1.24	-2.37	3.75e-05	0.000519	1		not available
contig_0062466	1..707	3.37	-2.1	-4.28	0.000279	0.00574	1	3.37	-0.6	-1.51	0.15	0.3	1		PREDICTED: MDS1 and EVI1 complex locus protein EVI1-like isoform X15 [Salmo salar]
contig_0074749	1..249	7.23	-2.1	-4.29	0.00138	0.02	1	7.23	-1.47	-2.77	0.00916	0.04	1		PREDICTED: ATP-dependent RNA helicase DDX3Y-like isoform X1 [Salmo salar]
contig_0112165	1..376	4.79	-2.1	-4.29	0.00138	0.02	1	4.79	-1.64	-3.12	0.00539	0.03	1		Tubulin beta-2A chain [Salmo salar]
contig_0133277	1..1259	1.43	-2.1	-4.29	0.00138	0.02	1	1.43	-1.47	-2.77	0.00916	0.04	1		PREDICTED: myosin-10-like isoform X2 [Salmo salar]
contig_0133464	1..946	1.9	-2.1	-4.29	0.00138	0.02	1	1.9	-7.79	-221.67	0.07	0.19	1		PREDICTED: rho guanine nucleotide exchange factor 2-like isoform X1 [Salmo salar]
contig_0156142	1..648	3.68	-2.1	-4.28	0.000279	0.00574	1	3.68	-0.97	-1.95	0.03	0.1	1		PREDICTED: probable E3 ubiquitin-protein ligase HERC1, partial [Salmo salar]
contig_0157067	1..608	2.96	-2.1	-4.29	0.00138	0.02	1	2.96	-1.06	-2.09	0.04	0.12	1		PREDICTED: protein CLN8 [Salmo salar]
contig_0222696	1..571	37.83	-2.1	-4.29	2.19e-22	7.63e-20	5.95e-17	37.83	-1.5	-2.82	1.1e-14	1.16e-12	2.92e-09		not available
contig_0002411	1..5268	2.54	-2.11	-4.31	4.61e-16	9.45e-14	1.25e-10	2.54	-1.85	-3.6	8.02e-14	7.28e-12	2.14e-08		PREDICTED: platelet-derived growth factor receptor alpha-like [Salmo salar]
contig_0043529	1..10559	1.58	-2.11	-4.31	8.2e-19	2.21e-16	2.23e-13	1.58	-1.82	-3.53	8.09e-16	1.02e-13	2.15e-10		PREDICTED: chondroitin sulfate proteoglycan 4 [Salmo salar]
contig_0063447	1..1068	14.77	-2.11	-4.31	4.42e-18	1.14e-15	1.2e-12	14.77	-1.28	-2.42	6.7e-10	3.1e-08	0.000178		not available
contig_0073250	1..4413	5.79	-2.11	-4.31	4.27e-25	1.81e-22	1.16e-19	5.79	-1.06	-2.08	7.27e-10	3.33e-08	0.000194		PREDICTED: fibrillin-2-like [Salmo salar]
contig_0074893	1..828	3.26	-2.11	-4.31	0.000116	0.00282	1	3.26	-1.91	-3.75	0.00029	0.0029	1		PREDICTED: beta-1,4-galactosyltransferase 6-like [Salmo salar]
contig_0083105	1..2783	1.29	-2.11	-4.32	1.18e-05	0.000418	1	1.29	-1.56	-2.95	0.000255	0.0026	1		PREDICTED: neuronal migration protein doublecortin-like isoform X1 [Salmo salar]
contig_0109046	1..325	12.87	-2.11	-4.31	3.03e-06	0.000128	0.82	12.87	-1.11	-2.16	0.00228	0.02	1		PREDICTED: collagen alpha-6(VI) chain-like [Salmo salar]
contig_0015314	1..1236	1.71	-2.12	-4.34	0.000543	0.00965	1	1.71	-1.71	-3.26	0.00219	0.01	1		not available
contig_0023207	1..1616	1.31	-2.12	-4.34	0.000543	0.00965	1	1.31	-0.43	-1.34	0.31	0.5	1		PREDICTED: homeobox protein BarH-like 2 [Salmo salar]
contig_0029981	1..2837	0.75	-2.12	-4.34	0.000543	0.00965	1	0.75	-0.64	-1.56	0.14	0.3	1		PREDICTED: putative all-trans-retinol 13,14-reductase [Salmo salar]
contig_0035565	1..895	4.38	-2.12	-4.34	5.32e-06	0.00021	1	4.38	-0.53	-1.44	0.12	0.26	1		PREDICTED: lysyl oxidase homolog 1-like [Salmo salar]
contig_0038871	1..4533	3.25	-2.12	-4.35	2.68e-17	6.36e-15	7.28e-12	3.25	-1.1	-2.14	8.34e-08	2.43e-06	0.02		PREDICTED: scavenger receptor class A member 5-like [Salmo salar]
contig_0164553	1..1797	1.18	-2.12	-4.34	0.000543	0.00965	1	1.18	-1.3	-2.45	0.01	0.05	1		PREDICTED: short-chain dehydrogenase/reductase 3-like [Salmo salar]
contig_0005677	1..6271	1.45	-2.13	-4.39	3.53e-12	4.68e-10	9.61e-07	1.45	-1.47	-2.77	3.06e-08	9.91e-07	0.00816		not available
contig_0041277	1..913	1.68	-2.13	-4.38	0.00281	0.03	1	1.68	-1.24	-2.37	0.03	0.11	1		not available
contig_0056458	1..1214	3.01	-2.13	-4.39	9.45e-06	0.000347	1	3.01	-0.67	-1.6	0.06	0.16	1		PREDICTED: UDP-N-acetylglucosamine transporter-like isoform X3 [Salmo salar]
contig_0058665	1..1557	0.99	-2.13	-4.38	0.00281	0.03	1	0.99	-0.96	-1.94	0.07	0.2	1		PREDICTED: homeobox protein SIX5-like [Salmo salar]
contig_0080860	1..1142	1.34	-2.13	-4.38	0.00281	0.03	1	1.34	-0.61	-1.53	0.22	0.4	1		vacuolar protein sorting 52 [Salmo salar]
contig_0089134	1..1587	4.4	-2.13	-4.39	5.88e-10	5.54e-08	0.00016	4.4	-0.17	-1.12	0.46	0.64	1		glycogen phosphorylase [Salmo salar]
contig_0106258	1..716	3.4	-2.13	-4.37	0.00022	0.00476	1	3.4	-1.91	-3.75	0.000535	0.00479	1		PREDICTED: histone-lysine N-methyltransferase 2A-like isoform X2 [Salmo salar]
contig_0110317	1..604	2.54	-2.13	-4.38	0.00281	0.03	1	3.65	0.7	1.63	0.08	0.2	1		not available
contig_0121239	1..1758	0.87	-2.13	-4.38	0.00281	0.03	1	0.87	-1.6	-3.03	0.01	0.05	1		PREDICTED: pituitary adenylate cyclase-activating polypeptide type I receptor-like [Salmo salar]
contig_0136758	1..1223	1.26	-2.13	-4.38	0.00281	0.03	1	1.26	-0.03	-1.02	0.94	0.97	1		PREDICTED: myosin-7B isoform X1 [Salmo salar]
contig_0146208	1..1757	0.87	-2.13	-4.38	0.00281	0.03	1	0.87	-1.6	-3.03	0.01	0.05	1		PREDICTED: A disintegrin and metalloproteinase with thrombospondin motifs 20-like isoform X1 [Salmo salar]
contig_0253346	1..230	6.67	-2.13	-4.38	0.00281	0.03	1	6.67	-0.72	-1.65	0.16	0.32	1		not available
contig_0263058	1..200	7.68	-2.13	-4.38	0.00281	0.03	1	7.68	-0.72	-1.65	0.16	0.32	1		PREDICTED: uncharacterized protein LOC106605577 [Salmo salar]
contig_0087859	1..5974	1.13	-2.14	-4.42	1.07e-09	9.68e-08	0.000292	1.13	-1.09	-2.14	7.65e-05	0.000949	1		PREDICTED: integrin alpha-11-like [Salmo salar]
contig_0107534	1..1662	1.66	-2.14	-4.4	9.17e-05	0.00234	1	1.66	-1.01	-2.02	0.02	0.07	1		PREDICTED: tenascin-like [Salmo salar]
contig_0126760	1..616	3.01	-2.14	-4.42	0.00108	0.02	1	3.01	-0.99	-1.99	0.05	0.14	1		not available
contig_0023718	1..244	8.9	-2.15	-4.44	0.000427	0.00802	1	8.9	-0.34	-1.26	0.41	0.59	1		PREDICTED: zinc finger MYM-type protein 1-like isoform X1 [Salmo salar]
contig_0044100	1..2776	0.78	-2.15	-4.44	0.000427	0.00802	1	0.78	-1.11	-2.16	0.02	0.08	1		PREDICTED: WD repeat and FYVE domain-containing protein 3-like [Salmo salar]
contig_0065505	1..898	2.42	-2.15	-4.44	0.000427	0.00802	1	2.42	-1.74	-3.34	0.00173	0.01	1		not available
contig_0114562	1..1335	1.63	-2.15	-4.44	0.000427	0.00802	1	1.63	-0.92	-1.89	0.04	0.14	1		PREDICTED: uncharacterized protein LOC106566581 isoform X2 [Salmo salar]
contig_0116567	1..2666	0.81	-2.15	-4.44	0.000427	0.00802	1	0.81	-0.92	-1.89	0.04	0.14	1		PREDICTED: netrin-G2 isoform X3 [Salmo salar]
contig_0129703	1..1019	2.13	-2.15	-4.44	0.000427	0.00802	1	2.13	-0.46	-1.38	0.27	0.45	1		PREDICTED: protein phosphatase 1 regulatory subunit 12A-like isoform X7 [Salmo salar]
contig_0140607	1..2049	1.65	-2.15	-4.43	1.7e-05	0.000571	1	1.65	-0.66	-1.58	0.07	0.19	1		PREDICTED: kin of IRRE-like protein 1 isoform X1 [Salmo salar]
contig_0154802	1..1692	2	-2.15	-4.43	1.7e-05	0.000571	1	2	-0.11	-1.08	0.75	0.86	1		PREDICTED: sarcalumenin-like [Salmo salar]
contig_0188745	1..3254	0.67	-2.15	-4.44	0.000427	0.00802	1	0.67	-0.75	-1.68	0.09	0.22	1		PREDICTED: leucine-rich repeat neuronal protein 3-like [Salmo salar]
contig_0033747	1..443	47.2	-2.16	-4.46	1.74e-22	6.13e-20	4.72e-17	47.2	-1.33	-2.52	2.35e-12	1.74e-10	6.26e-07		PREDICTED: uncharacterized protein LOC106586840, partial [Salmo salar]
contig_0075106	1..219	12.81	-2.16	-4.48	7.28e-05	0.00194	1	12.81	-1.96	-3.89	0.000184	0.00199	1		PREDICTED: complement C1r subcomponent-like [Salmo salar]
contig_0092580	1..4754	8.3	-2.16	-4.47	1.64e-33	1.19e-30	4.46e-28	8.3	-1.66	-3.15	2.39e-23	7.48e-21	6.36e-18		PREDICTED: solute carrier family 12 member 3-like [Salmo salar]
contig_0131172	1..1549	2.6	-2.16	-4.46	3.44e-06	0.000144	0.94	2.6	-1.17	-2.25	0.00182	0.01	1		PREDICTED: telethonin-like [Salmo salar]
contig_0138146	1..1089	2.28	-2.16	-4.46	0.000174	0.00393	1	2.28	-1.03	-2.04	0.02	0.08	1		not available
contig_0033374	1..2028	12.69	-2.17	-4.49	5.88e-26	2.58e-23	1.6e-20	12.69	-0.86	-1.82	2.31e-07	6.08e-06	0.06		PREDICTED: secreted frizzled-related protein 3-like isoform X1 [Salmo salar]
contig_0127969	1..326	9.58	-2.17	-4.49	3.12e-05	0.000957	1	9.58	-0.64	-1.56	0.09	0.21	1		Catechol O-methyltransferase [Salmo salar]
contig_0147684	1..1272	2.95	-2.17	-4.51	6.1e-06	0.000237	1	2.95	-0.76	-1.69	0.03	0.11	1		PREDICTED: carbamoyl-phosphate synthase [ammonia], mitochondrial [Salmo salar]
contig_0034632	1..410	4.65	-2.18	-4.54	0.000845	0.01	1	4.65	-0.28	-1.21	0.52	0.68	1		PREDICTED: DNA-dependent protein kinase catalytic subunit [Salmo salar]
contig_0053444	1..787	6.79	-2.18	-4.54	1.43e-07	8.7e-06	0.04	6.79	-0.61	-1.53	0.03	0.1	1		PREDICTED: ribonuclease-like 3, partial [Salmo salar]
contig_0053597	1..1217	1.3	-2.18	-4.53	0.00219	0.03	1	1.3	-0.47	-1.39	0.32	0.51	1		Deoxyribonuclease gamma precursor [Salmo salar]
contig_0054980	1..341	4.66	-2.18	-4.53	0.00219	0.03	1	4.66	-1.87	-3.65	0.00482	0.03	1		UPF0527 membrane protein [Salmo salar]
contig_0062485	1..4151	1.36	-2.18	-4.54	1.27e-08	9.49e-07	0.00346	1.36	-1.78	-3.43	3.66e-07	9.17e-06	0.1		PREDICTED: A disintegrin and metalloproteinase with thrombospondin motifs 17-like, partial [Salmo salar]
contig_0081937	1..1514	1.05	-2.18	-4.53	0.00219	0.03	1	1.05	-0.56	-1.48	0.25	0.43	1		PREDICTED: zinc finger protein 732-like [Salmo salar]
contig_0085234	1..825	5.33	-2.18	-4.53	1.29e-06	6.15e-05	0.35	5.33	-1.54	-2.92	8.07e-05	0.000992	1		not available
contig_0107635	1..1307	1.46	-2.18	-4.54	0.000845	0.01	1	1.88	0.55	1.46	0.14	0.3	1		PREDICTED: laminin subunit beta-1-like [Salmo salar]
contig_0119883	1..1817	2.24	-2.18	-4.52	2.78e-06	0.000119	0.76	2.24	-1.19	-2.28	0.00151	0.01	1		PREDICTED: forkhead box protein D1 [Salmo salar]
contig_0122030	1..601	3.17	-2.18	-4.54	0.000845	0.01	1	3.17	-0.82	-1.77	0.08	0.21	1		PREDICTED: uncharacterized protein LOC106597293 [Salmo salar]
contig_0132371	1..1427	2.86	-2.18	-4.52	2.78e-06	0.000119	0.76	2.86	-1.74	-3.34	3.83e-05	0.000528	1		PREDICTED: rho guanine nucleotide exchange factor 7-like, partial [Salmo salar]
contig_0159922	1..806	1.97	-2.18	-4.53	0.00219	0.03	1	2.43	0.48	1.39	0.24	0.42	1		PREDICTED: peptide YY [Salmo salar]
contig_0169217	1..1080	1.47	-2.18	-4.53	0.00219	0.03	1	1.47	-1.14	-2.21	0.04	0.12	1		PREDICTED: ras-associated and pleckstrin homology domains-containing protein 1-like, partial [Salmo salar]
contig_0187629	1..386	4.94	-2.18	-4.54	0.000845	0.01	1	4.94	-1.72	-3.3	0.00332	0.02	1		PREDICTED: tetraspanin-5 isoform X2 [Salmo salar]
contig_0276129	1..568	12.68	-2.18	-4.53	2.44e-10	2.45e-08	6.63e-05	12.68	-1.1	-2.14	4.52e-05	0.000607	1		not available
contig_0038324	1..267	10.71	-2.19	-4.56	5.79e-05	0.00161	1	10.71	-0.41	-1.33	0.26	0.45	1		not available
contig_0052422	1..557	5.7	-2.19	-4.57	2.49e-05	0.000793	1	5.7	-0.3	-1.23	0.39	0.57	1		PREDICTED: desmin-like [Salmo salar]
contig_0067520	1..493	8.38	-2.19	-4.58	2.24e-06	9.94e-05	0.61	8.38	-1.09	-2.14	0.00272	0.02	1		tropomodulin 4 [Salmo salar]
contig_0076958	1..689	9.6	-2.19	-4.55	1.01e-09	9.17e-08	0.000275	9.6	-1.67	-3.18	1.48e-07	4.08e-06	0.04		PREDICTED: iroquois-class homeodomain protein irx-3-like [Salmo salar]
contig_0090519	1..273	11.63	-2.19	-4.57	2.49e-05	0.000793	1	11.63	-0.52	-1.43	0.15	0.31	1		PREDICTED: uncharacterized protein LOC106609370 [Salmo salar]
contig_0098209	1..2154	1.77	-2.19	-4.58	4.9e-06	0.000195	1	1.77	-1.92	-3.79	2.34e-05	0.000346	1		SPATA5 [Salmo salar]
contig_0160766	1..1986	1.6	-2.19	-4.57	2.49e-05	0.000793	1	1.6	-1.66	-3.16	0.000316	0.00311	1		PREDICTED: bone morphogenetic protein 10-like [Salmo salar]
contig_0062005	1..807	43.29	-2.2	-4.61	5.79e-32	3.72e-29	1.57e-26	43.29	-1.25	-2.37	1.44e-14	1.5e-12	3.82e-09		Fatty acid-binding protein, brain [Salmo salar]
contig_0065262	1..4194	8.84	-2.2	-4.59	5.04e-33	3.58e-30	1.37e-27	8.84	-0.8	-1.74	1.34e-07	3.73e-06	0.04		PREDICTED: cadherin-11-like [Salmo salar]
contig_0255581	1..582	14.19	-2.2	-4.59	1.43e-11	1.73e-09	3.9e-06	14.19	-1.3	-2.46	1.06e-06	2.36e-05	0.28		not available
contig_0039444	1..1986	14.1	-2.21	-4.61	6.49e-28	3.2e-25	1.76e-22	14.1	-1.13	-2.19	2.28e-11	1.41e-09	6.07e-06		PREDICTED: collagen alpha-1(XII) chain-like isoform X2 [Salmo salar]
contig_0077610	1..1587	2.84	-2.21	-4.64	8.44e-07	4.24e-05	0.23	2.84	-0.89	-1.85	0.00472	0.03	1		EGF-containing fibulin-like extracellular matrix protein 2 precursor [Salmo salar]
contig_0109450	1..7233	1.9	-2.21	-4.62	5.15e-17	1.17e-14	1.4e-11	1.9	-0.55	-1.46	0.00419	0.02	1		PREDICTED: nebulin [Salmo salar]
contig_0188327	1..1640	2.74	-2.21	-4.64	8.44e-07	4.24e-05	0.23	2.74	-0.85	-1.8	0.00659	0.04	1		Cellular retinoic acid-binding protein [Salmo salar]
contig_0044593	1..1396	4.17	-2.22	-4.67	6.48e-09	5.12e-07	0.00176	4.17	-0.99	-1.98	0.000577	0.00509	1		PREDICTED: laminin subunit alpha-4-like [Salmo salar]
contig_0059949	1..3005	4.6	-2.22	-4.65	3.49e-17	8.12e-15	9.48e-12	4.6	-1.81	-3.51	7.74e-14	7.06e-12	2.06e-08		PREDICTED: cadherin-like protein 26 [Salmo salar]
contig_0062743	1..4207	0.47	-2.22	-4.67	0.000664	0.01	1	0.47	-1.59	-3.02	0.00447	0.03	1		PREDICTED: plexin-A4-like, partial [Salmo salar]
contig_0091227	1..1054	1.86	-2.22	-4.67	0.000664	0.01	1	1.86	-0.68	-1.61	0.13	0.29	1		not available
contig_0130604	1..3395	0.67	-2.22	-4.66	0.000266	0.00553	1	0.67	-0.99	-1.98	0.03	0.1	1		PREDICTED: collagen alpha-1(XVIII) chain-like isoform X6 [Salmo salar]
contig_0149884	1..1318	1.97	-2.22	-4.65	0.000109	0.0027	1	1.97	-1.59	-3.01	0.00131	0.00994	1		aryl hydrocarbon receptor 1 beta-like protein [Salmo salar]
contig_0163159	1..1084	2.39	-2.22	-4.65	0.000109	0.0027	1	2.39	-1.27	-2.41	0.00564	0.03	1		PREDICTED: MDS1 and EVI1 complex locus protein EVI1-like isoform X14 [Salmo salar]
contig_0164021	1..495	3.96	-2.22	-4.67	0.000664	0.01	1	3.96	-1.59	-3.02	0.00447	0.03	1		PREDICTED: voltage-dependent N-type calcium channel subunit alpha-1B-like isoform X2 [Salmo salar]
contig_0204143	1..1921	1.52	-2.22	-4.65	4.61e-05	0.00132	1	1.52	-1.26	-2.39	0.00391	0.02	1		PREDICTED: T-box transcription factor TBX3-like isoform X2 [Salmo salar]
contig_0037439	1..1260	1.3	-2.23	-4.68	0.00171	0.02	1	1.3	-1.92	-3.77	0.00376	0.02	1		Transforming growth factor beta-1-induced transcript 1 protein [Salmo salar]
contig_0059197	1..783	2.1	-2.23	-4.68	0.00171	0.02	1	2.1	-1.05	-2.08	0.05	0.14	1		PREDICTED: glutamine--fructose-6-phosphate aminotransferase [isomerizing] 2-like [Salmo salar]
contig_0064397	1..1226	1.08	-2.23	-4.7	0.00456	0.05	1	1.08	-0.62	-1.54	0.24	0.43	1		collagen Type XI Alpha2 [Salmo salar]
contig_0077845	1..1107	1.2	-2.23	-4.7	0.00456	0.05	1	1.2	-1.2	-2.3	0.05	0.15	1		PREDICTED: calcium/calmodulin-dependent protein kinase type II subunit beta-like [Salmo salar]
contig_0083518	1..471	3.48	-2.23	-4.68	0.00171	0.02	1	3.48	-0.93	-1.9	0.07	0.19	1		not available
contig_0085879	1..2104	0.63	-2.23	-4.7	0.00456	0.05	1	0.63	-1.86	-3.64	0.0097	0.05	1		PREDICTED: helicase with zinc finger domain 2-like [Salmo salar]
contig_0092464	1..373	12.21	-2.23	-4.69	6.84e-07	3.54e-05	0.19	12.21	-1.29	-2.44	0.000424	0.00398	1		PREDICTED: GON-4-like protein isoform X1 [Salmo salar]
contig_0097860	1..374	32.13	-2.23	-4.7	1.43e-15	2.78e-13	3.88e-10	32.13	-1.61	-3.05	4.77e-11	2.79e-09	1.27e-05		PREDICTED: ral guanine nucleotide dissociation stimulator-like 1 isoform X1 [Salmo salar]
contig_0109367	1..209	7.85	-2.23	-4.68	0.00171	0.02	1	7.85	-0.52	-1.43	0.28	0.46	1		Alpha-actinin-1 [Salmo salar]
contig_0111782	1..1016	1.62	-2.23	-4.68	0.00171	0.02	1	1.62	-0.71	-1.63	0.15	0.31	1		PREDICTED: protein NLRC3-like [Salmo salar]
contig_0126539	1..928	1.43	-2.23	-4.7	0.00456	0.05	1	1.43	-1.61	-3.05	0.02	0.07	1		PREDICTED: brefeldin A-inhibited guanine nucleotide-exchange protein 2-like [Salmo salar]
contig_0129136	1..675	2.43	-2.23	-4.68	0.00171	0.02	1	2.43	-1.34	-2.53	0.02	0.08	1		not available
contig_0143796	1..418	3.17	-2.23	-4.7	0.00456	0.05	1	3.17	-0.3	-1.23	0.55	0.71	1		PREDICTED: kelch-like protein 41b [Salmo salar]
contig_0146480	1..536	2.47	-2.23	-4.7	0.00456	0.05	1	2.47	-1.03	-2.04	0.08	0.2	1		PREDICTED: uncharacterized protein LOC106602745 [Salmo salar]
contig_0149198	1..925	1.43	-2.23	-4.7	0.00456	0.05	1	1.43	-1.61	-3.05	0.02	0.07	1		PREDICTED: PHD finger protein 21A-like isoform X6 [Salmo salar]
contig_0212944	1..617	2.14	-2.23	-4.7	0.00456	0.05	1	2.14	-1.39	-2.62	0.03	0.1	1		PREDICTED: radical S-adenosyl methionine domain-containing protein 2-like [Salmo salar]
contig_0232566	1..1493	1.1	-2.23	-4.68	0.00171	0.02	1	1.1	-1.7	-3.24	0.00653	0.03	1		Major facilitator superfamily domain-containing protein 2 [Salmo salar]
contig_0042998	1..554	53.7	-2.24	-4.74	1.52e-29	8.48e-27	4.14e-24	53.7	-1.68	-3.2	1.68e-20	3.8e-18	4.47e-15		C-C motif chemokine 21 precursor [Salmo salar]
contig_0066057	1..4975	0.99	-2.24	-4.73	2.65e-07	1.51e-05	0.07	0.99	-1.35	-2.54	5.71e-05	0.000742	1		PREDICTED: xin actin-binding repeat-containing protein 1-like isoform X1 [Salmo salar]
contig_0071028	1..2441	1.21	-2.24	-4.73	3.68e-05	0.0011	1	1.21	-0.37	-1.3	0.3	0.49	1		PREDICTED: discoidin domain-containing receptor 2-like isoform X1 [Salmo salar]
contig_0108156	1..233	12.72	-2.24	-4.73	3.68e-05	0.0011	1	12.72	-1.37	-2.58	0.00201	0.01	1		PREDICTED: protein furry homolog-like isoform X14 [Salmo salar]
contig_0119739	1..2173	1.36	-2.24	-4.73	3.68e-05	0.0011	1	1.36	-1.12	-2.18	0.00748	0.04	1		PREDICTED: laminin subunit beta-1-like [Salmo salar]
contig_0124806	1..697	9.87	-2.24	-4.74	3.37e-10	3.32e-08	9.16e-05	9.87	-0.78	-1.72	0.00239	0.02	1		PREDICTED: microfibrillar-associated protein 5-like [Salmo salar]
contig_0014239	1..2538	2.59	-2.25	-4.74	7.7e-10	7.08e-08	0.000209	2.59	-1.56	-2.96	4.93e-07	1.19e-05	0.13		PREDICTED: zinc finger CCCH domain-containing protein 11A-like isoform X4 [Salmo salar]
contig_0021526	1..4178	10.93	-2.25	-4.77	3.24e-38	3.09e-35	8.82e-33	10.93	-1.26	-2.4	1.07e-16	1.5e-14	2.84e-11		PREDICTED: fibrillin-2-like [Salmo salar]
contig_0087464	1..928	4.96	-2.25	-4.74	5.54e-07	2.94e-05	0.15	4.96	-1.1	-2.14	0.000728	0.00614	1		PREDICTED: uncharacterized protein LOC106582079 [Salmo salar]
contig_0110915	1..2054	4.95	-2.25	-4.74	8.87e-14	1.44e-11	2.41e-08	4.95	-1.72	-3.3	1.39e-10	7.39e-09	3.7e-05		PREDICTED: collagen alpha-1(XXII) chain-like [Salmo salar]
contig_0138982	1..1963	1.19	-2.25	-4.77	0.000211	0.00459	1	1.19	-0.93	-1.91	0.04	0.12	1		PREDICTED: ovochymase-2 [Salmo salar]
contig_0301819	1..385	11.14	-2.25	-4.75	1.18e-06	5.68e-05	0.32	11.14	-0.32	-1.25	0.26	0.45	1		PREDICTED: uncharacterized protein LOC106608566 [Salmo salar]
contig_0042007	1..1615	14.09	-2.26	-4.78	6.52e-25	2.72e-22	1.77e-19	14.09	-1.84	-3.58	1.34e-19	2.71e-17	3.58e-14		PREDICTED: peptidyl-prolyl cis-trans isomerase FKBP9-like [Salmo salar]
contig_0057633	1..9216	6.52	-2.26	-4.79	3.59e-44	4.51e-41	9.76e-39	6.52	-1.88	-3.69	5.13e-34	3.7e-31	1.36e-28		PREDICTED: LOW QUALITY PROTEIN: sodium channel protein type 4 subunit alpha B-like [Salmo salar]
contig_0081337	1..1365	1.47	-2.26	-4.79	0.000523	0.00941	1	1.47	-0.64	-1.56	0.15	0.31	1		PREDICTED: twist-related protein 2-like [Salmo salar]
contig_0098656	1..602	57.16	-2.26	-4.8	1.34e-32	9.12e-30	3.65e-27	57.16	-1.4	-2.63	4.37e-17	6.42e-15	1.16e-11		E3 ubiquitin-protein ligase LINCR [Salmo salar]
contig_0138649	1..3158	0.64	-2.26	-4.79	0.000523	0.00941	1	0.64	-1.48	-2.79	0.00594	0.03	1		PREDICTED: alpha-2,8-sialyltransferase 8E isoform X1 [Salmo salar]
contig_0202715	1..1545	1.3	-2.26	-4.79	0.000523	0.00941	1	1.3	-0.9	-1.87	0.06	0.16	1		PREDICTED: growth arrest-specific protein 1-like [Salmo salar]
contig_0008132	1..1099	426.58	-2.27	-4.83	2.85e-78	9.11e-75	7.76e-73	426.58	-1.86	-3.64	1.95e-54	2.73e-51	5.2e-49		not available
contig_0087055	1..370	4.58	-2.27	-4.83	0.00134	0.02	1	4.58	-1.1	-2.14	0.04	0.12	1		PREDICTED: sarcoplasmic/endoplasmic reticulum calcium ATPase 1 isoform X3 [Salmo salar]
contig_0135245	1..1867	0.91	-2.27	-4.83	0.00134	0.02	1	0.91	-1.74	-3.35	0.0051	0.03	1		PREDICTED: peripheral-type benzodiazepine receptor-associated protein 1-like isoform X2 [Salmo salar]
contig_0140225	1..244	17.79	-2.27	-4.81	9.56e-07	4.72e-05	0.26	17.79	-1.83	-3.56	1.35e-05	0.000216	1		not available
contig_0171300	1..1738	0.97	-2.27	-4.83	0.00134	0.02	1	0.97	-1.55	-2.93	0.00877	0.04	1		not available
contig_0191906	1..1450	1.17	-2.27	-4.83	0.00134	0.02	1	1.17	-0.32	-1.25	0.48	0.66	1		PREDICTED: uncharacterized protein LOC106609042 [Salmo salar]
contig_0237694	1..1888	0.9	-2.27	-4.83	0.00134	0.02	1	0.9	-0.56	-1.48	0.23	0.42	1		PREDICTED: alcohol dehydrogenase 1-like [Salmo salar]
contig_0060245	1..807	3.35	-2.28	-4.84	6.92e-05	0.00186	1	3.35	-1.06	-2.09	0.01	0.06	1		Transposable element Tcb1 transposase [Salmo salar]
contig_0068084	1..1336	8.8	-2.28	-4.86	1.44e-15	2.79e-13	3.9e-10	8.8	-1.72	-3.28	1.15e-11	7.52e-10	3.07e-06		PREDICTED: collagen alpha-1(V) chain-like isoform X2 [Salmo salar]
contig_0070381	1..2402	1.12	-2.28	-4.84	6.92e-05	0.00186	1	1.12	-0.59	-1.51	0.13	0.28	1		PREDICTED: puratrophin-1-like [Salmo salar]
contig_0074217	1..1730	2.54	-2.28	-4.87	7.74e-07	3.94e-05	0.21	2.54	-1.29	-2.45	0.000489	0.00446	1		not available
contig_0120239	1..1631	1.66	-2.28	-4.84	6.92e-05	0.00186	1	1.97	0.43	1.35	0.2	0.37	1		PREDICTED: laminin subunit beta-1 [Salmo salar]
contig_0130556	1..380	7.1	-2.28	-4.84	6.92e-05	0.00186	1	7.97	0.34	1.27	0.31	0.49	1		not available
contig_0153335	1..1926	2.45	-2.28	-4.85	3.65e-07	2.03e-05	0.1	2.45	-1.95	-3.86	3.18e-06	6.16e-05	0.85		PREDICTED: serine protease 23-like [Salmo salar]
contig_0172725	1..2368	1.14	-2.28	-4.84	6.92e-05	0.00186	1	1.14	-1.77	-3.41	0.000494	0.00448	1		PREDICTED: arylsulfatase I-like [Salmo salar]
contig_0051333	1..1060	1.3	-2.29	-4.88	0.00355	0.04	1	1.3	-1.92	-3.79	0.00752	0.04	1		FGF2 [Salmo salar]
contig_0055893	1..1806	0.76	-2.29	-4.88	0.00355	0.04	1	0.76	-0.94	-1.91	0.1	0.23	1		PREDICTED: clathrin heavy chain 1-like isoform X4 [Salmo salar]
contig_0069971	1..1325	1.8	-2.29	-4.88	0.000167	0.0038	1	1.8	-0.73	-1.66	0.08	0.21	1		PREDICTED: DNA polymerase subunit gamma-1 [Salmo salar]
contig_0084577	1..465	5.12	-2.29	-4.88	0.000167	0.0038	1	5.12	-1.35	-2.55	0.00531	0.03	1		not available
contig_0089670	1..2561	0.54	-2.29	-4.88	0.00355	0.04	1	0.54	-1.66	-3.17	0.01	0.06	1		PREDICTED: ribonuclease-like 3, partial [Salmo salar]
contig_0091506	1..1151	1.2	-2.29	-4.88	0.00355	0.04	1	1.2	-1.92	-3.79	0.00752	0.04	1		PREDICTED: tetratricopeptide repeat protein 4-like [Salmo salar]
contig_0099729	1..1282	1.07	-2.29	-4.88	0.00355	0.04	1	1.07	-1.09	-2.12	0.06	0.17	1		PREDICTED: centromere protein R-like isoform X1 [Salmo salar]
contig_0140440	1..889	1.55	-2.29	-4.88	0.00355	0.04	1	1.55	-1.09	-2.12	0.06	0.17	1		PREDICTED: FACT complex subunit SPT16-like isoform X2 [Salmo salar]
contig_0145801	1..386	6.17	-2.29	-4.88	0.000167	0.0038	1	6.17	-1.73	-3.31	0.00115	0.00896	1		PREDICTED: uncharacterized protein LOC106573259 [Salmo salar]
contig_0157974	1..478	2.88	-2.29	-4.88	0.00355	0.04	1	2.88	-1.09	-2.12	0.06	0.17	1		PREDICTED: vacuolar protein sorting-associated protein 54-like isoform X2 [Salmo salar]
contig_0169361	1..724	1.9	-2.29	-4.88	0.00355	0.04	1	1.9	-1.66	-3.17	0.01	0.06	1		PREDICTED: dihydropyrimidine dehydrogenase [NADP(+)] [Salmo salar]
contig_0201458	1..1747	0.79	-2.29	-4.88	0.00355	0.04	1	0.79	-1.66	-3.17	0.01	0.06	1		PREDICTED: E3 ubiquitin-protein ligase ZNRF3-like isoform X1 [Salmo salar]
contig_0225110	1..1793	0.77	-2.29	-4.88	0.00355	0.04	1	0.77	-1.92	-3.79	0.00752	0.04	1		PREDICTED: clathrin heavy chain 1-like isoform X4 [Salmo salar]
contig_0068674	1..1255	8.65	-2.3	-4.91	1.01e-14	1.81e-12	2.75e-09	8.65	-1.66	-3.16	1.2e-10	6.45e-09	3.2e-05		PREDICTED: endothelin-1 receptor-like [Salmo salar]
contig_0077534	1..416	4.96	-2.3	-4.92	0.000413	0.00784	1	4.96	-0.46	-1.37	0.28	0.47	1		Nuclear factor interleukin-3-regulated protein [Salmo salar]
contig_0021154	1..1794	13.16	-2.31	-4.96	4.23e-26	1.89e-23	1.15e-20	14.62	0.33	1.26	0.03	0.1	1		aldolase a, fructose-bisphosphate 1 [Salmo salar]
contig_0054418	1..3037	4.62	-2.31	-4.95	5.88e-18	1.5e-15	1.6e-12	4.62	-1.91	-3.77	8.24e-15	8.92e-13	2.19e-09		PREDICTED: collagen alpha-1(II) chain isoform X2 [Salmo salar]
contig_0119122	1..494	6.97	-2.31	-4.95	8.22e-06	0.000307	1	6.97	-1	-2	0.00931	0.05	1		PREDICTED: inter-alpha-trypsin inhibitor heavy chain H6-like isoform X1 [Salmo salar]
contig_0008923	1..2203	3.92	-2.32	-4.99	1.98e-12	2.72e-10	5.38e-07	3.92	-1.49	-2.8	4.62e-08	1.43e-06	0.01		PREDICTED: coiled-coil domain-containing protein 80-like [Salmo salar]
contig_0106130	1..1375	1.27	-2.32	-4.98	0.00105	0.02	1	1.27	-1.28	-2.43	0.02	0.08	1		PREDICTED: protein quaking-A-like [Salmo salar]
contig_0107365	1..2535	0.69	-2.32	-4.98	0.00105	0.02	1	0.69	-0.9	-1.87	0.07	0.19	1		PREDICTED: coiled-coil domain-containing protein 85B-like [Salmo salar]
contig_0159693	1..2689	0.91	-2.32	-4.98	0.000132	0.00316	1	0.91	-0.63	-1.55	0.13	0.28	1		PREDICTED: muscle-related coiled-coil protein-like [Salmo salar]
contig_0169482	1..3878	0.98	-2.32	-4.99	2.96e-06	0.000126	0.8	0.98	-0.28	-1.21	0.35	0.55	1		PREDICTED: formin-2-like [Salmo salar]
contig_0181621	1..3219	0.54	-2.32	-4.98	0.00105	0.02	1	0.54	-1.79	-3.45	0.00399	0.02	1		PREDICTED: nibrin-like [Salmo salar]
contig_0048431	1..1346	5.94	-2.33	-5.02	9.56e-12	1.2e-09	2.6e-06	5.94	-0.25	-1.19	0.26	0.44	1		creatine kinase-3 [Salmo salar]
contig_0071487	1..880	3.19	-2.33	-5.03	4.4e-05	0.00127	1	3.19	-1.2	-2.3	0.00592	0.03	1		not available
contig_0107196	1..2446	1.43	-2.33	-5.03	6.61e-06	0.000254	1	1.43	-1.08	-2.12	0.00534	0.03	1		PREDICTED: homeobox protein MOX-2 [Salmo salar]
contig_0111608	1..1483	4.21	-2.33	-5.01	1.1e-09	9.88e-08	0.000299	4.21	-1.8	-3.49	8.97e-08	2.6e-06	0.02		PREDICTED: clathrin heavy chain 1-like isoform X4 [Salmo salar]
contig_0133584	1..3077	1.81	-2.33	-5.01	7.54e-09	5.87e-07	0.00205	1.81	-0.79	-1.73	0.00504	0.03	1		PREDICTED: lysyl oxidase homolog 2A-like [Salmo salar]
contig_0159794	1..1351	2.08	-2.33	-5.03	4.4e-05	0.00127	1	2.08	-1.29	-2.44	0.0038	0.02	1		PREDICTED: EMILIN-1-like isoform X2 [Salmo salar]
contig_0072597	1..3027	0.47	-2.34	-5.07	0.00277	0.03	1	0.47	-1.31	-2.48	0.03	0.1	1		PREDICTED: low-density lipoprotein receptor-related protein 1B-like isoform X4 [Salmo salar]
contig_0081257	1..1339	1.58	-2.34	-5.05	0.000327	0.00649	1	1.58	-0.98	-1.97	0.04	0.12	1		PREDICTED: LIM/homeobox protein Lhx6-like isoform X1 [Salmo salar]
contig_0083261	1..348	4.11	-2.34	-5.07	0.00277	0.03	1	4.11	-7.46	-176.21	0.08	0.2	1		PREDICTED: intestinal-type alkaline phosphatase-like [Salmo salar]
contig_0125012	1..3559	1.96	-2.34	-5.05	1.34e-10	1.4e-08	3.65e-05	1.96	-0.73	-1.66	0.00401	0.02	1		PREDICTED: collagen alpha-1(VIII) chain-like [Salmo salar]
contig_0131353	1..508	2.81	-2.34	-5.07	0.00277	0.03	1	2.81	-0.15	-1.11	0.75	0.86	1		PREDICTED: motile sperm domain-containing protein 2 [Salmo salar]
contig_0174629	1..1545	0.93	-2.34	-5.07	0.00277	0.03	1	0.93	-1.97	-3.93	0.00585	0.03	1		PREDICTED: protein FAM57B-like [Salmo salar]
contig_0200975	1..2204	0.65	-2.34	-5.07	0.00277	0.03	1	0.65	-0.99	-1.99	0.08	0.2	1		PREDICTED: uncharacterized protein LOC106565525 [Salmo salar]
contig_0219638	1..1996	0.72	-2.34	-5.07	0.00277	0.03	1	0.72	-1.31	-2.48	0.03	0.1	1		PREDICTED: calmodulin-regulated spectrin-associated protein 2-like isoform X1 [Salmo salar]
contig_0111777	1..2802	1.27	-2.35	-5.1	5.32e-06	0.00021	1	1.27	-1.92	-3.79	4.06e-05	0.000554	1		PREDICTED: receptor-type tyrosine-protein phosphatase delta-like isoform X10 [Salmo salar]
contig_0114666	1..1204	2.07	-2.35	-5.09	0.000105	0.00262	1	2.07	-1.79	-3.45	0.000726	0.00613	1		PREDICTED: transmembrane protein 184B-like isoform X2 [Salmo salar]
contig_0139023	1..630	5.63	-2.35	-5.1	5.32e-06	0.00021	1	5.63	-1.31	-2.47	0.00127	0.00971	1		PREDICTED: ADAMTS-like protein 4 [Salmo salar]
contig_0052204	1..419	121.54	-2.36	-5.13	9.36e-43	1.09e-39	2.55e-37	121.54	-1.33	-2.52	6.89e-19	1.27e-16	1.83e-13		not available
contig_0116240	1..1950	0.92	-2.36	-5.13	0.000829	0.01	1	0.92	-1.32	-2.5	0.02	0.07	1		not available
contig_0157113	1..1611	1.12	-2.36	-5.13	0.000829	0.01	1	1.12	-1.83	-3.56	0.00313	0.02	1		PREDICTED: striatin-4-like isoform X1 [Salmo salar]
contig_0012566	1..3514	4.07	-2.37	-5.17	1.37e-18	3.62e-16	3.72e-13	4.07	-1.34	-2.53	6.62e-10	3.06e-08	0.000176		PREDICTED: elastin-like isoform X10 [Salmo salar]
contig_0093799	1..1128	8.87	-2.37	-5.17	3.79e-14	6.39e-12	1.03e-08	8.87	-1.77	-3.41	9.46e-11	5.17e-09	2.52e-05		PREDICTED: collagen alpha-1(IX) chain-like [Salmo salar]
contig_0111049	1..3071	7.76	-2.37	-5.15	7.84e-27	3.59e-24	2.13e-21	7.76	-1.77	-3.4	3.37e-19	6.47e-17	8.97e-14		PREDICTED: complement C1q tumor necrosis factor-related protein 6 [Salmo salar]
contig_0128499	1..301	7.21	-2.37	-5.17	0.000259	0.00541	1	7.21	-1.91	-3.76	0.00101	0.00802	1		not available
contig_0138536	1..337	6.44	-2.37	-5.17	0.000259	0.00541	1	6.44	-1.59	-3.01	0.00294	0.02	1		PREDICTED: forkhead box protein P1-B-like isoform X3 [Salmo salar]
contig_0139255	1..536	4.05	-2.37	-5.17	0.000259	0.00541	1	4.05	-1.22	-2.32	0.01	0.06	1		not available
contig_0113385	1..774	3.28	-2.38	-5.2	8.4e-05	0.00219	1	3.28	-0.98	-1.97	0.02	0.09	1		RCC2 homolog [Salmo salar]
contig_0168183	1..1732	2.29	-2.38	-5.2	1.56e-06	7.27e-05	0.42	2.29	-1.62	-3.07	9.62e-05	0.00115	1		PREDICTED: spondin-1-like isoform X5 [Salmo salar]
contig_0029840	1..1371	1.08	-2.39	-5.26	0.00217	0.03	1	1.08	-1.36	-2.57	0.02	0.09	1		PREDICTED: cAMP-specific 3',5'-cyclic phosphodiesterase 4D-like isoform X4 [Salmo salar]
contig_0062382	1..2285	12.65	-2.39	-5.24	7.69e-31	4.59e-28	2.09e-25	12.65	-1.88	-3.67	2.95e-23	9.15e-21	7.86e-18		PREDICTED: collagen alpha-1(XI) chain-like isoform X4 [Salmo salar]
contig_0074761	1..702	2.11	-2.39	-5.26	0.00217	0.03	1	2.11	0.02	1.01	0.97	0.99	1		PREDICTED: uncharacterized protein LOC106609062 isoform X1 [Salmo salar]
contig_0089660	1..722	2.05	-2.39	-5.26	0.00217	0.03	1	2.05	-1.36	-2.57	0.02	0.09	1		PREDICTED: versican core protein-like [Salmo salar]
contig_0131480	1..2831	1.29	-2.39	-5.25	3.46e-06	0.000144	0.94	1.29	-1.5	-2.83	0.000336	0.00328	1		PREDICTED: fibronectin type III domain-containing protein 1 [Salmo salar]
contig_0132314	1..1295	1.14	-2.39	-5.26	0.00217	0.03	1	1.14	-1.55	-2.93	0.01	0.06	1		not available
contig_0162555	1..602	2.46	-2.39	-5.26	0.00217	0.03	1	2.46	-1.36	-2.57	0.02	0.09	1		PREDICTED: endonuclease domain-containing 1 protein-like [Salmo salar]
contig_0193055	1..1414	1.05	-2.39	-5.26	0.00217	0.03	1	1.05	-1.55	-2.93	0.01	0.06	1		PREDICTED: brain-derived neurotrophic factor-like isoform X1 [Salmo salar]
contig_0195932	1..514	2.88	-2.39	-5.26	0.00217	0.03	1	2.88	-0.67	-1.59	0.19	0.36	1		PREDICTED: A-kinase anchor protein 1, mitochondrial-like [Salmo salar]
contig_0200888	1..1712	0.87	-2.39	-5.26	0.00217	0.03	1	0.87	-0.78	-1.72	0.14	0.29	1		PREDICTED: apoptosis-inducing factor 3-like [Salmo salar]
contig_0016392	1..301	6.16	-2.4	-5.28	0.000655	0.01	1	9.43	0.79	1.73	0.03	0.11	1		PREDICTED: protein FAM111A-like [Salmo salar]
contig_0024644	1..2068	4.07	-2.4	-5.29	1.77e-12	2.45e-10	4.81e-07	4.07	-1.26	-2.4	1.38e-06	2.97e-05	0.37		PREDICTED: procollagen-lysine,2-oxoglutarate 5-dioxygenase 2-like isoform X2 [Salmo salar]
contig_0050714	1..3983	2.21	-2.4	-5.29	6.56e-13	9.59e-11	1.78e-07	2.21	-0.99	-1.98	4.89e-05	0.00065	1		PREDICTED: EMILIN-2-like isoform X3 [Salmo salar]
contig_0127508	1..1352	1.37	-2.4	-5.28	0.000655	0.01	1	1.37	-1.23	-2.34	0.02	0.08	1		PREDICTED: voltage-dependent T-type calcium channel subunit alpha-1H-like, partial [Salmo salar]
contig_0149789	1..3637	0.51	-2.4	-5.28	0.000655	0.01	1	0.51	-1.1	-2.15	0.03	0.11	1		PREDICTED: hemicentin-1 [Salmo salar]
contig_0159872	1..1306	1.42	-2.4	-5.28	0.000655	0.01	1	1.42	-1.1	-2.15	0.03	0.11	1		PREDICTED: angiopoietin-related protein 1-like [Salmo salar]
contig_0169695	1..902	2.05	-2.4	-5.28	0.000655	0.01	1	2.05	0.11	1.08	0.78	0.88	1		PREDICTED: probable carboxypeptidase X1 isoform X2 [Salmo salar]
contig_0216858	1..225	8.23	-2.4	-5.28	0.000655	0.01	1	13.73	0.92	1.89	0.01	0.05	1		PREDICTED: enamelin-like isoform X2 [Salmo salar]
contig_0033751	1..2751	0.94	-2.41	-5.31	6.7e-05	0.00182	1	0.94	-0.23	-1.17	0.54	0.71	1		PREDICTED: colorectal mutant cancer protein-like isoform X4 [Salmo salar]
contig_0097089	1..1372	2.16	-2.41	-5.32	2.26e-05	0.00073	1	2.16	-1.05	-2.07	0.01	0.05	1		PREDICTED: uncharacterized protein LOC106605440 isoform X1 [Salmo salar]
contig_0098193	1..1939	1.15	-2.41	-5.3	0.000206	0.00451	1	1.15	-1.25	-2.38	0.01	0.05	1		PREDICTED: electrogenic sodium bicarbonate cotransporter 1-like isoform X4 [Salmo salar]
contig_0127618	1..673	5.51	-2.41	-5.33	2.79e-06	0.00012	0.76	5.51	-1.23	-2.35	0.00167	0.01	1		PREDICTED: axin-2-like [Salmo salar]
contig_0212590	1..718	3.1	-2.41	-5.3	0.000206	0.00451	1	3.1	-1.63	-3.09	0.00232	0.02	1		PREDICTED: hepatocyte growth factor-like, partial [Salmo salar]
contig_0000179	1..3993	179.4	-2.42	-5.36	1.2e-91	5.22e-88	3.25e-86	179.4	-1.84	-3.59	4.24e-55	6.22e-52	1.13e-49		Collagen alpha-1I chain precursor, partial [Salmo salar]
contig_0022200	1..739	14.04	-2.42	-5.36	9.12e-15	1.65e-12	2.48e-09	14.04	-0.31	-1.24	0.13	0.28	1		actin alpha 1-1 [Salmo salar]
contig_0065039	1..2548	5.21	-2.42	-5.34	7.64e-18	1.93e-15	2.08e-12	5.21	-1.08	-2.11	3.62e-07	9.08e-06	0.1		PREDICTED: endosialin-like [Salmo salar]
contig_0084283	1..5257	5.35	-2.42	-5.36	1.13e-30	6.63e-28	3.09e-25	5.35	-1.4	-2.64	1.64e-15	1.97e-13	4.36e-10		PREDICTED: thrombospondin-2 isoform X1 [Salmo salar]
contig_0029076	1..2504	12.47	-2.43	-5.39	5.67e-33	3.95e-30	1.54e-27	12.47	-1.83	-3.55	1.55e-23	5.02e-21	4.13e-18		PREDICTED: lysyl oxidase homolog 4-like [Salmo salar]
contig_0043793	1..1348	11.9	-2.43	-5.4	1.15e-20	3.57e-18	3.13e-15	11.9	-1.93	-3.8	2.3e-16	3.11e-14	6.14e-11		not available
contig_0042618	1..754	2.53	-2.44	-5.43	0.000518	0.00934	1	2.53	-7.87	-234.65	0.07	0.18	1		PREDICTED: plectin-like isoform X8 [Salmo salar]
contig_0062651	1..1136	1.35	-2.44	-5.45	0.00171	0.02	1	1.35	-1.41	-2.66	0.02	0.07	1		PREDICTED: tumor necrosis factor receptor superfamily member 10A-like isoform X2 [Salmo salar]
contig_0080823	1..666	2.86	-2.44	-5.43	0.000518	0.00934	1	2.86	-0.92	-1.9	0.06	0.16	1		RCC2 homolog [Salmo salar]
contig_0089594	1..660	2.33	-2.44	-5.45	0.00171	0.02	1	2.33	0.03	1.02	0.94	0.96	1		PREDICTED: MARVEL domain-containing protein 3-like isoform X1 [Salmo salar]
contig_0099692	1..226	6.79	-2.44	-5.45	0.00171	0.02	1	6.79	-7.56	-189.2	0.08	0.2	1		PREDICTED: interferon-induced very large GTPase 1-like [Salmo salar]
contig_0103907	1..1087	2.09	-2.44	-5.42	0.000164	0.00374	1	2.09	-1.81	-3.51	0.00108	0.00849	1		PREDICTED: galectin-2-like [Salmo salar]
contig_0186781	1..3300	0.58	-2.44	-5.43	0.000518	0.00934	1	0.58	-0.34	-1.27	0.43	0.6	1		PREDICTED: probable G-protein coupled receptor 153 isoform X3 [Salmo salar]
contig_0203074	1..1076	1.77	-2.44	-5.43	0.000518	0.00934	1	1.77	-1.72	-3.3	0.00332	0.02	1		PREDICTED: sodium- and chloride-dependent GABA transporter 3-like [Salmo salar]
contig_0203829	1..269	9.84	-2.44	-5.42	5.36e-05	0.0015	1	9.84	-0.08	-1.06	0.82	0.9	1		not available
contig_0023663	1..3695	19.96	-2.46	-5.51	3.09e-54	5.57e-51	8.4e-49	19.96	-1.02	-2.02	8.73e-14	7.88e-12	2.32e-08		PREDICTED: myosin heavy chain, fast skeletal muscle-like isoform X1 [Salmo salar]
contig_0026168	1..1782	8.97	-2.46	-5.51	8.54e-21	2.66e-18	2.32e-15	8.97	-2	-3.99	6.19e-17	8.99e-15	1.65e-11		PREDICTED: collagen alpha-2(I) chain isoform X3 [Salmo salar]
contig_0060784	1..3023	2.03	-2.47	-5.54	6.79e-10	6.28e-08	0.000185	2.03	-0.23	-1.18	0.34	0.52	1		PREDICTED: perforin-1-like isoform X1 [Salmo salar]
contig_0102970	1..824	2.83	-2.47	-5.55	0.000131	0.00312	1	2.83	-1.32	-2.49	0.00663	0.04	1		PREDICTED: testin-like [Salmo salar]
contig_0015379	1..1207	40.83	-2.48	-5.58	2.01e-44	2.56e-41	5.47e-39	40.83	-0.61	-1.53	1.37e-05	0.000219	1		PREDICTED: myosin heavy chain, fast skeletal muscle-like isoform X2 [Salmo salar]
contig_0132297	1..1195	1.64	-2.48	-5.58	0.000411	0.00782	1	1.64	-1.07	-2.1	0.03	0.11	1		PREDICTED: LIM/homeobox protein Lhx6-like isoform X2 [Salmo salar]
contig_0218691	1..5430	0.36	-2.48	-5.58	0.000411	0.00782	1	0.36	-1.31	-2.48	0.01	0.06	1		PREDICTED: multiple epidermal growth factor-like domains protein 6 isoform X1 [Salmo salar]
contig_0034001	1..703	2.26	-2.49	-5.63	0.00135	0.02	1	2.26	-1.65	-3.14	0.00836	0.04	1		PREDICTED: uncharacterized protein LOC106574635 [Salmo salar]
contig_0037646	1..6349	1.53	-2.49	-5.63	2.59e-14	4.42e-12	7.05e-09	1.53	-1.07	-2.1	6.86e-06	0.000121	1		PREDICTED: versican core protein-like isoform X1 [Salmo salar]
contig_0081485	1..768	36.39	-2.49	-5.63	2.47e-31	1.52e-28	6.73e-26	36.39	0.13	1.09	0.39	0.58	1		PREDICTED: myosin heavy chain, fast skeletal muscle-like, partial [Salmo salar]
contig_0086080	1..2522	1.55	-2.49	-5.63	1.2e-06	5.77e-05	0.33	1.55	-1.6	-3.03	0.000118	0.00138	1		PREDICTED: semaphorin-3D-like [Salmo salar]
contig_0113157	1..844	3.7	-2.49	-5.6	1.17e-05	0.000416	1	3.7	-0.4	-1.32	0.26	0.44	1		PREDICTED: tight junction protein ZO-1-like [Salmo salar]
contig_0146349	1..969	2.84	-2.49	-5.63	3.44e-05	0.00104	1	2.84	-1.56	-2.95	0.00111	0.0087	1		PREDICTED: endonuclease domain-containing 1 protein-like [Salmo salar]
contig_0147234	1..1305	1.22	-2.49	-5.63	0.00135	0.02	1	1.22	-0.77	-1.7	0.13	0.28	1		not available
contig_0152246	1..1866	0.85	-2.49	-5.63	0.00135	0.02	1	0.85	-1.65	-3.14	0.00836	0.04	1		PREDICTED: uncharacterized protein LOC106607481 isoform X1 [Salmo salar]
contig_0154381	1..3053	1.02	-2.49	-5.6	1.17e-05	0.000416	1	1.02	-1.27	-2.42	0.00267	0.02	1		PREDICTED: A-kinase anchor protein 2-like [Salmo salar]
contig_0202431	1..1356	1.17	-2.49	-5.63	0.00135	0.02	1	1.17	0.17	1.12	0.69	0.82	1		PREDICTED: primary amine oxidase, liver isozyme [Salmo salar]
contig_0218605	1..1792	0.89	-2.49	-5.63	0.00135	0.02	1	1.2	0.61	1.53	0.13	0.28	1		PREDICTED: histone-lysine N-methyltransferase Smyd1-like [Salmo salar]
contig_0020034	1..1977	2.38	-2.5	-5.65	1.38e-07	8.46e-06	0.04	2.38	-0.76	-1.69	0.01	0.05	1		PREDICTED: chordin-like [Salmo salar]
contig_0116156	1..1660	2.14	-2.5	-5.66	3.32e-06	0.00014	0.9	2.14	-1.31	-2.47	0.00127	0.00971	1		PREDICTED: ectonucleoside triphosphate diphosphohydrolase 3-like [Salmo salar]
contig_0155501	1..792	4.48	-2.5	-5.66	3.32e-06	0.00014	0.9	4.48	-1.72	-3.29	0.000115	0.00135	1		PREDICTED: ras association domain-containing protein 3-like isoform X1 [Salmo salar]
contig_0049966	1..772	1.58	-2.51	-5.71	0.00464	0.05	1	1.58	-1.27	-2.41	0.05	0.14	1		PREDICTED: U3 small nucleolar ribonucleoprotein protein IMP4-like isoform X1 [Salmo salar]
contig_0050969	1..1369	0.89	-2.51	-5.71	0.00464	0.05	1	0.89	-0.76	-1.69	0.18	0.35	1		PREDICTED: adenylate cyclase type 5-like isoform X2 [Salmo salar]
contig_0067256	1..641	1.9	-2.51	-5.71	0.00464	0.05	1	1.9	-0.76	-1.69	0.18	0.35	1		PREDICTED: protein unc-119 homolog B-like [Salmo salar]
contig_0117160	1..1630	0.75	-2.51	-5.71	0.00464	0.05	1	0.75	-1.74	-3.35	0.02	0.07	1		PREDICTED: A disintegrin and metalloproteinase with thrombospondin motifs 7-like [Salmo salar]
contig_0130282	1..3110	0.39	-2.51	-5.71	0.00464	0.05	1	0.39	-1.74	-3.35	0.02	0.07	1		PREDICTED: cadherin-7-like isoform X1 [Salmo salar]
contig_0155807	1..374	3.26	-2.51	-5.71	0.00464	0.05	1	3.26	-0.39	-1.31	0.46	0.64	1		not available
contig_0186357	1..671	1.81	-2.51	-5.71	0.00464	0.05	1	1.81	-1.74	-3.35	0.02	0.07	1		PREDICTED: CCR4-NOT transcription complex subunit 4-like, partial [Salmo salar]
contig_0190401	1..2649	0.46	-2.51	-5.71	0.00464	0.05	1	0.46	-1.74	-3.35	0.02	0.07	1		PREDICTED: progestin and adipoQ receptor family member 4-like isoform X1 [Salmo salar]
contig_0198916	1..551	2.21	-2.51	-5.71	0.00464	0.05	1	2.21	-1.27	-2.41	0.05	0.14	1		PREDICTED: uncharacterized protein LOC106600540 [Salmo salar]
contig_0290692	1..298	4.09	-2.51	-5.71	0.00464	0.05	1	4.09	-0.09	-1.06	0.86	0.92	1		PREDICTED: protein NLRC3-like [Salmo salar]
contig_0076049	1..2042	1.76	-2.52	-5.75	2.69e-06	0.000116	0.73	1.76	-0.84	-1.8	0.02	0.08	1		PREDICTED: collagen alpha-1(IX) chain-like [Salmo salar]
contig_0082819	1..1620	2.22	-2.52	-5.75	2.69e-06	0.000116	0.73	2.22	-0.61	-1.52	0.08	0.21	1		Aquaporin-1 [Salmo salar]
contig_0094623	1..1868	3.83	-2.52	-5.73	2.86e-11	3.3e-09	7.77e-06	3.83	-0.51	-1.43	0.03	0.11	1		PREDICTED: acetylcholine receptor subunit gamma-like isoform X3 [Salmo salar]
contig_0128184	1..1319	1.53	-2.52	-5.73	0.000327	0.0065	1	1.53	-1.22	-2.33	0.02	0.07	1		PREDICTED: thrombospondin-3a-like [Salmo salar]
contig_0015125	1..310	315.4	-2.53	-5.79	1.21e-63	2.79e-60	3.29e-58	315.4	-1.54	-2.91	1.11e-29	6.04e-27	2.96e-24		Collagen alpha-1I chain precursor, partial [Salmo salar]
contig_0021582	1..3983	7	-2.53	-5.78	1.07e-31	6.64e-29	2.92e-26	7	-1.61	-3.05	1.09e-18	1.98e-16	2.91e-13		PREDICTED: collagen alpha-1(XII) chain-like isoform X1 [Salmo salar]
contig_0070893	1..1312	8.51	-2.53	-5.77	4.56e-16	9.37e-14	1.24e-10	8.51	-1.38	-2.6	8.7e-09	3.19e-07	0.00231		PREDICTED: collagen alpha-2(IX) chain-like [Salmo salar]
contig_0202981	1..1159	2.79	-2.53	-5.79	7.63e-06	0.000288	1	2.79	-1.68	-3.21	0.000253	0.00259	1		PREDICTED: adenylate cyclase type 2-like isoform X5 [Salmo salar]
contig_0002660	1..3313	46.39	-2.54	-5.81	3.96e-75	1.17e-71	1.08e-69	46.39	-1.57	-2.96	4.91e-34	3.57e-31	1.31e-28		PREDICTED: periostin-like isoform X2 [Salmo salar]
contig_0052105	1..1219	2	-2.54	-5.8	8.36e-05	0.00218	1	2	-1.5	-2.82	0.00259	0.02	1		PREDICTED: uncharacterized protein LOC106583985 [Salmo salar]
contig_0090970	1..1186	2.05	-2.54	-5.8	8.36e-05	0.00218	1	2.05	-0.77	-1.7	0.07	0.19	1		PREDICTED: fibronectin type III domain-containing protein 1 [Salmo salar]
contig_0202701	1..1781	0.92	-2.54	-5.82	0.00107	0.02	1	0.92	-1.92	-3.77	0.00376	0.02	1		PREDICTED: DBH-like monooxygenase protein 2 homolog isoform X1 [Salmo salar]
contig_0010194	1..2372	2.9	-2.55	-5.84	5.33e-11	5.95e-09	1.45e-05	2.9	-0.15	-1.11	0.52	0.69	1		interleukin-17A/F3 [Salmo salar]
contig_0138851	1..1483	1.93	-2.55	-5.85	2.23e-05	0.000723	1	1.93	-1.07	-2.1	0.01	0.05	1		PREDICTED: coiled-coil domain-containing protein 136-like isoform X3 [Salmo salar]
contig_0052903	1..2152	2.29	-2.56	-5.91	6.18e-08	4.04e-06	0.02	2.29	-1.24	-2.37	0.00014	0.00159	1		PREDICTED: collagen alpha-1(XXVI) chain-like [Salmo salar]
contig_0085068	1..956	2.16	-2.56	-5.88	0.000261	0.00544	1	2.16	-1.67	-3.18	0.00277	0.02	1		PREDICTED: carboxypeptidase Z-like [Salmo salar]
contig_0106918	1..2717	4.21	-2.56	-5.91	1.71e-16	3.7e-14	4.65e-11	4.21	-0.96	-1.95	1.09e-05	0.00018	1		PREDICTED: hematopoietic progenitor cell antigen CD34-like isoform X1 [Salmo salar]
contig_0111821	1..781	4.2	-2.56	-5.89	6.17e-06	0.000239	1	4.93	0.41	1.33	0.15	0.31	1		phosphoglycerate mutase 2-1 (muscle) [Salmo salar]
contig_0016226	1..2642	261.34	-2.57	-5.92	2.15e-101	1.19e-97	5.84e-96	261.34	-1.83	-3.55	3.82e-54	5.25e-51	1.02e-48		PREDICTED: collagen alpha-2(I) chain isoform X1 [Salmo salar]
contig_0063678	1..1416	7.81	-2.57	-5.93	4.34e-16	8.96e-14	1.18e-10	7.81	-1.85	-3.59	4.69e-12	3.27e-10	1.25e-06		not available
contig_0075016	1..435	9.49	-2.57	-5.94	5.26e-07	2.81e-05	0.14	9.49	-1.26	-2.4	0.000829	0.00683	1		Whey acidic protein precursor [Salmo salar]
contig_0162882	1..6627	1.12	-2.57	-5.94	1.01e-11	1.26e-09	2.74e-06	1.12	-1.45	-2.72	4.79e-07	1.16e-05	0.13		PREDICTED: latent-transforming growth factor beta-binding protein 2-like isoform X1 [Salmo salar]
contig_0033468	1..3504	14.16	-2.58	-5.99	1.7e-46	2.39e-43	4.62e-41	14.16	-1.03	-2.04	1.84e-12	1.38e-10	4.89e-07		PREDICTED: microtubule-associated protein tau-like isoform X2 [Salmo salar]
contig_0079711	1..220	17.08	-2.58	-6	1.44e-06	6.78e-05	0.39	17.08	-0.63	-1.54	0.07	0.19	1		not available
contig_0093203	1..497	2.56	-2.58	-5.96	0.00365	0.04	1	2.56	-7.29	-156.73	0.09	0.22	1		PREDICTED: uncharacterized protein LOC106561442 [Salmo salar]
contig_0107981	1..1604	0.79	-2.58	-5.96	0.00365	0.04	1	0.79	-0.34	-1.27	0.51	0.68	1		Transmembrane protein 86A [Salmo salar]
contig_0150758	1..486	2.61	-2.58	-5.96	0.00365	0.04	1	2.61	-1.55	-2.92	0.02	0.08	1		PREDICTED: olfactomedin-like protein 2A [Salmo salar]
contig_0156768	1..1606	0.79	-2.58	-5.96	0.00365	0.04	1	0.79	-1.55	-2.92	0.02	0.08	1		PREDICTED: protocadherin Fat 3-like, partial [Salmo salar]
contig_0166992	1..2264	0.56	-2.58	-5.96	0.00365	0.04	1	0.56	0.02	1.01	0.97	0.99	1		PREDICTED: glutaminyl-peptide cyclotransferase-like isoform X1 [Salmo salar]
contig_0201564	1..927	1.37	-2.58	-5.96	0.00365	0.04	1	1.37	-1.81	-3.5	0.01	0.06	1		FGF2 [Salmo salar]
contig_0034581	1..1321	9.46	-2.59	-6.02	8.61e-18	2.15e-15	2.34e-12	9.46	-0.63	-1.55	0.00171	0.01	1		creatine kinase-1 [Salmo salar]
contig_0143128	1..558	3.79	-2.59	-6.03	0.000209	0.00456	1	3.79	-0.98	-1.97	0.04	0.12	1		PREDICTED: anoctamin-5-like isoform X2 [Salmo salar]
contig_0147529	1..403	4.2	-2.59	-6.01	0.000849	0.01	1	4.2	-7.71	-208.68	0.07	0.19	1		not available
contig_0166551	1..305	6.94	-2.59	-6.03	0.000209	0.00456	1	6.94	-1.71	-3.26	0.00219	0.01	1		PREDICTED: collagen alpha-1(XXIII) chain-like isoform X7 [Salmo salar]
contig_0040354	1..2659	19.33	-2.6	-6.06	9.42e-48	1.42e-44	2.56e-42	19.33	-1.22	-2.34	1.38e-16	1.92e-14	3.67e-11		Protein-lysine 6-oxidase precursor [Salmo salar]
contig_0069234	1..1709	64	-2.6	-6.06	7.78e-69	2.15e-65	2.12e-63	64	-1.29	-2.45	8.65e-23	2.51e-20	2.3e-17		PREDICTED: lumican isoform X1 [Salmo salar]
contig_0005656	1..1737	18.5	-2.62	-6.13	7.53e-36	6.31e-33	2.05e-30	18.5	-0.4	-1.32	0.00785	0.04	1		PREDICTED: troponin T, fast skeletal muscle isoforms-like, partial [Salmo salar]
contig_0009029	1..200	6.62	-2.63	-6.21	0.00289	0.03	1	6.62	-0.62	-1.54	0.24	0.43	1		Sperm acrosome membrane-associated protein 4 precursor [Salmo salar]
contig_0014900	1..4060	3.89	-2.63	-6.17	1.74e-21	5.66e-19	4.73e-16	3.89	-1.33	-2.51	2.17e-10	1.1e-08	5.77e-05		PREDICTED: collagen alpha-1(XVI) chain-like isoform X1 [Salmo salar]
contig_0019814	1..948	1.84	-2.63	-6.19	0.000677	0.01	1	1.84	-1.14	-2.21	0.03	0.11	1		PREDICTED: A disintegrin and metalloproteinase with thrombospondin motifs 10-like isoform X3 [Salmo salar]
contig_0071494	1..305	5.73	-2.63	-6.19	0.000677	0.01	1	5.73	-1.79	-3.45	0.00399	0.02	1		PREDICTED: fascin-like [Salmo salar]
contig_0087723	1..1221	2.12	-2.63	-6.18	4.34e-05	0.00126	1	2.12	-1.47	-2.78	0.00218	0.01	1		PREDICTED: spondin-1-like [Salmo salar]
contig_0098206	1..882	1.5	-2.63	-6.21	0.00289	0.03	1	1.5	-0.62	-1.54	0.24	0.43	1		PREDICTED: prostaglandin E synthase-like [Salmo salar]
contig_0105100	1..233	5.68	-2.63	-6.21	0.00289	0.03	1	5.68	0.04	1.03	0.94	0.96	1		PREDICTED: myosin-7-like, partial [Salmo salar]
contig_0123585	1..2272	0.58	-2.63	-6.21	0.00289	0.03	1	0.58	-1.86	-3.64	0.0097	0.05	1		PREDICTED: protocadherin-16-like [Salmo salar]
contig_0198551	1..1372	2.51	-2.63	-6.17	3.29e-06	0.000139	0.89	2.51	-1.88	-3.68	6.27e-05	0.000804	1		PREDICTED: endo-1,4-beta-xylanase B-like, partial [Salmo salar]
contig_0034644	1..4329	5.38	-2.64	-6.25	7.09e-29	3.75e-26	1.93e-23	5.38	-1.49	-2.81	3.05e-15	3.53e-13	8.13e-10		PREDICTED: collagen alpha-3(VI) chain-like isoform X1 [Salmo salar]
contig_0041319	1..950	3.68	-2.65	-6.26	2.67e-06	0.000116	0.73	3.68	-8.75	-429.46	0.04	0.13	1		not available
contig_0006460	1..247	9	-2.66	-6.33	0.000135	0.0032	1	9	-0.15	-1.11	0.7	0.82	1		PREDICTED: kinesin-like protein KIF26A isoform X5 [Salmo salar]
contig_0044048	1..398	5.59	-2.66	-6.33	0.000135	0.0032	1	5.59	-0.63	-1.55	0.14	0.29	1		PREDICTED: solute carrier family 46 member 3-like isoform X1 [Salmo salar]
contig_0054629	1..619	6.41	-2.66	-6.34	6.36e-07	3.32e-05	0.17	6.41	-0.27	-1.21	0.35	0.55	1		PREDICTED: tropomyosin alpha-1 chain-like isoform X1 [Salmo salar]
contig_0099566	1..1255	1.77	-2.66	-6.33	0.000135	0.0032	1	1.77	-8.1	-273.61	0.06	0.17	1		PREDICTED: galectin-3-like isoform X2 [Salmo salar]
contig_0099671	1..1903	1.39	-2.66	-6.3	3.5e-05	0.00105	1	1.39	-1.62	-3.07	0.00105	0.00828	1		Lipoma HMGIC fusion partner-like 4 protein [Salmo salar]
contig_0104472	1..5304	2.15	-2.66	-6.33	8.85e-17	1.98e-14	2.41e-11	2.15	-1.7	-3.25	2.77e-11	1.69e-09	7.37e-06		PREDICTED: tenascin isoform X1 [Salmo salar]
contig_0154555	1..466	4.77	-2.66	-6.33	0.000135	0.0032	1	4.77	-1.25	-2.38	0.01	0.05	1		PREDICTED: collagen alpha-3(VI) chain-like isoform X3 [Salmo salar]
contig_0075611	1..1240	2.86	-2.67	-6.36	2.18e-06	9.74e-05	0.59	2.86	-1.92	-3.79	4.06e-05	0.000554	1		PREDICTED: gap junction gamma-2 protein [Salmo salar]
contig_0025525	1..660	47.56	-2.68	-6.41	5.54e-36	4.74e-33	1.51e-30	47.56	-0.83	-1.78	1.45e-07	3.99e-06	0.04		not available
contig_0125295	1..3449	0.78	-2.68	-6.43	2.83e-05	0.000882	1	0.78	-1.42	-2.68	0.00228	0.02	1		PREDICTED: platelet-derived growth factor C isoform X1 [Salmo salar]
contig_0039233	1..1152	1.19	-2.69	-6.45	0.0023	0.03	1	1.19	-1.66	-3.17	0.01	0.06	1		PREDICTED: CXADR-like membrane protein [Salmo salar]
contig_0035505	1..3597	5.12	-2.7	-6.51	1.32e-24	5.32e-22	3.59e-19	5.12	-1.9	-3.73	9.99e-18	1.61e-15	2.66e-12		PREDICTED: uncharacterized protein LOC106599377, partial [Salmo salar]
contig_0100450	1..1920	1.19	-2.7	-6.48	0.000108	0.00268	1	1.19	-1.18	-2.26	0.01	0.06	1		PREDICTED: myelin proteolipid protein isoform X2 [Salmo salar]
contig_0108570	1..4169	2.26	-2.7	-6.48	1.59e-14	2.78e-12	4.34e-09	2.26	-1.72	-3.29	5.34e-10	2.53e-08	0.000142		PREDICTED: collagen alpha-1(VII) chain-like [Salmo salar]
contig_0154469	1..508	18.76	-2.71	-6.56	1.08e-14	1.92e-12	2.93e-09	18.76	-0.47	-1.39	0.03	0.1	1		not available
contig_0137440	1..3670	0.5	-2.72	-6.57	0.000434	0.00813	1	0.5	-1.51	-2.86	0.00721	0.04	1		PREDICTED: HHIP-like protein 1 isoform X1 [Salmo salar]
contig_0186241	1..1799	1.03	-2.72	-6.57	0.000434	0.00813	1	1.03	-0.11	-1.08	0.79	0.88	1		PREDICTED: dehydrogenase/reductase SDR family member 7C [Salmo salar]
contig_0102458	1..716	3.25	-2.73	-6.63	8.75e-05	0.00227	1	3.25	-0.77	-1.71	0.07	0.19	1		PREDICTED: acetylcholine receptor subunit gamma-like isoform X3 [Salmo salar]
contig_0027444	1..3302	1.41	-2.74	-6.7	7.16e-08	4.6e-06	0.02	1.47	0.24	1.18	0.34	0.53	1		Ecto-ADP-ribosyltransferase 5 precursor [Salmo salar]
contig_0076622	1..691	70.79	-2.74	-6.69	8.25e-49	1.27e-45	2.24e-43	70.79	-0.78	-1.72	4.63e-08	1.43e-06	0.01		myosin regulatory light chain 2 [Salmo salar]
contig_0117592	1..998	1.43	-2.74	-6.7	0.00183	0.02	1	1.43	-1.72	-3.29	0.01	0.05	1		not available
contig_0129604	1..870	1.64	-2.74	-6.7	0.00183	0.02	1	1.64	-0.86	-1.81	0.11	0.26	1		PREDICTED: LOW QUALITY PROTEIN: intraflagellar transport protein 81 homolog [Salmo salar]
contig_0151931	1..820	1.74	-2.74	-6.7	0.00183	0.02	1	1.74	-0.86	-1.81	0.11	0.26	1		PREDICTED: collagen alpha-1(II) chain isoform X2 [Salmo salar]
contig_0161365	1..470	3.04	-2.74	-6.7	0.00183	0.02	1	3.04	-1.14	-2.21	0.05	0.15	1		PREDICTED: lysine-specific demethylase 2B-like isoform X5 [Salmo salar]
contig_0215884	1..1835	0.78	-2.74	-6.7	0.00183	0.02	1	0.78	-1.31	-2.48	0.03	0.1	1		PREDICTED: tyrosine-protein kinase transmembrane receptor ROR1-like isoform X1 [Salmo salar]
contig_0042040	1..2228	1.07	-2.76	-6.78	7.08e-05	0.0019	1	1.07	-1.05	-2.08	0.02	0.08	1		PREDICTED: slit homolog 1 protein isoform X4 [Salmo salar]
contig_0098094	1..1847	1.03	-2.76	-6.75	0.000349	0.00685	1	1.03	-1.14	-2.21	0.02	0.09	1		PREDICTED: formin-like protein 2 isoform X4 [Salmo salar]
contig_0164354	1..1453	1.31	-2.76	-6.75	0.000349	0.00685	1	1.31	-0.41	-1.33	0.35	0.54	1		elongation factor 1 alpha [Salmo salar]
contig_0013903	1..1266	4.14	-2.78	-6.85	1.27e-08	9.49e-07	0.00346	4.14	-1.29	-2.44	6.18e-05	0.000795	1		PREDICTED: IgGFc-binding protein-like, partial [Salmo salar]
contig_0026262	1..5958	0.88	-2.78	-6.85	1.27e-08	9.49e-07	0.00346	0.88	-1.34	-2.52	3.95e-05	0.000542	1		PREDICTED: synaptopodin-2-like isoform X1 [Salmo salar]
contig_0056095	1..1265	5.65	-2.78	-6.87	9.04e-12	1.14e-09	2.46e-06	5.65	-1.15	-2.22	2.53e-05	0.00037	1		PREDICTED: calmodulin-regulated spectrin-associated protein 2 isoform X7 [Salmo salar]
contig_0059198	1..1616	2.39	-2.79	-6.93	6.51e-07	3.38e-05	0.18	2.39	-0.36	-1.29	0.23	0.41	1		PREDICTED: glutamine--fructose-6-phosphate aminotransferase [isomerizing] 2-like [Salmo salar]
contig_0090186	1..1212	1.62	-2.79	-6.94	0.000281	0.00578	1	4.16	1.54	2.91	5.68e-07	1.35e-05	0.15		PREDICTED: NACHT, LRR and PYD domains-containing protein 1-like [Salmo salar]
contig_0010077	1..5093	143.18	-2.8	-6.94	5e-119	5.93e-115	1.36e-113	143.18	-1.71	-3.26	9.42e-48	1.14e-44	2.51e-42		PREDICTED: collagen alpha-1(I) chain-like [Salmo salar]
contig_0017536	1..2609	325.76	-2.8	-6.96	4.63e-121	6.41e-117	1.26e-115	325.76	-1.98	-3.95	8.04e-64	1.54e-60	2.14e-58		PREDICTED: collagen alpha-2(I) chain isoform X4 [Salmo salar]
contig_0101295	1..270	5.49	-2.8	-6.95	0.00147	0.02	1	5.49	-1.04	-2.06	0.06	0.17	1		PREDICTED: fibronectin [Salmo salar]
contig_0123276	1..220	6.74	-2.8	-6.95	0.00147	0.02	1	6.74	-0.67	-1.59	0.19	0.36	1		not available
contig_0155678	1..513	2.89	-2.8	-6.95	0.00147	0.02	1	2.89	-1.36	-2.57	0.02	0.09	1		PREDICTED: titin-like isoform X3 [Salmo salar]
contig_0164457	1..4591	0.32	-2.8	-6.95	0.00147	0.02	1	0.32	0.02	1.01	0.97	0.99	1		PREDICTED: coiled-coil domain-containing protein 141-like isoform X1 [Salmo salar]
contig_0025526	1..394	22.17	-2.81	-7	6.82e-14	1.12e-11	1.86e-08	22.17	-1.07	-2.11	1.47e-05	0.000232	1		not available
contig_0131231	1..811	3.07	-2.82	-7.09	4.66e-05	0.00134	1	3.07	-1.79	-3.45	0.000726	0.00613	1		PREDICTED: LIM/homeobox protein Lhx6-like isoform X4 [Salmo salar]
contig_0037189	1..1539	4.82	-2.83	-7.12	3.38e-12	4.48e-10	9.18e-07	4.82	-1.65	-3.14	4.41e-08	1.37e-06	0.01		PREDICTED: lipoprotein lipase-like [Salmo salar]
contig_0060239	1..2490	3.76	-2.83	-7.12	9.48e-15	1.71e-12	2.58e-09	3.76	-0.14	-1.1	0.5	0.67	1		PREDICTED: glycogen phosphorylase, muscle form-like [Salmo salar]
contig_0082591	1..1481	1.36	-2.83	-7.13	0.000228	0.00488	1	1.36	-0.81	-1.75	0.08	0.2	1		PREDICTED: ATP-dependent 6-phosphofructokinase, muscle type-like [Salmo salar]
contig_0090462	1..2970	0.68	-2.83	-7.13	0.000228	0.00488	1	0.68	-0.42	-1.34	0.33	0.51	1		PREDICTED: neuropilin and tolloid-like protein 2 isoform X1 [Salmo salar]
contig_0047372	1..3840	2.88	-2.86	-7.27	6.2e-17	1.39e-14	1.69e-11	2.88	-1.88	-3.68	2.84e-12	2.07e-10	7.55e-07		PREDICTED: cartilage intermediate layer protein 2 [Salmo salar]
contig_0114780	1..3225	1.41	-2.86	-7.26	7.37e-08	4.72e-06	0.02	1.41	-1.29	-2.44	0.000424	0.00398	1		PREDICTED: collagen alpha-1(VII) chain-like isoform X5 [Salmo salar]
contig_0042275	1..3077	3.46	-2.87	-7.32	1.98e-16	4.22e-14	5.38e-11	3.46	-1.79	-3.46	2.3e-11	1.42e-09	6.13e-06		PREDICTED: collagen alpha-2(IX) chain-like [Salmo salar]
contig_0024497	1..1413	1.84	-2.88	-7.39	3.1e-05	0.000952	1	1.84	-1.47	-2.78	0.00218	0.01	1		PREDICTED: protein HEG-like isoform X3 [Salmo salar]
contig_0046773	1..1344	8.35	-2.88	-7.37	3.56e-17	8.25e-15	9.68e-12	8.35	-10.43	-1377.53	0.01	0.06	1		not available
contig_0191665	1..3271	1.72	-2.88	-7.34	3.45e-09	2.83e-07	0.000937	1.72	-1.77	-3.4	4.57e-07	1.12e-05	0.12		PREDICTED: inactive carboxypeptidase-like protein X2 [Salmo salar]
contig_0126618	1..1462	4.24	-2.89	-7.43	1.3e-10	1.36e-08	3.52e-05	4.24	-0.91	-1.88	0.00093	0.00751	1		solute carrier family 25-2 [Salmo salar]
contig_0145062	1..4347	0.72	-2.89	-7.43	5.52e-06	0.000218	1	0.72	-1.05	-2.08	0.00923	0.05	1		PREDICTED: contactin-1a-like [Salmo salar]
contig_0153336	1..1290	3.2	-2.89	-7.4	2.46e-07	1.42e-05	0.07	3.2	-1.15	-2.22	0.00186	0.01	1		PREDICTED: serine protease 23-like [Salmo salar]
contig_0105107	1..978	1.62	-2.9	-7.44	0.000952	0.01	1	1.62	-1.87	-3.65	0.00482	0.03	1		PREDICTED: uncharacterized protein LOC106564205 [Salmo salar]
contig_0118204	1..1633	0.97	-2.9	-7.44	0.000952	0.01	1	0.97	-1.01	-2.01	0.06	0.17	1		PREDICTED: ras-specific guanine nucleotide-releasing factor 2-like, partial [Salmo salar]
contig_0203378	1..1383	1.15	-2.9	-7.44	0.000952	0.01	1	1.15	-7.61	-195.69	0.08	0.2	1		not available
contig_0230324	1..1879	0.85	-2.9	-7.44	0.000952	0.01	1	0.85	-0.56	-1.48	0.25	0.43	1		PREDICTED: coiled-coil domain-containing protein 122-like [Salmo salar]
contig_0231666	1..707	2.25	-2.9	-7.44	0.000952	0.01	1	2.25	-0.08	-1.06	0.86	0.92	1		PREDICTED: extensin-1-like isoform X1 [Salmo salar]
contig_0068603	1..1893	2.24	-2.92	-7.59	1.69e-07	1.01e-05	0.05	2.24	-1.88	-3.68	1.22e-05	0.000199	1		PREDICTED: fibrillin-2-like [Salmo salar]
contig_0212649	1..469	14.67	-2.93	-7.63	1.34e-11	1.63e-09	3.66e-06	14.67	-1.94	-3.84	6.54e-09	2.48e-07	0.00174		PREDICTED: lysophosphatidic acid receptor 6-like [Salmo salar]
contig_0071467	1..572	3.79	-2.94	-7.69	0.000122	0.00295	1	3.79	-1.74	-3.34	0.00173	0.01	1		PREDICTED: CMRF35-like molecule 5, partial [Salmo salar]
contig_0171796	1..1723	1.57	-2.94	-7.69	2.08e-05	0.000682	1	1.57	-1.06	-2.09	0.01	0.06	1		PREDICTED: R-spondin-1-like [Salmo salar]
contig_0111205	1..497	18.32	-2.95	-7.73	1.35e-14	2.37e-12	3.66e-09	18.32	-1.04	-2.05	1.81e-05	0.000278	1		PREDICTED: myosin heavy chain, fast skeletal muscle-like isoform X1 [Salmo salar]
contig_0063314	1..2062	3.41	-2.96	-7.8	7.58e-12	9.63e-10	2.06e-06	3.41	-1.33	-2.52	3.1e-06	6.02e-05	0.82		PREDICTED: collagen alpha-1(XXII) chain-like isoform X2 [Salmo salar]
contig_0035032	1..409	4.14	-2.99	-7.94	0.000627	0.01	1	4.14	-0.32	-1.25	0.48	0.66	1		PREDICTED: uncharacterized protein LOC106563771 [Salmo salar]
contig_0063011	1..396	4.28	-2.99	-7.94	0.000627	0.01	1	6.85	0.86	1.81	0.02	0.09	1		PREDICTED: uncharacterized protein LOC106583873 [Salmo salar]
contig_0094241	1..2196	1.52	-2.99	-7.94	2.54e-06	0.000111	0.69	1.52	-0.96	-1.94	0.01	0.06	1		PREDICTED: WNT1-inducible-signaling pathway protein 1-like [Salmo salar]
contig_0113641	1..3568	1.1	-3	-8.01	4e-07	2.2e-05	0.11	1.1	-1.07	-2.1	0.00384	0.02	1		PREDICTED: collagen alpha-1(XXVII) chain B-like [Salmo salar]
contig_0167613	1..852	3.29	-3	-7.99	1.4e-05	0.000484	1	3.29	-1.7	-3.25	0.000531	0.00476	1		Annexin A13 [Salmo salar]
contig_0030264	1..2548	0.89	-3.01	-8.06	8.19e-05	0.00214	1	0.89	-1.4	-2.64	0.00512	0.03	1		PREDICTED: glypican-1-like [Salmo salar]
contig_0047150	1..280	4.16	-3.01	-8.06	0.00427	0.04	1	6.53	0.83	1.78	0.06	0.17	1		PREDICTED: desmocollin-2-like isoform X1 [Salmo salar]
contig_0083733	1..612	1.9	-3.01	-8.06	0.00427	0.04	1	1.9	-2	-3.99	0.01	0.05	1		PREDICTED: kinesin-like protein KIF13B isoform X3 [Salmo salar]
contig_0108449	1..211	5.52	-3.01	-8.06	0.00427	0.04	1	5.52	-2	-3.99	0.01	0.05	1		PREDICTED: periplakin-like, partial [Salmo salar]
contig_0151523	1..1354	0.86	-3.01	-8.06	0.00427	0.04	1	0.86	-1.68	-3.21	0.02	0.08	1		not available
contig_0166313	1..2727	0.43	-3.01	-8.06	0.00427	0.04	1	0.43	-1.42	-2.68	0.04	0.12	1		PREDICTED: protein FAM172A-like [Salmo salar]
contig_0289323	1..239	4.87	-3.01	-8.06	0.00427	0.04	1	4.87	-0.7	-1.62	0.22	0.4	1		not available
contig_0033748	1..571	28.65	-3.03	-8.16	1.18e-23	4.43e-21	3.21e-18	28.65	-1.86	-3.63	5.55e-16	7.09e-14	1.48e-10		PREDICTED: neuropilin-1a-like [Salmo salar]
contig_0101057	1..626	9.13	-3.04	-8.22	1.77e-09	1.54e-07	0.000483	9.13	-0.74	-1.67	0.00743	0.04	1		PREDICTED: desmin-like [Salmo salar]
contig_0120418	1..236	55.85	-3.05	-8.28	6.43e-20	1.92e-17	1.75e-14	55.85	-10.66	-1617.8	0.01	0.06	1		PREDICTED: solute carrier family 26 member 6-like isoform X2 [Salmo salar]
contig_0022199	1..505	11.53	-3.06	-8.37	1.25e-09	1.11e-07	0.00034	11.53	-0.92	-1.89	0.00115	0.00896	1		PREDICTED: actin, alpha cardiac [Salmo salar]
contig_0119274	1..1066	4.37	-3.06	-8.35	3.85e-08	2.63e-06	0.01	4.37	-1.7	-3.25	1.8e-05	0.000277	1		PREDICTED: mimecan-like [Salmo salar]
contig_0076333	1..483	2.52	-3.07	-8.42	0.00347	0.04	1	2.52	-1.49	-2.8	0.03	0.1	1		PREDICTED: protein TANC2-like isoform X2 [Salmo salar]
contig_0123418	1..881	1.38	-3.07	-8.42	0.00347	0.04	1	1.38	-7.23	-150.24	0.09	0.22	1		FGF2 [Salmo salar]
contig_0184712	1..1038	1.17	-3.07	-8.42	0.00347	0.04	1	1.17	-0.00228	-1	1	1	1		LIM domain-binding protein 3 [Salmo salar]
contig_0204587	1..643	1.89	-3.07	-8.42	0.00347	0.04	1	1.89	-7.23	-150.24	0.09	0.22	1		PREDICTED: parapinopsin-like [Salmo salar]
contig_0227415	1..1019	1.19	-3.07	-8.42	0.00347	0.04	1	1.19	-1.74	-3.35	0.02	0.07	1		not available
contig_0121333	1..1162	2.05	-3.08	-8.44	5.54e-05	0.00155	1	2.05	-0.36	-1.28	0.37	0.56	1		PREDICTED: neutral cholesterol ester hydrolase 1-like [Salmo salar]
contig_0169380	1..654	9.88	-3.08	-8.44	4.06e-11	4.63e-09	1.1e-05	9.88	-0.97	-1.96	0.00039	0.00372	1		PREDICTED: uncharacterized protein LOC106594830, partial [Salmo salar]
contig_0009197	1..2340	4.82	-3.1	-8.57	1.35e-17	3.3e-15	3.66e-12	6.09	0.52	1.43	0.00378	0.02	1		Deoxyribonuclease gamma precursor [Salmo salar]
contig_0042276	1..1701	4.57	-3.11	-8.62	5.67e-13	8.34e-11	1.54e-07	4.57	-1.06	-2.09	3.95e-05	0.000542	1		PREDICTED: collagen alpha-2(IX) chain-like [Salmo salar]
contig_0129107	1..204	11.94	-3.11	-8.62	4.57e-05	0.00131	1	11.94	-0.5	-1.42	0.21	0.38	1		PREDICTED: TNF receptor-associated factor 1-like [Salmo salar]
contig_0209747	1..2906	0.84	-3.11	-8.62	4.57e-05	0.00131	1	0.84	-1.76	-3.38	0.000915	0.00741	1		PREDICTED: uncharacterized protein LOC106579177 isoform X3 [Salmo salar]
contig_0037901	1..1158	5.21	-3.12	-8.67	1.55e-10	1.6e-08	4.22e-05	8.71	0.92	1.89	1.19e-05	0.000195	1		SPATA5 [Salmo salar]
contig_0100903	1..1236	1.5	-3.12	-8.68	0.000344	0.00676	1	1.5	-0.45	-1.36	0.32	0.5	1		PREDICTED: NACHT, LRR and PYD domains-containing protein 12-like [Salmo salar]
contig_0175149	1..801	2.31	-3.12	-8.68	0.000344	0.00676	1	2.31	-1.87	-3.66	0.00245	0.02	1		PREDICTED: SPARC-related modular calcium-binding protein 1 [Salmo salar]
contig_0184141	1..1929	1.89	-3.12	-8.69	8.27e-07	4.17e-05	0.22	1.89	-1.86	-3.63	4.45e-05	0.000599	1		PREDICTED: transmembrane protein 79-like [Salmo salar]
contig_0100160	1..307	4.14	-3.13	-8.78	0.00282	0.03	1	4.14	-1.81	-3.5	0.01	0.06	1		PREDICTED: target of Nesh-SH3-like isoform X2 [Salmo salar]
contig_0157719	1..406	3.13	-3.13	-8.78	0.00282	0.03	1	3.13	-1.55	-2.92	0.02	0.08	1		PREDICTED: palmitoyltransferase ZDHHC3-like [Salmo salar]
contig_0222337	1..1139	1.12	-3.13	-8.78	0.00282	0.03	1	1.12	-1.33	-2.51	0.04	0.12	1		Thymosin beta-11 [Salmo salar]
contig_0069496	1..1518	2.48	-3.16	-8.94	5.76e-07	3.03e-05	0.16	2.48	-1.01	-2.02	0.00655	0.03	1		PREDICTED: coiled-coil domain-containing protein 80-like [Salmo salar]
contig_0154093	1..756	3.36	-3.17	-9	3.13e-05	0.00096	1	4.5	0.6	1.52	0.07	0.19	1		creatine kinase, mitochondrial 2 [Salmo salar]
contig_0061518	1..2074	4.24	-3.18	-9.04	2.21e-14	3.79e-12	6.02e-09	4.24	-1.39	-2.61	1.54e-07	4.23e-06	0.04		PREDICTED: target of Nesh-SH3 isoform X1 [Salmo salar]
contig_0022197	1..423	19.65	-3.2	-9.21	9.61e-14	1.55e-11	2.61e-08	19.65	-0.22	-1.16	0.32	0.5	1		PREDICTED: actin, alpha cardiac [Salmo salar]
contig_0100607	1..2757	8.41	-3.22	-9.32	9.12e-32	5.69e-29	2.48e-26	8.41	-1.43	-2.7	1.9e-14	1.95e-12	5.06e-09		PREDICTED: MAM domain-containing protein 2-like [Salmo salar]
contig_0173459	1..921	11.9	-3.22	-9.3	2.73e-17	6.43e-15	7.42e-12	11.9	-1.35	-2.55	1.8e-08	6.12e-07	0.0048		PREDICTED: parvalbumin alpha [Salmo salar]
contig_0002659	1..2085	32.6	-3.23	-9.39	7.02e-68	1.88e-64	1.91e-62	32.6	-1.81	-3.5	1.07e-33	7.43e-31	2.85e-28		PREDICTED: periostin-like isoform X2 [Salmo salar]
contig_0060702	1..1574	4.57	-3.23	-9.41	3.26e-12	4.36e-10	8.88e-07	4.57	-1.79	-3.46	1.39e-08	4.87e-07	0.0037		PREDICTED: zinc finger protein 385D-like isoform X1 [Salmo salar]
contig_0119107	1..297	8.91	-3.23	-9.37	2.17e-05	0.000707	1	8.91	-0.45	-1.37	0.24	0.42	1		not available
contig_0132298	1..1675	1.58	-3.23	-9.37	2.17e-05	0.000707	1	1.58	-1.4	-2.63	0.00284	0.02	1		PREDICTED: LIM/homeobox protein Lhx6-like isoform X2 [Salmo salar]
contig_0134018	1..266	5.17	-3.25	-9.51	0.0019	0.02	1	5.17	-1.66	-3.17	0.01	0.06	1		alpha-globin, partial [Salmo salar]
contig_0159210	1..376	3.66	-3.25	-9.51	0.0019	0.02	1	3.66	-1.66	-3.17	0.01	0.06	1		not available
contig_0177416	1..2350	0.59	-3.25	-9.51	0.0019	0.02	1	0.59	-1.92	-3.79	0.00752	0.04	1		PREDICTED: transforming growth factor beta-2-like [Salmo salar]
contig_0231676	1..1104	1.25	-3.25	-9.51	0.0019	0.02	1	1.25	-1.25	-2.39	0.04	0.12	1		PREDICTED: myozenin-2-like [Salmo salar]
contig_0095748	1..2717	1.25	-3.27	-9.64	1.84e-06	8.41e-05	0.5	1.25	-1.75	-3.37	0.000132	0.00151	1		PREDICTED: brevican core protein-like isoform X2 [Salmo salar]
contig_0023255	1..488	2.93	-3.3	-9.88	0.00157	0.02	1	2.93	-0.99	-1.99	0.08	0.2	1		myosin 1, partial [Salmo salar]
contig_0104548	1..1134	1.26	-3.3	-9.88	0.00157	0.02	1	1.26	-0.51	-1.42	0.31	0.5	1		vacuolar protein sorting-associated protein 52-like protein [Salmo salar]
contig_0124867	1..1808	0.79	-3.3	-9.88	0.00157	0.02	1	0.79	-0.99	-1.99	0.08	0.2	1		PREDICTED: A disintegrin and metalloproteinase with thrombospondin motifs 2-like, partial [Salmo salar]
contig_0151990	1..295	4.85	-3.3	-9.88	0.00157	0.02	1	4.85	-0.41	-1.33	0.4	0.59	1		PREDICTED: glucose-6-phosphate isomerase-like [Salmo salar]
contig_0038443	1..503	4.21	-3.31	-9.91	0.000134	0.00319	1	4.21	-1.3	-2.45	0.01	0.05	1		not available
contig_0188941	1..931	3.01	-3.31	-9.93	1.26e-05	0.000444	1	3.01	-0.9	-1.86	0.03	0.1	1		Heat shock protein Hsp-16.1/Hsp-16.11 [Salmo salar]
contig_0142288	1..1290	8.29	-3.36	-10.28	5.48e-17	1.24e-14	1.49e-11	8.29	-10.36	-1312.6	0.02	0.07	1		interleukin-17A/F3 [Salmo salar]
contig_0170370	1..2692	0.55	-3.36	-10.24	0.00131	0.02	1	0.55	-1.77	-3.41	0.00794	0.04	1		PREDICTED: synaptopodin-2-like isoform X3 [Salmo salar]
contig_0276898	1..828	1.79	-3.36	-10.24	0.00131	0.02	1	1.79	-1.55	-2.93	0.01	0.06	1		PREDICTED: tetratricopeptide repeat protein 28-like [Salmo salar]
contig_0057621	1..749	2.05	-3.41	-10.6	0.00109	0.02	1	2.05	-1.82	-3.53	0.00618	0.03	1		not available
contig_0081890	1..952	1.61	-3.41	-10.6	0.00109	0.02	1	1.61	-0.61	-1.53	0.22	0.4	1		PREDICTED: WAP four-disulfide core domain protein 1-like [Salmo salar]
contig_0084393	1..544	2.82	-3.41	-10.6	0.00109	0.02	1	2.82	-0.42	-1.34	0.38	0.57	1		PREDICTED: chordin-like [Salmo salar]
contig_0128906	1..715	2.15	-3.41	-10.6	0.00109	0.02	1	2.15	-0.96	-1.94	0.07	0.2	1		Tripartite motif-containing protein 25 [Salmo salar]
contig_0209513	1..1211	1.27	-3.41	-10.6	0.00109	0.02	1	1.27	-0.72	-1.65	0.16	0.32	1		not available
contig_0237655	1..378	6.02	-3.41	-10.65	7.86e-05	0.00206	1	7.01	0.4	1.32	0.27	0.45	1		PREDICTED: calmodulin-binding transcription activator 1-like isoform X9 [Salmo salar]
contig_0196424	1..471	7.98	-3.42	-10.69	5.56e-07	2.95e-05	0.15	7.98	-0.67	-1.59	0.05	0.16	1		PREDICTED: forkhead box protein K1-like, partial [Salmo salar]
contig_0171284	1..1072	2.17	-3.45	-10.9	6.61e-05	0.00179	1	2.17	-0.44	-1.36	0.28	0.47	1		PREDICTED: leucine-rich repeat protein soc-2 homolog [Salmo salar]
contig_0095038	1..487	3.26	-3.46	-10.97	0.000909	0.01	1	3.26	-1.65	-3.14	0.00836	0.04	1		PREDICTED: uncharacterized protein LOC106586990 [Salmo salar]
contig_0230254	1..1871	0.85	-3.46	-10.97	0.000909	0.01	1	0.85	-0.15	-1.11	0.74	0.85	1		PREDICTED: tenascin-R-like [Salmo salar]
contig_0060998	1..203	11.73	-3.48	-11.15	5.58e-05	0.00156	1	11.73	-1.35	-2.55	0.00531	0.03	1		PREDICTED: myosin heavy chain, fast skeletal muscle-like isoform X2 [Salmo salar]
contig_0210909	1..667	2.46	-3.5	-11.33	0.000763	0.01	1	2.46	-1.34	-2.53	0.02	0.08	1		PREDICTED: rho GTPase-activating protein 6-like isoform X1 [Salmo salar]
contig_0092086	1..799	3.11	-3.54	-11.64	3.99e-05	0.00117	1	3.11	-1.41	-2.66	0.0034	0.02	1		PREDICTED: chemokine-like receptor 1 [Salmo salar]
contig_0113633	1..1222	3.38	-3.55	-11.74	1.8e-07	1.07e-05	0.05	3.38	-1.09	-2.14	0.00272	0.02	1		PREDICTED: target of Nesh-SH3 isoform X2 [Salmo salar]
contig_0149592	1..940	1.8	-3.55	-11.7	0.000643	0.01	1	1.8	-1.74	-3.35	0.0051	0.03	1		PREDICTED: myotubularin-related protein 11-like isoform X1 [Salmo salar]
contig_0057791	1..559	4.55	-3.57	-11.89	3.39e-05	0.00103	1	4.55	-0.9	-1.87	0.03	0.12	1		PREDICTED: BOLA class I histocompatibility antigen, alpha chain BL3-7-like [Salmo salar]
contig_0097464	1..2971	0.86	-3.57	-11.89	3.39e-05	0.00103	1	0.86	-0.56	-1.48	0.16	0.32	1		PREDICTED: slit homolog 1 protein-like isoform X2 [Salmo salar]
contig_0056434	1..474	3.69	-3.59	-12.06	0.000543	0.00965	1	3.69	-1.14	-2.21	0.03	0.11	1		SPATA5 [Salmo salar]
contig_0051634	1..3158	0.84	-3.63	-12.38	2.46e-05	0.000784	1	0.84	-1.5	-2.83	0.00174	0.01	1		PREDICTED: teashirt homolog 1-like [Salmo salar]
contig_0003818	1..361	4.99	-3.64	-12.42	0.00046	0.00851	1	4.99	-1.64	-3.12	0.00539	0.03	1		PREDICTED: bromodomain-containing protein 1-like, partial [Salmo salar]
contig_0029252	1..592	3.04	-3.64	-12.42	0.00046	0.00851	1	3.04	-1.83	-3.56	0.00313	0.02	1		PREDICTED: eosinophil peroxidase-like [Salmo salar]
contig_0151871	1..1149	1.61	-3.68	-12.79	0.000391	0.0075	1	1.61	-0.45	-1.36	0.32	0.5	1		PREDICTED: semaphorin-3C-like [Salmo salar]
contig_0054034	1..384	4.96	-3.72	-13.15	0.000334	0.0066	1	4.96	-0.92	-1.9	0.06	0.16	1		PREDICTED: E3 ubiquitin-protein ligase parkin [Salmo salar]
contig_0080008	1..2209	22.17	-3.74	-13.38	7e-58	1.45e-54	1.91e-52	22.17	-1.63	-3.1	2.71e-25	1.04e-22	7.21e-20		PREDICTED: elastin-like isoform X7 [Salmo salar]
contig_0082592	1..1785	1.66	-3.79	-13.86	9.81e-06	0.000358	1	1.66	-0.73	-1.66	0.06	0.17	1		PREDICTED: ATP-dependent 6-phosphofructokinase, muscle type-like [Salmo salar]
contig_0114181	1..1213	1.66	-3.79	-13.88	0.000245	0.00518	1	1.66	-1.11	-2.15	0.02	0.09	1		PREDICTED: tenascin-like [Salmo salar]
contig_0146141	1..1743	2.82	-3.81	-14	1.95e-08	1.4e-06	0.00529	2.82	-0.97	-1.97	0.00153	0.01	1		Corticotropin-releasing factor-binding protein precursor [Salmo salar]
contig_0191098	1..691	2.99	-3.83	-14.24	0.00021	0.00458	1	2.99	-7.99	-254.13	0.06	0.17	1		PREDICTED: uncharacterized protein LOC106586060, partial [Salmo salar]
contig_0079038	1..1109	4.58	-3.85	-14.45	1.28e-08	9.53e-07	0.00348	4.58	-1.75	-3.37	1.54e-06	3.27e-05	0.41		PREDICTED: stonustoxin subunit beta-like isoform X2 [Salmo salar]
contig_0119290	1..1875	16.01	-3.85	-14.47	1.48e-39	1.5e-36	4.04e-34	16.01	-1.61	-3.04	2.09e-19	4.09e-17	5.55e-14		PREDICTED: collagenase 3-like [Salmo salar]
contig_0284239	1..356	9.07	-3.92	-15.1	4.78e-06	0.000191	1	9.07	-1.4	-2.65	0.00111	0.00871	1		PREDICTED: syncoilin [Salmo salar]
contig_0116909	1..3453	0.97	-3.96	-15.59	3.62e-06	0.00015	0.99	0.97	-1.83	-3.57	9.71e-05	0.00116	1		PREDICTED: multiple epidermal growth factor-like domains protein 6 isoform X1 [Salmo salar]
contig_0025075	1..246	9.25	-3.97	-15.7	0.000118	0.00287	1	9.25	-0.99	-1.98	0.03	0.1	1		PREDICTED: insulin-like growth factor-binding protein-like 1 [Salmo salar]
contig_0100779	1..1095	2.08	-3.97	-15.7	0.000118	0.00287	1	2.08	-1.98	-3.94	0.000629	0.00545	1		PREDICTED: claudin-19-like isoform X1 [Salmo salar]
contig_0115941	1..2590	8.46	-3.98	-15.82	3.06e-30	1.75e-27	8.32e-25	8.46	-0.63	-1.55	0.000187	0.00202	1		PREDICTED: thrombin-like enzyme cerastocytin [Salmo salar]
contig_0044058	1..742	1.64	-4	-16	0.00461	0.05	1	1.64	-0.5	-1.41	0.35	0.55	1		not available
contig_0080352	1..2223	0.55	-4	-16	0.00461	0.05	1	0.55	-0.76	-1.69	0.18	0.35	1		UPF0527 membrane protein [Salmo salar]
contig_0086796	1..298	4.09	-4	-16	0.00461	0.05	1	4.09	-0.5	-1.41	0.35	0.55	1		olfactory receptor family C subfamily 4 member 1 [Salmo salar]
contig_0088071	1..1461	3.84	-4	-15.95	3.37e-09	2.78e-07	0.000916	6.86	1.02	2.02	1.97e-06	4.07e-05	0.52		PREDICTED: FYN-binding protein-like [Salmo salar]
contig_0110111	1..1142	1.07	-4	-16	0.00461	0.05	1	1.07	-1.74	-3.35	0.02	0.07	1		PREDICTED: nebulin [Salmo salar]
contig_0146808	1..206	5.91	-4	-16	0.00461	0.05	1	5.91	-0.63	-1.54	0.26	0.45	1		PREDICTED: protein crumbs homolog 1-like [Salmo salar]
contig_0159771	1..1094	1.11	-4	-16	0.00461	0.05	1	1.11	-1.27	-2.41	0.05	0.14	1		PREDICTED: gliomedin-like isoform X3 [Salmo salar]
contig_0065511	1..3474	1.66	-4.04	-16.4	2.29e-09	1.94e-07	0.000624	1.66	-1.52	-2.88	2.89e-06	5.65e-05	0.77		Complement component C6 precursor [Salmo salar]
contig_0051135	1..615	2.07	-4.06	-16.69	0.00399	0.04	1	2.07	-1.55	-2.92	0.02	0.08	1		not available
contig_0140167	1..282	4.51	-4.06	-16.69	0.00399	0.04	1	4.51	-0.45	-1.36	0.39	0.58	1		PREDICTED: uncharacterized protein LOC106572013 isoform X1 [Salmo salar]
contig_0176780	1..1085	1.17	-4.06	-16.69	0.00399	0.04	1	1.17	-7.29	-156.73	0.09	0.22	1		PREDICTED: 40S ribosomal protein S5-like [Salmo salar]
contig_0219531	1..341	3.73	-4.06	-16.69	0.00399	0.04	1	3.73	-7.29	-156.73	0.09	0.22	1		PREDICTED: tubulin-specific chaperone D-like [Salmo salar]
contig_0092368	1..1176	2.12	-4.1	-17.15	6.81e-05	0.00184	1	2.12	-1.79	-3.45	0.000726	0.00613	1		not available
contig_0084284	1..5605	2.35	-4.11	-17.23	2.49e-19	7.04e-17	6.78e-14	2.35	-1.57	-2.97	1.98e-11	1.24e-09	5.26e-06		PREDICTED: thrombospondin-2-like isoform X1 [Salmo salar]
contig_0121391	1..672	1.97	-4.12	-17.38	0.00347	0.04	1	1.97	-1.86	-3.64	0.0097	0.05	1		PREDICTED: collagen alpha-1(II) chain isoform X1 [Salmo salar]
contig_0158950	1..1371	0.97	-4.12	-17.38	0.00347	0.04	1	0.97	-0.74	-1.68	0.17	0.34	1		PREDICTED: type I inositol 3,4-bisphosphate 4-phosphatase-like isoform X5 [Salmo salar]
contig_0256167	1..1684	0.79	-4.12	-17.38	0.00347	0.04	1	0.79	-1.39	-2.62	0.03	0.1	1		PREDICTED: procyclic form-specific polypeptide B1-alpha-like isoform X1 [Salmo salar]
contig_0253529	1..1753	1.48	-4.16	-17.88	5.25e-05	0.00148	1	1.48	-1.09	-2.13	0.01	0.06	1		PREDICTED: endonuclease domain-containing 1 protein-like isoform X1 [Salmo salar]
contig_0031254	1..572	2.41	-4.18	-18.07	0.00302	0.03	1	2.41	-0.46	-1.37	0.37	0.56	1		PREDICTED: transposon Tf2-1 polyprotein [Salmo salar]
contig_0059062	1..381	3.61	-4.18	-18.07	0.00302	0.03	1	3.61	-1.66	-3.17	0.01	0.06	1		PREDICTED: putative proline-rich protein 21, partial [Salmo salar]
contig_0146737	1..1284	1.07	-4.18	-18.07	0.00302	0.03	1	1.07	-1.09	-2.12	0.06	0.17	1		PREDICTED: uncharacterized protein LOC106582803 isoform X2 [Salmo salar]
contig_0156432	1..358	3.84	-4.18	-18.07	0.00302	0.03	1	3.84	-1.92	-3.79	0.00752	0.04	1		not available
contig_0159911	1..287	4.8	-4.18	-18.07	0.00302	0.03	1	4.8	-1.92	-3.79	0.00752	0.04	1		PREDICTED: pantothenate kinase 1-like isoform X2 [Salmo salar]
contig_0080477	1..1735	8.82	-4.2	-18.34	1e-21	3.3e-19	2.73e-16	8.82	-1.67	-3.19	1.38e-13	1.21e-11	3.67e-08		PREDICTED: microtubule-associated protein tau-like isoform X4 [Salmo salar]
contig_0121583	1..1655	0.86	-4.23	-18.77	0.00265	0.03	1	0.86	-1.97	-3.93	0.00585	0.03	1		Transposable element Tcb1 transposase [Salmo salar]
contig_0045503	1..888	17.77	-4.24	-18.91	3.56e-22	1.21e-19	9.69e-17	17.77	-0.47	-1.39	0.00926	0.05	1		PREDICTED: troponin I, fast skeletal muscle-like [Salmo salar]
contig_0159122	1..1396	1.1	-4.33	-20.15	0.00205	0.03	1	1.1	-0.72	-1.65	0.16	0.32	1		PREDICTED: filamin-C-like isoform X1 [Salmo salar]
contig_0160344	1..1610	0.95	-4.33	-20.15	0.00205	0.03	1	0.95	-7.56	-189.2	0.08	0.2	1		PREDICTED: collagen alpha-2(VI) chain-like isoform X1 [Salmo salar]
contig_0184004	1..634	2.42	-4.33	-20.15	0.00205	0.03	1	2.42	-0.72	-1.65	0.16	0.32	1		creatine kinase-3 [Salmo salar]
contig_0064016	1..785	2.02	-4.38	-20.84	0.00181	0.02	1	2.02	-7.61	-195.69	0.08	0.2	1		PREDICTED: endogenous retrovirus group 3 member 1 Env polyprotein-like [Salmo salar]
contig_0158734	1..1107	21.52	-4.42	-21.46	7.8e-31	4.62e-28	2.12e-25	21.52	-0.74	-1.67	8.99e-06	0.000153	1		PREDICTED: trypsin-3-like isoform X1 [Salmo salar]
contig_0009106	1..1445	1.14	-4.43	-21.53	0.00161	0.02	1	1.14	-7.66	-202.18	0.07	0.19	1		PREDICTED: aggrecan core protein-like isoform X4 [Salmo salar]
contig_0150790	1..2461	0.67	-4.43	-21.53	0.00161	0.02	1	0.67	-1.51	-2.84	0.01	0.05	1		PREDICTED: nebulin isoform X5 [Salmo salar]
contig_0039823	1..684	2.48	-4.47	-22.22	0.00143	0.02	1	2.48	-0.04	-1.03	0.92	0.96	1		PREDICTED: uncharacterized protein LOC106577515 [Salmo salar]
contig_0097885	1..967	1.75	-4.47	-22.22	0.00143	0.02	1	1.75	-0.97	-1.97	0.06	0.17	1		PREDICTED: titin-like [Salmo salar]
contig_0139291	1..828	2.05	-4.47	-22.22	0.00143	0.02	1	2.05	-1.96	-3.89	0.00294	0.02	1		PREDICTED: uncharacterized protein LOC106560259 [Salmo salar]
contig_0137110	1..2129	1.54	-4.5	-22.61	1.12e-05	0.0004	1	1.54	-8.66	-403.49	0.04	0.13	1		PREDICTED: extracellular sulfatase Sulf-1 isoform X5 [Salmo salar]
contig_0242707	1..1098	3.04	-4.52	-22.98	1.01e-05	0.000366	1	3.04	-8.68	-409.98	0.04	0.13	1		PREDICTED: apoptosis-inducing factor 3-like isoform X1 [Salmo salar]
contig_0269595	1..725	2.41	-4.52	-22.92	0.00127	0.02	1	2.41	-1.79	-3.45	0.00399	0.02	1		PREDICTED: F-box/LRR-repeat protein 13 isoform X1 [Salmo salar]
contig_0085437	1..871	2.07	-4.56	-23.61	0.00114	0.02	1	2.07	-0.65	-1.57	0.17	0.33	1		PREDICTED: chemokine-like receptor 1 [Salmo salar]
contig_0067549	1..354	34.69	-4.65	-25.08	1.17e-16	2.57e-14	3.17e-11	34.69	-1.67	-3.18	1.15e-11	7.52e-10	3.07e-06		Tripartite motif-containing protein 25 [Salmo salar]
contig_0243593	1..3346	1.63	-4.67	-25.47	3.63e-08	2.49e-06	0.00988	1.63	-1.21	-2.31	9.92e-05	0.00118	1		PREDICTED: myosin-binding protein C, fast-type-like [Salmo salar]
contig_0097844	1..794	6.93	-4.68	-25.72	3.3e-08	2.27e-06	0.00896	6.93	-9.4	-676.22	0.03	0.1	1		PREDICTED: nucleotide-binding oligomerization domain-containing protein 2 isoform X2 [Salmo salar]
contig_0064833	1..5095	2.52	-4.72	-26.27	4.07e-17	9.37e-15	1.11e-11	2.52	-1.97	-3.91	2.71e-14	2.7e-12	7.22e-09		PREDICTED: laminin subunit beta-4 isoform X1 [Salmo salar]
contig_0090956	1..3401	1.68	-4.74	-26.7	2.24e-08	1.6e-06	0.00611	1.68	-1.46	-2.75	5.79e-06	0.000104	1		Fatty acid-binding protein, intestinal [Salmo salar]
contig_0032847	1..701	3.32	-4.93	-30.52	0.000414	0.00784	1	3.32	0.02	1.01	0.96	0.98	1		not available
contig_0072757	1..653	3.65	-4.96	-31.21	0.000378	0.00728	1	3.65	-0.73	-1.66	0.08	0.21	1		Transposable element Tcb2 transposase [Salmo salar]
contig_0113763	1..646	3.85	-5.03	-32.6	0.000316	0.00633	1	3.85	0.09	1.06	0.81	0.89	1		PREDICTED: uncharacterized protein LOC106590369 [Salmo salar]
contig_0037907	1..1776	2.77	-5.08	-33.89	6.08e-07	3.18e-05	0.17	2.77	-9.24	-604.79	0.03	0.11	1		not available
contig_0132649	1..2080	2.98	-5.41	-42.63	1.01e-07	6.32e-06	0.03	2.98	-0.98	-1.97	0.000472	0.00434	1		PREDICTED: L-lactate dehydrogenase A chain-like [Salmo salar]
contig_0153925	1..837	3.98	-5.45	-43.66	9.03e-05	0.00233	1	3.98	-1.63	-3.09	0.000273	0.00276	1		PREDICTED: desmin-like [Salmo salar]
contig_0077984	1..1088	5.74	-6.35	-81.69	4.58e-06	0.000185	1	5.74	-9.58	-767.13	0.02	0.09	1		hypothetical protein [Salmo salar]
contig_0054364	1..2352	3.92	-6.91	-120.41	5.26e-07	2.81e-05	0.14	7.4	1.1	2.14	1.14e-09	5.03e-08	0.000302		Transposable element Tcb1 transposase [Salmo salar]
contig_0170371	1..923	11.36	-7.1	-137.01	2.56e-07	1.47e-05	0.07	11.36	-1.15	-2.22	9.24e-07	2.08e-05	0.25		PREDICTED: uncharacterized protein LOC106609103 isoform X4 [Salmo salar]
contig_0217969	1..2515	20.08	-7.16	-143.41	2.98e-28	1.51e-25	8.09e-23	20.08	-1.4	-2.65	2.01e-20	4.47e-18	5.35e-15		PREDICTED: phosphatase and actin regulator 3-like [Salmo salar]
contig_0245273	1..1183	21.61	-7.46	-175.82	9.64e-14	1.55e-11	2.62e-08	21.61	0.02	1.01	0.91	0.95	1		PREDICTED: liprin-alpha-4-like isoform X2 [Salmo salar]
contig_0056186	1..1519	9.13	-7.5	-181.26	5.02e-08	3.35e-06	0.01	9.13	-1.49	-2.81	4.21e-11	2.49e-09	1.12e-05		PREDICTED: uncharacterized protein LOC106570150 [Salmo salar]

## Sheet: Gill SS
Name	Chromosome	Region	Max group mean	Log₂ fold change	Fold change	P-value	FDR p-value	Bonferroni	Max group mean	Log₂ fold change	Fold change	P-value	FDR p-value	Bonferroni		Description
contig_0143247	contig_0143247	1..2147	0	NaN	NaN	NaN	NaN	NaN	3.14	10.06	1063.79	0.01	0.05	1		not available
contig_0283034	contig_0283034	1..983	0	NaN	NaN	NaN	NaN	NaN	7.76	10.23	1202.83	0.009	0.04	1		interleukin-17A/F3 [Salmo salar]
contig_0098448	contig_0098448	1..351	2.65	4.01	16.13	0.00461	NaN	1	2.16	3.85	14.39	0.00698	0.04	1		not available
contig_0034864	contig_0034864	1..230	3.75	3.91	14.98	0.00595	NaN	1	3.84	4.07	16.77	0.00411	0.02	1		PREDICTED: cardiolipin synthase (CMP-forming) isoform X1 [Salmo salar]
contig_0107018	contig_0107018	1..778	0.85	3.53	11.56	0.01	NaN	1	1.38	4.35	20.34	0.00203	0.01	1		PREDICTED: alpha-N-acetylgalactosaminide alpha-2,6-sialyltransferase 2-like [Salmo salar]
contig_0154188	contig_0154188	1..748	0.89	3.53	11.56	0.01	NaN	1	1.18	4.07	16.77	0.00411	0.02	1		PREDICTED: PCTP-like protein [Salmo salar]
contig_0069794	contig_0069794	1..1656	0.36	3.38	10.41	0.02	NaN	1	0.61	4.26	19.15	0.00254	0.02	1		not available
contig_0106445	contig_0106445	1..1128	0.53	3.38	10.41	0.02	NaN	1	0.84	4.17	17.96	0.00322	0.02	1		PREDICTED: DNA-directed RNA polymerase II subunit RPB1-like [Salmo salar]
contig_0081309	contig_0081309	1..1226	0.43	3.21	9.27	0.03	NaN	1	1.03	4.58	23.9	0.00109	0.00855	1		PREDICTED: C-X-C chemokine receptor type 1-like [Salmo salar]
contig_0082777	contig_0082777	1..327	1.62	3.21	9.27	0.03	NaN	1	2.31	3.85	14.39	0.00698	0.04	1		not available
contig_0085057	contig_0085057	1..330	1.61	3.21	9.27	0.03	NaN	1	2.48	3.96	15.58	0.00532	0.03	1		PREDICTED: upstream stimulatory factor 2-like [Salmo salar]
contig_0122745	contig_0122745	1..1094	0.42	3.02	8.13	0.04	NaN	1	0.75	3.96	15.58	0.00532	0.03	1		PREDICTED: bromodomain-containing protein 1-like, partial [Salmo salar]
contig_0126976	contig_0126976	1..350	1.33	3.02	8.13	0.04	NaN	1	2.16	3.85	14.39	0.00698	0.04	1		PREDICTED: LOW QUALITY PROTEIN: tetratricopeptide repeat protein 7B [Salmo salar]
contig_0038768	contig_0038768	1..670	1.29	3	7.98	0.00544	NaN	1	1.41	3.26	9.55	0.00232	0.02	1		PREDICTED: nesprin-1 isoform X9 [Salmo salar]
contig_0073868	contig_0073868	1..2280	0.38	3	7.98	0.00544	NaN	1	0.3	2.81	7.02	0.00999	0.05	1		collagen Type XI Alpha2 [Salmo salar]
contig_0035982	contig_0035982	1..297	2.68	2.88	7.37	0.00784	NaN	1	2.76	3.05	8.29	0.00467	0.03	1		PREDICTED: protein FAM195A-like [Salmo salar]
contig_0351192	contig_0351192	1..307	2.59	2.88	7.37	0.00784	NaN	1	2.26	2.81	7.02	0.00999	0.05	1		PREDICTED: transmembrane protein 150B-like [Salmo salar]
contig_0082987	contig_0082987	1..206	1.93	2.8	6.98	0.06	NaN	1	5.51	4.43	21.52	0.00164	0.01	1		not available
contig_0085581	contig_0085581	1..200	1.99	2.8	6.98	0.06	NaN	1	3.78	3.85	14.39	0.00698	0.04	1		PREDICTED: GMP reductase 1-like, partial [Salmo salar]
contig_0145367	contig_0145367	1..1051	0.38	2.8	6.98	0.06	NaN	1	0.72	3.85	14.39	0.00698	0.04	1		not available
contig_0182840	contig_0182840	1..2230	0.18	2.8	6.98	0.06	NaN	1	0.37	3.96	15.58	0.00532	0.03	1		not available
contig_0182944	contig_0182944	1..333	1.2	2.8	6.98	0.06	NaN	1	3.22	4.35	20.34	0.00203	0.01	1		not available
contig_0193458	contig_0193458	1..530	0.75	2.8	6.98	0.06	NaN	1	1.55	3.96	15.58	0.00532	0.03	1		PREDICTED: SRSF protein kinase 2-like isoform X6 [Salmo salar]
contig_0013720	contig_0013720	1..836	0.87	2.76	6.76	0.01	NaN	1	0.91	2.94	7.66	0.00678	0.04	1		PREDICTED: solute carrier family 43 member 3-like [Salmo salar]
contig_0065027	contig_0065027	1..1239	0.59	2.76	6.76	0.01	NaN	1	0.87	3.43	10.81	0.00121	0.00929	1		not available
contig_0106894	contig_0106894	1..384	1.9	2.76	6.76	0.01	NaN	1	1.97	2.94	7.66	0.00678	0.04	1		PREDICTED: speckle-type POZ protein-like A [Salmo salar]
contig_0014315	contig_0014315	1..306	2.17	2.62	6.15	0.02	NaN	1	2.47	2.94	7.66	0.00678	0.04	1		PREDICTED: DNA repair protein REV1-like [Salmo salar]
contig_0016829	contig_0016829	1..323	2.05	2.62	6.15	0.02	NaN	1	2.34	2.94	7.66	0.00678	0.04	1		PREDICTED: GPI inositol-deacylase isoform X2 [Salmo salar]
contig_0143612	contig_0143612	1..354	1.87	2.62	6.15	0.02	NaN	1	2.32	3.05	8.29	0.00467	0.03	1		not available
contig_0148220	contig_0148220	1..333	1.99	2.62	6.15	0.02	NaN	1	2.27	2.94	7.66	0.00678	0.04	1		PREDICTED: inactive phospholipase C-like protein 2 isoform X1 [Salmo salar]
contig_0200030	contig_0200030	1..1170	0.57	2.62	6.15	0.02	NaN	1	0.59	2.81	7.02	0.00999	0.05	1		not available
contig_0015307	contig_0015307	1..1934	0.48	2.55	5.85	0.00543	0.05	1	0.52	2.79	6.94	0.00207	0.01	1		PREDICTED: transcription factor HES-5-like [Salmo salar]
contig_0124506	contig_0124506	1..388	2.39	2.55	5.85	0.00543	0.05	1	3.25	3.11	8.66	0.000487	0.00444	1		PREDICTED: apoptosis-stimulating of p53 protein 2-like isoform X5 [Salmo salar]
contig_0072632	contig_0072632	1..448	0.74	2.55	5.84	0.09	NaN	1	1.97	4.07	16.77	0.00411	0.02	1		PREDICTED: far upstream element-binding protein 3-like isoform X3 [Salmo salar]
contig_0079641	contig_0079641	1..496	0.67	2.55	5.84	0.09	NaN	1	1.78	4.07	16.77	0.00411	0.02	1		PREDICTED: mucin-5AC-like [Salmo salar]
contig_0182081	contig_0182081	1..991	0.33	2.55	5.84	0.09	NaN	1	1.02	4.26	19.15	0.00254	0.02	1		PREDICTED: dynamin-binding protein isoform X3 [Salmo salar]
contig_0217419	contig_0217419	1..1333	0.25	2.55	5.84	0.09	NaN	1	0.71	4.17	17.96	0.00322	0.02	1		PREDICTED: RING finger protein 151-like [Salmo salar]
contig_0041470	contig_0041470	1..359	1.66	2.47	5.54	0.03	NaN	1	2.11	2.94	7.66	0.00678	0.04	1		UPF0527 membrane protein [Salmo salar]
contig_0071891	contig_0071891	1..541	1.1	2.47	5.54	0.03	NaN	1	1.63	3.16	8.92	0.00327	0.02	1		not available
contig_0122912	contig_0122912	1..1933	0.31	2.47	5.54	0.03	NaN	1	0.52	3.35	10.18	0.00166	0.01	1		PREDICTED: voltage-dependent calcium channel subunit alpha-2/delta-2-like [Salmo salar]
contig_0129036	contig_0129036	1..693	0.86	2.47	5.54	0.03	NaN	1	1.64	3.52	11.45	0.000887	0.00723	1		PREDICTED: zinc finger CW-type PWWP domain protein 1-like, partial [Salmo salar]
contig_0195186	contig_0195186	1..318	1.88	2.47	5.54	0.03	NaN	1	2.18	2.81	7.02	0.00999	0.05	1		PREDICTED: cilia- and flagella-associated protein 57-like isoform X4 [Salmo salar]
contig_0045880	contig_0045880	1..1590	0.54	2.44	5.44	0.00812	0.07	1	0.59	2.7	6.51	0.00305	0.02	1		not available
contig_0124604	contig_0124604	1..824	1.05	2.44	5.44	0.00812	0.07	1	0.92	2.38	5.21	0.01	0.05	1		PREDICTED: trichohyalin-like isoform X1 [Salmo salar]
contig_0074269	contig_0074269	1..1151	0.69	2.33	5.02	0.01	NaN	1	0.88	2.79	6.94	0.00207	0.01	1		not available
contig_0088677	contig_0088677	1..384	2.07	2.33	5.02	0.01	NaN	1	2.46	2.7	6.51	0.00305	0.02	1		not available
contig_0063553	contig_0063553	1..256	2.07	2.3	4.94	0.04	NaN	1	2.96	2.94	7.66	0.00678	0.04	1		PREDICTED: uncharacterized protein LOC106608774 isoform X2 [Salmo salar]
contig_0078027	contig_0078027	1..374	1.42	2.3	4.94	0.04	NaN	1	4.05	3.93	15.24	0.000168	0.00185	1		not available
contig_0082211	contig_0082211	1..224	2.37	2.3	4.94	0.04	NaN	1	3.94	3.16	8.92	0.00327	0.02	1		PREDICTED: coronin-2B-like [Salmo salar]
contig_0111016	contig_0111016	1..370	1.43	2.3	4.94	0.04	NaN	1	2.39	3.16	8.92	0.00327	0.02	1		PREDICTED: sentrin-specific protease 5 [Salmo salar]
contig_0004482	contig_0004482	1..1571	0.63	2.25	4.75	0.00603	0.06	1	0.84	2.78	6.89	0.000459	0.00424	1		not available
contig_0062299	contig_0062299	1..285	3.49	2.25	4.75	0.00603	0.06	1	3.1	2.2	4.61	0.00756	0.04	1		PREDICTED: uncharacterized protein LOC106611326 isoform X1 [Salmo salar]
contig_0077513	contig_0077513	1..288	3.46	2.25	4.75	0.00603	0.06	1	4.16	2.64	6.24	0.00098	0.00785	1		not available
contig_0086998	contig_0086998	1..771	1.29	2.25	4.75	0.00603	0.06	1	1.14	2.2	4.61	0.00756	0.04	1		UPF0527 membrane protein [Salmo salar]
contig_0034837	contig_0034837	1..374	0.71	2.23	4.7	0.15	NaN	1	3.88	4.78	27.47	0.000625	0.00543	1		Transposable element Tcb1 transposase [Salmo salar]
contig_0075120	contig_0075120	1..1296	0.2	2.23	4.7	0.15	NaN	1	0.68	4.07	16.77	0.00411	0.02	1		FGF2 [Salmo salar]
contig_0136056	contig_0136056	1..508	0.52	2.23	4.7	0.15	NaN	1	1.86	4.17	17.96	0.00322	0.02	1		PREDICTED: selenoprotein W [Salmo salar]
contig_0002421	contig_0002421	1..676	1.08	2.2	4.61	0.02	NaN	1	1.21	2.5	5.64	0.00684	0.04	1		not available
contig_0035192	contig_0035192	1..714	1.02	2.2	4.61	0.02	NaN	1	1.15	2.5	5.64	0.00684	0.04	1		Lipoma HMGIC fusion partner-like 4 protein [Salmo salar]
contig_0156024	contig_0156024	1..1218	0.6	2.2	4.61	0.02	NaN	1	0.88	2.88	7.37	0.00142	0.01	1		not available
contig_0170871	contig_0170871	1..822	0.89	2.2	4.61	0.02	NaN	1	1.15	2.7	6.51	0.00305	0.02	1		PREDICTED: transmembrane protease serine 13-like [Salmo salar]
contig_0264283	contig_0264283	1..269	2.71	2.2	4.61	0.02	NaN	1	3.28	2.6	6.07	0.00454	0.03	1		not available
contig_0151631	contig_0151631	1..434	2.14	2.15	4.44	0.00914	0.07	1	2.47	2.48	5.59	0.00216	0.01	1		Vacuolar protein sorting-associating protein 4B [Salmo salar]
contig_0005536	contig_0005536	1..231	2.01	2.11	4.33	0.06	NaN	1	3.55	3.05	8.29	0.00467	0.03	1		PREDICTED: serine/threonine-protein kinase PAK 2-like isoform X2 [Salmo salar]
contig_0007854	contig_0007854	1..607	0.77	2.11	4.33	0.06	NaN	1	1.25	2.94	7.66	0.00678	0.04	1		Transposable element Tcb1 transposase [Salmo salar]
contig_0037131	contig_0037131	1..1507	0.31	2.11	4.33	0.06	NaN	1	0.46	2.81	7.02	0.00999	0.05	1		reverse transcriptase-like protein [Salmo salar]
contig_0064056	contig_0064056	1..724	0.64	2.11	4.33	0.06	NaN	1	0.96	2.81	7.02	0.00999	0.05	1		FGF2 [Salmo salar]
contig_0120434	contig_0120434	1..1399	0.33	2.11	4.33	0.06	NaN	1	0.5	2.81	7.02	0.00999	0.05	1		PREDICTED: basement membrane-specific heparan sulfate proteoglycan core protein-like isoform X18 [Salmo salar]
contig_0146770	contig_0146770	1..671	0.69	2.11	4.33	0.06	NaN	1	1.03	2.81	7.02	0.00999	0.05	1		not available
contig_0166299	contig_0166299	1..474	0.98	2.11	4.33	0.06	NaN	1	1.86	3.16	8.92	0.00327	0.02	1		PREDICTED: protein PRRC2B-like isoform X4 [Salmo salar]
contig_0075042	contig_0075042	1..466	1.42	2.07	4.19	0.03	NaN	1	2.44	2.96	7.8	0.000984	0.00788	1		PREDICTED: CD276 antigen-like isoform X3 [Salmo salar]
contig_0077420	contig_0077420	1..533	1.24	2.07	4.19	0.03	NaN	1	1.54	2.5	5.64	0.00684	0.04	1		PREDICTED: ral GTPase-activating protein subunit alpha-2-like isoform X3 [Salmo salar]
contig_0113096	contig_0113096	1..1449	0.46	2.07	4.19	0.03	NaN	1	0.52	2.38	5.21	0.01	0.05	1		PREDICTED: carboxypeptidase Q-like isoform X1 [Salmo salar]
contig_0036976	contig_0036976	1..392	2.2	2.04	4.12	0.01	0.1	1	2.9	2.56	5.91	0.00145	0.01	1		PREDICTED: complement C1r subcomponent-like [Salmo salar]
contig_0053854	contig_0053854	1..714	1.21	2.04	4.12	0.01	0.1	1	2.3	3.09	8.52	7.86e-05	0.000971	1		PREDICTED: uncharacterized protein LOC106592045, partial [Salmo salar]
contig_0100429	contig_0100429	1..324	2.66	2.04	4.12	0.01	0.1	1	3.11	2.39	5.26	0.00325	0.02	1		PREDICTED: collagen alpha-1(XXVIII) chain-like [Salmo salar]
contig_0138387	contig_0138387	1..1178	0.73	2.04	4.12	0.01	0.1	1	1.07	2.71	6.56	0.000668	0.00573	1		PREDICTED: nesprin-2-like isoform X8 [Salmo salar]
contig_0017065	contig_0017065	1..406	2.61	2.03	4.08	0.0069	0.06	1	3.11	2.4	5.29	0.00106	0.00839	1		PREDICTED: SHC SH2 domain-binding protein 1-like [Salmo salar]
contig_0090364	contig_0090364	1..1666	2.75	1.96	3.89	4.22e-07	2.3e-05	0.11	6.62	3.35	10.22	4.47e-23	1.35e-20	1.19e-17		PREDICTED: achaete-scute homolog 1b-like [Salmo salar]
contig_0020095	contig_0020095	1..450	3.54	1.95	3.86	0.00141	0.02	1	5.04	2.58	5.99	1.04e-05	0.000174	1		not available
contig_0027405	contig_0027405	1..949	1.89	1.95	3.86	0.00075	0.01	1	3.06	2.77	6.81	4.9e-07	1.19e-05	0.13		not available
contig_0045273	contig_0045273	1..337	24.61	1.95	3.86	3.99e-12	5.27e-10	1.08e-06	23.39	2	4.01	1.05e-12	8.2e-11	2.8e-07		PREDICTED: tenascin isoform X2 [Salmo salar]
contig_0113757	contig_0113757	1..916	1.96	1.95	3.86	0.00075	0.01	1	2.07	2.15	4.45	0.000165	0.00182	1		COL11A2, partial [Salmo salar]
contig_0028751	contig_0028751	1..836	1.19	1.94	3.83	0.01	0.08	1	1.43	2.33	5.02	0.00159	0.01	1		PREDICTED: uncharacterized protein LOC106609042 [Salmo salar]
contig_0115140	contig_0115140	1..450	1.77	1.93	3.81	0.02	0.13	1	2.38	2.48	5.59	0.00216	0.01	1		PREDICTED: transmembrane and coiled-coil domains protein 1 isoform X2 [Salmo salar]
contig_0010376	contig_0010376	1..2098	0.28	1.92	3.78	0.05	NaN	1	0.42	2.6	6.07	0.00454	0.03	1		PREDICTED: RNA-binding protein 38-like [Salmo salar]
contig_0033451	contig_0033451	1..213	2.8	1.92	3.78	0.05	NaN	1	3.55	2.38	5.21	0.01	0.05	1		PREDICTED: CDK2-associated and cullin domain-containing protein 1-like [Salmo salar]
contig_0047522	contig_0047522	1..417	1.43	1.92	3.78	0.05	NaN	1	1.81	2.38	5.21	0.01	0.05	1		PREDICTED: protein angel homolog 2 isoform X3 [Salmo salar]
contig_0102627	contig_0102627	1..422	1.41	1.92	3.78	0.05	NaN	1	1.94	2.5	5.64	0.00684	0.04	1		PREDICTED: protein sidekick-2-like [Salmo salar]
contig_0116989	contig_0116989	1..602	0.99	1.92	3.78	0.05	NaN	1	1.78	2.88	7.37	0.00142	0.01	1		not available
contig_0119211	contig_0119211	1..296	2.02	1.92	3.78	0.05	NaN	1	2.56	2.38	5.21	0.01	0.05	1		Snurportin-1 [Salmo salar]
contig_0133937	contig_0133937	1..1337	2.73	1.91	3.75	5.66e-06	0.000222	1	3.44	2.37	5.16	7.08e-09	2.66e-07	0.00189		PREDICTED: kinesin heavy chain isoform 5C-like [Salmo salar]
contig_0038409	contig_0038409	1..219	8.78	1.9	3.74	0.000593	0.01	1	8.93	2.05	4.14	0.000191	0.00205	1		not available
contig_0024185	contig_0024185	1..2238	1.96	1.89	3.72	1.11e-06	5.37e-05	0.3	2.62	2.44	5.43	5.32e-12	3.67e-10	1.42e-06		PREDICTED: zinc-binding protein A33-like [Salmo salar]
contig_0042431	contig_0042431	1..661	0.6	1.89	3.72	0.1	NaN	1	1.24	3.05	8.29	0.00467	0.03	1		PREDICTED: mitochondrial sodium/hydrogen exchanger 9B2-like [Salmo salar]
contig_0047947	contig_0047947	1..512	0.78	1.89	3.72	0.1	NaN	1	1.35	2.81	7.02	0.00999	0.05	1		PREDICTED: ribosomal RNA processing protein 1 homolog B-like isoform X3 [Salmo salar]
contig_0073459	contig_0073459	1..443	0.9	1.89	3.72	0.1	NaN	1	1.57	2.81	7.02	0.00999	0.05	1		PREDICTED: zinc finger protein 271-like [Salmo salar]
contig_0080466	contig_0080466	1..544	0.73	1.89	3.72	0.1	NaN	1	1.74	3.26	9.55	0.00232	0.02	1		Glutathione S-transferase C-terminal domain-containing protein [Salmo salar]
contig_0100321	contig_0100321	1..2001	0.2	1.89	3.72	0.1	NaN	1	0.47	3.26	9.55	0.00232	0.02	1		PREDICTED: G-protein coupled receptor 182-like [Salmo salar]
contig_0001303	contig_0001303	1..2378	172.29	1.89	3.71	2.14e-56	4.23e-53	5.83e-51	183.26	2.11	4.31	1.25e-69	2.67e-66	3.32e-64		PREDICTED: keratin, type I cytoskeletal 13-like [Salmo salar]
contig_0018684	contig_0018684	1..776	4.1	1.87	3.65	2.25e-05	0.00073	1	4.55	2.14	4.42	7.85e-07	1.81e-05	0.21		not available
contig_0067419	contig_0067419	1..973	4.02	1.86	3.64	4.05e-06	0.000166	1	4.41	2.12	4.35	1.04e-07	2.95e-06	0.03		not available
contig_0034829	contig_0034829	1..299	6.21	1.85	3.61	0.000869	0.01	1	7.38	2.23	4.68	4.12e-05	0.000562	1		PREDICTED: lipid phosphate phosphatase-related protein type 4-like isoform X4 [Salmo salar]
contig_0001528	contig_0001528	1..3393	132.3	1.85	3.6	2.52e-54	4.65e-51	6.86e-49	260.24	2.95	7.72	5.23e-137	1.15e-132	1.39e-131		PREDICTED: eosinophil peroxidase-like [Salmo salar]
contig_0083368	contig_0083368	1..558	1.66	1.84	3.57	0.02	0.11	1	1.92	2.17	4.5	0.00365	0.02	1		PREDICTED: TFIIH basal transcription factor complex helicase XPB subunit [Salmo salar]
contig_0106033	contig_0106033	1..1229	0.76	1.84	3.57	0.02	0.11	1	0.87	2.17	4.5	0.00365	0.02	1		ORF2 protein [Salmo salar]
contig_0085154	contig_0085154	1..1032	0.19	1.83	3.56	0.25	NaN	1	0.73	3.85	14.39	0.00698	0.04	1		PREDICTED: ubiquitin-conjugating enzyme E2 J2-like isoform X4 [Salmo salar]
contig_0225984	contig_0225984	1..204	0.98	1.83	3.56	0.25	NaN	1	3.71	3.85	14.39	0.00698	0.04	1		PREDICTED: uncharacterized protein LOC106591180 isoform X1 [Salmo salar]
contig_0023078	contig_0023078	1..806	0.91	1.81	3.49	0.03	NaN	1	1.1	2.2	4.61	0.00756	0.04	1		Syntaxin-binding protein 3, partial [Salmo salar]
contig_0097050	contig_0097050	1..1180	0.62	1.81	3.49	0.03	NaN	1	0.86	2.39	5.26	0.00325	0.02	1		not available
contig_0102289	contig_0102289	1..448	1.63	1.81	3.49	0.03	NaN	1	2.82	2.71	6.56	0.000668	0.00573	1		PREDICTED: protein FAM35A isoform X2 [Salmo salar]
contig_0051769	contig_0051769	1..1033	2.57	1.79	3.45	0.000136	0.00323	1	2.93	2.1	4.29	4.7e-06	8.71e-05	1		PREDICTED: thiosulfate sulfurtransferase/rhodanese-like domain-containing protein 1 [Salmo salar]
contig_0004828	contig_0004828	1..2085	1.69	1.78	3.43	1.82e-05	0.000608	1	3.78	3.07	8.39	4.02e-17	5.96e-15	1.07e-11		PREDICTED: cis-aconitate decarboxylase-like [Salmo salar]
contig_0091024	contig_0091024	1..1576	1.01	1.78	3.43	0.0024	0.03	1	1.32	2.29	4.89	5.22e-05	0.000688	1		PREDICTED: cytochrome c-type heme lyase-like isoform X3 [Salmo salar]
contig_0108979	contig_0108979	1..1497	0.71	1.77	3.42	0.01	0.09	1	1.01	2.41	5.3	0.000361	0.00349	1		PREDICTED: helicase with zinc finger domain 2 isoform X1 [Salmo salar]
contig_0052791	contig_0052791	1..444	7.47	1.77	3.41	3.08e-05	0.000946	1	10.37	2.37	5.16	7.08e-09	2.66e-07	0.00189		not available
contig_0003873	contig_0003873	1..536	0.99	1.75	3.36	0.07	NaN	1	1.41	2.38	5.21	0.01	0.05	1		PREDICTED: calphotin-like isoform X2 [Salmo salar]
contig_0074938	contig_0074938	1..322	61.19	1.75	3.36	3.35e-19	9.38e-17	9.11e-14	112.99	2.76	6.77	1.29e-49	1.65e-46	3.45e-44		not available
contig_0082931	contig_0082931	1..1103	0.48	1.75	3.36	0.07	NaN	1	0.8	2.6	6.07	0.00454	0.03	1		PREDICTED: oxysterol-binding protein-related protein 10 isoform X2 [Salmo salar]
contig_0093161	contig_0093161	1..1494	0.36	1.75	3.36	0.07	NaN	1	0.59	2.6	6.07	0.00454	0.03	1		PREDICTED: CD276 antigen-like [Salmo salar]
contig_0112956	contig_0112956	1..1500	1.37	1.74	3.34	0.000791	0.01	1	2.4	2.67	6.35	4.52e-08	1.4e-06	0.01		not available
contig_0074270	contig_0074270	1..370	2.33	1.73	3.32	0.02	0.14	1	2.73	2.08	4.23	0.00557	0.03	1		PREDICTED: U6 snRNA-associated Sm-like protein LSm8 [Salmo salar]
contig_0041346	contig_0041346	1..507	3.01	1.72	3.29	0.00356	0.04	1	6.47	2.94	7.7	6.76e-08	2.01e-06	0.02		PREDICTED: uncharacterized protein LOC106595882 [Salmo salar]
contig_0051729	contig_0051729	1..1034	1.92	1.69	3.23	0.00115	0.02	1	2.5	2.19	4.57	1.25e-05	0.000203	1		PREDICTED: UDP-N-acetylglucosamine transporter-like isoform X3 [Salmo salar]
contig_0098852	contig_0098852	1..1037	4.09	1.67	3.19	8.8e-06	0.000325	1	4.86	2.05	4.14	2.61e-08	8.6e-07	0.00696		PREDICTED: complement C1q-like protein 2 [Salmo salar]
contig_0021475	contig_0021475	1..479	1.38	1.67	3.18	0.05	NaN	1	1.84	2.2	4.61	0.00756	0.04	1		Gastrula zinc finger protein XlCGF49.1 [Salmo salar]
contig_0074984	contig_0074984	1..1252	0.53	1.67	3.18	0.05	NaN	1	0.71	2.2	4.61	0.00756	0.04	1		Complement C1q subcomponent subunit C precursor [Salmo salar]
contig_0084505	contig_0084505	1..623	1.06	1.67	3.18	0.05	NaN	1	1.72	2.48	5.59	0.00216	0.01	1		PREDICTED: E3 ubiquitin-protein ligase TRIM21-like [Salmo salar]
contig_0085033	contig_0085033	1..529	1.25	1.67	3.18	0.05	NaN	1	1.67	2.2	4.61	0.00756	0.04	1		PREDICTED: tectonin beta-propeller repeat-containing protein 1-like [Salmo salar]
contig_0099334	contig_0099334	1..674	0.98	1.67	3.18	0.05	NaN	1	1.5	2.39	5.26	0.00325	0.02	1		PREDICTED: fibroblast growth factor receptor 1-A-like isoform X9 [Salmo salar]
contig_0117568	contig_0117568	1..1136	0.58	1.67	3.18	0.05	NaN	1	0.83	2.3	4.93	0.00494	0.03	1		PREDICTED: uncharacterized protein LOC106604427 [Salmo salar]
contig_0040751	contig_0040751	1..634	2.83	1.66	3.17	0.00213	0.03	1	3.98	2.28	4.86	1.07e-05	0.000178	1		PREDICTED: gap junction gamma-1 protein-like [Salmo salar]
contig_0058976	contig_0058976	1..676	2.65	1.66	3.17	0.00213	0.03	1	3.08	2	4.01	0.00015	0.00168	1		PREDICTED: carbonic anhydrase 7 [Salmo salar]
contig_0112950	contig_0112950	1..354	5.06	1.66	3.17	0.00213	0.03	1	6.06	2.05	4.13	0.000102	0.00122	1		PREDICTED: diacylglycerol O-acyltransferase 1-like isoform X2 [Salmo salar]
contig_0001073	contig_0001073	1..1857	383.84	1.66	3.16	9.26e-46	1.24e-42	2.52e-40	488.46	2.13	4.39	1.23e-74	3.28e-71	3.28e-69		PREDICTED: annexin A1-like [Salmo salar]
contig_0021727	contig_0021727	1..296	1.12	1.64	3.11	0.17	NaN	1	2.98	3.16	8.92	0.00327	0.02	1		not available
contig_0139867	contig_0139867	1..1110	0.3	1.64	3.11	0.17	NaN	1	0.8	3.16	8.92	0.00327	0.02	1		PREDICTED: furin-1-like [Salmo salar]
contig_0259533	contig_0259533	1..1512	0.22	1.64	3.11	0.17	NaN	1	0.5	2.94	7.66	0.00678	0.04	1		not available
contig_0299329	contig_0299329	1..276	1.2	1.64	3.11	0.17	NaN	1	2.97	3.05	8.29	0.00467	0.03	1		PREDICTED: myosin-11-like, partial [Salmo salar]
contig_0143090	contig_0143090	1..383	4.16	1.63	3.1	0.00404	0.04	1	5.43	2.14	4.41	8.83e-05	0.00107	1		PREDICTED: ubiquitin carboxyl-terminal hydrolase 34-like isoform X5 [Salmo salar]
contig_0099086	contig_0099086	1..313	6.57	1.62	3.08	0.00131	0.02	1	9.47	2.28	4.84	2.37e-06	4.76e-05	0.63		PREDICTED: unconventional myosin-IXb-like isoform X5 [Salmo salar]
contig_0067631	contig_0067631	1..321	2.48	1.62	3.07	0.04	0.18	1	3.34	2.17	4.5	0.00365	0.02	1		not available
contig_0072255	contig_0072255	1..428	4.03	1.61	3.05	0.00312	0.04	1	5.45	2.17	4.5	3.28e-05	0.000463	1		PREDICTED: cholesterol 25-hydroxylase-like protein [Salmo salar]
contig_0117230	contig_0117230	1..338	11.97	1.61	3.04	2.26e-05	0.000731	1	14.74	2.03	4.09	3.6e-08	1.14e-06	0.00958		not available
contig_0123108	contig_0123108	1..533	4.36	1.59	3.02	0.000813	0.01	1	6.03	2.19	4.56	1.61e-06	3.41e-05	0.43		PREDICTED: gap junction Cx32.2 protein-like [Salmo salar]
contig_0106205	contig_0106205	1..703	4.81	1.59	3.01	9.13e-05	0.00234	1	10.23	2.8	6.96	2.63e-15	3.08e-13	7.01e-10		PREDICTED: cell surface glycoprotein 1-like [Salmo salar]
contig_0003060	contig_0003060	1..8110	40.78	1.58	2.99	1.09e-39	1.12e-36	2.97e-34	96.54	2.95	7.73	7.09e-136	1.25e-131	1.89e-130		PREDICTED: CUB and zona pellucida-like domain-containing protein 1 [Salmo salar]
contig_0079787	contig_0079787	1..1093	0.85	1.58	2.99	0.03	0.15	1	1.1	2.07	4.2	0.00273	0.02	1		not available
contig_0059209	contig_0059209	1..848	4.85	1.57	2.98	2.58e-05	0.000815	1	7.06	2.24	4.73	1.92e-11	1.21e-09	5.12e-06		PREDICTED: receptor tyrosine-protein kinase erbB-3-like isoform X3 [Salmo salar]
contig_0018196	contig_0018196	1..559	10.56	1.57	2.96	1.62e-07	9.79e-06	0.04	13.31	2.03	4.07	2.58e-12	1.9e-10	6.86e-07		PREDICTED: butyrophilin subfamily 1 member A1-like [Salmo salar]
contig_0023778	contig_0023778	1..220	2.11	1.56	2.95	0.12	NaN	1	4.87	2.88	7.37	0.00142	0.01	1		PREDICTED: fizzy-related protein homolog [Salmo salar]
contig_0025546	contig_0025546	1..210	2.21	1.56	2.95	0.12	NaN	1	3.9	2.5	5.64	0.00684	0.04	1		PREDICTED: UPF0489 protein C5orf22 homolog [Salmo salar]
contig_0046418	contig_0046418	1..290	1.6	1.56	2.95	0.12	NaN	1	2.61	2.38	5.21	0.01	0.05	1		PREDICTED: AP-1 complex subunit sigma-1A-like isoform X1 [Salmo salar]
contig_0051670	contig_0051670	1..360	1.29	1.56	2.95	0.12	NaN	1	2.1	2.38	5.21	0.01	0.05	1		p8 MTCP-1 [Salmo salar]
contig_0062943	contig_0062943	1..358	1.3	1.56	2.95	0.12	NaN	1	2.29	2.5	5.64	0.00684	0.04	1		PREDICTED: CTTNBP2 N-terminal-like protein isoform X1 [Salmo salar]
contig_0072839	contig_0072839	1..722	0.64	1.56	2.95	0.12	NaN	1	1.22	2.6	6.07	0.00454	0.03	1		PREDICTED: piggyBac transposable element-derived protein 4-like isoform X1 [Salmo salar]
contig_0073890	contig_0073890	1..497	0.93	1.56	2.95	0.12	NaN	1	1.65	2.5	5.64	0.00684	0.04	1		Transposable element Tc1 transposase [Salmo salar]
contig_0086103	contig_0086103	1..357	1.3	1.56	2.95	0.12	NaN	1	2.47	2.6	6.07	0.00454	0.03	1		not available
contig_0114164	contig_0114164	1..1053	0.44	1.56	2.95	0.12	NaN	1	0.96	2.79	6.94	0.00207	0.01	1		not available
contig_0127071	contig_0127071	1..1979	0.23	1.56	2.95	0.12	NaN	1	0.45	2.6	6.07	0.00454	0.03	1		PREDICTED: macrophage-capping protein-like isoform X1 [Salmo salar]
contig_0188792	contig_0188792	1..747	0.62	1.56	2.95	0.12	NaN	1	1.01	2.38	5.21	0.01	0.05	1		not available
contig_0320309	contig_0320309	1..231	2.01	1.56	2.95	0.12	NaN	1	3.82	2.6	6.07	0.00454	0.03	1		zgc:113149-like [Salmo salar]
contig_0077742	contig_0077742	1..482	2.2	1.55	2.94	0.02	0.12	1	3.14	2.19	4.56	0.000608	0.00531	1		not available
contig_0094429	contig_0094429	1..266	3.99	1.55	2.94	0.02	0.12	1	6.16	2.3	4.94	0.000275	0.00278	1		not available
contig_0026931	contig_0026931	1..734	10.39	1.55	2.93	7.1e-09	5.56e-07	0.00193	13.23	2.02	4.07	5.82e-15	6.45e-13	1.55e-09		PREDICTED: N-acetylmuramoyl-L-alanine amidase-like [Salmo salar]
contig_0042433	contig_0042433	1..3683	3.37	1.55	2.93	2.68e-12	3.62e-10	7.29e-07	5.94	2.49	5.64	1.39e-32	9.11e-30	3.69e-27		PREDICTED: volume-regulated anion channel subunit LRRC8C-like [Salmo salar]
contig_0099907	contig_0099907	1..1307	1.27	1.55	2.93	0.00455	0.05	1	3.09	2.96	7.77	3.12e-09	1.26e-07	0.000831		PREDICTED: dynactin subunit 1-like isoform X6 [Salmo salar]
contig_0110480	contig_0110480	1..1287	2.32	1.54	2.92	0.000267	0.00554	1	3.09	2.08	4.23	3.33e-07	8.43e-06	0.09		Histone H1 [Salmo salar]
contig_0004193	contig_0004193	1..1042	1.15	1.53	2.9	0.02	0.1	1	1.69	2.22	4.66	0.000212	0.00224	1		PREDICTED: uncharacterized protein LOC106611174 [Salmo salar]
contig_0032026	contig_0032026	1..1175	49.63	1.53	2.9	1.3e-26	5.86e-24	3.53e-21	83.72	2.41	5.33	1.39e-66	2.71e-63	3.69e-61		PREDICTED: V-set domain containing T-cell activation inhibitor 1-like isoform X1 [Salmo salar]
contig_0039813	contig_0039813	1..1524	0.78	1.53	2.9	0.02	0.1	1	1.2	2.27	4.83	0.000144	0.00162	1		PREDICTED: 2-epi-5-epi-valiolone synthase-like [Salmo salar]
contig_0117020	contig_0117020	1..2090	0.57	1.53	2.9	0.02	0.1	1	0.84	2.22	4.66	0.000212	0.00224	1		PREDICTED: kelch repeat and BTB domain-containing protein 8 isoform X2 [Salmo salar]
contig_0129657	contig_0129657	1..419	2.85	1.53	2.9	0.02	0.1	1	3.61	2	4	0.00104	0.00825	1		thiamine triphosphatase-like [Salmo salar]
contig_0137364	contig_0137364	1..288	13.36	1.53	2.89	5.79e-05	0.0016	1	30.21	2.83	7.13	5.81e-18	9.53e-16	1.55e-12		not available
contig_0151222	contig_0151222	1..504	1.18	1.52	2.87	0.08	NaN	1	2.5	2.71	6.56	0.000668	0.00573	1		PREDICTED: uncharacterized protein LOC106596055 isoform X2 [Salmo salar]
contig_0021102	contig_0021102	1..2189	0.61	1.52	2.86	0.01	0.09	1	0.81	2.05	4.15	0.000361	0.00349	1		PREDICTED: glycerophosphodiester phosphodiesterase 1-like [Salmo salar]
contig_0011534	contig_0011534	1..6066	3.57	1.51	2.85	1.41e-16	3.06e-14	3.83e-11	4.83	2.07	4.21	1.36e-31	8.12e-29	3.61e-26		PREDICTED: uncharacterized protein LOC106606833 [Salmo salar]
contig_0000991	contig_0000991	1..639	642.61	1.51	2.84	6.89e-37	6.08e-34	1.87e-31	935.78	2.17	4.51	1.54e-75	4.38e-72	4.11e-70		Glutathione S-transferase P [Salmo salar]
contig_0273826	contig_0273826	1..349	4.18	1.51	2.84	0.00871	0.07	1	5.6	2.05	4.14	0.000191	0.00205	1		PREDICTED: claudin-3-like [Salmo salar]
contig_0106364	contig_0106364	1..1242	2.56	1.5	2.83	0.000243	0.00515	1	4.26	2.36	5.13	9.51e-10	4.26e-08	0.000253		not available
contig_0000334	contig_0000334	1..2011	85.24	1.5	2.82	3.28e-33	2.37e-30	8.93e-28	112.25	2.02	4.06	7.91e-60	1.36e-56	2.11e-54		Collagenase 3 precursor [Salmo salar]
contig_0036080	contig_0036080	1..216	3.38	1.49	2.81	0.06	0.23	1	4.96	2.17	4.5	0.00365	0.02	1		PREDICTED: uncharacterized protein LOC106593517 [Salmo salar]
contig_0099485	contig_0099485	1..201	3.63	1.49	2.81	0.06	0.23	1	5.33	2.17	4.5	0.00365	0.02	1		PREDICTED: T-cell leukemia homeobox protein 3-like isoform X4 [Salmo salar]
contig_0107701	contig_0107701	1..1037	0.7	1.49	2.81	0.06	0.23	1	1.22	2.4	5.29	0.00106	0.00839	1		not available
contig_0115144	contig_0115144	1..1487	0.49	1.49	2.81	0.06	0.23	1	0.68	2.08	4.23	0.00557	0.03	1		T cell receptor alpha, partial [Salmo salar]
contig_0135418	contig_0135418	1..504	1.45	1.49	2.81	0.06	0.23	1	5.25	3.47	11.07	6.28e-07	1.48e-05	0.17		PREDICTED: phytanoyl-CoA dioxygenase domain-containing protein 1-like [Salmo salar]
contig_0183298	contig_0183298	1..772	0.95	1.49	2.81	0.06	0.23	1	1.55	2.33	5.02	0.00159	0.01	1		not available
contig_0013740	contig_0013740	1..820	1.05	1.48	2.78	0.04	0.19	1	1.46	2.07	4.2	0.00273	0.02	1		not available
contig_0020524	contig_0020524	1..2610	6.43	1.47	2.77	8.66e-14	1.41e-11	2.36e-08	13.43	2.66	6.3	1e-46	1.17e-43	2.66e-41		PREDICTED: podocan-like [Salmo salar]
contig_0030486	contig_0030486	1..635	6.48	1.42	2.68	9.16e-05	0.00234	1	12.11	2.45	5.47	6.91e-15	7.56e-13	1.84e-09		PREDICTED: integrin beta-like protein A, partial [Salmo salar]
contig_0041021	contig_0041021	1..1279	6.28	1.41	2.67	3.17e-08	2.19e-06	0.00862	9.66	2.16	4.48	4.85e-19	9.14e-17	1.29e-13		insulin-like growth factor binding protein 6 paralog A2 [Salmo salar]
contig_0055614	contig_0055614	1..4766	3.51	1.4	2.64	6.39e-13	9.37e-11	1.74e-07	5.19	2.09	4.26	5.78e-29	2.96e-26	1.54e-23		PREDICTED: proline-rich transmembrane protein 3-like isoform X1 [Salmo salar]
contig_0001513	contig_0001513	1..1046	88.41	1.38	2.61	1.43e-25	6.2e-23	3.9e-20	152.64	2.3	4.91	4.2e-70	9.24e-67	1.12e-64		PREDICTED: uncharacterized protein LOC106612508 [Salmo salar]
contig_0047634	contig_0047634	1..916	1.3	1.37	2.58	0.03	0.14	1	2	2.1	4.3	0.000244	0.00251	1		PREDICTED: ribonuclease P protein subunit p38-like [Salmo salar]
contig_0079250	contig_0079250	1..313	3.81	1.37	2.58	0.03	0.14	1	7.66	2.49	5.63	8.14e-06	0.00014	1		PREDICTED: zinc finger protein 501-like [Salmo salar]
contig_0128286	contig_0128286	1..639	1.66	1.37	2.58	0.03	0.17	1	3.45	2.54	5.83	1.5e-05	0.000237	1		not available
contig_0037944	contig_0037944	1..2570	2.25	1.36	2.57	2.66e-06	0.000116	0.72	3.39	2.08	4.22	3.52e-14	3.43e-12	9.37e-09		PREDICTED: cholesteryl ester transfer protein-like [Salmo salar]
contig_0043240	contig_0043240	1..306	2.6	1.36	2.57	0.06	0.25	1	4.74	2.35	5.08	0.000536	0.00479	1		not available
contig_0087909	contig_0087909	1..245	3.79	1.36	2.57	0.05	0.2	1	10.04	2.89	7.4	2.4e-06	4.82e-05	0.64		PREDICTED: proline-rich receptor-like protein kinase PERK12 [Salmo salar]
contig_0088190	contig_0088190	1..280	3.32	1.36	2.57	0.05	0.2	1	5.86	2.3	4.94	0.000275	0.00278	1		PREDICTED: growth arrest and DNA damage-inducible proteins-interacting protein 1-like [Salmo salar]
contig_0003758	contig_0003758	1..251	2.64	1.36	2.56	0.09	NaN	1	4.52	2.25	4.76	0.0024	0.02	1		PREDICTED: AT-rich interactive domain-containing protein 5A-like isoform X1 [Salmo salar]
contig_0013128	contig_0013128	1..1678	0.4	1.36	2.56	0.09	NaN	1	0.75	2.4	5.29	0.00106	0.00839	1		vacuolar protein sorting-associated protein 52-like protein [Salmo salar]
contig_0041282	contig_0041282	1..1212	0.55	1.36	2.56	0.09	NaN	1	1.3	2.72	6.6	0.000155	0.00173	1		PREDICTED: transmembrane and TPR repeat-containing protein 1-like isoform X2 [Salmo salar]
contig_0100857	contig_0100857	1..459	1.45	1.36	2.56	0.09	NaN	1	2.34	2.17	4.5	0.00365	0.02	1		not available
contig_0139324	contig_0139324	1..460	1.44	1.36	2.56	0.09	NaN	1	3.56	2.78	6.86	0.000108	0.00127	1		not available
contig_0142327	contig_0142327	1..1112	0.6	1.36	2.56	0.09	NaN	1	0.91	2.08	4.23	0.00557	0.03	1		PREDICTED: transcription factor Sp9-like [Salmo salar]
contig_0161419	contig_0161419	1..683	0.97	1.36	2.56	0.09	NaN	1	3.14	3.16	8.97	7.04e-06	0.000123	1		PREDICTED: steryl-sulfatase [Salmo salar]
contig_0199329	contig_0199329	1..239	2.78	1.36	2.56	0.09	NaN	1	4.22	2.08	4.23	0.00557	0.03	1		PREDICTED: uncharacterized protein LOC106585283 isoform X2 [Salmo salar]
contig_0029132	contig_0029132	1..1027	0.52	1.35	2.55	0.13	NaN	1	0.98	2.39	5.26	0.00325	0.02	1		not available
contig_0077488	contig_0077488	1..657	5.15	1.35	2.55	0.000506	0.00918	1	2.09	-2.23	-4.71	0.00439	0.03	1		PREDICTED: uncharacterized protein LOC106605687 [Salmo salar]
contig_0104294	contig_0104294	1..272	1.95	1.35	2.55	0.13	NaN	1	4.64	2.71	6.56	0.000668	0.00573	1		PREDICTED: uncharacterized protein LOC106609568 isoform X1 [Salmo salar]
contig_0104341	contig_0104341	1..418	1.27	1.35	2.55	0.13	NaN	1	2.26	2.3	4.93	0.00494	0.03	1		not available
contig_0127300	contig_0127300	1..340	1.56	1.35	2.55	0.13	NaN	1	3.15	2.48	5.59	0.00216	0.01	1		PREDICTED: egl nine homolog 3 [Salmo salar]
contig_0154673	contig_0154673	1..423	1.25	1.35	2.55	0.13	NaN	1	2.09	2.2	4.61	0.00756	0.04	1		PREDICTED: transmembrane protein 121-like [Salmo salar]
contig_0025557	contig_0025557	1..1438	4.94	1.34	2.53	4.38e-07	2.38e-05	0.12	7.37	2.04	4.12	4.56e-16	5.89e-14	1.21e-10		hypothetical protein [Salmo salar]
contig_0037791	contig_0037791	1..478	0.83	1.34	2.53	0.19	NaN	1	2.64	3.11	8.66	0.000487	0.00444	1		hypothetical protein, partial [Salmo salar]
contig_0048582	contig_0048582	1..447	0.89	1.34	2.53	0.19	NaN	1	2.26	2.79	6.94	0.00207	0.01	1		PREDICTED: angiopoietin-related protein 1-like [Salmo salar]
contig_0059995	contig_0059995	1..596	0.67	1.34	2.53	0.19	NaN	1	1.27	2.38	5.21	0.01	0.05	1		Leucine-rich repeat-containing protein 40 [Salmo salar]
contig_0136114	contig_0136114	1..652	0.61	1.34	2.53	0.19	NaN	1	1.55	2.79	6.94	0.00207	0.01	1		not available
contig_0137487	contig_0137487	1..566	0.7	1.34	2.53	0.19	NaN	1	1.67	2.7	6.51	0.00305	0.02	1		PREDICTED: trifunctional nucleotide phosphoesterase protein YfkN-like isoform X5 [Salmo salar]
contig_0140161	contig_0140161	1..399	1	1.34	2.53	0.19	NaN	1	1.9	2.38	5.21	0.01	0.05	1		PREDICTED: ephrin type-A receptor 8-like isoform X2 [Salmo salar]
contig_0142406	contig_0142406	1..445	0.89	1.34	2.53	0.19	NaN	1	1.7	2.38	5.21	0.01	0.05	1		not available
contig_0155230	contig_0155230	1..350	1.14	1.34	2.53	0.19	NaN	1	2.52	2.6	6.07	0.00454	0.03	1		PREDICTED: histone-lysine N-methyltransferase 2C-like isoform X7 [Salmo salar]
contig_0184339	contig_0184339	1..445	0.89	1.34	2.53	0.19	NaN	1	1.84	2.5	5.64	0.00684	0.04	1		PREDICTED: WD repeat-containing protein 6 [Salmo salar]
contig_0227439	contig_0227439	1..1146	0.35	1.34	2.53	0.19	NaN	1	1.49	3.54	11.67	5.38e-05	0.000705	1		leptin [Salmo salar]
contig_0276752	contig_0276752	1..732	0.54	1.34	2.53	0.19	NaN	1	1.29	2.7	6.51	0.00305	0.02	1		not available
contig_0004719	contig_0004719	1..2001	3.85	1.33	2.51	2.07e-07	1.21e-05	0.06	6.65	2.24	4.74	7.86e-21	1.85e-18	2.09e-15		PREDICTED: ribonuclease-like 3, partial [Salmo salar]
contig_0018592	contig_0018592	1..290	0.91	1.32	2.5	0.28	NaN	1	2.61	2.94	7.66	0.00678	0.04	1		PREDICTED: LOW QUALITY PROTEIN: ankyrin repeat and LEM domain-containing protein 2-like [Salmo salar]
contig_0045498	contig_0045498	1..435	0.61	1.32	2.5	0.28	NaN	1	1.59	2.81	7.02	0.00999	0.05	1		PREDICTED: ubiquitin carboxyl-terminal hydrolase 25-like isoform X8 [Salmo salar]
contig_0059775	contig_0059775	1..383	0.69	1.32	2.5	0.28	NaN	1	1.81	2.81	7.02	0.00999	0.05	1		PREDICTED: apolipoprotein B-100-like [Salmo salar]
contig_0069866	contig_0069866	1..461	0.58	1.32	2.5	0.28	NaN	1	1.64	2.94	7.66	0.00678	0.04	1		not available
contig_0083892	contig_0083892	1..276	0.96	1.32	2.5	0.28	NaN	1	3.2	3.16	8.92	0.00327	0.02	1		PREDICTED: NADPH oxidase organizer 1-like [Salmo salar]
contig_0092302	contig_0092302	1..204	1.3	1.32	2.5	0.28	NaN	1	3.71	2.94	7.66	0.00678	0.04	1		PREDICTED: cone cGMP-specific 3',5'-cyclic phosphodiesterase subunit alpha'-like [Salmo salar]
contig_0125247	contig_0125247	1..439	0.6	1.32	2.5	0.28	NaN	1	1.87	3.05	8.29	0.00467	0.03	1		not available
contig_0065803	contig_0065803	1..1069	3.29	1.3	2.46	0.000606	0.01	1	8.38	2.77	6.82	3.74e-18	6.33e-16	9.94e-13		PREDICTED: flocculation protein FLO11-like isoform X3 [Salmo salar]
contig_0113169	contig_0113169	1..443	2.55	1.29	2.44	0.04	0.18	1	4.13	2.1	4.3	0.000244	0.00251	1		not available
contig_0047850	contig_0047850	1..403	2.47	1.27	2.42	0.05	0.21	1	4.85	2.37	5.16	6.67e-05	0.000847	1		PREDICTED: acyl-CoA-binding domain-containing protein 6-like isoform X3 [Salmo salar]
contig_0073333	contig_0073333	1..229	4.35	1.27	2.42	0.05	0.21	1	6.88	2.06	4.17	0.000696	0.00592	1		PREDICTED: tyrosine-protein kinase Fes/Fps-like isoform X3 [Salmo salar]
contig_0084207	contig_0084207	1..440	6.18	1.27	2.42	0.0023	0.03	1	9.6	2.03	4.09	2.41e-07	6.29e-06	0.06		not available
contig_0105430	contig_0105430	1..374	2.66	1.27	2.42	0.05	0.21	1	4.22	2.06	4.17	0.000696	0.00592	1		not available
contig_0050946	contig_0050946	1..1258	2.06	1.27	2.41	0.00292	0.03	1	4.56	2.54	5.82	4.15e-12	2.93e-10	1.1e-06		not available
contig_0110897	contig_0110897	1..428	0.31	1.27	2.41	0.45	NaN	1	1.92	3.96	15.58	0.00532	0.03	1		PREDICTED: podocan-like [Salmo salar]
contig_0123638	contig_0123638	1..268	0.5	1.27	2.41	0.45	NaN	1	2.82	3.85	14.39	0.00698	0.04	1		PREDICTED: centrosomal protein of 170 kDa protein B-like isoform X6 [Salmo salar]
contig_0126221	contig_0126221	1..259	0.51	1.27	2.41	0.45	NaN	1	5.84	4.84	28.65	0.000525	0.00472	1		PREDICTED: uncharacterized protein LOC106570272, partial [Salmo salar]
contig_0182662	contig_0182662	1..357	0.37	1.27	2.41	0.45	NaN	1	2.47	4.07	16.77	0.00411	0.02	1		PREDICTED: LETM1 domain-containing protein 1-like isoform X1 [Salmo salar]
contig_0074272	contig_0074272	1..210	4.11	1.26	2.39	0.07	0.25	1	7.21	2.19	4.56	0.000608	0.00531	1		PREDICTED: formin-like protein 1 [Salmo salar]
contig_0039286	contig_0039286	1..1382	1.06	1.25	2.37	0.02	0.13	1	1.69	2.05	4.13	5.56e-05	0.000726	1		PREDICTED: guanine nucleotide-binding protein G(i) subunit alpha-1-like [Salmo salar]
contig_0094711	contig_0094711	1..441	1.65	1.24	2.36	0.1	0.31	1	2.86	2.15	4.42	0.0018	0.01	1		PREDICTED: interleukin-2 receptor subunit beta-like isoform X1 [Salmo salar]
contig_0028801	contig_0028801	1..343	5.22	1.22	2.33	0.01	0.09	1	9.74	2.24	4.74	7.95e-07	1.83e-05	0.21		not available
contig_0065259	contig_0065259	1..1428	0.42	1.21	2.31	0.14	NaN	1	0.84	2.33	5.02	0.00159	0.01	1		PREDICTED: inverted formin-2-like [Salmo salar]
contig_0121986	contig_0121986	1..809	0.74	1.21	2.31	0.14	NaN	1	1.56	2.4	5.29	0.00106	0.00839	1		PREDICTED: bromodomain-containing protein 1-like, partial [Salmo salar]
contig_0146642	contig_0146642	1..1065	0.56	1.21	2.31	0.14	NaN	1	0.95	2.08	4.23	0.00557	0.03	1		PREDICTED: protein patched homolog 1 [Salmo salar]
contig_0131962	contig_0131962	1..284	3.74	1.2	2.29	0.05	0.22	1	8.44	2.49	5.63	8.14e-06	0.00014	1		PREDICTED: RING finger protein 222 [Salmo salar]
contig_0004787	contig_0004787	1..332	2.8	1.17	2.26	0.07	0.27	1	5.51	2.27	4.83	0.000144	0.00162	1		PREDICTED: NACHT, LRR and PYD domains-containing protein 1-like [Salmo salar]
contig_0104449	contig_0104449	1..433	2.14	1.17	2.26	0.07	0.27	1	3.5	2	4	0.00104	0.00825	1		PREDICTED: sterol regulatory element-binding protein cleavage-activating protein-like isoform X3 [Salmo salar]
contig_0045761	contig_0045761	1..870	16.24	1.17	2.25	4.04e-09	3.29e-07	0.0011	53.2	3.01	8.05	4.62e-62	8.46e-59	1.23e-56		cathelicidin-derived antimicrobial peptide 1 isoform A [Salmo salar]
contig_0059788	contig_0059788	1..204	2.28	1.16	2.24	0.2	NaN	1	5.87	2.64	6.24	0.00098	0.00785	1		PREDICTED: AIDB protein isoform X1 [Salmo salar]
contig_0144799	contig_0144799	1..344	1.35	1.16	2.24	0.2	NaN	1	2.75	2.3	4.93	0.00494	0.03	1		not available
contig_0001491	contig_0001491	1..1209	356.05	1.15	2.21	2.34e-22	8.07e-20	6.38e-17	751.15	2.35	5.09	1.6e-89	9.36e-86	4.25e-84		PREDICTED: ES1 protein homolog, mitochondrial-like [Salmo salar]
contig_0102545	contig_0102545	1..696	1.14	1.14	2.21	0.1	0.32	1	2.36	2.3	4.94	0.000275	0.00278	1		PREDICTED: bifunctional coenzyme A synthase isoform X2 [Salmo salar]
contig_0059900	contig_0059900	1..2447	5.18	1.14	2.2	3.25e-08	2.24e-06	0.00885	2.44	-3.78	-13.71	5.86e-10	2.74e-08	0.000156		PREDICTED: band 4.1-like protein 3 isoform X2 [Salmo salar]
contig_0055927	contig_0055927	1..424	3.91	1.11	2.16	0.03	0.14	1	6.99	2.07	4.2	6.73e-06	0.000119	1		not available
contig_0065077	contig_0065077	1..382	1.74	1.1	2.14	0.15	0.39	1	4.29	2.52	5.74	0.000167	0.00183	1		not available
contig_0088984	contig_0088984	1..702	0.94	1.1	2.14	0.15	0.39	1	2.25	2.47	5.52	0.000245	0.00252	1		PREDICTED: interferon a3-like isoform X1 [Salmo salar]
contig_0133794	contig_0133794	1..363	1.83	1.1	2.14	0.15	0.39	1	5.73	2.86	7.28	1.31e-05	0.000211	1		PREDICTED: non-homologous end joining protein Ku-like isoform X1 [Salmo salar]
contig_0191194	contig_0191194	1..643	1.03	1.1	2.14	0.15	0.39	1	1.86	2.07	4.2	0.00273	0.02	1		PREDICTED: neuroglobin-like [Salmo salar]
contig_0058335	contig_0058335	1..984	0.34	1.08	2.12	0.3	NaN	1	0.83	2.5	5.64	0.00684	0.04	1		Transposable element Tcb1 transposase [Salmo salar]
contig_0058872	contig_0058872	1..2866	2.75	1.08	2.12	8e-06	0.0003	1	4.99	2.07	4.19	4e-20	8.49e-18	1.07e-14		PREDICTED: fibroblast growth factor 23-like [Salmo salar]
contig_0070843	contig_0070843	1..534	0.62	1.08	2.12	0.3	NaN	1	1.54	2.5	5.64	0.00684	0.04	1		not available
contig_0079766	contig_0079766	1..618	0.54	1.08	2.12	0.3	NaN	1	1.33	2.5	5.64	0.00684	0.04	1		PREDICTED: SNARE-associated protein Snapin-like isoform X2 [Salmo salar]
contig_0106181	contig_0106181	1..712	0.47	1.08	2.12	0.3	NaN	1	1.06	2.38	5.21	0.01	0.05	1		PREDICTED: calcium-dependent secretion activator 1 isoform X5 [Salmo salar]
contig_0132167	contig_0132167	1..555	0.6	1.08	2.12	0.3	NaN	1	1.36	2.38	5.21	0.01	0.05	1		PREDICTED: C-Jun-amino-terminal kinase-interacting protein 4-like isoform X6 [Salmo salar]
contig_0146571	contig_0146571	1..763	0.43	1.08	2.12	0.3	NaN	1	1.07	2.5	5.64	0.00684	0.04	1		not available
contig_0147964	contig_0147964	1..666	0.5	1.08	2.12	0.3	NaN	1	1.23	2.5	5.64	0.00684	0.04	1		PREDICTED: Fanconi anemia group I protein [Salmo salar]
contig_0174968	contig_0174968	1..350	0.95	1.08	2.12	0.3	NaN	1	2.34	2.5	5.64	0.00684	0.04	1		not available
contig_0179924	contig_0179924	1..2442	0.14	1.08	2.12	0.3	NaN	1	0.34	2.5	5.64	0.00684	0.04	1		PREDICTED: oxysterol-binding protein-related protein 7 isoform X2 [Salmo salar]
contig_0048834	contig_0048834	1..1696	5.4	1.08	2.11	2.54e-06	0.000111	0.69	2.65	-2.06	-4.17	2.56e-06	5.07e-05	0.68		PREDICTED: uncharacterized protein LOC106609103 isoform X4 [Salmo salar]
contig_0013018	contig_0013018	1..227	3.8	1.07	2.1	0.11	0.33	1	6.67	2	4	0.00104	0.00825	1		PREDICTED: solute carrier family 23 member 2-like isoform X2 [Salmo salar]
contig_0020087	contig_0020087	1..1405	0.61	1.07	2.1	0.11	0.33	1	1.35	2.32	5	9.78e-05	0.00117	1		PREDICTED: stress-induced-phosphoprotein 1-like [Salmo salar]
contig_0020152	contig_0020152	1..415	1.28	1.04	2.05	0.21	NaN	1	2.89	2.33	5.02	0.00159	0.01	1		UPF0527 membrane protein [Salmo salar]
contig_0125298	contig_0125298	1..251	2.11	1.04	2.05	0.21	NaN	1	4.52	2.25	4.76	0.0024	0.02	1		PREDICTED: protein piccolo-like [Salmo salar]
contig_0038363	contig_0038363	1..666	8.07	1.02	2.03	0.000282	0.00579	1	4.13	-2.92	-7.55	2.39e-05	0.000353	1		PREDICTED: ribonuclease-like 3, partial [Salmo salar]
contig_0084033	contig_0084033	1..520	3.57	1.01	2.02	0.03	0.16	1	11.64	2.84	7.15	2.09e-13	1.81e-11	5.55e-08		PREDICTED: phytanoyl-CoA dioxygenase domain-containing protein 1-like [Salmo salar]
contig_0033052	contig_0033052	1..395	15.79	1	2	0.000138	0.00325	1	32.09	2.15	4.44	2.8e-19	5.42e-17	7.46e-14		PREDICTED: SH3 domain-containing protein C23A1.17-like isoform X3 [Salmo salar]
contig_0050998	contig_0050998	1..915	1.52	0.96	1.94	0.07	0.25	1	2.89	2.01	4.02	2.47e-05	0.000362	1		not available
contig_0150932	contig_0150932	1..680	1.17	0.95	1.94	0.16	0.41	1	2.32	2.06	4.17	0.000696	0.00592	1		PREDICTED: tyrosine-protein phosphatase vhp-1-like [Salmo salar]
contig_0009402	contig_0009402	1..556	85.9	0.94	1.92	3.37e-11	3.87e-09	9.16e-06	268.78	2.71	6.55	3.87e-90	2.43e-86	1.03e-84		MHC class I antigen, partial [Salmo salar]
contig_0046515	contig_0046515	1..488	0.82	0.94	1.92	0.31	NaN	1	2.33	2.56	5.91	0.00145	0.01	1		not available
contig_0101950	contig_0101950	1..217	1.83	0.94	1.92	0.31	NaN	1	4.65	2.39	5.26	0.00325	0.02	1		nedd8 activating enzyme E1 subunit 1 [Salmo salar]
contig_0171779	contig_0171779	1..506	0.79	0.94	1.92	0.31	NaN	1	1.87	2.3	4.93	0.00494	0.03	1		PREDICTED: tensin-2-like isoform X2 [Salmo salar]
contig_0016780	contig_0016780	1..201	26.4	0.92	1.89	0.000904	0.01	1	14.49	-2.33	-5.03	4.21e-05	0.000572	1		PREDICTED: GTPase IMAP family member 8-like [Salmo salar]
contig_0023326	contig_0023326	1..608	0.33	0.92	1.89	0.48	NaN	1	1.66	3.35	10.18	0.00166	0.01	1		Dual specificity protein phosphatase 12 [Salmo salar]
contig_0033822	contig_0033822	1..733	0.27	0.92	1.89	0.48	NaN	1	1.12	3.05	8.29	0.00467	0.03	1		PREDICTED: adenomatous polyposis coli protein 2 [Salmo salar]
contig_0035138	contig_0035138	1..1027	0.19	0.92	1.89	0.48	NaN	1	3.38	5.12	34.83	5.23e-07	1.26e-05	0.14		PREDICTED: MAPK/MAK/MRK overlapping kinase-like isoform X5 [Salmo salar]
contig_0041237	contig_0041237	1..291	0.68	0.92	1.89	0.48	NaN	1	3.68	3.43	10.81	0.00121	0.00929	1		not available
contig_0123767	contig_0123767	1..1027	0.19	0.92	1.89	0.48	NaN	1	0.92	3.26	9.55	0.00232	0.02	1		PREDICTED: uncharacterized protein LOC106602472 isoform X1 [Salmo salar]
contig_0208768	contig_0208768	1..203	0.98	0.92	1.89	0.48	NaN	1	3.73	2.94	7.66	0.00678	0.04	1		PREDICTED: N-acetyllactosaminide beta-1,3-N-acetylglucosaminyltransferase 2-like [Salmo salar]
contig_0222243	contig_0222243	1..1005	0.2	0.92	1.89	0.48	NaN	1	0.69	2.81	7.02	0.00999	0.05	1		PREDICTED: pyridoxal phosphate phosphatase-like [Salmo salar]
contig_0141282	contig_0141282	1..649	2.04	0.89	1.85	0.09	0.3	1	5.05	2.31	4.98	6.74e-07	1.58e-05	0.18		PREDICTED: lactase-like protein [Salmo salar]
contig_0111004	contig_0111004	1..608	1.09	0.88	1.84	0.22	0.49	1	2.8	2.36	5.13	0.000186	0.00201	1		PREDICTED: collagen alpha-4(IV) chain-like [Salmo salar]
contig_0130351	contig_0130351	1..290	6.18	0.88	1.84	0.06	0.23	1	12.61	2.04	4.1	1.1e-06	2.44e-05	0.29		PREDICTED: mitotic spindle assembly checkpoint protein MAD1-like, partial [Salmo salar]
contig_0011137	contig_0011137	1..2455	0.95	0.86	1.82	0.04	0.18	1	0.54	-2.18	-4.53	0.00561	0.03	1		not available
contig_0025575	contig_0025575	1..235	1.98	0.85	1.8	0.32	NaN	1	4.29	2.08	4.23	0.00557	0.03	1		PREDICTED: tripartite motif-containing protein 16-like [Salmo salar]
contig_0051174	contig_0051174	1..1064	0.44	0.85	1.8	0.32	NaN	1	1.6	2.83	7.13	7.51e-05	0.000934	1		not available
contig_0095025	contig_0095025	1..345	1.35	0.85	1.8	0.32	NaN	1	2.92	2.08	4.23	0.00557	0.03	1		PREDICTED: kinesin-like protein KIF18A isoform X1 [Salmo salar]
contig_0020839	contig_0020839	1..257	9.55	0.83	1.78	0.04	0.18	1	5.56	-2.29	-4.89	0.00345	0.02	1		PREDICTED: R3H and coiled-coil domain-containing protein 1 isoform X4 [Salmo salar]
contig_0120945	contig_0120945	1..310	14.98	0.84	1.78	0.00381	0.04	1	46.78	2.6	6.07	2.78e-25	1.06e-22	7.4e-20		PREDICTED: extensin-like, partial [Salmo salar]
contig_0137658	contig_0137658	1..1070	0.68	0.83	1.78	0.23	0.5	1	1.53	2.12	4.33	0.000467	0.0043	1		PREDICTED: homeobox protein Nkx-3.2-like [Salmo salar]
contig_0055708	contig_0055708	1..536	3.71	0.82	1.77	0.06	0.24	1	2.17	-3.88	-14.72	0.00598	0.03	1		not available
contig_0068501	contig_0068501	1..393	6.41	0.82	1.76	0.04	0.18	1	3.77	-2.34	-5.07	0.00272	0.02	1		ZK1236.4 [Salmo salar]
contig_0112395	contig_0112395	1..925	0.57	0.78	1.72	0.32	NaN	1	1.3	2.07	4.2	0.00273	0.02	1		PREDICTED: dynactin subunit 1-like, partial [Salmo salar]
contig_0017701	contig_0017701	1..369	0.72	0.77	1.7	0.48	NaN	1	2.73	2.79	6.94	0.00207	0.01	1		Alpha-1,3-mannosyl-glycoprotein 4-beta-N-acetylglucosaminyltransferase B [Salmo salar]
contig_0050273	contig_0050273	1..453	5.56	0.77	1.7	0.05	0.21	1	13.36	2.15	4.45	3.72e-11	2.22e-09	9.91e-06		PREDICTED: cytochrome P450 3A27-like [Salmo salar]
contig_0055676	contig_0055676	1..790	0.34	0.77	1.7	0.48	NaN	1	3.51	4.25	18.99	8.04e-07	1.84e-05	0.21		not available
contig_0060613	contig_0060613	1..411	0.65	0.77	1.7	0.48	NaN	1	1.99	2.5	5.64	0.00684	0.04	1		PREDICTED: B-cell CLL/lymphoma 6 member B protein-like [Salmo salar]
contig_0107642	contig_0107642	1..869	0.31	0.77	1.7	0.48	NaN	1	1.02	2.6	6.07	0.00454	0.03	1		not available
contig_0128093	contig_0128093	1..435	0.61	0.77	1.7	0.48	NaN	1	1.74	2.38	5.21	0.01	0.05	1		not available
contig_0153921	contig_0153921	1..253	1.05	0.77	1.7	0.48	NaN	1	3.49	2.6	6.07	0.00454	0.03	1		PREDICTED: sodium/potassium/calcium exchanger 3-like isoform X2 [Salmo salar]
contig_0164255	contig_0164255	1..675	0.39	0.77	1.7	0.48	NaN	1	1.12	2.38	5.21	0.01	0.05	1		PREDICTED: rab effector MyRIP-like isoform X1 [Salmo salar]
contig_0178096	contig_0178096	1..888	0.3	0.77	1.7	0.48	NaN	1	0.85	2.38	5.21	0.01	0.05	1		PREDICTED: adenylate cyclase type 9 isoform X1 [Salmo salar]
contig_0181299	contig_0181299	1..892	0.3	0.77	1.7	0.48	NaN	1	0.99	2.6	6.07	0.00454	0.03	1		PREDICTED: uncharacterized protein LOC106597293 [Salmo salar]
contig_0005831	contig_0005831	1..319	9.36	0.74	1.67	0.04	0.2	1	22.73	2.14	4.42	9.6e-13	7.53e-11	2.56e-07		Transposable element Tcb1 transposase [Salmo salar]
contig_0120629	contig_0120629	1..230	2.6	0.73	1.66	0.32	0.59	1	6.03	2.06	4.18	0.00136	0.01	1		PREDICTED: translocator protein-like [Salmo salar]
contig_0185650	contig_0185650	1..765	1.21	0.72	1.65	0.23	0.5	1	6.02	3.15	8.86	2.07e-10	1.06e-08	5.52e-05		PREDICTED: lactase-like protein [Salmo salar]
contig_0090754	contig_0090754	1..407	1.63	0.69	1.62	0.32	0.59	1	4.49	2.27	4.83	0.000144	0.00162	1		not available
contig_0097550	contig_0097550	1..331	5.01	0.7	1.62	0.13	0.37	1	13.72	2.27	4.83	1.64e-08	5.65e-07	0.00438		Mitochondrial 39S ribosomal protein L39 [Salmo salar]
contig_0209120	contig_0209120	1..659	0.5	0.68	1.61	0.48	NaN	1	1.34	2.2	4.61	0.00756	0.04	1		PREDICTED: leukotriene B4 receptor 1-like [Salmo salar]
contig_0013015	contig_0013015	1..238	4.46	0.67	1.6	0.23	0.5	1	12.72	2.31	4.94	1.66e-06	3.5e-05	0.44		PREDICTED: autophagy-related protein 16-1-like [Salmo salar]
contig_0087162	contig_0087162	1..1515	0.48	0.66	1.58	0.32	0.59	1	1.5	2.42	5.34	1.7e-05	0.000263	1		PREDICTED: DNA mismatch repair protein Msh2 [Salmo salar]
contig_0013773	contig_0013773	1..561	0.71	0.63	1.55	0.47	NaN	1	2.7	2.66	6.34	0.000225	0.00235	1		PREDICTED: unconventional myosin-Vc-like, partial [Salmo salar]
contig_0076368	contig_0076368	1..1187	1.73	0.63	1.55	0.13	0.37	1	1.16	-4.12	-17.38	0.0034	0.02	1		PREDICTED: histidine-rich protein PFHRP-II-like, partial [Salmo salar]
contig_0091578	contig_0091578	1..982	0.41	0.63	1.55	0.47	NaN	1	1.09	2.17	4.5	0.00365	0.02	1		PREDICTED: acyl carrier protein, mitochondrial-like [Salmo salar]
contig_0176239	contig_0176239	1..1018	0.39	0.63	1.55	0.47	NaN	1	1.05	2.17	4.5	0.00365	0.02	1		PREDICTED: tetratricopeptide repeat protein 17-like [Salmo salar]
contig_0197013	contig_0197013	1..706	0.56	0.63	1.55	0.47	NaN	1	1.43	2.08	4.23	0.00557	0.03	1		PREDICTED: ferredoxin-fold anticodon-binding domain-containing protein 1 homolog, partial [Salmo salar]
contig_0220310	contig_0220310	1..323	1.23	0.63	1.55	0.47	NaN	1	3.51	2.25	4.76	0.0024	0.02	1		PREDICTED: uncharacterized protein LOC106568553, partial [Salmo salar]
contig_0030288	contig_0030288	1..1014	4.91	0.61	1.52	0.02	0.14	1	3.34	-2.38	-5.21	9.94e-06	0.000167	1		PREDICTED: cytosolic sulfotransferase 2-like [Salmo salar]
contig_0012403	contig_0012403	1..421	3.47	0.59	1.5	0.22	0.49	1	2.39	-3.67	-12.73	0.00959	0.05	1		PREDICTED: interferon-induced protein 44-like [Salmo salar]
contig_0057790	contig_0057790	1..334	1.59	0.56	1.48	0.46	NaN	1	4.15	2.06	4.18	0.00136	0.01	1		PREDICTED: peptidase inhibitor 16-like [Salmo salar]
contig_0076349	contig_0076349	1..338	1.57	0.56	1.48	0.46	NaN	1	4.66	2.25	4.75	0.000408	0.00385	1		Trafficking protein particle complex subunit 2-like protein [Salmo salar]
contig_0152633	contig_0152633	1..1996	0.83	0.56	1.48	0.22	0.49	1	0.58	-2.4	-5.27	0.00709	0.04	1		Latent-transforming growth factor beta-binding protein 1 precursor, partial [Salmo salar]
contig_0060386	contig_0060386	1..1507	1.14	0.55	1.47	0.21	0.48	1	0.81	-2.46	-5.5	0.00558	0.03	1		PREDICTED: uncharacterized protein LOC106605365 [Salmo salar]
contig_0092925	contig_0092925	1..453	6.44	0.55	1.47	0.13	0.36	1	4.56	-2.5	-5.67	0.000349	0.00339	1		not available
contig_0144791	contig_0144791	1..400	22.72	0.56	1.47	0.00867	0.07	1	16.01	-3.47	-11.06	9.44e-11	5.16e-09	2.51e-05		not available
contig_0026505	contig_0026505	1..443	1.65	0.51	1.43	0.43	0.68	1	4.27	2	4.01	0.000281	0.00283	1		PREDICTED: alkylated DNA repair protein alkB homolog 1 isoform X3 [Salmo salar]
contig_0038651	contig_0038651	1..257	8.26	0.52	1.43	0.2	0.47	1	5.97	-3.35	-10.21	0.0013	0.00984	1		PREDICTED: somatostatin receptor type 5-like isoform X1 [Salmo salar]
contig_0133387	contig_0133387	1..2125	0.34	0.51	1.43	0.43	0.68	1	1.1	2.31	4.94	1.95e-05	0.000296	1		PREDICTED: BDNF/NT-3 growth factors receptor-like isoform X2 [Salmo salar]
contig_0021163	contig_0021163	1..1067	2.24	0.5	1.42	0.19	0.45	1	1.64	-2.01	-4.02	0.00231	0.02	1		PREDICTED: SPRY domain-containing SOCS box protein 3-like [Salmo salar]
contig_0093628	contig_0093628	1..1123	0.71	0.5	1.42	0.42	0.68	1	2.25	2.28	4.86	1.07e-05	0.000178	1		PREDICTED: zinc finger and BTB domain-containing protein 39-like [Salmo salar]
contig_0114314	contig_0114314	1..1537	1.04	0.5	1.42	0.27	0.54	1	0.76	-2.96	-7.76	0.005	0.03	1		PREDICTED: uncharacterized protein LOC106574635 [Salmo salar]
contig_0079671	contig_0079671	1..733	2.35	0.49	1.41	0.26	0.54	1	1.73	-2.12	-4.35	0.00719	0.04	1		PREDICTED: uncharacterized protein LOC106597293 [Salmo salar]
contig_0145135	contig_0145135	1..434	3.97	0.49	1.41	0.26	0.54	1	2.93	-4	-16.05	0.00447	0.03	1		PREDICTED: receptor-type tyrosine-protein phosphatase S-like isoform X5 [Salmo salar]
contig_0013629	contig_0013629	1..2046	0.91	0.49	1.4	0.26	0.53	1	0.67	-3.2	-9.16	0.00225	0.02	1		PREDICTED: tumor protein D53 isoform X18 [Salmo salar]
contig_0031713	contig_0031713	1..332	6.19	0.47	1.39	0.25	0.52	1	4.62	-2.08	-4.22	0.00357	0.02	1		not available
contig_0075434	contig_0075434	1..1254	1.59	0.48	1.39	0.25	0.52	1	1.18	-2.03	-4.08	0.00456	0.03	1		PREDICTED: tyrosine-protein kinase receptor UFO-like isoform X1 [Salmo salar]
contig_0082853	contig_0082853	1..4443	0.36	0.44	1.36	0.33	0.6	1	0.27	-3.02	-8.11	0.00406	0.02	1		PREDICTED: inactive dipeptidyl peptidase 10-like isoform X1 [Salmo salar]
contig_0283952	contig_0283952	1..321	6.61	0.42	1.34	0.29	0.57	1	25.14	2.47	5.55	1.48e-15	1.8e-13	3.94e-10		not available
contig_0010708	contig_0010708	1..4099	0.32	0.38	1.3	0.44	0.69	1	0.26	-3.74	-13.39	0.00815	0.04	1		PREDICTED: cell death activator CIDE-B isoform X2 [Salmo salar]
contig_0051739	contig_0051739	1..477	3.48	0.38	1.3	0.39	0.65	1	2.77	-3.14	-8.81	0.00273	0.02	1		Transmembrane and TPR repeat-containing protein 4 [Salmo salar]
contig_0054930	contig_0054930	1..2370	0.28	0.38	1.3	0.57	0.78	1	1.06	2.42	5.34	6.44e-06	0.000114	1		PREDICTED: uncharacterized protein LOC106592539 [Salmo salar]
contig_0063780	contig_0063780	1..1474	1.04	0.38	1.3	0.41	0.67	1	0.83	-2.06	-4.17	0.00925	0.05	1		PREDICTED: uncharacterized protein LOC106600457 [Salmo salar]
contig_0092923	contig_0092923	1..2299	0.55	0.38	1.3	0.45	0.69	1	0.44	-2.75	-6.71	0.00958	0.05	1		not available
contig_0094375	contig_0094375	1..1531	1.65	0.38	1.3	0.31	0.58	1	15.16	3.7	13.03	1.25e-42	1.27e-39	3.32e-37		not available
contig_0151499	contig_0151499	1..431	1.85	0.38	1.3	0.54	0.76	1	5.27	2.01	4.02	8.1e-05	0.000996	1		not available
contig_0177120	contig_0177120	1..1334	0.35	0.37	1.3	0.63	NaN	1	1.18	2.25	4.75	0.000408	0.00385	1		PREDICTED: synaptotagmin-17 isoform X1 [Salmo salar]
contig_0008149	contig_0008149	1..226	1.17	0.37	1.29	0.72	NaN	1	4.19	2.3	4.93	0.00494	0.03	1		PREDICTED: protein FAM65A-like isoform X3 [Salmo salar]
contig_0008754	contig_0008754	1..276	0.96	0.37	1.29	0.72	NaN	1	3.2	2.2	4.61	0.00756	0.04	1		PREDICTED: NACHT, LRR and PYD domains-containing protein 3-like isoform X5 [Salmo salar]
contig_0016877	contig_0016877	1..316	0.63	0.37	1.29	0.75	NaN	1	2.39	2.38	5.21	0.01	0.05	1		PREDICTED: uncharacterized protein C17orf62 homolog isoform X2 [Salmo salar]
contig_0021617	contig_0021617	1..668	14.7	0.37	1.29	0.07	0.25	1	11.81	-3.96	-15.53	2.55e-12	1.88e-10	6.79e-07		PREDICTED: brefeldin A-inhibited guanine nucleotide-exchange protein 2-like [Salmo salar]
contig_0023032	contig_0023032	1..2294	0.09	0.37	1.29	0.75	NaN	1	0.36	2.5	5.64	0.00684	0.04	1		PREDICTED: c-reactive protein, pentraxin-related isoform X4 [Salmo salar]
contig_0048649	contig_0048649	1..412	0.81	0.37	1.29	0.68	NaN	1	2.45	2.08	4.23	0.00557	0.03	1		PREDICTED: solute carrier family 45 member 4-like, partial [Salmo salar]
contig_0051244	contig_0051244	1..351	0.57	0.37	1.29	0.75	NaN	1	2.34	2.5	5.64	0.00684	0.04	1		not available
contig_0065925	contig_0065925	1..274	1.21	0.37	1.29	0.68	NaN	1	5.75	2.72	6.6	0.000155	0.00173	1		not available
contig_0102631	contig_0102631	1..1136	0.23	0.37	1.29	0.72	NaN	1	1	2.56	5.91	0.00145	0.01	1		PREDICTED: probable ATP-dependent RNA helicase DDX43 [Salmo salar]
contig_0107151	contig_0107151	1..766	0.35	0.37	1.29	0.72	NaN	1	1.15	2.2	4.61	0.00756	0.04	1		PREDICTED: hepatocyte growth factor-like protein isoform X1 [Salmo salar]
contig_0107695	contig_0107695	1..210	0.95	0.37	1.29	0.75	NaN	1	3.9	2.5	5.64	0.00684	0.04	1		PREDICTED: histone-lysine N-methyltransferase EZH1-like isoform X1 [Salmo salar]
contig_0120489	contig_0120489	1..340	0.59	0.37	1.29	0.75	NaN	1	2.78	2.7	6.51	0.00305	0.02	1		PREDICTED: tubulin--tyrosine ligase-like protein 12 isoform X1 [Salmo salar]
contig_0138221	contig_0138221	1..367	0.54	0.37	1.29	0.75	NaN	1	2.75	2.79	6.94	0.00207	0.01	1		not available
contig_0155879	contig_0155879	1..344	0.58	0.37	1.29	0.75	NaN	1	2.38	2.5	5.64	0.00684	0.04	1		PREDICTED: protein dispatched homolog 1-like isoform X1 [Salmo salar]
contig_0165099	contig_0165099	1..324	1.02	0.37	1.29	0.68	NaN	1	3.7	2.33	5.02	0.00159	0.01	1		PREDICTED: keratin-associated protein 10-9-like isoform X3 [Salmo salar]
contig_0175866	contig_0175866	1..663	0.4	0.37	1.29	0.72	NaN	1	1.33	2.2	4.61	0.00756	0.04	1		PREDICTED: vascular endothelial growth factor receptor 3-like, partial [Salmo salar]
contig_0195096	contig_0195096	1..1011	0.2	0.37	1.29	0.75	NaN	1	1	2.79	6.94	0.00207	0.01	1		PREDICTED: rho guanine nucleotide exchange factor 2-like isoform X3 [Salmo salar]
contig_0203421	contig_0203421	1..448	0.59	0.37	1.29	0.72	NaN	1	2.53	2.56	5.91	0.00145	0.01	1		PREDICTED: protein angel homolog 2 isoform X1 [Salmo salar]
contig_0007079	contig_0007079	1..2112	0.06	0.36	1.28	0.8	NaN	1	0.42	3.16	8.92	0.00327	0.02	1		PREDICTED: ribonuclease-like 3, partial [Salmo salar]
contig_0060844	contig_0060844	1..912	0.15	0.36	1.28	0.8	NaN	1	0.83	2.94	7.66	0.00678	0.04	1		PREDICTED: pinin-like [Salmo salar]
contig_0077503	contig_0077503	1..953	0.14	0.36	1.28	0.8	NaN	1	0.73	2.81	7.02	0.00999	0.05	1		PREDICTED: cathepsin L1-like [Salmo salar]
contig_0098571	contig_0098571	1..526	7.95	0.36	1.28	0.2	0.47	1	6.44	-2.23	-4.7	1.63e-05	0.000253	1		transposase [Salmo salar]
contig_0098728	contig_0098728	1..1380	0.1	0.36	1.28	0.8	NaN	1	0.55	2.94	7.66	0.00678	0.04	1		collagen Type XI Alpha2 [Salmo salar]
contig_0127499	contig_0127499	1..313	0.42	0.36	1.28	0.8	NaN	1	2.22	2.81	7.02	0.00999	0.05	1		PREDICTED: probable G-protein coupled receptor 83 [Salmo salar]
contig_0167339	contig_0167339	1..1108	0.12	0.36	1.28	0.8	NaN	1	2.62	4.86	29.14	2.05e-06	4.2e-05	0.54		not available
contig_0199057	contig_0199057	1..2671	0.05	0.36	1.28	0.8	NaN	1	1.37	5.2	36.72	3.45e-07	8.69e-06	0.09		PREDICTED: unconventional myosin-XVB-like isoform X2 [Salmo salar]
contig_0056203	contig_0056203	1..201	15.18	0.35	1.27	0.31	0.59	1	71.53	2.71	6.53	7.29e-26	2.92e-23	1.94e-20		PREDICTED: FYVE, RhoGEF and PH domain-containing protein 1-like [Salmo salar]
contig_0225714	contig_0225714	1..430	0.15	0.34	1.27	0.86	NaN	1	3.96	5.01	32.22	0.000321	0.00316	1		PREDICTED: uncharacterized protein LOC106591805 [Salmo salar]
contig_0076471	contig_0076471	1..358	5.56	0.33	1.26	0.41	0.67	1	4.58	-2.49	-5.61	0.00136	0.01	1		not available
contig_0080275	contig_0080275	1..402	3.3	0.31	1.24	0.52	0.75	1	2.77	-2.33	-5.03	0.00904	0.04	1		PREDICTED: CAD protein-like isoform X4 [Salmo salar]
contig_0109706	contig_0109706	1..329	8.27	0.28	1.21	0.44	0.69	1	7.08	-2.01	-4.03	0.000498	0.00451	1		not available
contig_0005379	contig_0005379	1..275	5.31	0.25	1.19	0.58	0.79	1	4.62	-4	-16.05	0.00447	0.03	1		PREDICTED: protein NLRC3-like [Salmo salar]
contig_0173246	contig_0173246	1..2173	0.34	0.25	1.19	0.69	0.85	1	1.48	2.51	5.68	3.48e-07	8.77e-06	0.09		not available
contig_0015738	contig_0015738	1..772	1.72	0.24	1.18	0.61	0.81	1	1.51	-2.96	-7.76	0.005	0.03	1		not available
contig_0017083	contig_0017083	1..2154	2.06	0.24	1.18	0.38	0.64	1	1.82	-3.42	-10.74	5.09e-07	1.23e-05	0.14		SPATA5 [Salmo salar]
contig_0030555	contig_0030555	1..1065	8.91	0.24	1.18	0.24	0.51	1	7.85	-2.11	-4.32	4.67e-11	2.73e-09	1.24e-05		PREDICTED: fumarate hydratase, mitochondrial-like [Salmo salar]
contig_0066629	contig_0066629	1..1152	1.61	0.23	1.18	0.57	0.79	1	1.42	-2.17	-4.51	0.0022	0.01	1		FGF2 [Salmo salar]
contig_0080393	contig_0080393	1..730	1.73	0.23	1.18	0.63	0.82	1	1.52	-2.89	-7.41	0.00617	0.03	1		PREDICTED: uncharacterized protein LOC106609981 isoform X1 [Salmo salar]
contig_0039307	contig_0039307	1..1029	1.68	0.22	1.17	0.6	0.8	1	1.49	-2.79	-6.93	0.00145	0.01	1		not available
contig_0062568	contig_0062568	1..1675	1.03	0.22	1.17	0.6	0.8	1	0.92	-2.08	-4.22	0.00357	0.02	1		PREDICTED: UDP-N-acetylglucosamine transporter-like isoform X3 [Salmo salar]
contig_0081241	contig_0081241	1..320	7.26	0.22	1.17	0.55	0.77	1	6.45	-2.03	-4.08	0.000942	0.0076	1		Deoxyribonuclease gamma precursor [Salmo salar]
contig_0099472	contig_0099472	1..1630	0.37	0.23	1.17	0.74	0.88	1	1.16	2	4.01	0.000281	0.00283	1		not available
contig_0017507	contig_0017507	1..2210	3.33	0.21	1.16	0.34	0.61	1	2.99	-2.62	-6.13	1.59e-10	8.31e-09	4.22e-05		PREDICTED: interleukin-17 receptor D isoform X3 [Salmo salar]
contig_0056439	contig_0056439	1..817	1.95	0.21	1.16	0.63	0.82	1	1.75	-2.29	-4.89	0.00345	0.02	1		not available
contig_0020492	contig_0020492	1..1042	1.97	0.2	1.15	0.6	0.8	1	1.78	-4.55	-23.37	0.00116	0.00897	1		PREDICTED: uncharacterized protein LOC106600457 [Salmo salar]
contig_0039367	contig_0039367	1..334	9.33	0.21	1.15	0.54	0.76	1	8.4	-2.28	-4.85	6.52e-05	0.000831	1		not available
contig_0052002	contig_0052002	1..2634	0.58	0.2	1.15	0.65	0.83	1	0.52	-3.2	-9.16	0.00225	0.02	1		PREDICTED: ventricular zone-expressed PH domain-containing protein-like, partial [Salmo salar]
contig_0020064	contig_0020064	1..1541	4.43	0.18	1.14	0.41	0.67	1	4.05	-5.37	-41.4	9.75e-08	2.8e-06	0.03		PREDICTED: haptoglobin-like isoform X2 [Salmo salar]
contig_0061174	contig_0061174	1..1524	2.44	0.19	1.14	0.51	0.75	1	9.68	2.3	4.93	5.7e-23	1.68e-20	1.52e-17		PREDICTED: lactase-like protein [Salmo salar]
contig_0066312	contig_0066312	1..549	2.54	0.19	1.14	0.69	0.85	1	2.31	-2.52	-5.74	0.00441	0.03	1		PREDICTED: uncharacterized protein LOC106605384, partial [Salmo salar]
contig_0113135	contig_0113135	1..471	5.77	0.18	1.14	0.6	0.8	1	5.28	-2.77	-6.83	6.44e-05	0.000822	1		not available
contig_0124101	contig_0124101	1..970	2.39	0.19	1.14	0.62	0.81	1	2.18	-2.54	-5.81	0.00028	0.00282	1		PREDICTED: uncharacterized protein LOC106597293 [Salmo salar]
contig_0126301	contig_0126301	1..653	2.13	0.19	1.14	0.69	0.85	1	1.95	-2.12	-4.35	0.00719	0.04	1		not available
contig_0167839	contig_0167839	1..1104	1.26	0.19	1.14	0.69	0.85	1	1.15	-4	-16.05	0.00447	0.03	1		not available
contig_0006331	contig_0006331	1..1223	2.17	0.18	1.13	0.62	0.81	1	1.99	-2.07	-4.21	0.000314	0.00311	1		Transposable element Tcb1 transposase [Salmo salar]
contig_0017276	contig_0017276	1..3522	0.98	0.17	1.13	0.59	0.79	1	0.9	-2.14	-4.41	3.88e-05	0.000533	1		collagen Type XI Alpha2 [Salmo salar]
contig_0071253	contig_0071253	1..414	10.26	0.17	1.13	0.53	0.75	1	9.46	-2.59	-6.03	1.28e-06	2.79e-05	0.34		PREDICTED: zinc finger protein 519-like [Salmo salar]
contig_0027129	contig_0027129	1..1392	0.86	0.16	1.12	0.75	0.89	1	0.8	-2.33	-5.03	0.00904	0.04	1		PREDICTED: uncharacterized protein LOC106590369 [Salmo salar]
contig_0050050	contig_0050050	1..1507	0.84	0.17	1.12	0.73	0.87	1	0.77	-3.88	-14.72	0.00598	0.03	1		PREDICTED: potassium voltage-gated channel subfamily H member 2-like isoform X1 [Salmo salar]
contig_0052756	contig_0052756	1..1187	1.34	0.16	1.12	0.72	0.87	1	1.25	-2.74	-6.69	0.0018	0.01	1		not available
contig_0054841	contig_0054841	1..1726	10.38	0.16	1.12	0.34	0.61	1	9.66	-6.23	-74.98	5.96e-14	5.56e-12	1.59e-08		myosin 1, partial [Salmo salar]
contig_0059116	contig_0059116	1..300	5.53	0.17	1.12	0.7	0.86	1	5.12	-2.08	-4.22	0.00357	0.02	1		PREDICTED: chloride channel protein 2-like isoform X3 [Salmo salar]
contig_0060327	contig_0060327	1..506	2.36	0.16	1.12	0.75	0.89	1	2.2	-3.81	-14.06	0.00696	0.04	1		ORF2 protein [Salmo salar]
contig_0085181	contig_0085181	1..1417	0.89	0.17	1.12	0.73	0.87	1	0.82	-2.96	-7.76	0.005	0.03	1		Deoxyribonuclease gamma precursor [Salmo salar]
contig_0096049	contig_0096049	1..2404	0.5	0.16	1.12	0.75	0.89	1	1.73	2.08	4.22	2.02e-07	5.39e-06	0.05		PREDICTED: uncharacterized protein LOC106591805 [Salmo salar]
contig_0132869	contig_0132869	1..1353	0.83	0.15	1.11	0.77	0.9	1	0.78	-3.74	-13.39	0.00815	0.04	1		PREDICTED: T-complex protein 11-like protein 1 isoform X1 [Salmo salar]
contig_0002307	contig_0002307	1..1849	29.81	0.14	1.1	0.31	0.58	1	28.2	-5.91	-60.25	1.41e-42	1.42e-39	3.77e-37		PREDICTED: uncharacterized protein LOC106581372 [Salmo salar]
contig_0066828	contig_0066828	1..899	3.62	0.14	1.1	0.68	0.85	1	3.42	-2.6	-6.05	1.42e-05	0.000226	1		PREDICTED: TBC1 domain family member 9B-like [Salmo salar]
contig_0054180	contig_0054180	1..671	2.08	0.13	1.09	0.78	0.9	1	1.97	-2.18	-4.53	0.00561	0.03	1		RCC2 homolog [Salmo salar]
contig_0103707	contig_0103707	1..1142	2.38	0.12	1.09	0.73	0.87	1	2.27	-2.57	-5.95	6.16e-05	0.000792	1		not available
contig_0144454	contig_0144454	1..267	6.46	0.13	1.09	0.76	0.89	1	6.15	-2.17	-4.51	0.0022	0.01	1		not available
contig_0030699	contig_0030699	1..433	12.41	0.11	1.08	0.67	0.84	1	11.98	-3	-7.98	1.45e-08	5.05e-07	0.00386		PREDICTED: mucin-5AC-like [Salmo salar]
contig_0040781	contig_0040781	1..781	1.61	0.1	1.08	0.83	0.92	1	1.56	-2.06	-4.17	0.00925	0.05	1		not available
contig_0045115	contig_0045115	1..528	2.39	0.1	1.08	0.83	0.92	1	2.31	-3.02	-8.11	0.00406	0.02	1		PREDICTED: Abelson tyrosine-protein kinase 2 isoform X2 [Salmo salar]
contig_0053829	contig_0053829	1..559	0.59	0.12	1.08	0.9	NaN	1	2.26	2.15	4.42	0.0018	0.01	1		PREDICTED: NACHT, LRR and PYD domains-containing protein 12-like [Salmo salar]
contig_0074693	contig_0074693	1..1783	0.71	0.1	1.08	0.83	0.92	1	0.68	-2.06	-4.17	0.00925	0.05	1		PREDICTED: tyrosine-protein phosphatase non-receptor type 21-like isoform X2 [Salmo salar]
contig_0079502	contig_0079502	1..445	0.75	0.12	1.08	0.9	NaN	1	2.69	2.07	4.2	0.00273	0.02	1		PREDICTED: nicotinate-nucleotide pyrophosphorylase [carboxylating]-like isoform X3 [Salmo salar]
contig_0093412	contig_0093412	1..653	0.51	0.12	1.08	0.9	NaN	1	1.83	2.07	4.2	0.00273	0.02	1		PREDICTED: gastrula zinc finger protein 5-1-like [Salmo salar]
contig_0135529	contig_0135529	1..852	0.39	0.12	1.08	0.9	NaN	1	1.55	2.22	4.64	0.0012	0.00922	1		SPATA5 [Salmo salar]
contig_0146459	contig_0146459	1..1576	0.8	0.1	1.08	0.83	0.92	1	0.77	-3.02	-8.11	0.00406	0.02	1		not available
contig_0038130	contig_0038130	1..1521	1.53	0.08	1.06	0.82	0.92	1	1.5	-2.17	-4.49	0.000371	0.00356	1		PREDICTED: neurotrophin receptor-interacting factor 1-like isoform X1 [Salmo salar]
contig_0124075	contig_0124075	1..1200	1.49	0.09	1.06	0.83	0.92	1	1.46	-2.26	-4.8	0.00137	0.01	1		PREDICTED: zinc finger protein 585A-like [Salmo salar]
contig_0225460	contig_0225460	1..293	2.04	0.09	1.06	0.89	0.96	1	10.11	2.51	5.71	8.64e-07	1.96e-05	0.23		not available
contig_0057634	contig_0057634	1..373	3.02	0.08	1.05	0.88	0.95	1	2.98	-2.89	-7.41	0.00617	0.03	1		PREDICTED: clathrin heavy chain 1-like isoform X4 [Salmo salar]
contig_0091042	contig_0091042	1..537	5.81	0.08	1.05	0.82	0.92	1	5.72	-3.79	-13.83	9.71e-06	0.000163	1		PREDICTED: uncharacterized protein LOC106564798 isoform X1 [Salmo salar]
contig_0095763	contig_0095763	1..951	1.19	0.08	1.05	0.88	0.95	1	1.17	-2.33	-5.03	0.00904	0.04	1		PREDICTED: ankyrin repeat and SOCS box protein 7-like [Salmo salar]
contig_0042947	contig_0042947	1..712	3.35	0.06	1.04	0.87	0.95	1	3.35	-2.23	-4.7	0.000235	0.00244	1		PREDICTED: plasma membrane calcium-transporting ATPase 3-like isoform X6 [Salmo salar]
contig_0060765	contig_0060765	1..469	3.96	0.06	1.04	0.88	0.95	1	3.95	-2.35	-5.09	0.000859	0.00704	1		not available
contig_0065545	contig_0065545	1..889	0.3	0.06	1.04	0.95	NaN	1	16.67	5.95	61.79	8.78e-20	1.79e-17	2.34e-14		collagen Type XI Alpha2 [Salmo salar]
contig_0076112	contig_0076112	1..656	1.62	0.06	1.04	0.91	0.96	1	1.61	-2.82	-7.06	0.00767	0.04	1		PREDICTED: trichohyalin-like [Salmo salar]
contig_0083667	contig_0083667	1..865	1.84	0.06	1.04	0.89	0.96	1	1.84	-2.13	-4.37	0.0028	0.02	1		PREDICTED: uncharacterized protein LOC106584893 isoform X1 [Salmo salar]
contig_0109638	contig_0109638	1..658	1.61	0.06	1.04	0.91	0.96	1	1.61	-2.82	-7.06	0.00767	0.04	1		not available
contig_0112829	contig_0112829	1..1136	1.17	0.06	1.04	0.9	0.96	1	1.16	-2.18	-4.53	0.00561	0.03	1		PREDICTED: CREB3 regulatory factor-like isoform X3 [Salmo salar]
contig_0148190	contig_0148190	1..1694	0.16	0.06	1.04	0.95	NaN	1	0.67	2.25	4.76	0.0024	0.02	1		UPF0527 membrane protein [Salmo salar]
contig_0015304	contig_0015304	1..753	2.32	0.04	1.03	0.93	0.97	1	2.32	-2.01	-4.02	0.00231	0.02	1		PREDICTED: tRNA-specific adenosine deaminase 2 isoform X2 [Salmo salar]
contig_0018277	contig_0018277	1..3659	0.69	0.04	1.03	0.9	0.96	1	0.69	-2.54	-5.83	7.61e-05	0.000945	1		Transposable element Tcb1 transposase [Salmo salar]
contig_0020534	contig_0020534	1..942	1.07	0.04	1.03	0.94	0.98	1	1.07	-3.67	-12.73	0.00959	0.05	1		PREDICTED: serine/threonine-protein phosphatase 6 regulatory ankyrin repeat subunit C-like isoform X1 [Salmo salar]
contig_0025980	contig_0025980	1..1252	0.97	0.03	1.02	0.96	0.98	1	0.97	-2.06	-4.17	0.00925	0.05	1		PREDICTED: ciliary neurotrophic factor receptor subunit alpha-like [Salmo salar]
contig_0036467	contig_0036467	1..1287	2.47	0.03	1.02	0.93	0.97	1	2.47	-2.14	-4.41	3.88e-05	0.000533	1		PREDICTED: uncharacterized protein LOC106611174 [Salmo salar]
contig_0043481	contig_0043481	1..1661	0.89	0.03	1.02	0.94	0.98	1	0.89	-2.74	-6.69	0.0018	0.01	1		PREDICTED: nibrin-like [Salmo salar]
contig_0081913	contig_0081913	1..2566	1.03	0.02	1.02	0.95	0.98	1	1.03	-2.38	-5.22	7.74e-05	0.000958	1		PREDICTED: intelectin [Salmo salar]
contig_0099442	contig_0099442	1..464	2.62	0.03	1.02	0.96	0.98	1	2.62	-2.46	-5.5	0.00558	0.03	1		PREDICTED: protein Dos-like [Salmo salar]
contig_0107611	contig_0107611	1..1783	0.68	0.03	1.02	0.96	0.98	1	0.68	-2.46	-5.5	0.00558	0.03	1		not available
contig_0005141	contig_0005141	1..1397	1.17	0.01	1.01	0.98	0.99	1	1.17	-2.49	-5.61	0.00136	0.01	1		PREDICTED: 40S ribosomal protein S5-like [Salmo salar]
contig_0050328	contig_0050328	1..1091	1.31	0.02	1.01	0.97	0.99	1	1.31	-4.17	-18.05	0.00298	0.02	1		PREDICTED: protein angel homolog 2 isoform X3 [Salmo salar]
contig_0076066	contig_0076066	1..265	10.59	0.01	1.01	0.98	0.99	1	10.59	-2.11	-4.32	0.000109	0.00128	1		GTPase IMAP family member 7 [Salmo salar]
contig_0077044	contig_0077044	1..1306	0.89	0.00876	1.01	0.99	0.99	1	0.89	-3.88	-14.72	0.00598	0.03	1		PREDICTED: uncharacterized protein LOC106570562 isoform X5 [Salmo salar]
contig_0108942	contig_0108942	1..1968	0.83	0.01	1.01	0.98	0.99	1	0.83	-2.17	-4.51	0.0022	0.01	1		not available
contig_0140526	contig_0140526	1..2477	0.94	0.00861	1.01	0.98	0.99	1	0.94	-2.01	-4.03	0.000498	0.00451	1		PREDICTED: striatin-4-like isoform X1 [Salmo salar]
contig_0018771	contig_0018771	1..2205	1.56	0.00203	1	0.99	1	1	1.56	-2.25	-4.77	1.31e-05	0.000211	1		PREDICTED: zinc finger BED domain-containing protein 5-like [Salmo salar]
contig_0051759	contig_0051759	1..535	6.93	0.00613	1	0.98	0.99	1	6.93	-5.54	-46.64	6.53e-05	0.000832	1		PREDICTED: splicing factor 3A subunit 2-like [Salmo salar]
contig_0074841	contig_0074841	1..881	5.23	0.00366	1	0.99	1	1	5.23	-2.3	-4.92	6.09e-07	1.44e-05	0.16		PREDICTED: nuclear GTPase SLIP-GC-like isoform X2 [Salmo salar]
contig_0037693	contig_0037693	1..493	3.65	-0.00634	-1	0.99	1	1	3.65	-2.05	-4.14	0.00181	0.01	1		myosin 1, partial [Salmo salar]
contig_0069166	contig_0069166	1..2133	0.52	-0.01	-1.01	0.98	0.99	1	0.52	-2.89	-7.41	0.00617	0.03	1		not available
contig_0127986	contig_0127986	1..496	5.87	-0.00845	-1.01	0.98	0.99	1	5.87	-2.01	-4.04	0.000117	0.00137	1		PREDICTED: tumor necrosis factor ligand superfamily member 10-like [Salmo salar]
contig_0131039	contig_0131039	1..460	2.42	-0.01	-1.01	0.98	0.99	1	2.42	-2.89	-7.41	0.00617	0.03	1		Transposable element Tc1 transposase [Salmo salar]
contig_0263020	contig_0263020	1..281	6.22	-0.02	-1.01	0.96	0.98	1	6.22	-3.54	-11.61	0.000653	0.00562	1		olfactory receptor family C subfamily 4 member 9 [Salmo salar]
contig_0000157	contig_0000157	1..1515	1.12	-0.03	-1.02	0.94	0.98	1	1.12	-2.53	-5.79	0.00108	0.00849	1		olfactory receptor family C subfamily 4 member 9 [Salmo salar]
contig_0061290	contig_0061290	1..2081	1.32	-0.03	-1.02	0.92	0.97	1	1.32	-2.25	-4.76	8.12e-05	0.000999	1		not available
contig_0065158	contig_0065158	1..433	3.42	-0.03	-1.02	0.94	0.98	1	3.42	-2.34	-5.07	0.00272	0.02	1		PREDICTED: interleukin-6 receptor subunit beta-like isoform X2 [Salmo salar]
contig_0113679	contig_0113679	1..832	2.04	-0.03	-1.02	0.94	0.98	1	2.04	-2.53	-5.79	0.00108	0.00849	1		PREDICTED: striatin-4-like isoform X1 [Salmo salar]
contig_0131650	contig_0131650	1..649	0.33	-0.03	-1.02	0.98	NaN	1	1.36	2.2	4.61	0.00756	0.04	1		PREDICTED: transmembrane protein 232 isoform X1 [Salmo salar]
contig_0145023	contig_0145023	1..1842	0.11	-0.03	-1.02	0.98	NaN	1	0.48	2.2	4.61	0.00756	0.04	1		not available
contig_0184751	contig_0184751	1..779	0.27	-0.03	-1.02	0.98	NaN	1	8.74	5.14	35.28	2.14e-12	1.59e-10	5.69e-07		not available
contig_0006416	contig_0006416	1..1323	9.16	-0.04	-1.03	0.83	0.92	1	9.16	-7.25	-152.38	1.33e-07	3.71e-06	0.04		PREDICTED: GTPase IMAP family member 4-like [Salmo salar]
contig_0034191	contig_0034191	1..3464	2.17	-0.04	-1.03	0.85	0.94	1	2.17	-2.25	-4.76	1.1e-10	5.96e-09	2.93e-05		PREDICTED: uncharacterized protein LOC106597293 [Salmo salar]
contig_0093803	contig_0093803	1..372	7.83	-0.04	-1.03	0.9	0.96	1	7.83	-2.01	-4.04	0.000117	0.00137	1		PREDICTED: alkyldihydroxyacetonephosphate synthase, peroxisomal-like isoform X2 [Salmo salar]
contig_0019773	contig_0019773	1..2727	0.45	-0.05	-1.04	0.91	0.96	1	0.45	-2.46	-5.5	0.00558	0.03	1		PREDICTED: semaphorin-5B-like isoform X3 [Salmo salar]
contig_0024467	contig_0024467	1..434	2.81	-0.05	-1.04	0.91	0.96	1	2.81	-2.06	-4.17	0.00925	0.05	1		PREDICTED: taste receptor type 1 member 1 [Salmo salar]
contig_0030764	contig_0030764	1..1491	0.82	-0.05	-1.04	0.91	0.96	1	0.82	-2.46	-5.5	0.00558	0.03	1		PREDICTED: gastrula zinc finger protein XlCGF26.1-like [Salmo salar]
contig_0062200	contig_0062200	1..1845	0.89	-0.05	-1.04	0.91	0.96	1	0.89	-2.49	-5.61	0.00136	0.01	1		PREDICTED: cx9C motif-containing protein 4 isoform X1 [Salmo salar]
contig_0083283	contig_0083283	1..407	2.99	-0.05	-1.04	0.91	0.96	1	2.99	-2.06	-4.17	0.00925	0.05	1		PREDICTED: uncharacterized protein LOC106582388 isoform X4 [Salmo salar]
contig_0110530	contig_0110530	1..546	2.62	-0.05	-1.04	0.91	0.96	1	2.62	-2.69	-6.46	0.00224	0.02	1		not available
contig_0162933	contig_0162933	1..1594	1.79	-0.05	-1.04	0.88	0.95	1	1.79	-3.29	-9.75	1.46e-05	0.000231	1		PREDICTED: CCR4-NOT transcription complex subunit 4-like, partial [Salmo salar]
contig_0002165	contig_0002165	1..371	521.53	-0.07	-1.05	0.57	0.79	1	521.53	-2.52	-5.75	6.46e-79	2.37e-75	1.72e-73		MHC class I, partial [Salmo salar]
contig_0013860	contig_0013860	1..264	13.43	-0.07	-1.05	0.81	0.92	1	13.43	-2.3	-4.92	8.58e-06	0.000147	1		PREDICTED: interferon-induced very large GTPase 1-like [Salmo salar]
contig_0118170	contig_0118170	1..308	19.94	-0.07	-1.05	0.77	0.9	1	19.94	-3.6	-12.09	2.57e-10	1.29e-08	6.83e-05		not available
contig_0008528	contig_0008528	1..253	4.6	-0.08	-1.06	0.88	0.95	1	4.6	-2.4	-5.27	0.00709	0.04	1		PREDICTED: probable E3 ubiquitin-protein ligase HERC3 [Salmo salar]
contig_0017825	contig_0017825	1..551	2.11	-0.08	-1.06	0.88	0.95	1	2.11	-3.88	-14.72	0.00598	0.03	1		PREDICTED: uncharacterized protein LOC106600097, partial [Salmo salar]
contig_0201924	contig_0201924	1..260	4.48	-0.08	-1.06	0.88	0.95	1	4.48	-3.88	-14.72	0.00598	0.03	1		PREDICTED: ras-related protein Rab-39B-like [Salmo salar]
contig_0293217	contig_0293217	1..254	6.88	-0.08	-1.06	0.85	0.94	1	29.54	2.28	4.85	8.67e-14	7.83e-12	2.31e-08		not available
contig_0015371	contig_0015371	1..326	6.33	-0.1	-1.07	0.81	0.91	1	6.33	-2.03	-4.08	0.000942	0.0076	1		not available
contig_0022012	contig_0022012	1..2007	0.66	-0.09	-1.07	0.85	0.94	1	0.66	-2.18	-4.53	0.00561	0.03	1		PREDICTED: zinc finger protein 536-like [Salmo salar]
contig_0037202	contig_0037202	1..1030	2.36	-0.1	-1.07	0.79	0.91	1	2.36	-2.26	-4.8	0.000188	0.00202	1		PREDICTED: AT-rich interactive domain-containing protein 4B-like isoform X2 [Salmo salar]
contig_0039703	contig_0039703	1..543	2.05	-0.1	-1.07	0.84	0.93	1	2.05	-2.33	-5.03	0.00904	0.04	1		PREDICTED: cyclin-dependent kinase 19 isoform X1 [Salmo salar]
contig_0058802	contig_0058802	1..970	1.15	-0.1	-1.07	0.84	0.93	1	1.15	-2.89	-7.41	0.00617	0.03	1		not available
contig_0065139	contig_0065139	1..1756	0.96	-0.1	-1.07	0.82	0.92	1	0.96	-2.22	-4.66	0.00173	0.01	1		PREDICTED: porphobilinogen deaminase-like isoform X2 [Salmo salar]
contig_0072204	contig_0072204	1..639	1.74	-0.1	-1.07	0.84	0.93	1	1.74	-2.89	-7.41	0.00617	0.03	1		PREDICTED: uncharacterized protein LOC106611174 [Salmo salar]
contig_0077313	contig_0077313	1..255	4.36	-0.1	-1.07	0.84	0.93	1	4.36	-2.89	-7.41	0.00617	0.03	1		PREDICTED: uncharacterized protein LOC106590818, partial [Salmo salar]
contig_0084880	contig_0084880	1..479	3.54	-0.1	-1.07	0.82	0.92	1	3.54	-2.53	-5.79	0.00108	0.00849	1		PREDICTED: uncharacterized protein LOC106587657 isoform X2 [Salmo salar]
contig_0088743	contig_0088743	1..1269	2.96	-0.1	-1.07	0.74	0.88	1	2.96	-2.12	-4.35	1.02e-05	0.00017	1		PREDICTED: A disintegrin and metalloproteinase with thrombospondin motifs 17-like [Salmo salar]
contig_0135715	contig_0135715	1..1483	0.75	-0.1	-1.07	0.84	0.93	1	0.75	-2.89	-7.41	0.00617	0.03	1		PREDICTED: neurotrophin receptor-interacting factor 1-like isoform X1 [Salmo salar]
contig_0020460	contig_0020460	1..887	1.43	-0.12	-1.08	0.81	0.92	1	1.43	-3.08	-8.46	0.00332	0.02	1		PREDICTED: protein lifeguard 1-like [Salmo salar]
contig_0036546	contig_0036546	1..2117	0.6	-0.12	-1.08	0.81	0.92	1	0.6	-2.52	-5.74	0.00441	0.03	1		PREDICTED: uncharacterized protein LOC106609026 [Salmo salar]
contig_0038023	contig_0038023	1..756	1.68	-0.12	-1.08	0.81	0.92	1	1.68	-3.08	-8.46	0.00332	0.02	1		Transcription factor Adf-1 [Salmo salar]
contig_0105464	contig_0105464	1..1329	0.96	-0.12	-1.08	0.81	0.92	1	0.96	-2.52	-5.74	0.00441	0.03	1		ORF2 protein [Salmo salar]
contig_0110005	contig_0110005	1..1824	0.9	-0.11	-1.08	0.79	0.91	1	0.9	-2.17	-4.51	0.0022	0.01	1		Transposable element Tcb2 transposase [Salmo salar]
contig_0016375	contig_0016375	1..1594	1.13	-0.12	-1.09	0.77	0.9	1	1.13	-2.05	-4.14	0.00181	0.01	1		PREDICTED: uncharacterized protein LOC106577175 [Salmo salar]
contig_0042172	contig_0042172	1..2124	0.67	-0.13	-1.09	0.79	0.9	1	0.67	-2.29	-4.89	0.00345	0.02	1		PREDICTED: MARVEL domain-containing protein 3-like isoform X1 [Salmo salar]
contig_0086999	contig_0086999	1..453	3.16	-0.13	-1.09	0.79	0.9	1	3.16	-3.25	-9.51	0.00187	0.01	1		PREDICTED: uncharacterized protein LOC106569078 [Salmo salar]
contig_0103433	contig_0103433	1..1055	1.35	-0.13	-1.09	0.79	0.9	1	1.35	-3.25	-9.51	0.00187	0.01	1		SPATA5 [Salmo salar]
contig_0115494	contig_0115494	1..2617	0.75	-0.13	-1.09	0.75	0.89	1	0.75	-2.43	-5.38	0.000545	0.00485	1		PREDICTED: zinc finger protein 362-like isoform X3 [Salmo salar]
contig_0117997	contig_0117997	1..700	2.57	-0.12	-1.09	0.77	0.9	1	2.57	-2.62	-6.15	0.000695	0.00592	1		PREDICTED: regulator of G-protein signaling 1-like [Salmo salar]
contig_0129884	contig_0129884	1..808	2.42	-0.13	-1.09	0.75	0.89	1	2.42	-2.17	-4.5	0.00089	0.00724	1		PREDICTED: collagen alpha-6(VI) chain-like [Salmo salar]
contig_0151427	contig_0151427	1..1042	1.37	-0.13	-1.09	0.79	0.9	1	1.37	-2.29	-4.89	0.00345	0.02	1		interleukin-17A/F3 [Salmo salar]
contig_0014293	contig_0014293	1..1600	1.09	-0.14	-1.1	0.74	0.88	1	1.09	-2.01	-4.02	0.00231	0.02	1		transposase [Salmo salar]
contig_0022367	contig_0022367	1..1565	4.03	-0.14	-1.1	0.55	0.77	1	4.03	-2.28	-4.87	2.07e-09	8.71e-08	0.000551		PREDICTED: zonadhesin-like [Salmo salar]
contig_0041422	contig_0041422	1..1029	1.18	-0.14	-1.1	0.78	0.9	1	1.18	-2.46	-5.5	0.00558	0.03	1		Regulator of G-protein signaling 18 [Salmo salar]
contig_0058189	contig_0058189	1..256	6.82	-0.14	-1.1	0.74	0.88	1	6.82	-2.26	-4.8	0.00137	0.01	1		PREDICTED: ubiquitin-conjugating enzyme E2 E1-like [Salmo salar]
contig_0096560	contig_0096560	1..2569	0.68	-0.14	-1.1	0.74	0.88	1	0.68	-2.01	-4.02	0.00231	0.02	1		PREDICTED: uncharacterized protein LOC106565892 [Salmo salar]
contig_0099852	contig_0099852	1..1318	0.8	-0.13	-1.1	0.8	0.91	1	0.8	-2.82	-7.06	0.00767	0.04	1		not available
contig_0128701	contig_0128701	1..1690	1.03	-0.14	-1.1	0.74	0.88	1	1.03	-2.01	-4.02	0.00231	0.02	1		PREDICTED: nesprin-1 isoform X9 [Salmo salar]
contig_0182342	contig_0182342	1..1199	1.02	-0.14	-1.1	0.78	0.9	1	1.02	-2.46	-5.5	0.00558	0.03	1		PREDICTED: solute carrier family 23 member 1-like [Salmo salar]
contig_0009780	contig_0009780	1..309	4.45	-0.15	-1.11	0.75	0.89	1	4.45	-2.23	-4.71	0.00439	0.03	1		PREDICTED: CCR4-NOT transcription complex, subunit 6 isoform X1 [Salmo salar]
contig_0022064	contig_0022064	1..462	4.12	-0.14	-1.11	0.73	0.87	1	4.12	-3.66	-12.66	0.000404	0.00382	1		not available
contig_0026757	contig_0026757	1..940	1.46	-0.15	-1.11	0.75	0.89	1	1.46	-4.12	-17.38	0.0034	0.02	1		Transposable element Tc1 transposase [Salmo salar]
contig_0030609	contig_0030609	1..241	19.99	-0.15	-1.11	0.57	0.78	1	19.99	-2.36	-5.15	2.72e-07	7.04e-06	0.07		PREDICTED: ABC transporter F family member 4-like, partial [Salmo salar]
contig_0077926	contig_0077926	1..3514	0.59	-0.15	-1.11	0.71	0.86	1	0.59	-2.82	-7.05	0.000242	0.00249	1		Sulfate transporter [Salmo salar]
contig_0114365	contig_0114365	1..437	1.57	-0.15	-1.11	0.82	0.92	1	8.22	2.55	5.87	7.25e-08	2.14e-06	0.02		PREDICTED: tensin-1 isoform X7 [Salmo salar]
contig_0056374	contig_0056374	1..575	1.75	-0.17	-1.12	0.76	0.89	1	1.75	-2.75	-6.71	0.00958	0.05	1		SPATA5 [Salmo salar]
contig_0081293	contig_0081293	1..483	2.08	-0.17	-1.12	0.76	0.89	1	2.08	-2.75	-6.71	0.00958	0.05	1		PREDICTED: integrator complex subunit 10 isoform X1 [Salmo salar]
contig_0099868	contig_0099868	1..914	1.1	-0.17	-1.12	0.76	0.89	1	1.1	-3.67	-12.73	0.00959	0.05	1		not available
contig_0114577	contig_0114577	1..328	3.07	-0.17	-1.12	0.76	0.89	1	3.07	-3.67	-12.73	0.00959	0.05	1		PREDICTED: protein patched homolog 1 isoform X2 [Salmo salar]
contig_0127983	contig_0127983	1..495	1.71	-0.16	-1.12	0.79	0.9	1	6.62	2.12	4.36	1.9e-06	3.95e-05	0.51		not available
contig_0190673	contig_0190673	1..1442	0.7	-0.17	-1.12	0.76	0.89	1	0.7	-3.67	-12.73	0.00959	0.05	1		PREDICTED: 12-(S)-hydroxy-5,8,10,14-eicosatetraenoic acid receptor-like [Salmo salar]
contig_0026954	contig_0026954	1..2367	0.63	-0.18	-1.13	0.7	0.86	1	4.02	2.86	7.25	2.19e-19	4.29e-17	5.84e-14		not available
contig_0040014	contig_0040014	1..2068	0.87	-0.18	-1.13	0.67	0.84	1	0.87	-2.31	-4.95	0.00108	0.00849	1		PREDICTED: CD166 antigen homolog isoform X3 [Salmo salar]
contig_0074443	contig_0074443	1..1459	0.91	-0.17	-1.13	0.72	0.87	1	0.91	-3.14	-8.81	0.00273	0.02	1		PREDICTED: von Willebrand factor A domain-containing protein 5B1-like [Salmo salar]
contig_0104128	contig_0104128	1..458	3.24	-0.18	-1.13	0.7	0.86	1	3.24	-2.03	-4.08	0.00456	0.03	1		PREDICTED: trichohyalin-like [Salmo salar]
contig_0117991	contig_0117991	1..387	4.24	-0.18	-1.13	0.68	0.85	1	4.24	-2.17	-4.51	0.0022	0.01	1		PREDICTED: MICAL-like protein 1 isoform X1 [Salmo salar]
contig_0119575	contig_0119575	1..329	5.47	-0.18	-1.13	0.67	0.84	1	5.47	-2.31	-4.95	0.00108	0.00849	1		not available
contig_0157569	contig_0157569	1..329	4.02	-0.17	-1.13	0.72	0.87	1	4.02	-3.14	-8.81	0.00273	0.02	1		not available
contig_0018286	contig_0018286	1..1732	0.09	-0.19	-1.14	0.88	NaN	1	0.91	3.43	10.81	9.73e-05	0.00116	1		FGF2 [Salmo salar]
contig_0040137	contig_0040137	1..1727	0.09	-0.19	-1.14	0.88	NaN	1	0.47	2.5	5.64	0.00684	0.04	1		PREDICTED: B-cell receptor CD22-like [Salmo salar]
contig_0097523	contig_0097523	1..1464	0.11	-0.19	-1.14	0.88	NaN	1	0.56	2.5	5.64	0.00684	0.04	1		PREDICTED: C2 calcium-dependent domain-containing protein 4C-like [Salmo salar]
contig_0131657	contig_0131657	1..237	0.67	-0.19	-1.14	0.88	NaN	1	3.19	2.38	5.21	0.01	0.05	1		not available
contig_0183100	contig_0183100	1..351	0.45	-0.19	-1.14	0.88	NaN	1	2.16	2.38	5.21	0.01	0.05	1		PREDICTED: cell division cycle-associated protein 2-like [Salmo salar]
contig_0022263	contig_0022263	1..820	2.13	-0.2	-1.15	0.64	0.82	1	2.13	-2.26	-4.8	0.00137	0.01	1		not available
contig_0080175	contig_0080175	1..1331	0.36	-0.2	-1.15	0.8	NaN	1	1.33	2.05	4.15	0.000361	0.00349	1		PREDICTED: C-X-C chemokine receptor type 4-like [Salmo salar]
contig_0085498	contig_0085498	1..207	1.53	-0.2	-1.15	0.83	NaN	1	6.7	2.28	4.86	0.000798	0.00662	1		PREDICTED: BCL2/adenovirus E1B 19 kDa protein-interacting protein 2-like [Salmo salar]
contig_0098468	contig_0098468	1..3345	0.52	-0.2	-1.15	0.64	0.82	1	0.52	-2.98	-7.88	0.000639	0.00552	1		not available
contig_0124112	contig_0124112	1..1468	0.87	-0.2	-1.15	0.68	0.85	1	0.87	-2.12	-4.35	0.00719	0.04	1		PREDICTED: SH3 domain-binding protein 4 [Salmo salar]
contig_0125137	contig_0125137	1..262	33.54	-0.2	-1.15	0.34	0.61	1	33.54	-5.3	-39.53	1.91e-10	9.87e-09	5.09e-05		PREDICTED: keratin-associated protein 4-3-like [Salmo salar]
contig_0134600	contig_0134600	1..808	3.73	-0.2	-1.15	0.56	0.78	1	3.73	-2.22	-4.64	4.48e-05	0.000602	1		PREDICTED: transcription factor 4-like, partial [Salmo salar]
contig_0135876	contig_0135876	1..819	1.75	-0.2	-1.15	0.67	0.84	1	1.75	-2.29	-4.89	0.00345	0.02	1		PREDICTED: zinc finger and BTB domain-containing protein 11-like [Salmo salar]
contig_0138620	contig_0138620	1..1702	0.75	-0.2	-1.15	0.68	0.85	1	0.75	-2.12	-4.35	0.00719	0.04	1		PREDICTED: activin receptor type-2A-like [Salmo salar]
contig_0147496	contig_0147496	1..308	7.73	-0.2	-1.15	0.59	0.8	1	7.73	-2.23	-4.7	0.000235	0.00244	1		PREDICTED: apoptotic protease-activating factor 1-like isoform X3 [Salmo salar]
contig_0163861	contig_0163861	1..1695	0.66	-0.2	-1.15	0.7	0.86	1	0.66	-2.89	-7.41	0.00617	0.03	1		PREDICTED: AMME syndrome candidate gene 1 protein-like [Salmo salar]
contig_0084173	contig_0084173	1..5067	0.59	-0.22	-1.16	0.54	0.76	1	0.59	-2.19	-4.56	5.58e-05	0.000728	1		PREDICTED: glial fibrillary acidic protein-like [Salmo salar]
contig_0049717	contig_0049717	1..2301	1.75	-0.22	-1.17	0.44	0.69	1	1.75	-2.34	-5.08	2.14e-06	4.37e-05	0.57		PREDICTED: transposon Tf2-1 polyprotein [Salmo salar]
contig_0056470	contig_0056470	1..1302	3.42	-0.23	-1.17	0.4	0.66	1	3.42	-2.25	-4.75	1.12e-06	2.48e-05	0.3		PREDICTED: doublesex- and mab-3-related transcription factor 3a-like, partial [Salmo salar]
contig_0036116	contig_0036116	1..293	6.68	-0.24	-1.18	0.56	0.78	1	6.68	-2.43	-5.38	0.000545	0.00485	1		PREDICTED: follistatin-related protein 3-like isoform X1 [Salmo salar]
contig_0042461	contig_0042461	1..256	4.76	-0.23	-1.18	0.64	0.82	1	4.76	-2.06	-4.17	0.00925	0.05	1		not available
contig_0062144	contig_0062144	1..1392	2.17	-0.24	-1.18	0.49	0.73	1	2.17	-2.38	-5.22	2.73e-05	0.000397	1		not available
contig_0074133	contig_0074133	1..349	3.49	-0.23	-1.18	0.64	0.82	1	3.49	-2.46	-5.5	0.00558	0.03	1		PREDICTED: serine--tRNA ligase, mitochondrial isoform X2 [Salmo salar]
contig_0076902	contig_0076902	1..1363	1.79	-0.24	-1.18	0.54	0.76	1	1.79	-2.07	-4.21	0.000314	0.00311	1		not available
contig_0085528	contig_0085528	1..2740	0.77	-0.24	-1.18	0.55	0.77	1	0.77	-2.54	-5.81	0.00028	0.00282	1		UPF0527 membrane protein [Salmo salar]
contig_0087366	contig_0087366	1..248	4.27	-0.24	-1.18	0.66	0.83	1	4.27	-2.82	-7.06	0.00767	0.04	1		PREDICTED: NK-tumor recognition protein [Salmo salar]
contig_0089277	contig_0089277	1..479	4.09	-0.24	-1.18	0.56	0.78	1	4.09	-2.43	-5.38	0.000545	0.00485	1		not available
contig_0095651	contig_0095651	1..1937	1.09	-0.24	-1.18	0.55	0.77	1	1.09	-2.85	-7.23	0.000197	0.00211	1		PREDICTED: clathrin heavy chain 1-like isoform X4 [Salmo salar]
contig_0127078	contig_0127078	1..3632	0.96	-0.24	-1.18	0.47	0.72	1	0.96	-2.43	-5.38	6.54e-06	0.000116	1		PREDICTED: uncharacterized protein LOC106572570 [Salmo salar]
contig_0155773	contig_0155773	1..1279	1.78	-0.24	-1.18	0.54	0.77	1	6.36	2.01	4.04	4.44e-13	3.68e-11	1.18e-07		PREDICTED: endothelial cell-specific molecule 1 [Salmo salar]
contig_0181318	contig_0181318	1..831	1.47	-0.23	-1.18	0.64	0.82	1	1.47	-2.46	-5.5	0.00558	0.03	1		not available
contig_0187294	contig_0187294	1..1855	0.66	-0.23	-1.18	0.64	0.82	1	0.66	-2.46	-5.5	0.00558	0.03	1		PREDICTED: fibroblast growth factor 4B-like [Salmo salar]
contig_0079441	contig_0079441	1..246	9.68	-0.25	-1.19	0.51	0.75	1	9.68	-2.04	-4.12	0.000395	0.00376	1		T cell receptor alpha, partial [Salmo salar]
contig_0084582	contig_0084582	1..1002	1.64	-0.25	-1.19	0.58	0.79	1	1.64	-2.17	-4.51	0.0022	0.01	1		Transposable element Tc1 transposase [Salmo salar]
contig_0122073	contig_0122073	1..1956	0.76	-0.26	-1.19	0.59	0.79	1	0.76	-2.03	-4.08	0.00456	0.03	1		PREDICTED: sacsin-like isoform X2 [Salmo salar]
contig_0151056	contig_0151056	1..1133	1.59	-0.25	-1.19	0.57	0.78	1	1.59	-3.02	-8.12	0.000524	0.00471	1		PREDICTED: leucine-rich repeats and immunoglobulin-like domains protein 2 isoform X2 [Salmo salar]
contig_0037312	contig_0037312	1..3358	0.79	-0.26	-1.2	0.48	0.72	1	0.79	-2.19	-4.58	0.000127	0.00146	1		PREDICTED: rab11 family-interacting protein 3-like isoform X3 [Salmo salar]
contig_0039005	contig_0039005	1..623	9.86	-0.27	-1.2	0.27	0.54	1	9.86	-4.07	-16.82	7.55e-10	3.45e-08	0.000201		collagen Type XI Alpha2 [Salmo salar]
contig_0056708	contig_0056708	1..473	2.8	-0.26	-1.2	0.59	0.8	1	2.8	-3.14	-8.81	0.00273	0.02	1		PREDICTED: collagen alpha-1(VI) chain-like [Salmo salar]
contig_0093247	contig_0093247	1..2165	0.61	-0.26	-1.2	0.59	0.8	1	0.61	-2.58	-5.98	0.00351	0.02	1		PREDICTED: membrane-associated guanylate kinase, WW and PDZ domain-containing protein 2-like [Salmo salar]
contig_0119535	contig_0119535	1..1019	3.32	-0.26	-1.2	0.44	0.69	1	3.32	-3.93	-15.26	4.24e-06	7.93e-05	1		EGFR-coamplified and overexpressed protein precursor [Salmo salar]
contig_0131348	contig_0131348	1..1264	1.05	-0.26	-1.2	0.59	0.8	1	1.05	-3.14	-8.81	0.00273	0.02	1		FGF2 [Salmo salar]
contig_0139784	contig_0139784	1..645	2.05	-0.26	-1.2	0.59	0.8	1	2.05	-3.14	-8.81	0.00273	0.02	1		Transposable element Tcb1 transposase [Salmo salar]
contig_0241955	contig_0241955	1..214	2.72	-0.27	-1.2	0.71	0.86	1	23.28	3.26	9.59	3.72e-11	2.22e-09	9.91e-06		not available
contig_0007246	contig_0007246	1..367	3.17	-0.27	-1.21	0.61	0.8	1	3.17	-2.96	-7.76	0.005	0.03	1		not available
contig_0028703	contig_0028703	1..1898	1.14	-0.28	-1.21	0.49	0.73	1	1.14	-2.32	-4.98	0.000354	0.00343	1		PREDICTED: E3 ubiquitin-protein ligase listerin isoform X1 [Salmo salar]
contig_0047841	contig_0047841	1..362	4.39	-0.28	-1.21	0.54	0.77	1	4.39	-3.4	-10.56	0.00109	0.00852	1		SPATA5 [Salmo salar]
contig_0049333	contig_0049333	1..1256	0.8	-0.28	-1.21	0.62	0.81	1	0.8	-2.75	-6.71	0.00958	0.05	1		Deoxyribonuclease gamma precursor [Salmo salar]
contig_0071557	contig_0071557	1..385	3.02	-0.27	-1.21	0.61	0.8	1	3.02	-3.88	-14.72	0.00598	0.03	1		olfactory receptor family C subfamily 4 member 9 [Salmo salar]
contig_0106158	contig_0106158	1..853	1.37	-0.27	-1.21	0.61	0.8	1	1.37	-2.96	-7.76	0.005	0.03	1		not available
contig_0107454	contig_0107454	1..1479	0.79	-0.27	-1.21	0.61	0.8	1	0.79	-2.4	-5.27	0.00709	0.04	1		Transposable element Tcb1 transposase [Salmo salar]
contig_0112980	contig_0112980	1..1071	1.48	-0.28	-1.21	0.54	0.77	1	1.48	-2.84	-7.17	0.00118	0.0091	1		reverse transcriptase-like protein [Salmo salar]
contig_0120868	contig_0120868	1..2218	0.53	-0.27	-1.21	0.61	0.8	1	0.53	-2.4	-5.27	0.00709	0.04	1		PREDICTED: rho GTPase-activating protein 10-like [Salmo salar]
contig_0132226	contig_0132226	1..1625	0.62	-0.28	-1.21	0.62	0.81	1	0.62	-2.75	-6.71	0.00958	0.05	1		PREDICTED: uncharacterized protein LOC106591448, partial [Salmo salar]
contig_0009047	contig_0009047	1..512	3.62	-0.29	-1.22	0.5	0.74	1	3.62	-2.09	-4.26	0.00143	0.01	1		not available
contig_0054476	contig_0054476	1..1388	3.62	-0.28	-1.22	0.28	0.56	1	3.62	-5.98	-63.27	1.57e-05	0.000246	1		PREDICTED: UDP-N-acetylglucosamine transporter-like isoform X3 [Salmo salar]
contig_0063785	contig_0063785	1..1115	6.12	-0.29	-1.22	0.21	0.48	1	6.12	-2.05	-4.14	2.91e-09	1.18e-07	0.000775		PREDICTED: dematin isoform X5 [Salmo salar]
contig_0087424	contig_0087424	1..1019	1.4	-0.29	-1.22	0.55	0.77	1	1.4	-3.25	-9.51	0.00187	0.01	1		PREDICTED: golgin subfamily B member 1-like isoform X3 [Salmo salar]
contig_0103654	contig_0103654	1..2330	1.34	-0.29	-1.22	0.4	0.66	1	1.34	-3.1	-8.57	6.48e-06	0.000115	1		PREDICTED: uncharacterized protein LOC106600349 isoform X2 [Salmo salar]
contig_0137010	contig_0137010	1..1764	1.62	-0.29	-1.22	0.43	0.68	1	1.62	-2.5	-5.64	3.28e-05	0.000462	1		PREDICTED: nephronectin-like isoform X3 [Salmo salar]
contig_0045157	contig_0045157	1..2234	3.79	-0.3	-1.23	0.17	0.42	1	3.79	-2.03	-4.08	8.51e-11	4.71e-09	2.27e-05		PREDICTED: uncharacterized protein LOC106600457 [Salmo salar]
contig_0045398	contig_0045398	1..4341	2.71	-0.29	-1.23	0.13	0.36	1	2.71	-2.07	-4.21	4.7e-14	4.49e-12	1.25e-08		PREDICTED: adhesion G-protein coupled receptor F2-like [Salmo salar]
contig_0049350	contig_0049350	1..747	3.19	-0.3	-1.23	0.43	0.69	1	3.19	-2.04	-4.12	0.000395	0.00376	1		PREDICTED: protein SCAI-like [Salmo salar]
contig_0062474	contig_0062474	1..1614	1.31	-0.3	-1.23	0.47	0.71	1	1.31	-2.06	-4.18	0.000744	0.00625	1		PREDICTED: neurotrophin receptor-interacting factor 1-like isoform X1 [Salmo salar]
contig_0085759	contig_0085759	1..346	3.67	-0.3	-1.23	0.56	0.78	1	3.67	-2.12	-4.35	0.00719	0.04	1		PREDICTED: mucin-2-like isoform X1 [Salmo salar]
contig_0089740	contig_0089740	1..784	10.4	-0.3	-1.23	0.17	0.42	1	10.4	-2.92	-7.56	6.04e-13	4.89e-11	1.61e-07		PREDICTED: uncharacterized protein LOC106578354 [Salmo salar]
contig_0103122	contig_0103122	1..1144	1.11	-0.3	-1.23	0.56	0.78	1	1.11	-2.12	-4.35	0.00719	0.04	1		not available
contig_0122044	contig_0122044	1..510	2.49	-0.3	-1.23	0.56	0.78	1	2.49	-4	-16.05	0.00447	0.03	1		not available
contig_0141173	contig_0141173	1..596	3.29	-0.3	-1.23	0.47	0.71	1	3.29	-2.43	-5.38	0.000545	0.00485	1		PREDICTED: protein KRI1 homolog [Salmo salar]
contig_0017527	contig_0017527	1..910	1.22	-0.31	-1.24	0.56	0.78	1	1.22	-2.33	-5.03	0.00904	0.04	1		not available
contig_0059494	contig_0059494	1..423	6.26	-0.31	-1.24	0.41	0.67	1	6.26	-2.03	-4.08	0.000214	0.00226	1		hypothetical protein [Salmo salar]
contig_0075443	contig_0075443	1..902	1.23	-0.31	-1.24	0.56	0.78	1	1.23	-3.81	-14.06	0.00696	0.04	1		PREDICTED: transcription factor SOX-6 [Salmo salar]
contig_0079276	contig_0079276	1..979	1.57	-0.31	-1.24	0.51	0.75	1	1.57	-2.08	-4.22	0.00357	0.02	1		not available
contig_0080049	contig_0080049	1..2352	0.95	-0.31	-1.24	0.44	0.69	1	0.95	-2.35	-5.11	0.000283	0.00284	1		PREDICTED: uncharacterized mitochondrial protein AtMg00860-like [Salmo salar]
contig_0144299	contig_0144299	1..947	1.62	-0.31	-1.24	0.51	0.75	1	1.62	-2.08	-4.22	0.00357	0.02	1		PREDICTED: formin-2-like [Salmo salar]
contig_0094311	contig_0094311	1..502	4.11	-0.32	-1.25	0.44	0.69	1	4.11	-2.03	-4.08	0.000942	0.0076	1		PREDICTED: homeobox protein cut-like 1 isoform X1 [Salmo salar]
contig_0097389	contig_0097389	1..1453	1.79	-0.33	-1.25	0.39	0.65	1	1.79	-2.83	-7.12	4.31e-05	0.000583	1		PREDICTED: regulatory factor X-associated protein [Salmo salar]
contig_0151976	contig_0151976	1..595	2.31	-0.32	-1.25	0.52	0.75	1	2.31	-3.2	-9.16	0.00225	0.02	1		not available
contig_0161764	contig_0161764	1..1877	1.24	-0.32	-1.25	0.41	0.67	1	1.24	-2.2	-4.6	0.000295	0.00294	1		not available
contig_0031888	contig_0031888	1..314	3.88	-0.33	-1.26	0.52	0.75	1	3.88	-2.06	-4.17	0.00925	0.05	1		not available
contig_0037612	contig_0037612	1..1172	1.04	-0.33	-1.26	0.52	0.75	1	1.04	-3.02	-8.11	0.00406	0.02	1		PREDICTED: inositol hexakisphosphate and diphosphoinositol-pentakisphosphate kinase 1 isoform X16 [Salmo salar]
contig_0063471	contig_0063471	1..1134	1.07	-0.33	-1.26	0.52	0.75	1	1.07	-2.06	-4.17	0.00925	0.05	1		not available
contig_0069469	contig_0069469	1..687	5.7	-0.34	-1.26	0.25	0.52	1	5.7	-2.07	-4.19	9.03e-06	0.000153	1		PREDICTED: tetratricopeptide repeat protein 28-like [Salmo salar]
contig_0120797	contig_0120797	1..990	1.23	-0.33	-1.26	0.52	0.75	1	1.23	-2.46	-5.5	0.00558	0.03	1		Myelin protein zero-like protein 2 precursor [Salmo salar]
contig_0002603	contig_0002603	1..631	10.99	-0.35	-1.27	0.14	0.38	1	10.99	-2.35	-5.08	2.62e-10	1.32e-08	6.98e-05		PREDICTED: protein NLRC3-like, partial [Salmo salar]
contig_0036392	contig_0036392	1..465	0.57	-0.34	-1.27	0.74	NaN	1	2.17	2.08	4.23	0.00557	0.03	1		PREDICTED: hexokinase-1-like [Salmo salar]
contig_0037257	contig_0037257	1..1759	0.99	-0.34	-1.27	0.44	0.69	1	0.99	-4.46	-22.04	0.00144	0.01	1		PREDICTED: zinc finger protein ZPR1 isoform X4 [Salmo salar]
contig_0060049	contig_0060049	1..238	1.11	-0.34	-1.27	0.74	NaN	1	4.24	2.08	4.23	0.00557	0.03	1		PREDICTED: NADPH oxidase organizer 1-like [Salmo salar]
contig_0096874	contig_0096874	1..1299	1.55	-0.34	-1.27	0.41	0.67	1	1.55	-2.21	-4.62	0.000705	0.00598	1		PREDICTED: disks large homolog 1 isoform X12 [Salmo salar]
contig_0103680	contig_0103680	1..887	3.76	-0.35	-1.27	0.31	0.58	1	3.76	-2.07	-4.21	3.39e-05	0.000475	1		not available
contig_0126379	contig_0126379	1..360	4.85	-0.34	-1.27	0.44	0.69	1	4.85	-2.01	-4.02	0.00231	0.02	1		PREDICTED: LOW QUALITY PROTEIN: protocadherin Fat 1 [Salmo salar]
contig_0236524	contig_0236524	1..1548	0.17	-0.34	-1.27	0.74	NaN	1	1.18	2.94	7.65	3.72e-05	0.000515	1		PREDICTED: dihydropyrimidinase-related protein 3 isoform X3 [Salmo salar]
contig_0006479	contig_0006479	1..285	3.71	-0.35	-1.28	0.52	0.75	1	3.71	-2.82	-7.06	0.00767	0.04	1		PREDICTED: sterol 26-hydroxylase, mitochondrial-like [Salmo salar]
contig_0015605	contig_0015605	1..1201	1.1	-0.35	-1.28	0.48	0.72	1	1.1	-2.18	-4.53	0.00561	0.03	1		PREDICTED: centrosomal protein of 192 kDa-like isoform X2 [Salmo salar]
contig_0056623	contig_0056623	1..659	1.61	-0.35	-1.28	0.52	0.75	1	1.61	-2.82	-7.06	0.00767	0.04	1		PREDICTED: zinc finger CCCH domain-containing protein 11A-like isoform X1 [Salmo salar]
contig_0071216	contig_0071216	1..437	2.42	-0.35	-1.28	0.52	0.75	1	2.42	-2.82	-7.06	0.00767	0.04	1		hypothetical protein [Salmo salar]
contig_0077991	contig_0077991	1..1808	1.17	-0.35	-1.28	0.39	0.65	1	1.17	-3.81	-14.07	0.000221	0.00232	1		PREDICTED: zinc finger protein 2-like [Salmo salar]
contig_0090247	contig_0090247	1..1141	0.93	-0.35	-1.28	0.52	0.75	1	0.93	-2.82	-7.06	0.00767	0.04	1		not available
contig_0091654	contig_0091654	1..402	3.95	-0.35	-1.28	0.44	0.69	1	3.95	-2.13	-4.37	0.0028	0.02	1		PREDICTED: N-terminal EF-hand calcium-binding protein 1-like [Salmo salar]
contig_0107860	contig_0107860	1..602	1.76	-0.35	-1.28	0.52	0.75	1	1.76	-2.82	-7.06	0.00767	0.04	1		not available
contig_0114579	contig_0114579	1..236	5.61	-0.35	-1.28	0.48	0.72	1	5.61	-2.18	-4.53	0.00561	0.03	1		PREDICTED: ATP-dependent RNA helicase DDX24 isoform X2 [Salmo salar]
contig_0117066	contig_0117066	1..2107	0.75	-0.35	-1.28	0.44	0.69	1	0.75	-2.44	-5.43	0.0017	0.01	1		PREDICTED: uncharacterized protein LOC106609062 isoform X1 [Salmo salar]
contig_0121007	contig_0121007	1..395	3.35	-0.35	-1.28	0.48	0.72	1	3.35	-2.18	-4.53	0.00561	0.03	1		PREDICTED: rab-like protein 2B [Salmo salar]
contig_0124729	contig_0124729	1..2481	0.53	-0.35	-1.28	0.48	0.72	1	0.53	-3.14	-8.81	0.00273	0.02	1		PREDICTED: hypermethylated in cancer 1 protein-like isoform X3 [Salmo salar]
contig_0127640	contig_0127640	1..1567	1.01	-0.35	-1.28	0.44	0.69	1	1.01	-2.13	-4.37	0.0028	0.02	1		PREDICTED: U3 small nucleolar ribonucleoprotein protein IMP4-like isoform X1 [Salmo salar]
contig_0019563	contig_0019563	1..2318	1.07	-0.37	-1.29	0.34	0.61	1	1.07	-2.11	-4.3	0.00025	0.00256	1		not available
contig_0025445	contig_0025445	1..755	1.89	-0.37	-1.29	0.44	0.69	1	1.89	-2.69	-6.46	0.00224	0.02	1		PREDICTED: uncharacterized protein LOC106577159 [Salmo salar]
contig_0047188	contig_0047188	1..3278	0.52	-0.37	-1.29	0.41	0.67	1	0.52	-2.53	-5.79	0.00108	0.00849	1		PREDICTED: apoptosis-inducing factor 3-like isoform X1 [Salmo salar]
contig_0051437	contig_0051437	1..820	4.78	-0.37	-1.29	0.21	0.48	1	4.78	-2.44	-5.43	2e-06	4.12e-05	0.53		not available
contig_0075046	contig_0075046	1..589	3.33	-0.37	-1.29	0.39	0.65	1	3.33	-2.43	-5.38	0.000545	0.00485	1		PREDICTED: teashirt homolog 1-like isoform X2 [Salmo salar]
contig_0079379	contig_0079379	1..275	5.2	-0.37	-1.29	0.44	0.69	1	5.2	-4.17	-18.05	0.00298	0.02	1		PREDICTED: IgGFc-binding protein-like [Salmo salar]
contig_0014804	contig_0014804	1..629	1.85	-0.38	-1.3	0.48	0.72	1	1.85	-2.4	-5.27	0.00709	0.04	1		Transposable element Tcb1 transposase [Salmo salar]
contig_0039772	contig_0039772	1..1247	1.44	-0.38	-1.3	0.38	0.65	1	1.44	-2.05	-4.14	0.00181	0.01	1		PREDICTED: neurotrophin receptor-interacting factor 1-like isoform X1 [Salmo salar]
contig_0041092	contig_0041092	1..1870	1.1	-0.38	-1.3	0.36	0.63	1	1.1	-2.03	-4.08	0.000942	0.0076	1		vacuolar protein sorting 52 [Salmo salar]
contig_0044017	contig_0044017	1..3024	0.39	-0.38	-1.3	0.48	0.72	1	0.39	-2.96	-7.76	0.005	0.03	1		PREDICTED: uncharacterized protein LOC106600457 [Salmo salar]
contig_0064324	contig_0064324	1..1660	1.08	-0.38	-1.3	0.38	0.65	1	1.08	-2.31	-4.95	0.00108	0.00849	1		PREDICTED: progressive ankylosis protein homolog isoform X2 [Salmo salar]
contig_0096829	contig_0096829	1..1795	1.5	-0.38	-1.3	0.3	0.58	1	1.5	-2.06	-4.16	0.00017	0.00187	1		PREDICTED: inositol 1,4,5-trisphosphate receptor type 2 isoform X1 [Salmo salar]
contig_0111754	contig_0111754	1..1194	1.95	-0.38	-1.3	0.34	0.61	1	1.95	-2.01	-4.03	0.000498	0.00451	1		PREDICTED: MBT domain-containing protein 1-like isoform X3 [Salmo salar]
contig_0113725	contig_0113725	1..2383	0.76	-0.38	-1.3	0.38	0.65	1	0.76	-3.02	-8.12	0.000524	0.00471	1		not available
contig_0128030	contig_0128030	1..893	2.31	-0.38	-1.3	0.36	0.63	1	2.31	-2.5	-5.67	0.000349	0.00339	1		PREDICTED: aminoacyl tRNA synthase complex-interacting multifunctional protein 1 isoform X1 [Salmo salar]
contig_0006491	contig_0006491	1..1205	2.77	-0.39	-1.31	0.26	0.54	1	2.77	-2.36	-5.13	1.23e-05	0.000199	1		PREDICTED: zinc finger BED domain-containing protein 4-like [Salmo salar]
contig_0041597	contig_0041597	1..2687	1.34	-0.38	-1.31	0.25	0.52	1	1.34	-2.18	-4.54	1.15e-05	0.000189	1		PREDICTED: serine/threonine-protein kinase DCLK2-like [Salmo salar]
contig_0061233	contig_0061233	1..3517	2.21	-0.39	-1.31	0.08	0.29	1	2.21	-2.06	-4.17	2.85e-10	1.43e-08	7.59e-05		PREDICTED: uncharacterized protein LOC106603467 [Salmo salar]
contig_0081131	contig_0081131	1..988	1.29	-0.39	-1.31	0.44	0.69	1	1.29	-2.52	-5.74	0.00441	0.03	1		PREDICTED: collagen alpha-2(XI) chain-like isoform X5 [Salmo salar]
contig_0083565	contig_0083565	1..784	1.96	-0.39	-1.31	0.41	0.67	1	1.96	-3.35	-10.21	0.0013	0.00984	1		PREDICTED: WD repeat domain phosphoinositide-interacting protein 3 isoform X3 [Salmo salar]
contig_0095546	contig_0095546	1..1501	0.85	-0.39	-1.31	0.44	0.69	1	0.85	-2.12	-4.35	0.00719	0.04	1		PREDICTED: clathrin heavy chain 1-like isoform X4 [Salmo salar]
contig_0122695	contig_0122695	1..1108	1.15	-0.39	-1.31	0.44	0.69	1	1.15	-2.52	-5.74	0.00441	0.03	1		PREDICTED: cysteine/serine-rich nuclear protein 1-like [Salmo salar]
contig_0039992	contig_0039992	1..1357	0.74	-0.4	-1.32	0.48	0.72	1	0.74	-3.67	-12.73	0.00959	0.05	1		PREDICTED: gastrula zinc finger protein XlCGF57.1-like isoform X33 [Salmo salar]
contig_0050845	contig_0050845	1..1260	0.8	-0.4	-1.32	0.48	0.72	1	0.8	-2.75	-6.71	0.00958	0.05	1		vacuolar protein sorting-associated protein 52-like protein [Salmo salar]
contig_0053902	contig_0053902	1..803	4.09	-0.4	-1.32	0.25	0.52	1	4.09	-2.69	-6.47	6.32e-06	0.000112	1		hypothetical protein [Salmo salar]
contig_0056056	contig_0056056	1..1308	1.46	-0.4	-1.32	0.36	0.62	1	1.46	-2.13	-4.38	0.00113	0.00879	1		PREDICTED: moesin-like [Salmo salar]
contig_0070220	contig_0070220	1..333	3.02	-0.4	-1.32	0.48	0.72	1	3.02	-2.75	-6.71	0.00958	0.05	1		not available
contig_0119370	contig_0119370	1..1379	0.73	-0.4	-1.32	0.48	0.72	1	0.73	-2.75	-6.71	0.00958	0.05	1		not available
contig_0120254	contig_0120254	1..1720	1.48	-0.4	-1.32	0.3	0.58	1	1.48	-2.14	-4.4	0.000199	0.00212	1		not available
contig_0170316	contig_0170316	1..1245	0.81	-0.4	-1.32	0.48	0.72	1	0.81	-2.75	-6.71	0.00958	0.05	1		PREDICTED: transmembrane protein 179B-like isoform X1 [Salmo salar]
contig_0003343	contig_0003343	1..883	2.7	-0.41	-1.33	0.3	0.57	1	2.7	-2.23	-4.7	0.000235	0.00244	1		PREDICTED: TNF receptor-associated factor 2 isoform X2 [Salmo salar]
contig_0057695	contig_0057695	1..994	1.76	-0.41	-1.33	0.36	0.62	1	1.76	-2.01	-4.02	0.00231	0.02	1		not available
contig_0069616	contig_0069616	1..2733	0.77	-0.42	-1.33	0.32	0.59	1	0.77	-2.28	-4.86	0.000444	0.00413	1		not available
contig_0085115	contig_0085115	1..1540	0.89	-0.41	-1.33	0.41	0.67	1	0.89	-2.23	-4.71	0.00439	0.03	1		PREDICTED: uncharacterized protein LOC106609103 isoform X4 [Salmo salar]
contig_0090428	contig_0090428	1..3264	0.65	-0.42	-1.33	0.32	0.59	1	0.65	-2.06	-4.18	0.000744	0.00625	1		PREDICTED: aspartyl/asparaginyl beta-hydroxylase-like isoform X2 [Salmo salar]
contig_0100885	contig_0100885	1..1591	1.1	-0.41	-1.33	0.36	0.62	1	1.1	-3.54	-11.61	0.000653	0.00562	1		PREDICTED: uncharacterized protein LOC106600457 [Salmo salar]
contig_0102997	contig_0102997	1..2132	0.65	-0.41	-1.33	0.41	0.67	1	0.65	-2.64	-6.22	0.0028	0.02	1		not available
contig_0107310	contig_0107310	1..512	3.41	-0.41	-1.33	0.36	0.62	1	3.41	-2.01	-4.02	0.00231	0.02	1		PREDICTED: neuropilin-2-like, partial [Salmo salar]
contig_0119591	contig_0119591	1..1423	1.49	-0.42	-1.33	0.32	0.59	1	1.49	-2.06	-4.18	0.000744	0.00625	1		PREDICTED: metallophosphoesterase 1-like isoform X3 [Salmo salar]
contig_0005159	contig_0005159	1..904	1.23	-0.42	-1.34	0.44	0.69	1	1.23	-3.81	-14.06	0.00696	0.04	1		UPF0527 membrane protein [Salmo salar]
contig_0030752	contig_0030752	1..1526	1.46	-0.43	-1.34	0.3	0.57	1	1.46	-2.13	-4.39	0.000467	0.0043	1		PREDICTED: tRNA:m(4)X modification enzyme TRM13 homolog isoform X1 [Salmo salar]
contig_0045344	contig_0045344	1..518	4.29	-0.43	-1.34	0.3	0.57	1	4.29	-2.13	-4.39	0.000467	0.0043	1		not available
contig_0052909	contig_0052909	1..2847	0.39	-0.42	-1.34	0.44	0.69	1	0.39	-2.33	-5.03	0.00904	0.04	1		not available
contig_0064244	contig_0064244	1..1159	0.96	-0.42	-1.34	0.44	0.69	1	0.96	-2.89	-7.41	0.00617	0.03	1		not available
contig_0065603	contig_0065603	1..515	4.83	-0.42	-1.34	0.28	0.56	1	4.83	-2.11	-4.3	0.00025	0.00256	1		PREDICTED: ankyrin repeat and SOCS box protein 15 [Salmo salar]
contig_0078631	contig_0078631	1..1358	2.38	-0.42	-1.34	0.23	0.5	1	2.38	-2.89	-7.41	5.53e-06	0.0001	1		not available
contig_0114419	contig_0114419	1..221	6.71	-0.42	-1.34	0.38	0.64	1	6.71	-2.34	-5.07	0.00272	0.02	1		PREDICTED: spore wall protein 2-like [Salmo salar]
contig_0137990	contig_0137990	1..1424	0.78	-0.42	-1.34	0.44	0.69	1	0.78	-2.89	-7.41	0.00617	0.03	1		not available
contig_0143754	contig_0143754	1..1013	1.1	-0.42	-1.34	0.44	0.69	1	1.1	-2.89	-7.41	0.00617	0.03	1		PREDICTED: brefeldin A-inhibited guanine nucleotide-exchange protein 2-like [Salmo salar]
contig_0018767	contig_0018767	1..2200	0.89	-0.43	-1.35	0.31	0.59	1	0.89	-2.17	-4.5	0.00089	0.00724	1		PREDICTED: MAP/microtubule affinity-regulating kinase 3-like isoform X13 [Salmo salar]
contig_0041823	contig_0041823	1..346	11.32	-0.44	-1.35	0.15	0.39	1	11.32	-2.59	-6.03	1.28e-06	2.79e-05	0.34		PREDICTED: zinc finger protein 431-like isoform X42 [Salmo salar]
contig_0118999	contig_0118999	1..1346	1.46	-0.43	-1.35	0.31	0.59	1	1.46	-2.43	-5.38	0.000545	0.00485	1		PREDICTED: sodium-coupled neutral amino acid transporter 3-like isoform X2 [Salmo salar]
contig_0004061	contig_0004061	1..1543	2.37	-0.44	-1.36	0.19	0.45	1	2.37	-2.49	-5.62	3.52e-06	6.73e-05	0.94		PREDICTED: ral GTPase-activating protein subunit beta-like isoform X1 [Salmo salar]
contig_0018670	contig_0018670	1..1563	1.08	-0.45	-1.36	0.33	0.59	1	1.08	-2.53	-5.79	0.00108	0.00849	1		PREDICTED: tyrosine-protein phosphatase non-receptor type 3-like [Salmo salar]
contig_0021310	contig_0021310	1..1003	1.21	-0.44	-1.36	0.41	0.67	1	1.21	-2.46	-5.5	0.00558	0.03	1		Deoxyribonuclease gamma precursor [Salmo salar]
contig_0021691	contig_0021691	1..2965	1.36	-0.44	-1.36	0.14	0.38	1	1.36	-2.34	-5.08	2.14e-06	4.37e-05	0.57		Transposable element Tcb1 transposase [Salmo salar]
contig_0022622	contig_0022622	1..1596	0.76	-0.44	-1.36	0.41	0.67	1	0.76	-2.06	-4.17	0.00925	0.05	1		PREDICTED: uncharacterized protein K02A2.6 [Salmo salar]
contig_0026279	contig_0026279	1..1189	1.02	-0.44	-1.36	0.41	0.67	1	1.02	-2.46	-5.5	0.00558	0.03	1		PREDICTED: beta-2-glycoprotein 1-like [Salmo salar]
contig_0036610	contig_0036610	1..554	7.26	-0.44	-1.36	0.14	0.38	1	7.26	-2.63	-6.19	8.62e-07	1.96e-05	0.23		homeobox protein HoxC4ba [Salmo salar]
contig_0042154	contig_0042154	1..2213	0.55	-0.44	-1.36	0.41	0.67	1	0.55	-2.06	-4.17	0.00925	0.05	1		PREDICTED: DNA-directed RNA polymerase II subunit RPB1 [Salmo salar]
contig_0060364	contig_0060364	1..863	1.41	-0.44	-1.36	0.41	0.67	1	1.41	-2.06	-4.17	0.00925	0.05	1		not available
contig_0070154	contig_0070154	1..863	1.41	-0.44	-1.36	0.41	0.67	1	1.41	-2.06	-4.17	0.00925	0.05	1		PREDICTED: disabled homolog 2-interacting protein-like isoform X7 [Salmo salar]
contig_0070874	contig_0070874	1..2889	1.01	-0.45	-1.36	0.22	0.49	1	1.01	-2.01	-4.04	0.000117	0.00137	1		PREDICTED: semaphorin-4B-like [Salmo salar]
contig_0091577	contig_0091577	1..1319	1.28	-0.45	-1.36	0.33	0.59	1	1.28	-2.22	-4.66	0.00173	0.01	1		PREDICTED: fibroblast growth factor receptor 2 isoform X5 [Salmo salar]
contig_0091996	contig_0091996	1..1294	0.94	-0.44	-1.36	0.41	0.67	1	0.94	-3.02	-8.11	0.00406	0.02	1		collagen Type XI Alpha2 [Salmo salar]
contig_0099511	contig_0099511	1..314	6.58	-0.44	-1.36	0.29	0.57	1	6.58	-2.5	-5.67	0.000349	0.00339	1		not available
contig_0106255	contig_0106255	1..324	3.76	-0.44	-1.36	0.41	0.67	1	3.76	-2.06	-4.17	0.00925	0.05	1		PREDICTED: opioid growth factor receptor-like [Salmo salar]
contig_0111353	contig_0111353	1..2041	2.39	-0.44	-1.36	0.11	0.33	1	2.39	-2.62	-6.14	8.88e-08	2.58e-06	0.02		NIF3-like protein 1 [Salmo salar]
contig_0223641	contig_0223641	1..1722	0.71	-0.44	-1.36	0.41	0.67	1	0.71	-2.06	-4.17	0.00925	0.05	1		not available
contig_0088532	contig_0088532	1..762	1.74	-0.45	-1.37	0.37	0.64	1	1.74	-2.18	-4.53	0.00561	0.03	1		PREDICTED: methylcytosine dioxygenase TET2-like [Salmo salar]
contig_0106663	contig_0106663	1..2297	1.36	-0.46	-1.37	0.2	0.47	1	1.36	-2.84	-7.17	8.13e-06	0.00014	1		not available
contig_0181097	contig_0181097	1..692	3.14	-0.45	-1.37	0.27	0.55	1	3.14	-2.1	-4.28	0.000589	0.00518	1		not available
contig_0197704	contig_0197704	1..1023	1.29	-0.45	-1.37	0.37	0.64	1	4.68	2.03	4.09	5.71e-08	1.73e-06	0.02		PREDICTED: glucagon receptor-like [Salmo salar]
contig_0009618	contig_0009618	1..1794	6.79	-0.46	-1.38	0.02	0.11	1	6.79	-2.28	-4.86	1.31e-15	1.6e-13	3.48e-10		not available
contig_0071972	contig_0071972	1..1228	1.16	-0.46	-1.38	0.35	0.61	1	1.16	-2.69	-6.46	0.00224	0.02	1		PREDICTED: uncharacterized protein LOC106586589 isoform X2 [Salmo salar]
contig_0133472	contig_0133472	1..2849	0.84	-0.47	-1.38	0.24	0.51	1	0.84	-3.42	-10.74	7.2e-05	0.000901	1		not available
contig_0133811	contig_0133811	1..2166	0.66	-0.46	-1.38	0.35	0.61	1	0.66	-2.69	-6.46	0.00224	0.02	1		PREDICTED: DNA fragmentation factor subunit beta isoform X3 [Salmo salar]
contig_0039610	contig_0039610	1..1675	1.49	-0.47	-1.39	0.23	0.5	1	1.49	-2.3	-4.91	0.00015	0.00168	1		PREDICTED: trinucleotide repeat-containing gene 6C protein-like, partial [Salmo salar]
contig_0045086	contig_0045086	1..278	3.81	-0.48	-1.39	0.4	0.66	1	3.81	-2.82	-7.06	0.00767	0.04	1		not available
contig_0056031	contig_0056031	1..1017	2.45	-0.47	-1.39	0.23	0.5	1	2.45	-2.77	-6.83	6.44e-05	0.000822	1		PREDICTED: SCAN domain-containing protein 3-like [Salmo salar]
contig_0065650	contig_0065650	1..1554	3.03	-0.48	-1.39	0.09	0.29	1	3.03	-3.02	-8.14	5.48e-08	1.67e-06	0.01		PREDICTED: uncharacterized protein LOC106600457 [Salmo salar]
contig_0076748	contig_0076748	1..920	1.15	-0.48	-1.39	0.4	0.66	1	1.15	-3.74	-13.39	0.00815	0.04	1		PREDICTED: dihydroxyacetone phosphate acyltransferase-like [Salmo salar]
contig_0106527	contig_0106527	1..1134	1.35	-0.47	-1.39	0.32	0.59	1	1.35	-4.28	-19.38	0.00231	0.02	1		PREDICTED: uncharacterized protein LOC106608127 [Salmo salar]
contig_0163090	contig_0163090	1..1291	0.82	-0.48	-1.39	0.4	0.66	1	0.82	-2.82	-7.06	0.00767	0.04	1		UPF0527 membrane protein [Salmo salar]
contig_0237917	contig_0237917	1..212	4.99	-0.48	-1.39	0.4	0.66	1	4.99	-2.82	-7.06	0.00767	0.04	1		PREDICTED: A disintegrin and metalloproteinase with thrombospondin motifs 18-like [Salmo salar]
contig_0002863	contig_0002863	1..201	5.79	-0.49	-1.4	0.37	0.63	1	5.79	-2.4	-5.27	0.00709	0.04	1		PREDICTED: insulin-induced gene 1 protein [Salmo salar]
contig_0018724	contig_0018724	1..692	7.96	-0.49	-1.4	0.07	0.25	1	7.96	-3.08	-8.47	5.16e-09	2e-07	0.00137		PREDICTED: scavenger receptor cysteine-rich type 1 protein M130-like [Salmo salar]
contig_0019048	contig_0019048	1..661	1.76	-0.49	-1.4	0.37	0.63	1	1.76	-2.96	-7.76	0.005	0.03	1		PREDICTED: G-protein-signaling modulator 1-like [Salmo salar]
contig_0033841	contig_0033841	1..416	2.8	-0.49	-1.4	0.37	0.63	1	2.8	-3.88	-14.72	0.00598	0.03	1		PREDICTED: alpha-(1,3)-fucosyltransferase 9-like [Salmo salar]
contig_0077338	contig_0077338	1..637	1.83	-0.49	-1.4	0.37	0.63	1	1.83	-3.88	-14.72	0.00598	0.03	1		not available
contig_0079254	contig_0079254	1..845	3.2	-0.48	-1.4	0.2	0.47	1	3.2	-3.6	-12.17	2.75e-05	0.000398	1		not available
contig_0094099	contig_0094099	1..600	1.94	-0.49	-1.4	0.37	0.63	1	1.94	-2.4	-5.27	0.00709	0.04	1		PREDICTED: phospholipase B-like 1 [Salmo salar]
contig_0102820	contig_0102820	1..2077	1.07	-0.49	-1.4	0.24	0.5	1	1.07	-2.13	-4.39	0.000467	0.0043	1		PREDICTED: N-acetylgalactosamine-6-sulfatase isoform X1 [Salmo salar]
contig_0164156	contig_0164156	1..1586	1.03	-0.48	-1.4	0.3	0.57	1	1.03	-2.17	-4.51	0.0022	0.01	1		PREDICTED: uncharacterized protein LOC106562560 isoform X1 [Salmo salar]
contig_0175889	contig_0175889	1..1055	1.1	-0.49	-1.4	0.37	0.63	1	1.1	-2.96	-7.76	0.005	0.03	1		PREDICTED: ubiquitin carboxyl-terminal hydrolase 31-like [Salmo salar]
contig_0006049	contig_0006049	1..324	7.19	-0.49	-1.41	0.22	0.49	1	7.19	-2.01	-4.03	0.000498	0.00451	1		PREDICTED: contactin-associated protein-like 2, partial [Salmo salar]
contig_0027359	contig_0027359	1..1052	14.74	-0.49	-1.41	0.00684	0.06	1	14.74	-2.06	-4.17	4.35e-17	6.39e-15	1.16e-11		tubulin tyrosine ligase-like family member 6a [Salmo salar]
contig_0050786	contig_0050786	1..1765	3.15	-0.5	-1.41	0.06	0.23	1	3.15	-2.27	-4.83	1.62e-08	5.57e-07	0.00431		PREDICTED: zinc finger homeobox protein 3 isoform X4 [Salmo salar]
contig_0077114	contig_0077114	1..396	6.15	-0.5	-1.41	0.21	0.48	1	6.15	-2.07	-4.21	0.000314	0.00311	1		Elongation factor 1-delta [Salmo salar]
contig_0088216	contig_0088216	1..270	4.71	-0.5	-1.41	0.34	0.61	1	4.71	-2.52	-5.74	0.00441	0.03	1		not available
contig_0101083	contig_0101083	1..932	1.36	-0.5	-1.41	0.34	0.61	1	1.36	-2.12	-4.35	0.00719	0.04	1		Myelin protein zero-like protein 2 precursor [Salmo salar]
contig_0122574	contig_0122574	1..686	1.85	-0.5	-1.41	0.34	0.61	1	1.85	-4	-16.05	0.00447	0.03	1		PREDICTED: collagen alpha-5(IV) chain-like isoform X2 [Salmo salar]
contig_0126508	contig_0126508	1..878	2.77	-0.5	-1.41	0.21	0.48	1	2.77	-2.07	-4.21	0.000314	0.00311	1		not available
contig_0127738	contig_0127738	1..944	1.35	-0.5	-1.41	0.34	0.61	1	1.35	-2.12	-4.35	0.00719	0.04	1		PREDICTED: parvalbumin beta-1-like isoform X2 [Salmo salar]
contig_0131561	contig_0131561	1..1378	0.92	-0.5	-1.41	0.34	0.61	1	0.92	-2.52	-5.74	0.00441	0.03	1		PREDICTED: protein FAM127-like [Salmo salar]
contig_0139514	contig_0139514	1..1595	2.69	-0.5	-1.41	0.09	0.29	1	2.69	-2.2	-4.58	2.08e-06	4.26e-05	0.55		not available
contig_0015755	contig_0015755	1..1619	0.85	-0.51	-1.42	0.32	0.59	1	0.85	-2.64	-6.22	0.0028	0.02	1		PREDICTED: LOW QUALITY PROTEIN: zinc finger homeobox protein 4-like, partial [Salmo salar]
contig_0022759	contig_0022759	1..1577	0.87	-0.51	-1.42	0.32	0.59	1	0.87	-3.2	-9.16	0.00225	0.02	1		PREDICTED: lys-63-specific deubiquitinase BRCC36-like isoform X2 [Salmo salar]
contig_0040420	contig_0040420	1..986	2.09	-0.51	-1.42	0.23	0.5	1	2.09	-2.82	-7.05	0.000242	0.00249	1		PREDICTED: uncharacterized protein LOC106586011 [Salmo salar]
contig_0057717	contig_0057717	1..450	3.06	-0.51	-1.42	0.32	0.59	1	3.06	-2.64	-6.22	0.0028	0.02	1		PREDICTED: thromboxane A2 receptor-like isoform X3 [Salmo salar]
contig_0059348	contig_0059348	1..663	2.95	-0.5	-1.42	0.25	0.52	1	2.95	-2.17	-4.5	0.00089	0.00724	1		not available
contig_0106185	contig_0106185	1..407	6.24	-0.5	-1.42	0.2	0.46	1	6.24	-2.14	-4.4	0.000199	0.00212	1		PREDICTED: nuclear receptor ROR-beta-like [Salmo salar]
contig_0115039	contig_0115039	1..351	3.92	-0.51	-1.42	0.32	0.59	1	3.92	-2.64	-6.22	0.0028	0.02	1		insulin-like growth factor binding protein 5 paralog A [Salmo salar]
contig_0071521	contig_0071521	1..1144	1.3	-0.52	-1.43	0.29	0.57	1	1.3	-4.23	-18.71	0.00262	0.02	1		PREDICTED: membrane-associated guanylate kinase, WW and PDZ domain-containing protein 3-like [Salmo salar]
contig_0080086	contig_0080086	1..488	3.04	-0.52	-1.43	0.29	0.57	1	3.04	-2.34	-5.07	0.00272	0.02	1		not available
contig_0082293	contig_0082293	1..1810	3.1	-0.51	-1.43	0.05	0.21	1	3.1	-2.38	-5.2	8.16e-09	3.01e-07	0.00217		PREDICTED: transmembrane protein 238-like [Salmo salar]
contig_0085710	contig_0085710	1..1239	1.75	-0.52	-1.43	0.22	0.49	1	1.75	-2.32	-4.98	0.000354	0.00343	1		PREDICTED: uncharacterized protein LOC106607470 [Salmo salar]
contig_0087189	contig_0087189	1..383	5.67	-0.52	-1.43	0.22	0.49	1	5.67	-2.1	-4.28	0.000589	0.00518	1		ORF2 protein [Salmo salar]
contig_0006641	contig_0006641	1..394	16.93	-0.53	-1.44	0.03	0.16	1	16.93	-2.37	-5.16	4.69e-10	2.25e-08	0.000125		PREDICTED: unconventional myosin-X isoform X2 [Salmo salar]
contig_0007510	contig_0007510	1..748	2.12	-0.52	-1.44	0.27	0.54	1	2.12	-2.44	-5.43	0.0017	0.01	1		PREDICTED: TBC1 domain family member 8B-like isoform X5 [Salmo salar]
contig_0009616	contig_0009616	1..1503	2.71	-0.53	-1.44	0.08	0.28	1	2.71	-2.5	-5.65	1.09e-06	2.41e-05	0.29		not available
contig_0031886	contig_0031886	1..632	2.51	-0.52	-1.44	0.27	0.54	1	2.51	-2.44	-5.43	0.0017	0.01	1		PREDICTED: uncharacterized protein LOC106613927 isoform X1 [Salmo salar]
contig_0036427	contig_0036427	1..3088	0.51	-0.52	-1.44	0.27	0.54	1	0.51	-2.13	-4.37	0.0028	0.02	1		PREDICTED: zinc finger MYM-type protein 1-like [Salmo salar]
contig_0039030	contig_0039030	1..1749	0.91	-0.52	-1.44	0.27	0.54	1	0.91	-2.13	-4.37	0.0028	0.02	1		PREDICTED: protein FAM186A-like, partial [Salmo salar]
contig_0042234	contig_0042234	1..4032	4.74	-0.53	-1.44	0.00206	0.03	1	4.74	-2.25	-4.77	1.51e-21	3.87e-19	4.02e-16		PREDICTED: histone-lysine N-methyltransferase 2C-like isoform X17 [Salmo salar]
contig_0048478	contig_0048478	1..1507	2.18	-0.53	-1.44	0.14	0.38	1	2.18	-2.34	-5.05	1.52e-05	0.000239	1		not available
contig_0072868	contig_0072868	1..2018	0.79	-0.52	-1.44	0.27	0.54	1	0.79	-2.13	-4.37	0.0028	0.02	1		PREDICTED: zinc finger protein 112-like isoform X2 [Salmo salar]
contig_0106948	contig_0106948	1..1346	2.36	-0.52	-1.44	0.14	0.39	1	2.36	-2.46	-5.49	1.45e-05	0.00023	1		not available
contig_0118788	contig_0118788	1..1469	1.15	-0.53	-1.44	0.26	0.52	1	1.15	-2.22	-4.66	0.00173	0.01	1		PREDICTED: spermatid perinuclear RNA-binding protein-like isoform X1 [Salmo salar]
contig_0006050	contig_0006050	1..1954	8.7	-0.54	-1.45	0.0026	0.03	1	8.7	-2.34	-5.05	2.06e-20	4.57e-18	5.49e-15		not available
contig_0010771	contig_0010771	1..2385	0.75	-0.53	-1.45	0.24	0.5	1	0.75	-2.31	-4.95	0.00108	0.00849	1		not available
contig_0015544	contig_0015544	1..1425	1.34	-0.54	-1.45	0.22	0.49	1	1.34	-3.1	-8.6	0.000357	0.00345	1		PREDICTED: ataxin-1-like [Salmo salar]
contig_0028184	contig_0028184	1..531	3.39	-0.53	-1.45	0.24	0.5	1	3.39	-2.05	-4.14	0.00181	0.01	1		Transposable element Tcb1 transposase [Salmo salar]
contig_0030725	contig_0030725	1..2030	1.83	-0.54	-1.45	0.11	0.34	1	1.83	-3.09	-8.5	1.05e-06	2.34e-05	0.28		Transposable element Tc1 transposase [Salmo salar]
contig_0030971	contig_0030971	1..1855	4.59	-0.54	-1.45	0.02	0.11	1	4.59	-2.25	-4.75	9.21e-12	6.1e-10	2.45e-06		not available
contig_0037214	contig_0037214	1..1785	1.51	-0.54	-1.45	0.16	0.41	1	1.51	-2.22	-4.67	0.000101	0.00121	1		PREDICTED: uncharacterized protein LOC106586115 [Salmo salar]
contig_0045904	contig_0045904	1..492	12.8	-0.54	-1.45	0.03	0.17	1	12.8	-2.13	-4.39	5.55e-09	2.14e-07	0.00148		PREDICTED: probable G-protein coupled receptor 116 isoform X3 [Salmo salar]
contig_0047810	contig_0047810	1..2187	0.87	-0.54	-1.45	0.22	0.49	1	0.87	-2.13	-4.38	0.00113	0.00879	1		PREDICTED: cell cycle progression 1 isoform X2 [Salmo salar]
contig_0051884	contig_0051884	1..340	7.94	-0.54	-1.45	0.16	0.41	1	7.94	-2.89	-7.41	2.91e-05	0.000417	1		interleukin 4/13A [Salmo salar]
contig_0052001	contig_0052001	1..1632	2.27	-0.54	-1.45	0.11	0.34	1	2.27	-2.68	-6.4	1.89e-06	3.93e-05	0.5		PREDICTED: polyhomeotic-like protein 1 isoform X1 [Salmo salar]
contig_0058405	contig_0058405	1..653	2.76	-0.53	-1.45	0.24	0.5	1	2.76	-2.31	-4.95	0.00108	0.00849	1		PREDICTED: ribonuclease-like 3, partial [Salmo salar]
contig_0068735	contig_0068735	1..410	2.45	-0.54	-1.45	0.36	0.62	1	2.45	-3.67	-12.73	0.00959	0.05	1		PREDICTED: coiled-coil domain-containing protein 105 [Salmo salar]
contig_0088452	contig_0088452	1..655	1.54	-0.54	-1.45	0.36	0.62	1	1.54	-2.75	-6.71	0.00958	0.05	1		zinc finger protein 180-like protein isoform X2 [Salmo salar]
contig_0134613	contig_0134613	1..551	1.83	-0.54	-1.45	0.36	0.62	1	1.83	-3.67	-12.73	0.00959	0.05	1		PREDICTED: glucocorticoid-induced transcript 1 protein-like isoform X2 [Salmo salar]
contig_0145701	contig_0145701	1..1102	0.91	-0.54	-1.45	0.36	0.62	1	0.91	-3.67	-12.73	0.00959	0.05	1		PREDICTED: alpha-1,3-mannosyl-glycoprotein 2-beta-N-acetylglucosaminyltransferase-like [Salmo salar]
contig_0015461	contig_0015461	1..1525	1.98	-0.54	-1.46	0.14	0.38	1	1.98	-2.22	-4.64	4.48e-05	0.000602	1		PREDICTED: neuron navigator 1-like isoform X13 [Salmo salar]
contig_0017376	contig_0017376	1..2220	1	-0.55	-1.46	0.19	0.44	1	1	-2.35	-5.11	0.000283	0.00284	1		collagen Type XI Alpha2 [Salmo salar]
contig_0034713	contig_0034713	1..1558	1.36	-0.55	-1.46	0.2	0.46	1	1.36	-2.28	-4.86	0.000444	0.00413	1		PREDICTED: A-kinase anchor protein 13-like [Salmo salar]
contig_0046221	contig_0046221	1..2890	0.38	-0.55	-1.46	0.33	0.59	1	0.38	-2.33	-5.03	0.00904	0.04	1		not available
contig_0052148	contig_0052148	1..256	4.34	-0.55	-1.46	0.33	0.59	1	4.34	-2.89	-7.41	0.00617	0.03	1		not available
contig_0061297	contig_0061297	1..743	2.85	-0.55	-1.46	0.2	0.46	1	2.85	-2.54	-5.81	0.00028	0.00282	1		ORF2 protein [Salmo salar]
contig_0070048	contig_0070048	1..1696	1.31	-0.55	-1.46	0.19	0.44	1	1.31	-2.92	-7.59	0.000132	0.00151	1		Deoxyribonuclease gamma precursor [Salmo salar]
contig_0094615	contig_0094615	1..948	1.17	-0.55	-1.46	0.33	0.59	1	1.17	-2.89	-7.41	0.00617	0.03	1		PREDICTED: uncharacterized protein LOC106591608 isoform X3 [Salmo salar]
contig_0106263	contig_0106263	1..1111	1.91	-0.55	-1.46	0.2	0.46	1	1.91	-2.28	-4.86	0.000444	0.00413	1		PREDICTED: ras-related protein Rab-19-like isoform X1 [Salmo salar]
contig_0147390	contig_0147390	1..2737	1.22	-0.55	-1.46	0.12	0.35	1	1.22	-2.72	-6.58	5.18e-06	9.49e-05	1		PREDICTED: ryanodine receptor 3-like isoform X7 [Salmo salar]
contig_0161007	contig_0161007	1..794	1.4	-0.55	-1.46	0.33	0.59	1	1.4	-2.33	-5.03	0.00904	0.04	1		not available
contig_0170564	contig_0170564	1..461	2.41	-0.55	-1.46	0.33	0.59	1	2.41	-3.81	-14.06	0.00696	0.04	1		PREDICTED: striatin-4-like isoform X1 [Salmo salar]
contig_0006036	contig_0006036	1..1058	4.2	-0.55	-1.47	0.06	0.23	1	4.2	-2.62	-6.16	2.73e-07	7.05e-06	0.07		PREDICTED: sodium/calcium exchanger 1-like isoform X3 [Salmo salar]
contig_0008624	contig_0008624	1..1180	1.03	-0.55	-1.47	0.31	0.58	1	1.03	-3.94	-15.39	0.00516	0.03	1		PREDICTED: rho GTPase-activating protein 12-like isoform X2 [Salmo salar]
contig_0040842	contig_0040842	1..1195	1.02	-0.55	-1.47	0.31	0.58	1	1.02	-3.94	-15.39	0.00516	0.03	1		not available
contig_0045601	contig_0045601	1..850	1.56	-0.56	-1.47	0.28	0.56	1	1.56	-3.14	-8.81	0.00273	0.02	1		Lipoma HMGIC fusion partner-like 4 protein [Salmo salar]
contig_0060778	contig_0060778	1..2007	1.21	-0.56	-1.47	0.17	0.42	1	1.21	-2.07	-4.21	0.000314	0.00311	1		not available
contig_0088657	contig_0088657	1..706	1.87	-0.56	-1.47	0.28	0.56	1	1.87	-2.18	-4.53	0.00561	0.03	1		PREDICTED: uncharacterized protein LOC106607134 isoform X1 [Salmo salar]
contig_0095465	contig_0095465	1..1277	0.95	-0.55	-1.47	0.31	0.58	1	0.95	-2.46	-5.5	0.00558	0.03	1		PREDICTED: dedicator of cytokinesis protein 9-like isoform X8 [Salmo salar]
contig_0105389	contig_0105389	1..2893	0.42	-0.55	-1.47	0.31	0.58	1	0.42	-2.46	-5.5	0.00558	0.03	1		PREDICTED: active breakpoint cluster region-related protein-like [Salmo salar]
contig_0115742	contig_0115742	1..515	2.36	-0.55	-1.47	0.31	0.58	1	2.36	-3.02	-8.11	0.00406	0.02	1		not available
contig_0119322	contig_0119322	1..1932	1.84	-0.55	-1.47	0.11	0.33	1	1.84	-2.04	-4.11	2.4e-05	0.000354	1		PREDICTED: calmodulin-regulated spectrin-associated protein 2-like isoform X2 [Salmo salar]
contig_0148596	contig_0148596	1..924	2.75	-0.56	-1.47	0.16	0.41	1	2.75	-2.14	-4.4	0.000199	0.00212	1		not available
contig_0239675	contig_0239675	1..291	4.55	-0.56	-1.47	0.28	0.56	1	4.55	-2.18	-4.53	0.00561	0.03	1		PREDICTED: uncharacterized protein LOC106605384, partial [Salmo salar]
contig_0004419	contig_0004419	1..2377	14.43	-0.56	-1.48	0.00017	0.00385	1	14.43	-3.86	-14.5	7.7e-43	7.97e-40	2.05e-37		PREDICTED: translocator protein-like [Salmo salar]
contig_0009591	contig_0009591	1..589	2.43	-0.56	-1.48	0.26	0.54	1	2.43	-2.69	-6.46	0.00224	0.02	1		PREDICTED: A-kinase anchor protein 9 isoform X2 [Salmo salar]
contig_0011005	contig_0011005	1..3175	1.9	-0.57	-1.48	0.03	0.15	1	1.9	-2	-4.01	2.76e-08	9.04e-07	0.00735		PREDICTED: roquin-1-like isoform X1 [Salmo salar]
contig_0018073	contig_0018073	1..1222	3.6	-0.57	-1.48	0.05	0.22	1	3.6	-2.76	-6.76	2.23e-07	5.89e-06	0.06		PREDICTED: DNA (cytosine-5)-methyltransferase 3A-like isoform X1 [Salmo salar]
contig_0023564	contig_0023564	1..1473	0.07	-0.56	-1.48	0.74	NaN	1	0.6	3.16	8.92	0.00327	0.02	1		not available
contig_0027108	contig_0027108	1..1823	1.68	-0.57	-1.48	0.12	0.35	1	1.68	-2.24	-4.73	3.6e-05	0.0005	1		PREDICTED: dual specificity protein phosphatase 7-like [Salmo salar]
contig_0031862	contig_0031862	1..913	0.12	-0.56	-1.48	0.74	NaN	1	3.32	4.93	30.4	1.49e-06	3.18e-05	0.4		collagen Type XI Alpha2 [Salmo salar]
contig_0047160	contig_0047160	1..269	6.1	-0.57	-1.48	0.23	0.5	1	6.1	-2.17	-4.51	0.0022	0.01	1		not available
contig_0060699	contig_0060699	1..213	0.5	-0.56	-1.48	0.74	NaN	1	4.44	3.26	9.55	0.00232	0.02	1		PREDICTED: transcription factor GATA-5-like [Salmo salar]
contig_0062150	contig_0062150	1..1544	0.99	-0.57	-1.48	0.25	0.52	1	0.99	-2.79	-6.93	0.00145	0.01	1		PREDICTED: transcription factor 7-like 2 isoform X2 [Salmo salar]
contig_0091791	contig_0091791	1..1015	1.41	-0.56	-1.48	0.26	0.54	1	1.41	-4.17	-18.05	0.00298	0.02	1		PREDICTED: annexin A2-like isoform X2 [Salmo salar]
contig_0095548	contig_0095548	1..1829	0.78	-0.56	-1.48	0.26	0.54	1	0.78	-2.29	-4.89	0.00345	0.02	1		PREDICTED: polyhomeotic-like protein 1 isoform X1 [Salmo salar]
contig_0099981	contig_0099981	1..1696	0.06	-0.56	-1.48	0.74	NaN	1	0.45	2.94	7.66	0.00678	0.04	1		not available
contig_0118124	contig_0118124	1..1503	1.02	-0.57	-1.48	0.25	0.52	1	1.02	-2.08	-4.22	0.00357	0.02	1		PREDICTED: neuronal PAS domain-containing protein 2-like isoform X4 [Salmo salar]
contig_0129178	contig_0129178	1..1785	0.86	-0.57	-1.48	0.25	0.52	1	0.86	-4.28	-19.38	0.00231	0.02	1		PREDICTED: poly [ADP-ribose] polymerase 6 isoform X1 [Salmo salar]
contig_0152194	contig_0152194	1..1234	0.09	-0.56	-1.48	0.74	NaN	1	2.61	5.01	32.3	9.38e-07	2.11e-05	0.25		PREDICTED: collagen alpha-1(VI) chain-like [Salmo salar]
contig_0202038	contig_0202038	1..225	0.47	-0.56	-1.48	0.74	NaN	1	3.08	2.81	7.02	0.00999	0.05	1		PREDICTED: uncharacterized protein LOC106614011 [Salmo salar]
contig_0040175	contig_0040175	1..1553	1.12	-0.57	-1.49	0.22	0.48	1	1.12	-2.98	-7.88	0.000639	0.00552	1		not available
contig_0049453	contig_0049453	1..3796	1.3	-0.57	-1.49	0.04	0.19	1	1.3	-3.09	-8.5	2.73e-08	8.95e-07	0.00727		PREDICTED: PDZ domain-containing protein 2-like [Salmo salar]
contig_0085979	contig_0085979	1..1443	1.28	-0.58	-1.49	0.2	0.47	1	1.28	-3.62	-12.31	0.000473	0.00434	1		PREDICTED: zinc finger protein 883-like [Salmo salar]
contig_0093885	contig_0093885	1..746	4.68	-0.57	-1.49	0.1	0.32	1	4.68	-2.14	-4.41	1.77e-05	0.000272	1		not available
contig_0107664	contig_0107664	1..2304	0.8	-0.58	-1.49	0.2	0.47	1	0.8	-3.06	-8.36	0.000432	0.00404	1		PREDICTED: olfactory receptor 11A1-like [Salmo salar]
contig_0138718	contig_0138718	1..887	2.09	-0.58	-1.49	0.2	0.47	1	2.09	-3.06	-8.36	0.000432	0.00404	1		PREDICTED: NACHT, LRR and PYD domains-containing protein 3-like [Salmo salar]
contig_0014728	contig_0014728	1..2085	1.04	-0.58	-1.5	0.17	0.42	1	1.04	-2.1	-4.28	0.000589	0.00518	1		collagen Type XI Alpha2 [Salmo salar]
contig_0016265	contig_0016265	1..4017	1.05	-0.58	-1.5	0.05	0.21	1	1.05	-2.87	-7.32	2.79e-07	7.18e-06	0.07		PREDICTED: T-cell acute lymphocytic leukemia protein 1 homolog [Salmo salar]
contig_0021254	contig_0021254	1..3500	3.36	-0.58	-1.5	0.00397	0.04	1	3.36	-2.36	-5.12	1.42e-15	1.73e-13	3.77e-10		PREDICTED: transmembrane protein 56-B-like [Salmo salar]
contig_0038159	contig_0038159	1..1748	1.3	-0.58	-1.5	0.16	0.41	1	1.3	-2.39	-5.23	0.000226	0.00236	1		PREDICTED: solute carrier family 2, facilitated glucose transporter member 1 isoform X2 [Salmo salar]
contig_0045931	contig_0045931	1..2791	0.85	-0.59	-1.5	0.15	0.4	1	0.85	-2.45	-5.47	0.000145	0.00164	1		PREDICTED: uncharacterized protein LOC106605591 isoform X2 [Salmo salar]
contig_0078351	contig_0078351	1..3396	0.64	-0.58	-1.5	0.17	0.42	1	0.64	-3.29	-9.79	0.000143	0.00162	1		not available
contig_0092914	contig_0092914	1..1002	4.33	-0.58	-1.5	0.05	0.21	1	4.33	-2.74	-6.68	2.69e-07	6.98e-06	0.07		PREDICTED: uncharacterized protein LOC106573797, partial [Salmo salar]
contig_0097324	contig_0097324	1..673	3.07	-0.58	-1.5	0.18	0.43	1	3.07	-3.22	-9.31	0.000205	0.00217	1		High mobility group-T protein [Salmo salar]
contig_0021745	contig_0021745	1..2815	11.66	-0.6	-1.51	8.34e-05	0.00217	1	11.66	-4.93	-30.4	4e-36	3.2e-33	1.07e-30		PREDICTED: haptoglobin-like, partial [Salmo salar]
contig_0049701	contig_0049701	1..1562	1.8	-0.59	-1.51	0.12	0.35	1	1.8	-2.11	-4.32	0.000109	0.00128	1		PREDICTED: uncharacterized protein LOC106605365 [Salmo salar]
contig_0066097	contig_0066097	1..3554	0.82	-0.59	-1.51	0.12	0.34	1	0.82	-2.52	-5.74	2.65e-05	0.000386	1		PREDICTED: phosphatidylinositol 4-phosphate 3-kinase C2 domain-containing subunit beta-like [Salmo salar]
contig_0068143	contig_0068143	1..1990	1.62	-0.59	-1.51	0.1	0.32	1	1.62	-3.15	-8.86	4.53e-06	8.42e-05	1		PREDICTED: neurotrophin receptor-interacting factor 1-like isoform X1 [Salmo salar]
contig_0070182	contig_0070182	1..931	3.01	-0.59	-1.51	0.12	0.35	1	3.01	-2.94	-7.7	1.98e-05	0.000299	1		Small nuclear ribonucleoprotein Sm D3 [Salmo salar]
contig_0083143	contig_0083143	1..2322	1.71	-0.6	-1.51	0.07	0.26	1	1.71	-2.78	-6.86	7.15e-07	1.66e-05	0.19		PREDICTED: uncharacterized protein LOC106565892 [Salmo salar]
contig_0105926	contig_0105926	1..3255	1.06	-0.6	-1.51	0.09	0.3	1	1.06	-2.98	-7.89	2.61e-06	5.16e-05	0.69		PREDICTED: plectin-like [Salmo salar]
contig_0181835	contig_0181835	1..304	0.7	-0.59	-1.51	0.63	NaN	1	4.15	2.71	6.56	0.000668	0.00573	1		PREDICTED: uncharacterized protein LOC106598485, partial [Salmo salar]
contig_0072982	contig_0072982	1..1295	3.23	-0.6	-1.52	0.05	0.2	1	3.23	-2.05	-4.15	5.3e-06	9.68e-05	1		PREDICTED: uncharacterized protein LOC106606371 [Salmo salar]
contig_0107131	contig_0107131	1..1098	3.91	-0.6	-1.52	0.04	0.2	1	3.91	-2.57	-5.94	4.91e-07	1.19e-05	0.13		PREDICTED: tyrosine-protein phosphatase non-receptor type 21-like isoform X2 [Salmo salar]
contig_0141454	contig_0141454	1..1083	4.94	-0.6	-1.52	0.03	0.14	1	4.94	-6.07	-67.26	1.17e-05	0.000191	1		not available
contig_0165502	contig_0165502	1..1095	0.39	-0.6	-1.52	0.5	NaN	1	6.56	4.24	18.93	2.4e-15	2.83e-13	6.4e-10		interleukin-17A/F3 [Salmo salar]
contig_0010089	contig_0010089	1..1877	1.13	-0.62	-1.53	0.15	0.4	1	1.13	-2.06	-4.18	0.000744	0.00625	1		PREDICTED: uncharacterized protein LOC106605365 [Salmo salar]
contig_0014822	contig_0014822	1..1382	1.92	-0.62	-1.53	0.12	0.34	1	1.92	-2.38	-5.22	7.74e-05	0.000958	1		transposase [Salmo salar]
contig_0026962	contig_0026962	1..1019	1.56	-0.62	-1.53	0.21	0.47	1	1.56	-2.84	-7.17	0.00118	0.0091	1		PREDICTED: YTH domain-containing protein 1 [Salmo salar]
contig_0031581	contig_0031581	1..1842	0.69	-0.61	-1.53	0.25	0.52	1	0.69	-3.08	-8.46	0.00332	0.02	1		PREDICTED: proteasome subunit beta type-7 isoform X1 [Salmo salar]
contig_0035341	contig_0035341	1..1057	2.3	-0.62	-1.53	0.13	0.36	1	2.3	-2.48	-5.59	0.000117	0.00136	1		PREDICTED: DNA-directed RNA polymerase II subunit RPB1-like [Salmo salar]
contig_0038188	contig_0038188	1..2846	0.52	-0.62	-1.53	0.22	0.49	1	0.52	-2.03	-4.08	0.00456	0.03	1		PREDICTED: CCR4-NOT transcription complex subunit 4-like, partial [Salmo salar]
contig_0038427	contig_0038427	1..657	1.77	-0.61	-1.53	0.27	0.54	1	1.77	-2.4	-5.27	0.00709	0.04	1		PREDICTED: plectin-like [Salmo salar]
contig_0040410	contig_0040410	1..3557	1.16	-0.62	-1.53	0.04	0.19	1	1.16	-2.83	-7.13	4.05e-07	1e-05	0.11		Deoxyribonuclease gamma precursor [Salmo salar]
contig_0041447	contig_0041447	1..1345	1.02	-0.62	-1.53	0.24	0.5	1	1.02	-2.64	-6.22	0.0028	0.02	1		PREDICTED: transcription factor SOX-6-like isoform X2 [Salmo salar]
contig_0042194	contig_0042194	1..256	4.14	-0.61	-1.53	0.29	0.57	1	4.14	-2.82	-7.06	0.00767	0.04	1		Sodium/potassium-transporting ATPase subunit alpha-1 precursor [Salmo salar]
contig_0048036	contig_0048036	1..1270	1.17	-0.62	-1.53	0.22	0.49	1	1.17	-2.03	-4.08	0.00456	0.03	1		PREDICTED: probable palmitoyltransferase ZDHHC20 isoform X2 [Salmo salar]
contig_0055413	contig_0055413	1..1756	2.05	-0.62	-1.53	0.08	0.27	1	2.05	-2.32	-4.99	6.95e-06	0.000122	1		PREDICTED: uncharacterized protein LOC106609103 isoform X4 [Salmo salar]
contig_0059376	contig_0059376	1..2522	1.26	-0.62	-1.53	0.09	0.3	1	1.26	-2.65	-6.26	9.45e-06	0.000159	1		PREDICTED: zinc finger protein 883-like isoform X2 [Salmo salar]
contig_0062048	contig_0062048	1..849	3.87	-0.62	-1.53	0.09	0.29	1	3.87	-2.05	-4.14	4.21e-05	0.000572	1		PREDICTED: bromodomain-containing protein 1-like, partial [Salmo salar]
contig_0067209	contig_0067209	1..1027	1.75	-0.62	-1.53	0.18	0.44	1	1.75	-2.62	-6.15	0.000695	0.00592	1		PREDICTED: uncharacterized protein LOC106600457 [Salmo salar]
contig_0071954	contig_0071954	1..528	2.21	-0.61	-1.53	0.27	0.54	1	2.21	-2.4	-5.27	0.00709	0.04	1		PREDICTED: AFG3-like protein 1 [Salmo salar]
contig_0072368	contig_0072368	1..569	3.16	-0.62	-1.53	0.18	0.44	1	3.16	-2.05	-4.14	0.00181	0.01	1		PREDICTED: amyloid beta A4 precursor protein-binding family B member 2-like isoform X1 [Salmo salar]
contig_0074488	contig_0074488	1..755	5.75	-0.62	-1.53	0.04	0.18	1	5.75	-2.11	-4.31	2.83e-06	5.56e-05	0.75		not available
contig_0075913	contig_0075913	1..2433	0.96	-0.62	-1.53	0.14	0.37	1	0.96	-2.2	-4.6	0.000295	0.00294	1		PREDICTED: NACHT, LRR and PYD domains-containing protein 12-like isoform X1 [Salmo salar]
contig_0076546	contig_0076546	1..768	3.31	-0.62	-1.53	0.12	0.35	1	3.31	-2.8	-6.97	5.26e-05	0.000692	1		PREDICTED: diacylglycerol kinase delta-like isoform X3 [Salmo salar]
contig_0078312	contig_0078312	1..528	5.41	-0.62	-1.53	0.11	0.32	1	5.41	-2.14	-4.4	8.69e-05	0.00106	1		not available
contig_0078586	contig_0078586	1..1028	1.54	-0.62	-1.53	0.21	0.47	1	1.54	-2.44	-5.43	0.0017	0.01	1		PREDICTED: fibroblast growth factor 13-like isoform X3 [Salmo salar]
contig_0080692	contig_0080692	1..1131	1.5	-0.62	-1.53	0.19	0.45	1	1.5	-2.53	-5.79	0.00108	0.00849	1		not available
contig_0085877	contig_0085877	1..252	5.04	-0.61	-1.53	0.25	0.52	1	5.04	-2.52	-5.74	0.00441	0.03	1		PREDICTED: semaphorin-5B isoform X2 [Salmo salar]
contig_0085945	contig_0085945	1..843	1.51	-0.61	-1.53	0.25	0.52	1	1.51	-2.12	-4.35	0.00719	0.04	1		Tripartite motif-containing protein 25 [Salmo salar]
contig_0087476	contig_0087476	1..1607	0.86	-0.62	-1.53	0.24	0.5	1	0.86	-4.12	-17.38	0.0034	0.02	1		PREDICTED: peptidyl-prolyl cis-trans isomerase A-like isoform X1 [Salmo salar]
contig_0089473	contig_0089473	1..649	1.96	-0.61	-1.53	0.25	0.52	1	1.96	-3.08	-8.46	0.00332	0.02	1		PREDICTED: TOM1-like protein 2, partial [Salmo salar]
contig_0100914	contig_0100914	1..224	5.67	-0.61	-1.53	0.25	0.52	1	5.67	-3.08	-8.46	0.00332	0.02	1		PREDICTED: proheparin-binding EGF-like growth factor [Salmo salar]
contig_0104922	contig_0104922	1..916	1.62	-0.62	-1.53	0.22	0.49	1	1.62	-2.03	-4.08	0.00456	0.03	1		PREDICTED: lysine-specific demethylase phf2-like [Salmo salar]
contig_0105444	contig_0105444	1..691	4.29	-0.62	-1.53	0.1	0.32	1	4.29	-2.55	-5.85	2.15e-05	0.000322	1		Transposable element Tcb1 transposase [Salmo salar]
contig_0107550	contig_0107550	1..1499	0.92	-0.62	-1.53	0.24	0.5	1	0.92	-2.23	-4.71	0.00439	0.03	1		PREDICTED: septin-7-like isoform X2 [Salmo salar]
contig_0107976	contig_0107976	1..913	1.16	-0.61	-1.53	0.29	0.57	1	1.16	-3.74	-13.39	0.00815	0.04	1		not available
contig_0110502	contig_0110502	1..2837	0.52	-0.62	-1.53	0.22	0.49	1	0.52	-2.34	-5.07	0.00272	0.02	1		PREDICTED: A-kinase anchor protein 13-like isoform X8 [Salmo salar]
contig_0112924	contig_0112924	1..2847	0.6	-0.62	-1.53	0.19	0.45	1	0.6	-2.22	-4.66	0.00173	0.01	1		not available
contig_0119548	contig_0119548	1..1191	3.29	-0.62	-1.53	0.07	0.25	1	3.29	-2.07	-4.19	9.03e-06	0.000153	1		PREDICTED: autophagy-related protein 16-1-like, partial [Salmo salar]
contig_0124492	contig_0124492	1..876	0.73	-0.61	-1.53	0.41	0.67	1	2.59	2.01	4.02	8.1e-05	0.000996	1		not available
contig_0129398	contig_0129398	1..1678	1.45	-0.62	-1.53	0.13	0.36	1	1.45	-2.07	-4.21	0.000314	0.00311	1		PREDICTED: proline-, glutamic acid- and leucine-rich protein 1-like isoform X1 [Salmo salar]
contig_0139283	contig_0139283	1..1254	1.27	-0.62	-1.53	0.21	0.47	1	1.27	-2.44	-5.43	0.0017	0.01	1		PREDICTED: nuclear factor 1 A-type isoform X9 [Salmo salar]
contig_0142205	contig_0142205	1..2254	0.85	-0.62	-1.53	0.17	0.42	1	0.85	-3.66	-12.66	0.000404	0.00382	1		not available
contig_0142866	contig_0142866	1..366	2.89	-0.61	-1.53	0.29	0.57	1	2.89	-2.82	-7.06	0.00767	0.04	1		Flotillin-2a [Salmo salar]
contig_0144245	contig_0144245	1..2276	0.7	-0.62	-1.53	0.21	0.47	1	0.7	-2.84	-7.17	0.00118	0.0091	1		PREDICTED: ataxin-1-like, partial [Salmo salar]
contig_0150927	contig_0150927	1..860	2.46	-0.62	-1.53	0.15	0.4	1	2.46	-2.85	-7.23	0.000197	0.00211	1		PREDICTED: DNA-binding protein RFX7-like isoform X2 [Salmo salar]
contig_0158621	contig_0158621	1..424	2.75	-0.61	-1.53	0.27	0.54	1	2.75	-2.4	-5.27	0.00709	0.04	1		PREDICTED: collagen alpha-1(XXVIII) chain-like [Salmo salar]
contig_0198504	contig_0198504	1..1136	1.3	-0.62	-1.53	0.22	0.49	1	1.3	-2.34	-5.07	0.00272	0.02	1		PREDICTED: solute carrier family 26 member 9-like [Salmo salar]
contig_0048614	contig_0048614	1..3444	5.38	-0.63	-1.54	0.000358	0.00699	1	5.38	-2.04	-4.11	3.6e-19	6.88e-17	9.59e-14		Transposable element Tcb1 transposase [Salmo salar]
contig_0005070	contig_0005070	1..543	10.04	-0.63	-1.55	0.02	0.12	1	10.04	-3.24	-9.42	5.12e-09	1.99e-07	0.00136		not available
contig_0024581	contig_0024581	1..509	14.04	-0.63	-1.55	0.00983	0.08	1	14.04	-2.18	-4.53	4.84e-10	2.32e-08	0.000129		olfactory receptor family C subfamily 4 member 9 [Salmo salar]
contig_0049748	contig_0049748	1..2428	3.07	-0.63	-1.55	0.00868	0.07	1	3.07	-2	-4	1.02e-09	4.56e-08	0.000272		PREDICTED: remodeling and spacing factor 1-like [Salmo salar]
contig_0104071	contig_0104071	1..749	6.29	-0.63	-1.55	0.03	0.15	1	6.29	-2.33	-5.04	4.07e-07	1.01e-05	0.11		PREDICTED: ephrin type-A receptor 4-like, partial [Salmo salar]
contig_0027992	contig_0027992	1..967	3.34	-0.64	-1.56	0.08	0.28	1	3.34	-2.31	-4.97	1.88e-05	0.000287	1		PREDICTED: anoctamin-5 isoform X1 [Salmo salar]
contig_0037180	contig_0037180	1..1520	9.79	-0.65	-1.56	0.000616	0.01	1	9.79	-2.14	-4.42	3.24e-17	4.88e-15	8.62e-12		PREDICTED: SLAM family member 5-like isoform X1 [Salmo salar]
contig_0098343	contig_0098343	1..3188	1.83	-0.64	-1.56	0.02	0.1	1	1.83	-2.02	-4.06	4e-08	1.26e-06	0.01		PREDICTED: S-antigen protein-like [Salmo salar]
contig_0109901	contig_0109901	1..1838	1.47	-0.65	-1.56	0.1	0.31	1	1.47	-3.6	-12.17	2.75e-05	0.000398	1		PREDICTED: uncharacterized protein LOC106609590 [Salmo salar]
contig_0116032	contig_0116032	1..2985	1.22	-0.64	-1.56	0.07	0.25	1	1.22	-2.2	-4.61	9.29e-06	0.000157	1		Transposable element Tcb1 transposase [Salmo salar]
contig_0035420	contig_0035420	1..2299	2.88	-0.65	-1.57	0.00961	0.08	1	2.88	-2	-4.01	6.93e-09	2.61e-07	0.00185		PREDICTED: histone-lysine N-methyltransferase 2A-like isoform X1 [Salmo salar]
contig_0047455	contig_0047455	1..2876	1.62	-0.65	-1.57	0.03	0.14	1	1.62	-2.32	-4.98	4.97e-07	1.2e-05	0.13		PREDICTED: WD repeat and FYVE domain-containing protein 3 [Salmo salar]
contig_0055979	contig_0055979	1..1191	4.44	-0.65	-1.57	0.02	0.12	1	4.44	-2.74	-6.68	1.97e-08	6.63e-07	0.00524		PREDICTED: zinc finger and SCAN domain-containing protein 2-like [Salmo salar]
contig_0088339	contig_0088339	1..1935	1.18	-0.65	-1.57	0.12	0.35	1	1.18	-2.17	-4.49	0.000371	0.00356	1		collagen Type XI Alpha2 [Salmo salar]
contig_0074434	contig_0074434	1..3337	0.52	-0.66	-1.58	0.16	0.41	1	0.52	-4.46	-22.04	0.00144	0.01	1		not available
contig_0082028	contig_0082028	1..453	3.86	-0.66	-1.58	0.16	0.41	1	3.86	-2.26	-4.8	0.00137	0.01	1		PREDICTED: zinc finger protein 883-like isoform X1 [Salmo salar]
contig_0086972	contig_0086972	1..807	2.3	-0.66	-1.58	0.15	0.4	1	2.3	-3.06	-8.36	0.000432	0.00404	1		PREDICTED: uncharacterized protein C20orf194 homolog [Salmo salar]
contig_0003203	contig_0003203	1..424	3.12	-0.67	-1.59	0.21	0.47	1	3.12	-2.58	-5.98	0.00351	0.02	1		PREDICTED: pre-B-cell leukemia transcription factor-interacting protein 1-like [Salmo salar]
contig_0016116	contig_0016116	1..2585	2.54	-0.67	-1.59	0.0087	0.07	1	2.54	-2.12	-4.36	3.11e-09	1.26e-07	0.000828		not available
contig_0019916	contig_0019916	1..674	4.4	-0.67	-1.59	0.08	0.27	1	4.4	-2.36	-5.13	3.39e-05	0.000475	1		PREDICTED: tyrosine-protein phosphatase non-receptor type 21-like isoform X2 [Salmo salar]
contig_0030308	contig_0030308	1..1346	2.2	-0.67	-1.59	0.08	0.27	1	2.2	-2.55	-5.85	2.15e-05	0.000322	1		Glycogen phosphorylase, brain form [Salmo salar]
contig_0030611	contig_0030611	1..1274	1.04	-0.67	-1.59	0.21	0.47	1	1.04	-3.14	-8.81	0.00273	0.02	1		PREDICTED: C-type lectin domain family 4 member E-like isoform X1 [Salmo salar]
contig_0063102	contig_0063102	1..2291	0.62	-0.67	-1.59	0.19	0.45	1	0.62	-2.29	-4.89	0.00345	0.02	1		Calcium-binding protein 39 [Salmo salar]
contig_0065116	contig_0065116	1..1646	2.61	-0.67	-1.59	0.03	0.14	1	2.61	-2.09	-4.26	3.49e-06	6.68e-05	0.93		PREDICTED: myelin transcription factor 1-like isoform X3 [Salmo salar]
contig_0073012	contig_0073012	1..751	1.76	-0.67	-1.59	0.21	0.47	1	1.76	-2.58	-5.98	0.00351	0.02	1		not available
contig_0084351	contig_0084351	1..1420	1.01	-0.67	-1.59	0.19	0.45	1	1.01	-2.29	-4.89	0.00345	0.02	1		collagen Type XI Alpha2 [Salmo salar]
contig_0094832	contig_0094832	1..1032	1.49	-0.67	-1.59	0.18	0.44	1	1.49	-3.35	-10.21	0.0013	0.00984	1		not available
contig_0115265	contig_0115265	1..1096	1.21	-0.67	-1.59	0.21	0.47	1	1.21	-2.58	-5.98	0.00351	0.02	1		PREDICTED: histone-lysine N-methyltransferase 2D-like isoform X2 [Salmo salar]
contig_0124711	contig_0124711	1..457	3.13	-0.67	-1.59	0.19	0.45	1	3.13	-2.29	-4.89	0.00345	0.02	1		PREDICTED: tyrosine-protein phosphatase non-receptor type 4-like isoform X2 [Salmo salar]
contig_0127277	contig_0127277	1..1576	0.84	-0.67	-1.59	0.21	0.47	1	0.84	-3.14	-8.81	0.00273	0.02	1		not available
contig_0150952	contig_0150952	1..683	1.94	-0.67	-1.59	0.21	0.47	1	1.94	-3.14	-8.81	0.00273	0.02	1		not available
contig_0013092	contig_0013092	1..731	1.67	-0.68	-1.6	0.22	0.49	1	1.67	-3.94	-15.39	0.00516	0.03	1		not available
contig_0013314	contig_0013314	1..401	3.04	-0.68	-1.6	0.22	0.49	1	3.04	-3.02	-8.11	0.00406	0.02	1		PREDICTED: sacsin-like isoform X2 [Salmo salar]
contig_0036982	contig_0036982	1..428	5.94	-0.68	-1.6	0.09	0.3	1	5.94	-2.14	-4.4	0.000199	0.00212	1		PREDICTED: ubiquitin-conjugating enzyme E2 Q2-like isoform X4 [Salmo salar]
contig_0046283	contig_0046283	1..1490	27.18	-0.68	-1.6	3.45e-06	0.000144	0.94	27.18	-3.65	-12.57	8.6e-49	1.08e-45	2.29e-43		not available
contig_0129213	contig_0129213	1..1031	1.18	-0.68	-1.6	0.22	0.49	1	1.18	-3.02	-8.11	0.00406	0.02	1		PREDICTED: ribosomal protein S6 kinase beta-1-like isoform X1 [Salmo salar]
contig_0148095	contig_0148095	1..368	3.31	-0.68	-1.6	0.22	0.49	1	3.31	-3.94	-15.39	0.00516	0.03	1		PREDICTED: glutamate receptor ionotropic, delta-2-like isoform X2 [Salmo salar]
contig_0157074	contig_0157074	1..759	1.6	-0.68	-1.6	0.22	0.49	1	1.6	-2.46	-5.5	0.00558	0.03	1		PREDICTED: calcium-binding protein 39-like [Salmo salar]
contig_0031658	contig_0031658	1..1559	1.43	-0.69	-1.61	0.11	0.33	1	1.43	-2.13	-4.39	0.000467	0.0043	1		transposase [Salmo salar]
contig_0041040	contig_0041040	1..1516	0.73	-0.68	-1.61	0.24	0.5	1	0.73	-3.81	-14.06	0.00696	0.04	1		not available
contig_0067316	contig_0067316	1..1951	0.57	-0.68	-1.61	0.24	0.5	1	0.57	-2.33	-5.03	0.00904	0.04	1		PREDICTED: girdin-like isoform X1 [Salmo salar]
contig_0068090	contig_0068090	1..702	1.58	-0.68	-1.61	0.24	0.5	1	1.58	-3.81	-14.06	0.00696	0.04	1		Transposable element Tcb1 transposase [Salmo salar]
contig_0076804	contig_0076804	1..2150	0.47	-0.69	-1.61	0.25	0.52	1	0.47	-2.75	-6.71	0.00958	0.05	1		PREDICTED: uncharacterized protein LOC106589496 [Salmo salar]
contig_0100051	contig_0100051	1..315	3.53	-0.68	-1.61	0.24	0.5	1	3.53	-2.33	-5.03	0.00904	0.04	1		PREDICTED: LIM domain-binding protein 1 isoform X7 [Salmo salar]
contig_0102177	contig_0102177	1..489	2.06	-0.69	-1.61	0.25	0.52	1	2.06	-2.75	-6.71	0.00958	0.05	1		not available
contig_0103771	contig_0103771	1..1273	1.75	-0.69	-1.61	0.11	0.33	1	1.75	-2.92	-7.59	0.000132	0.00151	1		not available
contig_0104519	contig_0104519	1..396	2.81	-0.68	-1.61	0.24	0.5	1	2.81	-2.89	-7.41	0.00617	0.03	1		not available
contig_0108795	contig_0108795	1..1796	0.56	-0.69	-1.61	0.25	0.52	1	0.56	-2.75	-6.71	0.00958	0.05	1		PREDICTED: NACHT, LRR and PYD domains-containing protein 3-like isoform X4 [Salmo salar]
contig_0114806	contig_0114806	1..985	1.02	-0.69	-1.61	0.25	0.52	1	1.02	-2.75	-6.71	0.00958	0.05	1		not available
contig_0117401	contig_0117401	1..484	2.3	-0.68	-1.61	0.24	0.5	1	2.3	-2.89	-7.41	0.00617	0.03	1		PREDICTED: uncharacterized protein LOC106603904 isoform X3 [Salmo salar]
contig_0136433	contig_0136433	1..1327	1.76	-0.68	-1.61	0.1	0.32	1	1.76	-2.99	-7.95	8.97e-05	0.00109	1		PREDICTED: T-cell surface antigen CD2-like isoform X1 [Salmo salar]
contig_0003466	contig_0003466	1..1294	0.7	-0.7	-1.62	0.27	0.54	1	2.63	2.09	4.26	1.58e-06	3.35e-05	0.42		PREDICTED: hydroperoxide isomerase ALOXE3-like [Salmo salar]
contig_0026798	contig_0026798	1..867	2.2	-0.7	-1.62	0.13	0.36	1	2.2	-2.13	-4.38	0.00113	0.00879	1		PREDICTED: uncharacterized protein LOC106597293 [Salmo salar]
contig_0035897	contig_0035897	1..1958	0.97	-0.7	-1.62	0.13	0.36	1	0.97	-2.39	-5.24	0.000683	0.00583	1		PREDICTED: zinc finger BED domain-containing protein 1-like [Salmo salar]
contig_0049411	contig_0049411	1..2524	0.76	-0.7	-1.62	0.13	0.36	1	0.76	-3.66	-12.66	0.000404	0.00382	1		PREDICTED: venom factor-like, partial [Salmo salar]
contig_0043002	contig_0043002	1..203	8.34	-0.71	-1.63	0.14	0.38	1	8.34	-2.22	-4.66	0.00173	0.01	1		PREDICTED: CD44 antigen-like [Salmo salar]
contig_0068223	contig_0068223	1..1805	1	-0.7	-1.63	0.13	0.37	1	1	-2.62	-6.15	0.000695	0.00592	1		PREDICTED: uncharacterized protein LOC106566110 [Salmo salar]
contig_0119247	contig_0119247	1..2298	0.78	-0.7	-1.63	0.13	0.37	1	0.78	-2.05	-4.14	0.00181	0.01	1		PREDICTED: general transcription factor II-I repeat domain-containing protein 2-like [Salmo salar]
contig_0027759	contig_0027759	1..1824	0.87	-0.71	-1.64	0.15	0.4	1	0.87	-2.44	-5.43	0.0017	0.01	1		PREDICTED: cilia- and flagella-associated protein 57-like isoform X4 [Salmo salar]
contig_0038394	contig_0038394	1..806	8.28	-0.71	-1.64	0.00506	0.05	1	8.28	-2.83	-7.13	6.57e-11	3.73e-09	1.75e-05		not available
contig_0043108	contig_0043108	1..2646	2.94	-0.71	-1.64	0.00302	0.03	1	2.94	-2.37	-5.16	2.41e-11	1.49e-09	6.41e-06		PREDICTED: uncharacterized protein LOC106571320 [Salmo salar]
contig_0055310	contig_0055310	1..927	6	-0.72	-1.64	0.00885	0.07	1	6	-2.1	-4.3	4.36e-08	1.36e-06	0.01		PREDICTED: nuclear GTPase SLIP-GC-like isoform X2 [Salmo salar]
contig_0057824	contig_0057824	1..591	2.69	-0.71	-1.64	0.15	0.4	1	2.69	-2.13	-4.37	0.0028	0.02	1		PREDICTED: NACHT, LRR and PYD domains-containing protein 12-like [Salmo salar]
contig_0064899	contig_0064899	1..1434	1.11	-0.71	-1.64	0.15	0.4	1	1.11	-2.44	-5.43	0.0017	0.01	1		PREDICTED: rho guanine nucleotide exchange factor 17-like isoform X2 [Salmo salar]
contig_0074062	contig_0074062	1..1043	1.52	-0.71	-1.64	0.15	0.4	1	1.52	-2.13	-4.37	0.0028	0.02	1		PREDICTED: uncharacterized protein LOC106590369 [Salmo salar]
contig_0083393	contig_0083393	1..1713	0.93	-0.71	-1.64	0.15	0.4	1	0.93	-2.13	-4.37	0.0028	0.02	1		PREDICTED: coiled-coil domain-containing protein 102A-like isoform X2 [Salmo salar]
contig_0090346	contig_0090346	1..1556	2.18	-0.71	-1.64	0.05	0.21	1	2.18	-2.38	-5.21	9.94e-06	0.000167	1		PREDICTED: peroxisome proliferator-activated receptor gamma-like isoform X1 [Salmo salar]
contig_0039380	contig_0039380	1..1213	1.22	-0.72	-1.65	0.16	0.41	1	1.22	-2.03	-4.08	0.00456	0.03	1		not available
contig_0039944	contig_0039944	1..1301	1.67	-0.73	-1.65	0.1	0.31	1	1.67	-2.58	-5.96	0.000226	0.00236	1		not available
contig_0043632	contig_0043632	1..2900	0.51	-0.72	-1.65	0.16	0.41	1	0.51	-2.34	-5.07	0.00272	0.02	1		PREDICTED: UDP-N-acetylglucosamine transporter-like isoform X1 [Salmo salar]
contig_0044561	contig_0044561	1..1049	2.83	-0.72	-1.65	0.06	0.23	1	2.83	-2.19	-4.56	5.58e-05	0.000728	1		PREDICTED: LIX1-like protein [Salmo salar]
contig_0046502	contig_0046502	1..2085	4.19	-0.72	-1.65	0.00174	0.02	1	4.19	-2.28	-4.87	4.05e-12	2.86e-10	1.08e-06		PREDICTED: protein 4.1-like isoform X6 [Salmo salar]
contig_0068882	contig_0068882	1..5582	0.27	-0.72	-1.65	0.16	0.41	1	0.27	-2.03	-4.08	0.00456	0.03	1		PREDICTED: uncharacterized protein LOC106592539 [Salmo salar]
contig_0120067	contig_0120067	1..1560	2.92	-0.72	-1.65	0.02	0.1	1	2.92	-2.28	-4.87	7.46e-07	1.72e-05	0.2		not available
contig_0124756	contig_0124756	1..461	3.22	-0.72	-1.65	0.16	0.41	1	3.22	-2.74	-6.69	0.0018	0.01	1		PREDICTED: glycosyltransferase 8 domain-containing protein 2 [Salmo salar]
contig_0132059	contig_0132059	1..2303	0.64	-0.72	-1.65	0.16	0.41	1	0.64	-4.23	-18.71	0.00262	0.02	1		PREDICTED: LIM domain-binding protein 1-like isoform X8 [Salmo salar]
contig_0181765	contig_0181765	1..661	2.24	-0.72	-1.65	0.16	0.41	1	2.24	-2.74	-6.69	0.0018	0.01	1		not available
contig_0001832	contig_0001832	1..984	1.4	-0.73	-1.66	0.17	0.42	1	1.4	-2.64	-6.22	0.0028	0.02	1		Transposable element Tcb1 transposase [Salmo salar]
contig_0029587	contig_0029587	1..1716	0.8	-0.73	-1.66	0.17	0.42	1	0.8	-2.23	-4.71	0.00439	0.03	1		PREDICTED: receptor tyrosine-protein kinase erbB-4-like isoform X1 [Salmo salar]
contig_0074853	contig_0074853	1..623	2.21	-0.73	-1.66	0.17	0.42	1	2.21	-2.23	-4.71	0.00439	0.03	1		PREDICTED: upstream stimulatory factor 2-like [Salmo salar]
contig_0008245	contig_0008245	1..954	1.33	-0.74	-1.67	0.18	0.43	1	1.33	-2.12	-4.35	0.00719	0.04	1		PREDICTED: acidic leucine-rich nuclear phosphoprotein 32 family member B-like isoform X2 [Salmo salar]
contig_0020357	contig_0020357	1..1761	3.79	-0.74	-1.67	0.0039	0.04	1	3.79	-2.22	-4.65	1.23e-09	5.4e-08	0.000326		not available
contig_0021386	contig_0021386	1..2332	1.14	-0.74	-1.67	0.07	0.25	1	1.14	-2.19	-4.58	0.000127	0.00146	1		PREDICTED: transcription factor SOX-6-like isoform X2 [Salmo salar]
contig_0024824	contig_0024824	1..2961	1.09	-0.74	-1.67	0.05	0.2	1	1.09	-2.31	-4.97	1.88e-05	0.000287	1		Transposable element Tcb1 transposase [Salmo salar]
contig_0031034	contig_0031034	1..2381	1.4	-0.74	-1.67	0.04	0.2	1	1.4	-2.36	-5.13	1.23e-05	0.000199	1		PREDICTED: putative thiamine transporter SLC35F3 isoform X2 [Salmo salar]
contig_0052051	contig_0052051	1..1805	5.04	-0.74	-1.67	0.00108	0.02	1	5.04	-2.08	-4.24	1.17e-11	7.58e-10	3.11e-06		PREDICTED: uncharacterized protein LOC106595663 [Salmo salar]
contig_0054239	contig_0054239	1..329	9.82	-0.74	-1.67	0.05	0.2	1	9.82	-4.42	-21.43	1.58e-05	0.000247	1		Lipoma HMGIC fusion partner-like 4 protein [Salmo salar]
contig_0073092	contig_0073092	1..1743	0.73	-0.74	-1.67	0.18	0.43	1	0.73	-2.12	-4.35	0.00719	0.04	1		PREDICTED: serine-rich adhesin for platelets-like [Salmo salar]
contig_0108450	contig_0108450	1..1978	1.28	-0.74	-1.67	0.07	0.25	1	1.28	-2.14	-4.4	0.000199	0.00212	1		not available
contig_0117276	contig_0117276	1..1034	1.23	-0.74	-1.67	0.18	0.43	1	1.23	-4	-16.05	0.00447	0.03	1		PREDICTED: myotubularin-related protein 5-like isoform X5 [Salmo salar]
contig_0133267	contig_0133267	1..2096	0.61	-0.74	-1.67	0.18	0.43	1	0.61	-3.08	-8.46	0.00332	0.02	1		PREDICTED: fibroblast growth factor 4B-like [Salmo salar]
contig_0146172	contig_0146172	1..1064	1.19	-0.74	-1.67	0.18	0.43	1	1.19	-2.52	-5.74	0.00441	0.03	1		not available
contig_0005416	contig_0005416	1..277	15.1	-0.75	-1.68	0.03	0.14	1	15.1	-2.4	-5.28	1.16e-06	2.55e-05	0.31		PREDICTED: LOW QUALITY PROTEIN: neuroblast differentiation-associated protein AHNAK-like [Salmo salar]
contig_0009960	contig_0009960	1..483	3.62	-0.75	-1.68	0.12	0.34	1	3.62	-2.26	-4.8	0.00137	0.01	1		Transposable element Tcb1 transposase [Salmo salar]
contig_0021591	contig_0021591	1..1750	5.84	-0.75	-1.68	0.000554	0.00982	1	5.84	-2.2	-4.6	2.67e-13	2.28e-11	7.1e-08		PREDICTED: cell surface glycoprotein 1-like [Salmo salar]
contig_0022800	contig_0022800	1..240	4.85	-0.75	-1.68	0.19	0.45	1	4.85	-2.4	-5.27	0.00709	0.04	1		PREDICTED: ral GTPase-activating protein subunit alpha-1-like isoform X2 [Salmo salar]
contig_0043373	contig_0043373	1..355	3.28	-0.75	-1.68	0.19	0.45	1	3.28	-2.96	-7.76	0.005	0.03	1		PREDICTED: zinc finger MYM-type protein 1-like isoform X1 [Salmo salar]
contig_0046580	contig_0046580	1..333	3.5	-0.75	-1.68	0.19	0.45	1	3.5	-2.4	-5.27	0.00709	0.04	1		PREDICTED: cohesin subunit SA-2-like isoform X1 [Salmo salar]
contig_0058031	contig_0058031	1..1761	1.05	-0.74	-1.68	0.11	0.33	1	1.05	-2.35	-5.09	0.000859	0.00704	1		PREDICTED: Krueppel-like factor 15 [Salmo salar]
contig_0062953	contig_0062953	1..873	1.33	-0.75	-1.68	0.19	0.45	1	1.33	-2.96	-7.76	0.005	0.03	1		Deoxyribonuclease gamma precursor [Salmo salar]
contig_0069015	contig_0069015	1..432	4.04	-0.75	-1.68	0.12	0.34	1	4.04	-2.26	-4.8	0.00137	0.01	1		hypothetical protein [Salmo salar]
contig_0071041	contig_0071041	1..1116	2.8	-0.74	-1.68	0.05	0.21	1	2.8	-3.81	-14.07	8.43e-06	0.000144	1		PREDICTED: uncharacterized protein LOC106565892 [Salmo salar]
contig_0080078	contig_0080078	1..1851	0.63	-0.75	-1.68	0.19	0.45	1	0.63	-2.4	-5.27	0.00709	0.04	1		PREDICTED: olfactory receptor 11A1-like [Salmo salar]
contig_0096810	contig_0096810	1..807	2.3	-0.74	-1.68	0.11	0.33	1	2.3	-2.35	-5.09	0.000859	0.00704	1		PREDICTED: autism susceptibility gene 2 protein-like isoform X4 [Salmo salar]
contig_0115095	contig_0115095	1..560	2.08	-0.75	-1.68	0.19	0.45	1	2.08	-2.96	-7.76	0.005	0.03	1		not available
contig_0207201	contig_0207201	1..1209	0.96	-0.75	-1.68	0.19	0.45	1	0.96	-3.88	-14.72	0.00598	0.03	1		not available
contig_0004672	contig_0004672	1..2187	1.02	-0.76	-1.69	0.08	0.28	1	1.02	-2.13	-4.39	0.000467	0.0043	1		PREDICTED: insulin-like growth factor 2 mRNA-binding protein 3 isoform X1 [Salmo salar]
contig_0040377	contig_0040377	1..742	3.92	-0.75	-1.69	0.05	0.21	1	3.92	-2.52	-5.74	2.65e-05	0.000386	1		reverse transcriptase-like protein [Salmo salar]
contig_0047592	contig_0047592	1..433	5.38	-0.75	-1.69	0.08	0.27	1	5.38	-2.68	-6.39	0.000119	0.00139	1		Phosphatidylserine decarboxylase proenzyme [Salmo salar]
contig_0062537	contig_0062537	1..3045	1.15	-0.75	-1.69	0.04	0.18	1	1.15	-3	-8.01	2.17e-06	4.42e-05	0.58		PREDICTED: ephrin type-B receptor 1 isoform X1 [Salmo salar]
contig_0066087	contig_0066087	1..1048	3.89	-0.76	-1.69	0.03	0.15	1	3.89	-2.36	-5.14	1.74e-06	3.66e-05	0.46		not available
contig_0088136	contig_0088136	1..914	3.19	-0.75	-1.69	0.05	0.21	1	3.19	-2.33	-5.03	4.21e-05	0.000572	1		not available
contig_0010134	contig_0010134	1..1597	1.03	-0.76	-1.7	0.12	0.35	1	1.03	-2.17	-4.51	0.0022	0.01	1		PREDICTED: purine nucleoside phosphorylase-like [Salmo salar]
contig_0010354	contig_0010354	1..2414	1.56	-0.77	-1.7	0.03	0.15	1	1.56	-2.38	-5.21	3.71e-06	7.05e-05	0.99		PREDICTED: inositol 1,4,5-trisphosphate receptor type 1-like isoform X16 [Salmo salar]
contig_0054576	contig_0054576	1..1662	2.55	-0.77	-1.7	0.02	0.13	1	2.55	-2.7	-6.51	3.95e-07	9.82e-06	0.11		not available
contig_0055405	contig_0055405	1..470	3.49	-0.76	-1.7	0.12	0.35	1	3.49	-4.37	-20.71	0.00182	0.01	1		Transposable element Tcb1 transposase [Salmo salar]
contig_0061278	contig_0061278	1..249	4.25	-0.76	-1.7	0.2	0.47	1	4.25	-3.74	-13.39	0.00815	0.04	1		PREDICTED: uncharacterized protein LOC106601778 [Salmo salar]
contig_0062045	contig_0062045	1..651	5.04	-0.76	-1.7	0.04	0.18	1	5.04	-2.19	-4.55	2.51e-05	0.000368	1		PREDICTED: histone-lysine N-methyltransferase 2B-like isoform X3 [Salmo salar]
contig_0068804	contig_0068804	1..999	2.12	-0.77	-1.7	0.08	0.29	1	2.12	-2.06	-4.18	0.000744	0.00625	1		PREDICTED: unconventional myosin-XVIIIa-like isoform X12 [Salmo salar]
contig_0089209	contig_0089209	1..1050	4.23	-0.76	-1.7	0.01	0.09	1	4.23	-2.14	-4.42	1.87e-06	3.9e-05	0.5		PREDICTED: carboxypeptidase Q-like isoform X1 [Salmo salar]
contig_0107078	contig_0107078	1..1142	0.93	-0.76	-1.7	0.2	0.47	1	0.93	-2.82	-7.06	0.00767	0.04	1		not available
contig_0107273	contig_0107273	1..802	1.32	-0.76	-1.7	0.2	0.47	1	1.32	-2.82	-7.06	0.00767	0.04	1		not available
contig_0120820	contig_0120820	1..364	11.63	-0.77	-1.7	0.02	0.13	1	11.63	-2.07	-4.21	4.3e-06	8.03e-05	1		PREDICTED: zinc finger protein 771-like [Salmo salar]
contig_0027274	contig_0027274	1..4472	0.69	-0.77	-1.71	0.04	0.19	1	0.69	-2.6	-6.05	1.42e-05	0.000226	1		PREDICTED: ligand-dependent corepressor-like [Salmo salar]
contig_0027766	contig_0027766	1..2174	2.39	-0.77	-1.71	0.00672	0.06	1	2.39	-2.17	-4.51	3.06e-07	7.8e-06	0.08		PREDICTED: solute carrier family 45 member 4-like [Salmo salar]
contig_0065755	contig_0065755	1..698	2.2	-0.77	-1.71	0.13	0.36	1	2.2	-2.08	-4.22	0.00357	0.02	1		transposase [Salmo salar]
contig_0079913	contig_0079913	1..1237	2.1	-0.77	-1.71	0.06	0.23	1	2.1	-2.83	-7.12	4.31e-05	0.000583	1		PREDICTED: AMME syndrome candidate gene 1 protein-like [Salmo salar]
contig_0093886	contig_0093886	1..788	1.95	-0.77	-1.71	0.13	0.36	1	1.95	-2.08	-4.22	0.00357	0.02	1		PREDICTED: E3 ubiquitin/ISG15 ligase TRIM25-like [Salmo salar]
contig_0094102	contig_0094102	1..1657	3.19	-0.77	-1.71	0.00646	0.06	1	3.19	-2.74	-6.68	1.97e-08	6.63e-07	0.00524		PREDICTED: trinucleotide repeat-containing gene 6C protein-like isoform X6 [Salmo salar]
contig_0110384	contig_0110384	1..983	4.79	-0.77	-1.71	0.00939	0.07	1	4.79	-2.13	-4.37	1.12e-06	2.48e-05	0.3		PREDICTED: testosterone 17-beta-dehydrogenase 3 isoform X1 [Salmo salar]
contig_0125709	contig_0125709	1..786	1.95	-0.77	-1.71	0.13	0.36	1	1.95	-2.39	-5.25	0.00215	0.01	1		PREDICTED: GTPase-activating Rap/Ran-GAP domain-like protein 3 isoform X1 [Salmo salar]
contig_0133838	contig_0133838	1..2389	0.64	-0.77	-1.71	0.13	0.36	1	0.64	-2.39	-5.25	0.00215	0.01	1		not available
contig_0189981	contig_0189981	1..1232	0.39	-0.77	-1.71	0.38	NaN	1	1.84	2.42	5.34	1.7e-05	0.000263	1		not available
contig_0014414	contig_0014414	1..1730	0.83	-0.78	-1.72	0.14	0.38	1	0.83	-2.69	-6.46	0.00224	0.02	1		PREDICTED: E3 ubiquitin-protein ligase NEURL1 [Salmo salar]
contig_0020328	contig_0020328	1..2789	2.16	-0.78	-1.72	0.0037	0.04	1	2.16	-2.15	-4.42	9.99e-09	3.61e-07	0.00266		PREDICTED: proteoglycan 4-like, partial [Salmo salar]
contig_0037747	contig_0037747	1..1903	1.5	-0.79	-1.72	0.05	0.2	1	1.5	-2.14	-4.4	8.69e-05	0.00106	1		PREDICTED: interleukin-3 receptor class 2 subunit beta-like isoform X2 [Salmo salar]
contig_0042924	contig_0042924	1..1377	2.08	-0.79	-1.72	0.05	0.2	1	2.08	-4.25	-18.97	3.51e-05	0.000489	1		PREDICTED: uncharacterized protein LOC106565145 isoform X1 [Salmo salar]
contig_0066336	contig_0066336	1..1314	2.26	-0.78	-1.72	0.04	0.2	1	2.26	-2.04	-4.11	9.39e-05	0.00113	1		PREDICTED: homeobox protein Dlx4a-like [Salmo salar]
contig_0079514	contig_0079514	1..771	1.85	-0.78	-1.72	0.14	0.38	1	1.85	-2.69	-6.46	0.00224	0.02	1		PREDICTED: CKLF-like MARVEL transmembrane domain-containing protein 4 isoform X1 [Salmo salar]
contig_0096630	contig_0096630	1..393	6.06	-0.79	-1.72	0.06	0.24	1	6.06	-2.04	-4.12	0.000395	0.00376	1		PREDICTED: transcription factor HIVEP2 [Salmo salar]
contig_0004138	contig_0004138	1..1113	2.47	-0.79	-1.73	0.05	0.21	1	2.47	-2.44	-5.43	5.02e-05	0.000665	1		PREDICTED: centriole, cilia and spindle-associated protein-like isoform X1 [Salmo salar]
contig_0022085	contig_0022085	1..868	9.09	-0.79	-1.73	0.00103	0.02	1	9.09	-2.14	-4.4	1.12e-10	6.06e-09	2.99e-05		PREDICTED: LOW QUALITY PROTEIN: E3 ubiquitin-protein ligase RNF213-like [Salmo salar]
contig_0030319	contig_0030319	1..6008	2.06	-0.79	-1.73	0.000116	0.00284	1	2.06	-2.11	-4.32	7.42e-15	8.08e-13	1.98e-09		PREDICTED: histone-lysine N-methyltransferase 2A isoform X2 [Salmo salar]
contig_0034119	contig_0034119	1..304	46.67	-0.79	-1.73	5.33e-05	0.0015	1	46.67	-2.14	-4.4	1.36e-16	1.9e-14	3.62e-11		PREDICTED: DDB1- and CUL4-associated factor 5-like, partial [Salmo salar]
contig_0076760	contig_0076760	1..428	7.79	-0.79	-1.73	0.03	0.17	1	7.79	-2.21	-4.62	2.02e-05	0.000305	1		not available
contig_0004327	contig_0004327	1..2044	2.82	-0.8	-1.74	0.00351	0.04	1	2.82	-2.16	-4.46	1.81e-08	6.14e-07	0.00481		PREDICTED: uncharacterized protein LOC106581772, partial [Salmo salar]
contig_0029344	contig_0029344	1..2427	1.09	-0.8	-1.74	0.05	0.21	1	1.09	-2.03	-4.08	0.000214	0.00226	1		PREDICTED: forkhead box protein G1 [Salmo salar]
contig_0037714	contig_0037714	1..512	2.58	-0.8	-1.74	0.15	0.39	1	2.58	-2.18	-4.53	0.00561	0.03	1		PREDICTED: probable E3 ubiquitin-protein ligase HECTD4 isoform X7 [Salmo salar]
contig_0041883	contig_0041883	1..927	1.43	-0.8	-1.74	0.15	0.39	1	1.43	-2.18	-4.53	0.00561	0.03	1		not available
contig_0059373	contig_0059373	1..868	2.07	-0.8	-1.74	0.1	0.31	1	2.07	-2.05	-4.14	0.00181	0.01	1		PREDICTED: F-box only protein 8-like isoform X1 [Salmo salar]
contig_0073069	contig_0073069	1..661	2	-0.8	-1.74	0.15	0.39	1	2	-2.58	-5.98	0.00351	0.02	1		PREDICTED: uncharacterized protein LOC106591608 isoform X3 [Salmo salar]
contig_0110925	contig_0110925	1..2605	0.69	-0.8	-1.74	0.1	0.31	1	0.69	-3.02	-8.12	0.000524	0.00471	1		PREDICTED: voltage-dependent calcium channel subunit alpha-2/delta-2-like [Salmo salar]
contig_0118934	contig_0118934	1..940	1.41	-0.8	-1.74	0.15	0.39	1	1.41	-2.18	-4.53	0.00561	0.03	1		not available
contig_0124895	contig_0124895	1..1227	1.47	-0.8	-1.74	0.1	0.31	1	1.47	-2.05	-4.14	0.00181	0.01	1		not available
contig_0144390	contig_0144390	1..1227	1.47	-0.8	-1.74	0.1	0.31	1	1.47	-2.31	-4.95	0.00108	0.00849	1		not available
contig_0012695	contig_0012695	1..3362	10.49	-0.81	-1.75	1.13e-07	7.06e-06	0.03	10.49	-12.08	-4325.64	0.0047	0.03	1		hypothetical protein [Salmo salar]
contig_0060492	contig_0060492	1..2929	0.58	-0.81	-1.75	0.1	0.32	1	0.58	-2.22	-4.66	0.00173	0.01	1		not available
contig_0068543	contig_0068543	1..2152	2.41	-0.81	-1.75	0.00499	0.05	1	2.41	-2.85	-7.19	1.97e-08	6.63e-07	0.00524		PREDICTED: potassium channel subfamily T member 2-like, partial [Salmo salar]
contig_0077111	contig_0077111	1..3170	1.37	-0.81	-1.75	0.00935	0.07	1	1.37	-2.33	-5.02	1.02e-06	2.29e-05	0.27		PREDICTED: mitochondrial glutamate carrier 1-like [Salmo salar]
contig_0079068	contig_0079068	1..4562	0.37	-0.81	-1.75	0.1	0.32	1	0.37	-2.22	-4.66	0.00173	0.01	1		PREDICTED: protocadherin Fat 3 isoform X4 [Salmo salar]
contig_0107288	contig_0107288	1..1751	1.45	-0.81	-1.75	0.05	0.21	1	1.45	-2.33	-5.01	0.00012	0.00139	1		PREDICTED: sphingosine-1-phosphate phosphatase 2-like isoform X1 [Salmo salar]
contig_0108092	contig_0108092	1..707	2.4	-0.81	-1.75	0.1	0.32	1	2.4	-2.53	-5.79	0.00108	0.00849	1		NIF3-like protein 1 [Salmo salar]
contig_0010351	contig_0010351	1..214	217.44	-0.81	-1.76	1.64e-08	1.2e-06	0.00447	217.44	-12.48	-5708.78	0.00349	0.02	1		PREDICTED: keratin-associated protein 5-4-like [Salmo salar]
contig_0019983	contig_0019983	1..4375	3.28	-0.82	-1.76	2.89e-05	0.000898	1	3.28	-2.22	-4.66	2.81e-17	4.28e-15	7.48e-12		PREDICTED: fibronectin type-III domain-containing protein 3A-like, partial [Salmo salar]
contig_0022464	contig_0022464	1..353	29.84	-0.81	-1.76	0.000189	0.0042	1	29.84	-2.2	-4.59	1.32e-13	1.17e-11	3.51e-08		PREDICTED: interferon-induced very large GTPase 1-like [Salmo salar]
contig_0032333	contig_0032333	1..886	1.37	-0.81	-1.76	0.15	0.4	1	1.37	-2.06	-4.17	0.00925	0.05	1		PREDICTED: uncharacterized protein LOC106600457 [Salmo salar]
contig_0045053	contig_0045053	1..2294	2.38	-0.81	-1.76	0.00391	0.04	1	2.38	-2.66	-6.31	1.69e-08	5.78e-07	0.0045		not available
contig_0046264	contig_0046264	1..880	3.31	-0.81	-1.76	0.04	0.18	1	3.31	-3	-7.99	1.35e-05	0.000217	1		PREDICTED: homeobox protein Dlx3b-like isoform X2 [Salmo salar]
contig_0049169	contig_0049169	1..4517	1.58	-0.81	-1.76	0.00128	0.02	1	1.58	-3.81	-14.07	1.66e-11	1.05e-09	4.41e-06		PREDICTED: receptor-type tyrosine-protein phosphatase R [Salmo salar]
contig_0060017	contig_0060017	1..954	9.93	-0.82	-1.76	0.000308	0.00621	1	9.93	-2.09	-4.27	4.59e-12	3.22e-10	1.22e-06		PREDICTED: plectin-like isoform X9 [Salmo salar]
contig_0079505	contig_0079505	1..1481	3.11	-0.81	-1.76	0.00722	0.06	1	3.11	-2	-4.01	2.85e-06	5.59e-05	0.76		not available
contig_0083693	contig_0083693	1..1131	1.08	-0.81	-1.76	0.15	0.4	1	1.08	-2.46	-5.5	0.00558	0.03	1		PREDICTED: uncharacterized protein LOC106609103 isoform X4 [Salmo salar]
contig_0090259	contig_0090259	1..1548	0.79	-0.81	-1.76	0.15	0.4	1	0.79	-3.02	-8.11	0.00406	0.02	1		PREDICTED: uncharacterized protein LOC106569460 isoform X1 [Salmo salar]
contig_0092346	contig_0092346	1..651	1.87	-0.81	-1.76	0.15	0.4	1	1.87	-3.02	-8.11	0.00406	0.02	1		not available
contig_0098328	contig_0098328	1..306	3.98	-0.81	-1.76	0.15	0.4	1	3.98	-2.06	-4.17	0.00925	0.05	1		PREDICTED: cohesin subunit SA-1-like, partial [Salmo salar]
contig_0107299	contig_0107299	1..437	2.79	-0.81	-1.76	0.15	0.4	1	2.79	-2.06	-4.17	0.00925	0.05	1		not available
contig_0126348	contig_0126348	1..848	1.44	-0.81	-1.76	0.15	0.4	1	1.44	-2.06	-4.17	0.00925	0.05	1		PREDICTED: two pore calcium channel protein 2-like [Salmo salar]
contig_0136969	contig_0136969	1..676	1.8	-0.81	-1.76	0.15	0.4	1	1.8	-3.02	-8.11	0.00406	0.02	1		chitinase domain containing 1-like [Salmo salar]
contig_0144869	contig_0144869	1..1135	1.07	-0.81	-1.76	0.15	0.4	1	1.07	-3.94	-15.39	0.00516	0.03	1		not available
contig_0001689	contig_0001689	1..1364	1.71	-0.83	-1.77	0.06	0.22	1	1.71	-2.68	-6.39	0.000119	0.00139	1		PREDICTED: uncharacterized protein K02A2.6 [Salmo salar]
contig_0048848	contig_0048848	1..1933	15.09	-0.82	-1.77	2.43e-07	1.41e-05	0.07	15.09	-2.61	-6.08	9.82e-33	6.6e-30	2.61e-27		UPF0527 membrane protein [Salmo salar]
contig_0067629	contig_0067629	1..1625	1.21	-0.82	-1.77	0.08	0.27	1	1.21	-2.17	-4.5	0.00089	0.00724	1		PREDICTED: Fanconi anemia group G protein isoform X1 [Salmo salar]
contig_0098070	contig_0098070	1..1333	1.19	-0.82	-1.77	0.11	0.33	1	1.19	-3.4	-10.56	0.00109	0.00852	1		not available
contig_0103073	contig_0103073	1..1456	1.35	-0.82	-1.77	0.08	0.27	1	1.35	-2.17	-4.5	0.00089	0.00724	1		ORF2 protein [Salmo salar]
contig_0009677	contig_0009677	1..566	1.96	-0.83	-1.78	0.16	0.41	1	1.96	-2.33	-5.03	0.00904	0.04	1		PREDICTED: uncharacterized protein LOC106569078 [Salmo salar]
contig_0014534	contig_0014534	1..669	1.66	-0.83	-1.78	0.16	0.41	1	1.66	-2.89	-7.41	0.00617	0.03	1		PREDICTED: amyloid beta A4 precursor protein-binding family B member 1-like isoform X1 [Salmo salar]
contig_0019412	contig_0019412	1..1063	6.47	-0.83	-1.78	0.00119	0.02	1	6.47	-2.19	-4.57	8.55e-10	3.86e-08	0.000228		not available
contig_0034905	contig_0034905	1..419	2.65	-0.83	-1.78	0.16	0.41	1	2.65	-2.89	-7.41	0.00617	0.03	1		PREDICTED: gamma-aminobutyric acid receptor subunit beta-4-like isoform X1 [Salmo salar]
contig_0062579	contig_0062579	1..1543	0.96	-0.84	-1.78	0.11	0.34	1	0.96	-4.23	-18.71	0.00262	0.02	1		PREDICTED: uncharacterized protein LOC106605384, partial [Salmo salar]
contig_0064834	contig_0064834	1..1209	1.23	-0.84	-1.78	0.11	0.34	1	1.23	-2.03	-4.08	0.00456	0.03	1		PREDICTED: uncharacterized protein LOC106611174 [Salmo salar]
contig_0070694	contig_0070694	1..347	3.2	-0.83	-1.78	0.16	0.41	1	3.2	-2.33	-5.03	0.00904	0.04	1		PREDICTED: protocadherin gamma-A11-like, partial [Salmo salar]
contig_0099065	contig_0099065	1..775	1.43	-0.83	-1.78	0.16	0.41	1	1.43	-2.89	-7.41	0.00617	0.03	1		PREDICTED: protocadherin Fat 3-like, partial [Salmo salar]
contig_0102773	contig_0102773	1..564	1.97	-0.83	-1.78	0.16	0.41	1	1.97	-2.89	-7.41	0.00617	0.03	1		PREDICTED: striatin-4-like isoform X1 [Salmo salar]
contig_0125226	contig_0125226	1..473	2.35	-0.83	-1.78	0.16	0.41	1	2.35	-2.33	-5.03	0.00904	0.04	1		PREDICTED: microtubule-actin cross-linking factor 1-like isoform X27 [Salmo salar]
contig_0129421	contig_0129421	1..940	1.18	-0.83	-1.78	0.16	0.41	1	1.18	-2.33	-5.03	0.00904	0.04	1		not available
contig_0136017	contig_0136017	1..1544	0.72	-0.83	-1.78	0.16	0.41	1	0.72	-2.33	-5.03	0.00904	0.04	1		PREDICTED: uncharacterized protein LOC106597293 [Salmo salar]
contig_0036310	contig_0036310	1..2341	0.79	-0.84	-1.79	0.08	0.28	1	0.79	-2.66	-6.33	0.00056	0.00496	1		PREDICTED: UDP-N-acetylglucosamine transporter-like isoform X3 [Salmo salar]
contig_0040360	contig_0040360	1..276	21.87	-0.84	-1.79	0.00206	0.03	1	21.87	-2.93	-7.61	3.78e-10	1.85e-08	0.000101		PREDICTED: DNA-directed RNA polymerase II subunit RPB1-like [Salmo salar]
contig_0086069	contig_0086069	1..346	17.44	-0.84	-1.79	0.00206	0.03	1	17.44	-2.93	-7.61	3.78e-10	1.85e-08	0.000101		PREDICTED: collagen alpha-4(IV) chain-like isoform X2 [Salmo salar]
contig_0097510	contig_0097510	1..2969	1.12	-0.84	-1.79	0.02	0.14	1	1.12	-2.53	-5.76	7.75e-06	0.000135	1		Transposable element Tcb1 transposase [Salmo salar]
contig_0110383	contig_0110383	1..979	3.41	-0.84	-1.79	0.02	0.14	1	3.41	-2.94	-7.65	3.79e-06	7.18e-05	1		PREDICTED: testosterone 17-beta-dehydrogenase 3 isoform X1 [Salmo salar]
contig_0115799	contig_0115799	1..2070	1.43	-0.84	-1.79	0.03	0.16	1	1.43	-2.04	-4.11	9.39e-05	0.00113	1		not available
contig_0130410	contig_0130410	1..618	4.8	-0.84	-1.79	0.03	0.16	1	4.8	-3.02	-8.13	1.12e-05	0.000185	1		PREDICTED: kinesin-like protein KIF1C, partial [Salmo salar]
contig_0134162	contig_0134162	1..927	2	-0.84	-1.79	0.08	0.28	1	2	-2.66	-6.33	0.00056	0.00496	1		PREDICTED: striatin-4-like isoform X1 [Salmo salar]
contig_0141610	contig_0141610	1..393	7.54	-0.84	-1.79	0.03	0.16	1	7.54	-2.04	-4.11	9.39e-05	0.00113	1		PREDICTED: zinc finger and BTB domain-containing protein 7A-like [Salmo salar]
contig_0152991	contig_0152991	1..476	5.45	-0.84	-1.79	0.04	0.19	1	5.45	-2.36	-5.12	9.63e-05	0.00115	1		PREDICTED: leucine-rich repeat extensin-like protein 5 [Salmo salar]
contig_0021754	contig_0021754	1..374	5.66	-0.85	-1.8	0.06	0.23	1	5.66	-2.85	-7.23	0.000197	0.00211	1		Na,K-ATPase alpha 1 isoform, partial [Salmo salar]
contig_0034481	contig_0034481	1..1028	11.95	-0.85	-1.8	4.35e-05	0.00126	1	11.95	-2.72	-6.59	1.49e-17	2.35e-15	3.95e-12		PREDICTED: THO complex subunit 3 [Salmo salar]
contig_0039027	contig_0039027	1..882	8.46	-0.85	-1.8	0.000656	0.01	1	8.46	-2	-4	1.02e-09	4.56e-08	0.000272		Transposable element Tcb2 transposase [Salmo salar]
contig_0043184	contig_0043184	1..286	8.7	-0.85	-1.8	0.04	0.2	1	8.7	-2.77	-6.83	6.44e-05	0.000822	1		not available
contig_0052404	contig_0052404	1..1320	3.29	-0.85	-1.8	0.0068	0.06	1	3.29	-2.59	-6.02	4.03e-07	1e-05	0.11		PREDICTED: calcium homeostasis endoplasmic reticulum protein isoform X3 [Salmo salar]
contig_0054910	contig_0054910	1..2939	4.05	-0.85	-1.8	5.23e-05	0.00148	1	4.05	-2.17	-4.49	9.45e-15	1.01e-12	2.52e-09		ORF2 protein [Salmo salar]
contig_0072522	contig_0072522	1..4384	0.97	-0.85	-1.8	0.01	0.09	1	0.97	-2.42	-5.34	9.46e-07	2.13e-05	0.25		not available
contig_0102083	contig_0102083	1..364	4.8	-0.85	-1.8	0.08	0.28	1	4.8	-2.58	-5.97	0.000866	0.00709	1		not available
contig_0103119	contig_0103119	1..851	2.92	-0.85	-1.8	0.04	0.2	1	2.92	-3.09	-8.49	5.09e-05	0.000673	1		PREDICTED: uncharacterized protein LOC106605365 [Salmo salar]
contig_0122477	contig_0122477	1..771	2.27	-0.85	-1.8	0.08	0.28	1	2.27	-2.01	-4.02	0.00231	0.02	1		Transposable element Tcb1 transposase [Salmo salar]
contig_0143832	contig_0143832	1..918	2.31	-0.85	-1.8	0.06	0.23	1	2.31	-2.28	-4.86	0.000444	0.00413	1		PREDICTED: neurotrophin receptor-interacting factor 1-like isoform X1 [Salmo salar]
contig_0159443	contig_0159443	1..213	13.42	-0.85	-1.8	0.03	0.17	1	13.42	-2.31	-4.94	5.23e-05	0.000689	1		PREDICTED: Fanconi anemia-associated protein of 100 kDa isoform X2 [Salmo salar]
contig_0009414	contig_0009414	1..1373	0.73	-0.86	-1.81	0.17	0.42	1	0.73	-2.75	-6.71	0.00958	0.05	1		PREDICTED: uncharacterized protein LOC106597293 [Salmo salar]
contig_0038204	contig_0038204	1..1400	1.97	-0.86	-1.81	0.03	0.17	1	1.97	-3.23	-9.39	2.06e-05	0.000311	1		PREDICTED: low-density lipoprotein receptor-related protein 1-like isoform X1 [Salmo salar]
contig_0049268	contig_0049268	1..1120	3.36	-0.86	-1.81	0.02	0.11	1	3.36	-2.12	-4.35	1.02e-05	0.00017	1		PREDICTED: acidic leucine-rich nuclear phosphoprotein 32 family member B-like isoform X1 [Salmo salar]
contig_0074892	contig_0074892	1..232	4.34	-0.86	-1.81	0.17	0.42	1	4.34	-3.67	-12.73	0.00959	0.05	1		PREDICTED: transcriptional enhancer factor TEF-1 isoform X2 [Salmo salar]
contig_0092440	contig_0092440	1..1709	0.59	-0.86	-1.81	0.17	0.42	1	0.59	-3.67	-12.73	0.00959	0.05	1		PREDICTED: calcium-activated potassium channel subunit alpha-1-like isoform X2 [Salmo salar]
contig_0122159	contig_0122159	1..509	6.86	-0.85	-1.81	0.02	0.12	1	6.86	-2.02	-4.04	2.98e-05	0.000425	1		PREDICTED: neuropathy target esterase-like isoform X6 [Salmo salar]
contig_0141189	contig_0141189	1..279	3.61	-0.86	-1.81	0.17	0.42	1	3.61	-2.75	-6.71	0.00958	0.05	1		PREDICTED: receptor-type tyrosine-protein phosphatase T-like isoform X7 [Salmo salar]
contig_0149646	contig_0149646	1..1170	2.04	-0.86	-1.81	0.05	0.2	1	2.04	-3.42	-10.74	7.2e-05	0.000901	1		PREDICTED: uncharacterized protein LOC106578354 [Salmo salar]
contig_0024314	contig_0024314	1..543	3.7	-0.86	-1.82	0.06	0.24	1	3.7	-2.47	-5.52	0.000436	0.00406	1		PREDICTED: integrin beta-1-like isoform X2 [Salmo salar]
contig_0034094	contig_0034094	1..1867	7	-0.87	-1.82	2.06e-05	0.000676	1	7	-2.56	-5.88	7.71e-18	1.25e-15	2.05e-12		not available
contig_0048576	contig_0048576	1..2051	2.27	-0.87	-1.82	0.00438	0.04	1	2.27	-2.21	-4.63	8.24e-07	1.88e-05	0.22		PREDICTED: bromodomain-containing protein 1-like, partial [Salmo salar]
contig_0054272	contig_0054272	1..426	3.85	-0.87	-1.82	0.09	0.29	1	3.85	-2.17	-4.51	0.0022	0.01	1		PREDICTED: arrestin red cell isoform 1 isoform X3 [Salmo salar]
contig_0065834	contig_0065834	1..1306	3.36	-0.86	-1.82	0.00566	0.05	1	3.36	-2.47	-5.54	5.17e-07	1.24e-05	0.14		PREDICTED: tissue alpha-L-fucosidase-like [Salmo salar]
contig_0097899	contig_0097899	1..1280	1.28	-0.87	-1.82	0.09	0.29	1	1.28	-2.17	-4.51	0.0022	0.01	1		PREDICTED: AT-rich interactive domain-containing protein 1B-like isoform X2 [Salmo salar]
contig_0141562	contig_0141562	1..255	6.44	-0.87	-1.82	0.09	0.29	1	6.44	-2.49	-5.61	0.00136	0.01	1		PREDICTED: angiomotin-like 2a [Salmo salar]
contig_0222181	contig_0222181	1..343	4.78	-0.87	-1.82	0.09	0.29	1	4.78	-2.89	-7.41	0.000957	0.00769	1		PREDICTED: uncharacterized protein LOC106600668 [Salmo salar]
contig_0037744	contig_0037744	1..1614	0.79	-0.88	-1.83	0.12	0.35	1	0.79	-3.08	-8.46	0.00332	0.02	1		PREDICTED: uncharacterized protein LOC106600457 [Salmo salar]
contig_0041977	contig_0041977	1..1704	5.93	-0.87	-1.83	9.08e-05	0.00233	1	5.93	-2.75	-6.71	4.31e-15	4.89e-13	1.15e-09		PREDICTED: plectin-like [Salmo salar]
contig_0042948	contig_0042948	1..525	2.42	-0.88	-1.83	0.12	0.35	1	2.42	-4	-16.05	0.00447	0.03	1		UPF0527 membrane protein [Salmo salar]
contig_0056923	contig_0056923	1..878	1.45	-0.88	-1.83	0.12	0.35	1	1.45	-2.52	-5.74	0.00441	0.03	1		Probable E3 ubiquitin-protein ligase HECTD2 [Salmo salar]
contig_0071044	contig_0071044	1..482	2.64	-0.88	-1.83	0.12	0.35	1	2.64	-2.12	-4.35	0.00719	0.04	1		olfactory receptor family C subfamily 4 member 9 [Salmo salar]
contig_0081782	contig_0081782	1..1448	1.57	-0.87	-1.83	0.05	0.21	1	1.57	-2.64	-6.25	0.000147	0.00166	1		PREDICTED: zinc finger protein 431-like isoform X14 [Salmo salar]
contig_0083407	contig_0083407	1..1377	0.92	-0.88	-1.83	0.12	0.35	1	0.92	-2.12	-4.35	0.00719	0.04	1		not available
contig_0100912	contig_0100912	1..359	3.54	-0.88	-1.83	0.12	0.35	1	3.54	-4	-16.05	0.00447	0.03	1		not available
contig_0101956	contig_0101956	1..1925	0.66	-0.88	-1.83	0.12	0.35	1	0.66	-2.12	-4.35	0.00719	0.04	1		PREDICTED: LOW QUALITY PROTEIN: type I inositol 3,4-bisphosphate 4-phosphatase-like [Salmo salar]
contig_0131564	contig_0131564	1..1569	0.81	-0.88	-1.83	0.12	0.35	1	0.81	-2.12	-4.35	0.00719	0.04	1		not available
contig_0024366	contig_0024366	1..1736	3.29	-0.88	-1.84	0.00165	0.02	1	3.29	-2.31	-4.97	8.46e-09	3.11e-07	0.00225		PREDICTED: UDP-N-acetylglucosamine transporter-like isoform X3 [Salmo salar]
contig_0015793	contig_0015793	1..2276	1.51	-0.88	-1.85	0.02	0.11	1	1.51	-2.25	-4.77	1.31e-05	0.000211	1		PREDICTED: adenosylhomocysteinase 2-like isoform X1 [Salmo salar]
contig_0022154	contig_0022154	1..1622	2.9	-0.88	-1.85	0.00365	0.04	1	2.9	-2.23	-4.68	6.72e-07	1.57e-05	0.18		PREDICTED: uncharacterized protein LOC106604339 [Salmo salar]
contig_0035421	contig_0035421	1..622	2.47	-0.89	-1.85	0.09	0.29	1	2.47	-2.39	-5.25	0.00215	0.01	1		PREDICTED: LOW QUALITY PROTEIN: histone-lysine N-methyltransferase 2B-like [Salmo salar]
contig_0035667	contig_0035667	1..1774	0.87	-0.89	-1.85	0.09	0.29	1	0.87	-3.35	-10.21	0.0013	0.00984	1		PREDICTED: uncharacterized protein LOC106592710 isoform X3 [Salmo salar]
contig_0043804	contig_0043804	1..464	3.31	-0.89	-1.85	0.09	0.29	1	3.31	-2.08	-4.22	0.00357	0.02	1		PREDICTED: ankyrin repeat domain-containing protein 11-like isoform X2 [Salmo salar]
contig_0045305	contig_0045305	1..758	4.05	-0.89	-1.85	0.02	0.13	1	4.05	-2.09	-4.26	6.02e-05	0.000779	1		not available
contig_0045546	contig_0045546	1..972	2.51	-0.89	-1.85	0.04	0.18	1	2.51	-2.26	-4.8	0.000188	0.00202	1		PREDICTED: brefeldin A-inhibited guanine nucleotide-exchange protein 2-like [Salmo salar]
contig_0106601	contig_0106601	1..256	11.99	-0.89	-1.85	0.02	0.13	1	11.99	-2.41	-5.31	2.21e-05	0.00033	1		PREDICTED: repetitive proline-rich cell wall protein-like [Salmo salar]
contig_0140840	contig_0140840	1..2313	0.66	-0.89	-1.85	0.09	0.29	1	0.66	-2.39	-5.25	0.00215	0.01	1		PREDICTED: ankyrin-1-like isoform X16 [Salmo salar]
contig_0015506	contig_0015506	1..3509	7.98	-0.9	-1.86	3.41e-08	2.34e-06	0.00928	7.98	-2.27	-4.83	3.34e-28	1.6e-25	8.88e-23		PREDICTED: uncharacterized protein LOC106578026 [Salmo salar]
contig_0025027	contig_0025027	1..724	4.97	-0.9	-1.86	0.01	0.1	1	4.97	-3.62	-12.27	1.54e-06	3.27e-05	0.41		not available
contig_0032202	contig_0032202	1..217	16.59	-0.9	-1.86	0.01	0.1	1	16.59	-2.83	-7.1	1.95e-06	4.04e-05	0.52		PREDICTED: tubulin monoglycylase TTLL3-like [Salmo salar]
contig_0041080	contig_0041080	1..2619	0.69	-0.89	-1.86	0.07	0.25	1	0.69	-2.62	-6.15	0.000695	0.00592	1		PREDICTED: uncharacterized protein LOC106613431, partial [Salmo salar]
contig_0095805	contig_0095805	1..472	7.63	-0.9	-1.86	0.01	0.1	1	7.63	-2.06	-4.17	1.93e-05	0.000294	1		not available
contig_0097443	contig_0097443	1..410	10.97	-0.9	-1.86	0.00391	0.04	1	10.97	-2.16	-4.47	1.52e-06	3.24e-05	0.41		PREDICTED: uncharacterized protein DDB_G0290685-like [Salmo salar]
contig_0117055	contig_0117055	1..2139	1.56	-0.89	-1.86	0.02	0.11	1	1.56	-2.21	-4.62	2.02e-05	0.000305	1		PREDICTED: calphotin-like isoform X2 [Salmo salar]
contig_0010640	contig_0010640	1..648	25.82	-0.9	-1.87	1.82e-06	8.34e-05	0.49	25.82	-2.44	-5.43	7.09e-21	1.68e-18	1.89e-15		not available
contig_0019781	contig_0019781	1..2324	2.39	-0.91	-1.87	0.00147	0.02	1	2.39	-2.03	-4.08	7.26e-08	2.14e-06	0.02		PREDICTED: homeodomain-interacting protein kinase 2-like isoform X7 [Salmo salar]
contig_0025553	contig_0025553	1..2608	0.1	-0.9	-1.87	0.45	NaN	1	0.75	3.03	8.18	1.88e-05	0.000287	1		PREDICTED: hydroperoxide isomerase ALOXE3-like [Salmo salar]
contig_0028890	contig_0028890	1..328	3.55	-0.9	-1.87	0.13	0.36	1	3.55	-3.88	-14.72	0.00598	0.03	1		PREDICTED: calponin homology domain-containing protein 2 [Salmo salar]
contig_0059249	contig_0059249	1..1373	0.85	-0.9	-1.87	0.13	0.36	1	0.85	-2.4	-5.27	0.00709	0.04	1		PREDICTED: glutamate decarboxylase 1-like isoform X3 [Salmo salar]
contig_0063138	contig_0063138	1..2291	2.7	-0.9	-1.87	0.0009	0.01	1	2.7	-2.97	-7.81	2.16e-10	1.1e-08	5.74e-05		aryl hydrocarbon receptor 1 beta-like protein [Salmo salar]
contig_0066772	contig_0066772	1..1238	0.94	-0.9	-1.87	0.13	0.36	1	0.94	-2.4	-5.27	0.00709	0.04	1		PREDICTED: apoptosis-inducing factor 3-like isoform X1 [Salmo salar]
contig_0105576	contig_0105576	1..740	1.57	-0.9	-1.87	0.13	0.36	1	1.57	-3.88	-14.72	0.00598	0.03	1		olfactory receptor family C subfamily 4 member 9 [Salmo salar]
contig_0115217	contig_0115217	1..525	2.22	-0.9	-1.87	0.13	0.36	1	2.22	-3.88	-14.72	0.00598	0.03	1		Lipoma HMGIC fusion partner-like 4 protein [Salmo salar]
contig_0120845	contig_0120845	1..472	0.56	-0.9	-1.87	0.45	NaN	1	5.21	3.36	10.28	1.51e-06	3.21e-05	0.4		not available
contig_0122784	contig_0122784	1..1335	0.2	-0.9	-1.87	0.45	NaN	1	0.9	2.33	5.02	0.00159	0.01	1		C14orf130 [Salmo salar]
contig_0164269	contig_0164269	1..1515	0.77	-0.9	-1.87	0.13	0.36	1	0.77	-3.88	-14.72	0.00598	0.03	1		FGF2 [Salmo salar]
contig_0168149	contig_0168149	1..626	3.72	-0.9	-1.87	0.04	0.18	1	3.72	-2.01	-4.03	0.000498	0.00451	1		PREDICTED: disks large homolog 5-like isoform X3 [Salmo salar]
contig_0169788	contig_0169788	1..1161	1	-0.9	-1.87	0.13	0.36	1	1	-2.4	-5.27	0.00709	0.04	1		PREDICTED: double-stranded RNA-specific adenosine deaminase [Salmo salar]
contig_0176370	contig_0176370	1..2327	0.5	-0.9	-1.87	0.13	0.36	1	0.5	-2.4	-5.27	0.00709	0.04	1		PREDICTED: cyclin-dependent kinase-like 3 [Salmo salar]
contig_0004758	contig_0004758	1..509	5.62	-0.91	-1.88	0.02	0.13	1	5.62	-2.14	-4.4	8.69e-05	0.00106	1		PREDICTED: thyrotropin-releasing hormone receptor-like [Salmo salar]
contig_0030579	contig_0030579	1..660	2.57	-0.91	-1.88	0.07	0.25	1	2.57	-2.93	-7.65	0.000781	0.00649	1		PREDICTED: transcriptional repressor p66-beta-like isoform X6 [Salmo salar]
contig_0046682	contig_0046682	1..2087	0.68	-0.91	-1.88	0.09	0.3	1	0.68	-3.25	-9.51	0.00187	0.01	1		FGF2 [Salmo salar]
contig_0047916	contig_0047916	1..1283	1.11	-0.91	-1.88	0.09	0.3	1	1.11	-2.69	-6.46	0.00224	0.02	1		Transposable element Tcb1 transposase [Salmo salar]
contig_0051004	contig_0051004	1..2191	0.65	-0.91	-1.88	0.09	0.3	1	0.65	-2.29	-4.89	0.00345	0.02	1		PREDICTED: dystrophin-related protein 2-like [Salmo salar]
contig_0052245	contig_0052245	1..2510	1.96	-0.91	-1.88	0.00245	0.03	1	1.96	-2.1	-4.28	8.36e-07	1.91e-05	0.22		PREDICTED: uncharacterized protein LOC106611174 [Salmo salar]
contig_0057312	contig_0057312	1..1096	1.55	-0.91	-1.88	0.07	0.25	1	1.55	-3.49	-11.26	0.000772	0.00643	1		PREDICTED: UDP-N-acetylglucosamine transporter-like isoform X3 [Salmo salar]
contig_0065879	contig_0065879	1..2452	1.06	-0.91	-1.88	0.03	0.16	1	1.06	-2.17	-4.49	0.000159	0.00176	1		PREDICTED: uncharacterized protein LOC106610065 [Salmo salar]
contig_0076464	contig_0076464	1..1457	1.16	-0.91	-1.88	0.07	0.25	1	1.16	-2.93	-7.65	0.000781	0.00649	1		PREDICTED: migration and invasion-inhibitory protein [Salmo salar]
contig_0093971	contig_0093971	1..1554	1.09	-0.91	-1.88	0.07	0.25	1	1.09	-4.42	-21.37	0.00162	0.01	1		UPF0527 membrane protein [Salmo salar]
contig_0095720	contig_0095720	1..1079	1.32	-0.91	-1.88	0.09	0.3	1	1.32	-2.29	-4.89	0.00345	0.02	1		collagen Type XI Alpha2 [Salmo salar]
contig_0121820	contig_0121820	1..1856	0.77	-0.91	-1.88	0.09	0.3	1	0.77	-2.69	-6.46	0.00224	0.02	1		not available
contig_0124038	contig_0124038	1..442	3.83	-0.91	-1.88	0.07	0.25	1	3.83	-2.22	-4.66	0.00173	0.01	1		PREDICTED: lysine-specific demethylase 4B isoform X1 [Salmo salar]
contig_0141076	contig_0141076	1..513	2.79	-0.91	-1.88	0.09	0.3	1	2.79	-4.17	-18.05	0.00298	0.02	1		PREDICTED: integrin alpha-1-like isoform X2 [Salmo salar]
contig_0146457	contig_0146457	1..2028	0.7	-0.91	-1.88	0.09	0.3	1	0.7	-3.25	-9.51	0.00187	0.01	1		PREDICTED: uncharacterized protein LOC106605504 [Salmo salar]
contig_0167217	contig_0167217	1..802	1.78	-0.91	-1.88	0.09	0.3	1	1.78	-2.29	-4.89	0.00345	0.02	1		PREDICTED: muscarinic acetylcholine receptor M4-like [Salmo salar]
contig_0015558	contig_0015558	1..2665	1.81	-0.92	-1.89	0.00252	0.03	1	1.81	-2.26	-4.78	4.49e-07	1.1e-05	0.12		PREDICTED: ataxin-1-like [Salmo salar]
contig_0045643	contig_0045643	1..1008	5.04	-0.92	-1.89	0.00198	0.03	1	5.04	-2.06	-4.16	7.66e-07	1.77e-05	0.2		not available
contig_0065760	contig_0065760	1..2206	1.54	-0.92	-1.89	0.02	0.1	1	1.54	-2.23	-4.7	1.63e-05	0.000253	1		not available
contig_0004394	contig_0004394	1..642	7.75	-0.92	-1.9	0.00203	0.03	1	7.75	-2.11	-4.33	6.83e-07	1.59e-05	0.18		PREDICTED: up-regulator of cell proliferation-like, partial [Salmo salar]
contig_0051186	contig_0051186	1..946	4.03	-0.93	-1.9	0.01	0.08	1	4.03	-2.14	-4.41	8.21e-06	0.000141	1		PREDICTED: collagen alpha-1(XI) chain-like isoform X1 [Salmo salar]
contig_0057492	contig_0057492	1..1311	2.1	-0.92	-1.9	0.02	0.14	1	2.1	-2.44	-5.43	5.02e-05	0.000665	1		collagen Type XI Alpha2 [Salmo salar]
contig_0071980	contig_0071980	1..2038	3.66	-0.92	-1.9	0.000262	0.00546	1	3.66	-3.52	-11.47	3.51e-12	2.5e-10	9.34e-07		collagen Type XI Alpha2 [Salmo salar]
contig_0010122	contig_0010122	1..1520	1.57	-0.94	-1.91	0.03	0.16	1	1.57	-3.42	-10.74	7.2e-05	0.000901	1		PREDICTED: collagen alpha-1(VI) chain-like [Salmo salar]
contig_0019360	contig_0019360	1..2003	0.53	-0.93	-1.91	0.14	0.37	1	0.53	-2.82	-7.06	0.00767	0.04	1		not available
contig_0025493	contig_0025493	1..1541	0.69	-0.93	-1.91	0.14	0.37	1	0.69	-3.74	-13.39	0.00815	0.04	1		PREDICTED: UPF0606 protein KIAA1549-like [Salmo salar]
contig_0030855	contig_0030855	1..488	2.17	-0.93	-1.91	0.14	0.37	1	2.17	-2.82	-7.06	0.00767	0.04	1		myosin 1, partial [Salmo salar]
contig_0038240	contig_0038240	1..2020	0.52	-0.93	-1.91	0.14	0.37	1	0.52	-2.82	-7.06	0.00767	0.04	1		PREDICTED: taste receptor type 2 member 8 [Salmo salar]
contig_0052175	contig_0052175	1..509	3.64	-0.94	-1.91	0.05	0.22	1	3.64	-2.35	-5.09	0.000859	0.00704	1		PREDICTED: AT-rich interactive domain-containing protein 4B-like, partial [Salmo salar]
contig_0055336	contig_0055336	1..465	2.28	-0.93	-1.91	0.14	0.37	1	2.28	-2.82	-7.06	0.00767	0.04	1		Transposable element Tc1 transposase [Salmo salar]
contig_0062164	contig_0062164	1..816	2.27	-0.94	-1.91	0.05	0.22	1	2.27	-2.66	-6.33	0.00056	0.00496	1		Transposable element Tc1 transposase [Salmo salar]
contig_0088280	contig_0088280	1..634	2.09	-0.93	-1.91	0.1	0.31	1	2.09	-2.18	-4.53	0.00561	0.03	1		not available
contig_0103308	contig_0103308	1..1316	1.21	-0.93	-1.91	0.07	0.26	1	1.21	-2.13	-4.37	0.0028	0.02	1		PREDICTED: collagen alpha-2(VI) chain-like isoform X1 [Salmo salar]
contig_0110311	contig_0110311	1..1263	0.84	-0.93	-1.91	0.14	0.37	1	0.84	-2.82	-7.06	0.00767	0.04	1		PREDICTED: plexin-B1-like isoform X2 [Salmo salar]
contig_0124201	contig_0124201	1..2184	0.97	-0.94	-1.91	0.04	0.19	1	0.97	-2.54	-5.81	0.00028	0.00282	1		PREDICTED: uncharacterized protein LOC106599233 [Salmo salar]
contig_0130289	contig_0130289	1..1190	1.33	-0.93	-1.91	0.07	0.26	1	1.33	-2.44	-5.43	0.0017	0.01	1		PREDICTED: CCR4-NOT transcription complex subunit 4-like, partial [Salmo salar]
contig_0147183	contig_0147183	1..3285	0.73	-0.94	-1.91	0.03	0.16	1	0.73	-3.02	-8.13	7.41e-05	0.000923	1		not available
contig_0191172	contig_0191172	1..404	3.28	-0.93	-1.91	0.1	0.31	1	3.28	-2.58	-5.98	0.00351	0.02	1		PREDICTED: transcriptional coactivator YAP1-like [Salmo salar]
contig_0195542	contig_0195542	1..257	5.15	-0.93	-1.91	0.1	0.31	1	5.15	-4.06	-16.72	0.00389	0.02	1		PREDICTED: protein bicaudal D homolog 2-like [Salmo salar]
contig_0079474	contig_0079474	1..902	3.52	-0.94	-1.92	0.02	0.1	1	3.52	-2	-4.01	6.55e-05	0.000834	1		PREDICTED: R-spondin-3-like [Salmo salar]
contig_0079961	contig_0079961	1..1149	4.61	-0.94	-1.92	0.00133	0.02	1	4.61	-2.2	-4.6	2.05e-07	5.46e-06	0.05		not available
contig_0085930	contig_0085930	1..1160	3.19	-0.94	-1.92	0.01	0.08	1	3.19	-2.23	-4.68	7.51e-06	0.000131	1		PREDICTED: FERM, RhoGEF and pleckstrin domain-containing protein 1-like, partial [Salmo salar]
contig_0108932	contig_0108932	1..550	4.81	-0.94	-1.92	0.02	0.14	1	4.81	-2.38	-5.22	7.74e-05	0.000958	1		PREDICTED: collagen alpha-1(XIII) chain-like isoform X17 [Salmo salar]
contig_0066357	contig_0066357	1..1411	1.99	-0.95	-1.93	0.02	0.12	1	1.99	-2.47	-5.53	4.05e-05	0.000554	1		PREDICTED: transmembrane protein 158-like [Salmo salar]
contig_0071737	contig_0071737	1..2142	4.67	-0.95	-1.93	2.84e-05	0.000885	1	4.67	-2.37	-5.17	8.36e-14	7.57e-12	2.23e-08		PREDICTED: uncharacterized protein LOC106609103 isoform X4 [Salmo salar]
contig_0072202	contig_0072202	1..1794	2.74	-0.95	-1.93	0.00174	0.02	1	2.74	-3.5	-11.29	2.41e-08	7.98e-07	0.00641		PREDICTED: uncharacterized protein LOC106585798 [Salmo salar]
contig_0128630	contig_0128630	1..2694	1.04	-0.95	-1.93	0.02	0.12	1	1.04	-2.11	-4.32	0.000109	0.00128	1		reverse transcriptase-like protein [Salmo salar]
contig_0000968	contig_0000968	1..377	4.63	-0.96	-1.94	0.06	0.23	1	4.63	-2.26	-4.8	0.00137	0.01	1		transposase [Salmo salar]
contig_0002351	contig_0002351	1..1345	38.14	-0.96	-1.94	2.39e-11	2.79e-09	6.5e-06	38.14	-2.54	-5.83	8.2e-46	9.49e-43	2.18e-40		PREDICTED: interferon-induced very large GTPase 1-like [Salmo salar]
contig_0019273	contig_0019273	1..1157	1.51	-0.96	-1.94	0.06	0.23	1	1.51	-2.98	-7.88	0.000639	0.00552	1		PREDICTED: DNA-directed RNA polymerase II subunit RPB1 [Salmo salar]
contig_0025552	contig_0025552	1..287	50.36	-0.96	-1.94	1.66e-06	7.72e-05	0.45	50.36	-2.37	-5.17	2.64e-18	4.55e-16	7.02e-13		PREDICTED: hydroperoxide isomerase ALOXE3-like [Salmo salar]
contig_0046641	contig_0046641	1..952	2.67	-0.95	-1.94	0.03	0.14	1	2.67	-3.52	-11.45	4.41e-05	0.000595	1		PREDICTED: collagen alpha-1(VI) chain-like [Salmo salar]
contig_0048931	contig_0048931	1..1384	1.26	-0.96	-1.94	0.06	0.23	1	1.26	-2.98	-7.88	0.000639	0.00552	1		PREDICTED: putative proline-rich protein 21, partial [Salmo salar]
contig_0064406	contig_0064406	1..1901	0.92	-0.96	-1.94	0.06	0.23	1	0.92	-2.01	-4.02	0.00231	0.02	1		PREDICTED: zinc finger protein 2 homolog [Salmo salar]
contig_0025355	contig_0025355	1..1113	1.09	-0.96	-1.95	0.1	0.32	1	1.09	-2.46	-5.5	0.00558	0.03	1		not available
contig_0029045	contig_0029045	1..731	1.67	-0.96	-1.95	0.1	0.32	1	1.67	-2.06	-4.17	0.00925	0.05	1		PREDICTED: solute carrier family 22 member 13-like isoform X4 [Salmo salar]
contig_0048139	contig_0048139	1..626	2.37	-0.96	-1.95	0.08	0.27	1	2.37	-2.03	-4.08	0.00456	0.03	1		PREDICTED: unconventional myosin-XVIIIa-like isoform X3 [Salmo salar]
contig_0082522	contig_0082522	1..919	1.61	-0.96	-1.95	0.08	0.27	1	1.61	-2.34	-5.07	0.00272	0.02	1		PREDICTED: activating molecule in BECN1-regulated autophagy protein 1-like isoform X4 [Salmo salar]
contig_0094470	contig_0094470	1..502	2.43	-0.96	-1.95	0.1	0.32	1	2.43	-3.94	-15.39	0.00516	0.03	1		PREDICTED: anthrax toxin receptor 2-like [Salmo salar]
contig_0104343	contig_0104343	1..2308	0.64	-0.96	-1.95	0.08	0.27	1	0.64	-2.03	-4.08	0.00456	0.03	1		PREDICTED: transmembrane protein 211-like [Salmo salar]
contig_0137820	contig_0137820	1..846	1.75	-0.96	-1.95	0.08	0.27	1	1.75	-3.3	-9.86	0.00155	0.01	1		PREDICTED: integrin alpha-5-like [Salmo salar]
contig_0013734	contig_0013734	1..215	11.33	-0.97	-1.96	0.03	0.14	1	11.33	-2.07	-4.21	0.000314	0.00311	1		PREDICTED: uncharacterized protein LOC106587367 isoform X2 [Salmo salar]
contig_0046554	contig_0046554	1..1729	3.37	-0.97	-1.96	0.000592	0.01	1	3.37	-2.17	-4.5	1.45e-08	5.05e-07	0.00386		collagen Type XI Alpha2 [Salmo salar]
contig_0110529	contig_0110529	1..2225	0.98	-0.97	-1.96	0.03	0.17	1	0.98	-2.1	-4.28	0.000589	0.00518	1		PREDICTED: discoidin domain-containing receptor 2-like isoform X1 [Salmo salar]
contig_0138803	contig_0138803	1..1500	2.44	-0.97	-1.96	0.0087	0.07	1	2.44	-2.2	-4.61	9.29e-06	0.000157	1		PREDICTED: stromelysin-3-like [Salmo salar]
contig_0163135	contig_0163135	1..2328	1.57	-0.97	-1.96	0.0087	0.07	1	1.57	-2.34	-5.06	5.63e-06	0.000102	1		PREDICTED: ankyrin repeat domain-containing protein 26-like isoform X15 [Salmo salar]
contig_0005145	contig_0005145	1..8923	9.98	-0.98	-1.97	1.36e-13	2.16e-11	3.7e-08	9.98	-2.03	-4.07	2.43e-44	2.68e-41	6.48e-39		PREDICTED: LOW QUALITY PROTEIN: trichohyalin-like [Salmo salar]
contig_0060332	contig_0060332	1..1699	2.24	-0.98	-1.97	0.0072	0.06	1	2.24	-2.03	-4.08	1.38e-05	0.000221	1		PREDICTED: zinc finger and BTB domain-containing protein 47-like, partial [Salmo salar]
contig_0070635	contig_0070635	1..1459	2.14	-0.98	-1.97	0.01	0.09	1	2.14	-3.1	-8.57	6.48e-06	0.000115	1		PREDICTED: trinucleotide repeat-containing gene 6C protein-like isoform X4 [Salmo salar]
contig_0015929	contig_0015929	1..1648	1	-0.98	-1.98	0.06	0.23	1	1	-2.49	-5.61	0.00136	0.01	1		PREDICTED: collagen alpha-1(VII) chain-like isoform X3 [Salmo salar]
contig_0033414	contig_0033414	1..315	5.21	-0.98	-1.98	0.06	0.23	1	5.21	-2.17	-4.51	0.0022	0.01	1		not available
contig_0043022	contig_0043022	1..460	7.14	-0.99	-1.98	0.01	0.08	1	7.14	-2.5	-5.67	9.53e-06	0.000161	1		PREDICTED: mucin-19-like isoform X1 [Salmo salar]
contig_0049856	contig_0049856	1..477	3.44	-0.98	-1.98	0.06	0.23	1	3.44	-2.89	-7.41	0.000957	0.00769	1		not available
contig_0054644	contig_0054644	1..6791	1.08	-0.98	-1.98	0.000139	0.00327	1	1.08	-2.16	-4.46	3.41e-10	1.68e-08	9.08e-05		PREDICTED: formin-binding protein 1-like isoform X12 [Salmo salar]
contig_0055913	contig_0055913	1..1361	1.71	-0.99	-1.98	0.03	0.15	1	1.71	-2.99	-7.95	8.97e-05	0.00109	1		Transposable element Tcb1 transposase [Salmo salar]
contig_0066402	contig_0066402	1..1885	0.87	-0.98	-1.98	0.06	0.23	1	0.87	-3.45	-10.91	0.000914	0.00741	1		PREDICTED: uncharacterized protein LOC106577580 isoform X3 [Salmo salar]
contig_0066724	contig_0066724	1..372	13.23	-0.99	-1.98	0.00122	0.02	1	13.23	-2.77	-6.82	4.93e-08	1.52e-06	0.01		PREDICTED: sodium/potassium-transporting ATPase subunit alpha-1-like [Salmo salar]
contig_0068474	contig_0068474	1..549	5.98	-0.99	-1.98	0.01	0.08	1	5.98	-2.05	-4.14	4.21e-05	0.000572	1		PREDICTED: UDP-N-acetylglucosamine transporter-like isoform X2 [Salmo salar]
contig_0069961	contig_0069961	1..1783	2.52	-0.98	-1.98	0.00193	0.03	1	2.52	-2.06	-4.17	2.56e-06	5.07e-05	0.68		PREDICTED: chromodomain-helicase-DNA-binding protein 6-like isoform X7 [Salmo salar]
contig_0099543	contig_0099543	1..452	3.63	-0.98	-1.98	0.06	0.23	1	3.63	-2.49	-5.61	0.00136	0.01	1		not available
contig_0130732	contig_0130732	1..2784	1.96	-0.98	-1.98	0.00076	0.01	1	1.96	-2.34	-5.06	1.56e-08	5.38e-07	0.00414		PREDICTED: cell surface glycoprotein 1-like [Salmo salar]
contig_0131069	contig_0131069	1..682	2.41	-0.98	-1.98	0.06	0.23	1	2.41	-2.17	-4.51	0.0022	0.01	1		PREDICTED: uncharacterized protein KIAA0895-like [Salmo salar]
contig_0147143	contig_0147143	1..583	2.81	-0.98	-1.98	0.06	0.23	1	2.81	-3.45	-10.91	0.000914	0.00741	1		PREDICTED: zinc finger protein 236-like [Salmo salar]
contig_0006697	contig_0006697	1..2310	3.39	-0.99	-1.99	7.91e-05	0.00207	1	3.39	-2.96	-7.78	1.41e-12	1.08e-10	3.75e-07		PREDICTED: uncharacterized protein LOC106570113 isoform X1 [Salmo salar]
contig_0018658	contig_0018658	1..1358	1.01	-0.99	-1.99	0.08	0.27	1	1.01	-2.23	-4.71	0.00439	0.03	1		PREDICTED: uncharacterized protein LOC106600457 [Salmo salar]
contig_0042236	contig_0042236	1..3499	2.98	-0.99	-1.99	1.09e-05	0.00039	1	2.98	-2.28	-4.85	7.28e-14	6.67e-12	1.94e-08		PREDICTED: thyroid hormone receptor alpha isoform X1 [Salmo salar]
contig_0102538	contig_0102538	1..2385	0.87	-0.99	-1.99	0.03	0.17	1	0.87	-2.25	-4.74	0.000559	0.00496	1		PREDICTED: uncharacterized protein LOC106597293 [Salmo salar]
contig_0102788	contig_0102788	1..2929	0.7	-0.99	-1.99	0.03	0.17	1	0.7	-2.25	-4.74	0.000559	0.00496	1		PREDICTED: mitogen-activated protein kinase kinase kinase kinase 4-like isoform X6 [Salmo salar]
contig_0103785	contig_0103785	1..722	1.91	-0.99	-1.99	0.08	0.27	1	1.91	-2.23	-4.71	0.00439	0.03	1		not available
contig_0111953	contig_0111953	1..295	4.67	-0.99	-1.99	0.08	0.27	1	4.67	-2.23	-4.71	0.00439	0.03	1		PREDICTED: LOW QUALITY PROTEIN: pentatricopeptide repeat domain-containing protein 3, mitochondrial [Salmo salar]
contig_0113992	contig_0113992	1..646	2.13	-0.99	-1.99	0.08	0.27	1	2.13	-2.23	-4.71	0.00439	0.03	1		myosin 1, partial [Salmo salar]
contig_0179009	contig_0179009	1..632	2.18	-0.99	-1.99	0.08	0.27	1	2.18	-2.23	-4.71	0.00439	0.03	1		PREDICTED: 1-phosphatidylinositol 4,5-bisphosphate phosphodiesterase beta-4 isoform X2 [Salmo salar]
contig_0194028	contig_0194028	1..782	1.76	-0.99	-1.99	0.08	0.27	1	1.76	-2.23	-4.71	0.00439	0.03	1		not available
contig_0006970	contig_0006970	1..7643	34.77	-1	-2	1.23e-16	2.69e-14	3.34e-11	34.77	-2.02	-4.04	2.98e-58	4.76e-55	7.93e-53		PREDICTED: collagen alpha-5(IV) chain-like isoform X1 [Salmo salar]
contig_0008200	contig_0008200	1..1489	7.22	-1	-2	7.84e-06	0.000294	1	7.22	-2.42	-5.35	8.49e-15	9.17e-13	2.26e-09		PREDICTED: plectin-like [Salmo salar]
contig_0021614	contig_0021614	1..750	12.35	-1	-2	2.2e-05	0.000716	1	12.35	-2.62	-6.15	8.99e-14	8.11e-12	2.39e-08		PREDICTED: plectin-like isoform X5 [Salmo salar]
contig_0029356	contig_0029356	1..1245	0.89	-1	-2	0.11	0.33	1	0.89	-2.33	-5.03	0.00904	0.04	1		PREDICTED: inositol 1,4,5-trisphosphate receptor type 1-like isoform X4 [Salmo salar]
contig_0040340	contig_0040340	1..229	7.86	-1	-2	0.05	0.2	1	7.86	-2.31	-4.95	0.00108	0.00849	1		PREDICTED: probable E3 ubiquitin-protein ligase HERC3 [Salmo salar]
contig_0050373	contig_0050373	1..782	1.42	-1	-2	0.11	0.33	1	1.42	-2.33	-5.03	0.00904	0.04	1		collagen Type XI Alpha2 [Salmo salar]
contig_0051493	contig_0051493	1..550	2.02	-1	-2	0.11	0.33	1	2.02	-2.89	-7.41	0.00617	0.03	1		Transposable element Tcb2 transposase [Salmo salar]
contig_0051856	contig_0051856	1..2317	5.89	-1	-2	1.07e-06	5.21e-05	0.29	5.89	-2.15	-4.44	3.31e-16	4.37e-14	8.81e-11		PREDICTED: protein patched homolog 1 isoform X1 [Salmo salar]
contig_0054202	contig_0054202	1..4078	0.27	-1	-2	0.11	0.33	1	0.27	-2.33	-5.03	0.00904	0.04	1		PREDICTED: clathrin heavy chain 1-like isoform X1 [Salmo salar]
contig_0069927	contig_0069927	1..688	1.62	-1	-2	0.11	0.33	1	1.62	-2.33	-5.03	0.00904	0.04	1		transposase [Salmo salar]
contig_0071828	contig_0071828	1..225	4.94	-1	-2	0.11	0.33	1	4.94	-2.33	-5.03	0.00904	0.04	1		PREDICTED: protocadherin-8-like [Salmo salar]
contig_0094087	contig_0094087	1..1129	1.59	-1	-2	0.05	0.2	1	1.59	-2.31	-4.95	0.00108	0.00849	1		PREDICTED: neurofibromin-like isoform X1 [Salmo salar]
contig_0100643	contig_0100643	1..1262	0.88	-1	-2	0.11	0.33	1	0.88	-2.33	-5.03	0.00904	0.04	1		PREDICTED: V-set domain-containing T-cell activation inhibitor 1 [Salmo salar]
contig_0124020	contig_0124020	1..1498	0.74	-1	-2	0.11	0.33	1	0.74	-2.33	-5.03	0.00904	0.04	1		PREDICTED: transcriptional regulator ATRX-like, partial [Salmo salar]
contig_0142733	contig_0142733	1..798	3.12	-1	-2	0.02	0.13	1	3.12	-2.3	-4.91	0.00015	0.00168	1		not available
contig_0005280	contig_0005280	1..2535	60.02	-1.01	-2.01	8.95e-16	1.77e-13	2.43e-10	60.02	-2.52	-5.74	2.07e-73	5.19e-70	5.5e-68		PREDICTED: uncharacterized protein LOC106576475 [Salmo salar]
contig_0011819	contig_0011819	1..2097	9.04	-1	-2.01	5.07e-08	3.38e-06	0.01	9.04	-7.9	-238.17	9.04e-09	3.31e-07	0.00241		interleukin-17A/F3 [Salmo salar]
contig_0048968	contig_0048968	1..621	9.8	-1	-2.01	0.000334	0.0066	1	9.8	-2.82	-7.04	4.07e-10	1.98e-08	0.000108		transposase [Salmo salar]
contig_0067138	contig_0067138	1..385	3.99	-1.01	-2.01	0.06	0.24	1	3.99	-2.08	-4.22	0.00357	0.02	1		not available
contig_0101555	contig_0101555	1..527	4.22	-1.01	-2.01	0.03	0.15	1	4.22	-2.35	-5.11	0.000283	0.00284	1		PREDICTED: uncharacterized protein LOC106586647 isoform X2 [Salmo salar]
contig_0131626	contig_0131626	1..253	8.79	-1.01	-2.01	0.03	0.15	1	8.79	-2.13	-4.39	0.000467	0.0043	1		PREDICTED: steroid hormone receptor ERR2-like isoform X3 [Salmo salar]
contig_0157014	contig_0157014	1..994	1.54	-1.01	-2.01	0.06	0.24	1	1.54	-2.39	-5.25	0.00215	0.01	1		PREDICTED: uncharacterized protein LOC106592766 isoform X1 [Salmo salar]
contig_0008066	contig_0008066	1..1673	1.17	-1.02	-2.02	0.04	0.17	1	1.17	-2.17	-4.5	0.00089	0.00724	1		PREDICTED: zinc finger BED domain-containing protein 5-like [Salmo salar]
contig_0079584	contig_0079584	1..200	18.79	-1.01	-2.02	0.00608	0.06	1	18.79	-2.25	-4.74	6.08e-06	0.000109	1		PREDICTED: nuclear factor 7, brain-like [Salmo salar]
contig_0049454	contig_0049454	1..323	16.06	-1.02	-2.03	0.000667	0.01	1	16.06	-6.03	-65.26	1.35e-05	0.000217	1		PREDICTED: SNARE-associated protein Snapin-like isoform X2 [Salmo salar]
contig_0057571	contig_0057571	1..5838	0.48	-1.02	-2.03	0.01	0.1	1	0.48	-5.14	-35.34	0.00022	0.00231	1		PREDICTED: V(D)J recombination-activating protein 1 isoform X1 [Salmo salar]
contig_0089273	contig_0089273	1..562	4.99	-1.02	-2.03	0.01	0.1	1	4.99	-2.11	-4.32	0.000109	0.00128	1		PREDICTED: mitogen-activated protein kinase kinase kinase kinase 4-like isoform X5 [Salmo salar]
contig_0172518	contig_0172518	1..1888	0.45	-1.02	-2.03	0.15	0.39	1	2.34	2.55	5.86	4.17e-09	1.64e-07	0.00111		PREDICTED: leucine-rich repeat extensin-like protein 5 [Salmo salar]
contig_0010739	contig_0010739	1..2071	2.17	-1.03	-2.04	0.00295	0.03	1	2.17	-2.06	-4.17	2.56e-06	5.07e-05	0.68		Transposable element Tc1 transposase [Salmo salar]
contig_0013779	contig_0013779	1..1709	1.49	-1.03	-2.04	0.02	0.11	1	1.49	-2.14	-4.4	0.000199	0.00212	1		not available
contig_0028167	contig_0028167	1..7305	3.74	-1.03	-2.04	6.24e-10	5.83e-08	0.00017	3.74	-2.2	-4.6	7.08e-27	3.02e-24	1.88e-21		Transposable element Tcb1 transposase [Salmo salar]
contig_0030212	contig_0030212	1..781	1.63	-1.03	-2.04	0.08	0.28	1	1.63	-3.08	-8.46	0.00332	0.02	1		PREDICTED: ephrin type-A receptor 3-like, partial [Salmo salar]
contig_0033536	contig_0033536	1..640	1.99	-1.03	-2.04	0.08	0.28	1	1.99	-2.12	-4.35	0.00719	0.04	1		PREDICTED: uncharacterized protein LOC106591102 [Salmo salar]
contig_0034792	contig_0034792	1..2892	1.32	-1.03	-2.04	0.00508	0.05	1	1.32	-2.14	-4.41	8.21e-06	0.000141	1		reverse transcriptase-like protein [Salmo salar]
contig_0046130	contig_0046130	1..1535	0.83	-1.03	-2.04	0.08	0.28	1	0.83	-2.12	-4.35	0.00719	0.04	1		PREDICTED: chromodomain-helicase-DNA-binding protein 3 isoform X3 [Salmo salar]
contig_0056451	contig_0056451	1..1124	1.13	-1.03	-2.04	0.08	0.28	1	1.13	-3.08	-8.46	0.00332	0.02	1		PREDICTED: intraflagellar transport protein 80 homolog isoform X1 [Salmo salar]
contig_0060487	contig_0060487	1..1846	0.92	-1.03	-2.04	0.05	0.2	1	0.92	-2.22	-4.66	0.00173	0.01	1		PREDICTED: vascular endothelial growth factor A-A-like isoform X3 [Salmo salar]
contig_0078171	contig_0078171	1..335	5.06	-1.03	-2.04	0.05	0.2	1	5.06	-2.53	-5.79	0.00108	0.00849	1		PREDICTED: uncharacterized protein LOC106564374 isoform X11 [Salmo salar]
contig_0091995	contig_0091995	1..2073	0.61	-1.03	-2.04	0.08	0.28	1	0.61	-4	-16.05	0.00447	0.03	1		PREDICTED: nucleolar protein 3-like [Salmo salar]
contig_0095668	contig_0095668	1..620	5.46	-1.03	-2.04	0.00749	0.06	1	5.46	-2.23	-4.7	1.63e-05	0.000253	1		Transposable element Tcb1 transposase [Salmo salar]
contig_0101842	contig_0101842	1..716	1.77	-1.03	-2.04	0.08	0.28	1	1.77	-2.12	-4.35	0.00719	0.04	1		PREDICTED: histone-lysine N-methyltransferase 2A-like isoform X1 [Salmo salar]
contig_0107490	contig_0107490	1..1436	2.06	-1.03	-2.04	0.01	0.08	1	2.06	-2.04	-4.11	9.39e-05	0.00113	1		PREDICTED: voltage-dependent N-type calcium channel subunit alpha-1B-like isoform X1 [Salmo salar]
contig_0115038	contig_0115038	1..2117	0.6	-1.03	-2.04	0.08	0.28	1	0.6	-2.12	-4.35	0.00719	0.04	1		PREDICTED: calcium/calmodulin-dependent protein kinase type II subunit gamma-like isoform X8 [Salmo salar]
contig_0118595	contig_0118595	1..1748	1.94	-1.03	-2.04	0.00749	0.06	1	1.94	-2.23	-4.7	1.63e-05	0.000253	1		PREDICTED: serine/threonine-protein phosphatase 2A 56 kDa regulatory subunit gamma isoform-like isoform X3 [Salmo salar]
contig_0130824	contig_0130824	1..588	2.16	-1.03	-2.04	0.08	0.28	1	2.16	-2.12	-4.35	0.00719	0.04	1		PREDICTED: DNA-binding protein RFX7-like isoform X2 [Salmo salar]
contig_0131522	contig_0131522	1..4518	0.28	-1.03	-2.04	0.08	0.28	1	0.28	-2.12	-4.35	0.00719	0.04	1		PREDICTED: uncharacterized protein LOC106576711 isoform X1 [Salmo salar]
contig_0164112	contig_0164112	1..347	3.66	-1.03	-2.04	0.08	0.28	1	3.66	-3.08	-8.46	0.00332	0.02	1		hypothetical protein [Salmo salar]
contig_0010770	contig_0010770	1..2576	1.21	-1.04	-2.05	0.00922	0.07	1	1.21	-2.12	-4.33	4.83e-05	0.000643	1		not available
contig_0043329	contig_0043329	1..1115	23.55	-1.03	-2.05	8.36e-10	7.65e-08	0.000227	23.55	-2.64	-6.22	1.09e-30	6.17e-28	2.91e-25		PREDICTED: interferon-induced very large GTPase 1-like [Salmo salar]
contig_0082425	contig_0082425	1..1182	5.37	-1.03	-2.05	0.000188	0.00419	1	5.37	-2.3	-4.91	1.67e-09	7.15e-08	0.000445		PREDICTED: serine/threonine-protein kinase 10-like isoform X2 [Salmo salar]
contig_0082539	contig_0082539	1..3005	3.1	-1.03	-2.05	1.33e-05	0.000464	1	3.1	-2.27	-4.81	1.14e-12	8.85e-11	3.04e-07		PREDICTED: uncharacterized protein LOC106603467 [Salmo salar]
contig_0000734	contig_0000734	1..795	3.4	-1.04	-2.06	0.01	0.1	1	3.4	-3.6	-12.17	2.75e-05	0.000398	1		not available
contig_0004195	contig_0004195	1..1538	0.93	-1.04	-2.06	0.06	0.24	1	0.93	-2.69	-6.46	0.00224	0.02	1		PREDICTED: retinitis pigmentosa 1-like 1 protein [Salmo salar]
contig_0011482	contig_0011482	1..692	2.07	-1.04	-2.06	0.06	0.24	1	2.07	-2.29	-4.89	0.00345	0.02	1		transposase [Salmo salar]
contig_0021994	contig_0021994	1..1624	1.14	-1.04	-2.06	0.04	0.18	1	1.14	-2.66	-6.33	0.00056	0.00496	1		not available
contig_0030401	contig_0030401	1..2165	1.71	-1.05	-2.06	0.0051	0.05	1	1.71	-2.68	-6.4	1.89e-06	3.93e-05	0.5		PREDICTED: gastrula zinc finger protein xLCGF3.1-like [Salmo salar]
contig_0033740	contig_0033740	1..1024	1.4	-1.04	-2.06	0.06	0.24	1	1.4	-2.29	-4.89	0.00345	0.02	1		not available
contig_0035915	contig_0035915	1..7831	1.74	-1.04	-2.06	5e-07	2.69e-05	0.14	1.74	-2.44	-5.43	7.6e-18	1.23e-15	2.02e-12		PREDICTED: serine/threonine-protein phosphatase 6 regulatory ankyrin repeat subunit C-like isoform X1 [Salmo salar]
contig_0049922	contig_0049922	1..1156	1.6	-1.04	-2.06	0.04	0.18	1	1.6	-2.66	-6.33	0.00056	0.00496	1		PREDICTED: RNA binding protein fox-1 homolog 2-like [Salmo salar]
contig_0067998	contig_0067998	1..1883	0.98	-1.04	-2.06	0.04	0.18	1	0.98	-3.62	-12.31	0.000473	0.00434	1		PREDICTED: uncharacterized protein LOC106605384, partial [Salmo salar]
contig_0106587	contig_0106587	1..813	2.28	-1.04	-2.06	0.04	0.18	1	2.28	-2.66	-6.33	0.00056	0.00496	1		PREDICTED: phosphoprotein associated with glycosphingolipid-enriched microdomains 1-like [Salmo salar]
contig_0133391	contig_0133391	1..936	4.41	-1.04	-2.06	0.00352	0.04	1	4.41	-2.67	-6.35	5.82e-07	1.39e-05	0.16		PREDICTED: serine/threonine-protein kinase WNK2-like isoform X10 [Salmo salar]
contig_0026491	contig_0026491	1..616	5.33	-1.05	-2.07	0.00755	0.06	1	5.33	-2.5	-5.67	9.53e-06	0.000161	1		collagen Type XI Alpha2 [Salmo salar]
contig_0042650	contig_0042650	1..1910	0.53	-1.05	-2.07	0.11	0.33	1	0.53	-2.75	-6.71	0.00958	0.05	1		UPF0527 membrane protein [Salmo salar]
contig_0050265	contig_0050265	1..1076	3.59	-1.05	-2.07	0.00423	0.04	1	3.59	-3.41	-10.6	5.97e-07	1.42e-05	0.16		PREDICTED: polypeptide N-acetylgalactosaminyltransferase 18-like isoform X1 [Salmo salar]
contig_0083280	contig_0083280	1..1814	1.58	-1.05	-2.07	0.01	0.08	1	1.58	-2.5	-5.64	3.28e-05	0.000462	1		PREDICTED: ras-related protein Rab-9B-like [Salmo salar]
contig_0094964	contig_0094964	1..303	3.32	-1.05	-2.07	0.11	0.33	1	3.32	-3.67	-12.73	0.00959	0.05	1		not available
contig_0133134	contig_0133134	1..906	1.11	-1.05	-2.07	0.11	0.33	1	1.11	-2.75	-6.71	0.00958	0.05	1		PREDICTED: proto-oncogene DBL-like isoform X1 [Salmo salar]
contig_0166556	contig_0166556	1..1258	0.8	-1.05	-2.07	0.11	0.33	1	0.8	-2.75	-6.71	0.00958	0.05	1		not available
contig_0012100	contig_0012100	1..1541	1.68	-1.06	-2.08	0.01	0.1	1	1.68	-2.83	-7.12	4.31e-05	0.000583	1		PREDICTED: protein asteroid homolog 1-like [Salmo salar]
contig_0061129	contig_0061129	1..2024	1.49	-1.06	-2.08	0.00931	0.07	1	1.49	-2.38	-5.22	2.73e-05	0.000397	1		Transposable element Tcb1 transposase [Salmo salar]
contig_0137741	contig_0137741	1..584	3.44	-1.05	-2.08	0.03	0.15	1	3.44	-2.78	-6.87	0.000297	0.00296	1		PREDICTED: cytosolic purine 5'-nucleotidase-like isoform X2 [Salmo salar]
contig_0004940	contig_0004940	1..2542	132.66	-1.07	-2.09	3.75e-19	1.04e-16	1.02e-13	132.66	-2.04	-4.12	8.42e-62	1.51e-58	2.24e-56		PREDICTED: serine protease 27-like [Salmo salar]
contig_0016368	contig_0016368	1..1225	1.77	-1.06	-2.09	0.02	0.13	1	1.77	-2.32	-4.98	0.000354	0.00343	1		PREDICTED: uncharacterized protein LOC106600457 [Salmo salar]
contig_0021616	contig_0021616	1..309	7.02	-1.06	-2.09	0.02	0.13	1	7.02	-2.32	-4.98	0.000354	0.00343	1		PREDICTED: plectin-like isoform X2 [Salmo salar]
contig_0022273	contig_0022273	1..1640	1.94	-1.06	-2.09	0.0076	0.06	1	1.94	-2	-4.01	6.55e-05	0.000834	1		PREDICTED: CMRF35-like molecule 1 [Salmo salar]
contig_0058070	contig_0058070	1..882	2.46	-1.06	-2.09	0.02	0.13	1	2.46	-2.32	-4.98	0.000354	0.00343	1		PREDICTED: zinc finger and BTB domain-containing protein 37-like [Salmo salar]
contig_0059551	contig_0059551	1..4501	1.15	-1.06	-2.09	0.000458	0.00849	1	1.15	-2.59	-6	4.35e-08	1.36e-06	0.01		PREDICTED: FRAS1-related extracellular matrix protein 2-like [Salmo salar]
contig_0155851	contig_0155851	1..1818	1.19	-1.06	-2.09	0.02	0.13	1	1.19	-2.32	-4.98	0.000354	0.00343	1		not available
contig_0016424	contig_0016424	1..1252	1.4	-1.07	-2.1	0.04	0.18	1	1.4	-2.01	-4.02	0.00231	0.02	1		PREDICTED: moesin-like [Salmo salar]
contig_0033244	contig_0033244	1..2207	1.25	-1.07	-2.1	0.01	0.09	1	1.25	-2.92	-7.55	2.39e-05	0.000353	1		PREDICTED: folliculin-interacting protein 1-like isoform X2 [Salmo salar]
contig_0047415	contig_0047415	1..2174	0.54	-1.07	-2.1	0.08	0.29	1	0.54	-2.96	-7.76	0.005	0.03	1		not available
contig_0049702	contig_0049702	1..742	2.35	-1.07	-2.1	0.04	0.18	1	2.35	-2.26	-4.8	0.00137	0.01	1		PREDICTED: uncharacterized protein LOC106593684 isoform X1 [Salmo salar]
contig_0054539	contig_0054539	1..527	5.22	-1.07	-2.1	0.01	0.09	1	5.22	-2.66	-6.32	3.29e-05	0.000464	1		PREDICTED: uncharacterized protein LOC106611326 isoform X1 [Salmo salar]
contig_0078683	contig_0078683	1..881	1.32	-1.07	-2.1	0.08	0.29	1	1.32	-2.96	-7.76	0.005	0.03	1		not available
contig_0079061	contig_0079061	1..1920	0.61	-1.07	-2.1	0.08	0.29	1	0.61	-3.88	-14.72	0.00598	0.03	1		PREDICTED: CUB and sushi domain-containing protein 3-like isoform X3 [Salmo salar]
contig_0089192	contig_0089192	1..610	1.91	-1.07	-2.1	0.08	0.29	1	1.91	-2.4	-5.27	0.00709	0.04	1		not available
contig_0110106	contig_0110106	1..2563	0.91	-1.07	-2.1	0.02	0.11	1	0.91	-2.99	-7.95	8.97e-05	0.00109	1		not available
contig_0115237	contig_0115237	1..510	3.43	-1.07	-2.1	0.04	0.18	1	3.43	-2.98	-7.88	0.000639	0.00552	1		PREDICTED: macoilin-1-like, partial [Salmo salar]
contig_0122958	contig_0122958	1..665	2.63	-1.07	-2.1	0.04	0.18	1	2.63	-2.58	-5.97	0.000866	0.00709	1		PREDICTED: B-cell lymphoma/leukemia 11A-like, partial [Salmo salar]
contig_0144316	contig_0144316	1..524	3.33	-1.07	-2.1	0.04	0.18	1	3.33	-2.01	-4.02	0.00231	0.02	1		not available
contig_0145446	contig_0145446	1..654	1.78	-1.07	-2.1	0.08	0.29	1	1.78	-3.88	-14.72	0.00598	0.03	1		PREDICTED: SH3 and PX domain-containing protein 2B-like isoform X2 [Salmo salar]
contig_0147175	contig_0147175	1..1550	1.5	-1.07	-2.1	0.02	0.11	1	1.5	-2.01	-4.03	0.000498	0.00451	1		not available
contig_0151237	contig_0151237	1..1602	1.45	-1.07	-2.1	0.02	0.11	1	1.45	-2.2	-4.6	0.000295	0.00294	1		PREDICTED: A disintegrin and metalloproteinase with thrombospondin motifs 9-like [Salmo salar]
contig_0013111	contig_0013111	1..4130	17.52	-1.08	-2.11	3.61e-15	6.74e-13	9.81e-10	17.52	-2.01	-4.03	1.78e-40	1.7e-37	4.74e-35		PREDICTED: uncharacterized protein LOC106594372 isoform X4 [Salmo salar]
contig_0054627	contig_0054627	1..2427	1.44	-1.08	-2.11	0.00514	0.05	1	1.44	-2.02	-4.04	2.98e-05	0.000425	1		PREDICTED: insulin receptor-like isoform X1 [Salmo salar]
contig_0058956	contig_0058956	1..1093	3.2	-1.08	-2.11	0.00514	0.05	1	3.2	-2.43	-5.38	6.54e-06	0.000116	1		PREDICTED: group XIIA secretory phospholipase A2-like isoform X1 [Salmo salar]
contig_0091489	contig_0091489	1..5881	0.72	-1.08	-2.11	0.00246	0.03	1	0.72	-2.07	-4.21	4.3e-06	8.03e-05	1		PREDICTED: ATP-binding cassette sub-family G member 4-like [Salmo salar]
contig_0109115	contig_0109115	1..519	6.73	-1.08	-2.11	0.00514	0.05	1	6.73	-2.02	-4.04	2.98e-05	0.000425	1		PREDICTED: brain natriuretic peptide-like isoform X2 [Salmo salar]
contig_0159197	contig_0159197	1..1785	2.28	-1.08	-2.11	0.00294	0.03	1	2.28	-2.02	-4.05	8.07e-06	0.000139	1		PREDICTED: SH3 and PX domain-containing protein 2A-like isoform X3 [Salmo salar]
contig_0030821	contig_0030821	1..227	5.83	-1.08	-2.12	0.06	0.24	1	5.83	-2.58	-5.98	0.00351	0.02	1		PREDICTED: uncharacterized protein LOC106587650 isoform X3 [Salmo salar]
contig_0046707	contig_0046707	1..778	1.7	-1.08	-2.12	0.06	0.24	1	1.7	-2.18	-4.53	0.00561	0.03	1		PREDICTED: cysteine protease ATG4B-like isoform X1 [Salmo salar]
contig_0049017	contig_0049017	1..898	1.47	-1.08	-2.12	0.06	0.24	1	1.47	-2.18	-4.53	0.00561	0.03	1		PREDICTED: uncharacterized protein LOC106562497, partial [Salmo salar]
contig_0049565	contig_0049565	1..651	2.93	-1.08	-2.12	0.03	0.15	1	2.93	-2.7	-6.51	0.000452	0.00419	1		Transposable element Tcb1 transposase [Salmo salar]
contig_0056771	contig_0056771	1..364	3.64	-1.08	-2.12	0.06	0.24	1	3.64	-3.14	-8.81	0.00273	0.02	1		PREDICTED: set1/Ash2 histone methyltransferase complex subunit ASH2 isoform X2 [Salmo salar]
contig_0062640	contig_0062640	1..784	2.43	-1.08	-2.12	0.03	0.15	1	2.43	-3.66	-12.66	0.000404	0.00382	1		not available
contig_0079520	contig_0079520	1..1004	1.32	-1.08	-2.12	0.06	0.24	1	1.32	-4.06	-16.72	0.00389	0.02	1		PREDICTED: olfactory receptor 11A1-like [Salmo salar]
contig_0090211	contig_0090211	1..1443	0.92	-1.08	-2.12	0.06	0.24	1	0.92	-2.18	-4.53	0.00561	0.03	1		Deoxyribonuclease gamma precursor [Salmo salar]
contig_0093026	contig_0093026	1..1307	1.46	-1.08	-2.12	0.03	0.15	1	1.46	-2.13	-4.38	0.00113	0.00879	1		collagen Type XI Alpha2 [Salmo salar]
contig_0101039	contig_0101039	1..1028	1.29	-1.08	-2.12	0.06	0.24	1	1.29	-3.14	-8.81	0.00273	0.02	1		PREDICTED: epithelial splicing regulatory protein 1-like [Salmo salar]
contig_0104033	contig_0104033	1..1273	2.54	-1.09	-2.12	0.00626	0.06	1	2.54	-2.03	-4.08	5.25e-05	0.000691	1		PREDICTED: aprataxin and PNK-like factor isoform X1 [Salmo salar]
contig_0117044	contig_0117044	1..629	2.1	-1.08	-2.12	0.06	0.24	1	2.1	-2.18	-4.53	0.00561	0.03	1		UPF0527 membrane protein [Salmo salar]
contig_0190638	contig_0190638	1..410	3.23	-1.08	-2.12	0.06	0.24	1	3.23	-2.18	-4.53	0.00561	0.03	1		not available
contig_0023819	contig_0023819	1..1366	4.96	-1.09	-2.13	6.04e-05	0.00166	1	4.96	-2.04	-4.11	3.61e-09	1.44e-07	0.000962		PREDICTED: ankyrin repeat domain-containing protein 11-like isoform X2 [Salmo salar]
contig_0086436	contig_0086436	1..3001	3.33	-1.09	-2.13	2.88e-06	0.000123	0.78	3.33	-2.73	-6.64	6.26e-15	6.92e-13	1.67e-09		PREDICTED: uncharacterized protein LOC106561221 [Salmo salar]
contig_0006729	contig_0006729	1..925	3.2	-1.1	-2.14	0.00768	0.07	1	3.2	-2.36	-5.13	3.39e-05	0.000475	1		not available
contig_0018245	contig_0018245	1..1887	11.19	-1.1	-2.14	1.25e-09	1.11e-07	0.000341	11.19	-2.27	-4.84	2.57e-23	8.01e-21	6.84e-18		PREDICTED: WD repeat-containing protein 11 isoform X1 [Salmo salar]
contig_0025259	contig_0025259	1..1831	1.21	-1.1	-2.14	0.02	0.11	1	1.21	-2.61	-6.1	0.000182	0.00197	1		PREDICTED: uncharacterized protein LOC106611174 [Salmo salar]
contig_0046478	contig_0046478	1..3390	0.44	-1.1	-2.14	0.05	0.21	1	0.44	-2.03	-4.08	0.00456	0.03	1		not available
contig_0047441	contig_0047441	1..1725	34.25	-1.1	-2.14	1.01e-14	1.81e-12	2.75e-09	34.25	-2.02	-4.05	3.22e-37	2.7e-34	8.56e-32		PREDICTED: endothelial PAS domain-containing protein 1-like isoform X4 [Salmo salar]
contig_0057545	contig_0057545	1..2936	3.01	-1.09	-2.14	7.94e-06	0.000298	1	3.01	-2.04	-4.11	3.29e-11	1.98e-09	8.76e-06		PREDICTED: collagen alpha-1(XXI) chain-like isoform X2 [Salmo salar]
contig_0064956	contig_0064956	1..791	1.87	-1.1	-2.14	0.05	0.21	1	1.87	-2.03	-4.08	0.00456	0.03	1		transposase [Salmo salar]
contig_0082125	contig_0082125	1..368	4.03	-1.1	-2.14	0.05	0.21	1	4.03	-2.03	-4.08	0.00456	0.03	1		not available
contig_0090468	contig_0090468	1..1020	2.18	-1.1	-2.14	0.02	0.11	1	2.18	-2.13	-4.39	0.000467	0.0043	1		PREDICTED: uncharacterized protein LOC106565892 [Salmo salar]
contig_0112088	contig_0112088	1..1221	2.43	-1.1	-2.14	0.00768	0.07	1	2.43	-3.34	-10.11	1.04e-05	0.000173	1		PREDICTED: uncharacterized protein LOC106576475 [Salmo salar]
contig_0130156	contig_0130156	1..1367	1.08	-1.1	-2.14	0.05	0.21	1	1.08	-2.34	-5.07	0.00272	0.02	1		PREDICTED: leucine-rich repeat and calponin homology domain-containing protein 1 isoform X2 [Salmo salar]
contig_0132365	contig_0132365	1..862	1.72	-1.1	-2.14	0.05	0.21	1	1.72	-2.74	-6.69	0.0018	0.01	1		PREDICTED: cell migration-inducing and hyaluronan-binding protein-like [Salmo salar]
contig_0142855	contig_0142855	1..1445	1.03	-1.1	-2.14	0.05	0.21	1	1.03	-2.03	-4.08	0.00456	0.03	1		PREDICTED: sorting nexin-18-like [Salmo salar]
contig_0062933	contig_0062933	1..463	3.54	-1.11	-2.15	0.04	0.18	1	3.54	-2.17	-4.51	0.0022	0.01	1		hypothetical protein [Salmo salar]
contig_0009390	contig_0009390	1..432	5.88	-1.11	-2.16	0.01	0.09	1	5.88	-2.54	-5.83	7.61e-05	0.000945	1		PREDICTED: plectin-like isoform X2 [Salmo salar]
contig_0028113	contig_0028113	1..2405	3.1	-1.11	-2.16	2.34e-05	0.00075	1	3.1	-3.23	-9.41	3.08e-12	2.22e-10	8.2e-07		PREDICTED: uncharacterized protein LOC106608107 isoform X1 [Salmo salar]
contig_0069240	contig_0069240	1..2340	2.67	-1.11	-2.16	9.03e-05	0.00233	1	2.67	-2.53	-5.79	6.59e-10	3.05e-08	0.000175		PREDICTED: glutenin, high molecular weight subunit DY10-like isoform X3 [Salmo salar]
contig_0042965	contig_0042965	1..2143	6.69	-1.12	-2.17	5.87e-08	3.87e-06	0.02	6.69	-2.84	-7.15	3.02e-20	6.62e-18	8.05e-15		PREDICTED: uncharacterized protein LOC106613429 [Salmo salar]
contig_0055959	contig_0055959	1..363	4.96	-1.11	-2.17	0.03	0.15	1	4.96	-2.62	-6.15	0.000695	0.00592	1		PREDICTED: trichohyalin-like isoform X6 [Salmo salar]
contig_0077936	contig_0077936	1..788	2.28	-1.11	-2.17	0.03	0.15	1	2.28	-2.05	-4.14	0.00181	0.01	1		PREDICTED: solute carrier family 2, facilitated glucose transporter member 1-like isoform X3 [Salmo salar]
contig_0092107	contig_0092107	1..1930	0.93	-1.11	-2.17	0.03	0.15	1	0.93	-4.5	-22.7	0.00129	0.0098	1		PREDICTED: glutenin, high molecular weight subunit DY10-like isoform X3 [Salmo salar]
contig_0147540	contig_0147540	1..1087	1.66	-1.11	-2.17	0.03	0.15	1	1.66	-3.58	-11.96	0.000555	0.00493	1		PREDICTED: collagen alpha-1(V) chain-like isoform X3 [Salmo salar]
contig_0016589	contig_0016589	1..737	2.66	-1.12	-2.18	0.02	0.13	1	2.66	-3.7	-13.01	0.000346	0.00337	1		PREDICTED: transforming growth factor beta receptor type 3-like [Salmo salar]
contig_0043851	contig_0043851	1..1815	1.08	-1.12	-2.18	0.02	0.13	1	1.08	-3.7	-13.01	0.000346	0.00337	1		PREDICTED: solute carrier family 22 member 13-like isoform X5 [Salmo salar]
contig_0060478	contig_0060478	1..465	2.28	-1.12	-2.18	0.09	0.29	1	2.28	-3.74	-13.39	0.00815	0.04	1		not available
contig_0090949	contig_0090949	1..281	3.77	-1.12	-2.18	0.09	0.29	1	3.77	-3.74	-13.39	0.00815	0.04	1		olfactory receptor family C subfamily 4 member 9 [Salmo salar]
contig_0095403	contig_0095403	1..1722	2.89	-1.13	-2.18	0.000317	0.00635	1	2.89	-2.21	-4.61	4.08e-07	1.01e-05	0.11		PREDICTED: uncharacterized protein LOC106600457 [Salmo salar]
contig_0096914	contig_0096914	1..641	1.65	-1.12	-2.18	0.09	0.29	1	1.65	-3.74	-13.39	0.00815	0.04	1		not available
contig_0109588	contig_0109588	1..1832	3.61	-1.12	-2.18	5.02e-05	0.00142	1	3.61	-2.28	-4.85	9.32e-10	4.18e-08	0.000248		PREDICTED: collagen alpha-1(XVIII) chain-like [Salmo salar]
contig_0125858	contig_0125858	1..373	2.84	-1.12	-2.18	0.09	0.29	1	2.84	-2.82	-7.06	0.00767	0.04	1		PREDICTED: uncharacterized protein LOC106595671 [Salmo salar]
contig_0001797	contig_0001797	1..1132	1.08	-1.13	-2.19	0.07	0.25	1	1.08	-3.02	-8.11	0.00406	0.02	1		Transposable element Tcb1 transposase [Salmo salar]
contig_0009228	contig_0009228	1..1715	0.71	-1.13	-2.19	0.07	0.25	1	0.71	-2.06	-4.17	0.00925	0.05	1		not available
contig_0013716	contig_0013716	1..568	2.14	-1.13	-2.19	0.07	0.25	1	2.14	-2.06	-4.17	0.00925	0.05	1		PREDICTED: putative ferric-chelate reductase 1 [Salmo salar]
contig_0017335	contig_0017335	1..598	2.04	-1.13	-2.19	0.07	0.25	1	2.04	-2.46	-5.5	0.00558	0.03	1		PREDICTED: aftiphilin-like isoform X1 [Salmo salar]
contig_0050744	contig_0050744	1..4190	2.38	-1.13	-2.19	1.69e-06	7.82e-05	0.46	2.38	-2.26	-4.79	2.7e-13	2.3e-11	7.18e-08		PREDICTED: collagen alpha-3(VI) chain-like [Salmo salar]
contig_0058029	contig_0058029	1..1626	1.95	-1.13	-2.19	0.00514	0.05	1	1.95	-2.87	-7.29	6.7e-06	0.000118	1		PREDICTED: homeobox protein cut-like 1 isoform X6 [Salmo salar]
contig_0059692	contig_0059692	1..732	4.56	-1.13	-2.19	0.00423	0.04	1	4.56	-2.72	-6.58	5.18e-06	9.49e-05	1		PREDICTED: myocyte-specific enhancer factor 2C-like [Salmo salar]
contig_0061220	contig_0061220	1..1377	2.42	-1.13	-2.19	0.00423	0.04	1	2.42	-2.07	-4.21	3.39e-05	0.000475	1		High mobility group-T protein [Salmo salar]
contig_0084176	contig_0084176	1..1807	2.84	-1.13	-2.19	0.000257	0.00537	1	2.84	-3.15	-8.87	1.38e-08	4.86e-07	0.00368		PREDICTED: proto-oncogene DBL-like isoform X1 [Salmo salar]
contig_0113085	contig_0113085	1..5315	0.4	-1.13	-2.19	0.02	0.11	1	0.4	-2.85	-7.23	0.000197	0.00211	1		PREDICTED: tyrosine-protein phosphatase non-receptor type 11-like isoform X2 [Salmo salar]
contig_0135504	contig_0135504	1..1572	0.77	-1.13	-2.19	0.07	0.25	1	0.77	-2.46	-5.5	0.00558	0.03	1		PREDICTED: 40S ribosomal protein S5-like [Salmo salar]
contig_0159719	contig_0159719	1..801	1.52	-1.13	-2.19	0.07	0.25	1	1.52	-2.46	-5.5	0.00558	0.03	1		PREDICTED: triple functional domain protein-like, partial [Salmo salar]
contig_0160930	contig_0160930	1..1468	0.83	-1.13	-2.19	0.07	0.25	1	0.83	-3.02	-8.11	0.00406	0.02	1		not available
contig_0186102	contig_0186102	1..1065	1.14	-1.13	-2.19	0.07	0.25	1	1.14	-2.46	-5.5	0.00558	0.03	1		PREDICTED: membrane-associated phosphatidylinositol transfer protein 2-like isoform X3 [Salmo salar]
contig_0199881	contig_0199881	1..2046	0.6	-1.13	-2.19	0.07	0.25	1	0.6	-2.46	-5.5	0.00558	0.03	1		PREDICTED: coiled-coil domain-containing protein 3-like [Salmo salar]
contig_0021688	contig_0021688	1..1289	1.07	-1.14	-2.2	0.05	0.21	1	1.07	-4.12	-17.38	0.0034	0.02	1		not available
contig_0040068	contig_0040068	1..265	9.19	-1.14	-2.2	0.01	0.09	1	9.19	-2.74	-6.68	7.89e-05	0.000974	1		PREDICTED: guanylate cyclase 2G-like [Salmo salar]
contig_0048662	contig_0048662	1..3901	3.15	-1.14	-2.2	1.91e-07	1.13e-05	0.05	3.15	-2.1	-4.29	1.1e-14	1.16e-12	2.92e-09		PREDICTED: transforming growth factor beta receptor type 3-like [Salmo salar]
contig_0058028	contig_0058028	1..2784	2.45	-1.14	-2.2	3.41e-05	0.00103	1	2.45	-2.48	-5.59	1.6e-10	8.38e-09	4.27e-05		PREDICTED: homeobox protein cut-like 1 [Salmo salar]
contig_0064062	contig_0064062	1..531	6.58	-1.14	-2.2	0.00349	0.04	1	6.58	-3	-8.01	2.17e-06	4.42e-05	0.58		not available
contig_0072931	contig_0072931	1..2651	0.52	-1.14	-2.2	0.05	0.21	1	0.52	-3.2	-9.16	0.00225	0.02	1		PREDICTED: zinc finger protein 519-like [Salmo salar]
contig_0099416	contig_0099416	1..2530	0.96	-1.14	-2.2	0.01	0.09	1	0.96	-2.26	-4.8	0.000188	0.00202	1		PREDICTED: growth hormone receptor-like isoform X1 [Salmo salar]
contig_0116338	contig_0116338	1..922	1.49	-1.14	-2.2	0.05	0.21	1	1.49	-2.64	-6.22	0.0028	0.02	1		PREDICTED: serine--tRNA ligase, mitochondrial isoform X1 [Salmo salar]
contig_0123495	contig_0123495	1..858	1.6	-1.14	-2.2	0.05	0.21	1	1.6	-2.64	-6.22	0.0028	0.02	1		not available
contig_0147646	contig_0147646	1..1366	1.01	-1.14	-2.2	0.05	0.21	1	1.01	-2.23	-4.71	0.00439	0.03	1		Cytochrome P450 7A1 [Salmo salar]
contig_0156105	contig_0156105	1..519	2.65	-1.14	-2.2	0.05	0.21	1	2.65	-3.2	-9.16	0.00225	0.02	1		not available
contig_0055434	contig_0055434	1..464	8.9	-1.15	-2.21	0.00168	0.02	1	8.9	-4.22	-18.59	7.33e-07	1.7e-05	0.2		PREDICTED: adhesive plaque matrix protein-like, partial [Salmo salar]
contig_0094645	contig_0094645	1..1292	2.01	-1.14	-2.21	0.00953	0.08	1	2.01	-2.83	-7.12	4.31e-05	0.000583	1		PREDICTED: probable cyclin-dependent serine/threonine-protein kinase DDB_G0292550 [Salmo salar]
contig_0101769	contig_0101769	1..1116	1.38	-1.15	-2.21	0.04	0.18	1	1.38	-3.35	-10.21	0.0013	0.00984	1		PREDICTED: laminin subunit beta-2-like [Salmo salar]
contig_0124929	contig_0124929	1..878	1.75	-1.15	-2.21	0.04	0.18	1	1.75	-2.08	-4.22	0.00357	0.02	1		PREDICTED: zinc finger protein 665-like, partial [Salmo salar]
contig_0150129	contig_0150129	1..2165	0.71	-1.15	-2.21	0.04	0.18	1	0.71	-2.79	-6.93	0.00145	0.01	1		PREDICTED: calcium/calmodulin-dependent protein kinase II inhibitor 2-like [Salmo salar]
contig_0175448	contig_0175448	1..2050	0.75	-1.15	-2.21	0.04	0.18	1	0.75	-2.08	-4.22	0.00357	0.02	1		not available
contig_0078522	contig_0078522	1..1136	1.49	-1.15	-2.22	0.03	0.16	1	1.49	-2.93	-7.65	0.000781	0.00649	1		not available
contig_0088168	contig_0088168	1..917	1.85	-1.15	-2.22	0.03	0.16	1	1.85	-2.53	-5.79	0.00108	0.00849	1		PREDICTED: glutenin, high molecular weight subunit DY10-like isoform X1 [Salmo salar]
contig_0112396	contig_0112396	1..1732	0.98	-1.15	-2.22	0.03	0.16	1	0.98	-2.93	-7.65	0.000781	0.00649	1		PREDICTED: putative pre-mRNA-splicing factor ATP-dependent RNA helicase DHX32 [Salmo salar]
contig_0116550	contig_0116550	1..2493	3.44	-1.15	-2.22	4.52e-06	0.000183	1	3.44	-2.81	-7.02	2.46e-13	2.11e-11	6.56e-08		PREDICTED: interferon-induced GTP-binding protein Mx-like isoform X2 [Salmo salar]
contig_0153909	contig_0153909	1..1951	1.57	-1.15	-2.22	0.00513	0.05	1	1.57	-2.09	-4.26	6.02e-05	0.000779	1		PREDICTED: acetylcholinesterase collagenic tail peptide-like isoform X2 [Salmo salar]
contig_0020202	contig_0020202	1..3141	2.16	-1.16	-2.23	2.8e-05	0.000876	1	2.16	-2.47	-5.55	1.97e-10	1.01e-08	5.25e-05		PREDICTED: PH domain leucine-rich repeat-containing protein phosphatase 2-like isoform X2 [Salmo salar]
contig_0051685	contig_0051685	1..1118	1.66	-1.16	-2.23	0.02	0.13	1	1.66	-2.09	-4.26	0.00143	0.01	1		PREDICTED: uncharacterized protein LOC106568450 [Salmo salar]
contig_0060894	contig_0060894	1..340	10.9	-1.16	-2.23	0.00239	0.03	1	10.9	-3.09	-8.5	1.05e-06	2.34e-05	0.28		PREDICTED: integrin alpha-V-like, partial [Salmo salar]
contig_0075119	contig_0075119	1..2273	2.17	-1.16	-2.23	0.00026	0.00543	1	2.17	-2.01	-4.03	1.41e-06	3.02e-05	0.37		PREDICTED: CREB3 regulatory factor-like isoform X6 [Salmo salar]
contig_0088910	contig_0088910	1..532	3.78	-1.16	-2.23	0.02	0.12	1	3.78	-2.21	-4.62	0.000705	0.00598	1		RCC2 homolog [Salmo salar]
contig_0028380	contig_0028380	1..1460	5.29	-1.16	-2.24	9.12e-06	0.000336	1	5.29	-2.11	-4.31	2.12e-10	1.08e-08	5.64e-05		PREDICTED: uncharacterized protein LOC106600457 [Salmo salar]
contig_0051145	contig_0051145	1..1537	1.52	-1.17	-2.24	0.01	0.09	1	1.52	-2.2	-4.6	0.000295	0.00294	1		PREDICTED: nidogen-1-like [Salmo salar]
contig_0069100	contig_0069100	1..4074	0.53	-1.16	-2.24	0.01	0.1	1	0.53	-2.32	-4.98	0.000354	0.00343	1		PREDICTED: mitotic interactor and substrate of PLK1-like isoform X1 [Salmo salar]
contig_0171968	contig_0171968	1..925	2.52	-1.17	-2.24	0.01	0.09	1	2.52	-2.42	-5.35	0.000181	0.00196	1		not available
contig_0078939	contig_0078939	1..831	3.19	-1.17	-2.25	0.00772	0.07	1	3.19	-2.38	-5.22	7.74e-05	0.000958	1		PREDICTED: uncharacterized protein LOC106566315 [Salmo salar]
contig_0082261	contig_0082261	1..2147	1.16	-1.17	-2.25	0.00954	0.08	1	1.16	-2.77	-6.83	6.44e-05	0.000822	1		PREDICTED: uncharacterized protein LOC106600457 [Salmo salar]
contig_0083567	contig_0083567	1..704	3.99	-1.17	-2.25	0.00627	0.06	1	3.99	-2.28	-4.85	6.52e-05	0.000831	1		not available
contig_0001018	contig_0001018	1..3570	456.36	-1.18	-2.26	1.84e-24	7.26e-22	5e-19	456.36	-2.13	-4.39	2.01e-75	5.52e-72	5.35e-70		Hemoglobin subunit alpha [Salmo salar]
contig_0120236	contig_0120236	1..1171	5.06	-1.18	-2.26	6.13e-05	0.00168	1	5.06	-3.19	-9.12	4.01e-10	1.96e-08	0.000107		PREDICTED: uncharacterized protein LOC106602113, partial [Salmo salar]
contig_0044441	contig_0044441	1..2404	1.56	-1.18	-2.27	0.00197	0.03	1	1.56	-2.01	-4.02	1.71e-05	0.000265	1		vacuolar protein sorting 52 [Salmo salar]
contig_0083624	contig_0083624	1..2454	5.22	-1.18	-2.27	5.19e-08	3.46e-06	0.01	5.22	-2.35	-5.11	1.3e-16	1.81e-14	3.45e-11		PREDICTED: nuclear factor 1 C-type-like isoform X5 [Salmo salar]
contig_0041324	contig_0041324	1..451	2.46	-1.19	-2.28	0.07	0.25	1	2.46	-2.33	-5.03	0.00904	0.04	1		PREDICTED: transcriptional enhancer factor TEF-1 isoform X1 [Salmo salar]
contig_0051133	contig_0051133	1..1934	7.39	-1.19	-2.28	1.27e-08	9.49e-07	0.00345	7.39	-2.09	-4.25	2.57e-16	3.45e-14	6.84e-11		not available
contig_0052050	contig_0052050	1..1820	3.98	-1.19	-2.28	1.07e-05	0.000385	1	3.98	-3.33	-10.05	5.93e-12	4.06e-10	1.58e-06		PREDICTED: uncharacterized protein LOC106605599 isoform X1 [Salmo salar]
contig_0063692	contig_0063692	1..831	1.34	-1.19	-2.28	0.07	0.25	1	1.34	-2.33	-5.03	0.00904	0.04	1		not available
contig_0064258	contig_0064258	1..330	3.37	-1.19	-2.28	0.07	0.25	1	3.37	-2.89	-7.41	0.00617	0.03	1		PREDICTED: extracellular calcium-sensing receptor-like isoform X1 [Salmo salar]
contig_0064994	contig_0064994	1..1338	5.18	-1.19	-2.28	1.56e-05	0.00053	1	5.18	-2.59	-6.03	7.03e-11	3.96e-09	1.87e-05		PREDICTED: peptidyl-prolyl cis-trans isomerase A-like isoform X1 [Salmo salar]
contig_0099743	contig_0099743	1..1008	1.1	-1.19	-2.28	0.07	0.25	1	1.1	-2.89	-7.41	0.00617	0.03	1		PREDICTED: ATP-binding cassette sub-family C member 9-like [Salmo salar]
contig_0153127	contig_0153127	1..1028	1.08	-1.19	-2.28	0.07	0.25	1	1.08	-3.81	-14.06	0.00696	0.04	1		PREDICTED: fos-related antigen 2 isoform X2 [Salmo salar]
contig_0167852	contig_0167852	1..1180	0.94	-1.19	-2.28	0.07	0.25	1	0.94	-2.33	-5.03	0.00904	0.04	1		PREDICTED: guanine nucleotide exchange factor VAV3 isoform X3 [Salmo salar]
contig_0168029	contig_0168029	1..493	2.25	-1.19	-2.28	0.07	0.25	1	2.25	-2.33	-5.03	0.00904	0.04	1		PREDICTED: death-inducer obliterator 1-like [Salmo salar]
contig_0002108	contig_0002108	1..1882	34.15	-1.19	-2.29	2.46e-17	5.87e-15	6.7e-12	34.15	-2.1	-4.28	9.22e-41	9.01e-38	2.45e-35		PREDICTED: endothelial PAS domain-containing protein 1-like isoform X1 [Salmo salar]
contig_0011936	contig_0011936	1..1097	2.03	-1.2	-2.29	0.01	0.09	1	2.03	-2.13	-4.39	0.000467	0.0043	1		PREDICTED: uncharacterized protein LOC106564134, partial [Salmo salar]
contig_0015200	contig_0015200	1..1541	1.44	-1.2	-2.29	0.01	0.09	1	1.44	-3.33	-10.02	0.00012	0.00139	1		Deoxyribonuclease gamma precursor [Salmo salar]
contig_0034557	contig_0034557	1..563	2.82	-1.2	-2.29	0.03	0.16	1	2.82	-2.84	-7.17	0.00118	0.0091	1		PREDICTED: cyclin-dependent kinase inhibitor 3 isoform X2 [Salmo salar]
contig_0047538	contig_0047538	1..2653	0.54	-1.19	-2.29	0.04	0.18	1	0.54	-2.29	-4.89	0.00345	0.02	1		PREDICTED: ovarian cancer G-protein coupled receptor 1-like [Salmo salar]
contig_0051513	contig_0051513	1..3530	0.54	-1.2	-2.29	0.02	0.12	1	0.54	-2.39	-5.24	0.000683	0.00583	1		PREDICTED: uncharacterized protein LOC106595063 [Salmo salar]
contig_0053981	contig_0053981	1..2471	0.71	-1.2	-2.29	0.02	0.13	1	0.71	-2.01	-4.02	0.00231	0.02	1		PREDICTED: GATA zinc finger domain-containing protein 14-like [Salmo salar]
contig_0054583	contig_0054583	1..1540	0.93	-1.19	-2.29	0.04	0.18	1	0.93	-2.29	-4.89	0.00345	0.02	1		not available
contig_0056818	contig_0056818	1..628	2.53	-1.2	-2.29	0.03	0.16	1	2.53	-4.32	-20.04	0.00205	0.01	1		not available
contig_0057772	contig_0057772	1..622	2.04	-1.19	-2.29	0.05	0.21	1	2.04	-2.12	-4.35	0.00719	0.04	1		PREDICTED: dynein heavy chain 8, axonemal-like [Salmo salar]
contig_0058232	contig_0058232	1..557	3.14	-1.2	-2.29	0.02	0.13	1	3.14	-2.01	-4.02	0.00231	0.02	1		PREDICTED: uncharacterized protein LOC106578007 isoform X2 [Salmo salar]
contig_0065289	contig_0065289	1..965	2.14	-1.2	-2.29	0.01	0.1	1	2.14	-2.82	-7.05	0.000242	0.00249	1		not available
contig_0071581	contig_0071581	1..2322	0.75	-1.2	-2.29	0.02	0.13	1	0.75	-2.26	-4.8	0.00137	0.01	1		PREDICTED: tetratricopeptide repeat protein 28-like [Salmo salar]
contig_0084971	contig_0084971	1..374	5.94	-1.2	-2.29	0.01	0.09	1	5.94	-3.33	-10.02	0.00012	0.00139	1		PREDICTED: cdc42 effector protein 4-like [Salmo salar]
contig_0086301	contig_0086301	1..285	6.13	-1.2	-2.29	0.02	0.13	1	6.13	-2.26	-4.8	0.00137	0.01	1		PREDICTED: striatin-4-like isoform X1 [Salmo salar]
contig_0090559	contig_0090559	1..357	3.56	-1.19	-2.29	0.05	0.21	1	3.56	-4	-16.05	0.00447	0.03	1		not available
contig_0105640	contig_0105640	1..1344	1.06	-1.19	-2.29	0.04	0.18	1	1.06	-3.25	-9.51	0.00187	0.01	1		PREDICTED: glypican-6-like isoform X2 [Salmo salar]
contig_0115133	contig_0115133	1..1259	1.14	-1.19	-2.29	0.04	0.18	1	1.14	-2.29	-4.89	0.00345	0.02	1		not available
contig_0127107	contig_0127107	1..689	1.84	-1.19	-2.29	0.05	0.21	1	1.84	-4	-16.05	0.00447	0.03	1		not available
contig_0133515	contig_0133515	1..902	1.58	-1.19	-2.29	0.04	0.18	1	1.58	-3.25	-9.51	0.00187	0.01	1		Transposable element Tcb1 transposase [Salmo salar]
contig_0137532	contig_0137532	1..284	6.15	-1.2	-2.29	0.02	0.13	1	6.15	-2.01	-4.02	0.00231	0.02	1		PREDICTED: ankyrin-3-like [Salmo salar]
contig_0138310	contig_0138310	1..2362	0.81	-1.2	-2.29	0.02	0.12	1	0.81	-2.7	-6.51	0.000452	0.00419	1		PREDICTED: A disintegrin and metalloproteinase with thrombospondin motifs 20-like isoform X1 [Salmo salar]
contig_0149753	contig_0149753	1..1127	1.13	-1.19	-2.29	0.05	0.21	1	1.13	-3.08	-8.46	0.00332	0.02	1		PREDICTED: apoptosis-inducing factor 3-like isoform X1 [Salmo salar]
contig_0154897	contig_0154897	1..754	2.74	-1.2	-2.29	0.01	0.1	1	2.74	-3.22	-9.31	0.000205	0.00217	1		Deoxyribonuclease gamma precursor [Salmo salar]
contig_0233829	contig_0233829	1..446	4.99	-1.2	-2.29	0.01	0.09	1	4.99	-2.35	-5.11	0.000283	0.00284	1		not available
contig_0005418	contig_0005418	1..351	36.65	-1.2	-2.3	3.07e-08	2.13e-06	0.00836	36.65	-2.1	-4.28	3.56e-15	4.09e-13	9.49e-10		PREDICTED: LOW QUALITY PROTEIN: neuroblast differentiation-associated protein AHNAK-like [Salmo salar]
contig_0015841	contig_0015841	1..1838	1.9	-1.2	-2.3	0.00233	0.03	1	1.9	-2.59	-6.04	4.2e-06	7.86e-05	1		PREDICTED: neurofibromin-like isoform X3 [Salmo salar]
contig_0042806	contig_0042806	1..4366	0.62	-1.2	-2.3	0.00624	0.06	1	0.62	-2.41	-5.33	6.23e-05	0.0008	1		PREDICTED: uncharacterized protein LOC106600457 [Salmo salar]
contig_0057323	contig_0057323	1..4192	4.62	-1.2	-2.3	1.92e-10	1.96e-08	5.22e-05	4.62	-2.02	-4.04	1.59e-19	3.17e-17	4.24e-14		PREDICTED: uncharacterized protein LOC106605384, partial [Salmo salar]
contig_0083142	contig_0083142	1..499	7	-1.2	-2.3	0.00233	0.03	1	7	-3.98	-15.73	3.25e-06	6.28e-05	0.87		PREDICTED: uncharacterized protein LOC106593948 [Salmo salar]
contig_0020535	contig_0020535	1..3499	1.88	-1.21	-2.32	1.86e-05	0.000617	1	1.88	-2.34	-5.08	7.15e-10	3.29e-08	0.00019		PREDICTED: serine/threonine-protein phosphatase 6 regulatory ankyrin repeat subunit C-like isoform X1 [Salmo salar]
contig_0044019	contig_0044019	1..1831	6.65	-1.22	-2.32	4.48e-08	3.01e-06	0.01	6.65	-2.05	-4.15	2.7e-14	2.7e-12	7.18e-09		PREDICTED: uncharacterized protein LOC106600457 [Salmo salar]
contig_0080243	contig_0080243	1..494	22.4	-1.22	-2.32	1.27e-07	7.88e-06	0.03	79.52	2.01	4.02	3.36e-35	2.57e-32	8.94e-30		not available
contig_0083834	contig_0083834	1..609	5.04	-1.22	-2.34	0.00338	0.04	1	5.04	-4.35	-20.37	2.2e-05	0.000329	1		not available
contig_0047944	contig_0047944	1..1081	2.11	-1.23	-2.35	0.00951	0.08	1	2.11	-2.39	-5.23	0.000226	0.00236	1		PREDICTED: KN motif and ankyrin repeat domain-containing protein 4-like [Salmo salar]
contig_0058711	contig_0058711	1..3570	0.64	-1.23	-2.35	0.00951	0.08	1	0.64	-2.39	-5.23	0.000226	0.00236	1		PREDICTED: trichohyalin-like [Salmo salar]
contig_0079818	contig_0079818	1..955	2.38	-1.23	-2.35	0.00951	0.08	1	2.38	-2.17	-4.49	0.000371	0.00356	1		Guanylate-binding protein 7 [Salmo salar]
contig_0092342	contig_0092342	1..977	2.49	-1.23	-2.35	0.00766	0.07	1	2.49	-3.05	-8.31	6.13e-05	0.00079	1		not available
contig_0141261	contig_0141261	1..2778	0.88	-1.23	-2.35	0.00766	0.07	1	0.88	-2.07	-4.21	0.000314	0.00311	1		PREDICTED: zinc transporter 2-like [Salmo salar]
contig_0170108	contig_0170108	1..377	5.62	-1.23	-2.35	0.01	0.09	1	5.62	-2.06	-4.18	0.000744	0.00625	1		not available
contig_0048537	contig_0048537	1..405	15.69	-1.24	-2.36	1.83e-05	0.000608	1	15.69	-2.22	-4.66	2.72e-09	1.11e-07	0.000724		not available
contig_0013548	contig_0013548	1..345	4.76	-1.24	-2.37	0.02	0.13	1	4.76	-2.89	-7.41	0.000957	0.00769	1		myosin 1, partial [Salmo salar]
contig_0018217	contig_0018217	1..1105	1.34	-1.25	-2.37	0.03	0.16	1	1.34	-2.03	-4.08	0.00456	0.03	1		ORF2 protein [Salmo salar]
contig_0034564	contig_0034564	1..1292	1.27	-1.24	-2.37	0.02	0.13	1	1.27	-2.89	-7.41	0.000957	0.00769	1		ZK1236.4 [Salmo salar]
contig_0083005	contig_0083005	1..1438	1.03	-1.25	-2.37	0.03	0.16	1	1.03	-2.74	-6.69	0.0018	0.01	1		PREDICTED: serine--tRNA ligase, mitochondrial isoform X2 [Salmo salar]
contig_0109835	contig_0109835	1..673	2.44	-1.24	-2.37	0.02	0.13	1	2.44	-2.49	-5.61	0.00136	0.01	1		PREDICTED: PHD finger protein 21A-like isoform X5 [Salmo salar]
contig_0118383	contig_0118383	1..619	2.39	-1.25	-2.37	0.03	0.16	1	2.39	-3.3	-9.86	0.00155	0.01	1		not available
contig_0001077	contig_0001077	1..450	3399.52	-1.25	-2.38	2.23e-27	1.04e-24	6.07e-22	3399.52	-2.24	-4.73	9.66e-83	4.33e-79	2.57e-77		Hemoglobin subunit alpha [Salmo salar]
contig_0024750	contig_0024750	1..1041	7.58	-1.25	-2.38	2.32e-06	0.000102	0.63	7.58	-2.69	-6.46	2.94e-12	2.13e-10	7.83e-07		PREDICTED: zinc finger BED domain-containing protein 1-like [Salmo salar]
contig_0089016	contig_0089016	1..745	4.19	-1.25	-2.38	0.00274	0.03	1	4.19	-2.12	-4.33	4.83e-05	0.000643	1		PREDICTED: microtubule-associated serine/threonine-protein kinase 1-like [Salmo salar]
contig_0092792	contig_0092792	1..1700	0.78	-1.25	-2.38	0.04	0.18	1	0.78	-2.18	-4.53	0.00561	0.03	1		PREDICTED: fasciculation and elongation protein zeta-2-like isoform X2 [Salmo salar]
contig_0042006	contig_0042006	1..1404	2.94	-1.26	-2.39	0.000759	0.01	1	2.94	-2.14	-4.41	3.88e-06	7.34e-05	1		PREDICTED: peptidyl-prolyl cis-trans isomerase FKBP9-like [Salmo salar]
contig_0047320	contig_0047320	1..410	2.84	-1.26	-2.39	0.05	0.21	1	2.84	-2.96	-7.76	0.005	0.03	1		PREDICTED: latent-transforming growth factor beta-binding protein 3-like isoform X6 [Salmo salar]
contig_0079349	contig_0079349	1..2176	1.9	-1.26	-2.39	0.000759	0.01	1	1.9	-2.04	-4.1	6.54e-06	0.000116	1		PREDICTED: E3 ubiquitin-protein ligase RNF5-like [Salmo salar]
contig_0083024	contig_0083024	1..607	1.92	-1.26	-2.39	0.05	0.21	1	1.92	-2.96	-7.76	0.005	0.03	1		tubulin tyrosine ligase-like family member 6a [Salmo salar]
contig_0147197	contig_0147197	1..567	2.05	-1.26	-2.39	0.05	0.21	1	2.05	-2.4	-5.27	0.00709	0.04	1		PREDICTED: uncharacterized protein LOC106574060 [Salmo salar]
contig_0149855	contig_0149855	1..1658	0.7	-1.26	-2.39	0.05	0.21	1	0.7	-3.88	-14.72	0.00598	0.03	1		PREDICTED: RNA-binding protein Nova-1-like isoform X1 [Salmo salar]
contig_0185223	contig_0185223	1..449	2.59	-1.26	-2.39	0.05	0.21	1	2.59	-2.4	-5.27	0.00709	0.04	1		PREDICTED: cytochrome P450 1B1-like [Salmo salar]
contig_0044643	contig_0044643	1..1293	2.95	-1.26	-2.4	0.00107	0.02	1	2.95	-2.55	-5.86	1.91e-06	3.96e-05	0.51		PREDICTED: UDP-N-acetylglucosamine transporter-like isoform X1 [Salmo salar]
contig_0100422	contig_0100422	1..2511	0.93	-1.26	-2.4	0.0076	0.06	1	0.93	-4.88	-29.35	0.000473	0.00435	1		PREDICTED: F-BAR and double SH3 domains protein 1 isoform X2 [Salmo salar]
contig_0045189	contig_0045189	1..1033	0.97	-1.27	-2.41	0.07	0.25	1	0.97	-3.67	-12.73	0.00959	0.05	1		Transposable element Tcb1 transposase [Salmo salar]
contig_0053435	contig_0053435	1..548	1.84	-1.27	-2.41	0.07	0.25	1	1.84	-2.75	-6.71	0.00958	0.05	1		PREDICTED: zinc finger protein 883-like [Salmo salar]
contig_0095646	contig_0095646	1..442	2.28	-1.27	-2.41	0.07	0.25	1	2.28	-3.67	-12.73	0.00959	0.05	1		PREDICTED: sonic hedgehog protein A-like [Salmo salar]
contig_0101573	contig_0101573	1..267	3.77	-1.27	-2.41	0.07	0.25	1	3.77	-3.67	-12.73	0.00959	0.05	1		PREDICTED: serine-rich adhesin for platelets-like isoform X1 [Salmo salar]
contig_0109870	contig_0109870	1..1335	0.75	-1.27	-2.41	0.07	0.25	1	0.75	-3.67	-12.73	0.00959	0.05	1		PREDICTED: proto-oncogene DBL-like isoform X1 [Salmo salar]
contig_0123086	contig_0123086	1..1983	2.35	-1.27	-2.41	0.000384	0.00738	1	2.35	-2.02	-4.05	2.32e-06	4.68e-05	0.62		PREDICTED: voltage-dependent calcium channel subunit alpha-2/delta-1-like [Salmo salar]
contig_0138381	contig_0138381	1..1621	0.62	-1.27	-2.41	0.07	0.25	1	0.62	-2.75	-6.71	0.00958	0.05	1		PREDICTED: PR domain zinc finger protein 2-like isoform X1 [Salmo salar]
contig_0143212	contig_0143212	1..2707	0.37	-1.27	-2.41	0.07	0.25	1	0.37	-2.75	-6.71	0.00958	0.05	1		not available
contig_0148808	contig_0148808	1..467	2.15	-1.27	-2.41	0.07	0.25	1	2.15	-2.75	-6.71	0.00958	0.05	1		PREDICTED: mutS protein homolog 5-like isoform X1 [Salmo salar]
contig_0150394	contig_0150394	1..526	1.91	-1.27	-2.41	0.07	0.25	1	1.91	-2.75	-6.71	0.00958	0.05	1		PREDICTED: CD276 antigen-like isoform X1 [Salmo salar]
contig_0229758	contig_0229758	1..1552	0.65	-1.27	-2.41	0.07	0.25	1	0.65	-2.75	-6.71	0.00958	0.05	1		PREDICTED: lysosomal protective protein-like [Salmo salar]
contig_0024856	contig_0024856	1..2648	1.2	-1.27	-2.42	0.00223	0.03	1	1.2	-2.87	-7.29	6.7e-06	0.000118	1		PREDICTED: basement membrane-specific heparan sulfate proteoglycan core protein-like isoform X13 [Salmo salar]
contig_0093317	contig_0093317	1..3792	2.29	-1.27	-2.42	6.48e-07	3.37e-05	0.18	2.29	-2.33	-5.04	3.06e-12	2.21e-10	8.15e-07		PREDICTED: protocadherin Fat 1-like isoform X3 [Salmo salar]
contig_0100308	contig_0100308	1..634	6.85	-1.27	-2.42	0.000529	0.00949	1	6.85	-2.11	-4.31	2.83e-06	5.56e-05	0.75		PREDICTED: neuronal-specific septin-3-like [Salmo salar]
contig_0003874	contig_0003874	1..1543	1.2	-1.28	-2.43	0.01	0.1	1	1.2	-3.06	-8.36	0.000432	0.00404	1		hypothetical protein, partial [Salmo salar]
contig_0081366	contig_0081366	1..1109	4.39	-1.28	-2.43	8.97e-05	0.00231	1	4.39	-2.38	-5.21	2.23e-07	5.89e-06	0.06		PREDICTED: arrestin red cell isoform 1-like, partial [Salmo salar]
contig_0100738	contig_0100738	1..1125	1.65	-1.28	-2.43	0.01	0.1	1	1.65	-2.09	-4.26	0.00143	0.01	1		PREDICTED: probable basic-leucine zipper transcription factor F [Salmo salar]
contig_0042829	contig_0042829	1..1706	15.48	-1.29	-2.44	1.59e-13	2.48e-11	4.32e-08	15.48	-2.1	-4.29	4.67e-25	1.75e-22	1.24e-19		PREDICTED: mpv17-like protein [Salmo salar]
contig_0051568	contig_0051568	1..322	8.38	-1.29	-2.44	0.00401	0.04	1	8.38	-2.22	-4.67	0.000101	0.00121	1		not available
contig_0111109	contig_0111109	1..2412	0.7	-1.29	-2.44	0.02	0.12	1	0.7	-2.53	-5.79	0.00108	0.00849	1		PREDICTED: uncharacterized protein LOC106577141 [Salmo salar]
contig_0112100	contig_0112100	1..1179	1.44	-1.29	-2.44	0.02	0.12	1	1.44	-2.93	-7.65	0.000781	0.00649	1		PREDICTED: MTSS1-like protein isoform X2 [Salmo salar]
contig_0117626	contig_0117626	1..329	5.15	-1.29	-2.44	0.02	0.12	1	5.15	-2.53	-5.79	0.00108	0.00849	1		PREDICTED: trans-1,2-dihydrobenzene-1,2-diol dehydrogenase-like [Salmo salar]
contig_0008806	contig_0008806	1..5950	1.19	-1.29	-2.45	3.76e-06	0.000156	1	1.19	-2.82	-7.04	1.92e-11	1.21e-09	5.11e-06		PREDICTED: nck-associated protein 5-like isoform X1 [Salmo salar]
contig_0014046	contig_0014046	1..217	11.71	-1.29	-2.45	0.00493	0.05	1	11.71	-3.12	-8.67	4.23e-05	0.000574	1		PREDICTED: NACHT, LRR and PYD domains-containing protein 3-like [Salmo salar]
contig_0023804	contig_0023804	1..1646	5.34	-1.29	-2.45	4.41e-07	2.4e-05	0.12	5.34	-3.47	-11.08	5.46e-14	5.13e-12	1.45e-08		PREDICTED: GTPase-activating Rap/Ran-GAP domain-like protein 3, partial [Salmo salar]
contig_0025409	contig_0025409	1..2698	15.99	-1.29	-2.45	5.27e-17	1.2e-14	1.43e-11	15.99	-2.06	-4.16	1.24e-32	8.21e-30	3.3e-27		PREDICTED: collagen alpha-5(IV) chain-like [Salmo salar]
contig_0069569	contig_0069569	1..425	5.98	-1.29	-2.45	0.00493	0.05	1	5.98	-2.33	-5.01	0.00012	0.00139	1		PREDICTED: chromodomain-helicase-DNA-binding protein 2-like isoform X3 [Salmo salar]
contig_0102309	contig_0102309	1..5775	0.76	-1.29	-2.45	0.000437	0.00817	1	0.76	-2.61	-6.09	3.31e-07	8.4e-06	0.09		PREDICTED: nesprin-2-like isoform X8 [Salmo salar]
contig_0005050	contig_0005050	1..256	6	-1.3	-2.46	0.02	0.13	1	6	-2.39	-5.25	0.00215	0.01	1		PREDICTED: phosphatidylinositol 3,4,5-trisphosphate 5-phosphatase 1-like isoform X2 [Salmo salar]
contig_0022035	contig_0022035	1..1252	1.23	-1.3	-2.46	0.02	0.13	1	1.23	-2.39	-5.25	0.00215	0.01	1		PREDICTED: transmembrane protein 136-like [Salmo salar]
contig_0029530	contig_0029530	1..2898	6.78	-1.3	-2.46	1.2e-11	1.48e-09	3.27e-06	6.78	-2.67	-6.38	4.88e-25	1.82e-22	1.3e-19		RCC2 homolog [Salmo salar]
contig_0045351	contig_0045351	1..300	24.35	-1.3	-2.46	2.56e-06	0.000112	0.7	24.35	-2.21	-4.63	2.56e-10	1.29e-08	6.82e-05		PREDICTED: hydroperoxide isomerase ALOXE3-like [Salmo salar]
contig_0063963	contig_0063963	1..1919	5.05	-1.3	-2.46	1.33e-07	8.2e-06	0.04	5.05	-2.22	-4.66	7.41e-13	5.92e-11	1.97e-07		PREDICTED: E3 ubiquitin-protein ligase RNF213-like [Salmo salar]
contig_0065409	contig_0065409	1..1718	0.89	-1.3	-2.46	0.02	0.13	1	0.89	-2.39	-5.25	0.00215	0.01	1		PREDICTED: zinc finger CCCH domain-containing protein 11A-like isoform X1 [Salmo salar]
contig_0068000	contig_0068000	1..1955	0.79	-1.3	-2.46	0.02	0.13	1	0.79	-2.79	-6.93	0.00145	0.01	1		transposase [Salmo salar]
contig_0070997	contig_0070997	1..1743	1.37	-1.3	-2.46	0.00607	0.06	1	1.37	-2.23	-4.7	0.000235	0.00244	1		PREDICTED: lys-63-specific deubiquitinase BRCC36-like isoform X2 [Salmo salar]
contig_0119552	contig_0119552	1..679	2.26	-1.3	-2.46	0.02	0.13	1	2.26	-4.28	-19.38	0.00231	0.02	1		PREDICTED: zinc finger homeobox protein 3 isoform X3 [Salmo salar]
contig_0120647	contig_0120647	1..1677	0.92	-1.3	-2.46	0.02	0.13	1	0.92	-2.08	-4.22	0.00357	0.02	1		not available
contig_0191200	contig_0191200	1..2470	0.62	-1.3	-2.46	0.02	0.13	1	0.62	-3.35	-10.21	0.0013	0.00984	1		not available
contig_0108013	contig_0108013	1..1290	1.72	-1.3	-2.47	0.00752	0.06	1	1.72	-2.13	-4.39	0.000467	0.0043	1		not available
contig_0141619	contig_0141619	1..2179	1.02	-1.3	-2.47	0.00752	0.06	1	1.02	-2.61	-6.1	0.000182	0.00197	1		Cell division protein kinase 2 [Salmo salar]
contig_0002442	contig_0002442	1..2495	0.83	-1.31	-2.48	0.00937	0.07	1	0.83	-2.82	-7.05	0.000242	0.00249	1		PREDICTED: phosphatidylinositol-binding clathrin assembly protein isoform X4 [Salmo salar]
contig_0026340	contig_0026340	1..2432	0.57	-1.31	-2.48	0.03	0.16	1	0.57	-2.23	-4.71	0.00439	0.03	1		Calcium/calmodulin-dependent protein kinase type II delta chain, partial [Salmo salar]
contig_0040349	contig_0040349	1..664	4.38	-1.31	-2.48	0.00265	0.03	1	4.38	-3	-7.99	1.35e-05	0.000217	1		PREDICTED: Y' element ATP-dependent helicase YEL077C-like [Salmo salar]
contig_0063012	contig_0063012	1..1329	1.04	-1.31	-2.48	0.03	0.16	1	1.04	-2.64	-6.22	0.0028	0.02	1		not available
contig_0064718	contig_0064718	1..1373	1	-1.31	-2.48	0.03	0.16	1	1	-2.23	-4.71	0.00439	0.03	1		PREDICTED: DENN domain-containing protein 2A-like [Salmo salar]
contig_0068558	contig_0068558	1..933	1.48	-1.31	-2.48	0.03	0.16	1	1.48	-2.64	-6.22	0.0028	0.02	1		PREDICTED: ankyrin-1-like isoform X11 [Salmo salar]
contig_0096986	contig_0096986	1..927	3.14	-1.31	-2.48	0.00265	0.03	1	3.14	-3.31	-9.93	1.23e-05	0.000199	1		PREDICTED: adenomatous polyposis coli protein-like isoform X1 [Salmo salar]
contig_0105850	contig_0105850	1..1159	1.19	-1.31	-2.48	0.03	0.16	1	1.19	-2.64	-6.22	0.0028	0.02	1		PREDICTED: sodium-dependent phosphate transporter 2-like [Salmo salar]
contig_0127440	contig_0127440	1..2311	1.26	-1.31	-2.48	0.00265	0.03	1	1.26	-2.01	-4.04	0.000117	0.00137	1		PREDICTED: zinc finger protein 431-like isoform X18 [Salmo salar]
contig_0166389	contig_0166389	1..471	2.92	-1.31	-2.48	0.03	0.16	1	2.92	-4.12	-17.38	0.0034	0.02	1		not available
contig_0056791	contig_0056791	1..517	13.62	-1.31	-2.49	3.01e-06	0.000128	0.82	13.62	-2.45	-5.45	1.09e-10	5.91e-09	2.91e-05		PREDICTED: nuclear GTPase SLIP-GC-like isoform X2 [Salmo salar]
contig_0002909	contig_0002909	1..2250	77.24	-1.32	-2.5	4.75e-26	2.11e-23	1.29e-20	77.24	-2.43	-5.38	3.22e-72	7.65e-69	8.57e-67		40S ribosomal protein S11 [Salmo salar]
contig_0040054	contig_0040054	1..332	13.55	-1.32	-2.5	0.000297	0.00603	1	13.55	-2.27	-4.81	9.14e-07	2.06e-05	0.24		not available
contig_0056701	contig_0056701	1..214	5.69	-1.32	-2.5	0.04	0.18	1	5.69	-2.46	-5.5	0.00558	0.03	1		PREDICTED: probable ATP-dependent RNA helicase ddx6 isoform X2 [Salmo salar]
contig_0058209	contig_0058209	1..1980	0.61	-1.32	-2.5	0.04	0.18	1	0.61	-2.06	-4.17	0.00925	0.05	1		collagen Type XI Alpha2 [Salmo salar]
contig_0060374	contig_0060374	1..1115	1.09	-1.32	-2.5	0.04	0.18	1	1.09	-2.06	-4.17	0.00925	0.05	1		PREDICTED: thioredoxin domain-containing protein 5-like [Salmo salar]
contig_0090434	contig_0090434	1..1787	1.07	-1.32	-2.5	0.01	0.09	1	1.07	-2.39	-5.24	0.000683	0.00583	1		not available
contig_0091373	contig_0091373	1..438	2.78	-1.32	-2.5	0.04	0.18	1	2.78	-2.06	-4.17	0.00925	0.05	1		Transposable element Tcb1 transposase [Salmo salar]
contig_0117743	contig_0117743	1..1633	0.75	-1.32	-2.5	0.04	0.18	1	0.75	-2.06	-4.17	0.00925	0.05	1		PREDICTED: uncharacterized protein LOC106594308 [Salmo salar]
contig_0131600	contig_0131600	1..2196	1.18	-1.32	-2.5	0.00395	0.04	1	1.18	-2.17	-4.49	0.000159	0.00176	1		not available
contig_0147884	contig_0147884	1..1098	1.11	-1.32	-2.5	0.04	0.18	1	1.11	-2.06	-4.17	0.00925	0.05	1		PREDICTED: ubiquitin-like modifier-activating enzyme 1 [Salmo salar]
contig_0154313	contig_0154313	1..304	4.01	-1.32	-2.5	0.04	0.18	1	4.01	-2.46	-5.5	0.00558	0.03	1		PREDICTED: formin-like protein 2 isoform X3 [Salmo salar]
contig_0155690	contig_0155690	1..1270	0.96	-1.32	-2.5	0.04	0.18	1	0.96	-2.06	-4.17	0.00925	0.05	1		not available
contig_0157118	contig_0157118	1..1081	1.13	-1.32	-2.5	0.04	0.18	1	1.13	-2.46	-5.5	0.00558	0.03	1		PREDICTED: clathrin heavy chain 1-like isoform X4 [Salmo salar]
contig_0161399	contig_0161399	1..2347	0.52	-1.32	-2.5	0.04	0.18	1	0.52	-2.06	-4.17	0.00925	0.05	1		not available
contig_0170576	contig_0170576	1..1436	0.85	-1.32	-2.5	0.04	0.18	1	0.85	-3.94	-15.39	0.00516	0.03	1		PREDICTED: RNA binding protein fox-1 homolog 2-like [Salmo salar]
contig_0195758	contig_0195758	1..1690	0.72	-1.32	-2.5	0.04	0.18	1	0.72	-2.06	-4.17	0.00925	0.05	1		PREDICTED: thrombospondin-type laminin G domain and EAR repeat-containing protein-like [Salmo salar]
contig_0215122	contig_0215122	1..1738	0.7	-1.32	-2.5	0.04	0.18	1	0.7	-3.02	-8.11	0.00406	0.02	1		PREDICTED: AP2-associated protein kinase 1-like isoform X1 [Salmo salar]
contig_0031850	contig_0031850	1..985	3.01	-1.33	-2.52	0.00213	0.03	1	3.01	-2.77	-6.8	1.47e-05	0.000232	1		PREDICTED: uncharacterized protein LOC106600457 [Salmo salar]
contig_0103580	contig_0103580	1..2081	1.76	-1.33	-2.52	0.00083	0.01	1	1.76	-2.66	-6.31	2.3e-06	4.65e-05	0.61		PREDICTED: calcipressin-3 isoform X1 [Salmo salar]
contig_0028987	contig_0028987	1..305	7.46	-1.34	-2.53	0.00598	0.06	1	7.46	-2.39	-5.23	0.000226	0.00236	1		PREDICTED: uncharacterized protein KIAA0556-like [Salmo salar]
contig_0065841	contig_0065841	1..303	9.26	-1.34	-2.53	0.00259	0.03	1	9.26	-5.14	-35.34	0.00022	0.00231	1		PREDICTED: plectin-like [Salmo salar]
contig_0108581	contig_0108581	1..1965	0.54	-1.34	-2.53	0.05	0.21	1	0.54	-2.82	-7.06	0.00767	0.04	1		not available
contig_0171502	contig_0171502	1..1250	0.85	-1.34	-2.53	0.05	0.21	1	0.85	-2.82	-7.06	0.00767	0.04	1		UPF0527 membrane protein [Salmo salar]
contig_0070697	contig_0070697	1..1762	0.9	-1.35	-2.54	0.02	0.12	1	0.9	-2.13	-4.37	0.0028	0.02	1		PREDICTED: upstream stimulatory factor 2-like [Salmo salar]
contig_0089497	contig_0089497	1..889	1.79	-1.35	-2.54	0.02	0.12	1	1.79	-2.13	-4.37	0.0028	0.02	1		PREDICTED: nuclear prelamin A recognition factor-like [Salmo salar]
contig_0182927	contig_0182927	1..1328	1.2	-1.35	-2.54	0.02	0.12	1	1.2	-2.13	-4.37	0.0028	0.02	1		PREDICTED: ral GTPase-activating protein subunit beta-like isoform X9 [Salmo salar]
contig_0208593	contig_0208593	1..297	5.35	-1.35	-2.54	0.02	0.12	1	5.35	-2.44	-5.43	0.0017	0.01	1		not available
contig_0043289	contig_0043289	1..642	3.3	-1.35	-2.55	0.00742	0.06	1	3.3	-2.06	-4.18	0.000744	0.00625	1		not available
contig_0064598	contig_0064598	1..1190	13.88	-1.35	-2.55	4.1e-11	4.67e-09	1.12e-05	13.88	-2.21	-4.61	4.77e-19	9.01e-17	1.27e-13		not available
contig_0095989	contig_0095989	1..912	2.9	-1.35	-2.55	0.00316	0.04	1	2.9	-2.38	-5.22	7.74e-05	0.000958	1		PREDICTED: uroplakin-3b-like protein [Salmo salar]
contig_0109662	contig_0109662	1..803	8.77	-1.35	-2.55	1.95e-06	8.86e-05	0.53	8.77	-2.71	-6.53	3.24e-11	1.95e-09	8.62e-06		not available
contig_0155025	contig_0155025	1..2831	0.75	-1.35	-2.55	0.00742	0.06	1	0.75	-2.28	-4.86	0.000444	0.00413	1		PREDICTED: protein furry homolog-like isoform X14 [Salmo salar]
contig_0011417	contig_0011417	1..346	2068.08	-1.35	-2.56	5.08e-31	3.08e-28	1.38e-25	2068.08	-2.29	-4.91	9.84e-83	4.33e-79	2.62e-77		Hemoglobin subunit alpha-4 [Salmo salar]
contig_0004606	contig_0004606	1..1325	1.08	-1.36	-2.57	0.02	0.13	1	1.08	-2.29	-4.89	0.00345	0.02	1		not available
contig_0069114	contig_0069114	1..2683	0.93	-1.36	-2.57	0.00387	0.04	1	0.93	-3.09	-8.49	5.09e-05	0.000673	1		PREDICTED: uncharacterized protein LOC106579344 [Salmo salar]
contig_0085617	contig_0085617	1..2341	0.61	-1.36	-2.57	0.02	0.13	1	0.61	-2.69	-6.46	0.00224	0.02	1		PREDICTED: protocadherin Fat 4-like [Salmo salar]
contig_0140283	contig_0140283	1..2018	0.71	-1.36	-2.57	0.02	0.13	1	0.71	-3.25	-9.51	0.00187	0.01	1		PREDICTED: uncharacterized protein LOC106597293 [Salmo salar]
contig_0223852	contig_0223852	1..1199	3.71	-1.36	-2.57	0.000235	0.00501	1	3.71	-2.04	-4.12	3.15e-06	6.1e-05	0.84		not available
contig_0004512	contig_0004512	1..364	54.25	-1.37	-2.58	1.47e-12	2.06e-10	3.99e-07	54.25	-3.52	-11.46	1.69e-27	7.57e-25	4.49e-22		PREDICTED: sodium/potassium-transporting ATPase subunit alpha-1-like isoform X1 [Salmo salar]
contig_0033391	contig_0033391	1..1224	4.37	-1.37	-2.58	1.98e-05	0.000653	1	4.37	-2.51	-5.71	3.85e-08	1.21e-06	0.01		PREDICTED: ankyrin repeat and BTB/POZ domain-containing protein 2 isoform X1 [Salmo salar]
contig_0004579	contig_0004579	1..1765	17.43	-1.38	-2.59	4.68e-16	9.57e-14	1.27e-10	17.43	-3.74	-13.41	2.34e-39	2.12e-36	6.23e-34		SPATA5 [Salmo salar]
contig_0005904	contig_0005904	1..1697	1.37	-1.37	-2.59	0.00476	0.05	1	1.37	-2.01	-4.03	0.000498	0.00451	1		PREDICTED: protein patched homolog 1 [Salmo salar]
contig_0073344	contig_0073344	1..1365	8.76	-1.37	-2.59	2.72e-09	2.27e-07	0.00074	8.76	-2.34	-5.06	1.06e-15	1.32e-13	2.82e-10		PREDICTED: SEC14-like protein 1 isoform X1 [Salmo salar]
contig_0099028	contig_0099028	1..817	2.2	-1.38	-2.59	0.01	0.09	1	2.2	-2.62	-6.15	0.000695	0.00592	1		PREDICTED: homeobox protein DBX1-B-like [Salmo salar]
contig_0124512	contig_0124512	1..1055	2.21	-1.37	-2.59	0.00476	0.05	1	2.21	-3.95	-15.47	0.000126	0.00145	1		hypothetical protein [Salmo salar]
contig_0127864	contig_0127864	1..296	6.08	-1.38	-2.59	0.01	0.09	1	6.08	-2.31	-4.95	0.00108	0.00849	1		PREDICTED: rho GTPase-activating protein 20-like [Salmo salar]
contig_0143384	contig_0143384	1..597	3.9	-1.37	-2.59	0.00476	0.05	1	3.9	-3.95	-15.47	0.000126	0.00145	1		PREDICTED: endonuclease domain-containing 1 protein-like isoform X2 [Salmo salar]
contig_0004513	contig_0004513	1..352	62.56	-1.38	-2.6	1.74e-13	2.71e-11	4.73e-08	62.56	-2.98	-7.88	6.32e-29	3.21e-26	1.68e-23		PREDICTED: titin-like [Salmo salar]
contig_0103366	contig_0103366	1..2807	0.96	-1.38	-2.6	0.00253	0.03	1	0.96	-2.22	-4.67	0.000101	0.00121	1		PREDICTED: uncharacterized protein LOC106604004 [Salmo salar]
contig_0124256	contig_0124256	1..1658	1.63	-1.38	-2.6	0.00253	0.03	1	1.63	-2.41	-5.33	6.23e-05	0.0008	1		not available
contig_0149930	contig_0149930	1..382	574.27	-1.38	-2.6	5.64e-29	3e-26	1.53e-23	574.27	-2.49	-5.61	9.18e-80	3.51e-76	2.44e-74		alpha-globin, partial [Salmo salar]
contig_0005723	contig_0005723	1..1273	4.53	-1.38	-2.61	8.67e-06	0.000321	1	4.53	-3.51	-11.37	1.97e-09	8.3e-08	0.000524		PREDICTED: protein NLRC3-like isoform X1 [Salmo salar]
contig_0060724	contig_0060724	1..1478	0.86	-1.38	-2.61	0.03	0.16	1	0.86	-3.08	-8.46	0.00332	0.02	1		PREDICTED: receptor-type tyrosine-protein phosphatase eta-like isoform X1 [Salmo salar]
contig_0101341	contig_0101341	1..1338	0.95	-1.38	-2.61	0.03	0.16	1	0.95	-3.08	-8.46	0.00332	0.02	1		CRFB5c [Salmo salar]
contig_0150480	contig_0150480	1..495	2.57	-1.38	-2.61	0.03	0.16	1	2.57	-2.12	-4.35	0.00719	0.04	1		PREDICTED: zinc finger protein 318-like [Salmo salar]
contig_0159292	contig_0159292	1..657	1.93	-1.38	-2.61	0.03	0.16	1	1.93	-2.52	-5.74	0.00441	0.03	1		PREDICTED: uncharacterized protein LOC106608326 isoform X2 [Salmo salar]
contig_0257759	contig_0257759	1..272	7.98	-1.38	-2.61	0.00587	0.05	1	7.98	-2.1	-4.28	0.000589	0.00518	1		PREDICTED: periodic tryptophan protein 1 homolog [Salmo salar]
contig_0041107	contig_0041107	1..1766	1.44	-1.39	-2.62	0.00308	0.03	1	1.44	-3.12	-8.67	4.23e-05	0.000574	1		peroxisome proliferator-activated receptor alpha [Salmo salar]
contig_0064314	contig_0064314	1..3850	2.58	-1.39	-2.62	2.23e-08	1.59e-06	0.00605	2.58	-2.59	-6.03	1.67e-14	1.74e-12	4.45e-09		PREDICTED: vesicular glutamate transporter 1-like [Salmo salar]
contig_0071688	contig_0071688	1..1759	3.4	-1.39	-2.62	5.77e-06	0.000225	1	3.4	-2.21	-4.63	7.55e-09	2.81e-07	0.00201		PREDICTED: plectin-like isoform X5 [Salmo salar]
contig_0099575	contig_0099575	1..710	4.1	-1.39	-2.63	0.00167	0.02	1	4.1	-2.01	-4.04	0.000117	0.00137	1		PREDICTED: integrin alpha-8-like isoform X2 [Salmo salar]
contig_0099741	contig_0099741	1..297	5.53	-1.39	-2.63	0.01	0.1	1	5.53	-2.49	-5.61	0.00136	0.01	1		PREDICTED: glutenin, high molecular weight subunit DY10-like isoform X3 [Salmo salar]
contig_0101135	contig_0101135	1..1834	0.89	-1.39	-2.63	0.01	0.1	1	0.89	-2.17	-4.51	0.0022	0.01	1		PREDICTED: palmitoleoyl-protein carboxylesterase notum1a-like [Salmo salar]
contig_0135587	contig_0135587	1..1275	2.28	-1.39	-2.63	0.00167	0.02	1	2.28	-2.01	-4.04	0.000117	0.00137	1		PREDICTED: zinc finger E-box-binding homeobox 2-like isoform X2 [Salmo salar]
contig_0012548	contig_0012548	1..1008	21.27	-1.4	-2.64	1.46e-13	2.3e-11	3.96e-08	21.27	-2.12	-4.34	5.2e-22	1.39e-19	1.38e-16		PREDICTED: band 3 anion exchange protein-like [Salmo salar]
contig_0042617	contig_0042617	1..808	7.67	-1.4	-2.64	3.85e-06	0.000159	1	7.67	-3.42	-10.7	1.79e-10	9.28e-09	4.75e-05		PREDICTED: plectin-like isoform X12 [Salmo salar]
contig_0067662	contig_0067662	1..901	2.23	-1.4	-2.64	0.00729	0.06	1	2.23	-2.47	-5.52	0.000436	0.00406	1		not available
contig_0159053	contig_0159053	1..1931	1.7	-1.4	-2.64	0.000929	0.01	1	1.7	-3.17	-9	3.79e-06	7.18e-05	1		PREDICTED: collagen alpha-1(V) chain-like isoform X4 [Salmo salar]
contig_0013714	contig_0013714	1..663	4.15	-1.41	-2.65	0.00202	0.03	1	4.15	-2.92	-7.55	2.39e-05	0.000353	1		not available
contig_0016666	contig_0016666	1..422	2.63	-1.41	-2.66	0.04	0.18	1	2.63	-2.33	-5.03	0.00904	0.04	1		PREDICTED: eosinophil peroxidase-like [Salmo salar]
contig_0017558	contig_0017558	1..1168	0.95	-1.41	-2.66	0.04	0.18	1	0.95	-2.33	-5.03	0.00904	0.04	1		PREDICTED: uncharacterized protein LOC106592023 [Salmo salar]
contig_0038444	contig_0038444	1..1160	11.55	-1.41	-2.66	2.44e-10	2.45e-08	6.64e-05	11.55	-3.02	-8.11	1.37e-19	2.75e-17	3.66e-14		not available
contig_0045457	contig_0045457	1..546	2.04	-1.41	-2.66	0.04	0.18	1	2.04	-3.81	-14.06	0.00696	0.04	1		Transposable element Tcb1 transposase [Salmo salar]
contig_0050893	contig_0050893	1..909	1.22	-1.41	-2.66	0.04	0.18	1	1.22	-2.89	-7.41	0.00617	0.03	1		transposase [Salmo salar]
contig_0053866	contig_0053866	1..1239	0.9	-1.41	-2.66	0.04	0.18	1	0.9	-2.33	-5.03	0.00904	0.04	1		not available
contig_0075599	contig_0075599	1..325	3.42	-1.41	-2.66	0.04	0.18	1	3.42	-2.33	-5.03	0.00904	0.04	1		Serine/threonine-protein kinase VRK3 [Salmo salar]
contig_0104127	contig_0104127	1..584	1.9	-1.41	-2.66	0.04	0.18	1	1.9	-2.33	-5.03	0.00904	0.04	1		PREDICTED: olfactory receptor 4D1-like [Salmo salar]
contig_0110825	contig_0110825	1..497	2.24	-1.41	-2.66	0.04	0.18	1	2.24	-2.33	-5.03	0.00904	0.04	1		not available
contig_0116738	contig_0116738	1..428	2.6	-1.41	-2.66	0.04	0.18	1	2.6	-3.81	-14.06	0.00696	0.04	1		PREDICTED: zinc finger MYM-type protein 1-like isoform X1 [Salmo salar]
contig_0165440	contig_0165440	1..537	2.07	-1.41	-2.66	0.04	0.18	1	2.07	-2.33	-5.03	0.00904	0.04	1		PREDICTED: uncharacterized protein LOC106592891 [Salmo salar]
contig_0176075	contig_0176075	1..1017	1.09	-1.41	-2.66	0.04	0.18	1	1.09	-2.33	-5.03	0.00904	0.04	1		not available
contig_0013281	contig_0013281	1..1837	2.71	-1.42	-2.67	2.32e-05	0.000748	1	2.71	-2.94	-7.65	2.94e-08	9.56e-07	0.00784		zinc finger protein 180-like protein isoform X2 [Salmo salar]
contig_0036879	contig_0036879	1..465	3.19	-1.41	-2.67	0.02	0.11	1	3.19	-2.74	-6.69	0.0018	0.01	1		Transposable element Tcb1 transposase [Salmo salar]
contig_0037250	contig_0037250	1..991	1.87	-1.42	-2.67	0.00909	0.07	1	1.87	-3.62	-12.31	0.000473	0.00434	1		Transposable element Tc1 transposase [Salmo salar]
contig_0038387	contig_0038387	1..2665	0.83	-1.42	-2.67	0.00465	0.05	1	0.83	-3.33	-10.02	0.00012	0.00139	1		Transposable element Tcb1 transposase [Salmo salar]
contig_0075624	contig_0075624	1..1022	1.45	-1.41	-2.67	0.02	0.11	1	1.45	-2.03	-4.08	0.00456	0.03	1		PREDICTED: CCR4-NOT transcription complex subunit 2-like [Salmo salar]
contig_0087513	contig_0087513	1..867	2.56	-1.42	-2.67	0.00465	0.05	1	2.56	-2.92	-7.59	0.000132	0.00151	1		PREDICTED: chromobox protein homolog 1-like [Salmo salar]
contig_0090110	contig_0090110	1..1592	0.93	-1.41	-2.67	0.02	0.11	1	0.93	-2.03	-4.08	0.00456	0.03	1		PREDICTED: protein phosphatase 1H-like [Salmo salar]
contig_0136904	contig_0136904	1..1596	0.93	-1.41	-2.67	0.02	0.11	1	0.93	-3.3	-9.86	0.00155	0.01	1		PREDICTED: proteoglycan 4-like isoform X1 [Salmo salar]
contig_0141180	contig_0141180	1..1318	1.69	-1.42	-2.67	0.00465	0.05	1	1.69	-2.92	-7.59	0.000132	0.00151	1		PREDICTED: ankyrin-1-like isoform X1 [Salmo salar]
contig_0156969	contig_0156969	1..1334	1.39	-1.42	-2.67	0.00909	0.07	1	1.39	-4.55	-23.37	0.00116	0.00897	1		PREDICTED: serine--tRNA ligase, mitochondrial isoform X1 [Salmo salar]
contig_0202199	contig_0202199	1..1664	1.11	-1.42	-2.67	0.00909	0.07	1	1.11	-3.06	-8.36	0.000432	0.00404	1		PREDICTED: tax1-binding protein 1 homolog A-like [Salmo salar]
contig_0050145	contig_0050145	1..1419	2.87	-1.42	-2.68	0.000252	0.0053	1	2.87	-2.82	-7.04	4.89e-07	1.18e-05	0.13		not available
contig_0068138	contig_0068138	1..1947	4	-1.42	-2.68	2.64e-07	1.51e-05	0.07	4	-2.24	-4.72	6.31e-11	3.6e-09	1.68e-05		PREDICTED: metastasis suppressor protein 1-like isoform X1 [Salmo salar]
contig_0071522	contig_0071522	1..734	24.16	-1.42	-2.68	2.05e-12	2.81e-10	5.57e-07	24.16	-3.86	-14.51	8.45e-25	3.04e-22	2.25e-19		PREDICTED: TBC1 domain family member 24-like [Salmo salar]
contig_0142006	contig_0142006	1..1191	2.49	-1.42	-2.68	0.00134	0.02	1	2.49	-2.19	-4.56	5.58e-05	0.000728	1		PREDICTED: sphingosine-1-phosphate phosphatase 2-like isoform X1 [Salmo salar]
contig_0077907	contig_0077907	1..1172	3.03	-1.43	-2.7	0.000509	0.00921	1	3.03	-2.62	-6.13	3.43e-06	6.58e-05	0.91		PREDICTED: protein 4.1-like isoform X5 [Salmo salar]
contig_0081573	contig_0081573	1..411	8.63	-1.43	-2.7	0.000509	0.00921	1	8.63	-2.16	-4.48	1.42e-05	0.000227	1		PREDICTED: uncharacterized protein LOC106562497, partial [Salmo salar]
contig_0089367	contig_0089367	1..1979	1.23	-1.43	-2.7	0.003	0.03	1	1.23	-2.07	-4.21	0.000314	0.00311	1		PREDICTED: protein TMEPAI-like isoform X1 [Salmo salar]
contig_0109365	contig_0109365	1..2087	1.17	-1.43	-2.7	0.003	0.03	1	1.17	-2.26	-4.8	0.000188	0.00202	1		PREDICTED: membrane-associated guanylate kinase, WW and PDZ domain-containing protein 3-like isoform X2 [Salmo salar]
contig_0078070	contig_0078070	1..1823	1.13	-1.44	-2.71	0.00575	0.05	1	1.13	-2.5	-5.67	0.000349	0.00339	1		PREDICTED: rap guanine nucleotide exchange factor 3-like isoform X2 [Salmo salar]
contig_0106050	contig_0106050	1..415	4.08	-1.44	-2.71	0.01	0.08	1	4.08	-3.49	-11.26	0.000772	0.00643	1		PREDICTED: E3 ubiquitin-protein ligase RNF213-like isoform X4 [Salmo salar]
contig_0137366	contig_0137366	1..1704	0.99	-1.44	-2.71	0.01	0.08	1	0.99	-2.53	-5.79	0.00108	0.00849	1		PREDICTED: carbonic anhydrase-like [Salmo salar]
contig_0147491	contig_0147491	1..1261	1.64	-1.44	-2.71	0.00575	0.05	1	1.64	-3.22	-9.31	0.000205	0.00217	1		PREDICTED: protein CYR61-like [Salmo salar]
contig_0013853	contig_0013853	1..325	4.07	-1.44	-2.72	0.02	0.13	1	4.07	-2.58	-5.98	0.00351	0.02	1		Hydroxyacid oxidase 2 [Salmo salar]
contig_0028533	contig_0028533	1..1006	40.05	-1.44	-2.72	1.45e-19	4.22e-17	3.94e-14	40.05	-3.44	-10.82	5.04e-48	6.16e-45	1.34e-42		PREDICTED: T-lymphoma invasion and metastasis-inducing protein 1-like isoform X2 [Salmo salar]
contig_0036057	contig_0036057	1..289	4.58	-1.44	-2.72	0.02	0.13	1	4.58	-4.06	-16.72	0.00389	0.02	1		PREDICTED: solute carrier family 52, riboflavin transporter, member 3-A-like [Salmo salar]
contig_0083181	contig_0083181	1..1501	6	-1.44	-2.72	3.61e-08	2.47e-06	0.00982	6	-2.11	-4.33	1.06e-11	6.99e-10	2.83e-06		PREDICTED: fibronectin type III domain-containing protein 3B [Salmo salar]
contig_0089118	contig_0089118	1..1791	0.74	-1.44	-2.72	0.02	0.13	1	0.74	-2.58	-5.98	0.00351	0.02	1		PREDICTED: coiled-coil domain-containing protein 69-like isoform X1 [Salmo salar]
contig_0011003	contig_0011003	1..3224	0.82	-1.45	-2.73	0.00196	0.03	1	0.82	-2.38	-5.22	7.74e-05	0.000958	1		PREDICTED: roquin-1-like isoform X1 [Salmo salar]
contig_0090501	contig_0090501	1..1694	1.56	-1.45	-2.73	0.00196	0.03	1	1.56	-2.03	-4.08	0.000214	0.00226	1		PREDICTED: ephrin type-A receptor 3-like [Salmo salar]
contig_0051990	contig_0051990	1..2396	0.95	-1.45	-2.74	0.00368	0.04	1	0.95	-2.39	-5.23	0.000226	0.00236	1		not available
contig_0092334	contig_0092334	1..2738	0.83	-1.45	-2.74	0.00368	0.04	1	0.83	-2.39	-5.23	0.000226	0.00236	1		PREDICTED: apoptosis-inducing factor 3-like isoform X1 [Salmo salar]
contig_0092887	contig_0092887	1..3768	2.11	-1.45	-2.74	1.42e-07	8.68e-06	0.04	2.11	-2.7	-6.5	2.42e-12	1.79e-10	6.45e-07		PREDICTED: SH3 and PX domain-containing protein 2A-like isoform X1 [Salmo salar]
contig_0026077	contig_0026077	1..1007	2.84	-1.46	-2.75	0.00129	0.02	1	2.84	-2.71	-6.56	2.19e-05	0.000327	1		not available
contig_0069936	contig_0069936	1..1904	1.5	-1.46	-2.75	0.00129	0.02	1	1.5	-3.29	-9.75	1.46e-05	0.000231	1		Transposable element Tcb1 transposase [Salmo salar]
contig_0085669	contig_0085669	1..343	56.33	-1.46	-2.75	1.66e-13	2.59e-11	4.52e-08	56.33	-2.91	-7.49	7.41e-26	2.95e-23	1.97e-20		PREDICTED: uncharacterized protein LOC106603442 isoform X2 [Salmo salar]
contig_0114961	contig_0114961	1..491	5.82	-1.46	-2.75	0.00129	0.02	1	5.82	-3.69	-12.88	1.74e-05	0.000269	1		PREDICTED: UDP-N-acetylglucosamine transporter-like isoform X1 [Salmo salar]
contig_0011461	contig_0011461	1..445	10.71	-1.46	-2.76	7.18e-05	0.00192	1	10.71	-3.23	-9.39	3.89e-08	1.23e-06	0.01		Cytosolic sulfotransferase 3 [Salmo salar]
contig_0013902	contig_0013902	1..593	2.59	-1.46	-2.76	0.01	0.1	1	2.59	-2.39	-5.25	0.00215	0.01	1		PREDICTED: IgGFc-binding protein-like, partial [Salmo salar]
contig_0057246	contig_0057246	1..658	3.78	-1.47	-2.76	0.00238	0.03	1	3.78	-4.05	-16.52	8.41e-05	0.00103	1		PREDICTED: retinoblastoma-like protein 2 isoform X4 [Salmo salar]
contig_0059175	contig_0059175	1..1117	2.23	-1.47	-2.76	0.00238	0.03	1	2.23	-2.3	-4.91	0.00015	0.00168	1		PREDICTED: caspase-6-like, partial [Salmo salar]
contig_0086548	contig_0086548	1..848	1.81	-1.46	-2.76	0.01	0.1	1	1.81	-2.08	-4.22	0.00357	0.02	1		PREDICTED: uncharacterized protein LOC106609103 isoform X4 [Salmo salar]
contig_0119213	contig_0119213	1..1157	1.33	-1.46	-2.76	0.01	0.1	1	1.33	-4.28	-19.38	0.00231	0.02	1		PREDICTED: serine/threonine-protein kinase WNK4 isoform X1 [Salmo salar]
contig_0216516	contig_0216516	1..1917	0.8	-1.46	-2.76	0.01	0.1	1	0.8	-2.39	-5.25	0.00215	0.01	1		not available
contig_0036081	contig_0036081	1..650	46.42	-1.47	-2.77	1.71e-17	4.15e-15	4.66e-12	46.42	-3.86	-14.51	1.27e-38	1.13e-35	3.38e-33		not available
contig_0063964	contig_0063964	1..2013	3.23	-1.47	-2.77	1.06e-06	5.18e-05	0.29	3.23	-3.04	-8.21	7.17e-11	4.03e-09	1.91e-05		PREDICTED: E3 ubiquitin-protein ligase RNF213-like isoform X2 [Salmo salar]
contig_0027238	contig_0027238	1..2085	1.29	-1.48	-2.78	0.00156	0.02	1	1.29	-2.41	-5.33	6.23e-05	0.0008	1		PREDICTED: cytochrome c oxidase subunit 6A1, mitochondrial-like [Salmo salar]
contig_0038404	contig_0038404	1..1947	3.45	-1.48	-2.78	7.16e-07	3.68e-05	0.19	3.45	-2.46	-5.5	2.42e-10	1.22e-08	6.45e-05		PREDICTED: calcium homeostasis endoplasmic reticulum protein isoform X3 [Salmo salar]
contig_0060665	contig_0060665	1..1250	1.69	-1.47	-2.78	0.00453	0.05	1	1.69	-2.28	-4.86	0.000444	0.00413	1		PREDICTED: helicase with zinc finger domain 2-like [Salmo salar]
contig_0075981	contig_0075981	1..315	8.57	-1.48	-2.78	0.00156	0.02	1	8.57	-3.6	-12.17	2.75e-05	0.000398	1		PREDICTED: interferon-induced very large GTPase 1-like [Salmo salar]
contig_0091790	contig_0091790	1..2066	1.02	-1.47	-2.78	0.00453	0.05	1	1.02	-2.06	-4.18	0.000744	0.00625	1		PREDICTED: potassium voltage-gated channel subfamily KQT member 4-like [Salmo salar]
contig_0121312	contig_0121312	1..2166	0.54	-1.48	-2.78	0.03	0.16	1	0.54	-2.4	-5.27	0.00709	0.04	1		Retinoblastoma-associated protein [Salmo salar]
contig_0122463	contig_0122463	1..2029	1.33	-1.48	-2.78	0.00156	0.02	1	1.33	-2.89	-7.41	2.91e-05	0.000417	1		not available
contig_0138917	contig_0138917	1..1262	0.92	-1.48	-2.78	0.03	0.16	1	0.92	-2.96	-7.76	0.005	0.03	1		PREDICTED: voltage-dependent calcium channel subunit alpha-2/delta-3-like, partial [Salmo salar]
contig_0152924	contig_0152924	1..952	1.22	-1.48	-2.78	0.03	0.16	1	1.22	-2.4	-5.27	0.00709	0.04	1		PREDICTED: protein FAM46A-like [Salmo salar]
contig_0158144	contig_0158144	1..1498	0.78	-1.48	-2.78	0.03	0.16	1	0.78	-2.4	-5.27	0.00709	0.04	1		PREDICTED: protocadherin-10-like isoform X3 [Salmo salar]
contig_0061264	contig_0061264	1..1306	1.78	-1.49	-2.8	0.00291	0.03	1	1.78	-3.39	-10.5	8.52e-05	0.00104	1		PREDICTED: methyl-CpG-binding protein 2-like isoform X2 [Salmo salar]
contig_0130067	contig_0130067	1..577	4.04	-1.49	-2.8	0.00291	0.03	1	4.04	-2.01	-4.03	0.000498	0.00451	1		PREDICTED: uncharacterized protein LOC106593226, partial [Salmo salar]
contig_0022773	contig_0022773	1..2042	3.24	-1.49	-2.82	6.89e-07	3.56e-05	0.19	3.24	-2.2	-4.61	1.52e-09	6.56e-08	0.000405		PREDICTED: insulin-like growth factor 2 mRNA-binding protein 1 isoform X1 [Salmo salar]
[truncated: 399 more rows]

## Sheet: Int GSC
Name	Chromosome	Region	Max group mean	Log₂ fold change	Fold change	P-value	FDR p-value	Bonferroni	Max group mean	Log₂ fold change	Fold change	P-value	FDR p-value	Bonferroni		Description
[truncated: 4,044 more rows]

[truncated: 3 more sheets: Int SS, Hk GSC, Hk SS]
