# Supplementary material for: Whole-Genome Transcript Expression Profiling Reveals Novel Insights into Transposon Genes and Non-Coding RNAs during Atlantic Salmon Seawater Adaptation
Source: Biology (Basel). 2021 Dec 21;11(1):1. doi: 10.3390/biology11010001 (PMC8772943; doi:10.3390/biology11010001)
Supplement: Supplementary file 1 [file biology-11-00001-s001.zip › Table S3_miRNA prediction.xlsx]

## Sheet: Gills
miRNA	contig	target site	delta G	Target escription
ssa-miR-150-3p	contig_14730	target from/to=[2128,2150]	-38.20	PREDICTED: phosphofurin acidic cluster sorting protein 2-like [Salmo salar]
ssa-miR-150-3p	contig_16762	target from/to=[280,301]	-36.80	SPATA5 [Salmo salar]
ssa-miR-19d-5p	contig_48455	target from/to=[683,708]	-36.70	collagen Type XI Alpha2 [Salmo salar]
ssa-miR-150-3p	contig_42247	target from/to=[2126,2146]	-36.30	PREDICTED: protein FAM83H-like isoform X2 [Salmo salar]
ssa-miR-150-3p	contig_43846	target from/to=[44,64]	-35.90	PREDICTED: nucleotide-binding oligomerization domain-containing protein 2 isoform X2 [Salmo salar]
ssa-miR-150-3p	contig_3416	target from/to=[345,367]	-35.40	PREDICTED: SWI/SNF complex subunit SMARCC2-like isoform X3 [Salmo salar]
ssa-miR-19d-5p	contig_30733	target from/to=[174,197]	-34.50	PREDICTED: collagen alpha-1(VI) chain-like [Salmo salar]
ssa-miR-150-3p	contig_71025	target from/to=[553,574]	-34.20	PREDICTED: uncharacterized protein LOC106606035 isoform X1 [Salmo salar]
ssa-miR-150-3p	contig_21107	target from/to=[3940,3961]	-34.10	PREDICTED: rab effector MyRIP-like isoform X1 [Salmo salar]
ssa-miR-150-3p	contig_11191	target from/to=[1,24]	-33.80	PREDICTED: aftiphilin-like isoform X1 [Salmo salar]
ssa-miR-456-5p	contig_25257	target from/to=[1590,1609]	-33.60	PREDICTED: evolutionarily conserved signaling intermediate in Toll pathway, mitochondrial [Salmo salar]
ssa-miR-150-3p	contig_19143	target from/to=[294,313]	-33.40	PREDICTED: homeobox protein cut-like 1 isoform X6 [Salmo salar]
ssa-miR-150-3p	contig_35324	target from/to=[239,263]	-33.30	PREDICTED: lariat debranching enzyme isoform X1 [Salmo salar]
ssa-miR-150-3p	contig_45875	target from/to=[1999,2020]	-33.30	PREDICTED: uncharacterized protein LOC106600457 [Salmo salar]
ssa-miR-150-3p	contig_56652	target from/to=[4329,4352]	-33.30	PREDICTED: uncharacterized protein LOC106591608 isoform X3 [Salmo salar]
ssa-miR-150-3p	contig_82576	target from/to=[561,582]	-33.20	PREDICTED: DNA repair protein RAD52 homolog [Salmo salar]
ssa-miR-92b-3p	contig_91907	target from/to=[957,979]	-32.70	PREDICTED: protein FAM110B-like [Salmo salar]
ssa-miR-150-3p	contig_31764	target from/to=[4005,4026]	-32.50	PREDICTED: rho guanine nucleotide exchange factor 25-like isoform X1 [Salmo salar]
ssa-miR-150-3p	contig_59959	target from/to=[709,729]	-32.50	Transposable element Tcb1 transposase [Salmo salar]
ssa-miR-19d-5p	contig_40076	target from/to=[659,685]	-32.50	PREDICTED: ras-like protein family member 12 isoform X2 [Salmo salar]
ssa-miR-19d-5p	contig_67231	target from/to=[347,372]	-32.50	PREDICTED: uncharacterized protein LOC106597293 [Salmo salar]
ssa-miR-150-3p	contig_29140	target from/to=[905,927]	-32.30	PREDICTED: transcription factor E3-like [Salmo salar]
ssa-miR-150-3p	contig_19255	target from/to=[733,756]	-32.20	PREDICTED: fibronectin type-III domain-containing protein 3A-like, partial [Salmo salar]
ssa-miR-19d-5p	contig_60381	target from/to=[3814,3839]	-32.20	PREDICTED: protein EURL homolog [Salmo salar]
ssa-miR-19d-5p	contig_67262	target from/to=[417,441]	-32.10	COL11A2, partial [Salmo salar]
ssa-miR-150-3p	contig_97855	target from/to=[24,46]	-32.00	PREDICTED: monocarboxylate transporter 13-like isoform X1 [Salmo salar]
ssa-miR-138-5p	contig_15573	target from/to=[56,80]	-31.90	PREDICTED: FERM, RhoGEF and pleckstrin domain-containing protein 1-like, partial [Salmo salar]
ssa-miR-19c-3-5p	contig_34777	target from/to=[800,821]	-31.90	PREDICTED: neurochondrin [Salmo salar]
ssa-miR-19d-5p	contig_16762	target from/to=[1310,1335]	-31.80	SPATA5 [Salmo salar]
ssa-miR-150-3p	contig_90755	target from/to=[616,638]	-31.80	PREDICTED: uncharacterized protein LOC106613459 [Salmo salar]
ssa-miR-133a-3p	contig_21107	target from/to=[3963,3985]	-31.60	PREDICTED: rab effector MyRIP-like isoform X1 [Salmo salar]
ssa-miR-150-3p	contig_36955	target from/to=[65,86]	-31.60	PREDICTED: xaa-Pro aminopeptidase 3 isoform X3 [Salmo salar]
ssa-miR-150-3p	contig_45740	target from/to=[770,791]	-31.50	not available
ssa-miR-150-3p	contig_60983	target from/to=[2459,2480]	-31.50	Deoxyribonuclease gamma precursor [Salmo salar]
ssa-miR-150-3p	contig_77939	target from/to=[122,144]	-31.50	PREDICTED: neuronal acetylcholine receptor subunit alpha-2-like [Salmo salar]
ssa-miR-150-3p	contig_236	target from/to=[752,774]	-31.40	PREDICTED: proteasome subunit beta type-5-like [Salmo salar]
ssa-miR-19d-5p	contig_4282	target from/to=[484,508]	-31.40	PREDICTED: tetratricopeptide repeat protein 7A-like isoform X2 [Salmo salar]
ssa-miR-150-3p	contig_20646	target from/to=[415,436]	-31.40	PREDICTED: stonustoxin subunit beta-like [Salmo salar]
ssa-miR-150-3p	contig_16381	target from/to=[725,747]	-31.20	Lipolysis-stimulated lipoprotein receptor precursor [Salmo salar]
ssa-miR-150-3p	contig_51133	target from/to=[3130,3152]	-31.10	PREDICTED: G-protein coupled receptor 126-like isoform X3 [Salmo salar]
ssa-miR-150-3p	contig_35187	target from/to=[4517,4537]	-31.10	PREDICTED: A disintegrin and metalloproteinase with thrombospondin motifs 15-like [Salmo salar]
ssa-miR-125b-1-3p	contig_62529	target from/to=[3050,3070]	-31.00	PREDICTED: microtubule-associated protein 2-like isoform X10 [Salmo salar]
ssa-miR-150-3p	contig_90472	target from/to=[184,203]	-31.00	PREDICTED: serum amyloid P-component-like [Salmo salar]
ssa-miR-19d-5p	contig_14518	target from/to=[811,834]	-30.90	transposase [Salmo salar]
ssa-miR-150-3p	contig_37246	target from/to=[363,383]	-30.90	PREDICTED: leucine-rich repeat and calponin homology domain-containing protein 2-like isoform X3 [Salmo salar]
ssa-miR-365-5p	contig_41132	target from/to=[3417,3436]	-30.70	PREDICTED: probable G-protein coupled receptor 52 [Salmo salar]
ssa-miR-19d-5p	contig_19255	target from/to=[1307,1329]	-30.70	PREDICTED: fibronectin type-III domain-containing protein 3A-like, partial [Salmo salar]
ssa-miR-19d-5p	contig_23803	target from/to=[1648,1670]	-30.70	PREDICTED: piggyBac transposable element-derived protein 4-like [Salmo salar]
ssa-miR-19d-5p	contig_71025	target from/to=[1188,1211]	-30.70	PREDICTED: uncharacterized protein LOC106606035 isoform X1 [Salmo salar]
ssa-miR-30a-3p	contig_86737	target from/to=[18,37]	-30.70	PREDICTED: UDP-N-acetylglucosamine transporter-like isoform X3 [Salmo salar]
ssa-miR-150-3p	contig_55211	target from/to=[842,863]	-30.60	PREDICTED: nascent polypeptide-associated complex subunit alpha, muscle-specific form-like [Salmo salar]
ssa-miR-150-3p	contig_91964	target from/to=[1484,1503]	-30.60	not available
ssa-miR-133b-3p	contig_21107	target from/to=[3965,3986]	-30.50	PREDICTED: rab effector MyRIP-like isoform X1 [Salmo salar]
ssa-miR-150-3p	contig_13623	target from/to=[776,797]	-30.40	PREDICTED: UDP-N-acetylglucosamine transporter-like isoform X3 [Salmo salar]
ssa-miR-92b-3p	contig_61832	target from/to=[281,303]	-30.40	PREDICTED: clathrin heavy chain 1-like isoform X4 [Salmo salar]
ssa-miR-150-3p	contig_81252	target from/to=[3500,3525]	-30.40	PREDICTED: proprotein convertase subtilisin/kexin type 5-like isoform X1 [Salmo salar]
ssa-miR-19d-5p	contig_91964	target from/to=[2195,2219]	-30.40	not available
ssa-miR-375-5p	contig_105445	target from/to=[480,501]	-30.40	PREDICTED: uncharacterized protein LOC106614011 [Salmo salar]
ssa-miR-19d-5p	contig_15096	target from/to=[3767,3791]	-30.30	PREDICTED: basement membrane-specific heparan sulfate proteoglycan core protein-like isoform X18 [Salmo salar]
ssa-miR-150-3p	contig_39812	target from/to=[511,534]	-30.30	PREDICTED: uncharacterized protein LOC106604990, partial [Salmo salar]
ssa-miR-222b-5p	contig_79205	target from/to=[3596,3617]	-30.30	PREDICTED: uncharacterized protein LOC106563789 [Salmo salar]
ssa-miR-19d-5p	contig_35324	target from/to=[1172,1194]	-30.20	PREDICTED: lariat debranching enzyme isoform X1 [Salmo salar]
ssa-miR-150-3p	contig_61161	target from/to=[463,484]	-30.20	PREDICTED: telomere length regulation protein TEL2 homolog isoform X2 [Salmo salar]
ssa-miR-150-3p	contig_61487	target from/to=[1630,1650]	-30.10	PREDICTED: proenkephalin-A-like [Salmo salar]
ssa-miR-150-3p	contig_20114	target from/to=[1539,1564]	-30.00	PREDICTED: solute carrier family 35 member F6-like isoform X1 [Salmo salar]
ssa-miR-150-3p	contig_6182	target from/to=[843,864]	-29.90	ATP synthase subunit alpha, mitochondrial precursor [Salmo salar]
ssa-miR-150-3p	contig_8072	target from/to=[2017,2039]	-29.90	Stromal cell-derived factor 2-like protein 1 precursor [Salmo salar]
ssa-miR-19d-5p	contig_19563	target from/to=[753,772]	-29.90	PREDICTED: membrane-spanning 4-domains subfamily A member 4D-like [Salmo salar]
ssa-miR-2188-3p	contig_24774	target from/to=[709,731]	-29.90	PREDICTED: ribonuclease H2 subunit B isoform X2 [Salmo salar]
ssa-miR-150-3p	contig_30492	target from/to=[1559,1582]	-29.90	PREDICTED: uncharacterized protein LOC106567525 isoform X1 [Salmo salar]
ssa-miR-30a-3p	contig_85289	target from/to=[130,153]	-29.90	PREDICTED: caspase recruitment domain-containing protein 8-like [Salmo salar]
ssa-miR-150-3p	contig_22063	target from/to=[904,926]	-29.90	PREDICTED: transmembrane protein 204-like [Salmo salar]
ssa-miR-214-5p	contig_91675	target from/to=[747,768]	-29.80	somatolactin receptor precursor [Salmo salar]
ssa-miR-150-3p	contig_17505	target from/to=[706,727]	-29.80	PREDICTED: diacylglycerol O-acyltransferase 1-like [Salmo salar]
ssa-miR-2188-3p	contig_90754	target from/to=[857,877]	-29.80	PREDICTED: leucine-rich repeat-containing protein 15-like [Salmo salar]
ssa-miR-150-3p	contig_4342	target from/to=[1970,1991]	-29.70	Interleukin-12 receptor beta-2 chain precursor [Salmo salar]
ssa-miR-222b-5p	contig_135503	target from/to=[1248,1267]	-29.70	PREDICTED: collagen alpha-1(VI) chain-like [Salmo salar]
ssa-miR-150-3p	contig_149762	target from/to=[952,972]	-29.70	PREDICTED: probable phospholipid-transporting ATPase IH isoform X2 [Salmo salar]
ssa-miR-138-5p	contig_101535	target from/to=[4325,4346]	-29.60	PREDICTED: stonin-1-like [Salmo salar]
ssa-miR-150-3p	contig_659	target from/to=[3568,3590]	-29.60	PREDICTED: golgin subfamily B member 1-like isoform X3 [Salmo salar]
ssa-miR-150-3p	contig_4515	target from/to=[506,527]	-29.60	60S acidic ribosomal protein P0 [Salmo salar]
ssa-miR-19d-5p	contig_4920	target from/to=[1476,1501]	-29.60	Transposable element Tcb1 transposase [Salmo salar]
ssa-miR-214-5p	contig_77087	target from/to=[2002,2024]	-29.50	PREDICTED: glutenin, high molecular weight subunit DY10-like isoform X1 [Salmo salar]
ssa-miR-8163-5p	contig_43845	target from/to=[1618,1641]	-29.50	PREDICTED: uncharacterized protein LOC106594117 [Salmo salar]
ssa-miR-150-3p	contig_20569	target from/to=[2230,2249]	-29.50	PREDICTED: G-protein-signaling modulator 2-like isoform X1 [Salmo salar]
ssa-miR-19d-5p	contig_29936	target from/to=[2133,2158]	-29.50	PREDICTED: prosaposin receptor GPR37L1-like isoform X1 [Salmo salar]
ssa-miR-150-3p	contig_1693	target from/to=[1363,1386]	-29.40	PREDICTED: uncharacterized protein LOC106600457 [Salmo salar]
ssa-miR-19d-5p	contig_36480	target from/to=[72,93]	-29.40	PREDICTED: probable E3 ubiquitin-protein ligase HERC1, partial [Salmo salar]
ssa-miR-150-3p	contig_44145	target from/to=[2748,2767]	-29.40	PREDICTED: rho GTPase-activating protein 20-like [Salmo salar]
ssa-miR-150-3p	contig_169467	target from/to=[1368,1391]	-29.40	PREDICTED: tripartite motif-containing protein 35-like [Salmo salar]
ssa-miR-150-3p	contig_30135	target from/to=[2801,2822]	-29.40	PREDICTED: platelet-derived growth factor receptor-like protein isoform X1 [Salmo salar]
ssa-miR-8163-5p	contig_54689	target from/to=[247,268]	-29.30	PREDICTED: peroxisome proliferator-activated receptor gamma coactivator 1-beta isoform X1 [Salmo salar]
ssa-miR-150-3p	contig_966	target from/to=[106,128]	-29.30	Cathepsin B precursor [Salmo salar]
ssa-miR-19d-5p	contig_8167	target from/to=[4737,4761]	-29.30	PREDICTED: collagen alpha-4(IV) chain-like isoform X1 [Salmo salar]
ssa-miR-150-3p	contig_52121	target from/to=[106,128]	-29.30	PREDICTED: uncharacterized protein LOC106582079 [Salmo salar]
ssa-miR-30a-3p	contig_72064	target from/to=[25,45]	-29.30	PREDICTED: PERQ amino acid-rich with GYF domain-containing protein 1-like isoform X1 [Salmo salar]
ssa-miR-150-3p	contig_34193	target from/to=[563,585]	-29.30	Transposable element Tc1 transposase [Salmo salar]
ssa-miR-150-3p	contig_15096	target from/to=[6080,6102]	-29.20	PREDICTED: basement membrane-specific heparan sulfate proteoglycan core protein-like isoform X18 [Salmo salar]
ssa-miR-19d-5p	contig_19143	target from/to=[4931,4957]	-29.20	PREDICTED: homeobox protein cut-like 1 isoform X6 [Salmo salar]
ssa-miR-19d-5p	contig_7680	target from/to=[564,589]	-29.20	PREDICTED: collagen alpha-1(XXIII) chain-like isoform X7 [Salmo salar]
ssa-miR-150-3p	contig_117751	target from/to=[395,414]	-29.20	PREDICTED: ethanolamine kinase 1-like [Salmo salar]
ssa-miR-150-3p	contig_45885	target from/to=[905,927]	-29.10	PREDICTED: receptor-type tyrosine-protein phosphatase R [Salmo salar]
ssa-miR-150-3p	contig_33836	target from/to=[1516,1539]	-29.00	not available
ssa-miR-456-5p	contig_13861	target from/to=[77,98]	-28.90	PREDICTED: FYN-binding protein-like [Salmo salar]
ssa-miR-133a-3p	contig_36247	target from/to=[445,466]	-28.90	PREDICTED: rab effector Noc2-like [Salmo salar]
ssa-miR-150-3p	contig_11625	target from/to=[684,704]	-28.90	PREDICTED: uncharacterized protein LOC106600457 [Salmo salar]
ssa-miR-30a-3p	contig_21923	target from/to=[6346,6367]	-28.90	PREDICTED: nck-associated protein 5 isoform X1 [Salmo salar]
ssa-miR-150-3p	contig_54689	target from/to=[243,265]	-28.90	PREDICTED: peroxisome proliferator-activated receptor gamma coactivator 1-beta isoform X1 [Salmo salar]
ssa-miR-150-3p	contig_158638	target from/to=[270,290]	-28.90	PREDICTED: extensin-like [Salmo salar]
ssa-miR-150-3p	contig_118448	target from/to=[1002,1024]	-28.90	PREDICTED: synaptophysin-like protein 1 [Salmo salar]
ssa-miR-150-3p	contig_158027	target from/to=[1095,1116]	-28.90	PREDICTED: brain-derived neurotrophic factor-like isoform X1 [Salmo salar]
ssa-miR-365-5p	contig_54044	target from/to=[126,145]	-28.80	not available
ssa-miR-204-5p	contig_169467	target from/to=[1589,1609]	-28.80	PREDICTED: tripartite motif-containing protein 35-like [Salmo salar]
ssa-miR-150-3p	contig_9557	target from/to=[2223,2245]	-28.80	PREDICTED: septin-5 isoform X2 [Salmo salar]
ssa-miR-19d-5p	contig_16762	target from/to=[16,38]	-28.80	SPATA5 [Salmo salar]
ssa-miR-19d-5p	contig_19255	target from/to=[4021,4043]	-28.80	PREDICTED: fibronectin type-III domain-containing protein 3A-like, partial [Salmo salar]
ssa-miR-30a-3p	contig_60608	target from/to=[225,245]	-28.80	PREDICTED: arf-GAP domain and FG repeat-containing protein 1-like isoform X2 [Salmo salar]
ssa-miR-92b-3p	contig_88838	target from/to=[806,828]	-28.80	PREDICTED: Friend leukemia integration 1 transcription factor-like isoform X8 [Salmo salar]
ssa-miR-150-3p	contig_90851	target from/to=[839,861]	-28.80	PREDICTED: aminomethyltransferase, mitochondrial-like [Salmo salar]
ssa-miR-21b-3p	contig_60474	target from/to=[237,258]	-28.70	PREDICTED: lisH domain and HEAT repeat-containing protein KIAA1468 homolog isoform X2 [Salmo salar]
ssa-miR-150-3p	contig_10358	target from/to=[3863,3881]	-28.70	PREDICTED: protein NDRG2 [Salmo salar]
ssa-miR-150-3p	contig_15422	target from/to=[955,976]	-28.70	collagen Type XI Alpha2 [Salmo salar]
ssa-miR-23b-5p	contig_28734	target from/to=[599,620]	-28.70	PREDICTED: solute carrier family 22 member 13-like isoform X3 [Salmo salar]
ssa-miR-19d-5p	contig_84413	target from/to=[1396,1416]	-28.70	NFAT5a2 [Salmo salar]
ssa-miR-19d-5p	contig_19040	target from/to=[1764,1789]	-28.70	PREDICTED: transmembrane protein 255B-like [Salmo salar]
ssa-miR-19d-5p	contig_19506	target from/to=[3051,3074]	-28.70	PREDICTED: A disintegrin and metalloproteinase with thrombospondin motifs 10-like [Salmo salar]
ssa-miR-2188-3p	contig_38923	target from/to=[1130,1152]	-28.70	PREDICTED: transforming growth factor beta-1-induced transcript 1 protein isoform X2 [Salmo salar]
ssa-miR-19d-5p	contig_107931	target from/to=[2799,2823]	-28.70	PREDICTED: collagen alpha-1(VIII) chain-like [Salmo salar]
ssa-miR-338a-3-5p	contig_150	target from/to=[2686,2710]	-28.60	PREDICTED: interferon-induced guanylate-binding protein 1-like [Salmo salar]
ssa-miR-150-3p	contig_10342	target from/to=[2556,2576]	-28.60	Chloride intracellular channel protein 2 [Salmo salar]
ssa-miR-150-3p	contig_20468	target from/to=[96,121]	-28.60	PREDICTED: rho GTPase-activating protein 17 isoform X3 [Salmo salar]
ssa-miR-150-3p	contig_45885	target from/to=[2487,2508]	-28.60	PREDICTED: receptor-type tyrosine-protein phosphatase R [Salmo salar]
ssa-miR-150-3p	contig_53622	target from/to=[25,47]	-28.60	zinc finger protein 180-like protein isoform X2 [Salmo salar]
ssa-miR-150-3p	contig_70072	target from/to=[257,279]	-28.60	High mobility group-T protein [Salmo salar]
ssa-miR-138-5p	contig_29630	target from/to=[1028,1048]	-28.50	PREDICTED: dual specificity protein phosphatase 2-like [Salmo salar]
ssa-miR-150-3p	contig_966	target from/to=[5359,5383]	-28.50	Cathepsin B precursor [Salmo salar]
ssa-miR-150-3p	contig_20832	target from/to=[3553,3574]	-28.50	PREDICTED: transmembrane protein 56-B-like [Salmo salar]
ssa-miR-19d-5p	contig_36955	target from/to=[181,204]	-28.50	PREDICTED: xaa-Pro aminopeptidase 3 isoform X3 [Salmo salar]
ssa-miR-150-3p	contig_43671	target from/to=[832,854]	-28.50	PREDICTED: prolyl endopeptidase-like [Salmo salar]
ssa-miR-150-3p	contig_44211	target from/to=[2021,2042]	-28.50	PREDICTED: uncharacterized protein LOC106567027 [Salmo salar]
ssa-miR-150-3p	contig_46399	target from/to=[1027,1050]	-28.50	PREDICTED: 4,5-dihydroxyphthalate dehydrogenase isoform X1 [Salmo salar]
ssa-miR-30a-3p	contig_75293	target from/to=[828,850]	-28.50	PREDICTED: CTTNBP2 N-terminal-like protein [Salmo salar]
ssa-miR-21b-5p	contig_8819	target from/to=[1275,1299]	-28.40	PREDICTED: anosmin-1-like [Salmo salar]
ssa-miR-138-5p	contig_101535	target from/to=[4257,4278]	-28.40	PREDICTED: stonin-1-like [Salmo salar]
ssa-miR-19d-5p	contig_7358	target from/to=[1487,1512]	-28.40	PREDICTED: LIM domain and actin-binding protein 1-like isoform X1 [Salmo salar]
ssa-miR-150-3p	contig_13407	target from/to=[1297,1319]	-28.40	PREDICTED: mucin-5AC-like, partial [Salmo salar]
ssa-miR-150-3p	contig_14609	target from/to=[1413,1433]	-28.40	Deoxyribonuclease gamma precursor [Salmo salar]
ssa-miR-23b-5p	contig_16857	target from/to=[4742,4759]	-28.40	PREDICTED: collagen alpha-6(IV) chain-like isoform X3 [Salmo salar]
ssa-miR-150-3p	contig_67898	target from/to=[1,19]	-28.40	PREDICTED: 1-phosphatidylinositol 4,5-bisphosphate phosphodiesterase beta-3-like, partial [Salmo salar]
ssa-miR-150-3p	contig_77837	target from/to=[500,521]	-28.40	transposase [Salmo salar]
ssa-miR-150-3p	contig_79762	target from/to=[2873,2896]	-28.40	PREDICTED: sphingosine-1-phosphate phosphatase 2-like isoform X1 [Salmo salar]
ssa-miR-150-3p	contig_99152	target from/to=[312,333]	-28.40	PREDICTED: dual specificity mitogen-activated protein kinase kinase 7-like isoform X1 [Salmo salar]
ssa-miR-19c-3-5p	contig_75082	target from/to=[469,492]	-28.30	PREDICTED: ras-related protein Rab-9B-like [Salmo salar]
ssa-miR-150-3p	contig_7114	target from/to=[733,756]	-28.30	PREDICTED: uncharacterized protein LOC106600457 [Salmo salar]
ssa-miR-150-3p	contig_7358	target from/to=[1183,1205]	-28.30	PREDICTED: LIM domain and actin-binding protein 1-like isoform X1 [Salmo salar]
ssa-miR-150-3p	contig_51031	target from/to=[394,414]	-28.30	PREDICTED: uncharacterized protein LOC106572873 isoform X3 [Salmo salar]
ssa-miR-150-3p	contig_68639	target from/to=[470,490]	-28.30	PREDICTED: calcium/calmodulin-dependent protein kinase type II subunit beta isoform X29 [Salmo salar]
ssa-miR-2188-3p	contig_109758	target from/to=[375,397]	-28.30	Transposable element Tc1 transposase [Salmo salar]
ssa-miR-150-3p	contig_41216	target from/to=[1428,1449]	-28.30	PREDICTED: serine/threonine-protein kinase D3-like isoform X1 [Salmo salar]
ssa-miR-150-3p	contig_71336	target from/to=[129,150]	-28.30	PREDICTED: uncharacterized protein LOC106588115 [Salmo salar]
ssa-miR-200a-2-5p	contig_68871	target from/to=[667,689]	-28.20	PREDICTED: uncharacterized protein LOC106580245 [Salmo salar]
ssa-miR-19c-3-5p	contig_75293	target from/to=[404,427]	-28.20	PREDICTED: CTTNBP2 N-terminal-like protein [Salmo salar]
ssa-miR-150-3p	contig_22765	target from/to=[2475,2496]	-28.20	transposase [Salmo salar]
ssa-miR-150-3p	contig_22929	target from/to=[24,45]	-28.20	PREDICTED: DNA polymerase epsilon catalytic subunit A [Salmo salar]
ssa-miR-150-3p	contig_45875	target from/to=[1056,1077]	-28.20	PREDICTED: uncharacterized protein LOC106600457 [Salmo salar]
ssa-miR-150-3p	contig_46387	target from/to=[1083,1104]	-28.20	PREDICTED: folliculin-interacting protein 1-like [Salmo salar]
ssa-miR-19d-5p	contig_48851	target from/to=[545,568]	-28.20	PREDICTED: gastrula zinc finger protein XlCGF57.1-like isoform X1 [Salmo salar]
ssa-miR-19d-5p	contig_49605	target from/to=[201,226]	-28.20	PREDICTED: zinc phosphodiesterase ELAC protein 1 [Salmo salar]
ssa-miR-19d-5p	contig_54044	target from/to=[446,470]	-28.20	not available
ssa-miR-150-3p	contig_73216	target from/to=[79,102]	-28.20	PREDICTED: leucine-rich repeat-containing protein 57-like [Salmo salar]
ssa-miR-150-3p	contig_85310	target from/to=[204,222]	-28.20	PREDICTED: mitochondrial coenzyme A transporter SLC25A42-like [Salmo salar]
ssa-miR-150-3p	contig_32801	target from/to=[807,831]	-28.20	PREDICTED: synemin [Salmo salar]
ssa-miR-150-3p	contig_33642	target from/to=[658,680]	-28.20	PREDICTED: dickkopf-related protein 2 [Salmo salar]
ssa-miR-150-3p	contig_55098	target from/to=[1198,1218]	-28.20	PREDICTED: hematopoietic progenitor cell antigen CD34-like isoform X1 [Salmo salar]
ssa-miR-150-3p	contig_12324	target from/to=[895,916]	-28.10	Hydroxyacyl-coenzyme A dehydrogenase, mitochondrial precursor [Salmo salar]
ssa-miR-19d-5p	contig_30051	target from/to=[218,241]	-28.10	PREDICTED: collagen alpha-1(VI) chain-like [Salmo salar]
ssa-miR-150-3p	contig_40221	target from/to=[2406,2427]	-28.10	PREDICTED: dipeptidyl peptidase 3-like [Salmo salar]
ssa-miR-150-3p	contig_42247	target from/to=[1298,1320]	-28.10	PREDICTED: protein FAM83H-like isoform X2 [Salmo salar]
ssa-miR-10a-5p	contig_69319	target from/to=[1654,1674]	-28.00	PREDICTED: uncharacterized aarF domain-containing protein kinase 1 isoform X1 [Salmo salar]
ssa-miR-19d-5p	contig_593	target from/to=[4353,4373]	-28.00	PREDICTED: uncharacterized protein LOC106565227 [Salmo salar]
ssa-miR-19d-5p	contig_29188	target from/to=[1130,1154]	-28.00	PREDICTED: long-chain-fatty-acid--CoA ligase 4-like isoform X1 [Salmo salar]
ssa-miR-150-3p	contig_76091	target from/to=[859,877]	-28.00	PVRL2 [Salmo salar]
ssa-miR-19d-5p	contig_12275	target from/to=[1066,1087]	-28.00	PREDICTED: hyaluronidase-4-like [Salmo salar]
ssa-miR-150-3p	contig_25906	target from/to=[864,883]	-28.00	PREDICTED: vitrin isoform X1 [Salmo salar]
ssa-miR-150-3p	contig_53334	target from/to=[1271,1294]	-28.00	PREDICTED: uncharacterized protein LOC106609046 isoform X4 [Salmo salar]
ssa-miR-204-5p	contig_61322	target from/to=[354,376]	-27.90	PREDICTED: protein-methionine sulfoxide oxidase MICAL2-like isoform X7 [Salmo salar]
ssa-miR-204-5p	contig_20337	target from/to=[5739,5759]	-27.90	PREDICTED: zinc finger CCHC domain-containing protein 24 [Salmo salar]
ssa-miR-150-3p	contig_19143	target from/to=[317,337]	-27.90	PREDICTED: homeobox protein cut-like 1 isoform X6 [Salmo salar]
ssa-miR-150-3p	contig_19406	target from/to=[53,72]	-27.90	PREDICTED: homeodomain-interacting protein kinase 2-like isoform X5 [Salmo salar]
ssa-miR-19d-5p	contig_50605	target from/to=[237,261]	-27.90	not available
ssa-miR-19d-5p	contig_107183	target from/to=[1573,1598]	-27.90	PREDICTED: uncharacterized protein LOC106599233 [Salmo salar]
ssa-miR-150-3p	contig_75688	target from/to=[1803,1824]	-27.90	PREDICTED: uncharacterized protein KIAA0408-like isoform X2 [Salmo salar]
ssa-miR-133b-3p	contig_36247	target from/to=[447,467]	-27.80	PREDICTED: rab effector Noc2-like [Salmo salar]
ssa-miR-338a-3-5p	contig_99216	target from/to=[260,287]	-27.80	not available
ssa-miR-23b-5p	contig_7080	target from/to=[5114,5133]	-27.80	PREDICTED: NUAK family SNF1-like kinase 1 [Salmo salar]
ssa-miR-150-3p	contig_22619	target from/to=[235,257]	-27.80	PREDICTED: phosphatidylinositol 3-kinase regulatory subunit gamma-like isoform X1 [Salmo salar]
ssa-miR-150-3p	contig_49432	target from/to=[120,140]	-27.80	PREDICTED: multidrug resistance-associated protein 5-like [Salmo salar]
ssa-miR-150-3p	contig_92405	target from/to=[1748,1774]	-27.80	PREDICTED: E3 ubiquitin-protein ligase RNF43 [Salmo salar]
ssa-miR-19d-5p	contig_94190	target from/to=[1776,1804]	-27.80	PREDICTED: obscurin-like isoform X1 [Salmo salar]
ssa-miR-150-3p	contig_15517	target from/to=[365,388]	-27.70	ATPase inhibitor, mitochondrial precursor [Salmo salar]
ssa-miR-19d-5p	contig_34777	target from/to=[800,821]	-27.70	PREDICTED: neurochondrin [Salmo salar]
ssa-miR-150-3p	contig_41769	target from/to=[136,155]	-27.70	PREDICTED: uncharacterized protein LOC106601777 [Salmo salar]
ssa-miR-19d-5p	contig_56957	target from/to=[2933,2957]	-27.70	PREDICTED: tensin-3-like [Salmo salar]
ssa-miR-19d-5p	contig_63811	target from/to=[2681,2705]	-27.70	PREDICTED: lysyl oxidase homolog 4-like [Salmo salar]
ssa-miR-19d-5p	contig_63811	target from/to=[2725,2749]	-27.70	PREDICTED: lysyl oxidase homolog 4-like [Salmo salar]
ssa-miR-19d-5p	contig_63811	target from/to=[2747,2771]	-27.70	PREDICTED: lysyl oxidase homolog 4-like [Salmo salar]
ssa-miR-150-3p	contig_4214	target from/to=[1058,1079]	-27.70	PREDICTED: transcription factor AP-4-like isoform X2 [Salmo salar]
ssa-miR-19d-5p	contig_145316	target from/to=[468,491]	-27.70	PREDICTED: retinal Mueller cells isomerohydrolase-like [Salmo salar]
ssa-miR-150-3p	contig_215	target from/to=[385,408]	-27.60	PREDICTED: 60S ribosomal protein L8-like [Salmo salar]
ssa-miR-150-3p	contig_526	target from/to=[192,213]	-27.60	PREDICTED: zinc finger protein 883-like [Salmo salar]
ssa-miR-150-3p	contig_13597	target from/to=[664,685]	-27.60	PREDICTED: sodium- and chloride-dependent GABA transporter 2-like isoform X1 [Salmo salar]
ssa-miR-150-3p	contig_23640	target from/to=[608,631]	-27.60	PREDICTED: zinc finger CCCH domain-containing protein 13-like [Salmo salar]
ssa-miR-30a-3p	contig_25782	target from/to=[8314,8333]	-27.60	PREDICTED: phosphatidylinositol 3-kinase regulatory subunit gamma isoform X1 [Salmo salar]
ssa-miR-150-3p	contig_26399	target from/to=[660,680]	-27.60	PREDICTED: elongation factor G, mitochondrial isoform X1 [Salmo salar]
ssa-miR-150-3p	contig_28380	target from/to=[997,1020]	-27.60	PREDICTED: zinc finger MYND domain-containing protein 11 isoform X4 [Salmo salar]
ssa-miR-150-3p	contig_48880	target from/to=[498,520]	-27.60	Mannose-6-phosphate receptor-binding protein 1 [Salmo salar]
ssa-miR-150-3p	contig_49884	target from/to=[249,269]	-27.60	PREDICTED: uncharacterized protein LOC106594773 [Salmo salar]
ssa-miR-214-5p	contig_12727	target from/to=[1891,1910]	-27.50	PREDICTED: general transcription factor 3C polypeptide 4-like [Salmo salar]
ssa-miR-19d-5p	contig_11668	target from/to=[1616,1641]	-27.50	Ubiquitin-conjugating enzyme E2 R2 [Salmo salar]
ssa-miR-19d-5p	contig_32880	target from/to=[1084,1109]	-27.50	not available
ssa-miR-19d-5p	contig_36955	target from/to=[44,67]	-27.50	PREDICTED: xaa-Pro aminopeptidase 3 isoform X3 [Salmo salar]
ssa-miR-150-3p	contig_126193	target from/to=[61,84]	-27.50	SPATA5 [Salmo salar]
ssa-miR-199a-3p	contig_94039	target from/to=[148,170]	-27.40	not available
ssa-miR-19d-5p	contig_286	target from/to=[130,155]	-27.40	PREDICTED: apolipoprotein Eb-like [Salmo salar]
ssa-miR-30a-3p	contig_593	target from/to=[2232,2254]	-27.40	PREDICTED: uncharacterized protein LOC106565227 [Salmo salar]
ssa-miR-19d-5p	contig_2468	target from/to=[1530,1553]	-27.40	PREDICTED: lon protease homolog, mitochondrial [Salmo salar]
ssa-miR-30a-3p	contig_3783	target from/to=[148,171]	-27.40	PREDICTED: protein NLRC3-like [Salmo salar]
ssa-miR-150-3p	contig_10837	target from/to=[2046,2068]	-27.40	PREDICTED: roquin-1-like isoform X1 [Salmo salar]
ssa-miR-30a-3p	contig_20569	target from/to=[2479,2502]	-27.40	PREDICTED: G-protein-signaling modulator 2-like isoform X1 [Salmo salar]
ssa-miR-150-3p	contig_72099	target from/to=[695,715]	-27.40	PREDICTED: uncharacterized protein LOC106605384, partial [Salmo salar]
ssa-miR-19d-5p	contig_73940	target from/to=[691,714]	-27.40	PREDICTED: TOM1-like protein 2 isoform X1 [Salmo salar]
ssa-miR-19d-5p	contig_92993	target from/to=[133,155]	-27.40	PREDICTED: MAPK/MAK/MRK overlapping kinase-like isoform X1 [Salmo salar]
ssa-miR-138-5p	contig_91907	target from/to=[1049,1069]	-27.30	PREDICTED: protein FAM110B-like [Salmo salar]
ssa-miR-456-5p	contig_10271	target from/to=[490,511]	-27.30	UPF0527 membrane protein [Salmo salar]
ssa-miR-150-3p	contig_41132	target from/to=[2938,2961]	-27.30	PREDICTED: probable G-protein coupled receptor 52 [Salmo salar]
ssa-miR-23b-5p	contig_45701	target from/to=[2026,2046]	-27.30	PREDICTED: phosphatidylinositol 3,4,5-trisphosphate-dependent Rac exchanger 1 protein-like isoform X1 [Salmo salar]
ssa-miR-19d-5p	contig_63688	target from/to=[437,464]	-27.30	PREDICTED: prolyl endopeptidase-like [Salmo salar]
ssa-miR-150-3p	contig_91907	target from/to=[589,608]	-27.30	PREDICTED: protein FAM110B-like [Salmo salar]
ssa-miR-150-3p	contig_57089	target from/to=[655,677]	-27.30	PREDICTED: brefeldin A-inhibited guanine nucleotide-exchange protein 3 isoform X5 [Salmo salar]
ssa-miR-206-3p	contig_60763	target from/to=[1319,1339]	-27.20	Metalloproteinase inhibitor 3 precursor [Salmo salar]
ssa-miR-150-3p	contig_19646	target from/to=[3758,3777]	-27.20	PREDICTED: integrin alpha-3 [Salmo salar]
ssa-miR-150-3p	contig_26207	target from/to=[3769,3792]	-27.20	PREDICTED: collagen alpha-6(IV) chain-like isoform X4 [Salmo salar]
ssa-miR-19d-5p	contig_70560	target from/to=[906,930]	-27.20	PREDICTED: uncharacterized protein LOC106604427 [Salmo salar]
ssa-miR-150-3p	contig_4951	target from/to=[1066,1088]	-27.20	suppressor of cytokine signaling 2a [Salmo salar]
ssa-miR-23b-5p	contig_5064	target from/to=[1339,1360]	-27.20	PREDICTED: matrix metalloproteinase-15-like [Salmo salar]
ssa-miR-150-3p	contig_32199	target from/to=[188,211]	-27.20	Alpha-1,3-fucosyltransferase 11 [Salmo salar]
ssa-miR-150-3p	contig_39154	target from/to=[893,914]	-27.20	PREDICTED: glucocorticoid modulatory element-binding protein 1 isoform X3 [Salmo salar]
ssa-miR-150-3p	contig_41216	target from/to=[1439,1459]	-27.20	PREDICTED: serine/threonine-protein kinase D3-like isoform X1 [Salmo salar]
ssa-miR-150-3p	contig_57089	target from/to=[3518,3538]	-27.20	PREDICTED: brefeldin A-inhibited guanine nucleotide-exchange protein 3 isoform X5 [Salmo salar]
ssa-miR-133a-3p	contig_16636	target from/to=[547,568]	-27.10	PREDICTED: zinc finger protein 2 homolog [Salmo salar]
ssa-miR-206-3p	contig_103290	target from/to=[398,419]	-27.10	not available
ssa-miR-133a-3p	contig_111485	target from/to=[56,78]	-27.10	PREDICTED: pumilio homolog 1-like [Salmo salar]
ssa-miR-19d-5p	contig_1460	target from/to=[288,311]	-27.10	olfactory receptor family C subfamily 4 member 9 [Salmo salar]
ssa-miR-150-3p	contig_10278	target from/to=[2217,2241]	-27.10	PREDICTED: carnitine O-palmitoyltransferase 2, mitochondrial [Salmo salar]
ssa-miR-150-3p	contig_13860	target from/to=[1135,1158]	-27.10	PREDICTED: nuclear receptor subfamily 1 group D member 2 [Salmo salar]
ssa-miR-23b-5p	contig_13966	target from/to=[819,838]	-27.10	collagen Type XI Alpha2 [Salmo salar]
ssa-miR-150-3p	contig_19871	target from/to=[1805,1826]	-27.10	PREDICTED: cell division cycle-associated protein 3-like [Salmo salar]
ssa-miR-30a-3p	contig_37743	target from/to=[406,428]	-27.10	PREDICTED: uncharacterized protein LOC106569078 [Salmo salar]
ssa-miR-150-3p	contig_49007	target from/to=[2456,2476]	-27.10	Deoxyribonuclease gamma precursor [Salmo salar]
ssa-miR-30a-3p	contig_54689	target from/to=[146,170]	-27.10	PREDICTED: peroxisome proliferator-activated receptor gamma coactivator 1-beta isoform X1 [Salmo salar]
ssa-miR-92b-3p	contig_62592	target from/to=[636,659]	-27.10	PREDICTED: protein LDOC1L-like [Salmo salar]
ssa-miR-19d-5p	contig_81252	target from/to=[2736,2757]	-27.10	PREDICTED: proprotein convertase subtilisin/kexin type 5-like isoform X1 [Salmo salar]
ssa-miR-204-5p	contig_24737	target from/to=[2275,2298]	-27.00	Cytochrome P450 7A1 [Salmo salar]
ssa-miR-365-5p	contig_30505	target from/to=[805,822]	-27.00	PREDICTED: uncharacterized protein LOC106605384, partial [Salmo salar]
ssa-miR-133a-5p	contig_41132	target from/to=[4358,4378]	-27.00	PREDICTED: probable G-protein coupled receptor 52 [Salmo salar]
ssa-miR-19d-5p	contig_1228	target from/to=[446,468]	-27.00	Heat shock cognate 70 kDa protein [Salmo salar]
ssa-miR-150-3p	contig_8120	target from/to=[688,709]	-27.00	transposase [Salmo salar]
ssa-miR-150-3p	contig_13407	target from/to=[1305,1324]	-27.00	PREDICTED: mucin-5AC-like, partial [Salmo salar]
ssa-miR-19d-5p	contig_27008	target from/to=[2266,2289]	-27.00	PREDICTED: uncharacterized protein LOC106594773 [Salmo salar]
ssa-miR-150-3p	contig_27194	target from/to=[1053,1074]	-27.00	collagen Type XI Alpha2 [Salmo salar]
ssa-miR-150-3p	contig_36480	target from/to=[1899,1920]	-27.00	PREDICTED: probable E3 ubiquitin-protein ligase HERC1, partial [Salmo salar]
ssa-miR-150-3p	contig_75293	target from/to=[1573,1593]	-27.00	PREDICTED: CTTNBP2 N-terminal-like protein [Salmo salar]
ssa-miR-150-3p	contig_110314	target from/to=[1786,1806]	-27.00	Very long-chain acyl-CoA synthetase [Salmo salar]
ssa-miR-133a-3p	contig_107931	target from/to=[1620,1641]	-26.90	PREDICTED: collagen alpha-1(VIII) chain-like [Salmo salar]
ssa-miR-365-5p	contig_108407	target from/to=[144,163]	-26.90	PREDICTED: bromodomain-containing protein 1-like, partial [Salmo salar]
ssa-miR-19d-5p	contig_26265	target from/to=[1335,1358]	-26.90	Deoxyribonuclease gamma precursor [Salmo salar]
ssa-miR-150-3p	contig_77087	target from/to=[1971,1994]	-26.90	PREDICTED: glutenin, high molecular weight subunit DY10-like isoform X1 [Salmo salar]
ssa-miR-19d-5p	contig_122361	target from/to=[1896,1923]	-26.90	PREDICTED: ataxin-1-like, partial [Salmo salar]
ssa-miR-19d-5p	contig_71549	target from/to=[1058,1083]	-26.90	PREDICTED: uncharacterized protein LOC106591608 isoform X3 [Salmo salar]
ssa-miR-214-5p	contig_56957	target from/to=[3306,3329]	-26.80	PREDICTED: tensin-3-like [Salmo salar]
ssa-miR-138-5p	contig_68265	target from/to=[105,127]	-26.80	SPATA5 [Salmo salar]
ssa-miR-365-5p	contig_90755	target from/to=[510,528]	-26.80	PREDICTED: uncharacterized protein LOC106613459 [Salmo salar]
ssa-miR-19d-5p	contig_13064	target from/to=[1039,1063]	-26.80	ATP-binding cassette sub-family F member 2 [Salmo salar]
ssa-miR-150-3p	contig_15573	target from/to=[1884,1907]	-26.80	PREDICTED: FERM, RhoGEF and pleckstrin domain-containing protein 1-like, partial [Salmo salar]
ssa-miR-150-3p	contig_41486	target from/to=[2460,2480]	-26.80	PREDICTED: F-box only protein 30-like [Salmo salar]
ssa-miR-150-3p	contig_45698	target from/to=[514,537]	-26.80	PREDICTED: uncharacterized protein LOC106600457 [Salmo salar]
ssa-miR-150-3p	contig_88098	target from/to=[1473,1496]	-26.80	PREDICTED: neurabin-1-like isoform X5 [Salmo salar]
ssa-miR-19d-5p	contig_107385	target from/to=[440,465]	-26.80	PREDICTED: centrosomal protein POC5-like isoform X2 [Salmo salar]
ssa-miR-150-3p	contig_669	target from/to=[1420,1443]	-26.80	PREDICTED: keratin, type II cytoskeletal cochleal-like [Salmo salar]
ssa-miR-456-5p	contig_21527	target from/to=[1449,1468]	-26.70	PREDICTED: zinc finger protein 281-like, partial [Salmo salar]
ssa-miR-19c-3-5p	contig_22040	target from/to=[1854,1880]	-26.70	PREDICTED: ATPase family AAA domain-containing protein 3 isoform X1 [Salmo salar]
ssa-miR-29b-1-5p	contig_56251	target from/to=[1612,1634]	-26.70	Lipoma HMGIC fusion partner-like 4 protein [Salmo salar]
ssa-miR-138-5p	contig_12275	target from/to=[1455,1478]	-26.70	PREDICTED: hyaluronidase-4-like [Salmo salar]
ssa-miR-10b-5p	contig_31076	target from/to=[1000,1022]	-26.70	PREDICTED: EMILIN-3 [Salmo salar]
ssa-miR-150-3p	contig_3829	target from/to=[506,527]	-26.70	60S acidic ribosomal protein P0 [Salmo salar]
ssa-miR-19d-5p	contig_8750	target from/to=[1372,1397]	-26.70	PREDICTED: pikachurin-like [Salmo salar]
ssa-miR-150-3p	contig_9090	target from/to=[52,73]	-26.70	Transposable element Tcb1 transposase [Salmo salar]
ssa-miR-30a-3p	contig_10791	target from/to=[792,813]	-26.70	PREDICTED: uncharacterized protein LOC106600457 [Salmo salar]
ssa-miR-30a-3p	contig_14259	target from/to=[872,894]	-26.70	PREDICTED: peroxisomal acyl-coenzyme A oxidase 1 isoform X1 [Salmo salar]
ssa-miR-150-3p	contig_23784	target from/to=[1494,1514]	-26.70	PREDICTED: zinc transporter ZIP3-like [Salmo salar]
ssa-miR-150-3p	contig_39884	target from/to=[1639,1662]	-26.70	PREDICTED: protein Shroom3-like isoform X1 [Salmo salar]
ssa-miR-30a-3p	contig_44207	target from/to=[627,650]	-26.70	PREDICTED: probable helicase senataxin isoform X2 [Salmo salar]
ssa-miR-150-3p	contig_49127	target from/to=[329,349]	-26.70	PREDICTED: FERM domain-containing protein 4A-like isoform X6 [Salmo salar]
ssa-miR-23b-5p	contig_86166	target from/to=[1068,1087]	-26.70	PREDICTED: roquin-1-like isoform X1 [Salmo salar]
ssa-miR-19d-5p	contig_5631	target from/to=[622,646]	-26.70	PREDICTED: troponin T, fast skeletal muscle isoforms-like, partial [Salmo salar]
ssa-miR-150-3p	contig_51283	target from/to=[2329,2350]	-26.70	Antileukoproteinase precursor [Salmo salar]
ssa-miR-204-5p	contig_10837	target from/to=[1810,1830]	-26.60	PREDICTED: roquin-1-like isoform X1 [Salmo salar]
ssa-miR-200a-2-5p	contig_61473	target from/to=[1311,1332]	-26.60	PREDICTED: ryanodine receptor 3-like isoform X4 [Salmo salar]
ssa-miR-133a-3p	contig_118610	target from/to=[228,249]	-26.60	not available
ssa-miR-338a-3-5p	contig_52075	target from/to=[1261,1284]	-26.60	interleukin-17A/F3 [Salmo salar]
ssa-miR-19d-5p	contig_4920	target from/to=[1891,1915]	-26.60	Transposable element Tcb1 transposase [Salmo salar]
ssa-miR-150-3p	contig_10837	target from/to=[2925,2947]	-26.60	PREDICTED: roquin-1-like isoform X1 [Salmo salar]
ssa-miR-150-3p	contig_21107	target from/to=[3891,3914]	-26.60	PREDICTED: rab effector MyRIP-like isoform X1 [Salmo salar]
ssa-miR-150-3p	contig_33006	target from/to=[3887,3908]	-26.60	PREDICTED: SH3 domain and tetratricopeptide repeat-containing protein 1-like [Salmo salar]
ssa-miR-150-3p	contig_41233	target from/to=[2620,2641]	-26.60	PREDICTED: neuropathy target esterase-like isoform X3 [Salmo salar]
ssa-miR-150-3p	contig_46826	target from/to=[775,796]	-26.60	PREDICTED: adhesion G-protein coupled receptor F2-like [Salmo salar]
ssa-miR-19d-5p	contig_47033	target from/to=[1390,1411]	-26.60	PREDICTED: tudor and KH domain-containing protein isoform X2 [Salmo salar]
ssa-miR-150-3p	contig_51721	target from/to=[349,368]	-26.60	not available
ssa-miR-150-3p	contig_79762	target from/to=[2886,2906]	-26.60	PREDICTED: sphingosine-1-phosphate phosphatase 2-like isoform X1 [Salmo salar]
ssa-miR-222b-5p	contig_35187	target from/to=[5731,5751]	-26.60	PREDICTED: A disintegrin and metalloproteinase with thrombospondin motifs 15-like [Salmo salar]
ssa-miR-19d-5p	contig_39126	target from/to=[8,31]	-26.60	PREDICTED: collagen alpha-2(VI) chain-like isoform X1 [Salmo salar]
ssa-miR-150-3p	contig_71421	target from/to=[354,377]	-26.60	PREDICTED: nucleoporin NUP188 homolog [Salmo salar]
ssa-miR-338a-3-5p	contig_99503	target from/to=[46,69]	-26.50	Zinc finger CCHC domain-containing protein 10 [Salmo salar]
ssa-miR-204-5p	contig_43877	target from/to=[3042,3063]	-26.50	PREDICTED: M-protein, striated muscle-like isoform X1 [Salmo salar]
ssa-miR-150-3p	contig_659	target from/to=[779,801]	-26.50	PREDICTED: golgin subfamily B member 1-like isoform X3 [Salmo salar]
ssa-miR-150-3p	contig_5076	target from/to=[282,305]	-26.50	not available
ssa-miR-23b-5p	contig_10278	target from/to=[2229,2247]	-26.50	PREDICTED: carnitine O-palmitoyltransferase 2, mitochondrial [Salmo salar]
ssa-miR-150-3p	contig_21912	target from/to=[1776,1798]	-26.50	PREDICTED: zinc finger and SCAN domain-containing protein 2-like [Salmo salar]
ssa-miR-150-3p	contig_22704	target from/to=[989,1010]	-26.50	PREDICTED: CAAX prenyl protease 2-like [Salmo salar]
ssa-miR-150-3p	contig_37167	target from/to=[1307,1326]	-26.50	Deoxyribonuclease gamma precursor [Salmo salar]
ssa-miR-19d-5p	contig_48851	target from/to=[1078,1102]	-26.50	PREDICTED: gastrula zinc finger protein XlCGF57.1-like isoform X1 [Salmo salar]
ssa-miR-150-3p	contig_59471	target from/to=[128,154]	-26.50	PREDICTED: zinc finger protein 652-like [Salmo salar]
ssa-miR-19d-5p	contig_73887	target from/to=[976,998]	-26.50	PREDICTED: NAD-dependent protein lipoamidase sirtuin-4, mitochondrial isoform X1 [Salmo salar]
ssa-miR-375-5p	contig_84240	target from/to=[1891,1912]	-26.50	Transmembrane and TPR repeat-containing protein 4 [Salmo salar]
ssa-miR-150-3p	contig_126193	target from/to=[428,450]	-26.50	SPATA5 [Salmo salar]
ssa-miR-150-3p	contig_60825	target from/to=[2002,2021]	-26.50	PREDICTED: EMILIN-1-like isoform X1 [Salmo salar]
ssa-miR-150-3p	contig_71336	target from/to=[61,82]	-26.50	PREDICTED: uncharacterized protein LOC106588115 [Salmo salar]
ssa-miR-150-3p	contig_72310	target from/to=[413,432]	-26.50	PREDICTED: tau-tubulin kinase 2-like isoform X1 [Salmo salar]
ssa-miR-19d-5p	contig_103484	target from/to=[3008,3033]	-26.50	PREDICTED: neurabin-1 isoform X5 [Salmo salar]
ssa-miR-456-5p	contig_10342	target from/to=[2616,2635]	-26.40	Chloride intracellular channel protein 2 [Salmo salar]
ssa-miR-199a-5p	contig_17969	target from/to=[1079,1102]	-26.40	PREDICTED: cytoplasmic phosphatidylinositol transfer protein 1-like isoform X2 [Salmo salar]
ssa-miR-138-5p	contig_19143	target from/to=[752,778]	-26.40	PREDICTED: homeobox protein cut-like 1 isoform X6 [Salmo salar]
ssa-miR-214-5p	contig_27700	target from/to=[19,41]	-26.40	PREDICTED: ataxin-2-like isoform X12 [Salmo salar]
ssa-miR-133a-3p	contig_29439	target from/to=[1821,1842]	-26.40	PREDICTED: stAR-related lipid transfer protein 13-like isoform X1 [Salmo salar]
ssa-miR-214-5p	contig_39006	target from/to=[2909,2930]	-26.40	PREDICTED: uncharacterized protein LOC106568591 [Salmo salar]
ssa-miR-138-5p	contig_48880	target from/to=[1440,1462]	-26.40	Mannose-6-phosphate receptor-binding protein 1 [Salmo salar]
ssa-miR-150-3p	contig_8118	target from/to=[490,510]	-26.40	PREDICTED: NADPH oxidase activator 1 [Salmo salar]
ssa-miR-19d-5p	contig_10742	target from/to=[735,758]	-26.40	PREDICTED: ligand of Numb protein X 2 isoform X2 [Salmo salar]
ssa-miR-19d-5p	contig_14749	target from/to=[143,167]	-26.40	PREDICTED: uncharacterized protein LOC106600457 [Salmo salar]
ssa-miR-150-3p	contig_16429	target from/to=[222,243]	-26.40	Glyceraldehyde-3-phosphate dehydrogenase [Salmo salar]
ssa-miR-150-3p	contig_41486	target from/to=[472,493]	-26.40	PREDICTED: F-box only protein 30-like [Salmo salar]
ssa-miR-150-3p	contig_43271	target from/to=[1788,1812]	-26.40	PREDICTED: leucine-rich repeat flightless-interacting protein 1-like isoform X3 [Salmo salar]
ssa-miR-30a-3p	contig_44891	target from/to=[308,328]	-26.40	PREDICTED: vegetative cell wall protein gp1-like [Salmo salar]
ssa-miR-375-5p	contig_85754	target from/to=[1923,1944]	-26.40	PREDICTED: glucagon receptor-like [Salmo salar]
ssa-miR-150-3p	contig_90163	target from/to=[1118,1140]	-26.40	PREDICTED: nuclease EXOG, mitochondrial [Salmo salar]
ssa-miR-150-3p	contig_104500	target from/to=[132,155]	-26.40	not available
ssa-miR-150-3p	contig_98614	target from/to=[320,339]	-26.40	PREDICTED: laminin subunit alpha-2 [Salmo salar]
ssa-miR-138-5p	contig_6240	target from/to=[643,666]	-26.30	PREDICTED: centrosomal protein of 97 kDa isoform X2 [Salmo salar]
ssa-miR-338a-3-5p	contig_8167	target from/to=[1609,1633]	-26.30	PREDICTED: collagen alpha-4(IV) chain-like isoform X1 [Salmo salar]
ssa-miR-138-5p	contig_32034	target from/to=[514,536]	-26.30	PREDICTED: uncharacterized protein LOC106591102 [Salmo salar]
ssa-miR-365-5p	contig_100685	target from/to=[2112,2133]	-26.30	PREDICTED: KN motif and ankyrin repeat domain-containing protein 4-like [Salmo salar]
ssa-miR-150-3p	contig_5379	target from/to=[385,406]	-26.30	PREDICTED: zinc finger and SCAN domain-containing protein 2-like [Salmo salar]
ssa-miR-150-3p	contig_12440	target from/to=[1352,1375]	-26.30	PREDICTED: OTU domain-containing protein 5 isoform X1 [Salmo salar]
ssa-miR-19d-5p	contig_46149	target from/to=[356,379]	-26.30	PREDICTED: microtubule-associated protein tau isoform X8 [Salmo salar]
ssa-miR-150-3p	contig_49897	target from/to=[433,452]	-26.30	PREDICTED: collectrin-like isoform X4 [Salmo salar]
ssa-miR-19d-5p	contig_60834	target from/to=[768,791]	-26.30	PREDICTED: UDP-N-acetylglucosamine transporter-like isoform X3 [Salmo salar]
ssa-miR-150-3p	contig_83778	target from/to=[24,45]	-26.30	Transposable element Tcb1 transposase [Salmo salar]
ssa-miR-19d-5p	contig_3735	target from/to=[1373,1396]	-26.30	PREDICTED: myosin light chain kinase, smooth muscle-like isoform X3 [Salmo salar]
ssa-miR-150-3p	contig_5631	target from/to=[971,995]	-26.30	PREDICTED: troponin T, fast skeletal muscle isoforms-like, partial [Salmo salar]
ssa-miR-150-3p	contig_40075	target from/to=[368,389]	-26.30	Transposable element Tcb1 transposase [Salmo salar]
ssa-miR-150-3p	contig_40678	target from/to=[1477,1499]	-26.30	PREDICTED: uncharacterized protein LOC106590678 [Salmo salar]
ssa-miR-206-3p	contig_18881	target from/to=[916,936]	-26.20	Transposable element Tcb1 transposase [Salmo salar]
ssa-miR-199a-5p	contig_21923	target from/to=[5092,5113]	-26.20	PREDICTED: nck-associated protein 5 isoform X1 [Salmo salar]
ssa-miR-204-5p	contig_107385	target from/to=[354,376]	-26.20	PREDICTED: centrosomal protein POC5-like isoform X2 [Salmo salar]
ssa-miR-150-3p	contig_1251	target from/to=[1263,1286]	-26.20	PREDICTED: uncharacterized protein LOC106569078 [Salmo salar]
ssa-miR-92b-3p	contig_1711	target from/to=[1602,1623]	-26.20	PREDICTED: transmembrane protease serine 9-like isoform X2 [Salmo salar]
ssa-miR-150-3p	contig_7080	target from/to=[4181,4204]	-26.20	PREDICTED: NUAK family SNF1-like kinase 1 [Salmo salar]
ssa-miR-150-3p	contig_28973	target from/to=[774,795]	-26.20	High mobility group protein B3 [Salmo salar]
ssa-miR-19d-5p	contig_53731	target from/to=[207,233]	-26.20	PREDICTED: 40S ribosomal protein S5-like [Salmo salar]
ssa-miR-150-3p	contig_56993	target from/to=[663,687]	-26.20	PREDICTED: zinc finger protein 629-like isoform X2 [Salmo salar]
ssa-miR-30a-3p	contig_97305	target from/to=[1129,1149]	-26.20	chaperonin [Salmo salar]
ssa-miR-19d-5p	contig_105445	target from/to=[354,376]	-26.20	PREDICTED: uncharacterized protein LOC106614011 [Salmo salar]
ssa-miR-150-3p	contig_127674	target from/to=[588,607]	-26.20	PREDICTED: striatin-4-like isoform X1 [Salmo salar]
ssa-miR-150-3p	contig_3652	target from/to=[1059,1082]	-26.20	not available
ssa-miR-19d-5p	contig_14311	target from/to=[259,284]	-26.20	PREDICTED: transmembrane protein 179B-like isoform X1 [Salmo salar]
ssa-miR-19d-5p	contig_19506	target from/to=[1736,1759]	-26.20	PREDICTED: A disintegrin and metalloproteinase with thrombospondin motifs 10-like [Salmo salar]
ssa-miR-19d-5p	contig_29630	target from/to=[1556,1579]	-26.20	PREDICTED: dual specificity protein phosphatase 2-like [Salmo salar]
ssa-miR-138-5p	contig_4861	target from/to=[1306,1328]	-26.10	PREDICTED: glycerol-3-phosphate acyltransferase 3-like [Salmo salar]
ssa-miR-338a-3-5p	contig_10354	target from/to=[433,460]	-26.10	PREDICTED: olfactomedin-4-like [Salmo salar]
ssa-miR-133a-3p	contig_60521	target from/to=[40,60]	-26.10	not available
ssa-miR-365-5p	contig_84413	target from/to=[2042,2061]	-26.10	NFAT5a2 [Salmo salar]
ssa-miR-133a-3p	contig_24322	target from/to=[1097,1119]	-26.10	PREDICTED: villin-1 [Salmo salar]
ssa-miR-19d-5p	contig_696	target from/to=[1590,1614]	-26.10	Carbonic anhydrase [Salmo salar]
ssa-miR-150-3p	contig_12727	target from/to=[991,1013]	-26.10	PREDICTED: general transcription factor 3C polypeptide 4-like [Salmo salar]
ssa-miR-150-3p	contig_40683	target from/to=[711,731]	-26.10	PREDICTED: SNARE-associated protein Snapin-like isoform X2 [Salmo salar]
ssa-miR-19d-5p	contig_62981	target from/to=[133,157]	-26.10	not available
ssa-miR-150-3p	contig_70922	target from/to=[1245,1266]	-26.10	PREDICTED: forkhead box protein J3-like isoform X2 [Salmo salar]
ssa-miR-19d-5p	contig_71260	target from/to=[855,877]	-26.10	PREDICTED: putative ferric-chelate reductase 1 isoform X2 [Salmo salar]
ssa-miR-19d-5p	contig_82490	target from/to=[547,569]	-26.10	Sulfate transporter [Salmo salar]
ssa-miR-150-3p	contig_99152	target from/to=[285,307]	-26.10	PREDICTED: dual specificity mitogen-activated protein kinase kinase 7-like isoform X1 [Salmo salar]
ssa-miR-150-3p	contig_32985	target from/to=[651,672]	-26.10	PREDICTED: UDP-N-acetylglucosamine transporter-like isoform X2 [Salmo salar]
ssa-miR-214-5p	contig_4282	target from/to=[2508,2531]	-26.00	PREDICTED: tetratricopeptide repeat protein 7A-like isoform X2 [Salmo salar]
ssa-miR-200a-2-5p	contig_19207	target from/to=[3975,3998]	-26.00	PREDICTED: uncharacterized protein LOC106613429 [Salmo salar]
ssa-miR-338a-3-5p	contig_45701	target from/to=[5149,5175]	-26.00	PREDICTED: phosphatidylinositol 3,4,5-trisphosphate-dependent Rac exchanger 1 protein-like isoform X1 [Salmo salar]
ssa-miR-204-5p	contig_102712	target from/to=[969,992]	-26.00	PREDICTED: hormone-sensitive lipase-like isoform X1 [Salmo salar]
ssa-miR-23b-5p	contig_2468	target from/to=[1551,1571]	-26.00	PREDICTED: lon protease homolog, mitochondrial [Salmo salar]
ssa-miR-375-5p	contig_17804	target from/to=[2016,2038]	-26.00	transposase [Salmo salar]
ssa-miR-19d-5p	contig_17856	target from/to=[4008,4032]	-26.00	PREDICTED: equilibrative nucleoside transporter 1 [Salmo salar]
ssa-miR-19d-5p	contig_25001	target from/to=[1921,1944]	-26.00	PREDICTED: zinc finger BED domain-containing protein 1-like [Salmo salar]
ssa-miR-19d-5p	contig_31764	target from/to=[1044,1070]	-26.00	PREDICTED: rho guanine nucleotide exchange factor 25-like isoform X1 [Salmo salar]
ssa-miR-150-3p	contig_52147	target from/to=[2191,2212]	-26.00	PREDICTED: MAPK/MAK/MRK overlapping kinase-like isoform X3 [Salmo salar]
ssa-miR-150-3p	contig_59162	target from/to=[667,687]	-26.00	PREDICTED: phosphoenolpyruvate carboxykinase [GTP], mitochondrial isoform X1 [Salmo salar]
ssa-miR-19d-5p	contig_6679	target from/to=[2931,2954]	-26.00	PREDICTED: elongation of very long chain fatty acids protein 7-like [Salmo salar]
ssa-miR-150-3p	contig_19903	target from/to=[394,418]	-26.00	PREDICTED: serpin H1-like [Salmo salar]
ssa-miR-23b-5p	contig_21084	target from/to=[6706,6726]	-26.00	PREDICTED: collagen alpha-1(IV) chain-like [Salmo salar]
ssa-miR-150-3p	contig_27391	target from/to=[630,649]	-26.00	PREDICTED: endoribonuclease Dicer-like isoform X2 [Salmo salar]
ssa-miR-122-5p	contig_43925	target from/to=[1711,1733]	-25.90	PREDICTED: uncharacterized protein LOC106569078 [Salmo salar]
ssa-miR-456-5p	contig_57200	target from/to=[2174,2193]	-25.90	PREDICTED: beta-galactoside alpha-2,6-sialyltransferase 2 [Salmo salar]
ssa-miR-133b-3p	contig_3735	target from/to=[2630,2651]	-25.90	PREDICTED: myosin light chain kinase, smooth muscle-like isoform X3 [Salmo salar]
ssa-miR-193-3p	contig_113019	target from/to=[340,361]	-25.90	PREDICTED: obscurin-like isoform X1 [Salmo salar]
ssa-miR-150-3p	contig_894	target from/to=[1353,1373]	-25.90	PREDICTED: uncharacterized protein LOC106600457 [Salmo salar]
ssa-miR-150-3p	contig_7599	target from/to=[438,463]	-25.90	PREDICTED: MARVEL domain-containing protein 3-like isoform X2 [Salmo salar]
ssa-miR-150-3p	contig_8834	target from/to=[1299,1323]	-25.90	PREDICTED: G1/S-specific cyclin-D2-like [Salmo salar]
ssa-miR-125b-1-3p	contig_12913	target from/to=[1823,1842]	-25.90	ATP-binding cassette sub-family B member 8, mitochondrial precursor [Salmo salar]
ssa-miR-19d-5p	contig_23784	target from/to=[1330,1354]	-25.90	PREDICTED: zinc transporter ZIP3-like [Salmo salar]
ssa-miR-150-3p	contig_25257	target from/to=[2143,2162]	-25.90	PREDICTED: evolutionarily conserved signaling intermediate in Toll pathway, mitochondrial [Salmo salar]
ssa-miR-150-3p	contig_28734	target from/to=[452,475]	-25.90	PREDICTED: solute carrier family 22 member 13-like isoform X3 [Salmo salar]
ssa-miR-30a-3p	contig_42254	target from/to=[1757,1776]	-25.90	PREDICTED: uncharacterized protein LOC106575121 [Salmo salar]
ssa-miR-150-3p	contig_52073	target from/to=[185,209]	-25.90	PREDICTED: multiple C2 and transmembrane domain-containing protein 2-like isoform X4 [Salmo salar]
ssa-miR-30a-3p	contig_54147	target from/to=[424,450]	-25.90	SPATA5 [Salmo salar]
ssa-miR-23b-5p	contig_54603	target from/to=[2716,2736]	-25.90	PREDICTED: uncharacterized protein LOC106609103 isoform X4 [Salmo salar]
ssa-miR-19d-5p	contig_61473	target from/to=[437,460]	-25.90	PREDICTED: ryanodine receptor 3-like isoform X4 [Salmo salar]
ssa-miR-19d-5p	contig_4214	target from/to=[659,683]	-25.90	PREDICTED: transcription factor AP-4-like isoform X2 [Salmo salar]
ssa-miR-150-3p	contig_6780	target from/to=[125,145]	-25.90	PREDICTED: annexin A1-like [Salmo salar]
ssa-miR-30a-3p	contig_41216	target from/to=[433,452]	-25.90	PREDICTED: serine/threonine-protein kinase D3-like isoform X1 [Salmo salar]
ssa-miR-150-3p	contig_50949	target from/to=[250,270]	-25.90	PREDICTED: stromal interaction molecule 1-like isoform X2 [Salmo salar]
ssa-miR-150-3p	contig_57089	target from/to=[2752,2775]	-25.90	PREDICTED: brefeldin A-inhibited guanine nucleotide-exchange protein 3 isoform X5 [Salmo salar]
ssa-miR-199a-5p	contig_22228	target from/to=[1436,1460]	-25.80	PREDICTED: serine/threonine-protein kinase pim-3 [Salmo salar]
ssa-miR-138-5p	contig_44145	target from/to=[960,980]	-25.80	PREDICTED: rho GTPase-activating protein 20-like [Salmo salar]
ssa-miR-199a-5p	contig_65540	target from/to=[381,403]	-25.80	PREDICTED: integrator complex subunit 2 [Salmo salar]
ssa-miR-133b-3p	contig_111485	target from/to=[58,79]	-25.80	PREDICTED: pumilio homolog 1-like [Salmo salar]
ssa-miR-133a-3p	contig_3735	target from/to=[2628,2650]	-25.80	PREDICTED: myosin light chain kinase, smooth muscle-like isoform X3 [Salmo salar]
ssa-miR-2188-3p	contig_2701	target from/to=[2977,2997]	-25.80	PREDICTED: 60 kDa heat shock protein, mitochondrial isoform X1 [Salmo salar]
ssa-miR-150-3p	contig_19143	target from/to=[530,553]	-25.80	PREDICTED: homeobox protein cut-like 1 isoform X6 [Salmo salar]
ssa-miR-150-3p	contig_22057	target from/to=[1607,1631]	-25.80	Interferon-related developmental regulator 2 [Salmo salar]
ssa-miR-23b-5p	contig_25257	target from/to=[3362,3381]	-25.80	PREDICTED: evolutionarily conserved signaling intermediate in Toll pathway, mitochondrial [Salmo salar]
ssa-miR-150-3p	contig_26581	target from/to=[1267,1288]	-25.80	PREDICTED: uncharacterized protein LOC106600457 [Salmo salar]
ssa-miR-19d-5p	contig_36760	target from/to=[2785,2808]	-25.80	PREDICTED: DNA-binding protein RFX7-like isoform X1 [Salmo salar]
ssa-miR-23b-5p	contig_42910	target from/to=[1464,1483]	-25.80	PREDICTED: cationic amino acid transporter 4-like [Salmo salar]
ssa-miR-150-3p	contig_44937	target from/to=[29,51]	-25.80	UPF0527 membrane protein [Salmo salar]
ssa-miR-150-3p	contig_85289	target from/to=[135,158]	-25.80	PREDICTED: caspase recruitment domain-containing protein 8-like [Salmo salar]
ssa-miR-19d-5p	contig_103451	target from/to=[1268,1292]	-25.80	PREDICTED: uncharacterized abhydrolase domain-containing protein DDB_G0269086-like isoform X2 [Salmo salar]
ssa-miR-150-3p	contig_13324	target from/to=[771,794]	-25.80	PREDICTED: uncharacterized protein LOC106612744 [Salmo salar]
ssa-miR-30a-3p	contig_21874	target from/to=[2769,2788]	-25.80	PREDICTED: moesin-like [Salmo salar]
ssa-miR-125b-1-3p	contig_57089	target from/to=[744,764]	-25.80	PREDICTED: brefeldin A-inhibited guanine nucleotide-exchange protein 3 isoform X5 [Salmo salar]
ssa-miR-30a-3p	contig_107931	target from/to=[3205,3228]	-25.80	PREDICTED: collagen alpha-1(VIII) chain-like [Salmo salar]
ssa-miR-138-5p	contig_320	target from/to=[4291,4312]	-25.70	PREDICTED: tripartite motif-containing protein 16-like [Salmo salar]
ssa-miR-456-5p	contig_44145	target from/to=[1424,1446]	-25.70	PREDICTED: rho GTPase-activating protein 20-like [Salmo salar]
ssa-miR-138-5p	contig_79762	target from/to=[783,803]	-25.70	PREDICTED: sphingosine-1-phosphate phosphatase 2-like isoform X1 [Salmo salar]
ssa-miR-456-5p	contig_84413	target from/to=[2018,2041]	-25.70	NFAT5a2 [Salmo salar]
ssa-miR-133b-3p	contig_91225	target from/to=[461,480]	-25.70	PREDICTED: collagen alpha-1(VI) chain-like [Salmo salar]
ssa-miR-135b-5p	contig_140720	target from/to=[1079,1102]	-25.70	PREDICTED: gap junction alpha-3 protein-like [Salmo salar]
ssa-miR-150-3p	contig_19143	target from/to=[6305,6330]	-25.70	PREDICTED: homeobox protein cut-like 1 isoform X6 [Salmo salar]
ssa-miR-19d-5p	contig_20468	target from/to=[29,51]	-25.70	PREDICTED: rho GTPase-activating protein 17 isoform X3 [Salmo salar]
ssa-miR-23b-5p	contig_29439	target from/to=[962,983]	-25.70	PREDICTED: stAR-related lipid transfer protein 13-like isoform X1 [Salmo salar]
ssa-miR-150-3p	contig_30492	target from/to=[1902,1925]	-25.70	PREDICTED: uncharacterized protein LOC106567525 isoform X1 [Salmo salar]
ssa-miR-19d-5p	contig_34035	target from/to=[1205,1227]	-25.70	PREDICTED: clathrin heavy chain 1-like isoform X4 [Salmo salar]
ssa-miR-150-3p	contig_53916	target from/to=[1093,1115]	-25.70	transposase [Salmo salar]
ssa-miR-19d-5p	contig_60810	target from/to=[1061,1086]	-25.70	not available
ssa-miR-30a-3p	contig_75571	target from/to=[52,72]	-25.70	PREDICTED: uncharacterized protein LOC106565305 [Salmo salar]
ssa-miR-150-3p	contig_4018	target from/to=[763,784]	-25.70	not available
ssa-miR-150-3p	contig_25906	target from/to=[1020,1041]	-25.70	PREDICTED: vitrin isoform X1 [Salmo salar]
ssa-miR-19d-5p	contig_29197	target from/to=[79,101]	-25.70	PREDICTED: MAPK/MAK/MRK overlapping kinase-like isoform X1 [Salmo salar]
ssa-miR-150-3p	contig_41523	target from/to=[1300,1322]	-25.70	PREDICTED: heat shock 70 kDa protein 12B-like [Salmo salar]
ssa-miR-150-3p	contig_105336	target from/to=[1056,1077]	-25.70	PREDICTED: perforin-1-like isoform X1 [Salmo salar]
ssa-miR-150-3p	contig_122938	target from/to=[114,135]	-25.70	PREDICTED: myocyte-specific enhancer factor 2B [Salmo salar]
ssa-miR-133a-5p	contig_48494	target from/to=[546,566]	-25.60	PREDICTED: zinc finger MYM-type protein 1-like isoform X1 [Salmo salar]
ssa-miR-150-3p	contig_4282	target from/to=[2264,2286]	-25.60	PREDICTED: tetratricopeptide repeat protein 7A-like isoform X2 [Salmo salar]
ssa-miR-150-3p	contig_7358	target from/to=[3843,3865]	-25.60	PREDICTED: LIM domain and actin-binding protein 1-like isoform X1 [Salmo salar]
ssa-miR-19d-5p	contig_8278	target from/to=[1413,1433]	-25.60	Trifunctional enzyme subunit beta, mitochondrial precursor [Salmo salar]
ssa-miR-150-3p	contig_8834	target from/to=[1889,1910]	-25.60	PREDICTED: G1/S-specific cyclin-D2-like [Salmo salar]
ssa-miR-23b-5p	contig_16857	target from/to=[4014,4034]	-25.60	PREDICTED: collagen alpha-6(IV) chain-like isoform X3 [Salmo salar]
ssa-miR-19d-5p	contig_30620	target from/to=[3584,3605]	-25.60	PREDICTED: solute carrier family 12 member 7-like isoform X4 [Salmo salar]
ssa-miR-150-3p	contig_31383	target from/to=[1062,1081]	-25.60	PREDICTED: zinc transporter ZIP14 [Salmo salar]
ssa-miR-150-3p	contig_37692	target from/to=[1670,1693]	-25.60	PREDICTED: protein FAM166B-like [Salmo salar]
ssa-miR-150-3p	contig_46570	target from/to=[175,196]	-25.60	PREDICTED: transmembrane protein 56-B-like isoform X1 [Salmo salar]
ssa-miR-150-3p	contig_53075	target from/to=[1522,1540]	-25.60	Retrotransposable element Tf2 155 kDa protein type 3, partial [Salmo salar]
ssa-miR-19d-5p	contig_57016	target from/to=[569,595]	-25.60	collagen Type XI Alpha2 [Salmo salar]
ssa-miR-150-3p	contig_57127	target from/to=[1269,1289]	-25.60	PREDICTED: transmembrane protein 255A-like isoform X2 [Salmo salar]
ssa-miR-150-3p	contig_71127	target from/to=[1490,1511]	-25.60	PREDICTED: FAD-dependent oxidoreductase domain-containing protein 1 isoform X2 [Salmo salar]
ssa-miR-150-3p	contig_79574	target from/to=[401,420]	-25.60	not available
ssa-miR-19d-5p	contig_85640	target from/to=[1860,1883]	-25.60	PREDICTED: BEN domain-containing protein 5-like isoform X5 [Salmo salar]
ssa-miR-19d-5p	contig_86236	target from/to=[562,584]	-25.60	PREDICTED: protein S100-A5-like isoform X1 [Salmo salar]
ssa-miR-150-3p	contig_21084	target from/to=[3542,3563]	-25.60	PREDICTED: collagen alpha-1(IV) chain-like [Salmo salar]
ssa-miR-30a-3p	contig_32221	target from/to=[1363,1381]	-25.60	not available
ssa-miR-150-3p	contig_32638	target from/to=[2464,2487]	-25.60	PREDICTED: lysyl oxidase homolog 2A-like [Salmo salar]
ssa-miR-150-3p	contig_8610	target from/to=[789,812]	-25.52	PREDICTED: hexokinase-1-like [Salmo salar]
ssa-miR-133a-3p	contig_57016	target from/to=[724,745]	-25.50	collagen Type XI Alpha2 [Salmo salar]
ssa-miR-133b-3p	contig_118610	target from/to=[230,250]	-25.50	not available
ssa-miR-200a-2-5p	contig_107931	target from/to=[1166,1185]	-25.50	PREDICTED: collagen alpha-1(VIII) chain-like [Salmo salar]
ssa-miR-133b-3p	contig_107931	target from/to=[1622,1642]	-25.50	PREDICTED: collagen alpha-1(VIII) chain-like [Salmo salar]
ssa-miR-150-3p	contig_134	target from/to=[2136,2158]	-25.50	PREDICTED: myotubularin-related protein 8-like isoform X1 [Salmo salar]
ssa-miR-19d-5p	contig_597	target from/to=[873,898]	-25.50	Leukocyte elastase inhibitor [Salmo salar]
ssa-miR-150-3p	contig_7080	target from/to=[4380,4398]	-25.50	PREDICTED: NUAK family SNF1-like kinase 1 [Salmo salar]
ssa-miR-19d-5p	contig_7265	target from/to=[213,236]	-25.50	PREDICTED: LETM1 domain-containing protein LETM2, mitochondrial-like isoform X2 [Salmo salar]
ssa-miR-150-3p	contig_13985	target from/to=[1277,1299]	-25.50	PREDICTED: LOW QUALITY PROTEIN: integrin alpha-L-like [Salmo salar]
ssa-miR-92b-3p	contig_23532	target from/to=[62,87]	-25.50	not available
ssa-miR-150-3p	contig_37230	target from/to=[443,464]	-25.50	PREDICTED: receptor-type tyrosine-protein phosphatase alpha-like isoform X1 [Salmo salar]
ssa-miR-150-3p	contig_45666	target from/to=[838,859]	-25.50	not available
ssa-miR-30a-3p	contig_56188	target from/to=[1190,1211]	-25.50	PREDICTED: cingulin-like protein 1 [Salmo salar]
ssa-miR-150-3p	contig_65810	target from/to=[709,729]	-25.50	not available
ssa-miR-150-3p	contig_71245	target from/to=[1123,1146]	-25.50	PREDICTED: fibroblast growth factor 13-like isoform X2 [Salmo salar]
ssa-miR-2188-3p	contig_75571	target from/to=[2295,2317]	-25.50	PREDICTED: uncharacterized protein LOC106565305 [Salmo salar]
ssa-miR-150-3p	contig_100685	target from/to=[1785,1807]	-25.50	PREDICTED: KN motif and ankyrin repeat domain-containing protein 4-like [Salmo salar]
ssa-miR-150-3p	contig_30160	target from/to=[1050,1073]	-25.50	Retrotransposable element Tf2 155 kDa protein type 3, partial [Salmo salar]
ssa-miR-150-3p	contig_32579	target from/to=[283,303]	-25.50	Transposable element Tc1 transposase [Salmo salar]
ssa-miR-150-3p	contig_69979	target from/to=[288,308]	-25.50	PREDICTED: serine--tRNA ligase, mitochondrial isoform X2 [Salmo salar]
ssa-miR-19d-5p	contig_88217	target from/to=[347,371]	-25.50	PREDICTED: uncharacterized protein LOC106572873 isoform X3 [Salmo salar]
ssa-miR-19c-3-5p	contig_6182	target from/to=[392,415]	-25.40	ATP synthase subunit alpha, mitochondrial precursor [Salmo salar]
ssa-miR-449a-5p	contig_11238	target from/to=[3685,3708]	-25.40	PREDICTED: synaptotagmin-like protein 2 isoform X5 [Salmo salar]
ssa-miR-365-5p	contig_21107	target from/to=[4929,4948]	-25.40	PREDICTED: rab effector MyRIP-like isoform X1 [Salmo salar]
ssa-miR-365-5p	contig_33006	target from/to=[2145,2165]	-25.40	PREDICTED: SH3 domain and tetratricopeptide repeat-containing protein 1-like [Salmo salar]
ssa-miR-138-5p	contig_77095	target from/to=[872,893]	-25.40	PREDICTED: uncharacterized protein LOC106607470 [Salmo salar]
ssa-miR-150-3p	contig_13838	target from/to=[2087,2106]	-25.40	PREDICTED: uncharacterized protein LOC106582478 [Salmo salar]
ssa-miR-150-3p	contig_14730	target from/to=[2150,2170]	-25.40	PREDICTED: phosphofurin acidic cluster sorting protein 2-like [Salmo salar]
ssa-miR-150-3p	contig_15632	target from/to=[1017,1038]	-25.40	olfactory receptor family C subfamily 2 member 2 [Salmo salar]
ssa-miR-19d-5p	contig_28412	target from/to=[298,321]	-25.40	PREDICTED: E3 ubiquitin-protein ligase listerin isoform X1 [Salmo salar]
ssa-miR-150-3p	contig_37894	target from/to=[2718,2737]	-25.40	PREDICTED: uncharacterized protein LOC106561506 [Salmo salar]
ssa-miR-150-3p	contig_52073	target from/to=[159,178]	-25.40	PREDICTED: multiple C2 and transmembrane domain-containing protein 2-like isoform X4 [Salmo salar]
ssa-miR-19d-5p	contig_52929	target from/to=[1696,1717]	-25.40	PREDICTED: midasin-like [Salmo salar]
ssa-miR-19d-5p	contig_32199	target from/to=[786,809]	-25.40	Alpha-1,3-fucosyltransferase 11 [Salmo salar]
ssa-miR-2188-3p	contig_42475	target from/to=[1712,1731]	-25.40	PREDICTED: fibroblast growth factor receptor-like 1 isoform X1 [Salmo salar]
ssa-miR-150-3p	contig_109200	target from/to=[3144,3167]	-25.40	PREDICTED: sodium bicarbonate transporter-like protein 11 isoform X2 [Salmo salar]
ssa-miR-2184-3p	contig_29439	target from/to=[884,904]	-25.30	PREDICTED: stAR-related lipid transfer protein 13-like isoform X1 [Salmo salar]
ssa-miR-199a-5p	contig_62301	target from/to=[3596,3617]	-25.30	PREDICTED: A disintegrin and metalloproteinase with thrombospondin motifs 9-like [Salmo salar]
ssa-miR-133a-3p	contig_85754	target from/to=[1423,1443]	-25.30	PREDICTED: glucagon receptor-like [Salmo salar]
ssa-miR-204-5p	contig_9652	target from/to=[444,463]	-25.30	PREDICTED: CB055 protein isoform X3 [Salmo salar]
ssa-miR-150-3p	contig_4061	target from/to=[924,943]	-25.30	PREDICTED: translocator protein-like [Salmo salar]
ssa-miR-30a-3p	contig_6985	target from/to=[2929,2950]	-25.30	PREDICTED: Y+L amino acid transporter 2-like [Salmo salar]
ssa-miR-19d-5p	contig_13838	target from/to=[2169,2192]	-25.30	PREDICTED: uncharacterized protein LOC106582478 [Salmo salar]
ssa-miR-150-3p	contig_15626	target from/to=[2609,2629]	-25.30	Protein-glutamine gamma-glutamyltransferase 2 [Salmo salar]
ssa-miR-150-3p	contig_22040	target from/to=[2275,2295]	-25.30	PREDICTED: ATPase family AAA domain-containing protein 3 isoform X1 [Salmo salar]
ssa-miR-30a-3p	contig_22057	target from/to=[1625,1644]	-25.30	Interferon-related developmental regulator 2 [Salmo salar]
ssa-miR-150-3p	contig_23532	target from/to=[665,686]	-25.30	not available
ssa-miR-2188-3p	contig_23669	target from/to=[904,927]	-25.30	PREDICTED: fibroblast growth factor receptor-like 1 [Salmo salar]
ssa-miR-150-3p	contig_23672	target from/to=[655,675]	-25.30	PREDICTED: peptidyl-prolyl cis-trans isomerase A-like isoform X1 [Salmo salar]
ssa-miR-150-3p	contig_34777	target from/to=[810,829]	-25.30	PREDICTED: neurochondrin [Salmo salar]
ssa-miR-150-3p	contig_41992	target from/to=[1280,1304]	-25.30	not available
ssa-miR-30a-3p	contig_48880	target from/to=[265,283]	-25.30	Mannose-6-phosphate receptor-binding protein 1 [Salmo salar]
ssa-miR-150-3p	contig_52929	target from/to=[2301,2323]	-25.30	PREDICTED: midasin-like [Salmo salar]
ssa-miR-23b-5p	contig_64308	target from/to=[384,404]	-25.30	PREDICTED: lymphoid-restricted membrane protein-like isoform X5 [Salmo salar]
ssa-miR-150-3p	contig_65697	target from/to=[561,582]	-25.30	PREDICTED: dynamin-2-like isoform X3 [Salmo salar]
ssa-miR-150-3p	contig_66247	target from/to=[1005,1027]	-25.30	PREDICTED: collagen alpha-1(VI) chain-like [Salmo salar]
ssa-miR-150-3p	contig_107145	target from/to=[410,429]	-25.30	not available
ssa-miR-150-3p	contig_31076	target from/to=[3956,3975]	-25.30	PREDICTED: EMILIN-3 [Salmo salar]
ssa-miR-19d-5p	contig_90244	target from/to=[228,250]	-25.30	PREDICTED: lysosomal amino acid transporter 1 homolog isoform X2 [Salmo salar]
ssa-miR-150-3p	contig_96765	target from/to=[521,546]	-25.30	PREDICTED: uncharacterized protein LOC106565877 isoform X2 [Salmo salar]
ssa-miR-19d-5p	contig_108154	target from/to=[229,252]	-25.30	PREDICTED: bromodomain-containing protein 1-like, partial [Salmo salar]
ssa-miR-30a-3p	contig_117751	target from/to=[252,274]	-25.30	PREDICTED: ethanolamine kinase 1-like [Salmo salar]
ssa-miR-200a-2-5p	contig_13064	target from/to=[1218,1237]	-25.20	ATP-binding cassette sub-family F member 2 [Salmo salar]
ssa-miR-204-5p	contig_14206	target from/to=[2998,3019]	-25.20	PREDICTED: protein Shroom3-like isoform X2 [Salmo salar]
ssa-miR-204-5p	contig_14258	target from/to=[287,310]	-25.20	PREDICTED: peroxisomal acyl-coenzyme A oxidase 1 isoform X1 [Salmo salar]
ssa-miR-193-3p	contig_14971	target from/to=[615,635]	-25.20	PREDICTED: putative sodium-coupled neutral amino acid transporter 10 isoform X10 [Salmo salar]
ssa-miR-138-5p	contig_15422	target from/to=[639,662]	-25.20	collagen Type XI Alpha2 [Salmo salar]
ssa-miR-122-5p	contig_28380	target from/to=[1293,1312]	-25.20	PREDICTED: zinc finger MYND domain-containing protein 11 isoform X4 [Salmo salar]
ssa-miR-8163-5p	contig_62529	target from/to=[2821,2845]	-25.20	PREDICTED: microtubule-associated protein 2-like isoform X10 [Salmo salar]
ssa-miR-8163-5p	contig_78303	target from/to=[11,32]	-25.20	not available
ssa-miR-214-5p	contig_2867	target from/to=[1304,1326]	-25.20	Microfibrillar-associated protein 2 precursor [Salmo salar]
ssa-miR-18b-5p	contig_80978	target from/to=[814,836]	-25.20	PREDICTED: secretory phospholipase A2 receptor-like isoform X3 [Salmo salar]
ssa-miR-30a-3p	contig_3337	target from/to=[4849,4870]	-25.20	PREDICTED: uncharacterized protein LOC106569888, partial [Salmo salar]
ssa-miR-150-3p	contig_4282	target from/to=[2095,2118]	-25.20	PREDICTED: tetratricopeptide repeat protein 7A-like isoform X2 [Salmo salar]
ssa-miR-19d-5p	contig_5416	target from/to=[577,601]	-25.20	PREDICTED: fumarylacetoacetate hydrolase domain-containing protein 2-like isoform X1 [Salmo salar]
ssa-miR-23b-5p	contig_6240	target from/to=[400,418]	-25.20	PREDICTED: centrosomal protein of 97 kDa isoform X2 [Salmo salar]
ssa-miR-150-3p	contig_7599	target from/to=[956,979]	-25.20	PREDICTED: MARVEL domain-containing protein 3-like isoform X2 [Salmo salar]
ssa-miR-30a-3p	contig_15626	target from/to=[1857,1879]	-25.20	Protein-glutamine gamma-glutamyltransferase 2 [Salmo salar]
ssa-miR-150-3p	contig_16515	target from/to=[1196,1219]	-25.20	PREDICTED: UDP-N-acetylglucosamine transporter-like isoform X3 [Salmo salar]
ssa-miR-30a-3p	contig_30620	target from/to=[251,271]	-25.20	PREDICTED: solute carrier family 12 member 7-like isoform X4 [Salmo salar]
ssa-miR-19d-5p	contig_32880	target from/to=[224,245]	-25.20	not available
ssa-miR-92b-3p	contig_48500	target from/to=[2072,2093]	-25.20	PREDICTED: serine--tRNA ligase, mitochondrial isoform X2 [Salmo salar]
ssa-miR-150-3p	contig_63549	target from/to=[331,350]	-25.20	PREDICTED: RNA-directed DNA polymerase homolog [Salmo salar]
ssa-miR-19d-5p	contig_7784	target from/to=[187,209]	-25.20	PREDICTED: CMRF35-like molecule 5, partial [Salmo salar]
ssa-miR-150-3p	contig_55074	target from/to=[1249,1270]	-25.20	PREDICTED: endothelin B receptor-like [Salmo salar]
ssa-miR-19d-5p	contig_72310	target from/to=[910,932]	-25.20	PREDICTED: tau-tubulin kinase 2-like isoform X1 [Salmo salar]
ssa-miR-133a-3p	contig_3337	target from/to=[3874,3896]	-25.10	PREDICTED: uncharacterized protein LOC106569888, partial [Salmo salar]
ssa-miR-214-5p	contig_44207	target from/to=[1338,1359]	-25.10	PREDICTED: probable helicase senataxin isoform X2 [Salmo salar]
ssa-miR-133a-3p	contig_91225	target from/to=[459,479]	-25.10	PREDICTED: collagen alpha-1(VI) chain-like [Salmo salar]
ssa-miR-206-3p	contig_18495	target from/to=[2605,2626]	-25.10	PREDICTED: tRNA:m(4)X modification enzyme TRM13 homolog isoform X1 [Salmo salar]
ssa-miR-150-3p	contig_3111	target from/to=[892,913]	-25.10	PREDICTED: solute carrier family 2, facilitated glucose transporter member 1 isoform X2 [Salmo salar]
ssa-miR-23b-5p	contig_8750	target from/to=[604,625]	-25.10	PREDICTED: pikachurin-like [Salmo salar]
ssa-miR-150-3p	contig_19255	target from/to=[3160,3178]	-25.10	PREDICTED: fibronectin type-III domain-containing protein 3A-like, partial [Salmo salar]
ssa-miR-23b-5p	contig_22300	target from/to=[924,943]	-25.10	FGF2 [Salmo salar]
ssa-miR-19d-5p	contig_25782	target from/to=[3774,3799]	-25.10	PREDICTED: phosphatidylinositol 3-kinase regulatory subunit gamma isoform X1 [Salmo salar]
ssa-miR-150-3p	contig_28441	target from/to=[502,523]	-25.10	PREDICTED: 39S ribosomal protein L38, mitochondrial [Salmo salar]
ssa-miR-2188-3p	contig_29063	target from/to=[461,480]	-25.10	Myelin protein zero-like protein 2 precursor [Salmo salar]
ssa-miR-150-3p	contig_35324	target from/to=[1372,1395]	-25.10	PREDICTED: lariat debranching enzyme isoform X1 [Salmo salar]
ssa-miR-150-3p	contig_38337	target from/to=[2381,2400]	-25.10	PREDICTED: zinc finger and SCAN domain-containing protein 2-like [Salmo salar]
ssa-miR-19d-5p	contig_61473	target from/to=[742,766]	-25.10	PREDICTED: ryanodine receptor 3-like isoform X4 [Salmo salar]
ssa-miR-150-3p	contig_76091	target from/to=[1669,1692]	-25.10	PVRL2 [Salmo salar]
ssa-miR-150-3p	contig_82490	target from/to=[713,731]	-25.10	Sulfate transporter [Salmo salar]
ssa-miR-150-3p	contig_16782	target from/to=[451,474]	-25.10	PREDICTED: myotubularin-related protein 2-like isoform X2 [Salmo salar]
ssa-miR-150-3p	contig_24103	target from/to=[1681,1705]	-25.10	PREDICTED: troponin I, slow skeletal muscle-like isoform X2 [Salmo salar]
ssa-miR-19d-5p	contig_77805	target from/to=[1716,1739]	-25.10	PREDICTED: cysteine/serine-rich nuclear protein 3-like isoform X1 [Salmo salar]
ssa-miR-8163-5p	contig_1410	target from/to=[980,1002]	-25.00	PREDICTED: epithelial cell adhesion molecule isoform X1 [Salmo salar]
ssa-miR-8163-5p	contig_8994	target from/to=[669,690]	-25.00	Transposable element Tcb1 transposase [Salmo salar]
ssa-miR-206-3p	contig_37677	target from/to=[702,726]	-25.00	PREDICTED: uncharacterized protein LOC106597293 [Salmo salar]
ssa-miR-214-5p	contig_103451	target from/to=[3151,3172]	-25.00	PREDICTED: uncharacterized abhydrolase domain-containing protein DDB_G0269086-like isoform X2 [Salmo salar]
ssa-miR-8163-5p	contig_117460	target from/to=[132,153]	-25.00	PREDICTED: protein-methionine sulfoxide oxidase MICAL2-like isoform X2 [Salmo salar]
ssa-miR-365-5p	contig_32638	target from/to=[1758,1775]	-25.00	PREDICTED: lysyl oxidase homolog 2A-like [Salmo salar]
ssa-miR-19d-5p	contig_5120	target from/to=[1572,1598]	-25.00	not available
ssa-miR-30a-3p	contig_8770	target from/to=[240,260]	-25.00	Acidic leucine-rich nuclear phosphoprotein 32 family member B [Salmo salar]
ssa-miR-19d-5p	contig_19143	target from/to=[1455,1477]	-25.00	PREDICTED: homeobox protein cut-like 1 isoform X6 [Salmo salar]
ssa-miR-92b-3p	contig_21247	target from/to=[984,1005]	-25.00	KIAA0141 [Salmo salar]
ssa-miR-150-3p	contig_24495	target from/to=[751,773]	-25.00	PREDICTED: F-BAR domain only protein 2-like isoform X15 [Salmo salar]
ssa-miR-19d-5p	contig_42693	target from/to=[1746,1770]	-25.00	Epoxide hydrolase 1 [Salmo salar]
ssa-miR-150-3p	contig_43292	target from/to=[125,146]	-25.00	not available
ssa-miR-125b-1-3p	contig_44860	target from/to=[82,100]	-25.00	not available
ssa-miR-30a-3p	contig_52929	target from/to=[2069,2090]	-25.00	PREDICTED: midasin-like [Salmo salar]
ssa-miR-150-3p	contig_62020	target from/to=[1395,1415]	-25.00	PREDICTED: PHD finger protein 13-like [Salmo salar]
ssa-miR-150-3p	contig_65540	target from/to=[22,43]	-25.00	PREDICTED: integrator complex subunit 2 [Salmo salar]
ssa-miR-19d-5p	contig_79652	target from/to=[175,197]	-25.00	not available
ssa-miR-150-3p	contig_85640	target from/to=[1360,1385]	-25.00	PREDICTED: BEN domain-containing protein 5-like isoform X5 [Salmo salar]
ssa-miR-19d-5p	contig_150	target from/to=[1267,1292]	-25.00	PREDICTED: interferon-induced guanylate-binding protein 1-like [Salmo salar]
ssa-miR-150-3p	contig_5064	target from/to=[752,772]	-25.00	PREDICTED: matrix metalloproteinase-15-like [Salmo salar]
ssa-miR-150-3p	contig_19506	target from/to=[2334,2354]	-25.00	PREDICTED: A disintegrin and metalloproteinase with thrombospondin motifs 10-like [Salmo salar]
ssa-miR-30a-3p	contig_52215	target from/to=[1900,1923]	-25.00	PREDICTED: OX-2 membrane glycoprotein [Salmo salar]
ssa-miR-150-3p	contig_73012	target from/to=[851,874]	-25.00	insulin-like growth factor binding protein 3 paralog B1 [Salmo salar]
ssa-miR-150-3p	contig_78167	target from/to=[1887,1906]	-25.00	PREDICTED: endosialin-like [Salmo salar]
ssa-miR-150-3p	contig_162752	target from/to=[297,320]	-25.00	not available
ssa-miR-10a-5p	contig_5406	target from/to=[1151,1175]	-24.90	PREDICTED: glutenin, high molecular weight subunit DY10-like isoform X1 [Salmo salar]
ssa-miR-456-5p	contig_6240	target from/to=[288,307]	-24.90	PREDICTED: centrosomal protein of 97 kDa isoform X2 [Salmo salar]
ssa-miR-214-5p	contig_21923	target from/to=[2922,2945]	-24.90	PREDICTED: nck-associated protein 5 isoform X1 [Salmo salar]
ssa-miR-204-5p	contig_31121	target from/to=[1066,1086]	-24.90	not available
ssa-miR-8163-5p	contig_40834	target from/to=[555,578]	-24.90	PREDICTED: rho-related BTB domain-containing protein 2-like isoform X2 [Salmo salar]
ssa-miR-138-5p	contig_44786	target from/to=[642,664]	-24.90	PREDICTED: uncharacterized protein LOC106611174 [Salmo salar]
ssa-miR-193-3p	contig_60521	target from/to=[716,739]	-24.90	not available
ssa-miR-138-5p	contig_95436	target from/to=[117,137]	-24.90	TNF-alpha-4 isoform [Salmo salar]
ssa-miR-449a-5p	contig_95478	target from/to=[151,174]	-24.90	PREDICTED: venom factor-like, partial [Salmo salar]
ssa-miR-21b-5p	contig_133930	target from/to=[371,394]	-24.90	PREDICTED: upstream stimulatory factor 2-like [Salmo salar]
ssa-miR-214-5p	contig_5064	target from/to=[769,789]	-24.90	PREDICTED: matrix metalloproteinase-15-like [Salmo salar]
ssa-miR-19d-5p	contig_1675	target from/to=[184,208]	-24.90	PREDICTED: probable cation-transporting ATPase 13A3 isoform X3 [Salmo salar]
ssa-miR-19d-5p	contig_4344	target from/to=[1418,1438]	-24.90	PREDICTED: sialic acid synthase-like [Salmo salar]
ssa-miR-150-3p	contig_6642	target from/to=[24,45]	-24.90	PREDICTED: uncharacterized protein LOC106570113 isoform X2 [Salmo salar]
ssa-miR-19d-5p	contig_16857	target from/to=[1775,1798]	-24.90	PREDICTED: collagen alpha-6(IV) chain-like isoform X3 [Salmo salar]
ssa-miR-150-3p	contig_17257	target from/to=[171,191]	-24.90	PREDICTED: uncharacterized protein LOC106600457 [Salmo salar]
ssa-miR-19d-5p	contig_17505	target from/to=[933,953]	-24.90	PREDICTED: diacylglycerol O-acyltransferase 1-like [Salmo salar]
ssa-miR-2188-3p	contig_20113	target from/to=[161,185]	-24.90	hypothetical protein, partial [Salmo salar]
ssa-miR-150-3p	contig_22094	target from/to=[3212,3234]	-24.90	tripartite motif-containing protein 16-like protein [Salmo salar]
ssa-miR-92b-3p	contig_28412	target from/to=[243,267]	-24.90	PREDICTED: E3 ubiquitin-protein ligase listerin isoform X1 [Salmo salar]
ssa-miR-125b-1-3p	contig_34373	target from/to=[502,520]	-24.90	PREDICTED: uncharacterized protein LOC106572581 isoform X4 [Salmo salar]
ssa-miR-150-3p	contig_35564	target from/to=[2316,2338]	-24.90	PREDICTED: transcription factor SOX-6-like isoform X2 [Salmo salar]
ssa-miR-19d-5p	contig_40834	target from/to=[473,493]	-24.90	PREDICTED: rho-related BTB domain-containing protein 2-like isoform X2 [Salmo salar]
ssa-miR-19d-5p	contig_50913	target from/to=[228,253]	-24.90	Transposable element Tcb1 transposase [Salmo salar]
ssa-miR-19d-5p	contig_56568	target from/to=[153,179]	-24.90	not available
ssa-miR-150-3p	contig_64707	target from/to=[82,103]	-24.90	FGF2 [Salmo salar]
ssa-miR-30a-3p	contig_70239	target from/to=[681,703]	-24.90	PREDICTED: clathrin heavy chain 1-like isoform X4 [Salmo salar]
ssa-miR-19d-5p	contig_84413	target from/to=[1710,1733]	-24.90	NFAT5a2 [Salmo salar]
ssa-miR-19d-5p	contig_91907	target from/to=[1164,1187]	-24.90	PREDICTED: protein FAM110B-like [Salmo salar]
ssa-miR-19d-5p	contig_102442	target from/to=[204,224]	-24.90	not available
ssa-miR-19d-5p	contig_135218	target from/to=[502,527]	-24.90	not available
ssa-miR-19d-5p	contig_22715	target from/to=[471,497]	-24.90	PREDICTED: TBC1 domain family member 12-like isoform X2 [Salmo salar]
ssa-miR-2188-3p	contig_60825	target from/to=[2628,2649]	-24.90	PREDICTED: EMILIN-1-like isoform X1 [Salmo salar]
ssa-miR-138-5p	contig_521	target from/to=[1746,1773]	-24.80	Rhamnose-binding lectin precursor [Salmo salar]
ssa-miR-8163-5p	contig_659	target from/to=[834,858]	-24.80	PREDICTED: golgin subfamily B member 1-like isoform X3 [Salmo salar]
ssa-miR-10a-5p	contig_16857	target from/to=[2218,2240]	-24.80	PREDICTED: collagen alpha-6(IV) chain-like isoform X3 [Salmo salar]
ssa-miR-138-5p	contig_38337	target from/to=[2866,2890]	-24.80	PREDICTED: zinc finger and SCAN domain-containing protein 2-like [Salmo salar]
ssa-miR-17-5p	contig_78652	target from/to=[3353,3374]	-24.80	PREDICTED: protein phosphatase 1 regulatory subunit 12A-like isoform X7 [Salmo salar]
ssa-miR-138-5p	contig_8819	target from/to=[4288,4310]	-24.80	PREDICTED: anosmin-1-like [Salmo salar]
ssa-miR-204-5p	contig_66355	target from/to=[200,222]	-24.80	transposase [Salmo salar]
ssa-miR-132-3p	contig_107931	target from/to=[407,426]	-24.80	PREDICTED: collagen alpha-1(VIII) chain-like [Salmo salar]
ssa-miR-150-3p	contig_415	target from/to=[1661,1682]	-24.80	PREDICTED: annexin A2-like isoform X2 [Salmo salar]
ssa-miR-19d-5p	contig_481	target from/to=[798,821]	-24.80	PREDICTED: cytochrome c1, heme protein, mitochondrial-like [Salmo salar]
ssa-miR-150-3p	contig_1572	target from/to=[772,791]	-24.80	PREDICTED: amyloid beta A4 precursor protein-binding family B member 1-like isoform X4 [Salmo salar]
ssa-miR-150-3p	contig_2701	target from/to=[2141,2166]	-24.80	PREDICTED: 60 kDa heat shock protein, mitochondrial isoform X1 [Salmo salar]
ssa-miR-150-3p	contig_6193	target from/to=[202,221]	-24.80	PREDICTED: glutathione reductase, mitochondrial isoform X1 [Salmo salar]
ssa-miR-150-3p	contig_8505	target from/to=[1161,1180]	-24.80	GrpE protein homolog 1, mitochondrial precursor [Salmo salar]
ssa-miR-150-3p	contig_11634	target from/to=[481,502]	-24.80	Threonyl-tRNA synthetase, cytoplasmic, partial [Salmo salar]
ssa-miR-150-3p	contig_21256	target from/to=[2107,2129]	-24.80	PREDICTED: Krueppel-like factor 15 [Salmo salar]
ssa-miR-30a-3p	contig_21923	target from/to=[6073,6093]	-24.80	PREDICTED: nck-associated protein 5 isoform X1 [Salmo salar]
ssa-miR-150-3p	contig_22100	target from/to=[243,263]	-24.80	not available
ssa-miR-19d-5p	contig_28489	target from/to=[417,441]	-24.80	PREDICTED: ras and Rab interactor 2-like [Salmo salar]
ssa-miR-19d-5p	contig_33006	target from/to=[2702,2726]	-24.80	PREDICTED: SH3 domain and tetratricopeptide repeat-containing protein 1-like [Salmo salar]
ssa-miR-150-3p	contig_41132	target from/to=[4450,4471]	-24.80	PREDICTED: probable G-protein coupled receptor 52 [Salmo salar]
ssa-miR-2188-3p	contig_42910	target from/to=[2152,2173]	-24.80	PREDICTED: cationic amino acid transporter 4-like [Salmo salar]
ssa-miR-150-3p	contig_48618	target from/to=[2418,2436]	-24.80	Transposable element Tcb1 transposase [Salmo salar]
ssa-miR-150-3p	contig_63458	target from/to=[397,419]	-24.80	PREDICTED: replication factor C subunit 1 [Salmo salar]
ssa-miR-222b-5p	contig_78633	target from/to=[1169,1189]	-24.80	transposase [Salmo salar]
ssa-miR-150-3p	contig_79883	target from/to=[897,917]	-24.80	PREDICTED: ribosomal protein S6 kinase alpha-5-like isoform X3 [Salmo salar]
ssa-miR-19d-5p	contig_81465	target from/to=[281,304]	-24.80	PREDICTED: uncharacterized protein LOC106597293 [Salmo salar]
ssa-miR-30a-3p	contig_100685	target from/to=[1972,1994]	-24.80	PREDICTED: KN motif and ankyrin repeat domain-containing protein 4-like [Salmo salar]
ssa-miR-150-3p	contig_103451	target from/to=[1277,1299]	-24.80	PREDICTED: uncharacterized abhydrolase domain-containing protein DDB_G0269086-like isoform X2 [Salmo salar]
ssa-miR-150-3p	contig_138514	target from/to=[1000,1020]	-24.80	PREDICTED: dematin isoform X5 [Salmo salar]
ssa-miR-30a-3p	contig_1271	target from/to=[3922,3944]	-24.80	PREDICTED: taperin-like [Salmo salar]
ssa-miR-92b-3p	contig_9652	target from/to=[1526,1548]	-24.80	PREDICTED: CB055 protein isoform X3 [Salmo salar]
ssa-miR-2188-3p	contig_12275	target from/to=[1066,1086]	-24.80	PREDICTED: hyaluronidase-4-like [Salmo salar]
ssa-miR-23b-5p	contig_21084	target from/to=[2296,2315]	-24.80	PREDICTED: collagen alpha-1(IV) chain-like [Salmo salar]
ssa-miR-19d-5p	contig_21955	target from/to=[80,103]	-24.80	PREDICTED: MAPK/MAK/MRK overlapping kinase-like isoform X3 [Salmo salar]
ssa-miR-150-3p	contig_30530	target from/to=[1962,1983]	-24.80	PREDICTED: actin filament-associated protein 1-like 2 isoform X2 [Salmo salar]
ssa-miR-30a-3p	contig_32333	target from/to=[252,274]	-24.80	PREDICTED: pinopsin-like [Salmo salar]
ssa-miR-133b-3p	contig_1513	target from/to=[2253,2273]	-24.70	PREDICTED: von Willebrand factor A domain-containing protein 7-like [Salmo salar]
ssa-miR-199a-5p	contig_11622	target from/to=[579,599]	-24.70	PREDICTED: BCL2/adenovirus E1B 19 kDa protein-interacting protein 2-like [Salmo salar]
ssa-miR-138-5p	contig_75082	target from/to=[591,615]	-24.70	PREDICTED: ras-related protein Rab-9B-like [Salmo salar]
ssa-miR-365-5p	contig_88051	target from/to=[461,483]	-24.70	COL11A2, partial [Salmo salar]
ssa-miR-365-5p	contig_90754	target from/to=[703,721]	-24.70	PREDICTED: leucine-rich repeat-containing protein 15-like [Salmo salar]
ssa-miR-214-5p	contig_98614	target from/to=[1016,1039]	-24.70	PREDICTED: laminin subunit alpha-2 [Salmo salar]
ssa-miR-19d-5p	contig_4282	target from/to=[382,404]	-24.70	PREDICTED: tetratricopeptide repeat protein 7A-like isoform X2 [Salmo salar]
ssa-miR-150-3p	contig_9986	target from/to=[426,448]	-24.70	PREDICTED: CMP-N-acetylneuraminate-beta-galactosamide-alpha-2,3-sialyltransferase 1-like isoform X3 [Salmo salar]
ssa-miR-19d-5p	contig_19143	target from/to=[6299,6322]	-24.70	PREDICTED: homeobox protein cut-like 1 isoform X6 [Salmo salar]
ssa-miR-150-3p	contig_20352	target from/to=[2024,2043]	-24.70	PREDICTED: serine/threonine-protein phosphatase 6 regulatory ankyrin repeat subunit C-like isoform X2 [Salmo salar]
ssa-miR-150-3p	contig_24052	target from/to=[418,438]	-24.70	not available
ssa-miR-19d-5p	contig_30505	target from/to=[26,49]	-24.70	PREDICTED: uncharacterized protein LOC106605384, partial [Salmo salar]
ssa-miR-30a-3p	contig_39810	target from/to=[324,342]	-24.70	PREDICTED: uncharacterized protein LOC106604990, partial [Salmo salar]
ssa-miR-150-3p	contig_46192	target from/to=[372,395]	-24.70	Transposable element Tcb1 transposase [Salmo salar]
ssa-miR-19d-5p	contig_52916	target from/to=[336,359]	-24.70	not available
ssa-miR-150-3p	contig_64256	target from/to=[768,787]	-24.70	PREDICTED: tryptophan 5-hydroxylase 1-like [Salmo salar]
ssa-miR-181a-4-3p	contig_79205	target from/to=[2375,2395]	-24.70	PREDICTED: uncharacterized protein LOC106563789 [Salmo salar]
ssa-miR-2188-3p	contig_89528	target from/to=[979,1001]	-24.70	Retrotransposable element Tf2 155 kDa protein type 3, partial [Salmo salar]
ssa-miR-150-3p	contig_58200	target from/to=[1917,1940]	-24.70	PREDICTED: zinc finger protein 883-like isoform X2 [Salmo salar]
ssa-miR-222b-5p	contig_60042	target from/to=[1756,1776]	-24.70	not available
ssa-miR-19d-5p	contig_83706	target from/to=[1687,1712]	-24.70	PREDICTED: WD repeat and coiled-coil-containing protein C2orf44 homolog isoform X1 [Salmo salar]
ssa-miR-30a-3p	contig_98614	target from/to=[3271,3290]	-24.70	PREDICTED: laminin subunit alpha-2 [Salmo salar]
ssa-miR-8163-5p	contig_966	target from/to=[2374,2398]	-24.60	Cathepsin B precursor [Salmo salar]
ssa-miR-138-5p	contig_1688	target from/to=[195,215]	-24.60	not available
ssa-miR-133b-3p	contig_3337	target from/to=[3877,3897]	-24.60	PREDICTED: uncharacterized protein LOC106569888, partial [Salmo salar]
ssa-miR-19c-3-5p	contig_21107	target from/to=[4769,4788]	-24.60	PREDICTED: rab effector MyRIP-like isoform X1 [Salmo salar]
ssa-miR-138-5p	contig_30620	target from/to=[490,512]	-24.60	PREDICTED: solute carrier family 12 member 7-like isoform X4 [Salmo salar]
ssa-miR-138-5p	contig_32027	target from/to=[97,120]	-24.60	Transposable element Tcb2 transposase [Salmo salar]
ssa-miR-138-5p	contig_62529	target from/to=[961,982]	-24.60	PREDICTED: microtubule-associated protein 2-like isoform X10 [Salmo salar]
ssa-miR-193-3p	contig_88098	target from/to=[1351,1371]	-24.60	PREDICTED: neurabin-1-like isoform X5 [Salmo salar]
ssa-miR-132-3p	contig_112410	target from/to=[1619,1638]	-24.60	UPF0527 membrane protein [Salmo salar]
ssa-miR-138-5p	contig_137227	target from/to=[1943,1963]	-24.60	PREDICTED: acyl carrier protein, mitochondrial-like [Salmo salar]
ssa-miR-8163-5p	contig_9652	target from/to=[439,460]	-24.60	PREDICTED: CB055 protein isoform X3 [Salmo salar]
ssa-miR-193-3p	contig_103484	target from/to=[2226,2246]	-24.60	PREDICTED: neurabin-1 isoform X5 [Salmo salar]
ssa-miR-150-3p	contig_4264	target from/to=[1989,2009]	-24.60	ORF2 protein [Salmo salar]
ssa-miR-19d-5p	contig_10313	target from/to=[985,1010]	-24.60	not available
ssa-miR-19d-5p	contig_24071	target from/to=[460,481]	-24.60	not available
ssa-miR-30a-3p	contig_35942	target from/to=[5494,5513]	-24.60	PREDICTED: cysteine-rich motor neuron 1 protein-like [Salmo salar]
ssa-miR-92b-3p	contig_40834	target from/to=[2006,2026]	-24.60	PREDICTED: rho-related BTB domain-containing protein 2-like isoform X2 [Salmo salar]
ssa-miR-19d-5p	contig_43451	target from/to=[1414,1438]	-24.60	not available
ssa-miR-150-3p	contig_56488	target from/to=[370,389]	-24.60	PREDICTED: NF-kappa-B inhibitor-interacting Ras-like protein 1 [Salmo salar]
ssa-miR-19d-5p	contig_56611	target from/to=[351,376]	-24.60	PREDICTED: glutenin, high molecular weight subunit DY10-like isoform X3 [Salmo salar]
ssa-miR-19d-5p	contig_62529	target from/to=[1339,1360]	-24.60	PREDICTED: microtubule-associated protein 2-like isoform X10 [Salmo salar]
ssa-miR-150-3p	contig_62642	target from/to=[707,729]	-24.60	PREDICTED: RING finger protein 157-like isoform X5 [Salmo salar]
ssa-miR-150-3p	contig_3892	target from/to=[1196,1215]	-24.60	PREDICTED: collagen alpha-1(X) chain-like [Salmo salar]
ssa-miR-150-3p	contig_94190	target from/to=[780,801]	-24.60	PREDICTED: obscurin-like isoform X1 [Salmo salar]
ssa-miR-122-5p	contig_186	target from/to=[2711,2733]	-24.50	hypothetical protein, partial [Salmo salar]
ssa-miR-122-5p	contig_3829	target from/to=[317,338]	-24.50	60S acidic ribosomal protein P0 [Salmo salar]
ssa-miR-15b-5p	contig_10358	target from/to=[848,869]	-24.50	PREDICTED: protein NDRG2 [Salmo salar]
ssa-miR-338a-3-5p	contig_15096	target from/to=[3583,3610]	-24.50	PREDICTED: basement membrane-specific heparan sulfate proteoglycan core protein-like isoform X18 [Salmo salar]
ssa-miR-138-5p	contig_30492	target from/to=[920,941]	-24.50	PREDICTED: uncharacterized protein LOC106567525 isoform X1 [Salmo salar]
ssa-miR-214-5p	contig_36480	target from/to=[210,232]	-24.50	PREDICTED: probable E3 ubiquitin-protein ligase HERC1, partial [Salmo salar]
ssa-miR-19c-3-5p	contig_42693	target from/to=[1771,1794]	-24.50	Epoxide hydrolase 1 [Salmo salar]
ssa-miR-138-5p	contig_15039	target from/to=[2432,2452]	-24.50	PREDICTED: glycogen phosphorylase, muscle form-like [Salmo salar]
ssa-miR-199a-5p	contig_30140	target from/to=[1319,1342]	-24.50	PREDICTED: cdc42 effector protein 1-like [Salmo salar]
ssa-miR-214-5p	contig_39746	target from/to=[203,226]	-24.50	PREDICTED: cAMP-specific 3',5'-cyclic phosphodiesterase 4D-like [Salmo salar]
ssa-miR-193-3p	contig_92638	target from/to=[273,295]	-24.50	PREDICTED: acidic leucine-rich nuclear phosphoprotein 32 family member B-like isoform X1 [Salmo salar]
ssa-miR-19d-5p	contig_75	target from/to=[1217,1241]	-24.50	elongation factor 1 alpha [Salmo salar]
ssa-miR-23b-5p	contig_416	target from/to=[811,828]	-24.50	PREDICTED: uncharacterized protein LOC106562530 [Salmo salar]
ssa-miR-19d-5p	contig_860	target from/to=[2161,2185]	-24.50	Elongation factor 1-alpha, oocyte form [Salmo salar]
ssa-miR-150-3p	contig_1745	target from/to=[300,320]	-24.50	PREDICTED: zinc finger CCCH domain-containing protein 11A-like isoform X1 [Salmo salar]
ssa-miR-150-3p	contig_4150	target from/to=[1010,1030]	-24.50	not available
ssa-miR-150-3p	contig_4282	target from/to=[1535,1554]	-24.50	PREDICTED: tetratricopeptide repeat protein 7A-like isoform X2 [Salmo salar]
ssa-miR-2188-3p	contig_8543	target from/to=[1347,1367]	-24.50	U3 small nucleolar RNA-associated protein 18 homolog [Salmo salar]
ssa-miR-150-3p	contig_9557	target from/to=[2765,2788]	-24.50	PREDICTED: septin-5 isoform X2 [Salmo salar]
ssa-miR-19d-5p	contig_10358	target from/to=[3119,3141]	-24.50	PREDICTED: protein NDRG2 [Salmo salar]
ssa-miR-150-3p	contig_12727	target from/to=[2411,2431]	-24.50	PREDICTED: general transcription factor 3C polypeptide 4-like [Salmo salar]
ssa-miR-150-3p	contig_17418	target from/to=[876,898]	-24.50	PREDICTED: vascular endothelial growth factor A-A-like isoform X3 [Salmo salar]
ssa-miR-19d-5p	contig_19143	target from/to=[1006,1028]	-24.50	PREDICTED: homeobox protein cut-like 1 isoform X6 [Salmo salar]
ssa-miR-150-3p	contig_21172	target from/to=[1434,1456]	-24.50	PREDICTED: K0141 protein isoform X1 [Salmo salar]
ssa-miR-125b-1-3p	contig_25001	target from/to=[2739,2759]	-24.50	PREDICTED: zinc finger BED domain-containing protein 1-like [Salmo salar]
ssa-miR-30a-3p	contig_25278	target from/to=[697,717]	-24.50	PREDICTED: transmembrane protein 179B-like isoform X1 [Salmo salar]
ssa-miR-150-3p	contig_30492	target from/to=[764,786]	-24.50	PREDICTED: uncharacterized protein LOC106567525 isoform X1 [Salmo salar]
ssa-miR-301b-5p	contig_41132	target from/to=[2733,2754]	-24.50	PREDICTED: probable G-protein coupled receptor 52 [Salmo salar]
ssa-miR-30a-3p	contig_45449	target from/to=[657,679]	-24.50	Deoxyribonuclease gamma precursor [Salmo salar]
ssa-miR-150-3p	contig_45701	target from/to=[1748,1769]	-24.50	PREDICTED: phosphatidylinositol 3,4,5-trisphosphate-dependent Rac exchanger 1 protein-like isoform X1 [Salmo salar]
ssa-miR-19d-5p	contig_63811	target from/to=[2617,2639]	-24.50	PREDICTED: lysyl oxidase homolog 4-like [Salmo salar]
ssa-miR-150-3p	contig_64531	target from/to=[192,212]	-24.50	PREDICTED: peroxisomal membrane protein PMP34-like isoform X1 [Salmo salar]
ssa-miR-150-3p	contig_71245	target from/to=[807,827]	-24.50	PREDICTED: fibroblast growth factor 13-like isoform X2 [Salmo salar]
ssa-miR-150-3p	contig_83943	target from/to=[752,773]	-24.50	PREDICTED: uncharacterized protein C15orf41 homolog [Salmo salar]
ssa-miR-150-3p	contig_30140	target from/to=[2030,2051]	-24.50	PREDICTED: cdc42 effector protein 1-like [Salmo salar]
ssa-miR-19d-5p	contig_33642	target from/to=[625,648]	-24.50	PREDICTED: dickkopf-related protein 2 [Salmo salar]
ssa-miR-23b-5p	contig_53334	target from/to=[1131,1148]	-24.50	PREDICTED: uncharacterized protein LOC106609046 isoform X4 [Salmo salar]
ssa-miR-150-3p	contig_99505	target from/to=[1107,1126]	-24.50	PREDICTED: guanylate cyclase soluble subunit beta-1 isoform X1 [Salmo salar]
ssa-miR-214-5p	contig_331	target from/to=[1179,1199]	-24.40	PREDICTED: protein NLRC3-like [Salmo salar]
ssa-miR-21a-2-3p	contig_53451	target from/to=[1041,1061]	-24.40	not available
ssa-miR-21b-3p	contig_53451	target from/to=[1041,1061]	-24.40	not available
ssa-miR-122-5p	contig_61029	target from/to=[4273,4296]	-24.40	not available
ssa-miR-193-3p	contig_62449	target from/to=[2075,2099]	-24.40	Transposable element Tcb1 transposase [Salmo salar]
ssa-miR-206-3p	contig_95005	target from/to=[1055,1076]	-24.40	PREDICTED: protein RUFY3 isoform X3 [Salmo salar]
ssa-miR-456-5p	contig_52215	target from/to=[1887,1908]	-24.40	PREDICTED: OX-2 membrane glycoprotein [Salmo salar]
ssa-miR-30a-3p	contig_3194	target from/to=[485,505]	-24.40	ribosomal protein L12 [Salmo salar]
ssa-miR-19d-5p	contig_6762	target from/to=[605,630]	-24.40	PREDICTED: stonustoxin subunit beta-like [Salmo salar]
ssa-miR-30a-3p	contig_18667	target from/to=[216,236]	-24.40	hypothetical protein [Salmo salar]
ssa-miR-150-3p	contig_19646	target from/to=[3275,3297]	-24.40	PREDICTED: integrin alpha-3 [Salmo salar]
ssa-miR-150-3p	contig_20569	target from/to=[1282,1306]	-24.40	PREDICTED: G-protein-signaling modulator 2-like isoform X1 [Salmo salar]
ssa-miR-125b-1-3p	contig_21452	target from/to=[212,233]	-24.40	PREDICTED: sialic acid-binding Ig-like lectin 13 isoform X1 [Salmo salar]
ssa-miR-150-3p	contig_29188	target from/to=[4725,4748]	-24.40	PREDICTED: long-chain-fatty-acid--CoA ligase 4-like isoform X1 [Salmo salar]
ssa-miR-150-3p	contig_36480	target from/to=[1599,1621]	-24.40	PREDICTED: probable E3 ubiquitin-protein ligase HERC1, partial [Salmo salar]
ssa-miR-19d-5p	contig_36556	target from/to=[3167,3189]	-24.40	PREDICTED: protein TMEPAI isoform X4 [Salmo salar]
ssa-miR-150-3p	contig_39006	target from/to=[3527,3548]	-24.40	PREDICTED: uncharacterized protein LOC106568591 [Salmo salar]
ssa-miR-150-3p	contig_43271	target from/to=[247,268]	-24.40	PREDICTED: leucine-rich repeat flightless-interacting protein 1-like isoform X3 [Salmo salar]
ssa-miR-19d-5p	contig_43850	target from/to=[922,946]	-24.40	PREDICTED: uncharacterized protein LOC106605384, partial [Salmo salar]
ssa-miR-19d-5p	contig_44145	target from/to=[2545,2568]	-24.40	PREDICTED: rho GTPase-activating protein 20-like [Salmo salar]
ssa-miR-150-3p	contig_60381	target from/to=[928,949]	-24.40	PREDICTED: protein EURL homolog [Salmo salar]
ssa-miR-30a-3p	contig_66245	target from/to=[1636,1659]	-24.40	PREDICTED: aftiphilin-like [Salmo salar]
ssa-miR-30a-3p	contig_66609	target from/to=[1021,1042]	-24.40	transposase [Salmo salar]
ssa-miR-150-3p	contig_74932	target from/to=[840,864]	-24.40	PREDICTED: uncharacterized protein LOC106565892 [Salmo salar]
ssa-miR-150-3p	contig_90435	target from/to=[48,69]	-24.40	PREDICTED: tRNA:m(4)X modification enzyme TRM13 homolog isoform X1 [Salmo salar]
ssa-miR-2188-3p	contig_101884	target from/to=[55,75]	-24.40	not available
ssa-miR-150-3p	contig_34578	target from/to=[525,546]	-24.40	not available
ssa-miR-150-3p	contig_60825	target from/to=[3244,3265]	-24.40	PREDICTED: EMILIN-1-like isoform X1 [Salmo salar]
ssa-miR-19d-5p	contig_63020	target from/to=[262,284]	-24.40	PREDICTED: acetylcholine receptor subunit gamma-like isoform X3 [Salmo salar]
ssa-miR-19d-5p	contig_79009	target from/to=[787,811]	-24.40	PREDICTED: dematin isoform X5 [Salmo salar]
ssa-miR-150-3p	contig_100181	target from/to=[1109,1130]	-24.40	PREDICTED: glucagon receptor-like [Salmo salar]
ssa-miR-199a-5p	contig_4963	target from/to=[386,407]	-24.30	PREDICTED: insulin-like growth factor 2 mRNA-binding protein 3 [Salmo salar]
ssa-miR-19c-3-5p	contig_6386	target from/to=[4356,4380]	-24.30	PREDICTED: glucocorticoid receptor-like isoform X2 [Salmo salar]
ssa-miR-19c-3-5p	contig_11668	target from/to=[476,497]	-24.30	Ubiquitin-conjugating enzyme E2 R2 [Salmo salar]
ssa-miR-138-5p	contig_33006	target from/to=[1735,1756]	-24.30	PREDICTED: SH3 domain and tetratricopeptide repeat-containing protein 1-like [Salmo salar]
ssa-miR-204-5p	contig_70877	target from/to=[235,258]	-24.30	PREDICTED: membrane progestin receptor alpha-B-like isoform X2 [Salmo salar]
ssa-miR-8163-5p	contig_73050	target from/to=[7444,7467]	-24.30	PREDICTED: PR domain zinc finger protein 2-like [Salmo salar]
ssa-miR-199a-5p	contig_74211	target from/to=[28,51]	-24.30	PREDICTED: A disintegrin and metalloproteinase with thrombospondin motifs 20-like isoform X2 [Salmo salar]
ssa-miR-214-5p	contig_85808	target from/to=[506,528]	-24.30	PREDICTED: metal transporter CNNM3 isoform X2 [Salmo salar]
ssa-miR-456-5p	contig_73530	target from/to=[247,269]	-24.30	PREDICTED: desmin-like [Salmo salar]
ssa-miR-21b-5p	contig_105336	target from/to=[419,440]	-24.30	PREDICTED: perforin-1-like isoform X1 [Salmo salar]
ssa-miR-204-5p	contig_108407	target from/to=[1171,1189]	-24.30	PREDICTED: bromodomain-containing protein 1-like, partial [Salmo salar]
ssa-miR-150-3p	contig_526	target from/to=[593,615]	-24.30	PREDICTED: zinc finger protein 883-like [Salmo salar]
ssa-miR-150-3p	contig_1152	target from/to=[1067,1089]	-24.30	PREDICTED: tyrosine-protein phosphatase non-receptor type 11-like isoform X1 [Salmo salar]
ssa-miR-150-3p	contig_4216	target from/to=[895,915]	-24.30	PREDICTED: leucine-rich PPR motif-containing protein, mitochondrial [Salmo salar]
ssa-miR-19d-5p	contig_4216	target from/to=[887,912]	-24.30	PREDICTED: leucine-rich PPR motif-containing protein, mitochondrial [Salmo salar]
ssa-miR-19d-5p	contig_7080	target from/to=[1438,1459]	-24.30	PREDICTED: NUAK family SNF1-like kinase 1 [Salmo salar]
ssa-miR-2188-3p	contig_10605	target from/to=[469,489]	-24.30	PREDICTED: CD209 antigen-like protein E isoform X1 [Salmo salar]
ssa-miR-150-3p	contig_17856	target from/to=[3592,3612]	-24.30	PREDICTED: equilibrative nucleoside transporter 1 [Salmo salar]
ssa-miR-150-3p	contig_19647	target from/to=[3730,3753]	-24.30	Retrotransposable element Tf2 155 kDa protein type 3, partial [Salmo salar]
ssa-miR-150-3p	contig_19896	target from/to=[1763,1783]	-24.30	Argininosuccinate synthase [Salmo salar]
ssa-miR-150-3p	contig_20468	target from/to=[125,145]	-24.30	PREDICTED: rho GTPase-activating protein 17 isoform X3 [Salmo salar]
ssa-miR-150-3p	contig_63289	target from/to=[712,731]	-24.30	PREDICTED: fibroblast growth factor 10-like [Salmo salar]
ssa-miR-2188-3p	contig_63387	target from/to=[3709,3729]	-24.30	PREDICTED: GRAM domain-containing protein 1B-like isoform X2 [Salmo salar]
ssa-miR-150-3p	contig_78652	target from/to=[2903,2923]	-24.30	PREDICTED: protein phosphatase 1 regulatory subunit 12A-like isoform X7 [Salmo salar]
ssa-miR-150-3p	contig_138514	target from/to=[752,773]	-24.30	PREDICTED: dematin isoform X5 [Salmo salar]
ssa-miR-92b-3p	contig_169467	target from/to=[637,659]	-24.30	PREDICTED: tripartite motif-containing protein 35-like [Salmo salar]
ssa-miR-150-3p	contig_25906	target from/to=[1011,1030]	-24.30	PREDICTED: vitrin isoform X1 [Salmo salar]
ssa-miR-19d-5p	contig_34075	target from/to=[171,196]	-24.30	PREDICTED: arabinogalactan protein 1-like [Salmo salar]
ssa-miR-19d-5p	contig_34075	target from/to=[198,223]	-24.30	PREDICTED: arabinogalactan protein 1-like [Salmo salar]
ssa-miR-150-3p	contig_75293	target from/to=[1421,1445]	-24.30	PREDICTED: CTTNBP2 N-terminal-like protein [Salmo salar]
ssa-miR-150-3p	contig_88051	target from/to=[190,210]	-24.30	COL11A2, partial [Salmo salar]
ssa-miR-456-5p	contig_5906	target from/to=[753,774]	-24.20	PREDICTED: UDP-N-acetylglucosamine transporter-like isoform X3 [Salmo salar]
ssa-miR-19c-3-5p	contig_6219	target from/to=[939,961]	-24.20	PREDICTED: cytochrome b-c1 complex subunit 1, mitochondrial-like [Salmo salar]
ssa-miR-204-5p	contig_6297	target from/to=[1976,1999]	-24.20	PREDICTED: placenta-specific gene 8 protein-like isoform X1 [Salmo salar]
ssa-miR-15b-5p	contig_12324	target from/to=[949,968]	-24.20	Hydroxyacyl-coenzyme A dehydrogenase, mitochondrial precursor [Salmo salar]
ssa-miR-204-5p	contig_18279	target from/to=[2664,2688]	-24.20	PREDICTED: uncharacterized protein LOC106569460 isoform X2 [Salmo salar]
ssa-miR-365-5p	contig_19143	target from/to=[312,331]	-24.20	PREDICTED: homeobox protein cut-like 1 isoform X6 [Salmo salar]
ssa-miR-138-5p	contig_44006	target from/to=[696,718]	-24.20	PREDICTED: tRNA:m(4)X modification enzyme TRM13 homolog isoform X1 [Salmo salar]
ssa-miR-18b-5p	contig_45701	target from/to=[1279,1301]	-24.20	PREDICTED: phosphatidylinositol 3,4,5-trisphosphate-dependent Rac exchanger 1 protein-like isoform X1 [Salmo salar]
ssa-miR-29b-1-5p	contig_96891	target from/to=[1459,1479]	-24.20	PREDICTED: flotillin-2a isoform X3 [Salmo salar]
ssa-miR-138-5p	contig_144528	target from/to=[1196,1217]	-24.20	PREDICTED: uncharacterized protein LOC106562934 [Salmo salar]
ssa-miR-19d-5p	contig_2101	target from/to=[823,846]	-24.20	PREDICTED: protein NLRC3-like [Salmo salar]
ssa-miR-150-3p	contig_6573	target from/to=[1632,1655]	-24.20	PREDICTED: NF-kappa-B inhibitor alpha-like [Salmo salar]
ssa-miR-194a-5p	contig_10944	target from/to=[490,512]	-24.20	not available
ssa-miR-2188-3p	contig_11916	target from/to=[3164,3187]	-24.20	hypothetical protein, partial [Salmo salar]
ssa-miR-150-3p	contig_15096	target from/to=[3592,3613]	-24.20	PREDICTED: basement membrane-specific heparan sulfate proteoglycan core protein-like isoform X18 [Salmo salar]
ssa-miR-150-3p	contig_19910	target from/to=[1083,1105]	-24.20	Normal mucosa of esophagus-specific gene 1 protein [Salmo salar]
ssa-miR-23b-5p	contig_22619	target from/to=[9636,9656]	-24.20	PREDICTED: phosphatidylinositol 3-kinase regulatory subunit gamma-like isoform X1 [Salmo salar]
ssa-miR-23b-5p	contig_41132	target from/to=[2134,2152]	-24.20	PREDICTED: probable G-protein coupled receptor 52 [Salmo salar]
ssa-miR-23b-5p	contig_45701	target from/to=[1753,1774]	-24.20	PREDICTED: phosphatidylinositol 3,4,5-trisphosphate-dependent Rac exchanger 1 protein-like isoform X1 [Salmo salar]
ssa-miR-150-3p	contig_46399	target from/to=[1186,1206]	-24.20	PREDICTED: 4,5-dihydroxyphthalate dehydrogenase isoform X1 [Salmo salar]
ssa-miR-150-3p	contig_48651	target from/to=[1409,1432]	-24.20	PREDICTED: Krueppel-like factor 15 [Salmo salar]
ssa-miR-2188-3p	contig_49127	target from/to=[1690,1711]	-24.20	PREDICTED: FERM domain-containing protein 4A-like isoform X6 [Salmo salar]
ssa-miR-30a-3p	contig_49127	target from/to=[2440,2461]	-24.20	PREDICTED: FERM domain-containing protein 4A-like isoform X6 [Salmo salar]
ssa-miR-150-3p	contig_49127	target from/to=[3082,3103]	-24.20	PREDICTED: FERM domain-containing protein 4A-like isoform X6 [Salmo salar]
ssa-miR-30a-3p	contig_55639	target from/to=[2067,2089]	-24.20	PREDICTED: AT-rich interactive domain-containing protein 4B-like [Salmo salar]
ssa-miR-150-3p	contig_56064	target from/to=[91,112]	-24.20	PREDICTED: WD repeat-containing protein 37 isoform X2 [Salmo salar]
ssa-miR-150-3p	contig_58441	target from/to=[353,374]	-24.20	PREDICTED: spindle and kinetochore-associated protein 3 isoform X1 [Salmo salar]
ssa-miR-150-3p	contig_63289	target from/to=[171,193]	-24.20	PREDICTED: fibroblast growth factor 10-like [Salmo salar]
ssa-miR-150-3p	contig_70178	target from/to=[1665,1688]	-24.20	PREDICTED: pleckstrin homology domain-containing family A member 7-like [Salmo salar]
ssa-miR-150-3p	contig_70560	target from/to=[1162,1184]	-24.20	PREDICTED: uncharacterized protein LOC106604427 [Salmo salar]
ssa-miR-19d-5p	contig_74523	target from/to=[4318,4344]	-24.20	PREDICTED: transcription factor RFX3-like isoform X1 [Salmo salar]
ssa-miR-19d-5p	contig_77095	target from/to=[436,460]	-24.20	PREDICTED: uncharacterized protein LOC106607470 [Salmo salar]
ssa-miR-150-3p	contig_4214	target from/to=[1069,1092]	-24.20	PREDICTED: transcription factor AP-4-like isoform X2 [Salmo salar]
ssa-miR-19d-5p	contig_7629	target from/to=[645,670]	-24.20	Transposable element Tcb1 transposase [Salmo salar]
ssa-miR-92b-3p	contig_49476	target from/to=[2222,2245]	-24.20	PREDICTED: podocan-like [Salmo salar]
ssa-miR-19d-5p	contig_75688	target from/to=[1180,1201]	-24.20	PREDICTED: uncharacterized protein KIAA0408-like isoform X2 [Salmo salar]
ssa-miR-23b-5p	contig_89709	target from/to=[209,230]	-24.20	PREDICTED: tenascin-like [Salmo salar]
ssa-miR-23b-5p	contig_94190	target from/to=[2679,2697]	-24.20	PREDICTED: obscurin-like isoform X1 [Salmo salar]
ssa-miR-23b-5p	contig_98262	target from/to=[421,441]	-24.20	PREDICTED: dedicator of cytokinesis protein 4-like isoform X6 [Salmo salar]
ssa-miR-133a-3p	contig_1513	target from/to=[2251,2272]	-24.10	PREDICTED: von Willebrand factor A domain-containing protein 7-like [Salmo salar]
ssa-miR-132-3p	contig_6637	target from/to=[3135,3160]	-24.10	PREDICTED: transcription factor E2-alpha isoform X3 [Salmo salar]
ssa-miR-135b-5p	contig_6856	target from/to=[971,994]	-24.10	PREDICTED: vinculin isoform X2 [Salmo salar]
ssa-miR-8163-5p	contig_13682	target from/to=[978,1000]	-24.10	PREDICTED: vitamin D receptor isoform X1 [Salmo salar]
ssa-miR-8163-5p	contig_17036	target from/to=[767,789]	-24.10	PREDICTED: tRNA:m(4)X modification enzyme TRM13 homolog isoform X1 [Salmo salar]
ssa-miR-138-5p	contig_37743	target from/to=[42,65]	-24.10	PREDICTED: uncharacterized protein LOC106569078 [Salmo salar]
ssa-miR-26a-3-3p	contig_42693	target from/to=[454,475]	-24.10	Epoxide hydrolase 1 [Salmo salar]
ssa-miR-19c-3-5p	contig_60381	target from/to=[1474,1496]	-24.10	PREDICTED: protein EURL homolog [Salmo salar]
ssa-miR-449a-5p	contig_89192	target from/to=[322,345]	-24.10	PREDICTED: uncharacterized protein LOC106584893 isoform X1 [Salmo salar]
ssa-miR-138-5p	contig_3565	target from/to=[922,945]	-24.10	PREDICTED: TP53-regulating kinase-like [Salmo salar]
ssa-miR-138-5p	contig_30140	target from/to=[4071,4092]	-24.10	PREDICTED: cdc42 effector protein 1-like [Salmo salar]
ssa-miR-193-3p	contig_57089	target from/to=[5046,5069]	-24.10	PREDICTED: brefeldin A-inhibited guanine nucleotide-exchange protein 3 isoform X5 [Salmo salar]
ssa-miR-214-5p	contig_65388	target from/to=[1448,1470]	-24.10	PREDICTED: vacuolar protein 8-like isoform X1 [Salmo salar]
ssa-miR-19d-5p	contig_75	target from/to=[366,392]	-24.10	elongation factor 1 alpha [Salmo salar]
ssa-miR-150-3p	contig_3529	target from/to=[889,912]	-24.10	PREDICTED: keratin, type I cytoskeletal 18-like isoform X1 [Salmo salar]
ssa-miR-150-3p	contig_5392	target from/to=[2220,2241]	-24.10	PREDICTED: protein LAP2-like isoform X1 [Salmo salar]
ssa-miR-150-3p	contig_7655	target from/to=[4420,4442]	-24.10	PREDICTED: sterile alpha motif domain-containing protein 9-like [Salmo salar]
ssa-miR-150-3p	contig_17418	target from/to=[2287,2309]	-24.10	PREDICTED: vascular endothelial growth factor A-A-like isoform X3 [Salmo salar]
ssa-miR-19d-5p	contig_17804	target from/to=[171,195]	-24.10	transposase [Salmo salar]
ssa-miR-19d-5p	contig_19871	target from/to=[1041,1066]	-24.10	PREDICTED: cell division cycle-associated protein 3-like [Salmo salar]
ssa-miR-125b-1-3p	contig_30307	target from/to=[327,345]	-24.10	transposase [Salmo salar]
ssa-miR-19d-5p	contig_35985	target from/to=[406,430]	-24.10	PREDICTED: uncharacterized protein LOC106600457 [Salmo salar]
ssa-miR-30a-3p	contig_40834	target from/to=[490,512]	-24.10	PREDICTED: rho-related BTB domain-containing protein 2-like isoform X2 [Salmo salar]
ssa-miR-19d-5p	contig_44891	target from/to=[14,38]	-24.10	PREDICTED: vegetative cell wall protein gp1-like [Salmo salar]
ssa-miR-19d-5p	contig_46382	target from/to=[682,703]	-24.10	PREDICTED: ADP-ribosylation factor GTPase-activating protein 1-like isoform X1 [Salmo salar]
ssa-miR-19d-5p	contig_49741	target from/to=[314,338]	-24.10	PREDICTED: interleukin-2 receptor subunit beta-like isoform X3 [Salmo salar]
ssa-miR-150-3p	contig_55339	target from/to=[1366,1388]	-24.10	Transposable element Tc1 transposase [Salmo salar]
ssa-miR-150-3p	contig_66883	target from/to=[1789,1813]	-24.10	PREDICTED: uncharacterized protein LOC106600757 [Salmo salar]
ssa-miR-19d-5p	contig_72758	target from/to=[1616,1641]	-24.10	PREDICTED: trinucleotide repeat-containing gene 6C protein-like isoform X3 [Salmo salar]
ssa-miR-19d-5p	contig_6116	target from/to=[1560,1584]	-24.10	PREDICTED: acyl carrier protein, mitochondrial-like [Salmo salar]
ssa-miR-19d-5p	contig_14859	target from/to=[1499,1523]	-24.10	PREDICTED: calcium homeostasis endoplasmic reticulum protein isoform X1 [Salmo salar]
ssa-miR-30a-3p	contig_100911	target from/to=[1022,1042]	-24.10	PREDICTED: NCK-interacting protein with SH3 domain isoform X1 [Salmo salar]
ssa-miR-456-5p	contig_2377	target from/to=[2450,2471]	-24.00	RING1 [Salmo salar]
ssa-miR-133a-3p	contig_3293	target from/to=[346,368]	-24.00	ribosomal protein L6 [Salmo salar]
ssa-miR-338a-3-5p	contig_22364	target from/to=[430,458]	-24.00	not available
ssa-miR-133a-3p	contig_60521	target from/to=[2,23]	-24.00	not available
ssa-miR-214-5p	contig_89606	target from/to=[736,758]	-24.00	not available
ssa-miR-8163-5p	contig_150	target from/to=[2467,2487]	-24.00	PREDICTED: interferon-induced guanylate-binding protein 1-like [Salmo salar]
ssa-miR-338a-3-5p	contig_26184	target from/to=[1146,1170]	-24.00	PREDICTED: discoidin, CUB and LCCL domain-containing protein 1-like isoform X1 [Salmo salar]
ssa-miR-122-5p	contig_30095	target from/to=[428,449]	-24.00	PREDICTED: protein lifeguard 2-like isoform X1 [Salmo salar]
ssa-miR-365-5p	contig_31076	target from/to=[168,185]	-24.00	PREDICTED: EMILIN-3 [Salmo salar]
ssa-miR-200a-2-5p	contig_80978	target from/to=[358,379]	-24.00	PREDICTED: secretory phospholipase A2 receptor-like isoform X3 [Salmo salar]
ssa-miR-456-5p	contig_109388	target from/to=[1078,1097]	-24.00	PREDICTED: HEAT repeat-containing protein 1 [Salmo salar]
ssa-miR-204-5p	contig_110225	target from/to=[1226,1248]	-24.00	PREDICTED: zinc finger protein 385A-like isoform X5 [Salmo salar]
ssa-miR-150-3p	contig_3337	target from/to=[453,473]	-24.00	PREDICTED: uncharacterized protein LOC106569888, partial [Salmo salar]
ssa-miR-150-3p	contig_7110	target from/to=[1748,1770]	-24.00	PREDICTED: spindle assembly checkpoint kinase-like [Salmo salar]
ssa-miR-19d-5p	contig_7828	target from/to=[544,568]	-24.00	PREDICTED: uncharacterized protein LOC106576489 [Salmo salar]
ssa-miR-150-3p	contig_12130	target from/to=[666,688]	-24.00	PREDICTED: uncharacterized protein LOC106561506 [Salmo salar]
ssa-miR-19d-5p	contig_16072	target from/to=[962,989]	-24.00	FGF2 [Salmo salar]
ssa-miR-150-3p	contig_20114	target from/to=[1367,1391]	-24.00	PREDICTED: solute carrier family 35 member F6-like isoform X1 [Salmo salar]
ssa-miR-30a-3p	contig_20832	target from/to=[2919,2940]	-24.00	PREDICTED: transmembrane protein 56-B-like [Salmo salar]
ssa-miR-19d-5p	contig_25053	target from/to=[34,57]	-24.00	PREDICTED: tubulin alpha-1C chain isoform X3 [Salmo salar]
ssa-miR-23b-5p	contig_26399	target from/to=[1785,1804]	-24.00	PREDICTED: elongation factor G, mitochondrial isoform X1 [Salmo salar]
ssa-miR-150-3p	contig_26417	target from/to=[146,168]	-24.00	PREDICTED: zinc finger and SCAN domain-containing protein 2-like [Salmo salar]
ssa-miR-150-3p	contig_29615	target from/to=[433,453]	-24.00	PREDICTED: uncharacterized protein LOC106591608 isoform X3 [Salmo salar]
ssa-miR-30a-3p	contig_30776	target from/to=[831,853]	-24.00	PREDICTED: leukocyte elastase inhibitor-like [Salmo salar]
ssa-miR-19d-5p	contig_35942	target from/to=[5719,5742]	-24.00	PREDICTED: cysteine-rich motor neuron 1 protein-like [Salmo salar]
ssa-miR-30a-3p	contig_39961	target from/to=[53,76]	-24.00	SPATA5 [Salmo salar]
ssa-miR-150-3p	contig_44207	target from/to=[900,924]	-24.00	PREDICTED: probable helicase senataxin isoform X2 [Salmo salar]
ssa-miR-150-3p	contig_45701	target from/to=[5659,5678]	-24.00	PREDICTED: phosphatidylinositol 3,4,5-trisphosphate-dependent Rac exchanger 1 protein-like isoform X1 [Salmo salar]
ssa-miR-150-3p	contig_51677	target from/to=[1359,1381]	-24.00	PREDICTED: WD repeat-containing protein 25 isoform X1 [Salmo salar]
ssa-miR-19d-5p	contig_53322	target from/to=[280,302]	-24.00	CutA homolog precursor [Salmo salar]
ssa-miR-150-3p	contig_76441	target from/to=[262,286]	-24.00	PREDICTED: ankyrin repeat and EF-hand domain-containing protein 1-like [Salmo salar]
ssa-miR-150-3p	contig_78682	target from/to=[1300,1321]	-24.00	not available
ssa-miR-19d-5p	contig_79883	target from/to=[665,691]	-24.00	PREDICTED: ribosomal protein S6 kinase alpha-5-like isoform X3 [Salmo salar]
ssa-miR-19d-5p	contig_85733	target from/to=[2059,2080]	-24.00	PREDICTED: transcription factor MafG-like [Salmo salar]
ssa-miR-19d-5p	contig_2682	target from/to=[1087,1109]	-24.00	PREDICTED: GTPase IMAP family member 8-like [Salmo salar]
ssa-miR-23b-5p	contig_6954	target from/to=[56,76]	-24.00	PREDICTED: collagen alpha-1(XXVIII) chain-like isoform X2 [Salmo salar]
ssa-miR-150-3p	contig_19506	target from/to=[2600,2619]	-24.00	PREDICTED: A disintegrin and metalloproteinase with thrombospondin motifs 10-like [Salmo salar]
ssa-miR-19d-5p	contig_25906	target from/to=[1011,1038]	-24.00	PREDICTED: vitrin isoform X1 [Salmo salar]
ssa-miR-19d-5p	contig_31076	target from/to=[2691,2714]	-24.00	PREDICTED: EMILIN-3 [Salmo salar]
ssa-miR-150-3p	contig_81574	target from/to=[849,870]	-24.00	SPATA5 [Salmo salar]
ssa-miR-19d-5p	contig_101535	target from/to=[1022,1045]	-24.00	PREDICTED: stonin-1-like [Salmo salar]
ssa-miR-133a-3p	contig_416	target from/to=[943,964]	-23.90	PREDICTED: uncharacterized protein LOC106562530 [Salmo salar]
ssa-miR-8163-5p	contig_1676	target from/to=[624,645]	-23.90	FIP2-like [Salmo salar]
ssa-miR-21b-5p	contig_15096	target from/to=[2940,2961]	-23.90	PREDICTED: basement membrane-specific heparan sulfate proteoglycan core protein-like isoform X18 [Salmo salar]
ssa-miR-138-5p	contig_15626	target from/to=[2280,2302]	-23.90	Protein-glutamine gamma-glutamyltransferase 2 [Salmo salar]
ssa-miR-456-5p	contig_38616	target from/to=[740,762]	-23.90	PREDICTED: uncharacterized protein LOC106582063 isoform X1 [Salmo salar]
ssa-miR-204-5p	contig_47988	target from/to=[784,805]	-23.90	PREDICTED: threonine--tRNA ligase, cytoplasmic-like [Salmo salar]
ssa-miR-122-5p	contig_57200	target from/to=[2126,2146]	-23.90	PREDICTED: beta-galactoside alpha-2,6-sialyltransferase 2 [Salmo salar]
ssa-miR-133a-3p	contig_60521	target from/to=[718,737]	-23.90	not available
ssa-miR-133a-3p	contig_89606	target from/to=[738,760]	-23.90	not available
ssa-miR-19c-3-5p	contig_127946	target from/to=[141,165]	-23.90	not available
ssa-miR-133a-3p	contig_21084	target from/to=[6188,6209]	-23.90	PREDICTED: collagen alpha-1(IV) chain-like [Salmo salar]
ssa-miR-204-5p	contig_101535	target from/to=[1110,1133]	-23.90	PREDICTED: stonin-1-like [Salmo salar]
ssa-miR-21b-5p	contig_132765	target from/to=[1477,1500]	-23.90	PREDICTED: solute carrier family 12 member 2-like isoform X2 [Salmo salar]
ssa-miR-19d-5p	contig_125	target from/to=[940,963]	-23.90	collagen Type XI Alpha2 [Salmo salar]
ssa-miR-30a-3p	contig_659	target from/to=[1094,1114]	-23.90	PREDICTED: golgin subfamily B member 1-like isoform X3 [Salmo salar]
ssa-miR-222b-5p	contig_1251	target from/to=[557,578]	-23.90	PREDICTED: uncharacterized protein LOC106569078 [Salmo salar]
ssa-miR-30a-3p	contig_3337	target from/to=[5280,5301]	-23.90	PREDICTED: uncharacterized protein LOC106569888, partial [Salmo salar]
ssa-miR-150-3p	contig_5416	target from/to=[1324,1344]	-23.90	PREDICTED: fumarylacetoacetate hydrolase domain-containing protein 2-like isoform X1 [Salmo salar]
ssa-miR-30a-3p	contig_5548	target from/to=[1538,1558]	-23.90	PREDICTED: BUD13 homolog [Salmo salar]
ssa-miR-19d-5p	contig_8450	target from/to=[1125,1147]	-23.90	Transposable element Tcb1 transposase [Salmo salar]
ssa-miR-150-3p	contig_18650	target from/to=[398,421]	-23.90	PREDICTED: WD repeat-containing protein 26-like isoform X1 [Salmo salar]
ssa-miR-150-3p	contig_23640	target from/to=[1508,1531]	-23.90	PREDICTED: zinc finger CCCH domain-containing protein 13-like [Salmo salar]
ssa-miR-150-3p	contig_26967	target from/to=[676,697]	-23.90	PREDICTED: uncharacterized protein LOC106569587 [Salmo salar]
ssa-miR-30a-3p	contig_40386	target from/to=[776,798]	-23.90	G-rich sequence factor 1 [Salmo salar]
ssa-miR-150-3p	contig_42693	target from/to=[2826,2847]	-23.90	Epoxide hydrolase 1 [Salmo salar]
ssa-miR-23b-5p	contig_43672	target from/to=[1548,1566]	-23.90	PREDICTED: GTPase IMAP family member 8-like isoform X1 [Salmo salar]
ssa-miR-150-3p	contig_43850	target from/to=[825,846]	-23.90	PREDICTED: uncharacterized protein LOC106605384, partial [Salmo salar]
ssa-miR-150-3p	contig_45531	target from/to=[1406,1427]	-23.90	vacuolar protein sorting 52 [Salmo salar]
ssa-miR-125b-1-3p	contig_47484	target from/to=[829,848]	-23.90	Uridine 5-monophosphate synthase [Salmo salar]
ssa-miR-19d-5p	contig_53451	target from/to=[1287,1308]	-23.90	not available
ssa-miR-150-3p	contig_63387	target from/to=[3234,3253]	-23.90	PREDICTED: GRAM domain-containing protein 1B-like isoform X2 [Salmo salar]
ssa-miR-19d-5p	contig_66247	target from/to=[1973,1996]	-23.90	PREDICTED: collagen alpha-1(VI) chain-like [Salmo salar]
ssa-miR-19d-5p	contig_73050	target from/to=[5465,5489]	-23.90	PREDICTED: PR domain zinc finger protein 2-like [Salmo salar]
ssa-miR-19d-5p	contig_74537	target from/to=[1300,1324]	-23.90	not available
ssa-miR-150-3p	contig_84908	target from/to=[1026,1045]	-23.90	PREDICTED: X-linked retinitis pigmentosa GTPase regulator-interacting protein 1-like, partial [Salmo salar]
ssa-miR-2188-3p	contig_97644	target from/to=[402,423]	-23.90	not available
ssa-miR-19d-5p	contig_1271	target from/to=[3233,3255]	-23.90	PREDICTED: taperin-like [Salmo salar]
ssa-miR-30a-3p	contig_6746	target from/to=[516,537]	-23.90	PREDICTED: protein YIPF5-like [Salmo salar]
ssa-miR-19d-5p	contig_11849	target from/to=[102,123]	-23.90	PREDICTED: fish-egg lectin-like [Salmo salar]
ssa-miR-19d-5p	contig_19774	target from/to=[2326,2348]	-23.90	PREDICTED: laminin subunit alpha-4-like [Salmo salar]
ssa-miR-150-3p	contig_57089	target from/to=[2959,2982]	-23.90	PREDICTED: brefeldin A-inhibited guanine nucleotide-exchange protein 3 isoform X5 [Salmo salar]
ssa-miR-21b-5p	contig_8140	target from/to=[1946,1967]	-23.80	PREDICTED: pantothenate kinase 3-like isoform X1 [Salmo salar]
ssa-miR-8163-5p	contig_8564	target from/to=[1704,1725]	-23.80	collagen Type XI Alpha2 [Salmo salar]
ssa-miR-10b-5p	contig_15626	target from/to=[820,841]	-23.80	Protein-glutamine gamma-glutamyltransferase 2 [Salmo salar]
ssa-miR-214-5p	contig_33836	target from/to=[2322,2341]	-23.80	not available
ssa-miR-8163-5p	contig_45695	target from/to=[1409,1434]	-23.80	PREDICTED: uncharacterized protein LOC106564134, partial [Salmo salar]
ssa-miR-214-5p	contig_49432	target from/to=[516,536]	-23.80	PREDICTED: multidrug resistance-associated protein 5-like [Salmo salar]
ssa-miR-204-5p	contig_56652	target from/to=[50,70]	-23.80	PREDICTED: uncharacterized protein LOC106591608 isoform X3 [Salmo salar]
ssa-miR-456-5p	contig_73050	target from/to=[2419,2440]	-23.80	PREDICTED: PR domain zinc finger protein 2-like [Salmo salar]
ssa-miR-19c-3-5p	contig_73941	target from/to=[1960,1980]	-23.80	PREDICTED: intelectin [Salmo salar]
ssa-miR-449a-5p	contig_97538	target from/to=[1000,1021]	-23.80	reverse transcriptase-like protein [Salmo salar]
ssa-miR-8163-5p	contig_4509	target from/to=[2843,2863]	-23.80	PREDICTED: protein MCM10 homolog [Salmo salar]
ssa-miR-135b-5p	contig_87795	target from/to=[1048,1070]	-23.80	PREDICTED: protein odd-skipped-related 1-like [Salmo salar]
ssa-miR-92b-3p	contig_3805	target from/to=[2817,2841]	-23.80	PREDICTED: tropomyosin alpha-3 chain isoform X5 [Salmo salar]
ssa-miR-19d-5p	contig_8317	target from/to=[223,249]	-23.80	PREDICTED: sn1-specific diacylglycerol lipase alpha-like isoform X2 [Salmo salar]
ssa-miR-19d-5p	contig_14579	target from/to=[2888,2911]	-23.80	PREDICTED: semaphorin-3F-like isoform X4 [Salmo salar]
ssa-miR-19d-5p	contig_19840	target from/to=[73,99]	-23.80	PREDICTED: gastrula zinc finger protein xLCGF3.1-like [Salmo salar]
ssa-miR-19d-5p	contig_22057	target from/to=[1466,1493]	-23.80	Interferon-related developmental regulator 2 [Salmo salar]
ssa-miR-150-3p	contig_28489	target from/to=[1560,1580]	-23.80	PREDICTED: ras and Rab interactor 2-like [Salmo salar]
ssa-miR-19d-5p	contig_30469	target from/to=[1418,1440]	-23.80	PREDICTED: uncharacterized protein LOC106577159 [Salmo salar]
ssa-miR-150-3p	contig_36527	target from/to=[1090,1111]	-23.80	Myelin protein zero-like protein 2 precursor [Salmo salar]
ssa-miR-150-3p	contig_40255	target from/to=[639,664]	-23.80	PREDICTED: zinc finger CCHC domain-containing protein 9 [Salmo salar]
ssa-miR-19d-5p	contig_45701	target from/to=[2906,2928]	-23.80	PREDICTED: phosphatidylinositol 3,4,5-trisphosphate-dependent Rac exchanger 1 protein-like isoform X1 [Salmo salar]
ssa-miR-19d-5p	contig_47331	target from/to=[1175,1200]	-23.80	not available
ssa-miR-19d-5p	contig_49432	target from/to=[775,800]	-23.80	PREDICTED: multidrug resistance-associated protein 5-like [Salmo salar]
ssa-miR-150-3p	contig_54137	target from/to=[710,731]	-23.80	PREDICTED: voltage-dependent L-type calcium channel subunit beta-1-like isoform X1 [Salmo salar]
ssa-miR-150-3p	contig_65390	target from/to=[469,487]	-23.80	PREDICTED: uncharacterized protein LOC106573797, partial [Salmo salar]
ssa-miR-150-3p	contig_65697	target from/to=[316,337]	-23.80	PREDICTED: dynamin-2-like isoform X3 [Salmo salar]
ssa-miR-150-3p	contig_3735	target from/to=[2064,2086]	-23.80	PREDICTED: myosin light chain kinase, smooth muscle-like isoform X3 [Salmo salar]
ssa-miR-30a-3p	contig_16159	target from/to=[781,804]	-23.80	PREDICTED: acetyl-coenzyme A synthetase 2-like, mitochondrial [Salmo salar]
ssa-miR-19d-5p	contig_16366	target from/to=[1459,1485]	-23.80	PREDICTED: arrestin domain-containing protein 1-like isoform X1 [Salmo salar]
ssa-miR-150-3p	contig_43845	target from/to=[1615,1638]	-23.80	PREDICTED: uncharacterized protein LOC106594117 [Salmo salar]
ssa-miR-150-3p	contig_65509	target from/to=[2354,2372]	-23.80	PREDICTED: transforming growth factor beta-3-like [Salmo salar]
ssa-miR-135b-5p	contig_326	target from/to=[532,555]	-23.70	Ferritin, middle subunit [Salmo salar]
ssa-miR-135b-5p	contig_957	target from/to=[275,298]	-23.70	Ferritin, middle subunit [Salmo salar]
ssa-miR-138-5p	contig_14578	target from/to=[2471,2492]	-23.70	PREDICTED: semaphorin-3F-like isoform X1 [Salmo salar]
ssa-miR-338a-3-5p	contig_15096	target from/to=[4022,4048]	-23.70	PREDICTED: basement membrane-specific heparan sulfate proteoglycan core protein-like isoform X18 [Salmo salar]
ssa-miR-456-5p	contig_15096	target from/to=[5896,5916]	-23.70	PREDICTED: basement membrane-specific heparan sulfate proteoglycan core protein-like isoform X18 [Salmo salar]
ssa-miR-10a-5p	contig_16857	target from/to=[3493,3515]	-23.70	PREDICTED: collagen alpha-6(IV) chain-like isoform X3 [Salmo salar]
ssa-miR-138-5p	contig_18445	target from/to=[661,684]	-23.70	PREDICTED: pre-mRNA-splicing factor SLU7-like [Salmo salar]
ssa-miR-122-5p	contig_18732	target from/to=[1731,1751]	-23.70	PREDICTED: serine--tRNA ligase, mitochondrial isoform X2 [Salmo salar]
ssa-miR-456-5p	contig_21113	target from/to=[5127,5148]	-23.70	PREDICTED: E3 ubiquitin-protein ligase CBL isoform X1 [Salmo salar]
ssa-miR-8163-5p	contig_29140	target from/to=[954,977]	-23.70	PREDICTED: transcription factor E3-like [Salmo salar]
ssa-miR-133b-3p	contig_60521	target from/to=[716,738]	-23.70	not available
ssa-miR-133a-3p	contig_75571	target from/to=[1200,1221]	-23.70	PREDICTED: uncharacterized protein LOC106565305 [Salmo salar]
ssa-miR-29b-1-5p	contig_94564	target from/to=[996,1018]	-23.70	olfactory receptor family C subfamily 4 member 9 [Salmo salar]
ssa-miR-19c-3-5p	contig_116449	target from/to=[243,266]	-23.70	PREDICTED: T-cell surface antigen CD2-like isoform X1 [Salmo salar]
ssa-miR-138-5p	contig_359	target from/to=[1572,1592]	-23.70	PREDICTED: cold shock domain-containing protein C2-like [Salmo salar]
ssa-miR-8163-5p	contig_30140	target from/to=[2410,2434]	-23.70	PREDICTED: cdc42 effector protein 1-like [Salmo salar]
ssa-miR-19d-5p	contig_936	target from/to=[1286,1306]	-23.70	PREDICTED: serine protease 27-like [Salmo salar]
ssa-miR-150-3p	contig_2569	target from/to=[2249,2270]	-23.70	PREDICTED: exocyst complex component 3-like [Salmo salar]
ssa-miR-19d-5p	contig_7358	target from/to=[2628,2651]	-23.70	PREDICTED: LIM domain and actin-binding protein 1-like isoform X1 [Salmo salar]
ssa-miR-150-3p	contig_8120	target from/to=[2528,2549]	-23.70	transposase [Salmo salar]
ssa-miR-150-3p	contig_10837	target from/to=[2411,2435]	-23.70	PREDICTED: roquin-1-like isoform X1 [Salmo salar]
ssa-miR-150-3p	contig_14578	target from/to=[3338,3360]	-23.70	PREDICTED: semaphorin-3F-like isoform X1 [Salmo salar]
ssa-miR-19d-5p	contig_15422	target from/to=[839,860]	-23.70	collagen Type XI Alpha2 [Salmo salar]
ssa-miR-19d-5p	contig_18254	target from/to=[139,165]	-23.70	PREDICTED: acidic leucine-rich nuclear phosphoprotein 32 family member B-like isoform X1 [Salmo salar]
ssa-miR-19d-5p	contig_20832	target from/to=[893,918]	-23.70	PREDICTED: transmembrane protein 56-B-like [Salmo salar]
ssa-miR-19d-5p	contig_26207	target from/to=[3504,3527]	-23.70	PREDICTED: collagen alpha-6(IV) chain-like isoform X4 [Salmo salar]
ssa-miR-150-3p	contig_28380	target from/to=[1179,1201]	-23.70	PREDICTED: zinc finger MYND domain-containing protein 11 isoform X4 [Salmo salar]
ssa-miR-19d-5p	contig_30620	target from/to=[2633,2657]	-23.70	PREDICTED: solute carrier family 12 member 7-like isoform X4 [Salmo salar]
ssa-miR-150-3p	contig_32296	target from/to=[342,366]	-23.70	PREDICTED: UDP-N-acetylglucosamine transporter-like isoform X1 [Salmo salar]
ssa-miR-150-3p	contig_35324	target from/to=[1566,1586]	-23.70	PREDICTED: lariat debranching enzyme isoform X1 [Salmo salar]
ssa-miR-150-3p	contig_35604	target from/to=[781,802]	-23.70	tubulin tyrosine ligase-like family member 6a [Salmo salar]
ssa-miR-150-3p	contig_40683	target from/to=[775,795]	-23.70	PREDICTED: SNARE-associated protein Snapin-like isoform X2 [Salmo salar]
ssa-miR-19d-5p	contig_41132	target from/to=[3080,3099]	-23.70	PREDICTED: probable G-protein coupled receptor 52 [Salmo salar]
ssa-miR-19d-5p	contig_42254	target from/to=[1154,1179]	-23.70	PREDICTED: uncharacterized protein LOC106575121 [Salmo salar]
ssa-miR-150-3p	contig_44115	target from/to=[90,113]	-23.70	PREDICTED: uncharacterized protein LOC106578354 [Salmo salar]
ssa-miR-23b-5p	contig_48194	target from/to=[364,384]	-23.70	PREDICTED: uncharacterized protein LOC106600457 [Salmo salar]
ssa-miR-19d-5p	contig_54557	target from/to=[1101,1127]	-23.70	PREDICTED: uncharacterized protein LOC106612183 isoform X1 [Salmo salar]
ssa-miR-150-3p	contig_57370	target from/to=[546,564]	-23.70	reverse transcriptase-like protein [Salmo salar]
ssa-miR-19d-5p	contig_64556	target from/to=[513,537]	-23.70	PREDICTED: rho-related BTB domain-containing protein 2-like isoform X2 [Salmo salar]
ssa-miR-19d-5p	contig_71933	target from/to=[231,253]	-23.70	PREDICTED: nicotinate-nucleotide pyrophosphorylase [carboxylating]-like isoform X1 [Salmo salar]
ssa-miR-150-3p	contig_74211	target from/to=[73,99]	-23.70	PREDICTED: A disintegrin and metalloproteinase with thrombospondin motifs 20-like isoform X2 [Salmo salar]
ssa-miR-150-3p	contig_77087	target from/to=[584,606]	-23.70	PREDICTED: glutenin, high molecular weight subunit DY10-like isoform X1 [Salmo salar]
ssa-miR-150-3p	contig_84413	target from/to=[1216,1238]	-23.70	NFAT5a2 [Salmo salar]
ssa-miR-150-3p	contig_91964	target from/to=[1556,1575]	-23.70	not available
ssa-miR-92b-3p	contig_104847	target from/to=[926,946]	-23.70	not available
ssa-miR-19d-5p	contig_111227	target from/to=[422,447]	-23.70	PREDICTED: probable GH family 25 lysozyme 3, partial [Salmo salar]
ssa-miR-30a-3p	contig_203272	target from/to=[598,620]	-23.70	MAP kinase-activated protein kinase 3 [Salmo salar]
ssa-miR-150-3p	contig_5064	target from/to=[2659,2680]	-23.70	PREDICTED: matrix metalloproteinase-15-like [Salmo salar]
ssa-miR-150-3p	contig_6116	target from/to=[2301,2323]	-23.70	PREDICTED: acyl carrier protein, mitochondrial-like [Salmo salar]
ssa-miR-150-3p	contig_11568	target from/to=[147,168]	-23.70	PREDICTED: uncharacterized protein LOC106609103 isoform X4 [Salmo salar]
ssa-miR-30a-3p	contig_15998	target from/to=[958,979]	-23.70	PREDICTED: PAB-dependent poly(A)-specific ribonuclease subunit PAN2 [Salmo salar]
ssa-miR-150-3p	contig_32801	target from/to=[2099,2122]	-23.70	PREDICTED: synemin [Salmo salar]
ssa-miR-150-3p	contig_74525	target from/to=[1476,1497]	-23.70	PREDICTED: volume-regulated anion channel subunit LRRC8C-like [Salmo salar]
ssa-miR-150-3p	contig_98107	target from/to=[263,283]	-23.70	PREDICTED: Kv channel-interacting protein 4-like, partial [Salmo salar]
ssa-miR-19d-5p	contig_139413	target from/to=[1573,1593]	-23.70	PREDICTED: SH2 domain-containing adapter protein E [Salmo salar]
ssa-miR-138-5p	contig_6898	target from/to=[275,298]	-23.60	PREDICTED: sodium-coupled neutral amino acid transporter 3-like isoform X2 [Salmo salar]
ssa-miR-214-5p	contig_8072	target from/to=[934,954]	-23.60	Stromal cell-derived factor 2-like protein 1 precursor [Salmo salar]
ssa-miR-204-5p	contig_12934	target from/to=[3006,3028]	-23.60	PREDICTED: transcription factor 7-like 2 isoform X30 [Salmo salar]
ssa-miR-133b-3p	contig_16764	target from/to=[45,66]	-23.60	PREDICTED: uncharacterized protein LOC106611372 [Salmo salar]
ssa-miR-138-5p	contig_21144	target from/to=[432,455]	-23.60	PREDICTED: uncharacterized protein LOC106575220 isoform X1 [Salmo salar]
ssa-miR-27d-5p	contig_39744	target from/to=[440,460]	-23.60	PREDICTED: zinc finger protein 239-like isoform X3 [Salmo salar]
ssa-miR-214-5p	contig_51728	target from/to=[1192,1211]	-23.60	PREDICTED: DNA-binding protein RFX5-like isoform X2 [Salmo salar]
ssa-miR-365-5p	contig_57370	target from/to=[1329,1348]	-23.60	reverse transcriptase-like protein [Salmo salar]
ssa-miR-199a-5p	contig_61543	target from/to=[4055,4077]	-23.60	PREDICTED: apolipoprotein B-100 isoform X3 [Salmo salar]
ssa-miR-214-5p	contig_83628	target from/to=[1355,1379]	-23.60	PREDICTED: methyl-CpG-binding domain protein 4-like [Salmo salar]
ssa-miR-138-5p	contig_5064	target from/to=[1209,1230]	-23.60	PREDICTED: matrix metalloproteinase-15-like [Salmo salar]
ssa-miR-8163-5p	contig_30140	target from/to=[1435,1457]	-23.60	PREDICTED: cdc42 effector protein 1-like [Salmo salar]
ssa-miR-456-5p	contig_43877	target from/to=[1996,2017]	-23.60	PREDICTED: M-protein, striated muscle-like isoform X1 [Salmo salar]
ssa-miR-8163-5p	contig_109200	target from/to=[1750,1773]	-23.60	PREDICTED: sodium bicarbonate transporter-like protein 11 isoform X2 [Salmo salar]
ssa-miR-30a-3p	contig_659	target from/to=[3652,3671]	-23.60	PREDICTED: golgin subfamily B member 1-like isoform X3 [Salmo salar]
ssa-miR-125b-1-3p	contig_1410	target from/to=[845,862]	-23.60	PREDICTED: epithelial cell adhesion molecule isoform X1 [Salmo salar]
ssa-miR-150-3p	contig_1513	target from/to=[1052,1073]	-23.60	PREDICTED: von Willebrand factor A domain-containing protein 7-like [Salmo salar]
ssa-miR-150-3p	contig_6386	target from/to=[3342,3365]	-23.60	PREDICTED: glucocorticoid receptor-like isoform X2 [Salmo salar]
ssa-miR-19d-5p	contig_7080	target from/to=[2097,2121]	-23.60	PREDICTED: NUAK family SNF1-like kinase 1 [Salmo salar]
ssa-miR-19d-5p	contig_7114	target from/to=[686,710]	-23.60	PREDICTED: uncharacterized protein LOC106600457 [Salmo salar]
ssa-miR-150-3p	contig_12593	target from/to=[2114,2134]	-23.60	PREDICTED: uncharacterized protein LOC106609103 isoform X4 [Salmo salar]
ssa-miR-150-3p	contig_13900	target from/to=[396,415]	-23.60	PREDICTED: GRIP domain-containing protein RUD3-like, partial [Salmo salar]
ssa-miR-19d-5p	contig_21113	target from/to=[5506,5531]	-23.60	PREDICTED: E3 ubiquitin-protein ligase CBL isoform X1 [Salmo salar]
ssa-miR-150-3p	contig_21923	target from/to=[5937,5958]	-23.60	PREDICTED: nck-associated protein 5 isoform X1 [Salmo salar]
ssa-miR-19d-5p	contig_23500	target from/to=[96,119]	-23.60	PREDICTED: DNA-directed RNA polymerase III subunit RPC4-like isoform X2 [Salmo salar]
ssa-miR-30a-3p	contig_29439	target from/to=[2545,2565]	-23.60	PREDICTED: stAR-related lipid transfer protein 13-like isoform X1 [Salmo salar]
ssa-miR-19d-5p	contig_31250	target from/to=[2149,2175]	-23.60	PREDICTED: glutamyl-tRNA(Gln) amidotransferase subunit A, mitochondrial [Salmo salar]
ssa-miR-150-3p	contig_37743	target from/to=[204,223]	-23.60	PREDICTED: uncharacterized protein LOC106569078 [Salmo salar]
ssa-miR-30a-3p	contig_45701	target from/to=[4532,4553]	-23.60	PREDICTED: phosphatidylinositol 3,4,5-trisphosphate-dependent Rac exchanger 1 protein-like isoform X1 [Salmo salar]
ssa-miR-150-3p	contig_47484	target from/to=[1492,1513]	-23.60	Uridine 5-monophosphate synthase [Salmo salar]
ssa-miR-19d-5p	contig_47670	target from/to=[789,812]	-23.60	not available
ssa-miR-150-3p	contig_53629	target from/to=[432,455]	-23.60	PREDICTED: uncharacterized protein LOC106600544 isoform X2 [Salmo salar]
ssa-miR-23b-5p	contig_57016	target from/to=[1836,1857]	-23.60	collagen Type XI Alpha2 [Salmo salar]
ssa-miR-23b-5p	contig_62227	target from/to=[427,449]	-23.60	PREDICTED: rho GTPase-activating protein 31 [Salmo salar]
ssa-miR-23b-5p	contig_66075	target from/to=[443,462]	-23.60	PREDICTED: far upstream element-binding protein 3-like isoform X4 [Salmo salar]
ssa-miR-150-3p	contig_79566	target from/to=[548,568]	-23.60	PREDICTED: SH3 and PX domain-containing protein 2B isoform X4 [Salmo salar]
ssa-miR-19d-5p	contig_83485	target from/to=[70,93]	-23.60	ORF2 protein [Salmo salar]
ssa-miR-19d-5p	contig_93053	target from/to=[1113,1137]	-23.60	PREDICTED: extracellular calcium-sensing receptor-like [Salmo salar]
ssa-miR-150-3p	contig_98796	target from/to=[1043,1062]	-23.60	Serine/threonine-protein kinase 35 [Salmo salar]
ssa-miR-150-3p	contig_123127	target from/to=[264,285]	-23.60	PREDICTED: uncharacterized protein LOC106560634 isoform X2 [Salmo salar]
ssa-miR-150-3p	contig_13324	target from/to=[1002,1024]	-23.60	PREDICTED: uncharacterized protein LOC106612744 [Salmo salar]
ssa-miR-2188-3p	contig_20337	target from/to=[5140,5161]	-23.60	PREDICTED: zinc finger CCHC domain-containing protein 24 [Salmo salar]
ssa-miR-125b-1-3p	contig_33642	target from/to=[623,642]	-23.60	PREDICTED: dickkopf-related protein 2 [Salmo salar]
ssa-miR-19d-5p	contig_118448	target from/to=[626,650]	-23.60	PREDICTED: synaptophysin-like protein 1 [Salmo salar]
ssa-miR-30a-3p	contig_156217	target from/to=[320,343]	-23.60	PREDICTED: allograft inflammatory factor 1-like isoform X1 [Salmo salar]
ssa-miR-138-5p	contig_2397	target from/to=[1088,1114]	-23.50	ribosomal protein SA [Salmo salar]
ssa-miR-200a-2-5p	contig_4320	target from/to=[1251,1272]	-23.50	PREDICTED: keratin, type I cytoskeletal 13-like, partial [Salmo salar]
ssa-miR-301c-5p	contig_9991	target from/to=[2124,2144]	-23.50	PREDICTED: IST1 homolog [Salmo salar]
ssa-miR-214-5p	contig_12360	target from/to=[292,312]	-23.50	hypothetical protein [Salmo salar]
ssa-miR-19c-3-5p	contig_13985	target from/to=[1209,1232]	-23.50	PREDICTED: LOW QUALITY PROTEIN: integrin alpha-L-like [Salmo salar]
ssa-miR-8163-5p	contig_21113	target from/to=[1494,1519]	-23.50	PREDICTED: E3 ubiquitin-protein ligase CBL isoform X1 [Salmo salar]
ssa-miR-199a-5p	contig_26496	target from/to=[3368,3391]	-23.50	PREDICTED: sterile alpha motif domain-containing protein 9-like [Salmo salar]
ssa-miR-199a-3p	contig_39006	target from/to=[4111,4131]	-23.50	PREDICTED: uncharacterized protein LOC106568591 [Salmo salar]
ssa-miR-138-5p	contig_40322	target from/to=[3705,3729]	-23.50	Transposable element Tcb1 transposase [Salmo salar]
ssa-miR-199a-5p	contig_82576	target from/to=[642,662]	-23.50	PREDICTED: DNA repair protein RAD52 homolog [Salmo salar]
ssa-miR-133a-3p	contig_86166	target from/to=[1451,1469]	-23.50	PREDICTED: roquin-1-like isoform X1 [Salmo salar]
ssa-miR-8163-5p	contig_97538	target from/to=[1271,1293]	-23.50	reverse transcriptase-like protein [Salmo salar]
ssa-miR-138-5p	contig_4837	target from/to=[799,824]	-23.50	PREDICTED: protein Hook homolog 2-like isoform X4 [Salmo salar]
ssa-miR-365-5p	contig_78167	target from/to=[1436,1455]	-23.50	PREDICTED: endosialin-like [Salmo salar]
ssa-miR-125b-1-3p	contig_3529	target from/to=[1453,1473]	-23.50	PREDICTED: keratin, type I cytoskeletal 18-like isoform X1 [Salmo salar]
ssa-miR-19d-5p	contig_17458	target from/to=[1283,1308]	-23.50	PREDICTED: SEC14-like protein 2 [Salmo salar]
ssa-miR-150-3p	contig_18677	target from/to=[892,912]	-23.50	PREDICTED: ribonuclease-like 3, partial [Salmo salar]
ssa-miR-19d-5p	contig_23669	target from/to=[755,776]	-23.50	PREDICTED: fibroblast growth factor receptor-like 1 [Salmo salar]
ssa-miR-19d-5p	contig_30776	target from/to=[931,954]	-23.50	PREDICTED: leukocyte elastase inhibitor-like [Salmo salar]
ssa-miR-92b-3p	contig_33836	target from/to=[2314,2337]	-23.50	not available
ssa-miR-150-3p	contig_37230	target from/to=[504,526]	-23.50	PREDICTED: receptor-type tyrosine-protein phosphatase alpha-like isoform X1 [Salmo salar]
ssa-miR-150-3p	contig_40526	target from/to=[2015,2036]	-23.50	PREDICTED: uncharacterized protein LOC106572570 [Salmo salar]
ssa-miR-19d-5p	contig_42247	target from/to=[2133,2160]	-23.50	PREDICTED: protein FAM83H-like isoform X2 [Salmo salar]
ssa-miR-23b-5p	contig_48333	target from/to=[1287,1307]	-23.50	PREDICTED: zinc finger and BTB domain-containing protein 17 isoform X1 [Salmo salar]
ssa-miR-150-3p	contig_61487	target from/to=[1535,1556]	-23.50	PREDICTED: proenkephalin-A-like [Salmo salar]
ssa-miR-19d-5p	contig_68639	target from/to=[140,164]	-23.50	PREDICTED: calcium/calmodulin-dependent protein kinase type II subunit beta isoform X29 [Salmo salar]
ssa-miR-19d-5p	contig_74537	target from/to=[1487,1509]	-23.50	not available
ssa-miR-150-3p	contig_109047	target from/to=[48,69]	-23.50	UPF0527 membrane protein [Salmo salar]
ssa-miR-2188-3p	contig_169467	target from/to=[487,511]	-23.50	PREDICTED: tripartite motif-containing protein 35-like [Salmo salar]
ssa-miR-150-3p	contig_5582	target from/to=[1262,1283]	-23.50	PREDICTED: ATP-sensitive inward rectifier potassium channel 1-like [Salmo salar]
ssa-miR-23b-5p	contig_7680	target from/to=[572,590]	-23.50	PREDICTED: collagen alpha-1(XXIII) chain-like isoform X7 [Salmo salar]
ssa-miR-150-3p	contig_19894	target from/to=[1736,1759]	-23.50	PREDICTED: alkaline phosphatase [Salmo salar]
ssa-miR-150-3p	contig_40076	target from/to=[2502,2522]	-23.50	PREDICTED: ras-like protein family member 12 isoform X2 [Salmo salar]
ssa-miR-150-3p	contig_72310	target from/to=[58,82]	-23.50	PREDICTED: tau-tubulin kinase 2-like isoform X1 [Salmo salar]
ssa-miR-30a-3p	contig_94190	target from/to=[3293,3316]	-23.50	PREDICTED: obscurin-like isoform X1 [Salmo salar]
ssa-miR-19d-5p	contig_99446	target from/to=[1293,1315]	-23.50	PREDICTED: clathrin heavy chain 1-like isoform X1 [Salmo salar]
ssa-miR-222b-5p	contig_126807	target from/to=[194,217]	-23.50	PREDICTED: short-chain dehydrogenase/reductase 3-like [Salmo salar]
ssa-miR-365-5p	contig_3527	target from/to=[483,502]	-23.40	PREDICTED: keratin, type I cytoskeletal 18-like [Salmo salar]
ssa-miR-106b-5p	contig_6113	target from/to=[439,460]	-23.40	tubulin tyrosine ligase-like family member 6a [Salmo salar]
ssa-miR-17-5p	contig_6113	target from/to=[438,460]	-23.40	tubulin tyrosine ligase-like family member 6a [Salmo salar]
ssa-miR-193-3p	contig_6240	target from/to=[286,308]	-23.40	PREDICTED: centrosomal protein of 97 kDa isoform X2 [Salmo salar]
ssa-miR-138-5p	contig_7598	target from/to=[1232,1254]	-23.40	3-ketoacyl-CoA thiolase, mitochondrial [Salmo salar]
ssa-miR-206-3p	contig_9374	target from/to=[31,50]	-23.40	PREDICTED: keratin, type I cytoskeletal 13-like [Salmo salar]
ssa-miR-193-3p	contig_27113	target from/to=[10,34]	-23.40	Transposable element Tcb1 transposase [Salmo salar]
ssa-miR-214-5p	contig_29009	target from/to=[6,26]	-23.40	PREDICTED: protein FAM134C-like [Salmo salar]
ssa-miR-365-5p	contig_40386	target from/to=[486,503]	-23.40	G-rich sequence factor 1 [Salmo salar]
ssa-miR-138-5p	contig_42247	target from/to=[1692,1716]	-23.40	PREDICTED: protein FAM83H-like isoform X2 [Salmo salar]
ssa-miR-204-5p	contig_44211	target from/to=[2175,2196]	-23.40	PREDICTED: uncharacterized protein LOC106567027 [Salmo salar]
ssa-miR-206-3p	contig_48140	target from/to=[34,53]	-23.40	not available
ssa-miR-193-3p	contig_49419	target from/to=[379,402]	-23.40	PREDICTED: LOW QUALITY PROTEIN: protein FAM171A1, partial [Salmo salar]
ssa-miR-21b-5p	contig_54166	target from/to=[398,420]	-23.40	PREDICTED: aftiphilin-like [Salmo salar]
ssa-miR-135b-5p	contig_55580	target from/to=[607,630]	-23.40	PREDICTED: glutenin, high molecular weight subunit DY10-like isoform X1 [Salmo salar]
ssa-miR-8163-5p	contig_62301	target from/to=[4739,4763]	-23.40	PREDICTED: A disintegrin and metalloproteinase with thrombospondin motifs 9-like [Salmo salar]
ssa-miR-338a-3-5p	contig_99216	target from/to=[300,327]	-23.40	not available
ssa-miR-214-5p	contig_6071	target from/to=[899,919]	-23.40	PREDICTED: UDP-glucose 6-dehydrogenase-like [Salmo salar]
ssa-miR-21b-3p	contig_31076	target from/to=[4480,4501]	-23.40	PREDICTED: EMILIN-3 [Salmo salar]
ssa-miR-21b-5p	contig_32366	target from/to=[1439,1461]	-23.40	PREDICTED: uncharacterized protein LOC106597293 [Salmo salar]
ssa-miR-150-3p	contig_62	target from/to=[725,747]	-23.40	PREDICTED: uncharacterized protein LOC106590369 [Salmo salar]
ssa-miR-150-3p	contig_250	target from/to=[293,315]	-23.40	PREDICTED: apolipoprotein Eb-like [Salmo salar]
ssa-miR-150-3p	contig_442	target from/to=[1301,1324]	-23.40	PREDICTED: transcriptional enhancer factor TEF-1 isoform X8 [Salmo salar]
ssa-miR-2188-3p	contig_2999	target from/to=[1944,1965]	-23.40	Major vault protein [Salmo salar]
ssa-miR-30a-3p	contig_10787	target from/to=[2588,2610]	-23.40	PREDICTED: uncharacterized protein LOC106576475 [Salmo salar]
ssa-miR-19d-5p	contig_14578	target from/to=[2723,2746]	-23.40	PREDICTED: semaphorin-3F-like isoform X1 [Salmo salar]
ssa-miR-23b-5p	contig_16857	target from/to=[5707,5728]	-23.40	PREDICTED: collagen alpha-6(IV) chain-like isoform X3 [Salmo salar]
ssa-miR-23b-5p	contig_17458	target from/to=[2420,2439]	-23.40	PREDICTED: SEC14-like protein 2 [Salmo salar]
ssa-miR-19d-5p	contig_19646	target from/to=[1851,1874]	-23.40	PREDICTED: integrin alpha-3 [Salmo salar]
ssa-miR-150-3p	contig_19956	target from/to=[3685,3705]	-23.40	PREDICTED: haptoglobin-like [Salmo salar]
ssa-miR-19d-5p	contig_30505	target from/to=[381,406]	-23.40	PREDICTED: uncharacterized protein LOC106605384, partial [Salmo salar]
ssa-miR-150-3p	contig_31764	target from/to=[3279,3301]	-23.40	PREDICTED: rho guanine nucleotide exchange factor 25-like isoform X1 [Salmo salar]
ssa-miR-2188-3p	contig_31764	target from/to=[4385,4407]	-23.40	PREDICTED: rho guanine nucleotide exchange factor 25-like isoform X1 [Salmo salar]
ssa-miR-23b-5p	contig_36480	target from/to=[2731,2750]	-23.40	PREDICTED: probable E3 ubiquitin-protein ligase HERC1, partial [Salmo salar]
ssa-miR-150-3p	contig_37743	target from/to=[774,799]	-23.40	PREDICTED: uncharacterized protein LOC106569078 [Salmo salar]
ssa-miR-23b-5p	contig_43666	target from/to=[2546,2565]	-23.40	not available
ssa-miR-19d-5p	contig_61161	target from/to=[859,882]	-23.40	PREDICTED: telomere length regulation protein TEL2 homolog isoform X2 [Salmo salar]
ssa-miR-19d-5p	contig_61473	target from/to=[497,519]	-23.40	PREDICTED: ryanodine receptor 3-like isoform X4 [Salmo salar]
ssa-miR-23b-5p	contig_102712	target from/to=[430,449]	-23.40	PREDICTED: hormone-sensitive lipase-like isoform X1 [Salmo salar]
ssa-miR-150-3p	contig_104624	target from/to=[233,251]	-23.40	PREDICTED: brefeldin A-inhibited guanine nucleotide-exchange protein 2-like [Salmo salar]
ssa-miR-150-3p	contig_109758	target from/to=[363,385]	-23.40	Transposable element Tc1 transposase [Salmo salar]
ssa-miR-150-3p	contig_31076	target from/to=[3204,3223]	-23.40	PREDICTED: EMILIN-3 [Salmo salar]
ssa-miR-30a-3p	contig_41523	target from/to=[1350,1373]	-23.40	PREDICTED: heat shock 70 kDa protein 12B-like [Salmo salar]
ssa-miR-19d-5p	contig_50283	target from/to=[625,648]	-23.40	Transposable element Tcb1 transposase [Salmo salar]
ssa-miR-19d-5p	contig_72645	target from/to=[611,637]	-23.40	PREDICTED: purine nucleoside phosphorylase-like isoform X1 [Salmo salar]
ssa-miR-301b-5p	contig_101535	target from/to=[475,496]	-23.40	PREDICTED: stonin-1-like [Salmo salar]
ssa-miR-138-5p	contig_27297	target from/to=[636,660]	-23.32	Beta-microseminoprotein precursor [Salmo salar]
ssa-miR-133a-3p	contig_1185	target from/to=[2418,2438]	-23.30	PREDICTED: tropomyosin alpha-1 chain-like, partial [Salmo salar]
ssa-miR-122-5p	contig_7500	target from/to=[383,404]	-23.30	Transposable element Tcb1 transposase [Salmo salar]
ssa-miR-200a-2-5p	contig_8140	target from/to=[1306,1327]	-23.30	PREDICTED: pantothenate kinase 3-like isoform X1 [Salmo salar]
ssa-miR-19c-3-5p	contig_12593	target from/to=[1401,1423]	-23.30	PREDICTED: uncharacterized protein LOC106609103 isoform X4 [Salmo salar]
ssa-miR-204-5p	contig_15528	target from/to=[518,539]	-23.30	PREDICTED: zinc finger and BTB domain-containing protein 34-like [Salmo salar]
ssa-miR-214-5p	contig_15626	target from/to=[1843,1861]	-23.30	Protein-glutamine gamma-glutamyltransferase 2 [Salmo salar]
ssa-miR-133b-3p	contig_21247	target from/to=[896,920]	-23.30	KIAA0141 [Salmo salar]
ssa-miR-133a-3p	contig_34497	target from/to=[542,564]	-23.30	ORF2 protein [Salmo salar]
ssa-miR-138-5p	contig_69039	target from/to=[1779,1799]	-23.30	PREDICTED: mitochondrial carrier homolog 1-like isoform X2 [Salmo salar]
ssa-miR-2184-3p	contig_69319	target from/to=[1321,1342]	-23.30	PREDICTED: uncharacterized aarF domain-containing protein kinase 1 isoform X1 [Salmo salar]
ssa-miR-214-5p	contig_69548	target from/to=[190,209]	-23.30	PREDICTED: growth factor receptor-bound protein 7-like [Salmo salar]
ssa-miR-193-3p	contig_90221	target from/to=[248,271]	-23.30	PREDICTED: glucagon receptor-like [Salmo salar]
ssa-miR-199a-5p	contig_9652	target from/to=[648,671]	-23.30	PREDICTED: CB055 protein isoform X3 [Salmo salar]
ssa-miR-204-5p	contig_12275	target from/to=[1589,1611]	-23.30	PREDICTED: hyaluronidase-4-like [Salmo salar]
ssa-miR-21b-5p	contig_185109	target from/to=[342,362]	-23.30	PREDICTED: coiled-coil domain-containing protein 122-like [Salmo salar]
ssa-miR-19d-5p	contig_526	target from/to=[188,210]	-23.30	PREDICTED: zinc finger protein 883-like [Salmo salar]
ssa-miR-19d-5p	contig_593	target from/to=[5049,5070]	-23.30	PREDICTED: uncharacterized protein LOC106565227 [Salmo salar]
ssa-miR-150-3p	contig_4216	target from/to=[4010,4029]	-23.30	PREDICTED: leucine-rich PPR motif-containing protein, mitochondrial [Salmo salar]
ssa-miR-19d-5p	contig_7599	target from/to=[635,658]	-23.30	PREDICTED: MARVEL domain-containing protein 3-like isoform X2 [Salmo salar]
ssa-miR-19d-5p	contig_8187	target from/to=[863,889]	-23.30	PREDICTED: acyl-coenzyme A thioesterase 1-like [Salmo salar]
ssa-miR-30a-3p	contig_9431	target from/to=[177,197]	-23.30	MHC class I, partial [Salmo salar]
ssa-miR-19d-5p	contig_12934	target from/to=[1079,1104]	-23.30	PREDICTED: transcription factor 7-like 2 isoform X30 [Salmo salar]
ssa-miR-125b-1-3p	contig_14847	target from/to=[108,127]	-23.30	PREDICTED: centrosomal protein of 63 kDa [Salmo salar]
ssa-miR-150-3p	contig_15151	target from/to=[3675,3694]	-23.30	PREDICTED: uncharacterized protein LOC106597293 [Salmo salar]
ssa-miR-23b-5p	contig_15627	target from/to=[1277,1296]	-23.30	PREDICTED: protein-glutamine gamma-glutamyltransferase 2-like [Salmo salar]
ssa-miR-23b-5p	contig_19646	target from/to=[1663,1682]	-23.30	PREDICTED: integrin alpha-3 [Salmo salar]
ssa-miR-150-3p	contig_21247	target from/to=[1239,1259]	-23.30	KIAA0141 [Salmo salar]
ssa-miR-19d-5p	contig_21884	target from/to=[467,490]	-23.30	Transposable element Tcb1 transposase [Salmo salar]
ssa-miR-30a-3p	contig_24468	target from/to=[988,1013]	-23.30	PREDICTED: extracellular serine/threonine protein kinase FAM20C-like [Salmo salar]
ssa-miR-150-3p	contig_25533	target from/to=[1195,1218]	-23.30	PREDICTED: thyroid hormone receptor alpha [Salmo salar]
ssa-miR-19d-5p	contig_25913	target from/to=[597,619]	-23.30	not available
ssa-miR-150-3p	contig_30492	target from/to=[1711,1732]	-23.30	PREDICTED: uncharacterized protein LOC106567525 isoform X1 [Salmo salar]
ssa-miR-19d-5p	contig_31764	target from/to=[2737,2759]	-23.30	PREDICTED: rho guanine nucleotide exchange factor 25-like isoform X1 [Salmo salar]
ssa-miR-30a-3p	contig_40386	target from/to=[445,468]	-23.30	G-rich sequence factor 1 [Salmo salar]
ssa-miR-222b-5p	contig_48043	target from/to=[958,979]	-23.30	PREDICTED: cysteine-rich protein 2-binding protein-like [Salmo salar]
ssa-miR-19d-5p	contig_56957	target from/to=[4178,4204]	-23.30	PREDICTED: tensin-3-like [Salmo salar]
ssa-miR-150-3p	contig_68694	target from/to=[269,288]	-23.30	PREDICTED: adenylosuccinate lyase-like [Salmo salar]
ssa-miR-150-3p	contig_77087	target from/to=[883,902]	-23.30	PREDICTED: glutenin, high molecular weight subunit DY10-like isoform X1 [Salmo salar]
ssa-miR-150-3p	contig_83943	target from/to=[724,746]	-23.30	PREDICTED: uncharacterized protein C15orf41 homolog [Salmo salar]
ssa-miR-150-3p	contig_91141	target from/to=[356,377]	-23.30	PREDICTED: acyl-CoA-binding domain-containing protein 6-like isoform X1 [Salmo salar]
ssa-miR-150-3p	contig_10341	target from/to=[154,173]	-23.30	PREDICTED: GTP:AMP phosphotransferase AK3, mitochondrial-like isoform X2 [Salmo salar]
ssa-miR-19d-5p	contig_11568	target from/to=[83,104]	-23.30	PREDICTED: uncharacterized protein LOC106609103 isoform X4 [Salmo salar]
ssa-miR-92b-3p	contig_21751	target from/to=[108,129]	-23.30	fast myotomal muscle actin 2 [Salmo salar]
ssa-miR-30a-3p	contig_22715	target from/to=[374,396]	-23.30	PREDICTED: TBC1 domain family member 12-like isoform X2 [Salmo salar]
ssa-miR-23b-5p	contig_30140	target from/to=[3889,3909]	-23.30	PREDICTED: cdc42 effector protein 1-like [Salmo salar]
ssa-miR-150-3p	contig_30160	target from/to=[442,464]	-23.30	Retrotransposable element Tf2 155 kDa protein type 3, partial [Salmo salar]
ssa-miR-30a-3p	contig_69488	target from/to=[209,231]	-23.30	PREDICTED: probable G-protein coupled receptor 158 [Salmo salar]
ssa-miR-150-3p	contig_82584	target from/to=[322,341]	-23.30	60S ribosomal protein L27 [Salmo salar]
ssa-miR-150-3p	contig_109200	target from/to=[1487,1509]	-23.30	PREDICTED: sodium bicarbonate transporter-like protein 11 isoform X2 [Salmo salar]
ssa-miR-365-5p	contig_4342	target from/to=[2137,2158]	-23.20	Interleukin-12 receptor beta-2 chain precursor [Salmo salar]
ssa-miR-138-5p	contig_11127	target from/to=[3096,3117]	-23.20	PREDICTED: collagen alpha-5(IV) chain-like isoform X1 [Salmo salar]
ssa-miR-365-5p	contig_14279	target from/to=[80,97]	-23.20	PREDICTED: uncharacterized protein LOC106570113 isoform X1 [Salmo salar]
ssa-miR-203a-2-5p	contig_32274	target from/to=[1661,1682]	-23.20	PREDICTED: carbohydrate sulfotransferase 11-like [Salmo salar]
ssa-miR-132-3p	contig_38337	target from/to=[3508,3529]	-23.20	PREDICTED: zinc finger and SCAN domain-containing protein 2-like [Salmo salar]
ssa-miR-456-5p	contig_46192	target from/to=[507,526]	-23.20	Transposable element Tcb1 transposase [Salmo salar]
ssa-miR-138-5p	contig_46399	target from/to=[1102,1126]	-23.20	PREDICTED: 4,5-dihydroxyphthalate dehydrogenase isoform X1 [Salmo salar]
ssa-miR-17-5p	contig_80987	target from/to=[1202,1225]	-23.20	PREDICTED: uncharacterized protein LOC106597293 [Salmo salar]
ssa-miR-199a-5p	contig_19894	target from/to=[1096,1116]	-23.20	PREDICTED: alkaline phosphatase [Salmo salar]
ssa-miR-21b-3p	contig_53836	target from/to=[486,510]	-23.20	not available
ssa-miR-204-5p	contig_71421	target from/to=[6,27]	-23.20	PREDICTED: nucleoporin NUP188 homolog [Salmo salar]
ssa-miR-125b-1-3p	contig_481	target from/to=[796,815]	-23.20	PREDICTED: cytochrome c1, heme protein, mitochondrial-like [Salmo salar]
ssa-miR-30a-3p	contig_1693	target from/to=[1906,1929]	-23.20	PREDICTED: uncharacterized protein LOC106600457 [Salmo salar]
ssa-miR-92b-3p	contig_2468	target from/to=[1143,1164]	-23.20	PREDICTED: lon protease homolog, mitochondrial [Salmo salar]
ssa-miR-19d-5p	contig_2999	target from/to=[2880,2901]	-23.20	Major vault protein [Salmo salar]
ssa-miR-19d-5p	contig_6182	target from/to=[1011,1033]	-23.20	ATP synthase subunit alpha, mitochondrial precursor [Salmo salar]
ssa-miR-150-3p	contig_9194	target from/to=[590,609]	-23.20	transposase [Salmo salar]
ssa-miR-19d-5p	contig_11382	target from/to=[185,209]	-23.20	PREDICTED: zinc finger protein 239-like [Salmo salar]
ssa-miR-150-3p	contig_16011	target from/to=[820,842]	-23.20	PREDICTED: CUE domain-containing protein 1-like [Salmo salar]
ssa-miR-150-3p	contig_18615	target from/to=[209,230]	-23.20	aryl hydrocarbon receptor 1 beta-like protein [Salmo salar]
ssa-miR-19d-5p	contig_20352	target from/to=[1625,1650]	-23.20	PREDICTED: serine/threonine-protein phosphatase 6 regulatory ankyrin repeat subunit C-like isoform X2 [Salmo salar]
ssa-miR-19d-5p	contig_25001	target from/to=[458,481]	-23.20	PREDICTED: zinc finger BED domain-containing protein 1-like [Salmo salar]
ssa-miR-19d-5p	contig_28380	target from/to=[1723,1748]	-23.20	PREDICTED: zinc finger MYND domain-containing protein 11 isoform X4 [Salmo salar]
ssa-miR-150-3p	contig_29439	target from/to=[3804,3823]	-23.20	PREDICTED: stAR-related lipid transfer protein 13-like isoform X1 [Salmo salar]
ssa-miR-150-3p	contig_33006	target from/to=[1655,1676]	-23.20	PREDICTED: SH3 domain and tetratricopeptide repeat-containing protein 1-like [Salmo salar]
ssa-miR-150-3p	contig_33092	target from/to=[3488,3511]	-23.20	PREDICTED: lysosome-associated membrane glycoprotein 1-like [Salmo salar]
ssa-miR-23b-5p	contig_33287	target from/to=[1412,1430]	-23.20	PREDICTED: zinc finger protein 296 [Salmo salar]
ssa-miR-150-3p	contig_36270	target from/to=[261,284]	-23.20	PREDICTED: uncharacterized protein LOC106591608 isoform X3 [Salmo salar]
ssa-miR-23b-5p	contig_36980	target from/to=[1018,1038]	-23.20	PREDICTED: protein S100-A5-like isoform X1 [Salmo salar]
ssa-miR-150-3p	contig_37978	target from/to=[549,568]	-23.20	PREDICTED: histone acetyltransferase KAT7-like isoform X2 [Salmo salar]
ssa-miR-150-3p	contig_43271	target from/to=[1800,1821]	-23.20	PREDICTED: leucine-rich repeat flightless-interacting protein 1-like isoform X3 [Salmo salar]
ssa-miR-150-3p	contig_44211	target from/to=[1435,1454]	-23.20	PREDICTED: uncharacterized protein LOC106567027 [Salmo salar]
ssa-miR-150-3p	contig_46387	target from/to=[386,408]	-23.20	PREDICTED: folliculin-interacting protein 1-like [Salmo salar]
ssa-miR-150-3p	contig_49884	target from/to=[1961,1982]	-23.20	PREDICTED: uncharacterized protein LOC106594773 [Salmo salar]
ssa-miR-19d-5p	contig_51728	target from/to=[716,740]	-23.20	PREDICTED: DNA-binding protein RFX5-like isoform X2 [Salmo salar]
ssa-miR-19d-5p	contig_53591	target from/to=[299,323]	-23.20	ORF2 protein [Salmo salar]
ssa-miR-19d-5p	contig_70877	target from/to=[1205,1226]	-23.20	PREDICTED: membrane progestin receptor alpha-B-like isoform X2 [Salmo salar]
ssa-miR-2188-3p	contig_100685	target from/to=[1774,1796]	-23.20	PREDICTED: KN motif and ankyrin repeat domain-containing protein 4-like [Salmo salar]
ssa-miR-92b-3p	contig_126763	target from/to=[464,486]	-23.20	PREDICTED: zinc finger protein 226-like [Salmo salar]
ssa-miR-150-3p	contig_5064	target from/to=[451,475]	-23.20	PREDICTED: matrix metalloproteinase-15-like [Salmo salar]
ssa-miR-19d-5p	contig_12464	target from/to=[1269,1294]	-23.20	PREDICTED: interleukin-20 receptor subunit beta-like [Salmo salar]
ssa-miR-19d-5p	contig_15039	target from/to=[2612,2636]	-23.20	PREDICTED: glycogen phosphorylase, muscle form-like [Salmo salar]
ssa-miR-150-3p	contig_18413	target from/to=[1103,1127]	-23.20	PREDICTED: laminin subunit alpha-4-like isoform X2 [Salmo salar]
ssa-miR-19d-5p	contig_20337	target from/to=[5139,5162]	-23.20	PREDICTED: zinc finger CCHC domain-containing protein 24 [Salmo salar]
ssa-miR-150-3p	contig_26236	target from/to=[672,692]	-23.20	PREDICTED: smoothelin-like isoform X7 [Salmo salar]
ssa-miR-150-3p	contig_49703	target from/to=[1108,1130]	-23.20	PREDICTED: uncharacterized protein LOC106609042 [Salmo salar]
ssa-miR-23b-5p	contig_107931	target from/to=[1886,1905]	-23.20	PREDICTED: collagen alpha-1(VIII) chain-like [Salmo salar]
ssa-miR-23b-5p	contig_185109	target from/to=[377,394]	-23.20	PREDICTED: coiled-coil domain-containing protein 122-like [Salmo salar]
ssa-miR-8163-5p	contig_320	target from/to=[4634,4656]	-23.10	PREDICTED: tripartite motif-containing protein 16-like [Salmo salar]
ssa-miR-133a-3p	contig_16764	target from/to=[43,65]	-23.10	PREDICTED: uncharacterized protein LOC106611372 [Salmo salar]
ssa-miR-21b-3p	contig_33083	target from/to=[2937,2959]	-23.10	Transposable element Tcb1 transposase [Salmo salar]
ssa-miR-365-5p	contig_49605	target from/to=[451,470]	-23.10	PREDICTED: zinc phosphodiesterase ELAC protein 1 [Salmo salar]
ssa-miR-456-5p	contig_54147	target from/to=[476,496]	-23.10	SPATA5 [Salmo salar]
ssa-miR-365-5p	contig_56392	target from/to=[762,780]	-23.10	PREDICTED: UDP-N-acetylglucosamine transporter-like isoform X3 [Salmo salar]
ssa-miR-456-5p	contig_62529	target from/to=[1439,1457]	-23.10	PREDICTED: microtubule-associated protein 2-like isoform X10 [Salmo salar]
ssa-miR-138-5p	contig_65697	target from/to=[373,396]	-23.10	PREDICTED: dynamin-2-like isoform X3 [Salmo salar]
ssa-miR-365-5p	contig_93160	target from/to=[880,900]	-23.10	not available
ssa-miR-138-5p	contig_107385	target from/to=[192,216]	-23.10	PREDICTED: centrosomal protein POC5-like isoform X2 [Salmo salar]
ssa-miR-135b-5p	contig_32801	target from/to=[294,316]	-23.10	PREDICTED: synemin [Salmo salar]
ssa-miR-122-5p	contig_69895	target from/to=[209,228]	-23.10	PREDICTED: putative methyltransferase DDB_G0268948 isoform X4 [Salmo salar]
ssa-miR-19d-5p	contig_659	target from/to=[2590,2612]	-23.10	PREDICTED: golgin subfamily B member 1-like isoform X3 [Salmo salar]
ssa-miR-30a-3p	contig_2047	target from/to=[1015,1034]	-23.10	PREDICTED: protein FAM221A isoform X1 [Salmo salar]
ssa-miR-150-3p	contig_4920	target from/to=[69,89]	-23.10	Transposable element Tcb1 transposase [Salmo salar]
ssa-miR-19d-5p	contig_7655	target from/to=[797,820]	-23.10	PREDICTED: sterile alpha motif domain-containing protein 9-like [Salmo salar]
ssa-miR-19d-5p	contig_8750	target from/to=[3746,3770]	-23.10	PREDICTED: pikachurin-like [Salmo salar]
ssa-miR-30a-3p	contig_9321	target from/to=[1823,1844]	-23.10	PREDICTED: guanine nucleotide-binding protein subunit alpha-11-like isoform X1 [Salmo salar]
ssa-miR-19d-5p	contig_16762	target from/to=[539,564]	-23.10	SPATA5 [Salmo salar]
ssa-miR-92b-3p	contig_24468	target from/to=[2595,2618]	-23.10	PREDICTED: extracellular serine/threonine protein kinase FAM20C-like [Salmo salar]
ssa-miR-23b-5p	contig_28489	target from/to=[1974,1992]	-23.10	PREDICTED: ras and Rab interactor 2-like [Salmo salar]
ssa-miR-150-3p	contig_30620	target from/to=[324,347]	-23.10	PREDICTED: solute carrier family 12 member 7-like isoform X4 [Salmo salar]
ssa-miR-150-3p	contig_31250	target from/to=[1831,1851]	-23.10	PREDICTED: glutamyl-tRNA(Gln) amidotransferase subunit A, mitochondrial [Salmo salar]
ssa-miR-301b-5p	contig_36955	target from/to=[644,667]	-23.10	PREDICTED: xaa-Pro aminopeptidase 3 isoform X3 [Salmo salar]
ssa-miR-30a-3p	contig_43451	target from/to=[1411,1432]	-23.10	not available
ssa-miR-150-3p	contig_44207	target from/to=[930,952]	-23.10	PREDICTED: probable helicase senataxin isoform X2 [Salmo salar]
ssa-miR-30a-3p	contig_44992	target from/to=[559,579]	-23.10	Retrotransposable element Tf2 155 kDa protein type 3, partial [Salmo salar]
ssa-miR-30a-3p	contig_62579	target from/to=[493,513]	-23.10	not available
ssa-miR-30a-3p	contig_74523	target from/to=[1243,1266]	-23.10	PREDICTED: transcription factor RFX3-like isoform X1 [Salmo salar]
ssa-miR-150-3p	contig_88676	target from/to=[435,459]	-23.10	PREDICTED: tripartite motif-containing protein 16-like [Salmo salar]
ssa-miR-150-3p	contig_89341	target from/to=[883,905]	-23.10	PREDICTED: cingulin-like isoform X2 [Salmo salar]
ssa-miR-150-3p	contig_15	target from/to=[1282,1303]	-23.10	PREDICTED: uncharacterized protein KIAA1755-like isoform X2 [Salmo salar]
ssa-miR-23b-5p	contig_19774	target from/to=[4131,4150]	-23.10	PREDICTED: laminin subunit alpha-4-like [Salmo salar]
ssa-miR-19d-5p	contig_29630	target from/to=[1018,1042]	-23.10	PREDICTED: dual specificity protein phosphatase 2-like [Salmo salar]
ssa-miR-30a-3p	contig_90755	target from/to=[643,664]	-23.10	PREDICTED: uncharacterized protein LOC106613459 [Salmo salar]
ssa-miR-19d-5p	contig_90755	target from/to=[1720,1744]	-23.10	PREDICTED: uncharacterized protein LOC106613459 [Salmo salar]
ssa-miR-23b-5p	contig_93482	target from/to=[58,77]	-23.10	PREDICTED: bromodomain-containing protein 1-like, partial [Salmo salar]
ssa-miR-23b-5p	contig_103484	target from/to=[1513,1531]	-23.10	PREDICTED: neurabin-1 isoform X5 [Salmo salar]
ssa-miR-499b-5p	contig_16926	target from/to=[1290,1310]	-23.00	COL11A2, partial [Salmo salar]
ssa-miR-204-5p	contig_19143	target from/to=[248,272]	-23.00	PREDICTED: homeobox protein cut-like 1 isoform X6 [Salmo salar]
ssa-miR-204-5p	contig_21113	target from/to=[170,191]	-23.00	PREDICTED: E3 ubiquitin-protein ligase CBL isoform X1 [Salmo salar]
ssa-miR-204-5p	contig_24468	target from/to=[2539,2559]	-23.00	PREDICTED: extracellular serine/threonine protein kinase FAM20C-like [Salmo salar]
ssa-miR-456-5p	contig_26207	target from/to=[5407,5430]	-23.00	PREDICTED: collagen alpha-6(IV) chain-like isoform X4 [Salmo salar]
ssa-miR-193-3p	contig_26710	target from/to=[176,196]	-23.00	PREDICTED: vegetative cell wall protein gp1-like [Salmo salar]
ssa-miR-204-5p	contig_46847	target from/to=[25,48]	-23.00	PREDICTED: BAH and coiled-coil domain-containing protein 1 isoform X1 [Salmo salar]
ssa-miR-199a-5p	contig_62592	target from/to=[622,645]	-23.00	PREDICTED: protein LDOC1L-like [Salmo salar]
ssa-miR-138-5p	contig_74429	target from/to=[2302,2325]	-23.00	PREDICTED: zinc finger protein 11-like [Salmo salar]
ssa-miR-8163-5p	contig_91110	target from/to=[1460,1484]	-23.00	Eukaryotic translation initiation factor 1b [Salmo salar]
ssa-miR-21b-5p	contig_111528	target from/to=[834,855]	-23.00	PREDICTED: calcium/calmodulin-dependent protein kinase type II subunit beta-like [Salmo salar]
ssa-miR-138-5p	contig_144897	target from/to=[978,1001]	-23.00	ORF2 protein [Salmo salar]
ssa-miR-204-5p	contig_147988	target from/to=[466,487]	-23.00	PREDICTED: clathrin heavy chain 1-like isoform X1 [Salmo salar]
ssa-miR-19c-3-5p	contig_7629	target from/to=[1711,1734]	-23.00	Transposable element Tcb1 transposase [Salmo salar]
ssa-miR-204-5p	contig_9652	target from/to=[1962,1981]	-23.00	PREDICTED: CB055 protein isoform X3 [Salmo salar]
ssa-miR-365-5p	contig_18607	target from/to=[3818,3837]	-23.00	PREDICTED: homeobox protein MSX-2-like [Salmo salar]
ssa-miR-133b-3p	contig_32638	target from/to=[909,929]	-23.00	PREDICTED: lysyl oxidase homolog 2A-like [Salmo salar]
ssa-miR-204-5p	contig_45412	target from/to=[101,124]	-23.00	PREDICTED: fibroblast growth factor 2 [Salmo salar]
ssa-miR-133a-3p	contig_108563	target from/to=[337,357]	-23.00	not available
ssa-miR-199a-5p	contig_156217	target from/to=[10,32]	-23.00	PREDICTED: allograft inflammatory factor 1-like isoform X1 [Salmo salar]
ssa-miR-30a-3p	contig_481	target from/to=[1027,1046]	-23.00	PREDICTED: cytochrome c1, heme protein, mitochondrial-like [Salmo salar]
ssa-miR-19d-5p	contig_966	target from/to=[2057,2084]	-23.00	Cathepsin B precursor [Salmo salar]
ssa-miR-125b-1-3p	contig_6219	target from/to=[1588,1607]	-23.00	PREDICTED: cytochrome b-c1 complex subunit 1, mitochondrial-like [Salmo salar]
ssa-miR-150-3p	contig_6309	target from/to=[1452,1471]	-23.00	PREDICTED: cyclin-dependent kinase inhibitor 1B-like [Salmo salar]
ssa-miR-19d-5p	contig_13155	target from/to=[90,112]	-23.00	not available
ssa-miR-19d-5p	contig_14076	target from/to=[400,422]	-23.00	Arginyl-tRNA synthetase, cytoplasmic [Salmo salar]
ssa-miR-19d-5p	contig_19207	target from/to=[4124,4143]	-23.00	PREDICTED: uncharacterized protein LOC106613429 [Salmo salar]
ssa-miR-150-3p	contig_19255	target from/to=[3552,3576]	-23.00	PREDICTED: fibronectin type-III domain-containing protein 3A-like, partial [Salmo salar]
ssa-miR-30a-3p	contig_23669	target from/to=[997,1017]	-23.00	PREDICTED: fibroblast growth factor receptor-like 1 [Salmo salar]
ssa-miR-150-3p	contig_26207	target from/to=[3623,3644]	-23.00	PREDICTED: collagen alpha-6(IV) chain-like isoform X4 [Salmo salar]
ssa-miR-30a-3p	contig_28380	target from/to=[315,337]	-23.00	PREDICTED: zinc finger MYND domain-containing protein 11 isoform X4 [Salmo salar]
ssa-miR-19d-5p	contig_29671	target from/to=[1216,1236]	-23.00	PREDICTED: SH3 domain-containing protein 19-like [Salmo salar]
ssa-miR-19d-5p	contig_29985	target from/to=[638,661]	-23.00	Myelin protein zero-like protein 2 precursor [Salmo salar]
ssa-miR-150-3p	contig_30721	target from/to=[767,789]	-23.00	Transmembrane and TPR repeat-containing protein 4 [Salmo salar]
ssa-miR-19d-5p	contig_33092	target from/to=[951,970]	-23.00	PREDICTED: lysosome-associated membrane glycoprotein 1-like [Salmo salar]
ssa-miR-125b-1-3p	contig_41333	target from/to=[103,122]	-23.00	not available
ssa-miR-150-3p	contig_46399	target from/to=[1335,1354]	-23.00	PREDICTED: 4,5-dihydroxyphthalate dehydrogenase isoform X1 [Salmo salar]
ssa-miR-150-3p	contig_52073	target from/to=[315,338]	-23.00	PREDICTED: multiple C2 and transmembrane domain-containing protein 2-like isoform X4 [Salmo salar]
ssa-miR-125b-1-3p	contig_56546	target from/to=[962,982]	-23.00	PREDICTED: zinc finger and SCAN domain-containing protein 4-like isoform X1 [Salmo salar]
ssa-miR-150-3p	contig_58441	target from/to=[380,402]	-23.00	PREDICTED: spindle and kinetochore-associated protein 3 isoform X1 [Salmo salar]
ssa-miR-150-3p	contig_70922	target from/to=[384,403]	-23.00	PREDICTED: forkhead box protein J3-like isoform X2 [Salmo salar]
ssa-miR-150-3p	contig_73887	target from/to=[793,814]	-23.00	PREDICTED: NAD-dependent protein lipoamidase sirtuin-4, mitochondrial isoform X1 [Salmo salar]
ssa-miR-30a-3p	contig_75082	target from/to=[1207,1226]	-23.00	PREDICTED: ras-related protein Rab-9B-like [Salmo salar]
ssa-miR-19d-5p	contig_81328	target from/to=[621,645]	-23.00	transposase [Salmo salar]
ssa-miR-92b-3p	contig_95447	target from/to=[506,527]	-23.00	collagen Type XI Alpha2 [Salmo salar]
ssa-miR-150-3p	contig_97305	target from/to=[514,537]	-23.00	chaperonin [Salmo salar]
ssa-miR-30a-3p	contig_14323	target from/to=[998,1020]	-23.00	not available
ssa-miR-150-3p	contig_16087	target from/to=[814,837]	-23.00	PREDICTED: collagen alpha-2(VI) chain-like, partial [Salmo salar]
ssa-miR-19d-5p	contig_39963	target from/to=[950,975]	-23.00	PREDICTED: endothelin B receptor-like [Salmo salar]
ssa-miR-19d-5p	contig_55074	target from/to=[936,961]	-23.00	PREDICTED: endothelin B receptor-like [Salmo salar]
ssa-miR-19d-5p	contig_55266	target from/to=[711,738]	-23.00	not available
ssa-miR-19d-5p	contig_88051	target from/to=[46,67]	-23.00	COL11A2, partial [Salmo salar]
ssa-miR-30a-3p	contig_94190	target from/to=[5601,5623]	-23.00	PREDICTED: obscurin-like isoform X1 [Salmo salar]
ssa-miR-30a-3p	contig_98614	target from/to=[2389,2407]	-23.00	PREDICTED: laminin subunit alpha-2 [Salmo salar]
ssa-miR-19d-5p	contig_135618	target from/to=[361,386]	-23.00	PREDICTED: angiopoietin-1-like isoform X1 [Salmo salar]
ssa-miR-19c-3-5p	contig_286	target from/to=[130,155]	-22.90	PREDICTED: apolipoprotein Eb-like [Salmo salar]
ssa-miR-193-3p	contig_1711	target from/to=[3394,3413]	-22.90	PREDICTED: transmembrane protease serine 9-like isoform X2 [Salmo salar]
ssa-miR-2184-3p	contig_4372	target from/to=[876,896]	-22.90	PREDICTED: apoptotic chromatin condensation inducer in the nucleus-like isoform X2 [Salmo salar]
ssa-miR-365-5p	contig_16857	target from/to=[5724,5742]	-22.90	PREDICTED: collagen alpha-6(IV) chain-like isoform X3 [Salmo salar]
ssa-miR-138-5p	contig_31657	target from/to=[2258,2279]	-22.90	PREDICTED: zinc finger protein 518A-like [Salmo salar]
ssa-miR-204-5p	contig_34454	target from/to=[39,63]	-22.90	PREDICTED: RNA-binding protein 42-like [Salmo salar]
ssa-miR-122-5p	contig_56652	target from/to=[1621,1643]	-22.90	PREDICTED: uncharacterized protein LOC106591608 isoform X3 [Salmo salar]
ssa-miR-10b-5p	contig_62981	target from/to=[587,608]	-22.90	not available
ssa-miR-133a-3p	contig_89451	target from/to=[138,159]	-22.90	PREDICTED: protein Shroom3-like isoform X9 [Salmo salar]
ssa-miR-21b-5p	contig_91907	target from/to=[1390,1412]	-22.90	PREDICTED: protein FAM110B-like [Salmo salar]
ssa-miR-135b-5p	contig_92002	target from/to=[1223,1246]	-22.90	PREDICTED: glutenin, high molecular weight subunit DY10-like isoform X1 [Salmo salar]
ssa-miR-133a-3p	contig_122361	target from/to=[1273,1293]	-22.90	PREDICTED: ataxin-1-like, partial [Salmo salar]
ssa-miR-449a-5p	contig_30135	target from/to=[2933,2957]	-22.90	PREDICTED: platelet-derived growth factor receptor-like protein isoform X1 [Salmo salar]
ssa-miR-122-5p	contig_113699	target from/to=[34,55]	-22.90	GDP-L-fucose synthetase [Salmo salar]
ssa-miR-150-3p	contig_1747	target from/to=[90,114]	-22.90	Transposable element Tcb2 transposase [Salmo salar]
ssa-miR-150-3p	contig_2701	target from/to=[3136,3155]	-22.90	PREDICTED: 60 kDa heat shock protein, mitochondrial isoform X1 [Salmo salar]
ssa-miR-19d-5p	contig_2972	target from/to=[2028,2051]	-22.90	PREDICTED: type I inositol 1,4,5-trisphosphate 5-phosphatase-like [Salmo salar]
ssa-miR-19d-5p	contig_10968	target from/to=[1233,1255]	-22.90	PREDICTED: interferon-induced GTP-binding protein Mx-like isoform X2 [Salmo salar]
ssa-miR-19d-5p	contig_12913	target from/to=[2175,2198]	-22.90	ATP-binding cassette sub-family B member 8, mitochondrial precursor [Salmo salar]
ssa-miR-150-3p	contig_14541	target from/to=[2267,2286]	-22.90	transposase [Salmo salar]
ssa-miR-19d-5p	contig_17335	target from/to=[426,449]	-22.90	Transposable element Tcb1 transposase [Salmo salar]
ssa-miR-150-3p	contig_17636	target from/to=[1595,1617]	-22.90	PREDICTED: fibroblast growth factor receptor-like 1 isoform X1 [Salmo salar]
ssa-miR-150-3p	contig_19581	target from/to=[1238,1258]	-22.90	PREDICTED: ribonuclease ZC3H12A-like [Salmo salar]
ssa-miR-2188-3p	contig_20569	target from/to=[2156,2177]	-22.90	PREDICTED: G-protein-signaling modulator 2-like isoform X1 [Salmo salar]
ssa-miR-150-3p	contig_22619	target from/to=[10719,10741]	-22.90	PREDICTED: phosphatidylinositol 3-kinase regulatory subunit gamma-like isoform X1 [Salmo salar]
ssa-miR-125b-1-3p	contig_26496	target from/to=[8551,8570]	-22.90	PREDICTED: sterile alpha motif domain-containing protein 9-like [Salmo salar]
ssa-miR-23b-5p	contig_30620	target from/to=[430,450]	-22.90	PREDICTED: solute carrier family 12 member 7-like isoform X4 [Salmo salar]
ssa-miR-23b-5p	contig_30721	target from/to=[340,360]	-22.90	Transmembrane and TPR repeat-containing protein 4 [Salmo salar]
ssa-miR-150-3p	contig_36955	target from/to=[622,644]	-22.90	PREDICTED: xaa-Pro aminopeptidase 3 isoform X3 [Salmo salar]
ssa-miR-19d-5p	contig_42399	target from/to=[2313,2335]	-22.90	PREDICTED: uncharacterized protein LOC106600457 [Salmo salar]
ssa-miR-2188-3p	contig_42683	target from/to=[2085,2106]	-22.90	not available
ssa-miR-19d-5p	contig_48880	target from/to=[1769,1794]	-22.90	Mannose-6-phosphate receptor-binding protein 1 [Salmo salar]
ssa-miR-19d-5p	contig_49007	target from/to=[888,914]	-22.90	Deoxyribonuclease gamma precursor [Salmo salar]
ssa-miR-150-3p	contig_52239	target from/to=[1864,1887]	-22.90	not available
ssa-miR-150-3p	contig_54757	target from/to=[698,715]	-22.90	PREDICTED: uncharacterized protein LOC106611174 [Salmo salar]
ssa-miR-30a-3p	contig_64681	target from/to=[305,322]	-22.90	PREDICTED: myb-related transcription factor, partner of profilin-like [Salmo salar]
ssa-miR-125b-1-3p	contig_76429	target from/to=[1297,1315]	-22.90	PREDICTED: protein O-GlcNAcase-like isoform X3 [Salmo salar]
ssa-miR-30a-3p	contig_86703	target from/to=[957,979]	-22.90	PREDICTED: THAP domain-containing protein 10 isoform X2 [Salmo salar]
ssa-miR-150-3p	contig_94270	target from/to=[1242,1262]	-22.90	PREDICTED: sphingosine-1-phosphate phosphatase 2-like isoform X1 [Salmo salar]
ssa-miR-150-3p	contig_5064	target from/to=[347,369]	-22.90	PREDICTED: matrix metalloproteinase-15-like [Salmo salar]
ssa-miR-19d-5p	contig_8819	target from/to=[4766,4789]	-22.90	PREDICTED: anosmin-1-like [Salmo salar]
ssa-miR-150-3p	contig_12490	target from/to=[2538,2563]	-22.90	PREDICTED: cytosolic phospholipase A2-like [Salmo salar]
ssa-miR-30a-3p	contig_33389	target from/to=[588,609]	-22.90	PREDICTED: serine/threonine-protein kinase WNK2-like isoform X2 [Salmo salar]
ssa-miR-19d-5p	contig_53475	target from/to=[392,418]	-22.90	PREDICTED: calcitonin gene-related peptide type 1 receptor-like [Salmo salar]
ssa-miR-19d-5p	contig_57393	target from/to=[2062,2088]	-22.90	PREDICTED: probable inactive glycosyltransferase 25 family member 3 [Salmo salar]
ssa-miR-19d-5p	contig_65783	target from/to=[1849,1873]	-22.90	PREDICTED: ladderlectin-like, partial [Salmo salar]
ssa-miR-150-3p	contig_87385	target from/to=[225,246]	-22.90	not available
ssa-miR-2188-3p	contig_103484	target from/to=[3081,3103]	-22.90	PREDICTED: neurabin-1 isoform X5 [Salmo salar]
ssa-miR-150-3p	contig_110314	target from/to=[1448,1466]	-22.90	Very long-chain acyl-CoA synthetase [Salmo salar]
ssa-miR-138-5p	contig_1228	target from/to=[672,694]	-22.80	Heat shock cognate 70 kDa protein [Salmo salar]
ssa-miR-138-5p	contig_1571	target from/to=[733,752]	-22.80	ADP/ATP translocase 2 [Salmo salar]
ssa-miR-206-3p	contig_1722	target from/to=[19,42]	-22.80	60S ribosomal protein L35a [Salmo salar]
ssa-miR-214-5p	contig_4282	target from/to=[1352,1371]	-22.80	PREDICTED: tetratricopeptide repeat protein 7A-like isoform X2 [Salmo salar]
ssa-miR-206-3p	contig_13966	target from/to=[1009,1029]	-22.80	collagen Type XI Alpha2 [Salmo salar]
ssa-miR-133a-3p	contig_14076	target from/to=[295,319]	-22.80	Arginyl-tRNA synthetase, cytoplasmic [Salmo salar]
ssa-miR-204-5p	contig_14741	target from/to=[2098,2121]	-22.80	PREDICTED: oocyte zinc finger protein XlCOF6-like [Salmo salar]
ssa-miR-21b-3p	contig_19207	target from/to=[3358,3377]	-22.80	PREDICTED: uncharacterized protein LOC106613429 [Salmo salar]
ssa-miR-122-5p	contig_30469	target from/to=[2109,2127]	-22.80	PREDICTED: uncharacterized protein LOC106577159 [Salmo salar]
ssa-miR-199a-3p	contig_51305	target from/to=[160,180]	-22.80	PREDICTED: 40S ribosomal protein S5-like [Salmo salar]
ssa-miR-204-5p	contig_58441	target from/to=[141,164]	-22.80	PREDICTED: spindle and kinetochore-associated protein 3 isoform X1 [Salmo salar]
ssa-miR-199a-3p	contig_72758	target from/to=[2698,2717]	-22.80	PREDICTED: trinucleotide repeat-containing gene 6C protein-like isoform X3 [Salmo salar]
ssa-miR-365-5p	contig_91095	target from/to=[774,793]	-22.80	PREDICTED: uncharacterized protein C12orf43-like isoform X1 [Salmo salar]
ssa-miR-193-3p	contig_20536	target from/to=[2247,2270]	-22.80	collagen Type XI Alpha2 [Salmo salar]
ssa-miR-206-3p	contig_21084	target from/to=[6626,6646]	-22.80	PREDICTED: collagen alpha-1(IV) chain-like [Salmo salar]
ssa-miR-133a-3p	contig_21874	target from/to=[113,133]	-22.80	PREDICTED: moesin-like [Salmo salar]
ssa-miR-204-5p	contig_42475	target from/to=[2200,2220]	-22.80	PREDICTED: fibroblast growth factor receptor-like 1 isoform X1 [Salmo salar]
ssa-miR-204-5p	contig_57089	target from/to=[4923,4943]	-22.80	PREDICTED: brefeldin A-inhibited guanine nucleotide-exchange protein 3 isoform X5 [Salmo salar]
ssa-miR-133a-3p	contig_110225	target from/to=[1288,1308]	-22.80	PREDICTED: zinc finger protein 385A-like isoform X5 [Salmo salar]
ssa-miR-150-3p	contig_902	target from/to=[1012,1035]	-22.80	PREDICTED: heat shock protein HSP 90-beta isoform X1 [Salmo salar]
ssa-miR-19d-5p	contig_2999	target from/to=[2499,2524]	-22.80	Major vault protein [Salmo salar]
ssa-miR-150-3p	contig_4344	target from/to=[1478,1500]	-22.80	PREDICTED: sialic acid synthase-like [Salmo salar]
ssa-miR-150-3p	contig_6113	target from/to=[1846,1867]	-22.80	tubulin tyrosine ligase-like family member 6a [Salmo salar]
ssa-miR-222b-5p	contig_6573	target from/to=[1458,1478]	-22.80	PREDICTED: NF-kappa-B inhibitor alpha-like [Salmo salar]
ssa-miR-30a-3p	contig_8834	target from/to=[310,334]	-22.80	PREDICTED: G1/S-specific cyclin-D2-like [Salmo salar]
ssa-miR-19d-5p	contig_9817	target from/to=[239,259]	-22.80	PREDICTED: moesin-like [Salmo salar]
ssa-miR-30a-3p	contig_11634	target from/to=[423,446]	-22.80	Threonyl-tRNA synthetase, cytoplasmic, partial [Salmo salar]
ssa-miR-222b-5p	contig_17636	target from/to=[1899,1919]	-22.80	PREDICTED: fibroblast growth factor receptor-like 1 isoform X1 [Salmo salar]
ssa-miR-150-3p	contig_19406	target from/to=[259,283]	-22.80	PREDICTED: homeodomain-interacting protein kinase 2-like isoform X5 [Salmo salar]
ssa-miR-19d-5p	contig_21113	target from/to=[3363,3387]	-22.80	PREDICTED: E3 ubiquitin-protein ligase CBL isoform X1 [Salmo salar]
ssa-miR-194a-5p	contig_28213	target from/to=[1352,1374]	-22.80	MAP kinase-activated protein kinase 3 [Salmo salar]
ssa-miR-150-3p	contig_28441	target from/to=[888,909]	-22.80	PREDICTED: 39S ribosomal protein L38, mitochondrial [Salmo salar]
ssa-miR-150-3p	contig_32274	target from/to=[74,94]	-22.80	PREDICTED: carbohydrate sulfotransferase 11-like [Salmo salar]
ssa-miR-150-3p	contig_37080	target from/to=[1113,1134]	-22.80	PREDICTED: uncharacterized protein LOC106589469 [Salmo salar]
ssa-miR-92b-3p	contig_37692	target from/to=[453,474]	-22.80	PREDICTED: protein FAM166B-like [Salmo salar]
ssa-miR-23b-5p	contig_41486	target from/to=[1534,1555]	-22.80	PREDICTED: F-box only protein 30-like [Salmo salar]
ssa-miR-30a-3p	contig_42143	target from/to=[1339,1359]	-22.80	PREDICTED: uncharacterized protein LOC106562889 [Salmo salar]
ssa-miR-150-3p	contig_42247	target from/to=[1456,1477]	-22.80	PREDICTED: protein FAM83H-like isoform X2 [Salmo salar]
ssa-miR-181a-4-3p	contig_45870	target from/to=[2683,2705]	-22.80	PREDICTED: prolyl 3-hydroxylase 1 [Salmo salar]
ssa-miR-150-3p	contig_46465	target from/to=[1238,1259]	-22.80	Cyclin-Y [Salmo salar]
ssa-miR-30a-3p	contig_48360	target from/to=[989,1011]	-22.80	PREDICTED: 28S ribosomal protein S5, mitochondrial-like [Salmo salar]
ssa-miR-23b-5p	contig_56770	target from/to=[374,392]	-22.80	PREDICTED: UDP-N-acetylglucosamine transporter-like isoform X3 [Salmo salar]
ssa-miR-19d-5p	contig_59557	target from/to=[685,708]	-22.80	PREDICTED: coiled-coil domain-containing protein 125 isoform X2 [Salmo salar]
ssa-miR-23b-5p	contig_60381	target from/to=[650,671]	-22.80	PREDICTED: protein EURL homolog [Salmo salar]
ssa-miR-23b-5p	contig_64408	target from/to=[172,190]	-22.80	olfactory receptor family C subfamily 4 member 9 [Salmo salar]
ssa-miR-19d-5p	contig_64707	target from/to=[822,843]	-22.80	FGF2 [Salmo salar]
ssa-miR-150-3p	contig_70340	target from/to=[524,546]	-22.80	Lipoma HMGIC fusion partner-like 4 protein [Salmo salar]
ssa-miR-301b-5p	contig_73370	target from/to=[158,177]	-22.80	not available
ssa-miR-19d-5p	contig_85733	target from/to=[2043,2070]	-22.80	PREDICTED: transcription factor MafG-like [Salmo salar]
ssa-miR-19d-5p	contig_87428	target from/to=[1653,1676]	-22.80	not available
ssa-miR-150-3p	contig_89528	target from/to=[2142,2160]	-22.80	Retrotransposable element Tf2 155 kDa protein type 3, partial [Salmo salar]
ssa-miR-19d-5p	contig_89528	target from/to=[3550,3574]	-22.80	Retrotransposable element Tf2 155 kDa protein type 3, partial [Salmo salar]
ssa-miR-23b-5p	contig_94270	target from/to=[134,154]	-22.80	PREDICTED: sphingosine-1-phosphate phosphatase 2-like isoform X1 [Salmo salar]
ssa-miR-150-3p	contig_150	target from/to=[1567,1587]	-22.80	PREDICTED: interferon-induced guanylate-binding protein 1-like [Salmo salar]
ssa-miR-150-3p	contig_1271	target from/to=[4001,4026]	-22.80	PREDICTED: taperin-like [Salmo salar]
ssa-miR-2188-3p	contig_5064	target from/to=[1653,1674]	-22.80	PREDICTED: matrix metalloproteinase-15-like [Salmo salar]
ssa-miR-30a-3p	contig_7680	target from/to=[556,577]	-22.80	PREDICTED: collagen alpha-1(XXIII) chain-like isoform X7 [Salmo salar]
ssa-miR-19d-5p	contig_33389	target from/to=[444,465]	-22.80	PREDICTED: serine/threonine-protein kinase WNK2-like isoform X2 [Salmo salar]
ssa-miR-150-3p	contig_38417	target from/to=[536,556]	-22.80	not available
ssa-miR-150-3p	contig_40463	target from/to=[816,837]	-22.80	PREDICTED: tryptase-like [Salmo salar]
ssa-miR-150-3p	contig_53637	target from/to=[77,100]	-22.80	Transposable element Tcb1 transposase [Salmo salar]
ssa-miR-19d-5p	contig_94190	target from/to=[2679,2705]	-22.80	PREDICTED: obscurin-like isoform X1 [Salmo salar]
ssa-miR-138-5p	contig_1676	target from/to=[598,622]	-22.70	FIP2-like [Salmo salar]
ssa-miR-133a-3p	contig_4963	target from/to=[392,413]	-22.70	PREDICTED: insulin-like growth factor 2 mRNA-binding protein 3 [Salmo salar]
ssa-miR-365-5p	contig_5267	target from/to=[3115,3134]	-22.70	PREDICTED: 26S proteasome non-ATPase regulatory subunit 1 isoform X1 [Salmo salar]
ssa-miR-204-5p	contig_5548	target from/to=[53,73]	-22.70	PREDICTED: BUD13 homolog [Salmo salar]
ssa-miR-456-5p	contig_8695	target from/to=[23,44]	-22.70	Deoxyribonuclease gamma precursor [Salmo salar]
ssa-miR-15b-5p	contig_12324	target from/to=[969,990]	-22.70	Hydroxyacyl-coenzyme A dehydrogenase, mitochondrial precursor [Salmo salar]
ssa-miR-133a-3p	contig_31121	target from/to=[1186,1210]	-22.70	not available
ssa-miR-18b-5p	contig_32037	target from/to=[1336,1357]	-22.70	PREDICTED: solute carrier family 17 member 9-like [Salmo salar]
ssa-miR-8163-5p	contig_33083	target from/to=[3013,3035]	-22.70	Transposable element Tcb1 transposase [Salmo salar]
ssa-miR-133b-3p	contig_37080	target from/to=[1058,1082]	-22.70	PREDICTED: uncharacterized protein LOC106589469 [Salmo salar]
ssa-miR-138-5p	contig_43629	target from/to=[205,229]	-22.70	not available
ssa-miR-214-5p	contig_44145	target from/to=[567,588]	-22.70	PREDICTED: rho GTPase-activating protein 20-like [Salmo salar]
ssa-miR-132-3p	contig_76686	target from/to=[436,458]	-22.70	RCC2 homolog [Salmo salar]
ssa-miR-138-5p	contig_26236	target from/to=[735,757]	-22.70	PREDICTED: smoothelin-like isoform X7 [Salmo salar]
ssa-miR-365-5p	contig_31076	target from/to=[2044,2061]	-22.70	PREDICTED: EMILIN-3 [Salmo salar]
ssa-miR-8163-5p	contig_33642	target from/to=[674,699]	-22.70	PREDICTED: dickkopf-related protein 2 [Salmo salar]
ssa-miR-214-5p	contig_45773	target from/to=[397,417]	-22.70	PREDICTED: scavenger receptor class A member 3-like [Salmo salar]
ssa-miR-449a-5p	contig_71032	target from/to=[390,412]	-22.70	PREDICTED: protein-methionine sulfoxide oxidase MICAL2-like isoform X1 [Salmo salar]
ssa-miR-204-5p	contig_124113	target from/to=[158,181]	-22.70	PREDICTED: endophilin-A3-like isoform X1 [Salmo salar]
ssa-miR-19d-5p	contig_284	target from/to=[3495,3516]	-22.70	PREDICTED: serine protease 27-like [Salmo salar]
ssa-miR-2188-3p	contig_286	target from/to=[132,154]	-22.70	PREDICTED: apolipoprotein Eb-like [Salmo salar]
ssa-miR-150-3p	contig_1572	target from/to=[1236,1259]	-22.70	PREDICTED: amyloid beta A4 precursor protein-binding family B member 1-like isoform X4 [Salmo salar]
ssa-miR-150-3p	contig_2701	target from/to=[2463,2484]	-22.70	PREDICTED: 60 kDa heat shock protein, mitochondrial isoform X1 [Salmo salar]
ssa-miR-30a-3p	contig_7358	target from/to=[1941,1961]	-22.70	PREDICTED: LIM domain and actin-binding protein 1-like isoform X1 [Salmo salar]
ssa-miR-150-3p	contig_8750	target from/to=[1766,1785]	-22.70	PREDICTED: pikachurin-like [Salmo salar]
ssa-miR-150-3p	contig_11127	target from/to=[570,592]	-22.70	PREDICTED: collagen alpha-5(IV) chain-like isoform X1 [Salmo salar]
ssa-miR-150-3p	contig_11238	target from/to=[893,913]	-22.70	PREDICTED: synaptotagmin-like protein 2 isoform X5 [Salmo salar]
ssa-miR-30a-3p	contig_16575	target from/to=[930,954]	-22.70	PREDICTED: V-type proton ATPase catalytic subunit A-like [Salmo salar]
ssa-miR-19d-5p	contig_20114	target from/to=[1071,1094]	-22.70	PREDICTED: solute carrier family 35 member F6-like isoform X1 [Salmo salar]
ssa-miR-19d-5p	contig_25782	target from/to=[8054,8078]	-22.70	PREDICTED: phosphatidylinositol 3-kinase regulatory subunit gamma isoform X1 [Salmo salar]
ssa-miR-19d-5p	contig_28489	target from/to=[858,882]	-22.70	PREDICTED: ras and Rab interactor 2-like [Salmo salar]
ssa-miR-19d-5p	contig_30625	target from/to=[1779,1802]	-22.70	PREDICTED: uncharacterized protein LOC106600457 [Salmo salar]
ssa-miR-150-3p	contig_35819	target from/to=[605,626]	-22.70	PREDICTED: uncharacterized protein LOC106597293 [Salmo salar]
ssa-miR-194a-5p	contig_36964	target from/to=[210,232]	-22.70	28S ribosomal protein S18a, mitochondrial precursor [Salmo salar]
ssa-miR-19d-5p	contig_40526	target from/to=[2606,2631]	-22.70	PREDICTED: uncharacterized protein LOC106572570 [Salmo salar]
ssa-miR-19d-5p	contig_41486	target from/to=[1121,1146]	-22.70	PREDICTED: F-box only protein 30-like [Salmo salar]
ssa-miR-30a-3p	contig_44891	target from/to=[11,32]	-22.70	PREDICTED: vegetative cell wall protein gp1-like [Salmo salar]
ssa-miR-19d-5p	contig_46192	target from/to=[500,521]	-22.70	Transposable element Tcb1 transposase [Salmo salar]
ssa-miR-125b-1-3p	contig_48926	target from/to=[585,606]	-22.70	PREDICTED: uncharacterized protein LOC106583985 [Salmo salar]
ssa-miR-19d-5p	contig_51677	target from/to=[795,820]	-22.70	PREDICTED: WD repeat-containing protein 25 isoform X1 [Salmo salar]
ssa-miR-19d-5p	contig_52442	target from/to=[423,446]	-22.70	ORF2 protein [Salmo salar]
ssa-miR-2188-3p	contig_53664	target from/to=[1195,1216]	-22.70	PREDICTED: uncharacterized protein LOC106587367 isoform X1 [Salmo salar]
ssa-miR-150-3p	contig_57200	target from/to=[2586,2607]	-22.70	PREDICTED: beta-galactoside alpha-2,6-sialyltransferase 2 [Salmo salar]
ssa-miR-23b-5p	contig_60983	target from/to=[627,647]	-22.70	Deoxyribonuclease gamma precursor [Salmo salar]
ssa-miR-92b-3p	contig_70090	target from/to=[1200,1221]	-22.70	PREDICTED: phosphofurin acidic cluster sorting protein 2-like isoform X2 [Salmo salar]
ssa-miR-19d-5p	contig_71260	target from/to=[1250,1274]	-22.70	PREDICTED: putative ferric-chelate reductase 1 isoform X2 [Salmo salar]
ssa-miR-30a-3p	contig_75571	target from/to=[1130,1153]	-22.70	PREDICTED: uncharacterized protein LOC106565305 [Salmo salar]
ssa-miR-30a-3p	contig_78303	target from/to=[356,378]	-22.70	not available
ssa-miR-150-3p	contig_90006	target from/to=[447,469]	-22.70	PREDICTED: uncharacterized protein LOC106561540 isoform X1 [Salmo salar]
ssa-miR-19d-5p	contig_92790	target from/to=[898,920]	-22.70	not available
ssa-miR-150-3p	contig_93962	target from/to=[812,836]	-22.70	not available
ssa-miR-19d-5p	contig_101884	target from/to=[53,76]	-22.70	not available
ssa-miR-150-3p	contig_115630	target from/to=[325,347]	-22.70	PREDICTED: clathrin heavy chain 1-like isoform X4 [Salmo salar]
ssa-miR-150-3p	contig_145207	target from/to=[1126,1148]	-22.70	not available
ssa-miR-19d-5p	contig_63	target from/to=[869,893]	-22.70	PREDICTED: zinc finger protein Rlf-like [Salmo salar]
ssa-miR-150-3p	contig_7629	target from/to=[2137,2159]	-22.70	Transposable element Tcb1 transposase [Salmo salar]
ssa-miR-19d-5p	contig_43846	target from/to=[48,69]	-22.70	PREDICTED: nucleotide-binding oligomerization domain-containing protein 2 isoform X2 [Salmo salar]
ssa-miR-150-3p	contig_56161	target from/to=[1811,1832]	-22.70	PREDICTED: procollagen galactosyltransferase 2-like [Salmo salar]
ssa-miR-150-3p	contig_57393	target from/to=[975,998]	-22.70	PREDICTED: probable inactive glycosyltransferase 25 family member 3 [Salmo salar]
ssa-miR-23b-5p	contig_62527	target from/to=[1012,1031]	-22.70	PREDICTED: protein yippee-like 2 isoform X2 [Salmo salar]
ssa-miR-92b-3p	contig_107898	target from/to=[51,70]	-22.70	PREDICTED: MAPK/MAK/MRK overlapping kinase-like isoform X5 [Salmo salar]
ssa-miR-19d-5p	contig_118448	target from/to=[929,953]	-22.70	PREDICTED: synaptophysin-like protein 1 [Salmo salar]
ssa-miR-449a-5p	contig_320	target from/to=[2483,2505]	-22.60	PREDICTED: tripartite motif-containing protein 16-like [Salmo salar]
ssa-miR-138-5p	contig_9443	target from/to=[201,222]	-22.60	PREDICTED: RNA-directed DNA polymerase homolog [Salmo salar]
ssa-miR-8163-5p	contig_12352	target from/to=[721,744]	-22.60	Amidophosphoribosyltransferase precursor [Salmo salar]
ssa-miR-204-5p	contig_12934	target from/to=[417,440]	-22.60	PREDICTED: transcription factor 7-like 2 isoform X30 [Salmo salar]
ssa-miR-365-5p	contig_17636	target from/to=[1103,1122]	-22.60	PREDICTED: fibroblast growth factor receptor-like 1 isoform X1 [Salmo salar]
ssa-miR-456-5p	contig_18615	target from/to=[997,1017]	-22.60	aryl hydrocarbon receptor 1 beta-like protein [Salmo salar]
ssa-miR-122-5p	contig_19465	target from/to=[1158,1181]	-22.60	not available
ssa-miR-133a-3p	contig_21113	target from/to=[5088,5111]	-22.60	PREDICTED: E3 ubiquitin-protein ligase CBL isoform X1 [Salmo salar]
ssa-miR-133a-3p	contig_25257	target from/to=[2683,2706]	-22.60	PREDICTED: evolutionarily conserved signaling intermediate in Toll pathway, mitochondrial [Salmo salar]
ssa-miR-449a-5p	contig_26921	target from/to=[275,295]	-22.60	PREDICTED: NADPH oxidase organizer 1-like [Salmo salar]
ssa-miR-19c-3-5p	contig_28265	target from/to=[177,200]	-22.60	PREDICTED: uncharacterized protein LOC106591608 isoform X3 [Salmo salar]
ssa-miR-338a-3-5p	contig_28412	target from/to=[239,262]	-22.60	PREDICTED: E3 ubiquitin-protein ligase listerin isoform X1 [Salmo salar]
ssa-miR-122-5p	contig_33258	target from/to=[14,34]	-22.60	hypothetical protein [Salmo salar]
ssa-miR-138-5p	contig_33854	target from/to=[1704,1726]	-22.60	PREDICTED: uncharacterized protein LOC106600457 [Salmo salar]
ssa-miR-214-5p	contig_49016	target from/to=[268,291]	-22.60	PREDICTED: CUGBP Elav-like family member 2 isoform X11 [Salmo salar]
ssa-miR-204-5p	contig_51052	target from/to=[266,286]	-22.60	Coproporphyrinogen III oxidase, mitochondrial precursor [Salmo salar]
ssa-miR-365-5p	contig_52725	target from/to=[450,469]	-22.60	Deoxyribonuclease gamma precursor [Salmo salar]
ssa-miR-138-5p	contig_61172	target from/to=[1206,1229]	-22.60	PREDICTED: olfactory receptor 11A1-like [Salmo salar]
ssa-miR-122-5p	contig_71127	target from/to=[840,863]	-22.60	PREDICTED: FAD-dependent oxidoreductase domain-containing protein 1 isoform X2 [Salmo salar]
ssa-miR-199a-5p	contig_85289	target from/to=[27,48]	-22.60	PREDICTED: caspase recruitment domain-containing protein 8-like [Salmo salar]
ssa-miR-199a-5p	contig_92405	target from/to=[1719,1740]	-22.60	PREDICTED: E3 ubiquitin-protein ligase RNF43 [Salmo salar]
ssa-miR-204-5p	contig_144897	target from/to=[189,211]	-22.60	ORF2 protein [Salmo salar]
ssa-miR-204-5p	contig_4433	target from/to=[29,50]	-22.60	PREDICTED: deoxynucleoside triphosphate triphosphohydrolase SAMHD1-like [Salmo salar]
ssa-miR-214-5p	contig_8615	target from/to=[1321,1343]	-22.60	PREDICTED: matrix metalloproteinase-14-like [Salmo salar]
ssa-miR-19c-3-5p	contig_8819	target from/to=[1913,1938]	-22.60	PREDICTED: anosmin-1-like [Salmo salar]
ssa-miR-21b-3p	contig_41216	target from/to=[603,623]	-22.60	PREDICTED: serine/threonine-protein kinase D3-like isoform X1 [Salmo salar]
ssa-miR-26a-3-3p	contig_57089	target from/to=[2191,2212]	-22.60	PREDICTED: brefeldin A-inhibited guanine nucleotide-exchange protein 3 isoform X5 [Salmo salar]
ssa-miR-138-5p	contig_57089	target from/to=[2559,2582]	-22.60	PREDICTED: brefeldin A-inhibited guanine nucleotide-exchange protein 3 isoform X5 [Salmo salar]
ssa-miR-138-5p	contig_96765	target from/to=[1503,1529]	-22.60	PREDICTED: uncharacterized protein LOC106565877 isoform X2 [Salmo salar]
ssa-miR-150-3p	contig_133	target from/to=[1081,1102]	-22.60	PREDICTED: vesicle transport protein GOT1B-like [Salmo salar]
ssa-miR-19d-5p	contig_415	target from/to=[217,240]	-22.60	PREDICTED: annexin A2-like isoform X2 [Salmo salar]
ssa-miR-150-3p	contig_521	target from/to=[165,188]	-22.60	Rhamnose-binding lectin precursor [Salmo salar]
ssa-miR-19d-5p	contig_696	target from/to=[2033,2061]	-22.60	Carbonic anhydrase [Salmo salar]
ssa-miR-2188-3p	contig_1571	target from/to=[496,517]	-22.60	ADP/ATP translocase 2 [Salmo salar]
ssa-miR-150-3p	contig_7048	target from/to=[371,393]	-22.60	Elongation factor 1-beta [Salmo salar]
ssa-miR-19d-5p	contig_8118	target from/to=[1552,1573]	-22.60	PREDICTED: NADPH oxidase activator 1 [Salmo salar]
ssa-miR-23b-5p	contig_9563	target from/to=[142,163]	-22.60	PREDICTED: uncharacterized protein LOC106586556 [Salmo salar]
ssa-miR-150-3p	contig_11303	target from/to=[1494,1513]	-22.60	PREDICTED: switch-associated protein 70-like [Salmo salar]
ssa-miR-150-3p	contig_11441	target from/to=[76,96]	-22.60	PREDICTED: uncharacterized protein LOC106600457 [Salmo salar]
ssa-miR-19d-5p	contig_14259	target from/to=[2305,2328]	-22.60	PREDICTED: peroxisomal acyl-coenzyme A oxidase 1 isoform X1 [Salmo salar]
ssa-miR-150-3p	contig_14730	target from/to=[1131,1151]	-22.60	PREDICTED: phosphofurin acidic cluster sorting protein 2-like [Salmo salar]
ssa-miR-150-3p	contig_15273	target from/to=[828,849]	-22.60	not available
ssa-miR-150-3p	contig_31656	target from/to=[1745,1766]	-22.60	PREDICTED: zinc finger protein 518A-like isoform X1 [Salmo salar]
ssa-miR-19d-5p	contig_32880	target from/to=[2077,2101]	-22.60	not available
ssa-miR-19d-5p	contig_38616	target from/to=[1128,1149]	-22.60	PREDICTED: uncharacterized protein LOC106582063 isoform X1 [Salmo salar]
ssa-miR-19d-5p	contig_39892	target from/to=[297,321]	-22.60	not available
ssa-miR-150-3p	contig_40113	target from/to=[137,161]	-22.60	PREDICTED: fibroblast growth factor receptor-like 1 isoform X1 [Salmo salar]
ssa-miR-150-3p	contig_40855	target from/to=[53,75]	-22.60	PREDICTED: zinc finger protein 347-like isoform X2 [Salmo salar]
ssa-miR-126-3p	contig_41769	target from/to=[808,829]	-22.60	PREDICTED: uncharacterized protein LOC106601777 [Salmo salar]
ssa-miR-150-3p	contig_48675	target from/to=[1735,1755]	-22.60	PREDICTED: uncharacterized protein LOC106609103 isoform X4 [Salmo salar]
ssa-miR-19d-5p	contig_50582	target from/to=[17,41]	-22.60	PREDICTED: uncharacterized protein LOC106597293 [Salmo salar]
ssa-miR-92b-3p	contig_51677	target from/to=[328,349]	-22.60	PREDICTED: WD repeat-containing protein 25 isoform X1 [Salmo salar]
ssa-miR-150-3p	contig_65335	target from/to=[267,287]	-22.60	FGF2 [Salmo salar]
ssa-miR-23b-5p	contig_72758	target from/to=[3603,3623]	-22.60	PREDICTED: trinucleotide repeat-containing gene 6C protein-like isoform X3 [Salmo salar]
ssa-miR-150-3p	contig_77602	target from/to=[930,951]	-22.60	PREDICTED: bromodomain-containing protein 1-like, partial [Salmo salar]
ssa-miR-150-3p	contig_79712	target from/to=[863,885]	-22.60	mitogen-activated protein kinase kinase 1 interacting protein [Salmo salar]
ssa-miR-150-3p	contig_91486	target from/to=[518,541]	-22.60	not available
ssa-miR-19d-5p	contig_91675	target from/to=[2272,2294]	-22.60	somatolactin receptor precursor [Salmo salar]
ssa-miR-150-3p	contig_94120	target from/to=[95,114]	-22.60	PREDICTED: uncharacterized protein LOC106597293 [Salmo salar]
ssa-miR-19d-5p	contig_112410	target from/to=[461,485]	-22.60	UPF0527 membrane protein [Salmo salar]
ssa-miR-150-3p	contig_22279	target from/to=[150,173]	-22.60	PREDICTED: extensin-like [Salmo salar]
ssa-miR-150-3p	contig_39799	target from/to=[81,102]	-22.60	PREDICTED: poly [ADP-ribose] polymerase 14-like isoform X2 [Salmo salar]
ssa-miR-30a-3p	contig_49748	target from/to=[2145,2167]	-22.60	PREDICTED: leiomodin-1-like isoform X1 [Salmo salar]
ssa-miR-23b-5p	contig_53475	target from/to=[36,54]	-22.60	PREDICTED: calcitonin gene-related peptide type 1 receptor-like [Salmo salar]
ssa-miR-19d-5p	contig_56161	target from/to=[1509,1535]	-22.60	PREDICTED: procollagen galactosyltransferase 2-like [Salmo salar]
ssa-miR-150-3p	contig_77756	target from/to=[399,419]	-22.60	PREDICTED: uncharacterized protein LOC106569078 [Salmo salar]
ssa-miR-8163-5p	contig_1244	target from/to=[1361,1383]	-22.50	PREDICTED: 40S ribosomal protein S5-like [Salmo salar]
ssa-miR-365-5p	contig_3529	target from/to=[1700,1719]	-22.50	PREDICTED: keratin, type I cytoskeletal 18-like isoform X1 [Salmo salar]
ssa-miR-214-5p	contig_14971	target from/to=[613,635]	-22.50	PREDICTED: putative sodium-coupled neutral amino acid transporter 10 isoform X10 [Salmo salar]
ssa-miR-133a-3p	contig_15504	target from/to=[572,593]	-22.50	PREDICTED: progestin and adipoQ receptor family member 9 [Salmo salar]
ssa-miR-365-5p	contig_16762	target from/to=[791,811]	-22.50	SPATA5 [Salmo salar]
ssa-miR-19c-3-5p	contig_19255	target from/to=[1307,1329]	-22.50	PREDICTED: fibronectin type-III domain-containing protein 3A-like, partial [Salmo salar]
ssa-miR-8163-5p	contig_23784	target from/to=[1344,1368]	-22.50	PREDICTED: zinc transporter ZIP3-like [Salmo salar]
ssa-miR-199a-5p	contig_36964	target from/to=[1578,1600]	-22.50	28S ribosomal protein S18a, mitochondrial precursor [Salmo salar]
ssa-miR-133a-3p	contig_38184	target from/to=[1026,1046]	-22.50	Deoxyribonuclease gamma precursor [Salmo salar]
ssa-miR-19c-3-5p	contig_38919	target from/to=[2,26]	-22.50	PREDICTED: FYVE, RhoGEF and PH domain-containing protein 4-like isoform X2 [Salmo salar]
ssa-miR-17-5p	contig_43271	target from/to=[2273,2298]	-22.50	PREDICTED: leucine-rich repeat flightless-interacting protein 1-like isoform X3 [Salmo salar]
ssa-miR-429-5p	contig_44145	target from/to=[1052,1069]	-22.50	PREDICTED: rho GTPase-activating protein 20-like [Salmo salar]
ssa-miR-133a-3p	contig_44145	target from/to=[3282,3304]	-22.50	PREDICTED: rho GTPase-activating protein 20-like [Salmo salar]
ssa-miR-133b-3p	contig_44145	target from/to=[3284,3305]	-22.50	PREDICTED: rho GTPase-activating protein 20-like [Salmo salar]
ssa-miR-214-5p	contig_50532	target from/to=[2261,2283]	-22.50	PREDICTED: uncharacterized protein LOC106587367 isoform X1 [Salmo salar]
ssa-miR-133a-3p	contig_52929	target from/to=[2014,2035]	-22.50	PREDICTED: midasin-like [Salmo salar]
ssa-miR-204-5p	contig_62529	target from/to=[666,688]	-22.50	PREDICTED: microtubule-associated protein 2-like isoform X10 [Salmo salar]
ssa-miR-8163-5p	contig_62529	target from/to=[2896,2919]	-22.50	PREDICTED: microtubule-associated protein 2-like isoform X10 [Salmo salar]
ssa-miR-214-5p	contig_79836	target from/to=[678,698]	-22.50	PREDICTED: formin-like protein 5 isoform X3 [Salmo salar]
ssa-miR-138-5p	contig_86166	target from/to=[776,798]	-22.50	PREDICTED: roquin-1-like isoform X1 [Salmo salar]
ssa-miR-133a-3p	contig_3565	target from/to=[529,550]	-22.50	PREDICTED: TP53-regulating kinase-like [Salmo salar]
ssa-miR-456-5p	contig_14679	target from/to=[1812,1831]	-22.50	PREDICTED: E3 ubiquitin-protein ligase TRIM39-like isoform X1 [Salmo salar]
ssa-miR-17-5p	contig_24081	target from/to=[1542,1564]	-22.50	PREDICTED: dentin sialophosphoprotein-like [Salmo salar]
ssa-miR-200a-2-5p	contig_107931	target from/to=[3280,3301]	-22.50	PREDICTED: collagen alpha-1(VIII) chain-like [Salmo salar]
ssa-miR-19d-5p	contig_902	target from/to=[1408,1432]	-22.50	PREDICTED: heat shock protein HSP 90-beta isoform X1 [Salmo salar]
ssa-miR-125b-1-3p	contig_3337	target from/to=[345,365]	-22.50	PREDICTED: uncharacterized protein LOC106569888, partial [Salmo salar]
ssa-miR-23b-5p	contig_4571	target from/to=[1041,1059]	-22.50	Glutathione S-transferase P [Salmo salar]
ssa-miR-30a-3p	contig_6386	target from/to=[2637,2656]	-22.50	PREDICTED: glucocorticoid receptor-like isoform X2 [Salmo salar]
ssa-miR-222b-5p	contig_6856	target from/to=[2499,2520]	-22.50	PREDICTED: vinculin isoform X2 [Salmo salar]
ssa-miR-150-3p	contig_9259	target from/to=[29,50]	-22.50	PREDICTED: histone-lysine N-methyltransferase 2B-like isoform X2 [Salmo salar]
ssa-miR-150-3p	contig_11625	target from/to=[1355,1378]	-22.50	PREDICTED: uncharacterized protein LOC106600457 [Salmo salar]
ssa-miR-150-3p	contig_11857	target from/to=[299,320]	-22.50	PREDICTED: uncharacterized protein LOC106567895 [Salmo salar]
ssa-miR-150-3p	contig_11916	target from/to=[2293,2316]	-22.50	hypothetical protein, partial [Salmo salar]
ssa-miR-19d-5p	contig_12225	target from/to=[416,439]	-22.50	PREDICTED: myosin-14-like [Salmo salar]
ssa-miR-2188-3p	contig_15096	target from/to=[7625,7646]	-22.50	PREDICTED: basement membrane-specific heparan sulfate proteoglycan core protein-like isoform X18 [Salmo salar]
ssa-miR-19d-5p	contig_23390	target from/to=[1376,1399]	-22.50	PREDICTED: RNA/RNP complex-1-interacting phosphatase isoform X2 [Salmo salar]
ssa-miR-92b-3p	contig_31121	target from/to=[1193,1212]	-22.50	not available
ssa-miR-19d-5p	contig_32034	target from/to=[187,215]	-22.50	PREDICTED: uncharacterized protein LOC106591102 [Salmo salar]
ssa-miR-19d-5p	contig_33173	target from/to=[1202,1226]	-22.50	28S ribosomal protein S35, mitochondrial precursor [Salmo salar]
ssa-miR-181a-4-3p	contig_33698	target from/to=[1374,1397]	-22.50	PREDICTED: whirlin-like isoform X2 [Salmo salar]
ssa-miR-150-3p	contig_40113	target from/to=[1773,1791]	-22.50	PREDICTED: fibroblast growth factor receptor-like 1 isoform X1 [Salmo salar]
ssa-miR-19d-5p	contig_44891	target from/to=[389,414]	-22.50	PREDICTED: vegetative cell wall protein gp1-like [Salmo salar]
ssa-miR-150-3p	contig_45666	target from/to=[864,886]	-22.50	not available
ssa-miR-150-3p	contig_45701	target from/to=[2031,2051]	-22.50	PREDICTED: phosphatidylinositol 3,4,5-trisphosphate-dependent Rac exchanger 1 protein-like isoform X1 [Salmo salar]
ssa-miR-150-3p	contig_56569	target from/to=[197,215]	-22.50	PREDICTED: tRNA:m(4)X modification enzyme TRM13 homolog isoform X1 [Salmo salar]
ssa-miR-19d-5p	contig_66278	target from/to=[274,298]	-22.50	SPATA5 [Salmo salar]
ssa-miR-19d-5p	contig_66883	target from/to=[1801,1823]	-22.50	PREDICTED: uncharacterized protein LOC106600757 [Salmo salar]
ssa-miR-19d-5p	contig_72810	target from/to=[2973,2995]	-22.50	PREDICTED: mitochondrial dynamics protein MID51-like isoform X2 [Salmo salar]
ssa-miR-150-3p	contig_74429	target from/to=[1151,1171]	-22.50	PREDICTED: zinc finger protein 11-like [Salmo salar]
ssa-miR-2188-3p	contig_95005	target from/to=[1374,1394]	-22.50	PREDICTED: protein RUFY3 isoform X3 [Salmo salar]
ssa-miR-19d-5p	contig_100234	target from/to=[505,528]	-22.50	PREDICTED: phosphorylase b kinase regulatory subunit beta isoform X3 [Salmo salar]
ssa-miR-30a-3p	contig_107183	target from/to=[1572,1595]	-22.50	PREDICTED: uncharacterized protein LOC106599233 [Salmo salar]
ssa-miR-19d-5p	contig_142545	target from/to=[237,261]	-22.50	PREDICTED: protein phosphatase 1 regulatory subunit 35-like isoform X2 [Salmo salar]
ssa-miR-92b-3p	contig_3735	target from/to=[2797,2818]	-22.50	PREDICTED: myosin light chain kinase, smooth muscle-like isoform X3 [Salmo salar]
ssa-miR-19d-5p	contig_3892	target from/to=[1592,1615]	-22.50	PREDICTED: collagen alpha-1(X) chain-like [Salmo salar]
ssa-miR-30a-3p	contig_9652	target from/to=[259,282]	-22.50	PREDICTED: CB055 protein isoform X3 [Salmo salar]
ssa-miR-150-3p	contig_10021	target from/to=[1198,1217]	-22.50	not available
ssa-miR-30a-3p	contig_22279	target from/to=[482,501]	-22.50	PREDICTED: extensin-like [Salmo salar]
ssa-miR-19d-5p	contig_34075	target from/to=[146,169]	-22.50	PREDICTED: arabinogalactan protein 1-like [Salmo salar]
ssa-miR-150-3p	contig_41523	target from/to=[2758,2780]	-22.50	PREDICTED: heat shock 70 kDa protein 12B-like [Salmo salar]
ssa-miR-150-3p	contig_56411	target from/to=[2161,2181]	-22.50	PREDICTED: WNT1-inducible-signaling pathway protein 1-like [Salmo salar]
ssa-miR-19d-5p	contig_70148	target from/to=[697,719]	-22.50	PREDICTED: bromodomain-containing protein 1-like, partial [Salmo salar]
ssa-miR-26a-3-3p	contig_966	target from/to=[4439,4460]	-22.40	Cathepsin B precursor [Salmo salar]
ssa-miR-199a-3p	contig_1185	target from/to=[1099,1119]	-22.40	PREDICTED: tropomyosin alpha-1 chain-like, partial [Salmo salar]
ssa-miR-214-5p	contig_2319	target from/to=[30,51]	-22.40	PREDICTED: THO complex subunit 6 homolog [Salmo salar]
ssa-miR-456-5p	contig_5267	target from/to=[2413,2434]	-22.40	PREDICTED: 26S proteasome non-ATPase regulatory subunit 1 isoform X1 [Salmo salar]
ssa-miR-138-5p	contig_10968	target from/to=[1365,1385]	-22.40	PREDICTED: interferon-induced GTP-binding protein Mx-like isoform X2 [Salmo salar]
ssa-miR-206-3p	contig_11238	target from/to=[5103,5123]	-22.40	PREDICTED: synaptotagmin-like protein 2 isoform X5 [Salmo salar]
ssa-miR-214-5p	contig_11247	target from/to=[2350,2371]	-22.40	Glutamate decarboxylase-like protein 1 [Salmo salar]
ssa-miR-214-5p	contig_13985	target from/to=[1008,1029]	-22.40	PREDICTED: LOW QUALITY PROTEIN: integrin alpha-L-like [Salmo salar]
ssa-miR-365-5p	contig_19840	target from/to=[331,351]	-22.40	PREDICTED: gastrula zinc finger protein xLCGF3.1-like [Salmo salar]
ssa-miR-204-5p	contig_19871	target from/to=[962,985]	-22.40	PREDICTED: cell division cycle-associated protein 3-like [Salmo salar]
ssa-miR-200a-2-5p	contig_26471	target from/to=[406,427]	-22.40	not available
ssa-miR-138-5p	contig_28380	target from/to=[290,312]	-22.40	PREDICTED: zinc finger MYND domain-containing protein 11 isoform X4 [Salmo salar]
ssa-miR-204-5p	contig_31121	target from/to=[1112,1131]	-22.40	not available
ssa-miR-133a-3p	contig_37080	target from/to=[1056,1081]	-22.40	PREDICTED: uncharacterized protein LOC106589469 [Salmo salar]
ssa-miR-106b-5p	contig_43271	target from/to=[2275,2298]	-22.40	PREDICTED: leucine-rich repeat flightless-interacting protein 1-like isoform X3 [Salmo salar]
ssa-miR-8163-5p	contig_44145	target from/to=[555,578]	-22.40	PREDICTED: rho GTPase-activating protein 20-like [Salmo salar]
ssa-miR-204-5p	contig_45875	target from/to=[2313,2334]	-22.40	PREDICTED: uncharacterized protein LOC106600457 [Salmo salar]
ssa-miR-204-5p	contig_45875	target from/to=[2474,2494]	-22.40	PREDICTED: uncharacterized protein LOC106600457 [Salmo salar]
ssa-miR-2184-3p	contig_46727	target from/to=[1279,1301]	-22.40	Myelin protein zero-like protein 2 precursor [Salmo salar]
ssa-miR-138-5p	contig_57175	target from/to=[471,496]	-22.40	Transposable element Tc1 transposase [Salmo salar]
ssa-miR-133a-3p	contig_60608	target from/to=[317,340]	-22.40	PREDICTED: arf-GAP domain and FG repeat-containing protein 1-like isoform X2 [Salmo salar]
ssa-miR-214-5p	contig_64846	target from/to=[881,902]	-22.40	PREDICTED: E3 ubiquitin-protein ligase KEG-like [Salmo salar]
ssa-miR-204-5p	contig_73174	target from/to=[865,887]	-22.40	PREDICTED: uncharacterized protein LOC106607433 [Salmo salar]
ssa-miR-21b-5p	contig_91963	target from/to=[364,388]	-22.40	not available
ssa-miR-214-5p	contig_112410	target from/to=[2387,2409]	-22.40	UPF0527 membrane protein [Salmo salar]
ssa-miR-19c-3-5p	contig_112410	target from/to=[2367,2389]	-22.40	UPF0527 membrane protein [Salmo salar]
ssa-miR-138-5p	contig_150132	target from/to=[643,665]	-22.40	PREDICTED: uncharacterized protein LOC106590369 [Salmo salar]
ssa-miR-206-3p	contig_21084	target from/to=[3236,3256]	-22.40	PREDICTED: collagen alpha-1(IV) chain-like [Salmo salar]
ssa-miR-499b-5p	contig_29630	target from/to=[797,818]	-22.40	PREDICTED: dual specificity protein phosphatase 2-like [Salmo salar]
ssa-miR-214-5p	contig_50978	target from/to=[1514,1535]	-22.40	PREDICTED: solute carrier family 22 member 13-like isoform X1 [Salmo salar]
ssa-miR-21a-2-3p	contig_107671	target from/to=[1170,1191]	-22.40	PREDICTED: CXADR-like membrane protein [Salmo salar]
ssa-miR-21b-3p	contig_107671	target from/to=[1170,1191]	-22.40	PREDICTED: CXADR-like membrane protein [Salmo salar]
ssa-miR-138-5p	contig_109200	target from/to=[3051,3073]	-22.40	PREDICTED: sodium bicarbonate transporter-like protein 11 isoform X2 [Salmo salar]
ssa-miR-150-3p	contig_8834	target from/to=[1457,1476]	-22.40	PREDICTED: G1/S-specific cyclin-D2-like [Salmo salar]
ssa-miR-19d-5p	contig_9777	target from/to=[1805,1828]	-22.40	PREDICTED: uncharacterized protein LOC106562778 [Salmo salar]
ssa-miR-150-3p	contig_12322	target from/to=[2189,2212]	-22.40	PREDICTED: protein FAM160B1 [Salmo salar]
ssa-miR-150-3p	contig_12352	target from/to=[4361,4379]	-22.40	Amidophosphoribosyltransferase precursor [Salmo salar]
ssa-miR-150-3p	contig_12433	target from/to=[87,107]	-22.40	Elongation factor 2 [Salmo salar]
ssa-miR-2188-3p	contig_14355	target from/to=[275,299]	-22.40	Transposable element Tcb1 transposase [Salmo salar]
ssa-miR-150-3p	contig_15412	target from/to=[13,32]	-22.40	PREDICTED: adenosylhomocysteinase 2-like isoform X3 [Salmo salar]
ssa-miR-125b-1-3p	contig_19545	target from/to=[304,322]	-22.40	PREDICTED: serine--tRNA ligase, mitochondrial-like [Salmo salar]
ssa-miR-19d-5p	contig_27700	target from/to=[1058,1080]	-22.40	PREDICTED: ataxin-2-like isoform X12 [Salmo salar]
ssa-miR-19d-5p	contig_30440	target from/to=[2208,2233]	-22.40	PREDICTED: rab11 family-interacting protein 2-like [Salmo salar]
ssa-miR-19d-5p	contig_31250	target from/to=[2616,2638]	-22.40	PREDICTED: glutamyl-tRNA(Gln) amidotransferase subunit A, mitochondrial [Salmo salar]
ssa-miR-150-3p	contig_32037	target from/to=[1538,1560]	-22.40	PREDICTED: solute carrier family 17 member 9-like [Salmo salar]
ssa-miR-19d-5p	contig_32744	target from/to=[1800,1823]	-22.40	PREDICTED: protein orai-2 isoform X1 [Salmo salar]
ssa-miR-150-3p	contig_35890	target from/to=[528,548]	-22.40	not available
ssa-miR-150-3p	contig_36556	target from/to=[3775,3799]	-22.40	PREDICTED: protein TMEPAI isoform X4 [Salmo salar]
ssa-miR-150-3p	contig_43555	target from/to=[182,200]	-22.40	PREDICTED: tRNA:m(4)X modification enzyme TRM13 homolog isoform X1 [Salmo salar]
ssa-miR-30a-3p	contig_44891	target from/to=[213,235]	-22.40	PREDICTED: vegetative cell wall protein gp1-like [Salmo salar]
ssa-miR-150-3p	contig_45601	target from/to=[594,613]	-22.40	PREDICTED: semaphorin-4B-like [Salmo salar]
ssa-miR-150-3p	contig_45695	target from/to=[259,283]	-22.40	PREDICTED: uncharacterized protein LOC106564134, partial [Salmo salar]
ssa-miR-23b-5p	contig_45701	target from/to=[2697,2715]	-22.40	PREDICTED: phosphatidylinositol 3,4,5-trisphosphate-dependent Rac exchanger 1 protein-like isoform X1 [Salmo salar]
ssa-miR-30a-3p	contig_45885	target from/to=[1540,1561]	-22.40	PREDICTED: receptor-type tyrosine-protein phosphatase R [Salmo salar]
ssa-miR-150-3p	contig_46493	target from/to=[557,577]	-22.40	PREDICTED: uncharacterized protein LOC106562497, partial [Salmo salar]
ssa-miR-30a-3p	contig_51677	target from/to=[1776,1799]	-22.40	PREDICTED: WD repeat-containing protein 25 isoform X1 [Salmo salar]
ssa-miR-23b-5p	contig_72759	target from/to=[2562,2581]	-22.40	PREDICTED: trinucleotide repeat-containing gene 6C protein-like isoform X5 [Salmo salar]
ssa-miR-19d-5p	contig_72768	target from/to=[947,973]	-22.40	PREDICTED: uncharacterized protein LOC106589998 [Salmo salar]
ssa-miR-30a-3p	contig_84536	target from/to=[336,359]	-22.40	PREDICTED: rano class II histocompatibility antigen, B alpha chain-like [Salmo salar]
ssa-miR-150-3p	contig_85782	target from/to=[30,49]	-22.40	PREDICTED: uncharacterized protein LOC106597293 [Salmo salar]
ssa-miR-150-3p	contig_91095	target from/to=[778,800]	-22.40	PREDICTED: uncharacterized protein C12orf43-like isoform X1 [Salmo salar]
ssa-miR-19d-5p	contig_114012	target from/to=[640,662]	-22.40	not available
ssa-miR-23b-5p	contig_4509	target from/to=[2743,2760]	-22.40	PREDICTED: protein MCM10 homolog [Salmo salar]
ssa-miR-150-3p	contig_4720	target from/to=[435,453]	-22.40	PREDICTED: tRNA:m(4)X modification enzyme TRM13 homolog isoform X1 [Salmo salar]
ssa-miR-19d-5p	contig_5582	target from/to=[1834,1859]	-22.40	PREDICTED: ATP-sensitive inward rectifier potassium channel 1-like [Salmo salar]
ssa-miR-150-3p	contig_18495	target from/to=[4399,4417]	-22.40	PREDICTED: tRNA:m(4)X modification enzyme TRM13 homolog isoform X1 [Salmo salar]
ssa-miR-19d-5p	contig_19774	target from/to=[171,194]	-22.40	PREDICTED: laminin subunit alpha-4-like [Salmo salar]
ssa-miR-150-3p	contig_19774	target from/to=[3699,3719]	-22.40	PREDICTED: laminin subunit alpha-4-like [Salmo salar]
ssa-miR-150-3p	contig_26141	target from/to=[1382,1404]	-22.40	PREDICTED: Fanconi anemia-associated protein of 20 kDa [Salmo salar]
ssa-miR-2188-3p	contig_26236	target from/to=[357,376]	-22.40	PREDICTED: smoothelin-like isoform X7 [Salmo salar]
ssa-miR-301b-5p	contig_30530	target from/to=[1887,1907]	-22.40	PREDICTED: actin filament-associated protein 1-like 2 isoform X2 [Salmo salar]
ssa-miR-2188-3p	contig_34742	target from/to=[659,679]	-22.40	Transposable element Tcb1 transposase [Salmo salar]
ssa-miR-150-3p	contig_40317	target from/to=[1740,1763]	-22.40	immunglobulin tau-5 heavy chain constant region, partial [Salmo salar]
ssa-miR-150-3p	contig_98614	target from/to=[508,528]	-22.40	PREDICTED: laminin subunit alpha-2 [Salmo salar]
ssa-miR-23b-5p	contig_107671	target from/to=[987,1004]	-22.40	PREDICTED: CXADR-like membrane protein [Salmo salar]
ssa-miR-150-3p	contig_109388	target from/to=[1002,1025]	-22.40	PREDICTED: HEAT repeat-containing protein 1 [Salmo salar]
ssa-miR-150-3p	contig_110241	target from/to=[776,797]	-22.40	PREDICTED: CCR4-NOT transcription complex subunit 2-like [Salmo salar]
ssa-miR-19d-5p	contig_129921	target from/to=[1020,1040]	-22.40	ORF2 protein [Salmo salar]
ssa-miR-150-3p	contig_158027	target from/to=[1056,1076]	-22.40	PREDICTED: brain-derived neurotrophic factor-like isoform X1 [Salmo salar]
ssa-miR-301c-5p	contig_6917	target from/to=[1341,1361]	-22.30	PREDICTED: pollen-specific leucine-rich repeat extensin-like protein 1 [Salmo salar]
ssa-miR-449a-5p	contig_17458	target from/to=[3771,3795]	-22.30	PREDICTED: SEC14-like protein 2 [Salmo salar]
ssa-miR-122-5p	contig_27125	target from/to=[705,727]	-22.30	PREDICTED: zinc finger BED domain-containing protein 4-like [Salmo salar]
ssa-miR-214-5p	contig_28489	target from/to=[1371,1390]	-22.30	PREDICTED: ras and Rab interactor 2-like [Salmo salar]
ssa-miR-199a-5p	contig_30440	target from/to=[4002,4025]	-22.30	PREDICTED: rab11 family-interacting protein 2-like [Salmo salar]
ssa-miR-214-5p	contig_30620	target from/to=[2382,2405]	-22.30	PREDICTED: solute carrier family 12 member 7-like isoform X4 [Salmo salar]
ssa-miR-214-5p	contig_30911	target from/to=[3523,3542]	-22.30	SPATA5 [Salmo salar]
ssa-miR-21b-3p	contig_31835	target from/to=[1152,1171]	-22.30	PREDICTED: dematin isoform X5 [Salmo salar]
ssa-miR-199a-5p	contig_32576	target from/to=[1695,1717]	-22.30	PREDICTED: cholinesterase-like isoform X3 [Salmo salar]
ssa-miR-449a-5p	contig_36489	target from/to=[1061,1082]	-22.30	PREDICTED: gap junction beta-4 protein-like [Salmo salar]
ssa-miR-21a-2-3p	contig_41396	target from/to=[306,326]	-22.30	transposase [Salmo salar]
ssa-miR-21b-3p	contig_41396	target from/to=[306,326]	-22.30	transposase [Salmo salar]
ssa-miR-155-5p	contig_66061	target from/to=[3822,3842]	-22.30	not available
ssa-miR-21b-5p	contig_67262	target from/to=[682,705]	-22.30	COL11A2, partial [Salmo salar]
ssa-miR-19c-3-5p	contig_75151	target from/to=[1453,1475]	-22.30	PREDICTED: uncharacterized protein LOC106600457 [Salmo salar]
ssa-miR-133a-3p	contig_77229	target from/to=[40,60]	-22.30	heat shock protein 90-alpha 1 [Salmo salar]
ssa-miR-204-5p	contig_80987	target from/to=[1358,1380]	-22.30	PREDICTED: uncharacterized protein LOC106597293 [Salmo salar]
ssa-miR-8163-5p	contig_81252	target from/to=[1113,1133]	-22.30	PREDICTED: proprotein convertase subtilisin/kexin type 5-like isoform X1 [Salmo salar]
ssa-miR-133b-3p	contig_81839	target from/to=[584,604]	-22.30	PREDICTED: uncharacterized protein LOC106568450 [Salmo salar]
ssa-miR-199a-3p	contig_83245	target from/to=[936,957]	-22.30	PREDICTED: max dimerization protein 1 isoform X3 [Salmo salar]
ssa-miR-204-5p	contig_91141	target from/to=[72,94]	-22.30	PREDICTED: acyl-CoA-binding domain-containing protein 6-like isoform X1 [Salmo salar]
ssa-miR-204-5p	contig_122361	target from/to=[14,35]	-22.30	PREDICTED: ataxin-1-like, partial [Salmo salar]
ssa-miR-199a-5p	contig_4018	target from/to=[1558,1577]	-22.30	not available
ssa-miR-199a-5p	contig_5064	target from/to=[772,797]	-22.30	PREDICTED: matrix metalloproteinase-15-like [Salmo salar]
ssa-miR-122-5p	contig_7680	target from/to=[3332,3350]	-22.30	PREDICTED: collagen alpha-1(XXIII) chain-like isoform X7 [Salmo salar]
ssa-miR-138-5p	contig_25906	target from/to=[1469,1490]	-22.30	PREDICTED: vitrin isoform X1 [Salmo salar]
ssa-miR-214-5p	contig_26236	target from/to=[1887,1906]	-22.30	PREDICTED: smoothelin-like isoform X7 [Salmo salar]
ssa-miR-138-5p	contig_49748	target from/to=[4251,4274]	-22.30	PREDICTED: leiomodin-1-like isoform X1 [Salmo salar]
ssa-miR-456-5p	contig_93482	target from/to=[60,79]	-22.30	PREDICTED: bromodomain-containing protein 1-like, partial [Salmo salar]
ssa-miR-199a-5p	contig_96765	target from/to=[791,812]	-22.30	PREDICTED: uncharacterized protein LOC106565877 isoform X2 [Salmo salar]
ssa-miR-144-5p	contig_1617	target from/to=[969,991]	-22.30	not available
ssa-miR-30a-3p	contig_2569	target from/to=[3018,3042]	-22.30	PREDICTED: exocyst complex component 3-like [Salmo salar]
ssa-miR-150-3p	contig_6388	target from/to=[308,331]	-22.30	transposase [Salmo salar]
ssa-miR-19d-5p	contig_7080	target from/to=[3920,3941]	-22.30	PREDICTED: NUAK family SNF1-like kinase 1 [Salmo salar]
ssa-miR-375-5p	contig_12324	target from/to=[1421,1440]	-22.30	Hydroxyacyl-coenzyme A dehydrogenase, mitochondrial precursor [Salmo salar]
ssa-miR-150-3p	contig_14741	target from/to=[717,739]	-22.30	PREDICTED: oocyte zinc finger protein XlCOF6-like [Salmo salar]
ssa-miR-23b-5p	contig_15528	target from/to=[3705,3722]	-22.30	PREDICTED: zinc finger and BTB domain-containing protein 34-like [Salmo salar]
ssa-miR-19d-5p	contig_15627	target from/to=[1415,1440]	-22.30	PREDICTED: protein-glutamine gamma-glutamyltransferase 2-like [Salmo salar]
ssa-miR-150-3p	contig_17594	target from/to=[1037,1060]	-22.30	hypothetical protein, partial [Salmo salar]
ssa-miR-19d-5p	contig_18732	target from/to=[2686,2710]	-22.30	PREDICTED: serine--tRNA ligase, mitochondrial isoform X2 [Salmo salar]
ssa-miR-23b-5p	contig_18822	target from/to=[952,970]	-22.30	Transposable element Tcb1 transposase [Salmo salar]
ssa-miR-19d-5p	contig_23640	target from/to=[1022,1046]	-22.30	PREDICTED: zinc finger CCCH domain-containing protein 13-like [Salmo salar]
ssa-miR-19d-5p	contig_30721	target from/to=[125,149]	-22.30	Transmembrane and TPR repeat-containing protein 4 [Salmo salar]
ssa-miR-19d-5p	contig_38642	target from/to=[510,531]	-22.30	PREDICTED: phospholipase A-2-activating protein isoform X1 [Salmo salar]
ssa-miR-23b-5p	contig_45067	target from/to=[727,748]	-22.30	PREDICTED: bromodomain-containing protein 1-like, partial [Salmo salar]
ssa-miR-150-3p	contig_45695	target from/to=[1605,1627]	-22.30	PREDICTED: uncharacterized protein LOC106564134, partial [Salmo salar]
ssa-miR-19d-5p	contig_45701	target from/to=[1840,1867]	-22.30	PREDICTED: phosphatidylinositol 3,4,5-trisphosphate-dependent Rac exchanger 1 protein-like isoform X1 [Salmo salar]
ssa-miR-150-3p	contig_46223	target from/to=[2345,2365]	-22.30	PREDICTED: protein argonaute-2 isoform X8 [Salmo salar]
ssa-miR-19d-5p	contig_49127	target from/to=[1741,1766]	-22.30	PREDICTED: FERM domain-containing protein 4A-like isoform X6 [Salmo salar]
ssa-miR-19d-5p	contig_52929	target from/to=[1725,1751]	-22.30	PREDICTED: midasin-like [Salmo salar]
ssa-miR-2188-3p	contig_56723	target from/to=[461,481]	-22.30	PREDICTED: dematin isoform X5 [Salmo salar]
ssa-miR-23b-5p	contig_62529	target from/to=[1267,1285]	-22.30	PREDICTED: microtubule-associated protein 2-like isoform X10 [Salmo salar]
ssa-miR-150-3p	contig_62529	target from/to=[1542,1566]	-22.30	PREDICTED: microtubule-associated protein 2-like isoform X10 [Salmo salar]
ssa-miR-23b-5p	contig_88503	target from/to=[1045,1064]	-22.30	PREDICTED: arfaptin-2-like isoform X7 [Salmo salar]
ssa-miR-19d-5p	contig_91675	target from/to=[2389,2415]	-22.30	somatolactin receptor precursor [Salmo salar]
ssa-miR-125b-1-3p	contig_100685	target from/to=[2194,2215]	-22.30	PREDICTED: KN motif and ankyrin repeat domain-containing protein 4-like [Salmo salar]
ssa-miR-30a-3p	contig_122361	target from/to=[1532,1551]	-22.30	PREDICTED: ataxin-1-like, partial [Salmo salar]
ssa-miR-19d-5p	contig_28467	target from/to=[494,517]	-22.30	High mobility group-T protein [Salmo salar]
ssa-miR-150-3p	contig_32221	target from/to=[496,518]	-22.30	not available
ssa-miR-150-3p	contig_43877	target from/to=[1815,1833]	-22.30	PREDICTED: M-protein, striated muscle-like isoform X1 [Salmo salar]
ssa-miR-150-3p	contig_52075	target from/to=[86,108]	-22.30	interleukin-17A/F3 [Salmo salar]
ssa-miR-19d-5p	contig_57089	target from/to=[389,418]	-22.30	PREDICTED: brefeldin A-inhibited guanine nucleotide-exchange protein 3 isoform X5 [Salmo salar]
ssa-miR-150-3p	contig_75688	target from/to=[1290,1309]	-22.30	PREDICTED: uncharacterized protein KIAA0408-like isoform X2 [Salmo salar]
ssa-miR-19d-5p	contig_113162	target from/to=[3243,3263]	-22.30	PREDICTED: fibrillin-2 [Salmo salar]
ssa-miR-150-3p	contig_117751	target from/to=[592,614]	-22.30	PREDICTED: ethanolamine kinase 1-like [Salmo salar]
ssa-miR-138-5p	contig_659	target from/to=[3730,3751]	-22.20	PREDICTED: golgin subfamily B member 1-like isoform X3 [Salmo salar]
ssa-miR-138-5p	contig_1711	target from/to=[623,650]	-22.20	PREDICTED: transmembrane protease serine 9-like isoform X2 [Salmo salar]
ssa-miR-8163-5p	contig_3610	target from/to=[1392,1414]	-22.20	PREDICTED: dematin isoform X2 [Salmo salar]
ssa-miR-204-5p	contig_4450	target from/to=[876,897]	-22.20	PREDICTED: NK-tumor recognition protein [Salmo salar]
ssa-miR-204-5p	contig_6063	target from/to=[1434,1458]	-22.20	PREDICTED: uncharacterized protein LOC106611326 isoform X1 [Salmo salar]
ssa-miR-21b-3p	contig_12360	target from/to=[3170,3192]	-22.20	hypothetical protein [Salmo salar]
ssa-miR-19c-3-5p	contig_13658	target from/to=[1372,1394]	-22.20	PREDICTED: transmembrane protein C5orf28 homolog [Salmo salar]
ssa-miR-29c-3p	contig_15573	target from/to=[2510,2535]	-22.20	PREDICTED: FERM, RhoGEF and pleckstrin domain-containing protein 1-like, partial [Salmo salar]
ssa-miR-21b-5p	contig_26502	target from/to=[64,87]	-22.20	PREDICTED: muscleblind-like protein 1 isoform X9 [Salmo salar]
ssa-miR-193-3p	contig_31121	target from/to=[1192,1212]	-22.20	not available
ssa-miR-204-5p	contig_33698	target from/to=[1067,1087]	-22.20	PREDICTED: whirlin-like isoform X2 [Salmo salar]
ssa-miR-204-5p	contig_45221	target from/to=[846,867]	-22.20	PREDICTED: manganese-transporting ATPase 13A1-like isoform X4 [Salmo salar]
ssa-miR-138-5p	contig_46223	target from/to=[3587,3610]	-22.20	PREDICTED: protein argonaute-2 isoform X8 [Salmo salar]
ssa-miR-199a-5p	contig_48851	target from/to=[851,873]	-22.20	PREDICTED: gastrula zinc finger protein XlCGF57.1-like isoform X1 [Salmo salar]
ssa-miR-26a-3-3p	contig_56351	target from/to=[425,446]	-22.20	PREDICTED: uncharacterized protein LOC106604997, partial [Salmo salar]
ssa-miR-21a-2-3p	contig_60474	target from/to=[237,258]	-22.20	PREDICTED: lisH domain and HEAT repeat-containing protein KIAA1468 homolog isoform X2 [Salmo salar]
ssa-miR-138-5p	contig_62592	target from/to=[638,662]	-22.20	PREDICTED: protein LDOC1L-like [Salmo salar]
ssa-miR-17-5p	contig_64777	target from/to=[1960,1980]	-22.20	PREDICTED: sphingosine-1-phosphate phosphatase 2-like isoform X1 [Salmo salar]
ssa-miR-122-5p	contig_66245	target from/to=[1628,1651]	-22.20	PREDICTED: aftiphilin-like [Salmo salar]
ssa-miR-365-5p	contig_74523	target from/to=[3553,3570]	-22.20	PREDICTED: transcription factor RFX3-like isoform X1 [Salmo salar]
ssa-miR-2184-3p	contig_76791	target from/to=[1838,1858]	-22.20	PREDICTED: BEN domain-containing protein 4-like [Salmo salar]
ssa-miR-122-5p	contig_79762	target from/to=[2315,2335]	-22.20	PREDICTED: sphingosine-1-phosphate phosphatase 2-like isoform X1 [Salmo salar]
ssa-miR-2184-3p	contig_111227	target from/to=[97,119]	-22.20	PREDICTED: probable GH family 25 lysozyme 3, partial [Salmo salar]
ssa-miR-138-5p	contig_10021	target from/to=[211,238]	-22.20	not available
ssa-miR-199a-5p	contig_18413	target from/to=[989,1012]	-22.20	PREDICTED: laminin subunit alpha-4-like isoform X2 [Salmo salar]
ssa-miR-214-5p	contig_39746	target from/to=[274,293]	-22.20	PREDICTED: cAMP-specific 3',5'-cyclic phosphodiesterase 4D-like [Salmo salar]
ssa-miR-138-5p	contig_43877	target from/to=[2130,2155]	-22.20	PREDICTED: M-protein, striated muscle-like isoform X1 [Salmo salar]
ssa-miR-204-5p	contig_50162	target from/to=[160,180]	-22.20	PREDICTED: FYVE, RhoGEF and PH domain-containing protein 4-like isoform X1 [Salmo salar]
ssa-miR-8163-5p	contig_58693	target from/to=[100,119]	-22.20	not available
ssa-miR-193-3p	contig_85566	target from/to=[2593,2614]	-22.20	PREDICTED: paralemmin-1-like isoform X2 [Salmo salar]
ssa-miR-204-5p	contig_94190	target from/to=[5626,5645]	-22.20	PREDICTED: obscurin-like isoform X1 [Salmo salar]
ssa-miR-214-5p	contig_98614	target from/to=[2993,3015]	-22.20	PREDICTED: laminin subunit alpha-2 [Salmo salar]
ssa-miR-8163-5p	contig_110314	target from/to=[1449,1469]	-22.20	Very long-chain acyl-CoA synthetase [Salmo salar]
ssa-miR-204-5p	contig_122938	target from/to=[390,410]	-22.20	PREDICTED: myocyte-specific enhancer factor 2B [Salmo salar]
ssa-miR-21b-5p	contig_130729	target from/to=[1646,1671]	-22.20	PREDICTED: glucagon receptor-like [Salmo salar]
ssa-miR-19d-5p	contig_2720	target from/to=[1001,1025]	-22.20	PREDICTED: forkhead box protein Q1-like [Salmo salar]
ssa-miR-150-3p	contig_8543	target from/to=[1153,1176]	-22.20	U3 small nucleolar RNA-associated protein 18 homolog [Salmo salar]
ssa-miR-30a-3p	contig_8543	target from/to=[1461,1482]	-22.20	U3 small nucleolar RNA-associated protein 18 homolog [Salmo salar]
ssa-miR-125b-1-3p	contig_10313	target from/to=[1126,1142]	-22.20	not available
ssa-miR-150-3p	contig_10682	target from/to=[155,178]	-22.20	PREDICTED: neuron-specific calcium-binding protein hippocalcin [Salmo salar]
ssa-miR-19d-5p	contig_10837	target from/to=[512,536]	-22.20	PREDICTED: roquin-1-like isoform X1 [Salmo salar]
ssa-miR-150-3p	contig_13860	target from/to=[264,284]	-22.20	PREDICTED: nuclear receptor subfamily 1 group D member 2 [Salmo salar]
ssa-miR-23b-5p	contig_15151	target from/to=[202,222]	-22.20	PREDICTED: uncharacterized protein LOC106597293 [Salmo salar]
ssa-miR-19d-5p	contig_15529	target from/to=[857,881]	-22.20	PREDICTED: uncharacterized protein LOC106591608 isoform X3 [Salmo salar]
ssa-miR-19d-5p	contig_15573	target from/to=[3264,3289]	-22.20	PREDICTED: FERM, RhoGEF and pleckstrin domain-containing protein 1-like, partial [Salmo salar]
ssa-miR-30a-3p	contig_16857	target from/to=[3636,3656]	-22.20	PREDICTED: collagen alpha-6(IV) chain-like isoform X3 [Salmo salar]
ssa-miR-19d-5p	contig_19956	target from/to=[1330,1352]	-22.20	PREDICTED: haptoglobin-like [Salmo salar]
ssa-miR-150-3p	contig_22704	target from/to=[1303,1323]	-22.20	PREDICTED: CAAX prenyl protease 2-like [Salmo salar]
ssa-miR-150-3p	contig_31656	target from/to=[3820,3840]	-22.20	PREDICTED: zinc finger protein 518A-like isoform X1 [Salmo salar]
ssa-miR-150-3p	contig_31657	target from/to=[1984,2004]	-22.20	PREDICTED: zinc finger protein 518A-like [Salmo salar]
ssa-miR-150-3p	contig_32716	target from/to=[1651,1671]	-22.20	PREDICTED: uncharacterized protein LOC106611372 [Salmo salar]
ssa-miR-19d-5p	contig_33006	target from/to=[1730,1752]	-22.20	PREDICTED: SH3 domain and tetratricopeptide repeat-containing protein 1-like [Salmo salar]
ssa-miR-19d-5p	contig_33261	target from/to=[926,950]	-22.20	not available
ssa-miR-222b-5p	contig_35942	target from/to=[1997,2018]	-22.20	PREDICTED: cysteine-rich motor neuron 1 protein-like [Salmo salar]
ssa-miR-150-3p	contig_36318	target from/to=[98,118]	-22.20	PREDICTED: glutamine-dependent NAD(+) synthetase isoform X1 [Salmo salar]
ssa-miR-30a-3p	contig_37201	target from/to=[935,956]	-22.20	PREDICTED: protein NLRC3-like, partial [Salmo salar]
ssa-miR-23b-5p	contig_38005	target from/to=[3085,3105]	-22.20	PREDICTED: transcription activator BRG1-like [Salmo salar]
ssa-miR-150-3p	contig_39767	target from/to=[557,578]	-22.20	UPF0527 membrane protein [Salmo salar]
ssa-miR-19d-5p	contig_40273	target from/to=[454,477]	-22.20	PREDICTED: MAPK/MAK/MRK overlapping kinase-like isoform X5 [Salmo salar]
ssa-miR-150-3p	contig_43638	target from/to=[578,596]	-22.20	PREDICTED: proto-oncogene DBL-like isoform X1 [Salmo salar]
ssa-miR-19d-5p	contig_45701	target from/to=[4633,4657]	-22.20	PREDICTED: phosphatidylinositol 3,4,5-trisphosphate-dependent Rac exchanger 1 protein-like isoform X1 [Salmo salar]
ssa-miR-150-3p	contig_54216	target from/to=[1166,1187]	-22.20	PREDICTED: olfactory receptor 11A1-like [Salmo salar]
ssa-miR-23b-5p	contig_56706	target from/to=[34,52]	-22.20	PREDICTED: UDP-N-acetylglucosamine transporter-like isoform X1 [Salmo salar]
ssa-miR-30a-3p	contig_56957	target from/to=[3176,3198]	-22.20	PREDICTED: tensin-3-like [Salmo salar]
ssa-miR-19d-5p	contig_63387	target from/to=[3502,3524]	-22.20	PREDICTED: GRAM domain-containing protein 1B-like isoform X2 [Salmo salar]
ssa-miR-150-3p	contig_67624	target from/to=[1047,1070]	-22.20	PREDICTED: coiled-coil domain-containing protein 148 [Salmo salar]
ssa-miR-19d-5p	contig_69039	target from/to=[405,429]	-22.20	PREDICTED: mitochondrial carrier homolog 1-like isoform X2 [Salmo salar]
ssa-miR-150-3p	contig_70653	target from/to=[777,798]	-22.20	PREDICTED: mitochondrial Rho GTPase 1-A-like isoform X2 [Salmo salar]
ssa-miR-19d-5p	contig_71249	target from/to=[1204,1228]	-22.20	PREDICTED: protein FAM186A-like, partial [Salmo salar]
ssa-miR-150-3p	contig_76628	target from/to=[691,711]	-22.20	PREDICTED: phosphoribosylformylglycinamidine synthase isoform X2 [Salmo salar]
ssa-miR-19d-5p	contig_85385	target from/to=[1142,1165]	-22.20	PREDICTED: moesin-like [Salmo salar]
ssa-miR-2188-3p	contig_89451	target from/to=[920,941]	-22.20	PREDICTED: protein Shroom3-like isoform X9 [Salmo salar]
ssa-miR-150-3p	contig_89907	target from/to=[1292,1312]	-22.20	PREDICTED: acidic leucine-rich nuclear phosphoprotein 32 family member B-like isoform X1 [Salmo salar]
ssa-miR-19d-5p	contig_97538	target from/to=[1643,1664]	-22.20	reverse transcriptase-like protein [Salmo salar]
ssa-miR-222b-5p	contig_114303	target from/to=[300,322]	-22.20	PREDICTED: brefeldin A-inhibited guanine nucleotide-exchange protein 2-like [Salmo salar]
ssa-miR-19d-5p	contig_161118	target from/to=[860,883]	-22.20	not available
ssa-miR-19d-5p	contig_1502	target from/to=[659,681]	-22.20	PREDICTED: ceramide synthase 2-like [Salmo salar]
ssa-miR-2188-3p	contig_5064	target from/to=[776,798]	-22.20	PREDICTED: matrix metalloproteinase-15-like [Salmo salar]
ssa-miR-150-3p	contig_7629	target from/to=[2002,2023]	-22.20	Transposable element Tcb1 transposase [Salmo salar]
ssa-miR-19d-5p	contig_13324	target from/to=[75,98]	-22.20	PREDICTED: uncharacterized protein LOC106612744 [Salmo salar]
ssa-miR-23b-5p	contig_13324	target from/to=[1290,1310]	-22.20	PREDICTED: uncharacterized protein LOC106612744 [Salmo salar]
ssa-miR-125b-1-3p	contig_33642	target from/to=[231,249]	-22.20	PREDICTED: dickkopf-related protein 2 [Salmo salar]
ssa-miR-150-3p	contig_53464	target from/to=[302,324]	-22.20	not available
ssa-miR-19d-5p	contig_53602	target from/to=[368,391]	-22.20	PREDICTED: microtubule-associated protein tau-like isoform X4 [Salmo salar]
ssa-miR-150-3p	contig_64877	target from/to=[244,266]	-22.20	PREDICTED: uncharacterized protein LOC106609042 [Salmo salar]
ssa-miR-150-3p	contig_97588	target from/to=[889,911]	-22.20	not available
ssa-miR-150-3p	contig_139413	target from/to=[2838,2856]	-22.20	PREDICTED: SH2 domain-containing adapter protein E [Salmo salar]
ssa-miR-214-5p	contig_13317	target from/to=[1596,1618]	-22.12	PREDICTED: tRNA:m(4)X modification enzyme TRM13 homolog isoform X1 [Salmo salar]
ssa-miR-138-5p	contig_7655	target from/to=[7029,7051]	-22.10	PREDICTED: sterile alpha motif domain-containing protein 9-like [Salmo salar]
ssa-miR-204-5p	contig_8140	target from/to=[951,976]	-22.10	PREDICTED: pantothenate kinase 3-like isoform X1 [Salmo salar]
ssa-miR-133a-3p	contig_8750	target from/to=[2347,2369]	-22.10	PREDICTED: pikachurin-like [Salmo salar]
ssa-miR-193-3p	contig_11238	target from/to=[5414,5437]	-22.10	PREDICTED: synaptotagmin-like protein 2 isoform X5 [Salmo salar]
ssa-miR-138-5p	contig_14534	target from/to=[55,76]	-22.10	PREDICTED: neurobeachin-like [Salmo salar]
ssa-miR-199a-5p	contig_14578	target from/to=[2546,2567]	-22.10	PREDICTED: semaphorin-3F-like isoform X1 [Salmo salar]
ssa-miR-199a-5p	contig_14579	target from/to=[2711,2732]	-22.10	PREDICTED: semaphorin-3F-like isoform X4 [Salmo salar]
ssa-miR-133b-3p	contig_15504	target from/to=[574,594]	-22.10	PREDICTED: progestin and adipoQ receptor family member 9 [Salmo salar]
ssa-miR-199a-3p	contig_18342	target from/to=[1160,1179]	-22.10	Nuclear factor interleukin-3-regulated protein [Salmo salar]
ssa-miR-133a-3p	contig_21113	target from/to=[5779,5800]	-22.10	PREDICTED: E3 ubiquitin-protein ligase CBL isoform X1 [Salmo salar]
ssa-miR-365-5p	contig_22032	target from/to=[375,396]	-22.10	PREDICTED: uncharacterized protein LOC106605384, partial [Salmo salar]
ssa-miR-138-5p	contig_24071	target from/to=[1507,1528]	-22.10	not available
ssa-miR-138-5p	contig_35942	target from/to=[3404,3425]	-22.10	PREDICTED: cysteine-rich motor neuron 1 protein-like [Salmo salar]
ssa-miR-8163-5p	contig_42317	target from/to=[1006,1028]	-22.10	PREDICTED: testicular acid phosphatase homolog [Salmo salar]
ssa-miR-204-5p	contig_43666	target from/to=[1474,1498]	-22.10	not available
ssa-miR-8163-5p	contig_45112	target from/to=[492,514]	-22.10	PREDICTED: potassium voltage-gated channel subfamily KQT member 4-like [Salmo salar]
ssa-miR-193-3p	contig_46399	target from/to=[283,302]	-22.10	PREDICTED: 4,5-dihydroxyphthalate dehydrogenase isoform X1 [Salmo salar]
ssa-miR-214-5p	contig_69319	target from/to=[1853,1872]	-22.10	PREDICTED: uncharacterized aarF domain-containing protein kinase 1 isoform X1 [Salmo salar]
ssa-miR-214-5p	contig_78502	target from/to=[339,361]	-22.10	not available
ssa-miR-204-5p	contig_81465	target from/to=[2748,2768]	-22.10	PREDICTED: uncharacterized protein LOC106597293 [Salmo salar]
ssa-miR-456-5p	contig_85653	target from/to=[1145,1166]	-22.10	PREDICTED: GTP:AMP phosphotransferase AK3, mitochondrial-like isoform X2 [Salmo salar]
ssa-miR-122-5p	contig_85754	target from/to=[1102,1122]	-22.10	PREDICTED: glucagon receptor-like [Salmo salar]
ssa-miR-8163-5p	contig_90213	target from/to=[1945,1969]	-22.10	PREDICTED: alpha-1,3-mannosyl-glycoprotein 4-beta-N-acetylglucosaminyltransferase C-like isoform X2 [Salmo salar]
ssa-miR-122-5p	contig_95436	target from/to=[1513,1534]	-22.10	TNF-alpha-4 isoform [Salmo salar]
ssa-miR-204-5p	contig_102712	target from/to=[1170,1191]	-22.10	PREDICTED: hormone-sensitive lipase-like isoform X1 [Salmo salar]
ssa-miR-365-5p	contig_135091	target from/to=[574,591]	-22.10	not available
ssa-miR-214-5p	contig_2867	target from/to=[1299,1322]	-22.10	Microfibrillar-associated protein 2 precursor [Salmo salar]
ssa-miR-204-5p	contig_5064	target from/to=[833,856]	-22.10	PREDICTED: matrix metalloproteinase-15-like [Salmo salar]
ssa-miR-214-5p	contig_9652	target from/to=[1905,1928]	-22.10	PREDICTED: CB055 protein isoform X3 [Salmo salar]
ssa-miR-122-5p	contig_18495	target from/to=[3620,3640]	-22.10	PREDICTED: tRNA:m(4)X modification enzyme TRM13 homolog isoform X1 [Salmo salar]
ssa-miR-8163-5p	contig_19040	target from/to=[1695,1717]	-22.10	PREDICTED: transmembrane protein 255B-like [Salmo salar]
ssa-miR-133a-3p	contig_21084	target from/to=[4571,4592]	-22.10	PREDICTED: collagen alpha-1(IV) chain-like [Salmo salar]
ssa-miR-19c-3-5p	contig_21084	target from/to=[4712,4734]	-22.10	PREDICTED: collagen alpha-1(IV) chain-like [Salmo salar]
ssa-miR-10a-5p	contig_31076	target from/to=[1000,1022]	-22.10	PREDICTED: EMILIN-3 [Salmo salar]
ssa-miR-138-5p	contig_35187	target from/to=[2894,2916]	-22.10	PREDICTED: A disintegrin and metalloproteinase with thrombospondin motifs 15-like [Salmo salar]
ssa-miR-193-3p	contig_46628	target from/to=[78,100]	-22.10	PREDICTED: olfactory receptor 11A1-like [Salmo salar]
ssa-miR-138-5p	contig_61280	target from/to=[1077,1098]	-22.10	PREDICTED: TGF-beta receptor type-2-like [Salmo salar]
ssa-miR-365-5p	contig_81691	target from/to=[213,232]	-22.10	PREDICTED: tonsoku-like protein [Salmo salar]
ssa-miR-150-3p	contig_75	target from/to=[1465,1486]	-22.10	elongation factor 1 alpha [Salmo salar]
ssa-miR-19d-5p	contig_1545	target from/to=[2078,2099]	-22.10	40S ribosomal protein S2 [Salmo salar]
ssa-miR-150-3p	contig_1693	target from/to=[1279,1300]	-22.10	PREDICTED: uncharacterized protein LOC106600457 [Salmo salar]
ssa-miR-30a-3p	contig_2377	target from/to=[2239,2261]	-22.10	RING1 [Salmo salar]
ssa-miR-19d-5p	contig_7126	target from/to=[879,903]	-22.10	PREDICTED: homocysteine-responsive endoplasmic reticulum-resident ubiquitin-like domain member 2 protein isoform X1 [Salmo salar]
ssa-miR-125b-1-3p	contig_8822	target from/to=[541,559]	-22.10	PREDICTED: ETS homologous factor isoform X2 [Salmo salar]
ssa-miR-194a-5p	contig_9557	target from/to=[2381,2403]	-22.10	PREDICTED: septin-5 isoform X2 [Salmo salar]
ssa-miR-150-3p	contig_10837	target from/to=[2210,2231]	-22.10	PREDICTED: roquin-1-like isoform X1 [Salmo salar]
ssa-miR-19d-5p	contig_11450	target from/to=[26,49]	-22.10	PREDICTED: leucine-rich repeat and calponin homology domain-containing protein 3-like isoform X4 [Salmo salar]
ssa-miR-150-3p	contig_12594	target from/to=[60,79]	-22.10	not available
ssa-miR-92b-3p	contig_14131	target from/to=[71,93]	-22.10	PREDICTED: uncharacterized protein LOC106604999 [Salmo salar]
ssa-miR-19d-5p	contig_15096	target from/to=[7829,7854]	-22.10	PREDICTED: basement membrane-specific heparan sulfate proteoglycan core protein-like isoform X18 [Salmo salar]
ssa-miR-150-3p	contig_15573	target from/to=[2047,2069]	-22.10	PREDICTED: FERM, RhoGEF and pleckstrin domain-containing protein 1-like, partial [Salmo salar]
ssa-miR-150-3p	contig_16227	target from/to=[2723,2747]	-22.10	not available
ssa-miR-19d-5p	contig_16911	target from/to=[2669,2698]	-22.10	Myelin protein zero-like protein 2 precursor [Salmo salar]
ssa-miR-19d-5p	contig_17505	target from/to=[1926,1950]	-22.10	PREDICTED: diacylglycerol O-acyltransferase 1-like [Salmo salar]
ssa-miR-150-3p	contig_20569	target from/to=[2181,2201]	-22.10	PREDICTED: G-protein-signaling modulator 2-like isoform X1 [Salmo salar]
ssa-miR-150-3p	contig_20569	target from/to=[2416,2435]	-22.10	PREDICTED: G-protein-signaling modulator 2-like isoform X1 [Salmo salar]
ssa-miR-19d-5p	contig_21527	target from/to=[2453,2479]	-22.10	PREDICTED: zinc finger protein 281-like, partial [Salmo salar]
ssa-miR-30a-3p	contig_23672	target from/to=[1960,1984]	-22.10	PREDICTED: peptidyl-prolyl cis-trans isomerase A-like isoform X1 [Salmo salar]
ssa-miR-2188-3p	contig_25053	target from/to=[233,254]	-22.10	PREDICTED: tubulin alpha-1C chain isoform X3 [Salmo salar]
ssa-miR-150-3p	contig_25272	target from/to=[336,355]	-22.10	PREDICTED: uncharacterized protein LOC106592539 [Salmo salar]
ssa-miR-150-3p	contig_26805	target from/to=[634,656]	-22.10	PREDICTED: U3 small nucleolar ribonucleoprotein protein IMP4-like isoform X1 [Salmo salar]
ssa-miR-150-3p	contig_27626	target from/to=[1919,1938]	-22.10	PREDICTED: pyrin-like [Salmo salar]
ssa-miR-23b-5p	contig_27652	target from/to=[2333,2354]	-22.10	PREDICTED: ubiquitin carboxyl-terminal hydrolase 26-like isoform X1 [Salmo salar]
[truncated: 63,536 more rows]

## Sheet: head kidney
miRNA	contig	site	delta G	Target description
ssa-miR-150-3p	contig_17573	target from/to=[2470,2492]	-36.00	PREDICTED: transmembrane protein 168-A-like [Salmo salar]
ssa-miR-128-1-5p	contig_70296	target from/to=[1191,1214]	-35.80	PREDICTED: coagulation factor V-like [Salmo salar]
ssa-miR-8162-3p	contig_31699	target from/to=[1679,1700]	-35.10	PREDICTED: glucocorticoid-induced transcript 1 protein-like isoform X1 [Salmo salar]
ssa-miR-150-3p	contig_63213	target from/to=[590,611]	-34.90	PREDICTED: neurotrophin receptor-interacting factor 1-like isoform X1 [Salmo salar]
ssa-miR-150-3p	contig_91657	target from/to=[867,890]	-34.90	PREDICTED: FRAS1-related extracellular matrix protein 2-like, partial [Salmo salar]
ssa-miR-150-3p	contig_21992	target from/to=[1737,1758]	-34.50	PREDICTED: F-BAR domain only protein 2-like isoform X15 [Salmo salar]
ssa-miR-462a-3p	contig_22955	target from/to=[1155,1174]	-34.50	PREDICTED: 3-keto-steroid reductase-like isoform X2 [Salmo salar]
ssa-miR-150-3p	contig_10180	target from/to=[731,753]	-34.30	PREDICTED: uncharacterized protein LOC106604990, partial [Salmo salar]
ssa-miR-150-3p	contig_77611	target from/to=[1223,1246]	-34.00	PREDICTED: fibronectin type III domain-containing protein 5-like isoform X1 [Salmo salar]
ssa-miR-128-1-5p	contig_14156	target from/to=[933,954]	-33.70	transposase [Salmo salar]
ssa-miR-30a-4-3p	contig_94414	target from/to=[2846,2869]	-33.70	PREDICTED: solute carrier family 13 member 5 [Salmo salar]
ssa-miR-150-3p	contig_44117	target from/to=[129,151]	-33.30	Transcription factor 21 [Salmo salar]
ssa-miR-150-3p	contig_17573	target from/to=[2145,2166]	-33.20	PREDICTED: transmembrane protein 168-A-like [Salmo salar]
ssa-miR-214-3p	contig_39880	target from/to=[2300,2320]	-33.20	PREDICTED: UDP-N-acetylglucosamine transporter-like isoform X2 [Salmo salar]
ssa-miR-150-3p	contig_109811	target from/to=[1446,1468]	-32.70	not available
ssa-miR-150-3p	contig_24164	target from/to=[3973,3993]	-32.70	PREDICTED: UPF0317 protein C14orf159 homolog, mitochondrial isoform X2 [Salmo salar]
ssa-miR-128-1-5p	contig_3571	target from/to=[3125,3147]	-32.40	PREDICTED: myotubularin-related protein 3-like isoform X2 [Salmo salar]
ssa-miR-150-3p	contig_8161	target from/to=[2933,2951]	-32.30	PREDICTED: isocitrate dehydrogenase [NAD] subunit beta, mitochondrial-like isoform X1 [Salmo salar]
ssa-miR-150-3p	contig_35746	target from/to=[1921,1942]	-32.20	PREDICTED: neurotrophin receptor-interacting factor 1-like isoform X1 [Salmo salar]
ssa-miR-8157-3p	contig_39045	target from/to=[627,648]	-32.20	PREDICTED: steroid hormone receptor ERR2-like isoform X3 [Salmo salar]
ssa-miR-150-3p	contig_17573	target from/to=[3630,3652]	-32.10	PREDICTED: transmembrane protein 168-A-like [Salmo salar]
ssa-miR-128-1-5p	contig_100508	target from/to=[574,598]	-32.00	PREDICTED: protein FAM217B-like [Salmo salar]
ssa-miR-128-1-5p	contig_71669	target from/to=[761,781]	-32.00	PREDICTED: polypeptide N-acetylgalactosaminyltransferase 11-like [Salmo salar]
ssa-miR-150-3p	contig_31974	target from/to=[62,81]	-31.90	PREDICTED: SPRY domain-containing SOCS box protein 3-like isoform X2 [Salmo salar]
ssa-miR-8157-3p	contig_108426	target from/to=[563,586]	-31.90	PREDICTED: testican-1-like isoform X2 [Salmo salar]
ssa-miR-128-1-5p	contig_2766	target from/to=[3295,3319]	-31.80	PREDICTED: kelch-like protein 20 isoform X1 [Salmo salar]
ssa-miR-128-1-5p	contig_30222	target from/to=[1240,1263]	-31.80	PREDICTED: probable G-protein coupled receptor 141 [Salmo salar]
ssa-miR-8157-3p	contig_3819	target from/to=[646,667]	-31.80	PREDICTED: steroid hormone receptor ERR2-like isoform X3 [Salmo salar]
ssa-miR-8157-3p	contig_21167	target from/to=[2076,2096]	-31.70	PREDICTED: tumor necrosis factor receptor superfamily member 16-like [Salmo salar]
ssa-miR-150-3p	contig_60513	target from/to=[207,232]	-31.60	PREDICTED: LOW QUALITY PROTEIN: N-acetyltransferase 14 [Salmo salar]
ssa-miR-194a-3p	contig_119623	target from/to=[375,399]	-31.60	PREDICTED: PCNA-interacting partner-like [Salmo salar]
ssa-miR-150-3p	contig_22071	target from/to=[273,294]	-31.50	Peroxiredoxin-1 [Salmo salar]
ssa-miR-128-1-5p	contig_14383	target from/to=[1032,1057]	-31.50	not available
ssa-miR-125b-5p	contig_52005	target from/to=[669,690]	-31.50	PREDICTED: uncharacterized protein LOC106572953 isoform X1 [Salmo salar]
ssa-miR-150-3p	contig_18950	target from/to=[1479,1501]	-31.40	PREDICTED: histone-lysine N-methyltransferase SUV39H1-like [Salmo salar]
ssa-miR-8156-5p	contig_49183	target from/to=[78,99]	-31.40	PREDICTED: collagen EMF1-alpha-like [Salmo salar]
ssa-miR-150-3p	contig_10611	target from/to=[3215,3237]	-31.30	PREDICTED: uncharacterized protein LOC106582478 [Salmo salar]
ssa-miR-194b-3p	contig_13685	target from/to=[510,530]	-31.20	PREDICTED: leukocyte elastase inhibitor-like [Salmo salar]
ssa-miR-194a-3p	contig_36191	target from/to=[3122,3144]	-31.20	PREDICTED: mitogen-activated protein kinase kinase kinase MLK4-like isoform X1 [Salmo salar]
ssa-miR-150-3p	contig_57573	target from/to=[1867,1886]	-31.20	PREDICTED: zinc fingers and homeoboxes protein 3-like [Salmo salar]
ssa-miR-125a-5p	contig_52005	target from/to=[669,690]	-31.00	PREDICTED: uncharacterized protein LOC106572953 isoform X1 [Salmo salar]
ssa-miR-150-3p	contig_1818	target from/to=[2574,2597]	-30.90	PREDICTED: arsenite methyltransferase-like [Salmo salar]
ssa-miR-150-3p	contig_41607	target from/to=[2458,2480]	-30.80	PREDICTED: oxidation resistance protein 1-like, partial [Salmo salar]
ssa-miR-150-3p	contig_7889	target from/to=[2636,2659]	-30.70	PREDICTED: clathrin heavy chain 1-like isoform X4 [Salmo salar]
ssa-miR-150-3p	contig_32486	target from/to=[496,516]	-30.70	not available
ssa-miR-92a-5p	contig_84345	target from/to=[895,919]	-30.70	PREDICTED: uncharacterized protein LOC106600457 [Salmo salar]
ssa-miR-150-3p	contig_8730	target from/to=[2020,2042]	-30.60	PREDICTED: nuclear receptor coactivator 4-like isoform X1 [Salmo salar]
ssa-miR-150-3p	contig_23370	target from/to=[1125,1146]	-30.60	PREDICTED: macrophage mannose receptor 1-like [Salmo salar]
ssa-miR-128-1-5p	contig_40254	target from/to=[2180,2204]	-30.40	PREDICTED: afadin- and alpha-actinin-binding protein-like isoform X2 [Salmo salar]
ssa-miR-150-3p	contig_27578	target from/to=[72,94]	-30.30	PREDICTED: transposon Tf2-1 polyprotein [Salmo salar]
ssa-miR-150-3p	contig_3571	target from/to=[3020,3042]	-30.20	PREDICTED: myotubularin-related protein 3-like isoform X2 [Salmo salar]
ssa-miR-92a-5p	contig_44165	target from/to=[895,917]	-30.20	not available
ssa-miR-8157-3p	contig_122554	target from/to=[62,83]	-30.20	PREDICTED: E3 ubiquitin-protein ligase TRIP12-like isoform X1 [Salmo salar]
ssa-miR-30a-4-3p	contig_12071	target from/to=[508,531]	-30.20	PREDICTED: striatin-4 [Salmo salar]
ssa-miR-462a-3p	contig_16078	target from/to=[868,887]	-30.10	PREDICTED: dehydrogenase/reductase SDR family member 7 [Salmo salar]
ssa-miR-150-3p	contig_19780	target from/to=[960,980]	-30.10	PREDICTED: peregrin isoform X1 [Salmo salar]
ssa-miR-30b-5p	contig_10206	target from/to=[1134,1157]	-30.10	PREDICTED: gastrula zinc finger protein XlCGF7.1-like [Salmo salar]
ssa-miR-8156-5p	contig_14969	target from/to=[779,799]	-30.10	Galectin-9 [Salmo salar]
ssa-miR-128-1-5p	contig_54056	target from/to=[1098,1120]	-30.00	PREDICTED: pleckstrin homology domain-containing family H member 1-like [Salmo salar]
ssa-miR-150-3p	contig_28029	target from/to=[415,436]	-29.90	PREDICTED: cytochrome c oxidase subunit 6A1, mitochondrial-like [Salmo salar]
ssa-miR-8157-3p	contig_43592	target from/to=[2044,2065]	-29.90	PREDICTED: dematin isoform X5 [Salmo salar]
ssa-miR-92a-5p	contig_68369	target from/to=[2845,2866]	-29.80	PREDICTED: transcription factor E2F7-like [Salmo salar]
ssa-miR-150-3p	contig_72661	target from/to=[1670,1692]	-29.80	PREDICTED: testis-expressed sequence 11 protein isoform X5 [Salmo salar]
ssa-miR-150-3p	contig_23944	target from/to=[1154,1175]	-29.80	PREDICTED: matrix metalloproteinase-14-like [Salmo salar]
ssa-miR-150-3p	contig_39158	target from/to=[129,150]	-29.70	60S ribosomal protein L36a [Salmo salar]
ssa-miR-200b-5p	contig_36211	target from/to=[1224,1245]	-29.60	PREDICTED: lysine-specific demethylase phf2-like [Salmo salar]
ssa-miR-150-3p	contig_79612	target from/to=[2695,2715]	-29.60	Deoxyribonuclease gamma precursor [Salmo salar]
ssa-miR-128-1-5p	contig_72217	target from/to=[94,117]	-29.60	SPATA5 [Salmo salar]
ssa-miR-128-1-5p	contig_117146	target from/to=[691,714]	-29.50	not available
ssa-miR-214-3p	contig_21752	target from/to=[1924,1948]	-29.50	PREDICTED: BTB/POZ domain-containing adapter for CUL3-mediated RhoA degradation protein 2 isoform X1 [Salmo salar]
ssa-miR-30a-4-3p	contig_25313	target from/to=[2290,2311]	-29.50	PREDICTED: rab9 effector protein with kelch motifs-like [Salmo salar]
ssa-miR-8157-3p	contig_46746	target from/to=[1699,1720]	-29.50	PREDICTED: phospholipid-transporting ATPase 11C-like isoform X1 [Salmo salar]
ssa-miR-19c-3-5p	contig_30184	target from/to=[1865,1888]	-29.40	PREDICTED: uncharacterized protein LOC106577782 [Salmo salar]
ssa-miR-205a-5p	contig_45675	target from/to=[1991,2012]	-29.40	PREDICTED: von Willebrand factor A domain-containing protein 7-like [Salmo salar]
ssa-miR-150-3p	contig_6043	target from/to=[1606,1629]	-29.30	PREDICTED: protein phosphatase 1 regulatory subunit 11-like [Salmo salar]
ssa-miR-128-1-5p	contig_9867	target from/to=[2856,2877]	-29.30	PREDICTED: kinesin-like protein KIF20A [Salmo salar]
ssa-miR-150-3p	contig_41607	target from/to=[1069,1093]	-29.30	PREDICTED: oxidation resistance protein 1-like, partial [Salmo salar]
ssa-miR-150-3p	contig_56153	target from/to=[3026,3050]	-29.30	PREDICTED: sodium- and chloride-dependent GABA transporter ine-like [Salmo salar]
ssa-miR-150-3p	contig_69223	target from/to=[133,155]	-29.30	PREDICTED: zinc finger protein 883-like [Salmo salar]
ssa-miR-150-3p	contig_22955	target from/to=[16,38]	-29.30	PREDICTED: 3-keto-steroid reductase-like isoform X2 [Salmo salar]
ssa-miR-8157-3p	contig_10929	target from/to=[1946,1967]	-29.30	PREDICTED: kynurenine--oxoglutarate transaminase 1-like isoform X3 [Salmo salar]
ssa-miR-150-3p	contig_9046	target from/to=[1641,1664]	-29.20	PREDICTED: clathrin heavy chain 1 isoform X10 [Salmo salar]
ssa-miR-150-3p	contig_10328	target from/to=[1192,1214]	-29.20	Acidic leucine-rich nuclear phosphoprotein 32 family member B [Salmo salar]
ssa-miR-128-1-5p	contig_30457	target from/to=[2076,2097]	-29.20	PREDICTED: carnitine O-acetyltransferase-like [Salmo salar]
ssa-miR-92a-5p	contig_72021	target from/to=[44,65]	-29.20	PREDICTED: galectin-2-like [Salmo salar]
ssa-miR-214-3p	contig_23120	target from/to=[1818,1840]	-29.20	PREDICTED: wee1-like protein kinase 1-A isoform X1 [Salmo salar]
ssa-miR-30a-4-3p	contig_62506	target from/to=[1477,1497]	-29.20	PREDICTED: prominin-1-A-like [Salmo salar]
ssa-miR-128-1-5p	contig_26248	target from/to=[5221,5243]	-29.10	PREDICTED: bcl-2-like protein 13 [Salmo salar]
ssa-miR-150-3p	contig_32718	target from/to=[35,57]	-29.10	PREDICTED: olfactory receptor 11A1-like [Salmo salar]
ssa-miR-150-3p	contig_36637	target from/to=[151,172]	-29.10	PREDICTED: HAUS augmin-like complex subunit 7 [Salmo salar]
ssa-miR-150-3p	contig_44818	target from/to=[1031,1052]	-29.10	Transposable element Tcb1 transposase [Salmo salar]
ssa-miR-196b-5p	contig_59363	target from/to=[444,465]	-29.10	PREDICTED: 40S ribosomal protein S5-like [Salmo salar]
ssa-miR-150-3p	contig_63213	target from/to=[179,198]	-29.10	PREDICTED: neurotrophin receptor-interacting factor 1-like isoform X1 [Salmo salar]
ssa-miR-150-3p	contig_26954	target from/to=[287,310]	-29.00	PREDICTED: extensin-like [Salmo salar]
ssa-miR-138-5p	contig_43570	target from/to=[1056,1078]	-29.00	PREDICTED: calcium-binding protein 39-like [Salmo salar]
ssa-miR-150-3p	contig_55502	target from/to=[998,1020]	-29.00	PREDICTED: paired box protein Pax-5-like, partial [Salmo salar]
ssa-miR-449b-5p	contig_75281	target from/to=[378,398]	-29.00	PREDICTED: required for meiotic nuclear division protein 1 homolog [Salmo salar]
ssa-miR-150-3p	contig_7146	target from/to=[980,1002]	-28.90	Synaptophysin-like protein 1 [Salmo salar]
ssa-miR-214-3p	contig_95191	target from/to=[63,85]	-28.90	PREDICTED: fibrinogen beta chain-like [Salmo salar]
ssa-miR-150-3p	contig_7036	target from/to=[909,928]	-28.80	PREDICTED: sterile alpha motif domain-containing protein 11 isoform X1 [Salmo salar]
ssa-miR-128-1-5p	contig_14866	target from/to=[2586,2611]	-28.80	PREDICTED: sorting nexin-21-like [Salmo salar]
ssa-miR-150-3p	contig_105497	target from/to=[329,352]	-28.80	not available
ssa-miR-150-3p	contig_23370	target from/to=[1477,1496]	-28.70	PREDICTED: macrophage mannose receptor 1-like [Salmo salar]
ssa-miR-150-3p	contig_28665	target from/to=[1942,1963]	-28.70	PREDICTED: kinesin-like protein KIF20B, partial [Salmo salar]
ssa-miR-150-3p	contig_32893	target from/to=[310,329]	-28.70	Transposable element Tcb1 transposase [Salmo salar]
ssa-miR-128-1-5p	contig_8980	target from/to=[2683,2705]	-28.60	PREDICTED: chromosome-associated kinesin KIF4-like [Salmo salar]
ssa-miR-138-5p	contig_30184	target from/to=[1862,1883]	-28.60	PREDICTED: uncharacterized protein LOC106577782 [Salmo salar]
ssa-miR-194b-3p	contig_31238	target from/to=[46,65]	-28.60	vacuolar proton pump subunit D-2, partial [Salmo salar]
ssa-miR-128-1-5p	contig_4789	target from/to=[2190,2210]	-28.60	PREDICTED: calphotin-like isoform X2 [Salmo salar]
ssa-miR-194a-3p	contig_28663	target from/to=[1797,1821]	-28.60	PREDICTED: laminin subunit alpha-4-like isoform X1 [Salmo salar]
ssa-miR-150-3p	contig_16954	target from/to=[160,182]	-28.50	Proteasome subunit alpha type-2 [Salmo salar]
ssa-miR-150-3p	contig_38430	target from/to=[231,255]	-28.50	collagen Type XI Alpha2 [Salmo salar]
ssa-miR-214-3p	contig_50033	target from/to=[1021,1044]	-28.50	UPF0527 membrane protein [Salmo salar]
ssa-miR-150-3p	contig_3298	target from/to=[85,108]	-28.40	PREDICTED: ventricular zone-expressed PH domain-containing protein-like, partial [Salmo salar]
ssa-miR-128-1-5p	contig_16781	target from/to=[1616,1639]	-28.40	PREDICTED: ankyrin repeat and EF-hand domain-containing protein 1-like [Salmo salar]
ssa-miR-8157-3p	contig_47504	target from/to=[476,498]	-28.40	PREDICTED: F-box only protein 30-like [Salmo salar]
ssa-miR-150-3p	contig_4703	target from/to=[2347,2367]	-28.30	PREDICTED: protein FAM45A [Salmo salar]
ssa-miR-128-1-5p	contig_8980	target from/to=[3730,3751]	-28.30	PREDICTED: chromosome-associated kinesin KIF4-like [Salmo salar]
ssa-miR-194a-3p	contig_13685	target from/to=[508,530]	-28.30	PREDICTED: leukocyte elastase inhibitor-like [Salmo salar]
ssa-miR-138-5p	contig_51101	target from/to=[103,128]	-28.30	PREDICTED: uncharacterized protein LOC106604981 isoform X1 [Salmo salar]
ssa-miR-150-3p	contig_73137	target from/to=[1791,1815]	-28.30	not available
ssa-miR-150-3p	contig_65873	target from/to=[1288,1310]	-28.30	PREDICTED: E3 ubiquitin-protein ligase RNF144A-like [Salmo salar]
ssa-miR-150-3p	contig_4680	target from/to=[1132,1152]	-28.20	PREDICTED: hematopoietic progenitor cell antigen CD34-like isoform X1 [Salmo salar]
ssa-miR-150-3p	contig_17573	target from/to=[1308,1330]	-28.20	PREDICTED: transmembrane protein 168-A-like [Salmo salar]
ssa-miR-150-3p	contig_25247	target from/to=[972,993]	-28.20	Ras-related and estrogen-regulated growth inhibitor [Salmo salar]
ssa-miR-150-3p	contig_27578	target from/to=[283,302]	-28.20	PREDICTED: transposon Tf2-1 polyprotein [Salmo salar]
ssa-miR-128-1-5p	contig_30487	target from/to=[1504,1527]	-28.20	PREDICTED: dnaJ homolog subfamily A member 1-like [Salmo salar]
ssa-miR-194a-3p	contig_34897	target from/to=[652,673]	-28.20	PREDICTED: SNARE-associated protein Snapin-like isoform X2 [Salmo salar]
ssa-miR-133a-3p	contig_58688	target from/to=[1877,1898]	-28.20	PREDICTED: rhotekin-like isoform X1 [Salmo salar]
ssa-miR-150-3p	contig_63551	target from/to=[1345,1366]	-28.20	not available
ssa-miR-92a-5p	contig_7036	target from/to=[4304,4326]	-28.10	PREDICTED: sterile alpha motif domain-containing protein 11 isoform X1 [Salmo salar]
ssa-miR-150-3p	contig_72466	target from/to=[350,371]	-28.10	PREDICTED: regulator of G-protein signaling protein-like [Salmo salar]
ssa-miR-92a-5p	contig_14592	target from/to=[60,82]	-28.10	PREDICTED: rap1 GTPase-activating protein 2-like isoform X3 [Salmo salar]
ssa-miR-150-3p	contig_20055	target from/to=[1190,1213]	-28.10	PREDICTED: uncharacterized protein LOC106599900 isoform X1 [Salmo salar]
ssa-miR-150-3p	contig_32078	target from/to=[1083,1103]	-28.10	PREDICTED: phosphatidylserine decarboxylase proenzyme-like isoform X1 [Salmo salar]
ssa-miR-8157-3p	contig_21167	target from/to=[2084,2107]	-28.10	PREDICTED: tumor necrosis factor receptor superfamily member 16-like [Salmo salar]
ssa-miR-30b-3p	contig_710	target from/to=[1656,1677]	-28.00	PREDICTED: probable E3 ubiquitin-protein ligase HERC3 [Salmo salar]
ssa-miR-194b-3p	contig_710	target from/to=[2064,2086]	-28.00	PREDICTED: probable E3 ubiquitin-protein ligase HERC3 [Salmo salar]
ssa-miR-128-1-5p	contig_8832	target from/to=[1826,1847]	-28.00	proteasome subunit beta type 7 [Salmo salar]
ssa-miR-194a-3p	contig_19031	target from/to=[741,763]	-28.00	Surfeit locus protein 1 [Salmo salar]
ssa-miR-150-3p	contig_22651	target from/to=[743,765]	-28.00	PREDICTED: zinc finger protein 536-like [Salmo salar]
ssa-miR-27c-3p	contig_76325	target from/to=[2161,2181]	-28.00	PREDICTED: disheveled-associated activator of morphogenesis 2 isoform X4 [Salmo salar]
ssa-miR-128-1-5p	contig_87424	target from/to=[58,80]	-28.00	PREDICTED: extensin-like, partial [Salmo salar]
ssa-miR-150-3p	contig_33300	target from/to=[2474,2494]	-28.00	PREDICTED: spore wall protein 2-like [Salmo salar]
ssa-miR-128-1-5p	contig_25764	target from/to=[1970,1994]	-27.90	PREDICTED: probable polypeptide N-acetylgalactosaminyltransferase 8 isoform X1 [Salmo salar]
ssa-miR-150-3p	contig_36820	target from/to=[455,475]	-27.90	Transposable element Tcb1 transposase [Salmo salar]
ssa-miR-150-3p	contig_61217	target from/to=[89,112]	-27.90	PREDICTED: acyl carrier protein, mitochondrial-like [Salmo salar]
ssa-miR-194a-3p	contig_88656	target from/to=[44,66]	-27.90	PREDICTED: glutenin, high molecular weight subunit DY10-like isoform X1 [Salmo salar]
ssa-miR-150-3p	contig_42658	target from/to=[1723,1748]	-27.90	PREDICTED: hormone-sensitive lipase-like [Salmo salar]
ssa-miR-142b-3p	contig_9896	target from/to=[81,105]	-27.90	Transposable element Tcb2 transposase [Salmo salar]
ssa-miR-133a-3p	contig_20421	target from/to=[910,932]	-27.80	PREDICTED: ell-associated factor Eaf-like [Salmo salar]
ssa-miR-194a-3p	contig_21752	target from/to=[2094,2119]	-27.80	PREDICTED: BTB/POZ domain-containing adapter for CUL3-mediated RhoA degradation protein 2 isoform X1 [Salmo salar]
ssa-miR-150-3p	contig_26255	target from/to=[1748,1770]	-27.80	PREDICTED: COP9 signalosome complex subunit 8 isoform X1 [Salmo salar]
ssa-miR-150-3p	contig_49379	target from/to=[63,86]	-27.80	COL11A2, partial [Salmo salar]
ssa-miR-150-3p	contig_101564	target from/to=[982,1007]	-27.80	PREDICTED: uncharacterized protein LOC106600701 isoform X1 [Salmo salar]
ssa-miR-150-3p	contig_34897	target from/to=[663,686]	-27.80	PREDICTED: SNARE-associated protein Snapin-like isoform X2 [Salmo salar]
ssa-miR-150-3p	contig_42658	target from/to=[1708,1730]	-27.80	PREDICTED: hormone-sensitive lipase-like [Salmo salar]
ssa-miR-150-3p	contig_7768	target from/to=[3872,3894]	-27.70	PREDICTED: asparagine synthetase [glutamine-hydrolyzing]-like [Salmo salar]
ssa-miR-128-1-5p	contig_9867	target from/to=[2223,2242]	-27.70	PREDICTED: kinesin-like protein KIF20A [Salmo salar]
ssa-miR-150-3p	contig_28665	target from/to=[1365,1385]	-27.70	PREDICTED: kinesin-like protein KIF20B, partial [Salmo salar]
ssa-miR-192b-5p	contig_31191	target from/to=[1830,1851]	-27.70	PREDICTED: tectonic-2 [Salmo salar]
ssa-miR-128-1-5p	contig_105563	target from/to=[490,512]	-27.70	PREDICTED: gamma-crystallin M2-like [Salmo salar]
ssa-miR-15a-5p	contig_123619	target from/to=[368,390]	-27.70	Myelin protein zero-like protein 2 precursor [Salmo salar]
ssa-miR-23a-4-5p	contig_31654	target from/to=[2653,2675]	-27.60	PREDICTED: uncharacterized protein LOC106591608 isoform X3 [Salmo salar]
ssa-miR-128-1-5p	contig_32508	target from/to=[1588,1610]	-27.60	PREDICTED: aryl hydrocarbon receptor-like, partial [Salmo salar]
ssa-miR-150-3p	contig_78543	target from/to=[67,87]	-27.60	PREDICTED: sorting nexin-5-like [Salmo salar]
ssa-miR-150-3p	contig_86306	target from/to=[141,162]	-27.60	PREDICTED: hemopexin-like [Salmo salar]
ssa-miR-214-3p	contig_26393	target from/to=[266,288]	-27.60	UMP-CMP kinase 2, mitochondrial [Salmo salar]
ssa-miR-30a-4-3p	contig_58047	target from/to=[582,605]	-27.60	PREDICTED: kelch-like protein 4 isoform X1 [Salmo salar]
ssa-miR-92a-5p	contig_11929	target from/to=[775,797]	-27.50	PREDICTED: mannose-P-dolichol utilization defect 1 protein-like [Salmo salar]
ssa-miR-128-1-5p	contig_14582	target from/to=[2107,2128]	-27.50	PREDICTED: tetratricopeptide repeat protein 27 isoform X1 [Salmo salar]
ssa-miR-462a-3p	contig_14686	target from/to=[3317,3337]	-27.50	PREDICTED: cationic amino acid transporter 3-like [Salmo salar]
ssa-miR-194b-3p	contig_24830	target from/to=[452,475]	-27.50	PREDICTED: RING finger protein 135 isoform X2 [Salmo salar]
ssa-miR-150-3p	contig_37425	target from/to=[225,247]	-27.50	PREDICTED: WD repeat-containing protein 82-like isoform X1 [Salmo salar]
ssa-miR-150-3p	contig_47761	target from/to=[499,520]	-27.50	PREDICTED: RING finger protein 24-like isoform X1 [Salmo salar]
ssa-miR-150-3p	contig_84967	target from/to=[123,143]	-27.50	not available
ssa-miR-128-1-5p	contig_91085	target from/to=[1644,1664]	-27.50	PREDICTED: suppressor APC domain-containing protein 2-like isoform X1 [Salmo salar]
ssa-miR-8157-3p	contig_15699	target from/to=[732,754]	-27.50	not available
ssa-miR-8157-3p	contig_27814	target from/to=[33,53]	-27.50	not available
ssa-miR-8157-3p	contig_27814	target from/to=[47,67]	-27.50	not available
ssa-miR-8157-3p	contig_117146	target from/to=[1637,1659]	-27.50	not available
ssa-miR-8157-3p	contig_49870	target from/to=[577,599]	-27.50	PREDICTED: apoptosis-inducing factor 3-like isoform X1 [Salmo salar]
ssa-miR-150-3p	contig_29309	target from/to=[3476,3499]	-27.40	PREDICTED: peripheral-type benzodiazepine receptor-associated protein 1-like isoform X9 [Salmo salar]
ssa-miR-150-3p	contig_39522	target from/to=[702,723]	-27.40	PREDICTED: cytoplasmic dynein 1 heavy chain 1 isoform X1 [Salmo salar]
ssa-miR-92a-5p	contig_66637	target from/to=[3054,3078]	-27.40	PREDICTED: mannosyl-oligosaccharide 1,2-alpha-mannosidase IA-like [Salmo salar]
ssa-miR-194a-3p	contig_20055	target from/to=[1144,1168]	-27.40	PREDICTED: uncharacterized protein LOC106599900 isoform X1 [Salmo salar]
ssa-miR-128-1-5p	contig_61038	target from/to=[26,48]	-27.40	Galectin-9 [Salmo salar]
ssa-miR-125b-5p	contig_13282	target from/to=[1580,1601]	-27.40	PREDICTED: condensin complex subunit 2-like [Salmo salar]
ssa-miR-8157-3p	contig_18921	target from/to=[1935,1958]	-27.40	PREDICTED: F-box only protein 25 isoform X1 [Salmo salar]
ssa-miR-214-3p	contig_21942	target from/to=[134,155]	-27.40	PREDICTED: protein ARV1 [Salmo salar]
ssa-miR-30a-4-3p	contig_75692	target from/to=[342,365]	-27.40	not available
ssa-miR-150-3p	contig_6809	target from/to=[2374,2395]	-27.30	Ubiquitin-conjugating enzyme E2 D2 [Salmo salar]
ssa-miR-150-3p	contig_34836	target from/to=[593,614]	-27.30	PREDICTED: ventricular zone-expressed PH domain-containing protein-like, partial [Salmo salar]
ssa-miR-150-3p	contig_41244	target from/to=[1088,1108]	-27.30	UPF0527 membrane protein [Salmo salar]
ssa-miR-150-3p	contig_5940	target from/to=[94,118]	-27.30	PREDICTED: extensin-like [Salmo salar]
ssa-miR-150-3p	contig_52570	target from/to=[982,1003]	-27.30	PREDICTED: indoleamine 2,3-dioxygenase 2-like [Salmo salar]
ssa-miR-30a-4-3p	contig_57124	target from/to=[2124,2145]	-27.30	PREDICTED: semaphorin-6B-like isoform X3 [Salmo salar]
ssa-miR-455-5p	contig_91711	target from/to=[1499,1520]	-27.30	PREDICTED: PDZ domain-containing protein GIPC3-like isoform X1 [Salmo salar]
ssa-miR-194a-3p	contig_32404	target from/to=[428,450]	-27.20	Arrestin domain-containing protein 3 [Salmo salar]
ssa-miR-150-3p	contig_60804	target from/to=[182,203]	-27.20	PREDICTED: immunoglobulin-like domain-containing receptor 2 [Salmo salar]
ssa-miR-150-3p	contig_66518	target from/to=[837,858]	-27.20	PREDICTED: glucocorticoid modulatory element-binding protein 1 isoform X3 [Salmo salar]
ssa-miR-92a-5p	contig_81685	target from/to=[614,639]	-27.20	Deoxycytidine kinase [Salmo salar]
ssa-miR-8157-3p	contig_6363	target from/to=[889,910]	-27.20	Transposable element Tcb1 transposase [Salmo salar]
ssa-miR-205a-5p	contig_44988	target from/to=[94,116]	-27.20	PREDICTED: signal-induced proliferation-associated protein 1-like isoform X1 [Salmo salar]
ssa-miR-8156-5p	contig_49183	target from/to=[25,45]	-27.20	PREDICTED: collagen EMF1-alpha-like [Salmo salar]
ssa-miR-8156-5p	contig_49183	target from/to=[43,63]	-27.20	PREDICTED: collagen EMF1-alpha-like [Salmo salar]
ssa-miR-8156-5p	contig_49183	target from/to=[70,90]	-27.20	PREDICTED: collagen EMF1-alpha-like [Salmo salar]
ssa-miR-459-5p	contig_21116	target from/to=[3881,3903]	-27.10	PREDICTED: rabankyrin-5 isoform X2 [Salmo salar]
ssa-miR-150-3p	contig_100338	target from/to=[915,937]	-27.10	PREDICTED: UDP-N-acetylglucosamine transporter-like isoform X1 [Salmo salar]
ssa-miR-194a-3p	contig_28523	target from/to=[453,476]	-27.10	Neutral and basic amino acid transport protein rBAT [Salmo salar]
ssa-miR-150-3p	contig_91555	target from/to=[559,581]	-27.10	PREDICTED: solute carrier organic anion transporter family member 4A1-like isoform X1 [Salmo salar]
ssa-miR-30a-4-3p	contig_4510	target from/to=[1048,1069]	-27.10	28 kDa heat- and acid-stable phosphoprotein [Salmo salar]
ssa-miR-8157-3p	contig_30520	target from/to=[512,535]	-27.10	PREDICTED: uncharacterized protein LOC106607322 [Salmo salar]
ssa-miR-20b-5p	contig_44165	target from/to=[662,683]	-27.10	not available
ssa-miR-8156-5p	contig_101077	target from/to=[1038,1057]	-27.10	PREDICTED: unconventional myosin-Va-like isoform X2 [Salmo salar]
ssa-miR-8157-3p	contig_42658	target from/to=[1246,1266]	-27.10	PREDICTED: hormone-sensitive lipase-like [Salmo salar]
ssa-miR-200b-5p	contig_4184	target from/to=[275,296]	-27.00	Transposable element Tcb1 transposase [Salmo salar]
ssa-miR-128-1-5p	contig_8264	target from/to=[1414,1437]	-27.00	PREDICTED: breast cancer type 1 susceptibility protein isoform X1 [Salmo salar]
ssa-miR-200b-5p	contig_12822	target from/to=[163,184]	-27.00	Transposable element Tcb1 transposase [Salmo salar]
ssa-miR-128-1-5p	contig_29749	target from/to=[1095,1119]	-27.00	PREDICTED: serine/threonine-protein kinase Nek2-like [Salmo salar]
ssa-miR-128-1-5p	contig_33765	target from/to=[1021,1043]	-27.00	PREDICTED: sodium/potassium/calcium exchanger 4-like isoform X2 [Salmo salar]
ssa-miR-200b-5p	contig_34007	target from/to=[431,452]	-27.00	SPATA5 [Salmo salar]
ssa-miR-133a-3p	contig_52414	target from/to=[32,52]	-27.00	reverse transcriptase-like protein [Salmo salar]
ssa-miR-150-3p	contig_53007	target from/to=[3993,4013]	-27.00	PREDICTED: nuclear receptor ROR-beta-like [Salmo salar]
ssa-miR-200b-5p	contig_6836	target from/to=[791,812]	-27.00	SPATA5 [Salmo salar]
ssa-miR-150-3p	contig_32046	target from/to=[65,86]	-27.00	PREDICTED: uncharacterized protein LOC106592948 isoform X1 [Salmo salar]
ssa-miR-133a-3p	contig_48933	target from/to=[2353,2374]	-27.00	PREDICTED: angiomotin-like 2a [Salmo salar]
ssa-miR-150-3p	contig_91555	target from/to=[548,569]	-27.00	PREDICTED: solute carrier organic anion transporter family member 4A1-like isoform X1 [Salmo salar]
ssa-miR-150-3p	contig_112994	target from/to=[1910,1930]	-27.00	Very long-chain acyl-CoA synthetase [Salmo salar]
ssa-miR-30a-4-3p	contig_3789	target from/to=[3100,3121]	-27.00	PREDICTED: interferon regulatory factor 3 isoform X2 [Salmo salar]
ssa-miR-30b-5p	contig_76934	target from/to=[819,844]	-27.00	PREDICTED: putative protein TPRXL [Salmo salar]
ssa-miR-194b-3p	contig_194	target from/to=[2088,2110]	-26.90	PREDICTED: protein MMS22-like isoform X1 [Salmo salar]
ssa-miR-194a-3p	contig_6424	target from/to=[1621,1645]	-26.90	PREDICTED: cytosolic 5'-nucleotidase 1A-like [Salmo salar]
ssa-miR-150-3p	contig_7883	target from/to=[285,308]	-26.90	voltage-dependent anion channel 2-3 [Salmo salar]
ssa-miR-128-1-5p	contig_37225	target from/to=[1216,1239]	-26.90	PREDICTED: cholesterol 24-hydroxylase-like isoform X1 [Salmo salar]
ssa-miR-150-3p	contig_24818	target from/to=[102,124]	-26.90	PREDICTED: chemokine-like receptor 1 [Salmo salar]
ssa-miR-214-3p	contig_21942	target from/to=[532,554]	-26.90	PREDICTED: protein ARV1 [Salmo salar]
ssa-miR-8157-3p	contig_13942	target from/to=[3341,3364]	-26.90	PREDICTED: lysyl oxidase homolog 2A-like [Salmo salar]
ssa-miR-30a-4-3p	contig_32078	target from/to=[1058,1082]	-26.90	PREDICTED: phosphatidylserine decarboxylase proenzyme-like isoform X1 [Salmo salar]
ssa-miR-150-3p	contig_6809	target from/to=[775,796]	-26.80	Ubiquitin-conjugating enzyme E2 D2 [Salmo salar]
ssa-miR-192b-5p	contig_9280	target from/to=[995,1016]	-26.80	Lysozyme g [Salmo salar]
ssa-miR-150-3p	contig_15764	target from/to=[248,269]	-26.80	PREDICTED: transposon Tf2-1 polyprotein [Salmo salar]
ssa-miR-459-3p	contig_24192	target from/to=[2044,2066]	-26.80	PREDICTED: lamina-associated polypeptide 2, isoform beta-like isoform X8 [Salmo salar]
ssa-miR-150-3p	contig_44782	target from/to=[1207,1229]	-26.80	PREDICTED: snRNA-activating protein complex subunit 1-like [Salmo salar]
ssa-miR-150-3p	contig_68859	target from/to=[393,414]	-26.80	not available
ssa-miR-150-3p	contig_76881	target from/to=[1023,1041]	-26.80	PREDICTED: mitochondrial intermembrane space import and assembly protein 40-A-like [Salmo salar]
ssa-miR-449b-5p	contig_79373	target from/to=[536,556]	-26.80	PREDICTED: CREB-regulated transcription coactivator 2-like isoform X2 [Salmo salar]
ssa-miR-30a-4-3p	contig_16190	target from/to=[420,441]	-26.80	Centrosomal protein of 27 kDa [Salmo salar]
ssa-miR-30a-4-3p	contig_30490	target from/to=[1516,1536]	-26.80	PREDICTED: potential DNA-binding protein C17orf49 homolog isoform X3 [Salmo salar]
ssa-miR-150-3p	contig_2659	target from/to=[912,931]	-26.70	PREDICTED: calpastatin 2 isoform X12 [Salmo salar]
ssa-miR-150-3p	contig_18523	target from/to=[4127,4147]	-26.70	PREDICTED: dedicator of cytokinesis protein 5-like isoform X1 [Salmo salar]
ssa-miR-150-3p	contig_32893	target from/to=[1652,1673]	-26.70	Transposable element Tcb1 transposase [Salmo salar]
ssa-miR-150-3p	contig_33328	target from/to=[361,382]	-26.70	Transposable element Tcb1 transposase [Salmo salar]
ssa-miR-128-1-5p	contig_42130	target from/to=[210,233]	-26.70	Netrin-G1 ligand precursor [Salmo salar]
ssa-miR-196a-5p	contig_59363	target from/to=[444,465]	-26.70	PREDICTED: 40S ribosomal protein S5-like [Salmo salar]
ssa-miR-194b-3p	contig_60372	target from/to=[2242,2264]	-26.70	not available
ssa-miR-150-3p	contig_116852	target from/to=[153,173]	-26.70	PREDICTED: adhesive plaque matrix protein-like isoform X1 [Salmo salar]
ssa-miR-150-3p	contig_116852	target from/to=[265,285]	-26.70	PREDICTED: adhesive plaque matrix protein-like isoform X1 [Salmo salar]
ssa-miR-150-3p	contig_116852	target from/to=[295,315]	-26.70	PREDICTED: adhesive plaque matrix protein-like isoform X1 [Salmo salar]
ssa-miR-150-3p	contig_116852	target from/to=[426,446]	-26.70	PREDICTED: adhesive plaque matrix protein-like isoform X1 [Salmo salar]
ssa-miR-128-1-5p	contig_12957	target from/to=[3829,3848]	-26.70	PREDICTED: laminin subunit gamma-3-like [Salmo salar]
ssa-miR-150-3p	contig_14778	target from/to=[798,820]	-26.70	PREDICTED: protein cordon-bleu-like isoform X2 [Salmo salar]
ssa-miR-150-3p	contig_70133	target from/to=[3006,3028]	-26.70	PREDICTED: G-protein-signaling modulator 2 isoform X2 [Salmo salar]
ssa-miR-8157-3p	contig_50787	target from/to=[980,1001]	-26.70	not available
ssa-miR-138-5p	contig_3715	target from/to=[268,291]	-26.60	PREDICTED: coiled-coil domain-containing protein 97-like, partial [Salmo salar]
ssa-miR-150-3p	contig_5690	target from/to=[1974,1996]	-26.60	PREDICTED: condensin complex subunit 1 isoform X2 [Salmo salar]
ssa-miR-150-3p	contig_13387	target from/to=[3087,3107]	-26.60	PREDICTED: nuclear receptor-binding protein 2-like [Salmo salar]
ssa-miR-150-3p	contig_15812	target from/to=[1056,1077]	-26.60	C20orf54 homolog precursor [Salmo salar]
ssa-miR-128-1-5p	contig_26605	target from/to=[3407,3431]	-26.60	PREDICTED: protein FAM78A isoform X1 [Salmo salar]
ssa-miR-128-1-5p	contig_37208	target from/to=[1730,1752]	-26.60	PREDICTED: regulator of cytokinesis 1 isoform X1 [Salmo salar]
ssa-miR-150-3p	contig_40521	target from/to=[2112,2132]	-26.60	PREDICTED: zinc finger protein 227-like [Salmo salar]
ssa-miR-150-3p	contig_71439	target from/to=[1030,1049]	-26.60	PREDICTED: UDP-N-acetylglucosamine transporter-like isoform X3 [Salmo salar]
ssa-miR-128-1-5p	contig_76548	target from/to=[1356,1377]	-26.60	PREDICTED: CAAX prenyl protease 2-like [Salmo salar]
ssa-miR-128-1-5p	contig_77989	target from/to=[62,83]	-26.60	PREDICTED: sialoadhesin-like isoform X3 [Salmo salar]
ssa-miR-194b-3p	contig_39378	target from/to=[677,698]	-26.60	PREDICTED: hyaluronan mediated motility receptor-like isoform X2 [Salmo salar]
ssa-miR-150-3p	contig_40026	target from/to=[3948,3969]	-26.60	PREDICTED: SH3 domain and tetratricopeptide repeat-containing protein 1-like [Salmo salar]
ssa-miR-150-3p	contig_70126	target from/to=[964,985]	-26.60	not available
ssa-miR-92a-5p	contig_91085	target from/to=[1640,1662]	-26.60	PREDICTED: suppressor APC domain-containing protein 2-like isoform X1 [Salmo salar]
ssa-miR-128-1-5p	contig_91555	target from/to=[549,574]	-26.60	PREDICTED: solute carrier organic anion transporter family member 4A1-like isoform X1 [Salmo salar]
ssa-miR-150-5p	contig_6815	target from/to=[158,177]	-26.60	PREDICTED: tubulointerstitial nephritis antigen-like [Salmo salar]
ssa-miR-30a-4-3p	contig_45997	target from/to=[605,626]	-26.60	PREDICTED: transcription factor IIIB 50 kDa subunit [Salmo salar]
ssa-miR-92a-5p	contig_4680	target from/to=[1155,1178]	-26.50	PREDICTED: hematopoietic progenitor cell antigen CD34-like isoform X1 [Salmo salar]
ssa-miR-150-3p	contig_13881	target from/to=[2104,2123]	-26.50	PREDICTED: ras-related protein Rab-18-like [Salmo salar]
ssa-miR-150-3p	contig_17367	target from/to=[271,291]	-26.50	Transposable element Tcb1 transposase [Salmo salar]
ssa-miR-150-3p	contig_18092	target from/to=[22,44]	-26.50	PREDICTED: zinc finger protein 358-like [Salmo salar]
ssa-miR-150-3p	contig_20991	target from/to=[47,69]	-26.50	PREDICTED: F-box only protein 48 [Salmo salar]
ssa-miR-150-3p	contig_31146	target from/to=[344,365]	-26.50	not available
ssa-miR-150-3p	contig_68569	target from/to=[1659,1681]	-26.50	Charged multivesicular body protein 3 [Salmo salar]
ssa-miR-150-3p	contig_76548	target from/to=[993,1014]	-26.50	PREDICTED: CAAX prenyl protease 2-like [Salmo salar]
ssa-miR-192b-5p	contig_77961	target from/to=[1232,1252]	-26.50	PREDICTED: aurora kinase A and ninein-interacting protein isoform X1 [Salmo salar]
ssa-miR-128-1-5p	contig_81511	target from/to=[139,162]	-26.50	PREDICTED: uncharacterized protein LOC106576489 [Salmo salar]
ssa-miR-138-5p	contig_41168	target from/to=[1603,1625]	-26.50	PREDICTED: UDP-glucuronosyltransferase-like [Salmo salar]
ssa-miR-8157-3p	contig_5690	target from/to=[1297,1316]	-26.50	PREDICTED: condensin complex subunit 1 isoform X2 [Salmo salar]
ssa-miR-30a-4-3p	contig_26954	target from/to=[276,297]	-26.50	PREDICTED: extensin-like [Salmo salar]
ssa-miR-8157-3p	contig_56563	target from/to=[45,66]	-26.50	Deoxyribonuclease gamma precursor [Salmo salar]
ssa-miR-8157-3p	contig_66620	target from/to=[823,846]	-26.50	PREDICTED: formin-like protein 5 isoform X2 [Salmo salar]
ssa-miR-30a-4-3p	contig_23974	target from/to=[4003,4024]	-26.50	PREDICTED: large neutral amino acids transporter small subunit 3-like [Salmo salar]
ssa-miR-214-3p	contig_33300	target from/to=[3445,3471]	-26.50	PREDICTED: spore wall protein 2-like [Salmo salar]
ssa-miR-30a-4-3p	contig_74297	target from/to=[1033,1054]	-26.50	PREDICTED: protocadherin Fat 1-like isoform X5 [Salmo salar]
ssa-miR-192a-3p	contig_6923	target from/to=[1847,1867]	-26.40	PREDICTED: protein FAM83D-like [Salmo salar]
ssa-miR-194a-3p	contig_8477	target from/to=[2914,2937]	-26.40	GTP-binding protein era homolog [Salmo salar]
ssa-miR-150-3p	contig_11958	target from/to=[4679,4700]	-26.40	PREDICTED: vacuolar fusion protein MON1 homolog B-like [Salmo salar]
ssa-miR-150-3p	contig_12679	target from/to=[2532,2554]	-26.40	PREDICTED: bromodomain-containing protein 3-like isoform X7 [Salmo salar]
ssa-miR-150-3p	contig_41736	target from/to=[1066,1088]	-26.40	PREDICTED: intermediate conductance calcium-activated potassium channel protein 4-like [Salmo salar]
ssa-miR-459-3p	contig_47569	target from/to=[224,246]	-26.40	PREDICTED: RCC1 and BTB domain-containing protein 1-like isoform X2 [Salmo salar]
ssa-miR-150-3p	contig_120093	target from/to=[302,321]	-26.40	PREDICTED: cadherin EGF LAG seven-pass G-type receptor 1-like [Salmo salar]
ssa-miR-150-3p	contig_29666	target from/to=[332,353]	-26.40	PREDICTED: uncharacterized protein LOC106609985 [Salmo salar]
ssa-miR-128-1-5p	contig_44699	target from/to=[663,684]	-26.40	PREDICTED: protein crumbs homolog 3-like [Salmo salar]
ssa-miR-194b-3p	contig_112994	target from/to=[768,792]	-26.40	Very long-chain acyl-CoA synthetase [Salmo salar]
ssa-miR-462b-3p	contig_1779	target from/to=[91,111]	-26.40	PREDICTED: protein FAM83D-like isoform X1 [Salmo salar]
ssa-miR-214-3p	contig_41055	target from/to=[3369,3392]	-26.40	PREDICTED: GTP:AMP phosphotransferase AK3, mitochondrial-like isoform X2 [Salmo salar]
ssa-miR-30a-4-3p	contig_60372	target from/to=[1325,1348]	-26.40	not available
ssa-miR-8157-3p	contig_139824	target from/to=[1160,1183]	-26.40	PREDICTED: lactosylceramide alpha-2,3-sialyltransferase-like, partial [Salmo salar]
ssa-miR-194b-3p	contig_809	target from/to=[2022,2044]	-26.30	Transposable element Tcb1 transposase [Salmo salar]
ssa-miR-150-3p	contig_7768	target from/to=[4320,4342]	-26.30	PREDICTED: asparagine synthetase [glutamine-hydrolyzing]-like [Salmo salar]
ssa-miR-138-5p	contig_8237	target from/to=[5020,5042]	-26.30	PREDICTED: N-acyl-aromatic-L-amino acid amidohydrolase (carboxylate-forming) B-like [Salmo salar]
ssa-miR-128-1-5p	contig_19780	target from/to=[401,425]	-26.30	PREDICTED: peregrin isoform X1 [Salmo salar]
ssa-miR-150-3p	contig_22125	target from/to=[2030,2050]	-26.30	PREDICTED: DNA polymerase kappa-like [Salmo salar]
ssa-miR-192b-5p	contig_22577	target from/to=[1448,1467]	-26.30	Interferon-related developmental regulator 2 [Salmo salar]
ssa-miR-150-3p	contig_27947	target from/to=[223,241]	-26.30	PREDICTED: wee1-like protein kinase 1-B isoform X2 [Salmo salar]
ssa-miR-128-1-5p	contig_36513	target from/to=[897,919]	-26.30	PREDICTED: glucagon receptor-like [Salmo salar]
ssa-miR-194a-3p	contig_37177	target from/to=[1515,1535]	-26.30	PREDICTED: vacuolar protein sorting-associated protein 37B-like [Salmo salar]
ssa-miR-194b-3p	contig_10439	target from/to=[2890,2915]	-26.30	PREDICTED: protein NLRC3-like [Salmo salar]
ssa-miR-150-3p	contig_73168	target from/to=[282,301]	-26.30	Barrier-to-autointegration factor [Salmo salar]
ssa-miR-30a-4-3p	contig_10894	target from/to=[878,902]	-26.30	PREDICTED: coiled-coil domain-containing protein 61-like isoform X2 [Salmo salar]
ssa-miR-8157-3p	contig_11283	target from/to=[6096,6117]	-26.30	PREDICTED: two pore calcium channel protein 1 isoform X2 [Salmo salar]
ssa-miR-30a-4-3p	contig_38404	target from/to=[1312,1333]	-26.30	PREDICTED: moesin-like [Salmo salar]
ssa-miR-8157-3p	contig_41209	target from/to=[1649,1669]	-26.30	PREDICTED: nuclear factor 7, brain-like [Salmo salar]
ssa-miR-150-3p	contig_4990	target from/to=[1844,1867]	-26.20	PREDICTED: kinesin-like protein KIF2C isoform X1 [Salmo salar]
ssa-miR-128-1-5p	contig_47840	target from/to=[10,36]	-26.20	PREDICTED: uncharacterized protein LOC106605384, partial [Salmo salar]
ssa-miR-150-3p	contig_8290	target from/to=[311,334]	-26.20	PREDICTED: solute carrier family 25 member 34-like [Salmo salar]
ssa-miR-128-1-5p	contig_13942	target from/to=[1467,1487]	-26.20	PREDICTED: lysyl oxidase homolog 2A-like [Salmo salar]
ssa-miR-128-1-5p	contig_38296	target from/to=[41,59]	-26.20	PREDICTED: junctional adhesion molecule A-like [Salmo salar]
ssa-miR-23a-4-5p	contig_71669	target from/to=[34,57]	-26.20	PREDICTED: polypeptide N-acetylgalactosaminyltransferase 11-like [Salmo salar]
ssa-miR-128-1-5p	contig_129369	target from/to=[988,1007]	-26.20	PREDICTED: sodium/glucose cotransporter 4 [Salmo salar]
ssa-miR-132-3p	contig_31968	target from/to=[1311,1333]	-26.20	CD226 antigen precursor [Salmo salar]
ssa-miR-8157-3p	contig_40878	target from/to=[2247,2268]	-26.20	PREDICTED: phospholipid-transporting ATPase IG-like isoform X2 [Salmo salar]
ssa-miR-30a-4-3p	contig_109861	target from/to=[634,654]	-26.20	PREDICTED: neurofibromin isoform X5 [Salmo salar]
ssa-miR-8157-3p	contig_52224	target from/to=[406,425]	-26.20	not available
ssa-miR-214-3p	contig_62083	target from/to=[570,592]	-26.20	PREDICTED: CCR4-NOT transcription complex subunit 4-like, partial [Salmo salar]
ssa-miR-150-3p	contig_3670	target from/to=[659,679]	-26.10	PREDICTED: serine incorporator 2-like isoform X1 [Salmo salar]
ssa-miR-128-1-5p	contig_5801	target from/to=[1484,1505]	-26.10	Cysteine desulfurase, mitochondrial precursor [Salmo salar]
ssa-miR-150-3p	contig_12760	target from/to=[767,786]	-26.10	PREDICTED: vacuolar protein sorting-associated protein 52 homolog [Salmo salar]
ssa-miR-128-1-5p	contig_13282	target from/to=[1523,1548]	-26.10	PREDICTED: condensin complex subunit 2-like [Salmo salar]
ssa-miR-128-1-5p	contig_13911	target from/to=[3143,3164]	-26.10	PREDICTED: vacuolar protein sorting-associated protein 37B-like [Salmo salar]
ssa-miR-150-3p	contig_18921	target from/to=[863,883]	-26.10	PREDICTED: F-box only protein 25 isoform X1 [Salmo salar]
ssa-miR-150-3p	contig_29039	target from/to=[759,780]	-26.10	not available
ssa-miR-194b-3p	contig_33596	target from/to=[1594,1616]	-26.10	transposase [Salmo salar]
ssa-miR-92a-5p	contig_52082	target from/to=[1563,1585]	-26.10	THAP domain-containing protein 7 [Salmo salar]
ssa-miR-150-3p	contig_76881	target from/to=[608,629]	-26.10	PREDICTED: mitochondrial intermembrane space import and assembly protein 40-A-like [Salmo salar]
ssa-miR-150-3p	contig_8577	target from/to=[571,593]	-26.10	PREDICTED: vesicle transport protein GOT1B [Salmo salar]
ssa-miR-128-1-5p	contig_13930	target from/to=[1138,1158]	-26.10	PREDICTED: Na(+)/H(+) exchange regulatory cofactor NHE-RF3-like [Salmo salar]
ssa-miR-128-1-5p	contig_21167	target from/to=[1264,1285]	-26.10	PREDICTED: tumor necrosis factor receptor superfamily member 16-like [Salmo salar]
ssa-miR-30a-4-3p	contig_40919	target from/to=[1794,1816]	-26.10	PREDICTED: protein regulator of cytokinesis 1-like isoform X1 [Salmo salar]
ssa-miR-150-3p	contig_1406	target from/to=[435,456]	-26.00	P2X purinoceptor 4 [Salmo salar]
ssa-miR-150-3p	contig_2064	target from/to=[1116,1137]	-26.00	Transposable element Tcb1 transposase [Salmo salar]
ssa-miR-16b-3p	contig_17804	target from/to=[1064,1086]	-26.00	RCC2 homolog [Salmo salar]
ssa-miR-128-1-5p	contig_23917	target from/to=[494,515]	-26.00	Transmembrane protein 86A [Salmo salar]
ssa-miR-194b-3p	contig_26804	target from/to=[1054,1076]	-26.00	PREDICTED: uncharacterized protein LOC106597293 [Salmo salar]
ssa-miR-128-1-5p	contig_26973	target from/to=[1164,1187]	-26.00	not available
ssa-miR-150-3p	contig_27538	target from/to=[3175,3198]	-26.00	PREDICTED: brain-specific angiogenesis inhibitor 1-associated protein 2-like isoform X2 [Salmo salar]
ssa-miR-133a-3p	contig_29309	target from/to=[3766,3787]	-26.00	PREDICTED: peripheral-type benzodiazepine receptor-associated protein 1-like isoform X9 [Salmo salar]
ssa-miR-150-3p	contig_30318	target from/to=[758,779]	-26.00	PREDICTED: cat eye syndrome critical region protein 5-like [Salmo salar]
ssa-miR-449b-5p	contig_56376	target from/to=[335,353]	-26.00	PREDICTED: E3 ubiquitin-protein ligase SMURF2-like [Salmo salar]
ssa-miR-92a-5p	contig_57618	target from/to=[693,715]	-26.00	PREDICTED: crystallin J1A isoform X1 [Salmo salar]
ssa-miR-150-3p	contig_75696	target from/to=[920,942]	-26.00	PREDICTED: endophilin-B1 [Salmo salar]
ssa-miR-128-1-5p	contig_108426	target from/to=[525,547]	-26.00	PREDICTED: testican-1-like isoform X2 [Salmo salar]
ssa-miR-150-3p	contig_91555	target from/to=[995,1013]	-26.00	PREDICTED: solute carrier organic anion transporter family member 4A1-like isoform X1 [Salmo salar]
ssa-miR-125b-5p	contig_10307	target from/to=[1877,1899]	-26.00	PREDICTED: dnaJ homolog subfamily B member 5-like isoform X1 [Salmo salar]
ssa-miR-205a-5p	contig_19026	target from/to=[213,233]	-26.00	Uridine phosphorylase 1 [Salmo salar]
ssa-miR-8157-3p	contig_20919	target from/to=[792,811]	-26.00	PREDICTED: zinc finger protein 585A-like [Salmo salar]
ssa-miR-30a-4-3p	contig_32008	target from/to=[6614,6635]	-26.00	PREDICTED: uncharacterized protein LOC106595063 [Salmo salar]
ssa-miR-8157-3p	contig_36303	target from/to=[262,284]	-26.00	not available
ssa-miR-30a-4-3p	contig_44699	target from/to=[673,694]	-26.00	PREDICTED: protein crumbs homolog 3-like [Salmo salar]
ssa-miR-150-3p	contig_7036	target from/to=[1143,1164]	-25.90	PREDICTED: sterile alpha motif domain-containing protein 11 isoform X1 [Salmo salar]
ssa-miR-150-3p	contig_12413	target from/to=[1649,1669]	-25.90	PREDICTED: serine/threonine-protein kinase Chk1 [Salmo salar]
ssa-miR-150-3p	contig_31664	target from/to=[983,1005]	-25.90	interleukin-1 beta [Salmo salar]
ssa-miR-128-1-5p	contig_32936	target from/to=[2546,2568]	-25.90	PREDICTED: ATP-binding cassette sub-family G member 2 isoform X1 [Salmo salar]
ssa-miR-150-3p	contig_43509	target from/to=[1534,1554]	-25.90	PREDICTED: synapse differentiation-inducing gene protein 1 [Salmo salar]
ssa-miR-128-1-5p	contig_60372	target from/to=[2091,2113]	-25.90	not available
ssa-miR-15a-5p	contig_66798	target from/to=[1321,1343]	-25.90	not available
ssa-miR-196a-5p	contig_90916	target from/to=[649,670]	-25.90	transposase [Salmo salar]
ssa-miR-92a-5p	contig_43601	target from/to=[809,831]	-25.90	PREDICTED: purine nucleoside phosphorylase-like [Salmo salar]
ssa-miR-8157-3p	contig_194	target from/to=[471,491]	-25.90	PREDICTED: protein MMS22-like isoform X1 [Salmo salar]
ssa-miR-30a-4-3p	contig_14315	target from/to=[737,759]	-25.90	PREDICTED: uncharacterized protein LOC106597293 [Salmo salar]
ssa-miR-30b-5p	contig_25788	target from/to=[217,240]	-25.90	PREDICTED: N-lysine methyltransferase SETD8 [Salmo salar]
ssa-miR-128-1-5p	contig_5726	target from/to=[2503,2526]	-25.80	PREDICTED: kinesin-like protein KIF11-B [Salmo salar]
ssa-miR-150-3p	contig_8264	target from/to=[1073,1092]	-25.80	PREDICTED: breast cancer type 1 susceptibility protein isoform X1 [Salmo salar]
ssa-miR-194b-3p	contig_17514	target from/to=[1217,1236]	-25.80	PREDICTED: uncharacterized protein LOC106609046 isoform X4 [Salmo salar]
ssa-miR-150-3p	contig_19947	target from/to=[580,602]	-25.80	PREDICTED: actin-binding protein anillin-like isoform X6 [Salmo salar]
ssa-miR-92a-5p	contig_21116	target from/to=[4585,4605]	-25.80	PREDICTED: rabankyrin-5 isoform X2 [Salmo salar]
ssa-miR-150-3p	contig_22577	target from/to=[1600,1624]	-25.80	Interferon-related developmental regulator 2 [Salmo salar]
ssa-miR-194b-3p	contig_29167	target from/to=[82,103]	-25.80	PREDICTED: deoxyuridine 5'-triphosphate nucleotidohydrolase, mitochondrial isoform X1 [Salmo salar]
ssa-miR-92a-5p	contig_43954	target from/to=[404,429]	-25.80	PREDICTED: proteasome subunit alpha type-6-like [Salmo salar]
ssa-miR-150-3p	contig_45033	target from/to=[864,887]	-25.80	PREDICTED: uncharacterized protein DDB_G0290685-like [Salmo salar]
ssa-miR-138-5p	contig_69306	target from/to=[1093,1114]	-25.80	PREDICTED: nuclear GTPase SLIP-GC-like isoform X2 [Salmo salar]
ssa-miR-194b-3p	contig_73296	target from/to=[597,618]	-25.80	not available
ssa-miR-128-1-5p	contig_86306	target from/to=[1,25]	-25.80	PREDICTED: hemopexin-like [Salmo salar]
ssa-miR-128-1-5p	contig_4077	target from/to=[1346,1369]	-25.80	PREDICTED: G-protein coupled receptor 84 [Salmo salar]
ssa-miR-128-1-5p	contig_12957	target from/to=[4578,4601]	-25.80	PREDICTED: laminin subunit gamma-3-like [Salmo salar]
ssa-miR-128-1-5p	contig_18864	target from/to=[2560,2582]	-25.80	PREDICTED: solute carrier family 41 member 1-like [Salmo salar]
ssa-miR-23a-4-5p	contig_62664	target from/to=[1543,1565]	-25.80	PREDICTED: protein amnionless-like [Salmo salar]
ssa-miR-150-3p	contig_63283	target from/to=[2977,2999]	-25.80	PREDICTED: ETS translocation variant 5-like isoform X5 [Salmo salar]
ssa-miR-30b-3p	contig_66613	target from/to=[14,37]	-25.80	PREDICTED: uncharacterized protein LOC106600457 [Salmo salar]
ssa-miR-727-3p	contig_32851	target from/to=[923,943]	-25.80	PREDICTED: YTH domain-containing family protein 1-like isoform X3 [Salmo salar]
ssa-miR-125b-5p	contig_36191	target from/to=[3627,3648]	-25.80	PREDICTED: mitogen-activated protein kinase kinase kinase MLK4-like isoform X1 [Salmo salar]
ssa-miR-30a-4-3p	contig_39892	target from/to=[736,755]	-25.80	PREDICTED: tyrosine-protein phosphatase non-receptor type 3-like [Salmo salar]
ssa-miR-33a-5p	contig_46702	target from/to=[1267,1289]	-25.80	PREDICTED: GTPase-activating protein and VPS9 domain-containing protein 1-like isoform X6 [Salmo salar]
ssa-miR-8156-5p	contig_53687	target from/to=[378,400]	-25.80	PREDICTED: uncharacterized protein LOC106586956 [Salmo salar]
ssa-miR-8156-5p	contig_53687	target from/to=[440,462]	-25.80	PREDICTED: uncharacterized protein LOC106586956 [Salmo salar]
ssa-miR-30a-4-3p	contig_74089	target from/to=[82,102]	-25.80	PREDICTED: ER degradation-enhancing alpha-mannosidase-like protein 3 isoform X5 [Salmo salar]
ssa-miR-30a-4-3p	contig_117669	target from/to=[646,670]	-25.80	PREDICTED: tryptophan 5-hydroxylase 2-like [Salmo salar]
ssa-miR-150-3p	contig_10302	target from/to=[1595,1619]	-25.70	PREDICTED: protein Jumonji-like [Salmo salar]
ssa-miR-192b-5p	contig_11283	target from/to=[6195,6216]	-25.70	PREDICTED: two pore calcium channel protein 1 isoform X2 [Salmo salar]
ssa-miR-194b-3p	contig_21510	target from/to=[1804,1826]	-25.70	PREDICTED: ATP-binding cassette sub-family G member 2 isoform X1 [Salmo salar]
ssa-miR-150-3p	contig_36191	target from/to=[2937,2956]	-25.70	PREDICTED: mitogen-activated protein kinase kinase kinase MLK4-like isoform X1 [Salmo salar]
ssa-miR-138-5p	contig_37631	target from/to=[516,538]	-25.70	PREDICTED: uncharacterized protein LOC106591102 [Salmo salar]
ssa-miR-150-3p	contig_39522	target from/to=[61,84]	-25.70	PREDICTED: cytoplasmic dynein 1 heavy chain 1 isoform X1 [Salmo salar]
ssa-miR-150-3p	contig_53678	target from/to=[400,423]	-25.70	High mobility group-T protein [Salmo salar]
ssa-miR-133a-3p	contig_56153	target from/to=[2893,2914]	-25.70	PREDICTED: sodium- and chloride-dependent GABA transporter ine-like [Salmo salar]
ssa-miR-133a-3p	contig_59446	target from/to=[1856,1876]	-25.70	not available
ssa-miR-150-3p	contig_75323	target from/to=[1229,1251]	-25.70	PREDICTED: uncharacterized protein LOC106603467 [Salmo salar]
ssa-miR-138-5p	contig_77343	target from/to=[808,827]	-25.70	PREDICTED: alpha-2A adrenergic receptor-like [Salmo salar]
ssa-miR-192a-3p	contig_1762	target from/to=[2311,2332]	-25.70	PREDICTED: prostaglandin reductase 1-like isoform X1 [Salmo salar]
ssa-miR-30a-4-3p	contig_11304	target from/to=[35,56]	-25.70	PREDICTED: mitochondria-eating protein [Salmo salar]
ssa-miR-18b-5p	contig_44243	target from/to=[538,561]	-25.70	PREDICTED: ATP-dependent Clp protease ATP-binding subunit clpX-like, mitochondrial isoform X2 [Salmo salar]
ssa-miR-8157-3p	contig_74831	target from/to=[759,781]	-25.70	PREDICTED: uncharacterized protein LOC106603329 [Salmo salar]
ssa-miR-8157-3p	contig_75023	target from/to=[617,638]	-25.70	PREDICTED: poly [ADP-ribose] polymerase 6 isoform X1 [Salmo salar]
ssa-miR-8157-3p	contig_9675	target from/to=[368,390]	-25.70	Synuclein [Salmo salar]
ssa-miR-150-3p	contig_215	target from/to=[1752,1775]	-25.60	PREDICTED: centromere protein I-like isoform X1 [Salmo salar]
ssa-miR-128-1-5p	contig_5726	target from/to=[2010,2032]	-25.60	PREDICTED: kinesin-like protein KIF11-B [Salmo salar]
ssa-miR-128-1-5p	contig_12413	target from/to=[1707,1729]	-25.60	PREDICTED: serine/threonine-protein kinase Chk1 [Salmo salar]
ssa-miR-459-3p	contig_14969	target from/to=[2435,2455]	-25.60	Galectin-9 [Salmo salar]
ssa-miR-92a-5p	contig_17367	target from/to=[263,284]	-25.60	Transposable element Tcb1 transposase [Salmo salar]
ssa-miR-150-3p	contig_20906	target from/to=[808,828]	-25.60	PREDICTED: keratin-associated protein 21-1-like [Salmo salar]
ssa-miR-194b-3p	contig_24926	target from/to=[1041,1066]	-25.60	PREDICTED: neurotrophin receptor-interacting factor 1-like isoform X1 [Salmo salar]
ssa-miR-92a-5p	contig_29309	target from/to=[3393,3416]	-25.60	PREDICTED: peripheral-type benzodiazepine receptor-associated protein 1-like isoform X9 [Salmo salar]
ssa-miR-194b-3p	contig_29309	target from/to=[3943,3966]	-25.60	PREDICTED: peripheral-type benzodiazepine receptor-associated protein 1-like isoform X9 [Salmo salar]
ssa-miR-128-1-5p	contig_30425	target from/to=[96,118]	-25.60	PREDICTED: RAD51-associated protein 1-like isoform X1 [Salmo salar]
ssa-miR-194b-3p	contig_30457	target from/to=[2075,2096]	-25.60	PREDICTED: carnitine O-acetyltransferase-like [Salmo salar]
ssa-miR-194b-3p	contig_30457	target from/to=[2503,2523]	-25.60	PREDICTED: carnitine O-acetyltransferase-like [Salmo salar]
ssa-miR-150-3p	contig_33459	target from/to=[98,122]	-25.60	PREDICTED: beta-1,3-glucosyltransferase-like isoform X3 [Salmo salar]
ssa-miR-128-1-5p	contig_49379	target from/to=[1997,2017]	-25.60	COL11A2, partial [Salmo salar]
ssa-miR-128-1-5p	contig_59003	target from/to=[162,185]	-25.60	PREDICTED: TNF receptor-associated factor 2-like [Salmo salar]
ssa-miR-128-1-5p	contig_76770	target from/to=[1339,1361]	-25.60	PREDICTED: tudor domain-containing protein 1 isoform X6 [Salmo salar]
ssa-miR-150-3p	contig_89619	target from/to=[1166,1190]	-25.60	not available
ssa-miR-150-3p	contig_91218	target from/to=[849,869]	-25.60	not available
ssa-miR-194b-3p	contig_110397	target from/to=[482,499]	-25.60	PREDICTED: zinc finger protein 638-like isoform X5 [Salmo salar]
ssa-miR-150-3p	contig_13942	target from/to=[2183,2206]	-25.60	PREDICTED: lysyl oxidase homolog 2A-like [Salmo salar]
ssa-miR-150-3p	contig_18864	target from/to=[1630,1652]	-25.60	PREDICTED: solute carrier family 41 member 1-like [Salmo salar]
ssa-miR-128-1-5p	contig_26065	target from/to=[848,870]	-25.60	PREDICTED: N-acetylmuramoyl-L-alanine amidase-like [Salmo salar]
ssa-miR-133a-3p	contig_81185	target from/to=[517,541]	-25.60	PREDICTED: disabled homolog 2-like isoform X2 [Salmo salar]
ssa-miR-8157-3p	contig_30	target from/to=[507,528]	-25.60	Transposable element Tcb1 transposase [Salmo salar]
ssa-miR-30a-4-3p	contig_15482	target from/to=[701,722]	-25.60	PREDICTED: nuclear factor erythroid 2-related factor 1-like [Salmo salar]
ssa-miR-202-5p	contig_17865	target from/to=[1115,1134]	-25.60	PREDICTED: phenylethanolamine N-methyltransferase [Salmo salar]
ssa-miR-19c-3-5p	contig_25655	target from/to=[419,442]	-25.60	Transposable element Tcb1 transposase [Salmo salar]
ssa-miR-727-3p	contig_37778	target from/to=[227,247]	-25.60	PREDICTED: NACHT, LRR and PYD domains-containing protein 12-like isoform X1 [Salmo salar]
ssa-miR-8157-3p	contig_66637	target from/to=[3131,3152]	-25.60	PREDICTED: mannosyl-oligosaccharide 1,2-alpha-mannosidase IA-like [Salmo salar]
ssa-miR-19c-3-5p	contig_21167	target from/to=[1828,1851]	-25.60	PREDICTED: tumor necrosis factor receptor superfamily member 16-like [Salmo salar]
ssa-miR-30a-4-3p	contig_99298	target from/to=[19,40]	-25.60	PREDICTED: glutathione S-transferase Mu 3-like [Salmo salar]
ssa-miR-150-3p	contig_745	target from/to=[61,85]	-25.50	Rhombotin-1 [Salmo salar]
ssa-miR-150-3p	contig_1608	target from/to=[2075,2096]	-25.50	Eukaryotic translation initiation factor 5 [Salmo salar]
ssa-miR-92a-5p	contig_2766	target from/to=[3294,3317]	-25.50	PREDICTED: kelch-like protein 20 isoform X1 [Salmo salar]
ssa-miR-128-1-5p	contig_20564	target from/to=[1108,1130]	-25.50	PREDICTED: THAP domain-containing protein 11-like [Salmo salar]
ssa-miR-150-3p	contig_22188	target from/to=[1993,2013]	-25.50	PREDICTED: grpE protein homolog 2, mitochondrial-like isoform X1 [Salmo salar]
ssa-miR-138-5p	contig_23476	target from/to=[151,175]	-25.50	not available
ssa-miR-30b-3p	contig_25655	target from/to=[138,161]	-25.50	Transposable element Tcb1 transposase [Salmo salar]
ssa-miR-138-5p	contig_25764	target from/to=[1623,1646]	-25.50	PREDICTED: probable polypeptide N-acetylgalactosaminyltransferase 8 isoform X1 [Salmo salar]
ssa-miR-194b-3p	contig_27826	target from/to=[1199,1220]	-25.50	PREDICTED: MAGUK p55 subfamily member 5-A-like [Salmo salar]
ssa-miR-150-3p	contig_29396	target from/to=[2121,2141]	-25.50	PREDICTED: glucose-induced degradation protein 4 homolog, partial [Salmo salar]
ssa-miR-150-3p	contig_33741	target from/to=[2242,2265]	-25.50	PREDICTED: E3 ubiquitin-protein ligase RNF34 isoform X3 [Salmo salar]
ssa-miR-15a-5p	contig_35138	target from/to=[167,188]	-25.50	not available
ssa-miR-150-3p	contig_57274	target from/to=[7,28]	-25.50	not available
ssa-miR-150-3p	contig_75620	target from/to=[1342,1364]	-25.50	not available
ssa-miR-150-3p	contig_84345	target from/to=[2045,2065]	-25.50	PREDICTED: uncharacterized protein LOC106600457 [Salmo salar]
ssa-miR-150-3p	contig_21226	target from/to=[691,711]	-25.50	NDRG1 [Salmo salar]
ssa-miR-150-3p	contig_26823	target from/to=[1090,1111]	-25.50	PREDICTED: cytosolic phospholipase A2 gamma-like isoform X2 [Salmo salar]
ssa-miR-135b-5p	contig_68015	target from/to=[191,213]	-25.50	PREDICTED: hydroxyacid-oxoacid transhydrogenase, mitochondrial isoform X2 [Salmo salar]
ssa-miR-128-1-5p	contig_81185	target from/to=[476,498]	-25.50	PREDICTED: disabled homolog 2-like isoform X2 [Salmo salar]
ssa-miR-8157-3p	contig_4802	target from/to=[1613,1638]	-25.50	NEDD8 ultimate buster 1 [Salmo salar]
ssa-miR-122-5p	contig_26509	target from/to=[2004,2025]	-25.50	PREDICTED: acyl-coenzyme A oxidase-like protein [Salmo salar]
ssa-miR-199a-3p	contig_29782	target from/to=[345,365]	-25.50	C12orf65 homolog [Salmo salar]
ssa-miR-205a-5p	contig_37831	target from/to=[75,96]	-25.50	FGF2 [Salmo salar]
ssa-miR-8157-3p	contig_51411	target from/to=[434,458]	-25.50	PREDICTED: ras-related protein Rab-4A isoform X1 [Salmo salar]
ssa-miR-30a-4-3p	contig_84345	target from/to=[1582,1604]	-25.50	PREDICTED: uncharacterized protein LOC106600457 [Salmo salar]
ssa-miR-551-3p	contig_107796	target from/to=[662,683]	-25.50	PREDICTED: complement factor I [Salmo salar]
ssa-miR-15a-5p	contig_3500	target from/to=[1230,1252]	-25.40	PREDICTED: deoxynucleoside triphosphate triphosphohydrolase SAMHD1 isoform X1 [Salmo salar]
ssa-miR-128-1-5p	contig_7768	target from/to=[3646,3667]	-25.40	PREDICTED: asparagine synthetase [glutamine-hydrolyzing]-like [Salmo salar]
ssa-miR-128-1-5p	contig_10302	target from/to=[1871,1893]	-25.40	PREDICTED: protein Jumonji-like [Salmo salar]
ssa-miR-462a-3p	contig_10529	target from/to=[68,88]	-25.40	not available
ssa-miR-106b-3p	contig_13994	target from/to=[11,36]	-25.40	PREDICTED: steroid hormone receptor ERR2-like isoform X3 [Salmo salar]
ssa-miR-150-3p	contig_18523	target from/to=[2557,2579]	-25.40	PREDICTED: dedicator of cytokinesis protein 5-like isoform X1 [Salmo salar]
ssa-miR-133a-3p	contig_19557	target from/to=[1004,1028]	-25.40	PREDICTED: mitochondrial dicarboxylate carrier-like [Salmo salar]
ssa-miR-150-3p	contig_23120	target from/to=[361,383]	-25.40	PREDICTED: wee1-like protein kinase 1-A isoform X1 [Salmo salar]
ssa-miR-133a-3p	contig_24040	target from/to=[125,147]	-25.40	PREDICTED: nectin-4-like [Salmo salar]
ssa-miR-128-1-5p	contig_36875	target from/to=[1853,1879]	-25.40	PREDICTED: toll-like receptor 7 [Salmo salar]
ssa-miR-150-3p	contig_8290	target from/to=[1764,1786]	-25.40	PREDICTED: solute carrier family 25 member 34-like [Salmo salar]
ssa-miR-150-3p	contig_20138	target from/to=[995,1013]	-25.40	PREDICTED: dimethylaniline monooxygenase [N-oxide-forming] 5-like [Salmo salar]
ssa-miR-128-1-5p	contig_54473	target from/to=[284,306]	-25.40	sodium/glucose cotransporter 1 [Salmo salar]
ssa-miR-128-1-5p	contig_164657	target from/to=[253,280]	-25.40	PREDICTED: glucagon receptor-like [Salmo salar]
ssa-miR-30a-4-3p	contig_1454	target from/to=[1713,1735]	-25.40	PREDICTED: ral guanine nucleotide dissociation stimulator-like 1 isoform X1 [Salmo salar]
ssa-miR-8157-3p	contig_22577	target from/to=[1244,1264]	-25.40	Interferon-related developmental regulator 2 [Salmo salar]
ssa-miR-8157-3p	contig_27814	target from/to=[26,46]	-25.40	not available
ssa-miR-8157-3p	contig_27814	target from/to=[54,74]	-25.40	not available
ssa-miR-202-5p	contig_31699	target from/to=[1424,1445]	-25.40	PREDICTED: glucocorticoid-induced transcript 1 protein-like isoform X1 [Salmo salar]
ssa-miR-202-5p	contig_41244	target from/to=[1804,1826]	-25.40	UPF0527 membrane protein [Salmo salar]
ssa-miR-18a-5p	contig_44243	target from/to=[538,561]	-25.40	PREDICTED: ATP-dependent Clp protease ATP-binding subunit clpX-like, mitochondrial isoform X2 [Salmo salar]
ssa-miR-214-3p	contig_75196	target from/to=[1159,1184]	-25.40	not available
ssa-miR-122-5p	contig_75713	target from/to=[2188,2208]	-25.40	Kunitz-type protease inhibitor 1 precursor [Salmo salar]
ssa-miR-192b-5p	contig_2347	target from/to=[1157,1177]	-25.30	PREDICTED: AN1-type zinc finger protein 3-like isoform X2 [Salmo salar]
ssa-miR-150-3p	contig_5721	target from/to=[3278,3297]	-25.30	PREDICTED: uncharacterized protein LOC106600457 [Salmo salar]
ssa-miR-150-3p	contig_9045	target from/to=[2396,2416]	-25.30	Transposable element Tcb1 transposase [Salmo salar]
ssa-miR-150-3p	contig_14686	target from/to=[4417,4441]	-25.30	PREDICTED: cationic amino acid transporter 3-like [Salmo salar]
ssa-miR-128-1-5p	contig_23370	target from/to=[671,693]	-25.30	PREDICTED: macrophage mannose receptor 1-like [Salmo salar]
ssa-miR-128-1-5p	contig_25683	target from/to=[346,369]	-25.30	PREDICTED: dematin isoform X3 [Salmo salar]
ssa-miR-20a-1-3p	contig_32824	target from/to=[133,157]	-25.30	PREDICTED: uncharacterized protein LOC106613328 isoform X3 [Salmo salar]
ssa-miR-138-5p	contig_38815	target from/to=[30,54]	-25.30	not available
ssa-miR-15a-5p	contig_45675	target from/to=[184,206]	-25.30	PREDICTED: von Willebrand factor A domain-containing protein 7-like [Salmo salar]
ssa-miR-128-1-5p	contig_50352	target from/to=[676,698]	-25.30	hypothetical protein, partial [Salmo salar]
ssa-miR-138-5p	contig_33300	target from/to=[3183,3206]	-25.30	PREDICTED: spore wall protein 2-like [Salmo salar]
ssa-miR-462a-3p	contig_70641	target from/to=[904,926]	-25.30	PREDICTED: apoptosis-inducing factor 3-like isoform X1 [Salmo salar]
ssa-miR-150-3p	contig_74297	target from/to=[2601,2619]	-25.30	PREDICTED: protocadherin Fat 1-like isoform X5 [Salmo salar]
ssa-miR-128-1-5p	contig_79771	target from/to=[284,304]	-25.30	PREDICTED: cap-specific mRNA (nucleoside-2'-O-)-methyltransferase 2 isoform X1 [Salmo salar]
ssa-miR-181a-3-3p	contig_8476	target from/to=[616,633]	-25.30	PREDICTED: intersectin-2-like, partial [Salmo salar]
ssa-miR-18b-5p	contig_10929	target from/to=[2317,2339]	-25.30	PREDICTED: kynurenine--oxoglutarate transaminase 1-like isoform X3 [Salmo salar]
ssa-miR-181a-3-3p	contig_37177	target from/to=[357,376]	-25.30	PREDICTED: vacuolar protein sorting-associated protein 37B-like [Salmo salar]
ssa-miR-462b-3p	contig_53817	target from/to=[1,18]	-25.30	Deoxyribonuclease gamma precursor [Salmo salar]
ssa-miR-8156-5p	contig_78428	target from/to=[75,95]	-25.30	PREDICTED: CJ072 protein isoform X2 [Salmo salar]
ssa-miR-214-3p	contig_84345	target from/to=[2450,2472]	-25.30	PREDICTED: uncharacterized protein LOC106600457 [Salmo salar]
ssa-miR-30a-4-3p	contig_145589	target from/to=[1033,1053]	-25.30	PREDICTED: deleted in malignant brain tumors 1 protein-like isoform X2 [Salmo salar]
ssa-miR-20b-5p	contig_670	target from/to=[860,880]	-25.30	PREDICTED: gamma-glutamyltranspeptidase 1-like [Salmo salar]
ssa-miR-205a-5p	contig_13808	target from/to=[754,773]	-25.30	PREDICTED: solute carrier family 25 member 36-A-like [Salmo salar]
ssa-miR-214-3p	contig_17127	target from/to=[1983,2005]	-25.30	PREDICTED: uncharacterized protein LOC106609103 isoform X4 [Salmo salar]
ssa-miR-92a-5p	contig_4922	target from/to=[567,589]	-25.20	not available
ssa-miR-128-1-5p	contig_7380	target from/to=[411,435]	-25.20	ribosomal protein S26 [Salmo salar]
ssa-miR-138-5p	contig_12246	target from/to=[1627,1647]	-25.20	PREDICTED: ribonuclease-like 3, partial [Salmo salar]
ssa-miR-150-3p	contig_15764	target from/to=[96,115]	-25.20	PREDICTED: transposon Tf2-1 polyprotein [Salmo salar]
ssa-miR-192a-3p	contig_22981	target from/to=[17,42]	-25.20	PREDICTED: uncharacterized protein LOC106605384, partial [Salmo salar]
ssa-miR-128-1-5p	contig_24830	target from/to=[322,347]	-25.20	PREDICTED: RING finger protein 135 isoform X2 [Salmo salar]
ssa-miR-212a-5p	contig_27618	target from/to=[1035,1058]	-25.20	General transcription factor II-I repeat domain-containing protein 2B, partial [Salmo salar]
ssa-miR-150-3p	contig_43080	target from/to=[3891,3910]	-25.20	PREDICTED: cysteine/serine-rich nuclear protein 3-like isoform X1 [Salmo salar]
ssa-miR-128-1-5p	contig_47668	target from/to=[531,552]	-25.20	Probable E3 ubiquitin-protein ligase RNF144A-A [Salmo salar]
ssa-miR-194b-3p	contig_53971	target from/to=[493,514]	-25.20	PREDICTED: uncharacterized protein K02A2.6-like [Salmo salar]
ssa-miR-459-3p	contig_140166	target from/to=[565,585]	-25.20	PREDICTED: tripartite motif-containing protein 16-like [Salmo salar]
ssa-miR-192a-3p	contig_43601	target from/to=[802,822]	-25.20	PREDICTED: purine nucleoside phosphorylase-like [Salmo salar]
ssa-miR-150-3p	contig_48655	target from/to=[2103,2122]	-25.20	Formimidoyltransferase-cyclodeaminase [Salmo salar]
ssa-miR-128-1-5p	contig_64502	target from/to=[1949,1972]	-25.20	PREDICTED: double-stranded RNA-specific editase B2 [Salmo salar]
ssa-miR-128-1-5p	contig_104530	target from/to=[2138,2162]	-25.20	PREDICTED: rootletin-like isoform X1 [Salmo salar]
ssa-miR-30a-4-3p	contig_745	target from/to=[1201,1222]	-25.20	Rhombotin-1 [Salmo salar]
ssa-miR-128-3p	contig_5726	target from/to=[3327,3348]	-25.20	PREDICTED: kinesin-like protein KIF11-B [Salmo salar]
ssa-miR-125a-5p	contig_10307	target from/to=[1877,1899]	-25.20	PREDICTED: dnaJ homolog subfamily B member 5-like isoform X1 [Salmo salar]
ssa-let-7a-5p	contig_32838	target from/to=[1359,1380]	-25.20	PREDICTED: putative nuclease HARBI1 [Salmo salar]
ssa-miR-8157-3p	contig_54639	target from/to=[964,985]	-25.20	PREDICTED: uncharacterized protein LOC106611750 isoform X2 [Salmo salar]
ssa-miR-125b-5p	contig_82315	target from/to=[248,269]	-25.20	PREDICTED: protein CBFA2T2 isoform X1 [Salmo salar]
ssa-miR-455-5p	contig_11966	target from/to=[679,700]	-25.20	not available
ssa-miR-30a-4-3p	contig_42658	target from/to=[2774,2795]	-25.20	PREDICTED: hormone-sensitive lipase-like [Salmo salar]
ssa-miR-8157-3p	contig_52145	target from/to=[544,565]	-25.20	PREDICTED: 40S ribosomal protein SA-like [Salmo salar]
ssa-miR-8157-3p	contig_101210	target from/to=[647,668]	-25.20	PREDICTED: epidermal growth factor receptor-like isoform X3 [Salmo salar]
ssa-miR-462a-3p	contig_3789	target from/to=[3319,3338]	-25.10	PREDICTED: interferon regulatory factor 3 isoform X2 [Salmo salar]
ssa-miR-150-3p	contig_5809	target from/to=[1590,1616]	-25.10	PREDICTED: cAMP-dependent protein kinase catalytic subunit beta isoform X3 [Salmo salar]
ssa-miR-150-3p	contig_7220	target from/to=[2676,2697]	-25.10	PREDICTED: kinesin-like protein KIF20A isoform X1 [Salmo salar]
ssa-miR-150-3p	contig_12263	target from/to=[293,317]	-25.10	PREDICTED: mitotic checkpoint serine/threonine-protein kinase BUB1 beta-like [Salmo salar]
ssa-miR-92a-5p	contig_13089	target from/to=[2249,2270]	-25.10	PREDICTED: metal-response element-binding transcription factor 2-like isoform X1 [Salmo salar]
ssa-miR-15a-5p	contig_21752	target from/to=[2230,2253]	-25.10	PREDICTED: BTB/POZ domain-containing adapter for CUL3-mediated RhoA degradation protein 2 isoform X1 [Salmo salar]
ssa-miR-92a-5p	contig_25313	target from/to=[2116,2138]	-25.10	PREDICTED: rab9 effector protein with kelch motifs-like [Salmo salar]
ssa-miR-92a-5p	contig_26248	target from/to=[1783,1807]	-25.10	PREDICTED: bcl-2-like protein 13 [Salmo salar]
ssa-miR-92a-5p	contig_28651	target from/to=[616,641]	-25.10	PREDICTED: proteinase-activated receptor 3-like [Salmo salar]
ssa-miR-150-3p	contig_30664	target from/to=[2367,2390]	-25.10	PREDICTED: uncharacterized protein LOC106600097, partial [Salmo salar]
ssa-miR-92a-5p	contig_33741	target from/to=[3143,3164]	-25.10	PREDICTED: E3 ubiquitin-protein ligase RNF34 isoform X3 [Salmo salar]
ssa-miR-150-3p	contig_34104	target from/to=[337,355]	-25.10	PREDICTED: sortilin-related receptor isoform X1 [Salmo salar]
ssa-miR-194b-3p	contig_50048	target from/to=[868,890]	-25.10	Deoxyribonuclease gamma precursor [Salmo salar]
ssa-miR-150-3p	contig_58919	target from/to=[589,612]	-25.10	PREDICTED: uncharacterized protein LOC106606290 isoform X4 [Salmo salar]
ssa-miR-462a-3p	contig_66848	target from/to=[31,54]	-25.10	PREDICTED: LOW QUALITY PROTEIN: archaemetzincin-2-like [Salmo salar]
ssa-miR-150-3p	contig_9576	target from/to=[370,393]	-25.10	PREDICTED: uncharacterized protein LOC106569385 [Salmo salar]
ssa-miR-150-3p	contig_21167	target from/to=[1934,1953]	-25.10	PREDICTED: tumor necrosis factor receptor superfamily member 16-like [Salmo salar]
ssa-miR-150-3p	contig_41989	target from/to=[449,469]	-25.10	Myelin protein zero-like protein 2 precursor [Salmo salar]
ssa-miR-128-1-5p	contig_91555	target from/to=[332,352]	-25.10	PREDICTED: solute carrier organic anion transporter family member 4A1-like isoform X1 [Salmo salar]
ssa-miR-18a-5p	contig_2924	target from/to=[115,135]	-25.10	Myelin protein zero-like protein 2 precursor [Salmo salar]
ssa-miR-30a-4-3p	contig_3846	target from/to=[845,866]	-25.10	PREDICTED: proliferating cell nuclear antigen [Salmo salar]
ssa-miR-18a-5p	contig_5809	target from/to=[354,374]	-25.10	PREDICTED: cAMP-dependent protein kinase catalytic subunit beta isoform X3 [Salmo salar]
ssa-miR-8157-3p	contig_6111	target from/to=[2624,2645]	-25.10	PREDICTED: cysteine-rich and transmembrane domain-containing protein 1-like [Salmo salar]
ssa-miR-8157-3p	contig_9867	target from/to=[1218,1242]	-25.10	PREDICTED: kinesin-like protein KIF20A [Salmo salar]
ssa-miR-30a-4-3p	contig_10179	target from/to=[615,636]	-25.10	PREDICTED: uncharacterized protein LOC106581772, partial [Salmo salar]
ssa-miR-8157-3p	contig_10894	target from/to=[1590,1612]	-25.10	PREDICTED: coiled-coil domain-containing protein 61-like isoform X2 [Salmo salar]
ssa-miR-18a-5p	contig_16642	target from/to=[4,24]	-25.10	vacuolar protein sorting 52 [Salmo salar]
ssa-miR-462b-3p	contig_17925	target from/to=[892,913]	-25.10	Granulocyte colony-stimulating factor receptor precursor [Salmo salar]
ssa-miR-18a-5p	contig_33596	target from/to=[49,69]	-25.10	transposase [Salmo salar]
ssa-miR-18a-5p	contig_36637	target from/to=[2297,2317]	-25.10	PREDICTED: HAUS augmin-like complex subunit 7 [Salmo salar]
ssa-miR-8156-5p	contig_37305	target from/to=[197,219]	-25.10	G2/mitotic-specific cyclin-B1 [Salmo salar]
ssa-miR-8157-3p	contig_49046	target from/to=[714,739]	-25.10	PREDICTED: transposon Tf2-1 polyprotein [Salmo salar]
ssa-miR-30a-4-3p	contig_56154	target from/to=[599,619]	-25.10	PREDICTED: uncharacterized protein LOC106597293 [Salmo salar]
ssa-miR-462b-3p	contig_57573	target from/to=[459,480]	-25.10	PREDICTED: zinc fingers and homeoboxes protein 3-like [Salmo salar]
ssa-miR-18a-5p	contig_59105	target from/to=[283,303]	-25.10	Myelin protein zero-like protein 2 precursor [Salmo salar]
ssa-miR-462b-3p	contig_74364	target from/to=[678,701]	-25.10	PREDICTED: uncharacterized protein LOC106612206 [Salmo salar]
ssa-miR-18a-5p	contig_41989	target from/to=[244,264]	-25.10	Myelin protein zero-like protein 2 precursor [Salmo salar]
ssa-miR-30a-4-3p	contig_59970	target from/to=[329,348]	-25.10	PREDICTED: collagen alpha-1(VI) chain-like [Salmo salar]
ssa-miR-150-3p	contig_600	target from/to=[1063,1088]	-25.00	PREDICTED: tubulin alpha-1C chain [Salmo salar]
ssa-miR-138-5p	contig_3371	target from/to=[1447,1472]	-25.00	PREDICTED: CD9 antigen isoform X2 [Salmo salar]
ssa-miR-462a-3p	contig_5140	target from/to=[203,223]	-25.00	SLAM family member 7 precursor [Salmo salar]
ssa-miR-138-5p	contig_5726	target from/to=[3528,3551]	-25.00	PREDICTED: kinesin-like protein KIF11-B [Salmo salar]
ssa-miR-150-3p	contig_7883	target from/to=[1109,1127]	-25.00	voltage-dependent anion channel 2-3 [Salmo salar]
ssa-miR-92a-5p	contig_7889	target from/to=[2628,2651]	-25.00	PREDICTED: clathrin heavy chain 1-like isoform X4 [Salmo salar]
ssa-miR-194a-3p	contig_8730	target from/to=[1317,1340]	-25.00	PREDICTED: nuclear receptor coactivator 4-like isoform X1 [Salmo salar]
ssa-miR-150-3p	contig_9764	target from/to=[772,795]	-25.00	PREDICTED: uncharacterized oxidoreductase Mvan_2161-like [Salmo salar]
ssa-miR-150-3p	contig_12850	target from/to=[3028,3047]	-25.00	PREDICTED: succinyl-CoA ligase [GDP-forming] subunit beta, mitochondrial-like [Salmo salar]
ssa-miR-128-1-5p	contig_16781	target from/to=[1258,1281]	-25.00	PREDICTED: ankyrin repeat and EF-hand domain-containing protein 1-like [Salmo salar]
ssa-miR-138-5p	contig_17573	target from/to=[1714,1736]	-25.00	PREDICTED: transmembrane protein 168-A-like [Salmo salar]
ssa-miR-150-3p	contig_21241	target from/to=[396,415]	-25.00	not available
ssa-miR-462a-3p	contig_23662	target from/to=[1011,1031]	-25.00	PREDICTED: tripartite motif-containing protein 16-like [Salmo salar]
ssa-miR-150-3p	contig_27538	target from/to=[1025,1045]	-25.00	PREDICTED: brain-specific angiogenesis inhibitor 1-associated protein 2-like isoform X2 [Salmo salar]
ssa-miR-15a-5p	contig_30847	target from/to=[7,29]	-25.00	PREDICTED: DNA (cytosine-5)-methyltransferase 3A-like isoform X4 [Salmo salar]
ssa-miR-128-1-5p	contig_31146	target from/to=[255,277]	-25.00	not available
ssa-miR-128-1-5p	contig_34175	target from/to=[1210,1230]	-25.00	PREDICTED: zinc finger protein 385C isoform X1 [Salmo salar]
ssa-miR-150-3p	contig_36211	target from/to=[1162,1180]	-25.00	PREDICTED: lysine-specific demethylase phf2-like [Salmo salar]
ssa-miR-128-1-5p	contig_40907	target from/to=[483,505]	-25.00	not available
ssa-miR-200b-5p	contig_42448	target from/to=[913,936]	-25.00	PREDICTED: proline-rich protein 5-like isoform X2 [Salmo salar]
ssa-miR-138-5p	contig_49255	target from/to=[614,637]	-25.00	PREDICTED: transmembrane protein 41B-like isoform X2 [Salmo salar]
ssa-miR-150-3p	contig_68369	target from/to=[2858,2877]	-25.00	PREDICTED: transcription factor E2F7-like [Salmo salar]
ssa-miR-92a-5p	contig_10439	target from/to=[1219,1241]	-25.00	PREDICTED: protein NLRC3-like [Salmo salar]
ssa-miR-128-1-5p	contig_21226	target from/to=[722,743]	-25.00	NDRG1 [Salmo salar]
ssa-miR-23a-4-5p	contig_54056	target from/to=[2085,2107]	-25.00	PREDICTED: pleckstrin homology domain-containing family H member 1-like [Salmo salar]
ssa-miR-150-3p	contig_61117	target from/to=[823,844]	-25.00	PREDICTED: SH3-containing GRB2-like protein 3-interacting protein 1 isoform X6 [Salmo salar]
ssa-miR-128-1-5p	contig_63283	target from/to=[1736,1757]	-25.00	PREDICTED: ETS translocation variant 5-like isoform X5 [Salmo salar]
ssa-miR-150-3p	contig_80028	target from/to=[728,747]	-25.00	PREDICTED: epidermal growth factor receptor kinase substrate 8-like protein 3 [Salmo salar]
ssa-miR-214-3p	contig_8636	target from/to=[1102,1127]	-25.00	PREDICTED: oocyte zinc finger protein XlCOF19-like [Salmo salar]
ssa-miR-30a-4-3p	contig_8793	target from/to=[1064,1085]	-25.00	PREDICTED: paraspeckle component 1-like [Salmo salar]
ssa-miR-125a-5p	contig_13282	target from/to=[1580,1601]	-25.00	PREDICTED: condensin complex subunit 2-like [Salmo salar]
ssa-miR-8156-5p	contig_27618	target from/to=[1039,1058]	-25.00	General transcription factor II-I repeat domain-containing protein 2B, partial [Salmo salar]
ssa-miR-30a-4-3p	contig_28503	target from/to=[328,350]	-25.00	PREDICTED: uncharacterized protein LOC106613429 [Salmo salar]
ssa-miR-8157-3p	contig_43592	target from/to=[1695,1714]	-25.00	PREDICTED: dematin isoform X5 [Salmo salar]
ssa-miR-8157-3p	contig_43592	target from/to=[1715,1734]	-25.00	PREDICTED: dematin isoform X5 [Salmo salar]
ssa-miR-8157-3p	contig_43592	target from/to=[1720,1741]	-25.00	PREDICTED: dematin isoform X5 [Salmo salar]
ssa-miR-125b-5p	contig_103042	target from/to=[811,837]	-25.00	PREDICTED: ribonuclease ZC3H12A [Salmo salar]
ssa-miR-92a-5p	contig_2464	target from/to=[728,754]	-24.90	PREDICTED: uncharacterized protein LOC106587367 isoform X1 [Salmo salar]
ssa-miR-150-3p	contig_2724	target from/to=[3201,3222]	-24.90	PREDICTED: protein kinase C and casein kinase substrate in neurons protein 1-like isoform X1 [Salmo salar]
ssa-miR-150-3p	contig_2766	target from/to=[2783,2803]	-24.90	PREDICTED: kelch-like protein 20 isoform X1 [Salmo salar]
ssa-miR-150-3p	contig_6003	target from/to=[1161,1181]	-24.90	PREDICTED: rac GTPase-activating protein 1 [Salmo salar]
ssa-miR-150-3p	contig_6424	target from/to=[1407,1430]	-24.90	PREDICTED: cytosolic 5'-nucleotidase 1A-like [Salmo salar]
ssa-miR-150-3p	contig_7220	target from/to=[4106,4128]	-24.90	PREDICTED: kinesin-like protein KIF20A isoform X1 [Salmo salar]
ssa-miR-150-3p	contig_11035	target from/to=[257,280]	-24.90	PREDICTED: olfactory receptor 11A1-like [Salmo salar]
ssa-miR-150-3p	contig_18092	target from/to=[1494,1517]	-24.90	PREDICTED: zinc finger protein 358-like [Salmo salar]
ssa-miR-128-1-5p	contig_36191	target from/to=[3439,3462]	-24.90	PREDICTED: mitogen-activated protein kinase kinase kinase MLK4-like isoform X1 [Salmo salar]
ssa-miR-128-1-5p	contig_39522	target from/to=[11,34]	-24.90	PREDICTED: cytoplasmic dynein 1 heavy chain 1 isoform X1 [Salmo salar]
ssa-miR-92a-5p	contig_41717	target from/to=[934,955]	-24.90	PREDICTED: bifunctional ATP-dependent dihydroxyacetone kinase/FAD-AMP lyase (cyclizing) [Salmo salar]
ssa-miR-194a-3p	contig_44117	target from/to=[1345,1368]	-24.90	Transcription factor 21 [Salmo salar]
ssa-miR-128-1-5p	contig_44287	target from/to=[1755,1778]	-24.90	aryl hydrocarbon receptor 1 beta-like protein [Salmo salar]
ssa-miR-23a-4-5p	contig_45033	target from/to=[591,611]	-24.90	PREDICTED: uncharacterized protein DDB_G0290685-like [Salmo salar]
ssa-miR-150-3p	contig_52588	target from/to=[1022,1042]	-24.90	PREDICTED: claudin-11-like isoform X1 [Salmo salar]
ssa-miR-150-3p	contig_56512	target from/to=[425,446]	-24.90	PREDICTED: ras-related GTP-binding protein C isoform X2 [Salmo salar]
ssa-miR-150-3p	contig_134732	target from/to=[397,423]	-24.90	PREDICTED: zinc finger protein GLI2-like [Salmo salar]
ssa-miR-150-3p	contig_33272	target from/to=[2181,2200]	-24.90	PREDICTED: excitatory amino acid transporter 3-like [Salmo salar]
ssa-miR-150-3p	contig_51049	target from/to=[1317,1335]	-24.90	PREDICTED: zinc finger CCCH domain-containing protein 11A-like isoform X4 [Salmo salar]
ssa-miR-205a-5p	contig_11283	target from/to=[3944,3963]	-24.90	PREDICTED: two pore calcium channel protein 1 isoform X2 [Salmo salar]
ssa-miR-462b-3p	contig_14686	target from/to=[3315,3337]	-24.90	PREDICTED: cationic amino acid transporter 3-like [Salmo salar]
ssa-miR-8157-3p	contig_15587	target from/to=[490,510]	-24.90	PREDICTED: tyrosine-protein phosphatase non-receptor type 21-like isoform X2 [Salmo salar]
ssa-miR-30a-4-3p	contig_17163	target from/to=[301,323]	-24.90	PREDICTED: proteoglycan 4-like [Salmo salar]
ssa-miR-19c-3-5p	contig_25168	target from/to=[625,650]	-24.90	Interferon-induced GTP-binding protein Mx [Salmo salar]
ssa-miR-8157-3p	contig_32838	target from/to=[2256,2277]	-24.90	PREDICTED: putative nuclease HARBI1 [Salmo salar]
ssa-miR-128-3p	contig_43856	target from/to=[1369,1389]	-24.90	PREDICTED: dedicator of cytokinesis protein 3-like isoform X4 [Salmo salar]
ssa-miR-142b-3p	contig_44243	target from/to=[310,333]	-24.90	PREDICTED: ATP-dependent Clp protease ATP-binding subunit clpX-like, mitochondrial isoform X2 [Salmo salar]
ssa-miR-106b-3p	contig_12704	target from/to=[196,222]	-24.80	PREDICTED: apoptosis-inducing factor 3-like isoform X1 [Salmo salar]
ssa-miR-138-5p	contig_15402	target from/to=[381,402]	-24.80	PREDICTED: ventricular zone-expressed PH domain-containing protein-like, partial [Salmo salar]
ssa-miR-449b-5p	contig_20655	target from/to=[1174,1194]	-24.80	PREDICTED: sodium-coupled neutral amino acid transporter 3-like isoform X2 [Salmo salar]
ssa-miR-150-3p	contig_21769	target from/to=[1439,1460]	-24.80	Leucine carboxyl methyltransferase 1 [Salmo salar]
ssa-miR-192a-3p	contig_29309	target from/to=[2118,2139]	-24.80	PREDICTED: peripheral-type benzodiazepine receptor-associated protein 1-like isoform X9 [Salmo salar]
ssa-miR-150-3p	contig_32936	target from/to=[2472,2492]	-24.80	PREDICTED: ATP-binding cassette sub-family G member 2 isoform X1 [Salmo salar]
ssa-miR-192b-5p	contig_33226	target from/to=[1851,1871]	-24.80	BTG3 [Salmo salar]
ssa-miR-128-1-5p	contig_34316	target from/to=[2562,2585]	-24.80	PREDICTED: protein enabled homolog [Salmo salar]
ssa-miR-128-1-5p	contig_36948	target from/to=[2356,2379]	-24.80	PREDICTED: ankyrin repeat and EF-hand domain-containing protein 1-like [Salmo salar]
ssa-miR-128-1-5p	contig_41244	target from/to=[2255,2275]	-24.80	UPF0527 membrane protein [Salmo salar]
ssa-miR-449b-5p	contig_43891	target from/to=[151,173]	-24.80	PREDICTED: succinate dehydrogenase assembly factor 2, mitochondrial isoform X1 [Salmo salar]
ssa-miR-133a-3p	contig_44287	target from/to=[963,986]	-24.80	aryl hydrocarbon receptor 1 beta-like protein [Salmo salar]
ssa-miR-194a-3p	contig_49413	target from/to=[1078,1102]	-24.80	PREDICTED: protein FAM118B-like isoform X2 [Salmo salar]
ssa-miR-128-1-5p	contig_59015	target from/to=[3670,3693]	-24.80	PREDICTED: AT-rich interactive domain-containing protein 5B-like [Salmo salar]
ssa-miR-150-3p	contig_69489	target from/to=[1052,1074]	-24.80	PREDICTED: ubiquitin-conjugating enzyme E2 G1 isoform X1 [Salmo salar]
ssa-miR-194b-3p	contig_76728	target from/to=[110,132]	-24.80	PREDICTED: proline-rich receptor-like protein kinase PERK8 [Salmo salar]
ssa-miR-15a-5p	contig_86009	target from/to=[438,460]	-24.80	PREDICTED: GTP:AMP phosphotransferase AK3, mitochondrial isoform X2 [Salmo salar]
ssa-miR-128-1-5p	contig_37431	target from/to=[1438,1463]	-24.80	PREDICTED: probable G-protein coupled receptor 157 isoform X1 [Salmo salar]
ssa-miR-128-1-5p	contig_74757	target from/to=[1877,1901]	-24.80	PREDICTED: solute carrier family 12 member 3-like [Salmo salar]
ssa-miR-214-3p	contig_5726	target from/to=[2672,2692]	-24.80	PREDICTED: kinesin-like protein KIF11-B [Salmo salar]
ssa-miR-8157-3p	contig_13387	target from/to=[3017,3037]	-24.80	PREDICTED: nuclear receptor-binding protein 2-like [Salmo salar]
ssa-miR-30a-4-3p	contig_16254	target from/to=[2952,2974]	-24.80	SLAM family member 7 precursor [Salmo salar]
ssa-miR-30a-4-3p	contig_38404	target from/to=[1123,1144]	-24.80	PREDICTED: moesin-like [Salmo salar]
ssa-miR-125a-5p	contig_69224	target from/to=[7834,7854]	-24.80	PREDICTED: apolipoprotein B-100 isoform X3 [Salmo salar]
ssa-miR-30a-4-3p	contig_5122	target from/to=[109,129]	-24.80	BOLA class I histocompatibility antigen, alpha chain BL3-7 precursor [Salmo salar]
ssa-miR-214-3p	contig_21820	target from/to=[1791,1816]	-24.80	PREDICTED: proheparin-binding EGF-like growth factor [Salmo salar]
ssa-miR-30a-4-3p	contig_74297	target from/to=[1392,1415]	-24.80	PREDICTED: protocadherin Fat 1-like isoform X5 [Salmo salar]
ssa-miR-214-3p	contig_153377	target from/to=[20,42]	-24.80	PREDICTED: neuroligin-3-like isoform X3 [Salmo salar]
ssa-miR-23a-4-5p	contig_1841	target from/to=[1859,1882]	-24.70	PREDICTED: biliverdin reductase A [Salmo salar]
ssa-miR-128-1-5p	contig_5801	target from/to=[1599,1621]	-24.70	Cysteine desulfurase, mitochondrial precursor [Salmo salar]
ssa-miR-128-1-5p	contig_6424	target from/to=[1408,1435]	-24.70	PREDICTED: cytosolic 5'-nucleotidase 1A-like [Salmo salar]
ssa-miR-128-1-5p	contig_11643	target from/to=[163,183]	-24.70	PREDICTED: uncharacterized protein C12orf73 homolog [Salmo salar]
ssa-miR-150-3p	contig_13692	target from/to=[1295,1317]	-24.70	PREDICTED: centromere protein O-like [Salmo salar]
ssa-miR-150-3p	contig_17528	target from/to=[1164,1186]	-24.70	Microsomal glutathione S-transferase 3 [Salmo salar]
ssa-miR-150-3p	contig_21120	target from/to=[248,269]	-24.70	Transposable element Tc1 transposase [Salmo salar]
ssa-miR-128-1-5p	contig_21752	target from/to=[1360,1381]	-24.70	PREDICTED: BTB/POZ domain-containing adapter for CUL3-mediated RhoA degradation protein 2 isoform X1 [Salmo salar]
ssa-miR-150-3p	contig_26537	target from/to=[1728,1750]	-24.70	PREDICTED: bromodomain-containing protein 1-like, partial [Salmo salar]
ssa-miR-150-3p	contig_36470	target from/to=[331,351]	-24.70	FGF2 [Salmo salar]
ssa-miR-128-1-5p	contig_40521	target from/to=[2056,2079]	-24.70	PREDICTED: zinc finger protein 227-like [Salmo salar]
ssa-miR-449b-5p	contig_46564	target from/to=[2781,2802]	-24.70	hypothetical protein, partial [Salmo salar]
ssa-miR-449b-5p	contig_96373	target from/to=[229,248]	-24.70	transposase [Salmo salar]
ssa-miR-92a-5p	contig_107797	target from/to=[441,464]	-24.70	not available
ssa-miR-15a-5p	contig_21167	target from/to=[1580,1603]	-24.70	PREDICTED: tumor necrosis factor receptor superfamily member 16-like [Salmo salar]
ssa-miR-128-1-5p	contig_21167	target from/to=[1959,1980]	-24.70	PREDICTED: tumor necrosis factor receptor superfamily member 16-like [Salmo salar]
ssa-miR-192b-5p	contig_21226	target from/to=[633,654]	-24.70	NDRG1 [Salmo salar]
ssa-miR-192a-3p	contig_21226	target from/to=[633,654]	-24.70	NDRG1 [Salmo salar]
ssa-miR-194a-3p	contig_45806	target from/to=[79,98]	-24.70	PREDICTED: allograft inflammatory factor 1-like isoform X1 [Salmo salar]
ssa-miR-138-5p	contig_68015	target from/to=[1551,1573]	-24.70	PREDICTED: hydroxyacid-oxoacid transhydrogenase, mitochondrial isoform X2 [Salmo salar]
ssa-miR-92a-5p	contig_176333	target from/to=[521,539]	-24.70	PREDICTED: claudin-3-like [Salmo salar]
ssa-miR-8156-5p	contig_2347	target from/to=[1157,1179]	-24.70	PREDICTED: AN1-type zinc finger protein 3-like isoform X2 [Salmo salar]
ssa-miR-462b-3p	contig_17573	target from/to=[2361,2382]	-24.70	PREDICTED: transmembrane protein 168-A-like [Salmo salar]
ssa-miR-125b-5p	contig_31191	target from/to=[2131,2153]	-24.70	PREDICTED: tectonic-2 [Salmo salar]
ssa-miR-8157-3p	contig_44096	target from/to=[747,767]	-24.70	PREDICTED: retinol dehydrogenase 12-like isoform X1 [Salmo salar]
ssa-miR-8157-3p	contig_47355	target from/to=[267,289]	-24.70	ORF2 protein [Salmo salar]
ssa-miR-30a-4-3p	contig_50352	target from/to=[2845,2866]	-24.70	hypothetical protein, partial [Salmo salar]
ssa-miR-30a-4-3p	contig_53007	target from/to=[3235,3257]	-24.70	PREDICTED: nuclear receptor ROR-beta-like [Salmo salar]
ssa-miR-8156-5p	contig_61597	target from/to=[2036,2056]	-24.70	PREDICTED: protein-methionine sulfoxide oxidase MICAL2-like isoform X7 [Salmo salar]
ssa-miR-125b-5p	contig_69224	target from/to=[7834,7854]	-24.70	PREDICTED: apolipoprotein B-100 isoform X3 [Salmo salar]
ssa-miR-30a-4-3p	contig_91657	target from/to=[674,695]	-24.70	PREDICTED: FRAS1-related extracellular matrix protein 2-like, partial [Salmo salar]
ssa-miR-8157-3p	contig_92028	target from/to=[250,273]	-24.70	PREDICTED: protein SPT2 homolog isoform X2 [Salmo salar]
ssa-miR-375-3p	contig_22955	target from/to=[1137,1161]	-24.70	PREDICTED: 3-keto-steroid reductase-like isoform X2 [Salmo salar]
ssa-miR-551-3p	contig_39848	target from/to=[1376,1394]	-24.70	PREDICTED: UPF0317 protein C14orf159 homolog, mitochondrial isoform X1 [Salmo salar]
ssa-miR-30a-4-3p	contig_42658	target from/to=[2980,3002]	-24.70	PREDICTED: hormone-sensitive lipase-like [Salmo salar]
ssa-miR-8156-5p	contig_59970	target from/to=[344,364]	-24.70	PREDICTED: collagen alpha-1(VI) chain-like [Salmo salar]
ssa-miR-30a-4-3p	contig_127895	target from/to=[535,556]	-24.70	PREDICTED: uncharacterized protein LOC106577654 [Salmo salar]
ssa-miR-150-3p	contig_1779	target from/to=[1258,1277]	-24.60	PREDICTED: protein FAM83D-like isoform X1 [Salmo salar]
ssa-miR-128-1-5p	contig_3571	target from/to=[3156,3176]	-24.60	PREDICTED: myotubularin-related protein 3-like isoform X2 [Salmo salar]
ssa-miR-128-1-5p	contig_3715	target from/to=[14,38]	-24.60	PREDICTED: coiled-coil domain-containing protein 97-like, partial [Salmo salar]
ssa-miR-150-3p	contig_5005	target from/to=[835,858]	-24.60	not available
ssa-miR-128-1-5p	contig_5726	target from/to=[2959,2980]	-24.60	PREDICTED: kinesin-like protein KIF11-B [Salmo salar]
ssa-miR-150-3p	contig_5809	target from/to=[3142,3166]	-24.60	PREDICTED: cAMP-dependent protein kinase catalytic subunit beta isoform X3 [Salmo salar]
ssa-miR-150-3p	contig_6923	target from/to=[1152,1171]	-24.60	PREDICTED: protein FAM83D-like [Salmo salar]
ssa-miR-128-1-5p	contig_6981	target from/to=[665,686]	-24.60	LYR motif-containing protein 5 [Salmo salar]
ssa-miR-192b-5p	contig_7558	target from/to=[1885,1908]	-24.60	PREDICTED: ATP-binding cassette sub-family D member 2-like [Salmo salar]
ssa-miR-128-1-5p	contig_9867	target from/to=[2653,2679]	-24.60	PREDICTED: kinesin-like protein KIF20A [Salmo salar]
ssa-miR-150-3p	contig_11283	target from/to=[6465,6484]	-24.60	PREDICTED: two pore calcium channel protein 1 isoform X2 [Salmo salar]
ssa-miR-194b-3p	contig_12760	target from/to=[1955,1975]	-24.60	PREDICTED: vacuolar protein sorting-associated protein 52 homolog [Salmo salar]
ssa-miR-150-3p	contig_15237	target from/to=[95,114]	-24.60	PREDICTED: zinc transporter ZIP11-like isoform X2 [Salmo salar]
ssa-miR-128-1-5p	contig_16642	target from/to=[221,244]	-24.60	vacuolar protein sorting 52 [Salmo salar]
ssa-miR-194b-3p	contig_17975	target from/to=[857,877]	-24.60	PREDICTED: zinc finger MYM-type protein 1-like isoform X1 [Salmo salar]
ssa-miR-150-3p	contig_21116	target from/to=[2528,2551]	-24.60	PREDICTED: rabankyrin-5 isoform X2 [Salmo salar]
ssa-miR-150-3p	contig_23033	target from/to=[1506,1527]	-24.60	not available
ssa-miR-92a-5p	contig_28135	target from/to=[1239,1262]	-24.60	PREDICTED: protein FAM127-like [Salmo salar]
ssa-miR-15a-5p	contig_29309	target from/to=[728,749]	-24.60	PREDICTED: peripheral-type benzodiazepine receptor-associated protein 1-like isoform X9 [Salmo salar]
ssa-miR-150-3p	contig_31308	target from/to=[2312,2333]	-24.60	aryl hydrocarbon receptor 1 beta-like protein [Salmo salar]
ssa-miR-150-3p	contig_36211	target from/to=[1860,1882]	-24.60	PREDICTED: lysine-specific demethylase phf2-like [Salmo salar]
ssa-miR-489-3p	contig_38860	target from/to=[120,140]	-24.60	transposase [Salmo salar]
ssa-miR-128-1-5p	contig_45077	target from/to=[557,579]	-24.60	PREDICTED: zinc finger protein OZF-like isoform X2 [Salmo salar]
ssa-miR-192b-5p	contig_50786	target from/to=[72,94]	-24.60	COL11A2, partial [Salmo salar]
ssa-miR-194b-3p	contig_70296	target from/to=[42,63]	-24.60	PREDICTED: coagulation factor V-like [Salmo salar]
ssa-miR-194b-3p	contig_88656	target from/to=[44,66]	-24.60	PREDICTED: glutenin, high molecular weight subunit DY10-like isoform X1 [Salmo salar]
ssa-miR-192b-5p	contig_89722	target from/to=[1260,1284]	-24.60	not available
ssa-miR-150-3p	contig_90916	target from/to=[882,903]	-24.60	transposase [Salmo salar]
ssa-miR-150-3p	contig_91606	target from/to=[488,512]	-24.60	PREDICTED: aryl hydrocarbon receptor-like [Salmo salar]
ssa-miR-138-5p	contig_121763	target from/to=[162,185]	-24.60	not available
ssa-miR-150-3p	contig_21700	target from/to=[272,296]	-24.60	PREDICTED: leiomodin-1-like [Salmo salar]
ssa-miR-128-1-5p	contig_39710	target from/to=[535,557]	-24.60	PREDICTED: uncharacterized protein LOC106570150 [Salmo salar]
ssa-miR-150-3p	contig_105345	target from/to=[1328,1348]	-24.60	PREDICTED: tight junction protein ZO-3-like isoform X1 [Salmo salar]
ssa-miR-462b-3p	contig_2766	target from/to=[2542,2565]	-24.60	PREDICTED: kelch-like protein 20 isoform X1 [Salmo salar]
ssa-miR-462b-3p	contig_29914	target from/to=[844,864]	-24.60	PREDICTED: ventricular zone-expressed PH domain-containing protein-like, partial [Salmo salar]
ssa-miR-214-3p	contig_34316	target from/to=[3153,3179]	-24.60	PREDICTED: protein enabled homolog [Salmo salar]
ssa-miR-214-3p	contig_45033	target from/to=[546,568]	-24.60	PREDICTED: uncharacterized protein DDB_G0290685-like [Salmo salar]
ssa-miR-202-5p	contig_48980	target from/to=[949,970]	-24.60	PREDICTED: ras-related protein Rab-36-like isoform X3 [Salmo salar]
ssa-miR-8157-3p	contig_74000	target from/to=[1333,1355]	-24.60	PREDICTED: ankyrin repeat and IBR domain-containing protein 1-like [Salmo salar]
ssa-miR-8157-3p	contig_112447	target from/to=[56,76]	-24.60	PREDICTED: transient receptor potential cation channel subfamily A member 1-like, partial [Salmo salar]
ssa-miR-8157-3p	contig_66401	target from/to=[837,858]	-24.60	PREDICTED: sodium- and chloride-dependent GABA transporter 2-like isoform X2 [Salmo salar]
ssa-miR-200b-5p	contig_194	target from/to=[2333,2353]	-24.50	PREDICTED: protein MMS22-like isoform X1 [Salmo salar]
ssa-miR-128-1-5p	contig_7088	target from/to=[2462,2484]	-24.50	PREDICTED: ralA-binding protein 1 [Salmo salar]
ssa-miR-128-1-5p	contig_8144	target from/to=[625,647]	-24.50	PREDICTED: uncharacterized protein KIAA0895-like isoform X4 [Salmo salar]
ssa-miR-92a-5p	contig_8347	target from/to=[222,245]	-24.50	PREDICTED: E3 ubiquitin/ISG15 ligase TRIM25-like [Salmo salar]
ssa-miR-150-3p	contig_9992	target from/to=[488,510]	-24.50	PREDICTED: actin-binding protein anillin-like isoform X4 [Salmo salar]
ssa-miR-128-1-5p	contig_17362	target from/to=[1852,1873]	-24.50	MACRO domain-containing protein 1 [Salmo salar]
ssa-miR-150-3p	contig_20906	target from/to=[449,469]	-24.50	PREDICTED: keratin-associated protein 21-1-like [Salmo salar]
ssa-miR-150-3p	contig_22634	target from/to=[2589,2609]	-24.50	not available
ssa-miR-194a-3p	contig_23370	target from/to=[744,766]	-24.50	PREDICTED: macrophage mannose receptor 1-like [Salmo salar]
ssa-miR-150-3p	contig_27578	target from/to=[434,455]	-24.50	PREDICTED: transposon Tf2-1 polyprotein [Salmo salar]
ssa-miR-150-3p	contig_33765	target from/to=[1643,1664]	-24.50	PREDICTED: sodium/potassium/calcium exchanger 4-like isoform X2 [Salmo salar]
ssa-miR-150-3p	contig_41933	target from/to=[749,770]	-24.50	PREDICTED: uncharacterized protein C15orf41 homolog [Salmo salar]
ssa-miR-128-1-5p	contig_48386	target from/to=[1819,1843]	-24.50	PREDICTED: protocadherin-16-like [Salmo salar]
ssa-miR-150-3p	contig_103042	target from/to=[1479,1503]	-24.50	PREDICTED: ribonuclease ZC3H12A [Salmo salar]
ssa-miR-128-1-5p	contig_21167	target from/to=[1454,1476]	-24.50	PREDICTED: tumor necrosis factor receptor superfamily member 16-like [Salmo salar]
ssa-miR-30a-4-3p	contig_5772	target from/to=[1674,1697]	-24.50	transposase [Salmo salar]
ssa-miR-214-3p	contig_8022	target from/to=[1593,1617]	-24.50	CD83, partial [Salmo salar]
ssa-miR-8157-3p	contig_26179	target from/to=[1020,1043]	-24.50	PREDICTED: transcription factor SOX-4-like [Salmo salar]
ssa-miR-8157-3p	contig_28135	target from/to=[150,169]	-24.50	PREDICTED: protein FAM127-like [Salmo salar]
ssa-miR-30a-4-3p	contig_30457	target from/to=[283,304]	-24.50	PREDICTED: carnitine O-acetyltransferase-like [Salmo salar]
ssa-miR-214-3p	contig_35464	target from/to=[430,454]	-24.50	PREDICTED: synergin gamma-like isoform X7 [Salmo salar]
ssa-miR-128-3p	contig_36211	target from/to=[906,928]	-24.50	PREDICTED: lysine-specific demethylase phf2-like [Salmo salar]
ssa-miR-19c-3-5p	contig_37177	target from/to=[1626,1649]	-24.50	PREDICTED: vacuolar protein sorting-associated protein 37B-like [Salmo salar]
ssa-miR-8157-3p	contig_88571	target from/to=[249,270]	-24.50	PREDICTED: carbohydrate sulfotransferase 15-like isoform X3 [Salmo salar]
ssa-miR-133a-3p	contig_49046	target from/to=[569,590]	-24.44	PREDICTED: transposon Tf2-1 polyprotein [Salmo salar]
ssa-miR-459-3p	contig_194	target from/to=[2223,2244]	-24.40	PREDICTED: protein MMS22-like isoform X1 [Salmo salar]
ssa-miR-128-1-5p	contig_1881	target from/to=[1937,1962]	-24.40	PREDICTED: ral guanine nucleotide dissociation stimulator-like 2 isoform X3 [Salmo salar]
ssa-miR-150-3p	contig_5005	target from/to=[1206,1226]	-24.40	not available
ssa-miR-150-3p	contig_9110	target from/to=[1021,1044]	-24.40	Nicotinamide riboside kinase 2 [Salmo salar]
ssa-miR-128-1-5p	contig_10307	target from/to=[1891,1912]	-24.40	PREDICTED: dnaJ homolog subfamily B member 5-like isoform X1 [Salmo salar]
ssa-miR-150-3p	contig_25993	target from/to=[239,260]	-24.40	PREDICTED: tryptophan 2,3-dioxygenase A-like [Salmo salar]
ssa-miR-462a-3p	contig_29047	target from/to=[1836,1856]	-24.40	collagen Type XI Alpha2 [Salmo salar]
ssa-miR-150-3p	contig_39648	target from/to=[325,346]	-24.40	PREDICTED: anion exchange protein 2-like isoform X1 [Salmo salar]
ssa-miR-150-3p	contig_39649	target from/to=[325,346]	-24.40	PREDICTED: anion exchange protein 2-like isoform X1 [Salmo salar]
ssa-miR-194a-3p	contig_50035	target from/to=[402,424]	-24.40	PREDICTED: neuropeptide Y receptor type 1-like [Salmo salar]
ssa-miR-194a-3p	contig_59015	target from/to=[3211,3235]	-24.40	PREDICTED: AT-rich interactive domain-containing protein 5B-like [Salmo salar]
ssa-miR-138-5p	contig_68369	target from/to=[1367,1389]	-24.40	PREDICTED: transcription factor E2F7-like [Salmo salar]
ssa-miR-150-3p	contig_68369	target from/to=[3464,3487]	-24.40	PREDICTED: transcription factor E2F7-like [Salmo salar]
ssa-miR-150-3p	contig_72661	target from/to=[1493,1514]	-24.40	PREDICTED: testis-expressed sequence 11 protein isoform X5 [Salmo salar]
ssa-miR-138-5p	contig_74891	target from/to=[544,567]	-24.40	not available
ssa-miR-212a-5p	contig_75620	target from/to=[721,743]	-24.40	not available
ssa-miR-150-3p	contig_39848	target from/to=[2486,2507]	-24.40	PREDICTED: UPF0317 protein C14orf159 homolog, mitochondrial isoform X1 [Salmo salar]
ssa-miR-128-1-5p	contig_62664	target from/to=[1081,1104]	-24.40	PREDICTED: protein amnionless-like [Salmo salar]
ssa-miR-150-3p	contig_110942	target from/to=[145,165]	-24.40	PREDICTED: vegetative cell wall protein gp1-like [Salmo salar]
ssa-miR-202-5p	contig_7400	target from/to=[918,941]	-24.40	PREDICTED: nucleolar protein 7 [Salmo salar]
ssa-miR-30a-4-3p	contig_10757	target from/to=[1065,1088]	-24.40	PREDICTED: protein C19orf12 homolog isoform X2 [Salmo salar]
ssa-miR-19c-3p	contig_11958	target from/to=[4263,4284]	-24.40	PREDICTED: vacuolar fusion protein MON1 homolog B-like [Salmo salar]
ssa-miR-8157-3p	contig_17573	target from/to=[2123,2146]	-24.40	PREDICTED: transmembrane protein 168-A-like [Salmo salar]
ssa-miR-8157-3p	contig_31777	target from/to=[2086,2108]	-24.40	PREDICTED: SNARE-associated protein Snapin-like isoform X2 [Salmo salar]
ssa-miR-125a-5p	contig_36191	target from/to=[3627,3648]	-24.40	PREDICTED: mitogen-activated protein kinase kinase kinase MLK4-like isoform X1 [Salmo salar]
ssa-miR-8157-3p	contig_45200	target from/to=[46,68]	-24.40	PREDICTED: heat-stable enterotoxin receptor-like [Salmo salar]
ssa-miR-205a-5p	contig_55399	target from/to=[80,99]	-24.40	not available
ssa-miR-30a-4-3p	contig_59105	target from/to=[447,468]	-24.40	Myelin protein zero-like protein 2 precursor [Salmo salar]
ssa-miR-8157-3p	contig_62022	target from/to=[80,102]	-24.40	not available
ssa-miR-202-5p	contig_30325	target from/to=[231,252]	-24.40	not available
ssa-miR-30a-4-3p	contig_76905	target from/to=[1535,1554]	-24.40	PREDICTED: inverted formin-2-like [Salmo salar]
ssa-miR-128-1-5p	contig_4802	target from/to=[1452,1477]	-24.30	NEDD8 ultimate buster 1 [Salmo salar]
ssa-miR-150-3p	contig_16078	target from/to=[146,164]	-24.30	PREDICTED: dehydrogenase/reductase SDR family member 7 [Salmo salar]
ssa-miR-449b-5p	contig_18004	target from/to=[256,280]	-24.30	PREDICTED: SUMO-specific isopeptidase USPL1-like, partial [Salmo salar]
ssa-miR-138-5p	contig_18293	target from/to=[1681,1701]	-24.30	PREDICTED: uncharacterized protein LOC106607495 isoform X1 [Salmo salar]
ssa-miR-194b-3p	contig_22577	target from/to=[1458,1479]	-24.30	Interferon-related developmental regulator 2 [Salmo salar]
ssa-miR-150-3p	contig_36666	target from/to=[2316,2339]	-24.30	Rhomboid domain-containing protein 1 [Salmo salar]
ssa-miR-150-3p	contig_43570	target from/to=[1274,1294]	-24.30	PREDICTED: calcium-binding protein 39-like [Salmo salar]
ssa-miR-128-1-5p	contig_45826	target from/to=[1177,1198]	-24.30	not available
ssa-miR-23a-4-5p	contig_52629	target from/to=[3339,3361]	-24.30	PREDICTED: uncharacterized protein LOC106588271 [Salmo salar]
ssa-miR-150-3p	contig_53007	target from/to=[3773,3793]	-24.30	PREDICTED: nuclear receptor ROR-beta-like [Salmo salar]
ssa-miR-449a-5p	contig_56376	target from/to=[334,353]	-24.30	PREDICTED: E3 ubiquitin-protein ligase SMURF2-like [Salmo salar]
ssa-miR-150-3p	contig_57200	target from/to=[466,487]	-24.30	PREDICTED: acidic leucine-rich nuclear phosphoprotein 32 family member B-like isoform X1 [Salmo salar]
ssa-miR-150-3p	contig_75196	target from/to=[356,380]	-24.30	not available
ssa-miR-128-1-5p	contig_77343	target from/to=[2089,2111]	-24.30	PREDICTED: alpha-2A adrenergic receptor-like [Salmo salar]
ssa-miR-150-3p	contig_78543	target from/to=[13,34]	-24.30	PREDICTED: sorting nexin-5-like [Salmo salar]
ssa-miR-128-1-5p	contig_4985	target from/to=[900,920]	-24.30	PREDICTED: serine/threonine-protein kinase BRSK2-like isoform X3 [Salmo salar]
ssa-miR-150-3p	contig_17739	target from/to=[1075,1095]	-24.30	PREDICTED: LRP2-binding protein isoform X1 [Salmo salar]
ssa-miR-192b-5p	contig_21167	target from/to=[1827,1848]	-24.30	PREDICTED: tumor necrosis factor receptor superfamily member 16-like [Salmo salar]
ssa-miR-459-3p	contig_34150	target from/to=[216,238]	-24.30	Vacuolar ATP synthase catalytic subunit A [Salmo salar]
ssa-miR-138-5p	contig_40026	target from/to=[1796,1817]	-24.30	PREDICTED: SH3 domain and tetratricopeptide repeat-containing protein 1-like [Salmo salar]
ssa-miR-138-5p	contig_48655	target from/to=[1601,1623]	-24.30	Formimidoyltransferase-cyclodeaminase [Salmo salar]
ssa-miR-30b-3p	contig_56299	target from/to=[105,125]	-24.30	PREDICTED: CD151 antigen-like [Salmo salar]
ssa-miR-106b-3p	contig_64261	target from/to=[1253,1275]	-24.30	PREDICTED: glucose-6-phosphate translocase-like [Salmo salar]
ssa-miR-150-3p	contig_70641	target from/to=[2457,2479]	-24.30	PREDICTED: apoptosis-inducing factor 3-like isoform X1 [Salmo salar]
ssa-miR-150-3p	contig_187845	target from/to=[1295,1317]	-24.30	PREDICTED: solute carrier family 22 member 7-like [Salmo salar]
ssa-miR-30a-4-3p	contig_6923	target from/to=[1443,1464]	-24.30	PREDICTED: protein FAM83D-like [Salmo salar]
ssa-miR-8157-3p	contig_16458	target from/to=[1544,1566]	-24.30	PREDICTED: transcription factor SOX-6-like isoform X2 [Salmo salar]
ssa-miR-462b-3p	contig_31430	target from/to=[327,349]	-24.30	PREDICTED: SAC3 domain-containing protein 1 isoform X3 [Salmo salar]
ssa-miR-150-5p	contig_40864	target from/to=[2113,2131]	-24.30	Tumor necrosis factor receptor superfamily member 6 precursor [Salmo salar]
ssa-miR-462b-3p	contig_41209	target from/to=[1652,1674]	-24.30	PREDICTED: nuclear factor 7, brain-like [Salmo salar]
ssa-miR-462b-3p	contig_74472	target from/to=[1210,1231]	-24.30	PREDICTED: S-antigen protein-like [Salmo salar]
ssa-miR-8157-3p	contig_75724	target from/to=[1063,1084]	-24.30	PREDICTED: BUD13 homolog [Salmo salar]
ssa-miR-8157-3p	contig_41698	target from/to=[933,955]	-24.30	PREDICTED: 25-hydroxycholesterol 7-alpha-hydroxylase-like [Salmo salar]
ssa-miR-30b-5p	contig_59760	target from/to=[1412,1436]	-24.30	PREDICTED: thrombospondin-1-like [Salmo salar]
ssa-miR-194a-3p	contig_97	target from/to=[458,482]	-24.20	Ferritin, heavy subunit [Salmo salar]
ssa-miR-150-3p	contig_7514	target from/to=[526,545]	-24.20	Transposable element Tcb1 transposase [Salmo salar]
ssa-miR-92a-5p	contig_12767	target from/to=[540,564]	-24.20	Proteasome subunit beta type-7 precursor [Salmo salar]
ssa-miR-128-1-5p	contig_14686	target from/to=[3053,3075]	-24.20	PREDICTED: cationic amino acid transporter 3-like [Salmo salar]
ssa-miR-8162-3p	contig_18720	target from/to=[2306,2326]	-24.20	PREDICTED: sterile alpha motif domain-containing protein 9-like [Salmo salar]
ssa-miR-138-5p	contig_21942	target from/to=[1007,1029]	-24.20	PREDICTED: protein ARV1 [Salmo salar]
ssa-miR-128-1-5p	contig_31870	target from/to=[1073,1093]	-24.20	PREDICTED: 28S ribosomal protein S10, mitochondrial [Salmo salar]
ssa-miR-150-3p	contig_33226	target from/to=[988,1011]	-24.20	BTG3 [Salmo salar]
ssa-miR-23a-4-5p	contig_33459	target from/to=[1,16]	-24.20	PREDICTED: beta-1,3-glucosyltransferase-like isoform X3 [Salmo salar]
ssa-miR-194b-3p	contig_37613	target from/to=[666,689]	-24.20	Myelin protein zero-like protein 2 precursor [Salmo salar]
ssa-miR-128-1-5p	contig_41607	target from/to=[1044,1064]	-24.20	PREDICTED: oxidation resistance protein 1-like, partial [Salmo salar]
ssa-miR-135b-5p	contig_42457	target from/to=[972,994]	-24.20	Transposable element Tc1 transposase [Salmo salar]
ssa-miR-138-5p	contig_53687	target from/to=[1221,1243]	-24.20	PREDICTED: uncharacterized protein LOC106586956 [Salmo salar]
ssa-miR-150-3p	contig_53838	target from/to=[395,415]	-24.20	PREDICTED: carcinoembryonic antigen-related cell adhesion molecule 5-like [Salmo salar]
ssa-miR-128-1-5p	contig_55280	target from/to=[2498,2520]	-24.20	PREDICTED: LIM/homeobox protein Lhx9-like [Salmo salar]
ssa-miR-150-3p	contig_56313	target from/to=[1621,1642]	-24.20	PREDICTED: contactin-associated protein-like 2 [Salmo salar]
ssa-miR-150-3p	contig_57226	target from/to=[562,583]	-24.20	PREDICTED: uncharacterized protein LOC106604997, partial [Salmo salar]
ssa-miR-128-1-5p	contig_60513	target from/to=[279,299]	-24.20	PREDICTED: LOW QUALITY PROTEIN: N-acetyltransferase 14 [Salmo salar]
ssa-miR-92a-5p	contig_65399	target from/to=[195,216]	-24.20	not available
ssa-miR-194a-3p	contig_76770	target from/to=[1058,1078]	-24.20	PREDICTED: tudor domain-containing protein 1 isoform X6 [Salmo salar]
ssa-miR-92a-5p	contig_89722	target from/to=[1090,1113]	-24.20	not available
ssa-miR-194b-3p	contig_101890	target from/to=[3191,3212]	-24.20	PREDICTED: protein-arginine deiminase type-2 isoform X2 [Salmo salar]
ssa-miR-150-3p	contig_38847	target from/to=[1549,1569]	-24.20	PREDICTED: secretogranin-3 isoform X1 [Salmo salar]
ssa-miR-128-1-5p	contig_50316	target from/to=[684,706]	-24.20	Methylmalonate-semialdehyde dehydrogenase [Salmo salar]
ssa-miR-92a-5p	contig_63955	target from/to=[159,180]	-24.20	PREDICTED: sphingosine 1-phosphate receptor 3 [Salmo salar]
ssa-miR-8157-3p	contig_2771	target from/to=[2431,2452]	-24.20	PREDICTED: targeting protein for Xklp2-like isoform X1 [Salmo salar]
ssa-miR-19c-3-5p	contig_17818	target from/to=[1432,1454]	-24.20	PREDICTED: histone-lysine N-methyltransferase NSD2-like [Salmo salar]
ssa-miR-214-3p	contig_21197	target from/to=[465,486]	-24.20	PREDICTED: transforming growth factor-beta receptor-associated protein 1 isoform X3 [Salmo salar]
ssa-miR-462b-3p	contig_30253	target from/to=[1267,1289]	-24.20	PREDICTED: transposon Tf2-1 polyprotein [Salmo salar]
ssa-miR-8157-3p	contig_30466	target from/to=[1168,1191]	-24.20	PREDICTED: galectin-3-binding protein A-like [Salmo salar]
ssa-miR-8156-5p	contig_31491	target from/to=[803,826]	-24.20	not available
ssa-miR-8156-5p	contig_40878	target from/to=[2551,2571]	-24.20	PREDICTED: phospholipid-transporting ATPase IG-like isoform X2 [Salmo salar]
ssa-miR-462b-3p	contig_49046	target from/to=[924,946]	-24.20	PREDICTED: transposon Tf2-1 polyprotein [Salmo salar]
ssa-miR-19c-3-5p	contig_54236	target from/to=[1527,1547]	-24.20	PREDICTED: uncharacterized protein LOC106590176 [Salmo salar]
ssa-miR-205a-5p	contig_55399	target from/to=[36,58]	-24.20	not available
ssa-miR-30a-4-3p	contig_70321	target from/to=[216,236]	-24.20	PREDICTED: BCL2/adenovirus E1B 19 kDa protein-interacting protein 3-like [Salmo salar]
ssa-miR-19c-3p	contig_76770	target from/to=[468,491]	-24.20	PREDICTED: tudor domain-containing protein 1 isoform X6 [Salmo salar]
ssa-miR-462b-3p	contig_91486	target from/to=[683,705]	-24.20	PREDICTED: RNA-directed DNA polymerase homolog [Salmo salar]
ssa-miR-8157-3p	contig_48474	target from/to=[7,26]	-24.20	PREDICTED: choline transporter-like protein 2 isoform X1 [Salmo salar]
ssa-miR-30a-4-3p	contig_54056	target from/to=[1093,1115]	-24.20	PREDICTED: pleckstrin homology domain-containing family H member 1-like [Salmo salar]
ssa-miR-8157-3p	contig_91085	target from/to=[2074,2096]	-24.20	PREDICTED: suppressor APC domain-containing protein 2-like isoform X1 [Salmo salar]
ssa-miR-150-3p	contig_10929	target from/to=[1811,1833]	-24.10	PREDICTED: kynurenine--oxoglutarate transaminase 1-like isoform X3 [Salmo salar]
ssa-miR-150-3p	contig_12850	target from/to=[3046,3068]	-24.10	PREDICTED: succinyl-CoA ligase [GDP-forming] subunit beta, mitochondrial-like [Salmo salar]
ssa-miR-128-1-5p	contig_20421	target from/to=[1216,1240]	-24.10	PREDICTED: ell-associated factor Eaf-like [Salmo salar]
ssa-miR-30d-5p	contig_25788	target from/to=[217,240]	-24.10	PREDICTED: N-lysine methyltransferase SETD8 [Salmo salar]
ssa-miR-150-3p	contig_26031	target from/to=[2222,2243]	-24.10	PREDICTED: interferon-induced protein with tetratricopeptide repeats 1-like [Salmo salar]
ssa-miR-128-1-5p	contig_36948	target from/to=[2366,2385]	-24.10	PREDICTED: ankyrin repeat and EF-hand domain-containing protein 1-like [Salmo salar]
ssa-miR-16b-3p	contig_50048	target from/to=[871,891]	-24.10	Deoxyribonuclease gamma precursor [Salmo salar]
ssa-miR-8160-5p	contig_60258	target from/to=[507,527]	-24.10	PREDICTED: neurexin-1a-like isoform X11 [Salmo salar]
ssa-miR-128-1-5p	contig_7414	target from/to=[466,486]	-24.10	PREDICTED: serine/threonine-protein kinase kin-29-like isoform X1 [Salmo salar]
ssa-miR-1788-3p	contig_20880	target from/to=[1195,1216]	-24.10	PREDICTED: interferon-induced, double-stranded RNA-activated protein kinase isoform X2 [Salmo salar]
ssa-miR-128-1-5p	contig_44889	target from/to=[744,765]	-24.10	PREDICTED: N(G),N(G)-dimethylarginine dimethylaminohydrolase 1 [Salmo salar]
ssa-miR-128-1-5p	contig_61117	target from/to=[979,1002]	-24.10	PREDICTED: SH3-containing GRB2-like protein 3-interacting protein 1 isoform X6 [Salmo salar]
ssa-miR-150-3p	contig_104773	target from/to=[779,798]	-24.10	PREDICTED: tripartite motif-containing protein 35-like [Salmo salar]
ssa-miR-128-1-5p	contig_167262	target from/to=[266,287]	-24.10	PREDICTED: sodium- and chloride-dependent GABA transporter 2-like [Salmo salar]
ssa-miR-8157-3p	contig_30	target from/to=[177,203]	-24.10	Transposable element Tcb1 transposase [Salmo salar]
ssa-miR-8156-5p	contig_4802	target from/to=[1503,1524]	-24.10	NEDD8 ultimate buster 1 [Salmo salar]
ssa-miR-8156-5p	contig_12246	target from/to=[1019,1043]	-24.10	PREDICTED: ribonuclease-like 3, partial [Salmo salar]
ssa-miR-18a-5p	contig_26086	target from/to=[1701,1721]	-24.10	wibg homolog [Salmo salar]
ssa-miR-30a-4-3p	contig_30882	target from/to=[1257,1278]	-24.10	PREDICTED: HMG box-containing protein 1-like isoform X2 [Salmo salar]
ssa-miR-8156-5p	contig_32361	target from/to=[673,692]	-24.10	PREDICTED: F-box-like/WD repeat-containing protein TBL1X [Salmo salar]
ssa-miR-30a-4-3p	contig_41055	target from/to=[1562,1584]	-24.10	PREDICTED: GTP:AMP phosphotransferase AK3, mitochondrial-like isoform X2 [Salmo salar]
ssa-miR-202-5p	contig_46207	target from/to=[15,36]	-24.10	interleukin-17A/F3 [Salmo salar]
ssa-miR-150-5p	contig_47355	target from/to=[105,124]	-24.10	ORF2 protein [Salmo salar]
ssa-miR-30a-4-3p	contig_53007	target from/to=[1196,1217]	-24.10	PREDICTED: nuclear receptor ROR-beta-like [Salmo salar]
ssa-miR-8157-3p	contig_56920	target from/to=[1681,1701]	-24.10	PREDICTED: retinoblastoma-like protein 2 isoform X4 [Salmo salar]
ssa-miR-30a-4-3p	contig_60381	target from/to=[39,59]	-24.10	PREDICTED: RNA-binding protein 33 isoform X4 [Salmo salar]
ssa-miR-462b-3p	contig_65632	target from/to=[1904,1925]	-24.10	not available
ssa-miR-30a-4-3p	contig_77343	target from/to=[243,261]	-24.10	PREDICTED: alpha-2A adrenergic receptor-like [Salmo salar]
ssa-miR-8157-3p	contig_106353	target from/to=[479,500]	-24.10	PREDICTED: serine--tRNA ligase, mitochondrial isoform X2 [Salmo salar]
ssa-miR-8157-3p	contig_67451	target from/to=[591,615]	-24.10	not available
ssa-miR-214-3p	contig_94270	target from/to=[290,312]	-24.10	not available
ssa-miR-92a-5p	contig_2464	target from/to=[775,799]	-24.00	PREDICTED: uncharacterized protein LOC106587367 isoform X1 [Salmo salar]
ssa-miR-138-5p	contig_3018	target from/to=[3943,3968]	-24.00	PREDICTED: AFG3-like protein 1 [Salmo salar]
ssa-miR-150-3p	contig_6206	target from/to=[162,183]	-24.00	PREDICTED: neuronal acetylcholine receptor subunit alpha-9-like isoform X1 [Salmo salar]
ssa-miR-106b-3p	contig_9867	target from/to=[1872,1895]	-24.00	PREDICTED: kinesin-like protein KIF20A [Salmo salar]
ssa-miR-150-3p	contig_14393	target from/to=[192,212]	-24.00	PREDICTED: dematin isoform X5 [Salmo salar]
ssa-miR-150-3p	contig_16640	target from/to=[1579,1602]	-24.00	Interferon-related developmental regulator 1 [Salmo salar]
ssa-miR-150-3p	contig_16781	target from/to=[376,400]	-24.00	PREDICTED: ankyrin repeat and EF-hand domain-containing protein 1-like [Salmo salar]
ssa-miR-30b-3p	contig_17573	target from/to=[2596,2617]	-24.00	PREDICTED: transmembrane protein 168-A-like [Salmo salar]
ssa-miR-150-3p	contig_24192	target from/to=[511,531]	-24.00	PREDICTED: lamina-associated polypeptide 2, isoform beta-like isoform X8 [Salmo salar]
ssa-miR-23a-4-5p	contig_28135	target from/to=[112,132]	-24.00	PREDICTED: protein FAM127-like [Salmo salar]
ssa-miR-30b-3p	contig_31539	target from/to=[635,656]	-24.00	not available
ssa-miR-449b-5p	contig_32404	target from/to=[421,441]	-24.00	Arrestin domain-containing protein 3 [Salmo salar]
ssa-miR-92a-5p	contig_39353	target from/to=[231,252]	-24.00	PREDICTED: WNT1-inducible-signaling pathway protein 1-like [Salmo salar]
ssa-miR-135b-5p	contig_43592	target from/to=[2479,2502]	-24.00	PREDICTED: dematin isoform X5 [Salmo salar]
ssa-miR-194a-3p	contig_45675	target from/to=[1604,1630]	-24.00	PREDICTED: von Willebrand factor A domain-containing protein 7-like [Salmo salar]
ssa-miR-128-1-5p	contig_46702	target from/to=[1195,1217]	-24.00	PREDICTED: GTPase-activating protein and VPS9 domain-containing protein 1-like isoform X6 [Salmo salar]
ssa-miR-150-3p	contig_47480	target from/to=[998,1020]	-24.00	PREDICTED: uncharacterized protein LOC106607134 isoform X1 [Salmo salar]
ssa-miR-150-3p	contig_66675	target from/to=[559,580]	-24.00	PREDICTED: dystrobrevin beta-like isoform X11 [Salmo salar]
ssa-miR-128-1-5p	contig_69645	target from/to=[367,386]	-24.00	PREDICTED: gem-associated protein 4-like [Salmo salar]
ssa-miR-128-1-5p	contig_71158	target from/to=[2625,2647]	-24.00	Deoxyribonuclease gamma precursor [Salmo salar]
ssa-miR-92a-5p	contig_92495	target from/to=[1205,1227]	-24.00	PREDICTED: mediator of RNA polymerase II transcription subunit 13-like isoform X4 [Salmo salar]
ssa-miR-30b-3p	contig_112648	target from/to=[169,193]	-24.00	Transposable element Tcb1 transposase [Salmo salar]
ssa-miR-96-5p	contig_133805	target from/to=[741,763]	-24.00	Deoxyribonuclease gamma precursor [Salmo salar]
ssa-miR-194b-3p	contig_18864	target from/to=[2427,2448]	-24.00	PREDICTED: solute carrier family 41 member 1-like [Salmo salar]
ssa-miR-150-3p	contig_23955	target from/to=[1907,1927]	-24.00	PREDICTED: BAG family molecular chaperone regulator 5-like isoform X3 [Salmo salar]
ssa-miR-128-1-5p	contig_26256	target from/to=[977,1001]	-24.00	PREDICTED: tRNA wybutosine-synthesizing protein 2 homolog [Salmo salar]
ssa-miR-150-3p	contig_58688	target from/to=[2027,2048]	-24.00	PREDICTED: rhotekin-like isoform X1 [Salmo salar]
ssa-miR-194a-3p	contig_76905	target from/to=[2673,2697]	-24.00	PREDICTED: inverted formin-2-like [Salmo salar]
ssa-miR-128-1-5p	contig_104530	target from/to=[2135,2157]	-24.00	PREDICTED: rootletin-like isoform X1 [Salmo salar]
ssa-miR-462b-3p	contig_2495	target from/to=[1616,1638]	-24.00	Porphobilinogen deaminase [Salmo salar]
ssa-miR-8157-3p	contig_23120	target from/to=[835,858]	-24.00	PREDICTED: wee1-like protein kinase 1-A isoform X1 [Salmo salar]
ssa-miR-128-3p	contig_43593	target from/to=[291,313]	-24.00	PREDICTED: uncharacterized protein LOC106605384, partial [Salmo salar]
ssa-miR-8157-3p	contig_54541	target from/to=[739,760]	-24.00	PREDICTED: protein fuzzy homolog [Salmo salar]
ssa-miR-125b-5p	contig_83335	target from/to=[427,450]	-24.00	PREDICTED: uncharacterized protein LOC106609046 isoform X4 [Salmo salar]
ssa-miR-30a-4-3p	contig_140166	target from/to=[257,279]	-24.00	PREDICTED: tripartite motif-containing protein 16-like [Salmo salar]
ssa-miR-30a-4-3p	contig_173367	target from/to=[23,46]	-24.00	PREDICTED: protein PRRC2C-like isoform X6 [Salmo salar]
ssa-miR-8157-3p	contig_22506	target from/to=[314,337]	-24.00	PREDICTED: uncharacterized protein LOC106612183 isoform X1 [Salmo salar]
ssa-miR-30a-4-3p	contig_38654	target from/to=[710,731]	-24.00	PREDICTED: T-cell surface antigen CD2-like, partial [Salmo salar]
ssa-miR-8157-3p	contig_47161	target from/to=[1204,1226]	-24.00	PREDICTED: multidrug resistance-associated protein 4-like [Salmo salar]
ssa-miR-30a-4-3p	contig_88896	target from/to=[213,236]	-23.99	Solute carrier family 25 member 38 [Salmo salar]
ssa-miR-128-1-5p	contig_194	target from/to=[2069,2091]	-23.90	PREDICTED: protein MMS22-like isoform X1 [Salmo salar]
ssa-miR-194a-3p	contig_1779	target from/to=[2041,2064]	-23.90	PREDICTED: protein FAM83D-like isoform X1 [Salmo salar]
ssa-miR-150-3p	contig_1785	target from/to=[1718,1738]	-23.90	Targeting protein for Xklp2 [Salmo salar]
ssa-miR-150-3p	contig_7220	target from/to=[794,813]	-23.90	PREDICTED: kinesin-like protein KIF20A isoform X1 [Salmo salar]
ssa-miR-462a-3p	contig_7220	target from/to=[3734,3752]	-23.90	PREDICTED: kinesin-like protein KIF20A isoform X1 [Salmo salar]
ssa-miR-16b-3p	contig_9288	target from/to=[441,464]	-23.90	HIG1 domain family member 1A [Salmo salar]
ssa-miR-30d-5p	contig_10206	target from/to=[1134,1157]	-23.90	PREDICTED: gastrula zinc finger protein XlCGF7.1-like [Salmo salar]
ssa-miR-194a-3p	contig_11559	target from/to=[1376,1400]	-23.90	PREDICTED: histone H4 transcription factor [Salmo salar]
ssa-miR-1788-3p	contig_13387	target from/to=[3807,3829]	-23.90	PREDICTED: nuclear receptor-binding protein 2-like [Salmo salar]
ssa-miR-138-5p	contig_24341	target from/to=[190,210]	-23.90	PREDICTED: trafficking protein particle complex subunit 4-like [Salmo salar]
ssa-miR-128-1-5p	contig_24892	target from/to=[644,665]	-23.90	PREDICTED: hyaluronidase-2-like isoform X2 [Salmo salar]
ssa-miR-92a-5p	contig_26973	target from/to=[159,181]	-23.90	not available
ssa-miR-449b-5p	contig_38548	target from/to=[125,146]	-23.90	PREDICTED: neurotrophin receptor-interacting factor 1-like isoform X1 [Salmo salar]
ssa-miR-150-3p	contig_40919	target from/to=[1716,1737]	-23.90	PREDICTED: protein regulator of cytokinesis 1-like isoform X1 [Salmo salar]
ssa-miR-128-1-5p	contig_44117	target from/to=[1313,1335]	-23.90	Transcription factor 21 [Salmo salar]
ssa-miR-194b-3p	contig_47485	target from/to=[1346,1368]	-23.90	PREDICTED: uncharacterized protein LOC106561001 isoform X1 [Salmo salar]
ssa-miR-150-3p	contig_76934	target from/to=[361,382]	-23.90	PREDICTED: putative protein TPRXL [Salmo salar]
ssa-miR-194b-3p	contig_108343	target from/to=[856,878]	-23.90	PREDICTED: FERM and PDZ domain-containing protein 4-like isoform X4 [Salmo salar]
ssa-miR-150-3p	contig_34897	target from/to=[674,699]	-23.90	PREDICTED: SNARE-associated protein Snapin-like isoform X2 [Salmo salar]
ssa-miR-138-5p	contig_62664	target from/to=[1127,1149]	-23.90	PREDICTED: protein amnionless-like [Salmo salar]
ssa-miR-23a-4-5p	contig_76870	target from/to=[1543,1566]	-23.90	PREDICTED: uncharacterized protein LOC106608107 isoform X1 [Salmo salar]
ssa-miR-462b-3p	contig_3363	target from/to=[1366,1385]	-23.90	PREDICTED: uncharacterized protein LOC106600457 [Salmo salar]
ssa-miR-8157-3p	contig_14686	target from/to=[3688,3709]	-23.90	PREDICTED: cationic amino acid transporter 3-like [Salmo salar]
ssa-miR-202-5p	contig_18580	target from/to=[829,850]	-23.90	PREDICTED: solute carrier family 2, facilitated glucose transporter member 12 isoform X1 [Salmo salar]
ssa-miR-462b-3p	contig_27060	target from/to=[98,117]	-23.90	PREDICTED: uncharacterized protein LOC106600457 [Salmo salar]
ssa-miR-30a-4-3p	contig_39353	target from/to=[315,335]	-23.90	PREDICTED: WNT1-inducible-signaling pathway protein 1-like [Salmo salar]
ssa-miR-214-3p	contig_40254	target from/to=[3649,3673]	-23.90	PREDICTED: afadin- and alpha-actinin-binding protein-like isoform X2 [Salmo salar]
ssa-miR-8157-3p	contig_52588	target from/to=[655,675]	-23.90	PREDICTED: claudin-11-like isoform X1 [Salmo salar]
ssa-miR-462b-3p	contig_58898	target from/to=[816,839]	-23.90	not available
ssa-miR-499b-3p	contig_64975	target from/to=[611,633]	-23.90	MAP kinase-activated protein kinase 3 [Salmo salar]
ssa-miR-8157-3p	contig_75313	target from/to=[427,448]	-23.90	PREDICTED: protein SCAI-like [Salmo salar]
ssa-miR-30a-4-3p	contig_23944	target from/to=[2622,2642]	-23.90	PREDICTED: matrix metalloproteinase-14-like [Salmo salar]
ssa-miR-30a-4-3p	contig_57124	target from/to=[2146,2167]	-23.90	PREDICTED: semaphorin-6B-like isoform X3 [Salmo salar]
ssa-miR-150-5p	contig_65873	target from/to=[1432,1451]	-23.90	PREDICTED: E3 ubiquitin-protein ligase RNF144A-like [Salmo salar]
ssa-miR-8156-5p	contig_68015	target from/to=[1093,1113]	-23.90	PREDICTED: hydroxyacid-oxoacid transhydrogenase, mitochondrial isoform X2 [Salmo salar]
ssa-miR-30a-4-3p	contig_138956	target from/to=[77,97]	-23.90	ADP-ribosylation factor 3 [Salmo salar]
ssa-miR-30a-4-3p	contig_24164	target from/to=[838,858]	-23.82	PREDICTED: UPF0317 protein C14orf159 homolog, mitochondrial isoform X2 [Salmo salar]
ssa-miR-128-1-5p	contig_279	target from/to=[1176,1200]	-23.80	PREDICTED: cyclin-D1-binding protein 1 [Salmo salar]
ssa-miR-150-3p	contig_2766	target from/to=[1414,1435]	-23.80	PREDICTED: kelch-like protein 20 isoform X1 [Salmo salar]
ssa-miR-462a-3p	contig_7581	target from/to=[301,320]	-23.80	not available
ssa-miR-150-3p	contig_10611	target from/to=[2413,2432]	-23.80	PREDICTED: uncharacterized protein LOC106582478 [Salmo salar]
ssa-miR-138-5p	contig_11424	target from/to=[137,159]	-23.80	zinc finger protein 180-like protein isoform X2 [Salmo salar]
ssa-miR-150-3p	contig_12413	target from/to=[924,944]	-23.80	PREDICTED: serine/threonine-protein kinase Chk1 [Salmo salar]
ssa-miR-150-3p	contig_13911	target from/to=[2036,2056]	-23.80	PREDICTED: vacuolar protein sorting-associated protein 37B-like [Salmo salar]
ssa-miR-194a-3p	contig_16165	target from/to=[443,466]	-23.80	PREDICTED: SH3 domain-binding protein 1-like [Salmo salar]
ssa-miR-150-3p	contig_19615	target from/to=[938,960]	-23.80	PREDICTED: protein NDRG2-like [Salmo salar]
ssa-miR-194b-3p	contig_25246	target from/to=[359,380]	-23.80	myosin 1, partial [Salmo salar]
ssa-miR-194b-3p	contig_29396	target from/to=[1094,1115]	-23.80	PREDICTED: glucose-induced degradation protein 4 homolog, partial [Salmo salar]
ssa-miR-138-5p	contig_30466	target from/to=[4029,4052]	-23.80	PREDICTED: galectin-3-binding protein A-like [Salmo salar]
ssa-miR-194a-3p	contig_31238	target from/to=[43,65]	-23.80	vacuolar proton pump subunit D-2, partial [Salmo salar]
ssa-miR-194b-3p	contig_34551	target from/to=[1882,1905]	-23.80	PREDICTED: acidic leucine-rich nuclear phosphoprotein 32 family member B-like isoform X1 [Salmo salar]
ssa-miR-128-1-5p	contig_35837	target from/to=[677,699]	-23.80	PREDICTED: protein TSSC4-like [Salmo salar]
ssa-miR-150-3p	contig_38863	target from/to=[323,345]	-23.80	not available
ssa-miR-462a-3p	contig_49413	target from/to=[1149,1167]	-23.80	PREDICTED: protein FAM118B-like isoform X2 [Salmo salar]
ssa-miR-150-3p	contig_54774	target from/to=[478,499]	-23.80	UPF0527 membrane protein [Salmo salar]
ssa-miR-30b-3p	contig_55148	target from/to=[60,83]	-23.80	not available
ssa-miR-92a-5p	contig_59323	target from/to=[86,109]	-23.80	PREDICTED: uncharacterized protein LOC106571143 isoform X1 [Salmo salar]
ssa-miR-150-3p	contig_66562	target from/to=[528,550]	-23.80	olfactory receptor family C subfamily 4 member 9 [Salmo salar]
ssa-miR-92a-5p	contig_129	target from/to=[978,1001]	-23.80	PREDICTED: 1-phosphatidylinositol 4,5-bisphosphate phosphodiesterase beta-1-like isoform X2 [Salmo salar]
ssa-miR-196a-5p	contig_1762	target from/to=[2366,2388]	-23.80	PREDICTED: prostaglandin reductase 1-like isoform X1 [Salmo salar]
ssa-miR-150-3p	contig_7146	target from/to=[746,769]	-23.80	Synaptophysin-like protein 1 [Salmo salar]
ssa-miR-106b-3p	contig_18864	target from/to=[2428,2451]	-23.80	PREDICTED: solute carrier family 41 member 1-like [Salmo salar]
ssa-miR-194a-5p	contig_24164	target from/to=[1531,1555]	-23.80	PREDICTED: UPF0317 protein C14orf159 homolog, mitochondrial isoform X2 [Salmo salar]
ssa-miR-194b-3p	contig_26784	target from/to=[916,938]	-23.80	PREDICTED: arrestin domain-containing protein 1-like [Salmo salar]
ssa-miR-194a-3p	contig_27878	target from/to=[379,400]	-23.80	PREDICTED: uncharacterized protein LOC106578716 [Salmo salar]
ssa-miR-92a-5p	contig_51524	target from/to=[838,860]	-23.80	PREDICTED: S-antigen protein-like [Salmo salar]
ssa-miR-92a-5p	contig_54056	target from/to=[1099,1118]	-23.80	PREDICTED: pleckstrin homology domain-containing family H member 1-like [Salmo salar]
ssa-miR-8157-3p	contig_7966	target from/to=[1359,1382]	-23.80	PREDICTED: lysosomal alpha-mannosidase-like [Salmo salar]
ssa-miR-8157-3p	contig_8022	target from/to=[34,56]	-23.80	CD83, partial [Salmo salar]
ssa-miR-725-3p	contig_8730	target from/to=[3913,3934]	-23.80	PREDICTED: nuclear receptor coactivator 4-like isoform X1 [Salmo salar]
ssa-miR-181a-3-3p	contig_12744	target from/to=[1235,1254]	-23.80	PREDICTED: trichohyalin-like [Salmo salar]
ssa-miR-202-5p	contig_21241	target from/to=[1059,1081]	-23.80	not available
ssa-miR-462b-3p	contig_27813	target from/to=[491,511]	-23.80	F54F2.7 [Salmo salar]
ssa-miR-8157-3p	contig_31430	target from/to=[671,695]	-23.80	PREDICTED: SAC3 domain-containing protein 1 isoform X3 [Salmo salar]
ssa-miR-8157-3p	contig_32936	target from/to=[1444,1465]	-23.80	PREDICTED: ATP-binding cassette sub-family G member 2 isoform X1 [Salmo salar]
ssa-miR-122-5p	contig_34340	target from/to=[1464,1485]	-23.80	PREDICTED: myb-related transcription factor, partner of profilin-like [Salmo salar]
ssa-miR-8157-3p	contig_35746	target from/to=[2203,2227]	-23.80	PREDICTED: neurotrophin receptor-interacting factor 1-like isoform X1 [Salmo salar]
ssa-miR-8157-3p	contig_42469	target from/to=[2298,2318]	-23.80	not available
ssa-miR-8157-3p	contig_43592	target from/to=[1818,1837]	-23.80	PREDICTED: dematin isoform X5 [Salmo salar]
ssa-miR-125b-5p	contig_44096	target from/to=[744,765]	-23.80	PREDICTED: retinol dehydrogenase 12-like isoform X1 [Salmo salar]
ssa-miR-8156-5p	contig_50904	target from/to=[1884,1904]	-23.80	PREDICTED: putative sodium-coupled neutral amino acid transporter 10 isoform X4 [Salmo salar]
ssa-miR-8157-3p	contig_57927	target from/to=[177,196]	-23.80	Deoxyribonuclease gamma precursor [Salmo salar]
ssa-miR-8157-3p	contig_73570	target from/to=[666,686]	-23.80	PREDICTED: activating molecule in BECN1-regulated autophagy protein 1-like isoform X4 [Salmo salar]
ssa-miR-8157-3p	contig_102267	target from/to=[164,185]	-23.80	PREDICTED: glucose-6-phosphate isomerase-like [Salmo salar]
ssa-miR-30a-4-3p	contig_7526	target from/to=[574,595]	-23.80	PREDICTED: selenoprotein P [Salmo salar]
ssa-miR-462b-3p	contig_115939	target from/to=[274,297]	-23.80	Myosin-VI, partial [Salmo salar]
ssa-miR-214-3p	contig_153377	target from/to=[43,65]	-23.80	PREDICTED: neuroligin-3-like isoform X3 [Salmo salar]
ssa-miR-138-5p	contig_51953	target from/to=[539,560]	-23.72	PREDICTED: DNA replication ATP-dependent helicase/nuclease DNA2 [Salmo salar]
ssa-miR-155-3p	contig_194	target from/to=[2366,2386]	-23.70	PREDICTED: protein MMS22-like isoform X1 [Salmo salar]
ssa-miR-192b-5p	contig_248	target from/to=[371,391]	-23.70	Thymidylate synthase [Salmo salar]
ssa-miR-20a-1-3p	contig_809	target from/to=[1175,1195]	-23.70	Transposable element Tcb1 transposase [Salmo salar]
ssa-miR-128-1-5p	contig_1779	target from/to=[1296,1317]	-23.70	PREDICTED: protein FAM83D-like isoform X1 [Salmo salar]
ssa-miR-150-3p	contig_3018	target from/to=[4004,4023]	-23.70	PREDICTED: AFG3-like protein 1 [Salmo salar]
ssa-miR-92a-5p	contig_4680	target from/to=[1132,1155]	-23.70	PREDICTED: hematopoietic progenitor cell antigen CD34-like isoform X1 [Salmo salar]
ssa-miR-128-1-5p	contig_8144	target from/to=[1632,1655]	-23.70	PREDICTED: uncharacterized protein KIAA0895-like isoform X4 [Salmo salar]
ssa-miR-194b-3p	contig_8730	target from/to=[1319,1340]	-23.70	PREDICTED: nuclear receptor coactivator 4-like isoform X1 [Salmo salar]
ssa-miR-150-3p	contig_14866	target from/to=[2698,2722]	-23.70	PREDICTED: sorting nexin-21-like [Salmo salar]
ssa-miR-138-5p	contig_16254	target from/to=[38,60]	-23.70	SLAM family member 7 precursor [Salmo salar]
ssa-miR-150-3p	contig_17365	target from/to=[2186,2205]	-23.70	PREDICTED: retinol dehydrogenase 11-like isoform X1 [Salmo salar]
ssa-miR-128-1-5p	contig_19947	target from/to=[3128,3152]	-23.70	PREDICTED: actin-binding protein anillin-like isoform X6 [Salmo salar]
ssa-miR-150-3p	contig_21241	target from/to=[1062,1086]	-23.70	not available
ssa-miR-222b-5p	contig_24712	target from/to=[655,677]	-23.70	PREDICTED: serine/threonine-protein kinase VRK1-like isoform X1 [Salmo salar]
ssa-miR-133a-3p	contig_26961	target from/to=[1633,1656]	-23.70	PREDICTED: BUD13 homolog [Salmo salar]
ssa-miR-30b-3p	contig_29167	target from/to=[83,106]	-23.70	PREDICTED: deoxyuridine 5'-triphosphate nucleotidohydrolase, mitochondrial isoform X1 [Salmo salar]
ssa-miR-150-3p	contig_29218	target from/to=[671,694]	-23.70	not available
ssa-miR-150-3p	contig_30931	target from/to=[937,956]	-23.70	PREDICTED: uncharacterized protein LOC106561506 [Salmo salar]
ssa-miR-128-1-5p	contig_46900	target from/to=[466,488]	-23.70	PREDICTED: phospholipid-transporting ATPase IG-like isoform X4 [Salmo salar]
ssa-miR-150-3p	contig_52082	target from/to=[1562,1582]	-23.70	THAP domain-containing protein 7 [Salmo salar]
ssa-miR-150-3p	contig_52874	target from/to=[1040,1063]	-23.70	PREDICTED: junctional adhesion molecule B-like [Salmo salar]
ssa-miR-150-3p	contig_55545	target from/to=[298,319]	-23.70	hypothetical protein [Salmo salar]
ssa-miR-194a-3p	contig_63661	target from/to=[16,37]	-23.70	PREDICTED: elongation of very long chain fatty acids protein 6-like [Salmo salar]
ssa-miR-150-3p	contig_63661	target from/to=[754,777]	-23.70	PREDICTED: elongation of very long chain fatty acids protein 6-like [Salmo salar]
ssa-miR-92a-5p	contig_69489	target from/to=[1782,1805]	-23.70	PREDICTED: ubiquitin-conjugating enzyme E2 G1 isoform X1 [Salmo salar]
ssa-miR-449a-5p	contig_75281	target from/to=[377,398]	-23.70	PREDICTED: required for meiotic nuclear division protein 1 homolog [Salmo salar]
ssa-miR-150-3p	contig_76908	target from/to=[373,397]	-23.70	Charged multivesicular body protein 3 [Salmo salar]
ssa-miR-150-3p	contig_82222	target from/to=[54,74]	-23.70	not available
ssa-miR-150-3p	contig_101890	target from/to=[3133,3155]	-23.70	PREDICTED: protein-arginine deiminase type-2 isoform X2 [Salmo salar]
ssa-miR-128-1-5p	contig_103042	target from/to=[1096,1119]	-23.70	PREDICTED: ribonuclease ZC3H12A [Salmo salar]
ssa-miR-128-1-5p	contig_107421	target from/to=[908,929]	-23.70	PREDICTED: cytochrome c oxidase subunit 6A1, mitochondrial-like [Salmo salar]
ssa-miR-192b-5p	contig_109950	target from/to=[604,625]	-23.70	PREDICTED: uncharacterized protein LOC106586011 [Salmo salar]
ssa-miR-192a-3p	contig_109950	target from/to=[604,625]	-23.70	PREDICTED: uncharacterized protein LOC106586011 [Salmo salar]
ssa-miR-150-3p	contig_28523	target from/to=[1895,1914]	-23.70	Neutral and basic amino acid transport protein rBAT [Salmo salar]
ssa-miR-192b-5p	contig_43601	target from/to=[802,822]	-23.70	PREDICTED: purine nucleoside phosphorylase-like [Salmo salar]
ssa-miR-128-1-5p	contig_63551	target from/to=[180,205]	-23.70	not available
ssa-miR-150-3p	contig_64502	target from/to=[2114,2138]	-23.70	PREDICTED: double-stranded RNA-specific editase B2 [Salmo salar]
ssa-miR-150-3p	contig_74297	target from/to=[3044,3064]	-23.70	PREDICTED: protocadherin Fat 1-like isoform X5 [Salmo salar]
ssa-miR-92a-5p	contig_95344	target from/to=[1372,1394]	-23.70	PREDICTED: collagen alpha-1(VI) chain-like [Salmo salar]
ssa-miR-8156-5p	contig_3909	target from/to=[100,122]	-23.70	PREDICTED: tetraspanin-8-like isoform X3 [Salmo salar]
ssa-miR-128-3p	contig_4107	target from/to=[1099,1119]	-23.70	PREDICTED: nucleolar and spindle-associated protein 1-like isoform X3 [Salmo salar]
ssa-miR-30a-4-3p	contig_11861	target from/to=[832,854]	-23.70	Replication factor C subunit 4 [Salmo salar]
ssa-miR-30a-4-3p	contig_31254	target from/to=[1162,1184]	-23.70	PREDICTED: uncharacterized protein LOC106609103 isoform X4 [Salmo salar]
ssa-miR-8157-3p	contig_34254	target from/to=[2287,2306]	-23.70	PREDICTED: uncharacterized protein LOC106588899 [Salmo salar]
ssa-miR-30a-4-3p	contig_39953	target from/to=[81,103]	-23.70	not available
ssa-miR-8156-5p	contig_41209	target from/to=[1764,1785]	-23.70	PREDICTED: nuclear factor 7, brain-like [Salmo salar]
ssa-miR-8157-3p	contig_43592	target from/to=[1895,1916]	-23.70	PREDICTED: dematin isoform X5 [Salmo salar]
ssa-miR-8157-3p	contig_43592	target from/to=[1910,1931]	-23.70	PREDICTED: dematin isoform X5 [Salmo salar]
ssa-miR-8157-3p	contig_43592	target from/to=[1925,1946]	-23.70	PREDICTED: dematin isoform X5 [Salmo salar]
ssa-miR-8157-3p	contig_43592	target from/to=[1940,1961]	-23.70	PREDICTED: dematin isoform X5 [Salmo salar]
ssa-miR-8156-5p	contig_58367	target from/to=[881,903]	-23.70	PREDICTED: inositol hexakisphosphate and diphosphoinositol-pentakisphosphate kinase 1 isoform X14 [Salmo salar]
ssa-miR-30a-4-3p	contig_77322	target from/to=[7,27]	-23.70	PREDICTED: pyridoxal-dependent decarboxylase domain-containing protein 1-like isoform X1 [Salmo salar]
ssa-miR-8157-3p	contig_89619	target from/to=[356,378]	-23.70	not available
ssa-miR-19c-3-5p	contig_23944	target from/to=[55,78]	-23.70	PREDICTED: matrix metalloproteinase-14-like [Salmo salar]
ssa-miR-122-5p	contig_34695	target from/to=[1642,1664]	-23.70	not available
ssa-miR-8157-3p	contig_37515	target from/to=[300,319]	-23.70	PREDICTED: zinc finger protein 572-like isoform X2 [Salmo salar]
ssa-miR-19c-3-5p	contig_139824	target from/to=[1160,1184]	-23.70	PREDICTED: lactosylceramide alpha-2,3-sialyltransferase-like, partial [Salmo salar]
ssa-miR-150-3p	contig_6128	target from/to=[1266,1285]	-23.60	PREDICTED: collagen alpha-1(I) chain-like [Salmo salar]
ssa-miR-150-3p	contig_6696	target from/to=[1206,1226]	-23.60	PREDICTED: uncharacterized protein LOC106600457 [Salmo salar]
ssa-miR-194b-3p	contig_6809	target from/to=[594,617]	-23.60	Ubiquitin-conjugating enzyme E2 D2 [Salmo salar]
ssa-miR-196a-5p	contig_9117	target from/to=[992,1012]	-23.60	PREDICTED: collagen alpha-2(VI) chain-like isoform X1 [Salmo salar]
ssa-miR-150-3p	contig_9288	target from/to=[1587,1606]	-23.60	HIG1 domain family member 1A [Salmo salar]
ssa-miR-128-1-5p	contig_11884	target from/to=[2443,2464]	-23.60	PREDICTED: hypoxia-inducible factor 1-alpha inhibitor [Salmo salar]
ssa-miR-449a-5p	contig_11884	target from/to=[2582,2603]	-23.60	PREDICTED: hypoxia-inducible factor 1-alpha inhibitor [Salmo salar]
ssa-miR-128-1-5p	contig_12300	target from/to=[562,587]	-23.60	Deoxyribonuclease gamma precursor [Salmo salar]
ssa-miR-462a-3p	contig_14582	target from/to=[3489,3508]	-23.60	PREDICTED: tetratricopeptide repeat protein 27 isoform X1 [Salmo salar]
ssa-miR-128-1-5p	contig_16796	target from/to=[405,427]	-23.60	PREDICTED: antithrombin-III-like [Salmo salar]
ssa-miR-150-3p	contig_18025	target from/to=[360,381]	-23.60	Interferon-related developmental regulator 1 [Salmo salar]
ssa-miR-194a-3p	contig_19947	target from/to=[3477,3502]	-23.60	PREDICTED: actin-binding protein anillin-like isoform X6 [Salmo salar]
ssa-miR-138-5p	contig_21752	target from/to=[1773,1793]	-23.60	PREDICTED: BTB/POZ domain-containing adapter for CUL3-mediated RhoA degradation protein 2 isoform X1 [Salmo salar]
ssa-miR-92a-5p	contig_21769	target from/to=[927,948]	-23.60	Leucine carboxyl methyltransferase 1 [Salmo salar]
ssa-miR-192a-3p	contig_22577	target from/to=[1448,1467]	-23.60	Interferon-related developmental regulator 2 [Salmo salar]
ssa-miR-459-3p	contig_24830	target from/to=[319,342]	-23.60	PREDICTED: RING finger protein 135 isoform X2 [Salmo salar]
ssa-miR-128-1-5p	contig_24830	target from/to=[573,593]	-23.60	PREDICTED: RING finger protein 135 isoform X2 [Salmo salar]
ssa-miR-192b-5p	contig_25930	target from/to=[410,429]	-23.60	Adenosine kinase [Salmo salar]
ssa-miR-150-3p	contig_31777	target from/to=[139,159]	-23.60	PREDICTED: SNARE-associated protein Snapin-like isoform X2 [Salmo salar]
ssa-miR-128-1-5p	contig_34014	target from/to=[440,463]	-23.60	PREDICTED: uncharacterized protein LOC106579645 [Salmo salar]
ssa-miR-150-3p	contig_36933	target from/to=[261,287]	-23.60	PREDICTED: F-box only protein 22-like [Salmo salar]
ssa-miR-150-3p	contig_45675	target from/to=[1365,1386]	-23.60	PREDICTED: von Willebrand factor A domain-containing protein 7-like [Salmo salar]
ssa-miR-128-1-5p	contig_46060	target from/to=[398,421]	-23.60	RCC2 homolog [Salmo salar]
ssa-miR-194b-3p	contig_48386	target from/to=[1263,1283]	-23.60	PREDICTED: protocadherin-16-like [Salmo salar]
ssa-miR-128-1-5p	contig_50352	target from/to=[2440,2463]	-23.60	hypothetical protein, partial [Salmo salar]
ssa-miR-128-1-5p	contig_51990	target from/to=[88,108]	-23.60	PREDICTED: olfactory receptor 11A1-like [Salmo salar]
ssa-miR-133a-3p	contig_58824	target from/to=[305,325]	-23.60	PREDICTED: dematin isoform X5 [Salmo salar]
ssa-miR-128-1-5p	contig_60258	target from/to=[2216,2236]	-23.60	PREDICTED: neurexin-1a-like isoform X11 [Salmo salar]
ssa-miR-192b-5p	contig_62299	target from/to=[303,324]	-23.60	hypothetical protein [Salmo salar]
ssa-miR-449b-5p	contig_72306	target from/to=[118,138]	-23.60	PREDICTED: pseudouridylate synthase 7 homolog-like protein isoform X2 [Salmo salar]
ssa-miR-194b-3p	contig_77961	target from/to=[1574,1597]	-23.60	PREDICTED: aurora kinase A and ninein-interacting protein isoform X1 [Salmo salar]
ssa-miR-128-1-5p	contig_89722	target from/to=[1306,1327]	-23.60	not available
ssa-miR-30b-3p	contig_129997	target from/to=[85,107]	-23.60	PREDICTED: apoptosis-inducing factor 3-like isoform X1 [Salmo salar]
ssa-miR-192b-5p	contig_20138	target from/to=[741,761]	-23.60	PREDICTED: dimethylaniline monooxygenase [N-oxide-forming] 5-like [Salmo salar]
ssa-miR-150-3p	contig_23944	target from/to=[1285,1304]	-23.60	PREDICTED: matrix metalloproteinase-14-like [Salmo salar]
ssa-miR-128-1-5p	contig_26506	target from/to=[190,213]	-23.60	PREDICTED: uncharacterized protein LOC106601102 [Salmo salar]
ssa-miR-194b-3p	contig_29020	target from/to=[965,985]	-23.60	not available
ssa-miR-462a-3p	contig_29572	target from/to=[1652,1672]	-23.60	PREDICTED: uncharacterized protein LOC106578024 [Salmo salar]
ssa-miR-150-3p	contig_45508	target from/to=[1313,1333]	-23.60	PREDICTED: uncharacterized protein LOC106609103 isoform X4 [Salmo salar]
ssa-miR-92a-5p	contig_46254	target from/to=[450,471]	-23.60	PREDICTED: ras-related protein M-Ras isoform X2 [Salmo salar]
ssa-miR-128-1-5p	contig_74757	target from/to=[3306,3324]	-23.60	PREDICTED: solute carrier family 12 member 3-like [Salmo salar]
ssa-miR-150-3p	contig_80532	target from/to=[235,257]	-23.60	not available
ssa-miR-8157-3p	contig_3670	target from/to=[912,933]	-23.60	PREDICTED: serine incorporator 2-like isoform X1 [Salmo salar]
ssa-miR-30a-4-3p	contig_9280	target from/to=[1439,1461]	-23.60	Lysozyme g [Salmo salar]
ssa-miR-8156-5p	contig_9814	target from/to=[309,330]	-23.60	hypothetical protein, partial [Salmo salar]
ssa-miR-8157-3p	contig_12300	target from/to=[673,692]	-23.60	Deoxyribonuclease gamma precursor [Salmo salar]
ssa-miR-8157-3p	contig_13762	target from/to=[2907,2925]	-23.60	Deoxyribonuclease gamma precursor [Salmo salar]
ssa-miR-30a-4-3p	contig_25518	target from/to=[94,112]	-23.60	Serine/threonine-protein kinase 35 [Salmo salar]
ssa-miR-30a-4-3p	contig_35577	target from/to=[148,170]	-23.60	PREDICTED: potassium voltage-gated channel subfamily KQT member 1-like, partial [Salmo salar]
ssa-miR-150-5p	contig_61597	target from/to=[1118,1141]	-23.60	PREDICTED: protein-methionine sulfoxide oxidase MICAL2-like isoform X7 [Salmo salar]
ssa-miR-205a-5p	contig_69896	target from/to=[898,916]	-23.60	PREDICTED: serine-rich coiled-coil domain-containing protein 1-like isoform X1 [Salmo salar]
ssa-miR-551-3p	contig_70265	target from/to=[81,102]	-23.60	PREDICTED: interphotoreceptor matrix proteoglycan 2 [Salmo salar]
ssa-miR-8156-5p	contig_87424	target from/to=[87,106]	-23.60	PREDICTED: extensin-like, partial [Salmo salar]
ssa-miR-8156-5p	contig_102267	target from/to=[160,178]	-23.60	PREDICTED: glucose-6-phosphate isomerase-like [Salmo salar]
ssa-miR-30a-4-3p	contig_66401	target from/to=[707,728]	-23.60	PREDICTED: sodium- and chloride-dependent GABA transporter 2-like isoform X2 [Salmo salar]
ssa-miR-128-3p	contig_74297	target from/to=[591,613]	-23.60	PREDICTED: protocadherin Fat 1-like isoform X5 [Salmo salar]
ssa-miR-128-1-5p	contig_1841	target from/to=[2078,2101]	-23.50	PREDICTED: biliverdin reductase A [Salmo salar]
ssa-miR-192a-3p	contig_4314	target from/to=[1848,1871]	-23.50	NTF2-related export protein 2 [Salmo salar]
ssa-miR-133a-3p	contig_6128	target from/to=[3108,3129]	-23.50	PREDICTED: collagen alpha-1(I) chain-like [Salmo salar]
ssa-miR-30b-3p	contig_7514	target from/to=[672,695]	-23.50	Transposable element Tcb1 transposase [Salmo salar]
ssa-miR-150-3p	contig_8264	target from/to=[1331,1352]	-23.50	PREDICTED: breast cancer type 1 susceptibility protein isoform X1 [Salmo salar]
ssa-miR-194b-3p	contig_8304	target from/to=[1090,1109]	-23.50	Group XIIB secretory phospholipase A2-like protein precursor [Salmo salar]
ssa-miR-150-3p	contig_12198	target from/to=[1046,1068]	-23.50	PREDICTED: rho GTPase-activating protein 11A-like isoform X3 [Salmo salar]
ssa-miR-92a-5p	contig_13881	target from/to=[2103,2126]	-23.50	PREDICTED: ras-related protein Rab-18-like [Salmo salar]
ssa-miR-222b-5p	contig_14582	target from/to=[3503,3524]	-23.50	PREDICTED: tetratricopeptide repeat protein 27 isoform X1 [Salmo salar]
ssa-miR-150-3p	contig_16374	target from/to=[1287,1309]	-23.50	PREDICTED: sororin-B-like [Salmo salar]
ssa-miR-150-3p	contig_21510	target from/to=[2202,2224]	-23.50	PREDICTED: ATP-binding cassette sub-family G member 2 isoform X1 [Salmo salar]
ssa-miR-15a-5p	contig_22063	target from/to=[175,198]	-23.50	Transposable element Tc1 transposase [Salmo salar]
ssa-miR-194b-3p	contig_23476	target from/to=[268,292]	-23.50	not available
ssa-miR-138-5p	contig_23523	target from/to=[2734,2758]	-23.50	PREDICTED: fibroblast growth factor receptor-like 1 isoform X1 [Salmo salar]
ssa-miR-92a-5p	contig_23827	target from/to=[447,468]	-23.50	PREDICTED: protein FAM186A-like, partial [Salmo salar]
ssa-miR-92a-5p	contig_26509	target from/to=[523,544]	-23.50	PREDICTED: acyl-coenzyme A oxidase-like protein [Salmo salar]
ssa-miR-133a-3p	contig_28693	target from/to=[666,686]	-23.50	myosin 1, partial [Salmo salar]
ssa-miR-449a-5p	contig_29167	target from/to=[217,236]	-23.50	PREDICTED: deoxyuridine 5'-triphosphate nucleotidohydrolase, mitochondrial isoform X1 [Salmo salar]
ssa-miR-106b-3p	contig_35665	target from/to=[171,194]	-23.50	PREDICTED: cysteine-rich, acidic integral membrane protein-like [Salmo salar]
ssa-miR-128-1-5p	contig_35788	target from/to=[287,307]	-23.50	PREDICTED: folliculin-interacting protein 1-like isoform X6 [Salmo salar]
ssa-miR-150-3p	contig_37336	target from/to=[3144,3167]	-23.50	vacuolar protein sorting 52 [Salmo salar]
ssa-miR-194a-3p	contig_42450	target from/to=[223,244]	-23.50	PREDICTED: uncharacterized protein LOC106591608 isoform X3 [Salmo salar]
ssa-miR-462a-3p	contig_50128	target from/to=[232,255]	-23.50	PREDICTED: acyl carrier protein, mitochondrial-like [Salmo salar]
ssa-miR-462a-3p	contig_52082	target from/to=[1537,1558]	-23.50	THAP domain-containing protein 7 [Salmo salar]
ssa-miR-150-3p	contig_54541	target from/to=[1506,1526]	-23.50	PREDICTED: protein fuzzy homolog [Salmo salar]
ssa-miR-155-3p	contig_57573	target from/to=[2144,2164]	-23.50	PREDICTED: zinc fingers and homeoboxes protein 3-like [Salmo salar]
ssa-miR-128-1-5p	contig_59753	target from/to=[797,820]	-23.50	PREDICTED: aftiphilin-like [Salmo salar]
ssa-miR-462a-3p	contig_60394	target from/to=[606,627]	-23.50	PREDICTED: tetratricopeptide repeat protein 28-like [Salmo salar]
ssa-miR-150-3p	contig_61217	target from/to=[16,36]	-23.50	PREDICTED: acyl carrier protein, mitochondrial-like [Salmo salar]
ssa-miR-462a-3p	contig_63978	target from/to=[3,26]	-23.50	PREDICTED: uncharacterized protein LOC106595571 [Salmo salar]
ssa-miR-150-3p	contig_70471	target from/to=[828,849]	-23.50	PREDICTED: mothers against decapentaplegic homolog 4-like isoform X6 [Salmo salar]
ssa-miR-128-1-5p	contig_72306	target from/to=[519,540]	-23.50	PREDICTED: pseudouridylate synthase 7 homolog-like protein isoform X2 [Salmo salar]
ssa-miR-150-3p	contig_75196	target from/to=[543,567]	-23.50	not available
ssa-miR-489-3p	contig_94883	target from/to=[362,384]	-23.50	PREDICTED: LIM domain-binding protein 3 isoform X1 [Salmo salar]
ssa-miR-196a-5p	contig_7146	target from/to=[603,624]	-23.50	Synaptophysin-like protein 1 [Salmo salar]
ssa-miR-150-3p	contig_10569	target from/to=[3132,3156]	-23.50	PREDICTED: free fatty acid receptor 2-like [Salmo salar]
ssa-miR-194a-3p	contig_21167	target from/to=[2203,2224]	-23.50	PREDICTED: tumor necrosis factor receptor superfamily member 16-like [Salmo salar]
ssa-miR-192b-5p	contig_21442	target from/to=[1374,1395]	-23.50	not available
ssa-miR-150-3p	contig_21531	target from/to=[1974,1994]	-23.50	PREDICTED: gamma-crystallin M3-like [Salmo salar]
ssa-miR-106b-3p	contig_48758	target from/to=[855,877]	-23.50	PREDICTED: general transcription factor II-I repeat domain-containing protein 2-like, partial [Salmo salar]
ssa-miR-150-3p	contig_48993	target from/to=[336,362]	-23.50	PREDICTED: SERTA domain-containing protein 2-like [Salmo salar]
ssa-miR-128-1-5p	contig_65305	target from/to=[331,351]	-23.50	PREDICTED: toll-like receptor 13 isoform X1 [Salmo salar]
ssa-miR-20a-1-3p	contig_74757	target from/to=[1880,1903]	-23.50	PREDICTED: solute carrier family 12 member 3-like [Salmo salar]
ssa-miR-196a-5p	contig_115925	target from/to=[81,105]	-23.50	PREDICTED: von Willebrand factor A domain-containing protein 5A-like isoform X4 [Salmo salar]
ssa-miR-551-3p	contig_3131	target from/to=[1754,1776]	-23.50	PREDICTED: transcription factor E3-like [Salmo salar]
ssa-miR-30a-4-3p	contig_3571	target from/to=[3161,3181]	-23.50	PREDICTED: myotubularin-related protein 3-like isoform X2 [Salmo salar]
ssa-miR-20b-5p	contig_3670	target from/to=[3780,3800]	-23.50	PREDICTED: serine incorporator 2-like isoform X1 [Salmo salar]
ssa-miR-30a-4-3p	contig_7564	target from/to=[557,578]	-23.50	PREDICTED: uncharacterized protein LOC106590896 [Salmo salar]
ssa-miR-8156-5p	contig_10182	target from/to=[670,689]	-23.50	PREDICTED: meprin A subunit beta [Salmo salar]
ssa-miR-125a-5p	contig_12263	target from/to=[38,58]	-23.50	PREDICTED: mitotic checkpoint serine/threonine-protein kinase BUB1 beta-like [Salmo salar]
ssa-miR-214-3p	contig_20421	target from/to=[1675,1699]	-23.50	PREDICTED: ell-associated factor Eaf-like [Salmo salar]
ssa-miR-181a-3-3p	contig_22577	target from/to=[916,935]	-23.50	Interferon-related developmental regulator 2 [Salmo salar]
ssa-miR-8156-5p	contig_25958	target from/to=[128,150]	-23.50	Deoxyribonuclease gamma precursor [Salmo salar]
ssa-miR-462b-3p	contig_29047	target from/to=[1835,1856]	-23.50	collagen Type XI Alpha2 [Salmo salar]
ssa-miR-214-3p	contig_34700	target from/to=[1298,1324]	-23.50	PREDICTED: TRAF-type zinc finger domain-containing protein 1-like [Salmo salar]
ssa-let-7a-5p	contig_43592	target from/to=[17,38]	-23.50	PREDICTED: dematin isoform X5 [Salmo salar]
ssa-miR-214-3p	contig_46515	target from/to=[522,545]	-23.50	PREDICTED: phosphatidylinositol 3,4,5-trisphosphate-dependent Rac exchanger 1 protein-like isoform X2 [Salmo salar]
ssa-miR-30a-4-3p	contig_50181	target from/to=[398,419]	-23.50	PREDICTED: uncharacterized protein LOC106568450 [Salmo salar]
ssa-miR-30a-4-3p	contig_24164	target from/to=[765,787]	-23.50	PREDICTED: UPF0317 protein C14orf159 homolog, mitochondrial isoform X2 [Salmo salar]
ssa-miR-30a-4-3p	contig_31795	target from/to=[2362,2387]	-23.50	PREDICTED: uncharacterized protein LOC106594601 [Salmo salar]
ssa-miR-128-1-5p	contig_7305	target from/to=[145,169]	-23.40	PREDICTED: protein-methionine sulfoxide oxidase mical2b-like isoform X7 [Salmo salar]
ssa-miR-194b-3p	contig_8443	target from/to=[1079,1098]	-23.40	Transposable element Tcb1 transposase [Salmo salar]
ssa-miR-106b-3p	contig_9867	target from/to=[1834,1856]	-23.40	PREDICTED: kinesin-like protein KIF20A [Salmo salar]
ssa-miR-92a-5p	contig_11424	target from/to=[1126,1145]	-23.40	zinc finger protein 180-like protein isoform X2 [Salmo salar]
ssa-miR-150-3p	contig_12603	target from/to=[21,42]	-23.40	MHC class I antigen, partial [Salmo salar]
ssa-miR-92a-5p	contig_13387	target from/to=[2469,2489]	-23.40	PREDICTED: nuclear receptor-binding protein 2-like [Salmo salar]
ssa-miR-150-3p	contig_13387	target from/to=[3510,3532]	-23.40	PREDICTED: nuclear receptor-binding protein 2-like [Salmo salar]
ssa-miR-128-1-5p	contig_13692	target from/to=[893,914]	-23.40	PREDICTED: centromere protein O-like [Salmo salar]
ssa-miR-192b-5p	contig_13911	target from/to=[2860,2882]	-23.40	PREDICTED: vacuolar protein sorting-associated protein 37B-like [Salmo salar]
ssa-miR-150-3p	contig_22634	target from/to=[2318,2339]	-23.40	not available
ssa-miR-128-1-5p	contig_31254	target from/to=[1665,1690]	-23.40	PREDICTED: uncharacterized protein LOC106609103 isoform X4 [Salmo salar]
ssa-miR-15a-5p	contig_34700	target from/to=[2257,2281]	-23.40	PREDICTED: TRAF-type zinc finger domain-containing protein 1-like [Salmo salar]
ssa-miR-194a-3p	contig_43592	target from/to=[1323,1345]	-23.40	PREDICTED: dematin isoform X5 [Salmo salar]
ssa-miR-150-3p	contig_45675	target from/to=[1585,1607]	-23.40	PREDICTED: von Willebrand factor A domain-containing protein 7-like [Salmo salar]
ssa-miR-20a-1-3p	contig_48031	target from/to=[248,267]	-23.40	not available
ssa-miR-196a-5p	contig_53679	target from/to=[292,311]	-23.40	C-X-C motif chemokine 13 precursor [Salmo salar]
ssa-miR-194a-3p	contig_58923	target from/to=[2516,2540]	-23.40	PREDICTED: 40S ribosomal protein S5-like [Salmo salar]
ssa-miR-92a-5p	contig_60538	target from/to=[1206,1228]	-23.40	PREDICTED: attractin isoform X1 [Salmo salar]
ssa-miR-192b-5p	contig_66549	target from/to=[1454,1475]	-23.40	Myelin protein zero-like protein 2 precursor [Salmo salar]
ssa-miR-30b-3p	contig_68369	target from/to=[2376,2397]	-23.40	PREDICTED: transcription factor E2F7-like [Salmo salar]
ssa-miR-138-5p	contig_75104	target from/to=[1,24]	-23.40	PREDICTED: grainyhead-like protein 1 homolog isoform X2 [Salmo salar]
ssa-miR-150-3p	contig_76770	target from/to=[645,666]	-23.40	PREDICTED: tudor domain-containing protein 1 isoform X6 [Salmo salar]
ssa-miR-489-3p	contig_78815	target from/to=[162,182]	-23.40	PREDICTED: zinc finger BED domain-containing protein 5-like [Salmo salar]
ssa-miR-194b-3p	contig_78815	target from/to=[454,473]	-23.40	PREDICTED: zinc finger BED domain-containing protein 5-like [Salmo salar]
ssa-miR-194b-3p	contig_82315	target from/to=[593,617]	-23.40	PREDICTED: protein CBFA2T2 isoform X1 [Salmo salar]
ssa-miR-449a-5p	contig_96373	target from/to=[228,248]	-23.40	transposase [Salmo salar]
ssa-miR-128-1-5p	contig_98873	target from/to=[281,304]	-23.40	collagen Type XI Alpha2 [Salmo salar]
ssa-miR-128-1-5p	contig_100508	target from/to=[284,308]	-23.40	PREDICTED: protein FAM217B-like [Salmo salar]
ssa-miR-23a-4-5p	contig_103042	target from/to=[1089,1113]	-23.40	PREDICTED: ribonuclease ZC3H12A [Salmo salar]
ssa-miR-194b-3p	contig_21597	target from/to=[824,847]	-23.40	PREDICTED: LOW QUALITY PROTEIN: endoplasmic reticulum-Golgi intermediate compartment protein 1, partial [Salmo salar]
ssa-miR-92a-5p	contig_59761	target from/to=[270,294]	-23.40	PREDICTED: voltage-gated potassium channel subunit beta-2 isoform X7 [Salmo salar]
ssa-miR-92a-5p	contig_63387	target from/to=[1105,1129]	-23.40	PREDICTED: 5-beta-cholestane-3-alpha,7-alpha-diol 12-alpha-hydroxylase-like [Salmo salar]
ssa-miR-128-1-5p	contig_64261	target from/to=[1335,1360]	-23.40	PREDICTED: glucose-6-phosphate translocase-like [Salmo salar]
[truncated: 64,273 more rows]

## Sheet: intestine
miRNA	contig	site	delta G	Target description
[truncated: 65,536 more rows]
