# Supplementary material for: Whole-Genome Transcript Expression Profiling Reveals Novel Insights into Transposon Genes and Non-Coding RNAs during Atlantic Salmon Seawater Adaptation
Source: Biology (Basel). 2021 Dec 21;11(1):1. doi: 10.3390/biology11010001 (PMC8772943; doi:10.3390/biology11010001)
Supplement: Supplementary file 1 [file biology-11-00001-s001.zip › Table S4_primer list.xlsx]

## Sheet: Hoja1
Primer name	Forward 5'-3'	Revser 5`-3`
ssa-miR-19c-3-5p	CGTTTTGCTGGTTTGCTTTCAGC	NA
ssa-miR-204-5p	TTCCCTTTGTCATCCTATGCCT	NA
ssa-miR-150-3p	TCTCCCAATCCTTGTACCAGT	NA
ssa-miR-18b-5p	TAAGGTGCATCTAGTGCAGATA	NA
ssa-miR-181a-5p	AACATTCAACGCTGTCGGTGAGT	NA
ssa-mir-30d-5p	TGTAAACATCCTTGACTGAAAGCT	NA
ssa-miR-10b-5p	TACCCTGTAGAACCGAATTTGT	NA
ssa-miR-143-3p	GGTGCAGTGCTGCATCTCTGGT	NA
ssa-miR-21b-5p	TAGCTTATCAGACTGGTGTTGGC	NA
ssa-miR-10d-5p	CACCCTGTAGAACCGAATTTGT	NA
ssa-miR-21a-2-3p	CGACAACAGTCTGTAAGCTGTC	NA
ssa-miR-222	GAGACCCAGTAGCCAGATGTAGCT	NA
ssa_HSP70	CAGACCCAGACCTTCACCAC	GCTCAAACTTGCCCAACAGG
ssa_haptoglobin	AAGAGTAGGCAGGACACCCA	GCTCAAGGTGAATGGCTCCT
ssa_ATPase inhibitor_mitochondrial precursor	GCAAAGGAGCAGGAAAGGGA	CCTCTTCATGGTGCTTCCGT
Na K ATPase alpha	GGCCGGCGAGTCCAATCAT	GAGCAGCTGTCCAGGATCCT
Na K ATPase beta	AGCGGCTGCAAGGTGGACAA	GGCAATGTTCCTTGTCTCCAGGGG
transposase-like	ACCGTCGCTCACACTGA	GAGCTCTCAGCAGCCCGATA
Transposable element Tcb2 transposase	TCACAAGAAATGACCGTCGC	CAGAGCTCAAGTTCAGCAGC
Transposable element Tcb1 transposase	TGACCGTCGCTCACAAGAAA	AAGTCAGAGCTCTCAGCAGC
